# Supplementary material for: Functional profiling of long intergenic non-coding RNAs in fission yeast
Source: eLife. 2022 Jan 5;11:e76000. doi: 10.7554/eLife.76000 (PMC8730722; doi:10.7554/eLife.76000)
Supplement: Supplementary file 2. [file elife-76000-supp2.xlsx]

## Sheet: Overview
Supplementary file 2: Phenotype data of lincRNA deletion mutants
Sheets included in this dataset
growth_benign	Differential fitness analysis in benign conditions based on colony sizes, comparing mutants to wild type in the same condition
viability_benign	Differential fitness analysis in benign conditions based on colony redness, comparing mutants to wild type in the same condition
growth_stresses	Differential fitness analysis in stress conditions based on colony sizes, comparing mutants in stressed versus unstressed conditions
viability_stresses	Differential fitness analysis in stress conditions based on colony redness, comparing mutants in stressed versus unstressed conditions
microscopy	Differential size and percentage of binucleated cells based on HT-microscopy data of cells grown in YES-broth
Flow_cytometry	% of cells in each cell cycle stage measured using Flow cytometry
Explanation of column names
mean_effect_size	mean fitness divided by mean of control
mean_effect_size_log2	log2 of mean_effect_size
mean_fitness	mean of non-NA observations for this condition-strain pair (before normalising to control)
mean_fitness_log2	log2 of mean_fitness
median_effect_size	median fitness divided by median of control
median_effect_size_log2	log2 of median_effect_size
median_fitness	median of non-NA observations for this condition-strain pair (before normalising to control)
median_fitness_log2	log2 of median_fitness
observation_count	number of repeats per condition (after QC filtering)
p_Welch	p-value obtained by Welch's t-test, which does not assume homogeneity of variances
p_Welch_BH	p-value after FDR correction by the Benjamini-Hochberg method
p_Welch_BH_-log10	-log10 of p_Welch_BH
stdev_fitness	standard deviation of non-NA observations for this condition-strain pair (before normalising to control)
strain	strain used in the assay
sample_type	description of the type of strain used in the assay, a ncRNA deletion strain, a thermo sensitive cell cycle mutant (TS) or wt control cell
Number_mono-nucleated_cells	number of mono-nucleated cells measured
median_length_mono-nucleated	median length of mono-nucleated cells measured (micrometers)
FC_dif_%_mono-nucleated	Fold change (in percentage) for median size for mono-nucleated cells
pvalue(wilcox.test)_mono-nucleated	wilcox test p.value for mono-nucleated cells
significance_score_mono-nucleated	column specifying if the strain has a median length for mono-nucleated cells signifficantly different from the wt cells, significant_5 where the size difference is of at least 5 %, significant_10 where the size difference is at least 10 %
number_bi-nucleated_cells	number of bi-nucleated cells measured
median_lenght_bi-nucleated	median length of bi-nucleated cells measured (micrometers)
FC_dif_%_bi-nucleated	Fold change (in percentage) for median size for bi-nucleated cells
pvalue(wilcox.test)_bi-nucleated	wilcox test p.value for bi-nucleated cells
significance_score_bi-nucleated	column specifying if the strain has a median length for bi-nucleated cells signifficantly different from the wt cells, significant_5 where the size difference is of at least 5 %, significant_10 where the size difference is at least 10 %
median_number_of_bi-nucleated_cells_per_field	median number of bi-nucleated cells per field (63 fields counted)
median_number_cells	median number of cells observed per field (63 fields counted)
total_cells_counted	total number of cells counted
median_percentage_bi-nucleated	median percentage of bi-nucleated cells per strain
FC_dif_%_percentage_bi-nucleated	Fold change (in percentage) for the median percentage of bi-nucleated cells per field
pvalue(wilcox.test)_percentage_bi-nucleated	wilcox test p.value for the percentage of bi-nucleated cells
significance_score_percentage_bi-nucleated	column specifying if the strain has a median percentage of bi-nucleated cells per field at least 20 % higher or lower than the wt control
type	column specifying if the strain is a ncRNA deletion, wt or a cell cycle control
ncRNA	identity of the gene
Cell_cycle	phase of the cell cycle
Average	average % of cells in the specified cell cycle phase
SD	standard deviation
N	number of samples per gene
SEM	standard error of the mean

## Sheet: growth_benign
condition_short	RNA_gene	mean_effect_size	mean_effect_size_log2	mean_fitness	mean_fitness_log2	median_effect_size	median_effect_size_log2	median_fitness	median_fitness_log2	observation_count	p_Welch	p_Welch_BH	p_Welch_BH_-log10	stdev_fitness	is_hit
YES-Control	1	0.921432	-0.118051	0.929261	-0.105845	0.990693	-0.0134906	0.996712	-0.00475197	156	2.85911e-10	4.05993e-09	8.39148	0.146128	FALSE
YES-Control	103	0.992741	-0.0105108	1.00118	0.00169535	0.99833	-0.00241182	1.0044	0.00632681	132	0.065059	0.146641	0.833745	0.0429995	FALSE
YES-Control	1039	0.98726	-0.0184978	0.995648	-0.00629167	0.993961	-0.00873863	1	0	207	0.0020038	0.00618564	2.20862	0.0564655	FALSE
YES-Control	1064	1.01017	0.0145961	1.01875	0.0268022	1.00853	0.0122507	1.01466	0.0209894	232	2.35718e-05	0.000107974	3.96668	0.0313018	FALSE
YES-Control	1088	1.0008	0.00115427	1.0093	0.0133604	1.00282	0.00405583	1.00891	0.0127945	155	0.701377	0.781096	0.107296	0.021199	FALSE
YES-Control	1097	0.967291	-0.0479782	0.97551	-0.0357721	0.986964	-0.0189307	0.99296	-0.0101921	12	0.299367	0.40875	0.388542	0.104845	FALSE
YES-Control	1119	1.00679	0.00975762	1.01534	0.0219638	0.997587	-0.00348604	1.00365	0.00525259	6	0.767679	0.825836	0.083106	0.0536768	FALSE
YES-Control	1122	1.00322	0.00463177	1.01174	0.0168379	1.00193	0.00278171	1.00802	0.0115203	162	0.175164	0.310915	0.507358	0.0259885	FALSE
YES-Control	1125	1.00291	0.00419773	1.01144	0.0164039	1.00552	0.00794081	1.01163	0.0166794	155	0.244994	0.363516	0.439476	0.0273783	FALSE
YES-Control	1130	1.008	0.0114958	1.01656	0.0237019	1.01113	0.0159717	1.01728	0.0247103	155	8.20529e-05	0.000332901	3.47769	0.0199835	FALSE
YES-Control	115	0.978366	-0.0315541	0.986679	-0.0193479	0.986148	-0.0201235	0.99214	-0.0113849	155	7.0468e-08	6.25404e-07	6.20384	0.0459077	FALSE
YES-Control	1154	1.00005	6.75237e-05	1.00854	0.0122737	0.999636	-0.000525697	1.00571	0.00821293	153	0.979663	0.993132	0.00299298	0.0170519	FALSE
YES-Control	1164	1.00453	0.00652235	1.01307	0.0187285	1.00145	0.00209122	1.00753	0.0108298	117	0.187193	0.324164	0.489235	0.0348355	FALSE
YES-Control	1165	0.991692	-0.012036	1.00012	0.000170173	0.993961	-0.00873863	1	0	193	5.06013e-06	2.66125e-05	4.57491	0.0185354	FALSE
YES-Control	1166	1.00176	0.00253238	1.01027	0.0147385	1.00422	0.0060769	1.01032	0.0148155	156	0.443197	0.543391	0.264888	0.024348	FALSE
YES-Control	12	0.990001	-0.0144976	0.998413	-0.00229149	0.993961	-0.00873863	1	0	155	0.000667635	0.0023123	2.63596	0.0329758	FALSE
YES-Control	1234	0.956247	-0.0645444	0.964372	-0.0523383	0.991076	-0.0129318	0.997098	-0.00419313	156	1.74122e-10	2.74725e-09	8.5611	0.0795164	FALSE
YES-Control	1249	1.00044	0.000636637	1.00894	0.0128428	1.00144	0.00207971	1.00753	0.0108183	155	0.86782	0.912818	0.0396157	0.0294995	FALSE
YES-Control	1255	0.99733	-0.00385767	1.0058	0.00834846	1.00129	0.0018614	1.00737	0.0106	164	0.361242	0.474966	0.323337	0.0342258	FALSE
YES-Control	130	0.997225	-0.00400892	1.0057	0.00819721	0.997937	-0.00298001	1.004	0.00575862	205	0.245301	0.363516	0.439476	0.0295468	FALSE
YES-Control	1326	1.01546	0.0221314	1.02409	0.0343375	1.01375	0.0197007	1.01991	0.0284393	122	8.04694e-07	5.04967e-06	5.29674	0.0307292	FALSE
YES-Control	1348	0.987078	-0.0187637	0.995465	-0.00655759	0.998217	-0.00257472	1.00428	0.00616391	90	0.063463	0.145351	0.837583	0.0647825	FALSE
YES-Control	1361	1.00256	0.00368907	1.01108	0.0158952	1.00244	0.00351954	1.00853	0.0122582	128	0.286962	0.395618	0.402724	0.023538	FALSE
YES-Control	137	1.00448	0.00645255	1.01302	0.0186587	1.0079	0.0113504	1.01402	0.020089	117	0.134849	0.271744	0.56584	0.0296774	FALSE
YES-Control	1372	0.997304	-0.00389491	1.00578	0.00831122	1.00202	0.00290673	1.0081	0.0116454	78	0.524437	0.625799	0.203565	0.0359655	FALSE
YES-Control	1415	0.990367	-0.0139652	0.998781	-0.00175908	0.993961	-0.00873863	1	0	128	0.00120688	0.00398551	2.39952	0.0303676	FALSE
YES-Control	144	0.987461	-0.0182049	0.995851	-0.00599877	0.9906	-0.0136251	0.996619	-0.00488648	78	3.2351e-06	1.83754e-05	4.73576	0.0201696	FALSE
YES-Control	1443	0.988245	-0.0170589	0.996642	-0.00485273	0.993961	-0.00873863	1	0	134	0.00335246	0.00952098	2.02132	0.0438176	FALSE
YES-Control	145	1.00612	0.00880363	1.01467	0.0210098	1.00331	0.00476911	1.00941	0.0135077	116	0.0579518	0.134904	0.869974	0.0321673	FALSE
YES-Control	1460	0.986825	-0.019134	0.995209	-0.0069279	0.988084	-0.0172944	0.994087	-0.00855573	168	4.8701e-08	4.61037e-07	6.33626	0.0262754	FALSE
YES-Control	1519	0.97744	-0.0329204	0.985745	-0.0207143	0.980254	-0.028773	0.986209	-0.0200344	156	9.63786e-15	2.73715e-13	12.5627	0.0307272	FALSE
YES-Control	1530	1.00434	0.00624235	1.01287	0.0184485	1.00892	0.0128117	1.01505	0.0215504	168	0.206093	0.344296	0.463068	0.0417334	FALSE
YES-Control	1559	0.9969	-0.0044787	1.00537	0.00772743	0.999077	-0.00133169	1.00515	0.00740694	154	0.170281	0.309505	0.509333	0.0236978	FALSE
YES-Control	1562	0.998295	-0.00246151	1.00678	0.00974463	0.99767	-0.00336554	1.00373	0.00537309	153	0.416702	0.523643	0.280965	0.0212288	FALSE
YES-Control	1624	1.0005	0.000718284	1.009	0.0129244	1.0041	0.00590829	1.0102	0.0146469	156	0.814973	0.870122	0.0604199	0.0218996	FALSE
YES-Control	1670	0.986458	-0.0196707	0.994839	-0.0074646	0.990682	-0.013506	0.996701	-0.00476733	203	4.30063e-06	2.3488e-05	4.62915	0.0376359	FALSE
YES-Control	168	0.995809	-0.00605933	1.00427	0.0061468	0.997297	-0.00390548	1.00336	0.00483315	117	0.170336	0.309505	0.509333	0.030394	FALSE
YES-Control	1696	1.01554	0.0222469	1.02417	0.034453	1.01071	0.0153625	1.01685	0.0241011	168	8.17905e-07	5.04967e-06	5.29674	0.0367513	FALSE
YES-Control	175	1.03485	0.0494217	1.04364	0.0616279	1.02363	0.0337003	1.02985	0.0424389	77	7.81033e-08	6.52393e-07	6.18549	0.0511854	FALSE
YES-Control	177	1.0014	0.00201549	1.00991	0.0142216	0.997814	-0.00315734	1.00388	0.00558129	126	0.674962	0.766757	0.115342	0.0350311	FALSE
YES-Control	187	1.00004	5.09126e-05	1.00853	0.012257	0.998691	-0.00188904	1.00476	0.00684959	153	0.986138	0.993132	0.00299298	0.0201965	FALSE
YES-Control	188	0.997156	-0.00410865	1.00563	0.00809748	0.999039	-0.00138767	1.00511	0.00735097	38	0.356044	0.472748	0.32537	0.0173947	FALSE
YES-Control	189	0.95881	-0.0606838	0.966956	-0.0484776	0.959981	-0.0589221	0.965813	-0.0501835	116	3.50813e-17	1.66051e-15	14.7798	0.0442867	FALSE
YES-Control	190	0.995644	-0.00629831	1.0041	0.00590782	0.996204	-0.00548669	1.00226	0.00325194	155	0.0301422	0.0764321	1.11672	0.0198757	FALSE
YES-Control	194	0.996869	-0.00452445	1.00534	0.00768168	0.997388	-0.00377353	1.00345	0.0049651	117	0.154298	0.292137	0.534414	0.0198221	FALSE
YES-Control	230	0.977774	-0.0324263	0.986082	-0.0202202	0.976514	-0.0342879	0.982446	-0.0255493	6	0.202186	0.344296	0.463068	0.0373657	FALSE
YES-Control	239	0.994386	-0.00812204	1.00283	0.00408409	0.997165	-0.00409634	1.00322	0.00464229	116	0.0482911	0.11823	0.927273	0.0276254	FALSE
YES-Control	242	0.983507	-0.0239934	0.991863	-0.0117872	0.989109	-0.0157979	0.995119	-0.00705932	78	4.27172e-07	3.03292e-06	5.51814	0.0250172	FALSE
YES-Control	248	0.990634	-0.0135755	0.999051	-0.00136937	0.993961	-0.00873863	1	0	117	6.76134e-05	0.000287289	3.54168	0.0213076	FALSE
YES-Control	253	1.02303	0.0328551	1.03173	0.0450612	1.00457	0.00658159	1.01068	0.0153202	6	0.479101	0.581473	0.235471	0.0743936	FALSE
YES-Control	254	0.992525	-0.010825	1.00096	0.00138115	0.994134	-0.00848765	1.00017	0.000250978	116	0.00256162	0.00757812	2.12044	0.023018	FALSE
YES-Control	256	0.99205	-0.0115148	1.00048	0.000691315	0.994688	-0.0076837	1.00073	0.00105493	156	2.10861e-05	0.000100392	3.9983	0.0174405	FALSE
YES-Control	26	1.0031	0.00446938	1.01163	0.0166755	1.00489	0.00704045	1.011	0.0157791	78	0.149848	0.287545	0.541294	0.0156828	FALSE
YES-Control	264	0.996004	-0.00577594	1.00447	0.00643019	1.00165	0.00238482	1.00774	0.0111234	12	0.844119	0.894514	0.0484126	0.0692146	FALSE
YES-Control	282	0.986787	-0.0191897	0.995171	-0.00698358	0.993961	-0.00873863	1	0	162	0.00010574	0.000405814	3.39167	0.0399465	FALSE
YES-Control	284	0.980476	-0.0284464	0.988806	-0.0162403	0.982593	-0.0253346	0.988562	-0.016596	83	6.31135e-07	4.26767e-06	5.36981	0.0318581	FALSE
YES-Control	289	0.999682	-0.000459373	1.00818	0.0117468	0.998037	-0.00283509	1.0041	0.00590354	156	0.886388	0.913632	0.0392289	0.0234236	FALSE
YES-Control	29	1.00848	0.0121762	1.01704	0.0243823	0.993961	-0.00873863	1	0	15	0.503581	0.606004	0.217524	0.0480066	FALSE
YES-Control	30	0.996754	-0.00469063	1.00522	0.0075155	1.00272	0.00391405	1.00881	0.0126527	167	0.250877	0.363516	0.439476	0.0331142	FALSE
YES-Control	31	0.983387	-0.0241685	0.991743	-0.0119624	1.00295	0.00425203	1.00905	0.0129907	89	0.0545006	0.128985	0.889461	0.0803075	FALSE
YES-Control	311	1.0262	0.0373091	1.03492	0.0495152	1.004	0.00576113	1.0101	0.0144998	6	0.396754	0.505273	0.296474	0.0698173	FALSE
YES-Control	318	1.02871	0.0408433	1.03746	0.0530494	1.01622	0.0232182	1.0224	0.0319569	3	0.204819	0.344296	0.463068	0.0271062	FALSE
YES-Control	3205	1.01273	0.018255	1.02134	0.0304612	1.01166	0.0167255	1.01781	0.0254641	6	0.549437	0.650167	0.186975	0.0489675	FALSE
YES-Control	323	1.00102	0.00147558	1.00953	0.0136817	1.00206	0.00296648	1.00815	0.0117051	39	0.761235	0.825155	0.0834642	0.0196365	FALSE
YES-Control	335	1.00815	0.0117145	1.01672	0.0239206	1.01061	0.0152271	1.01675	0.0239657	155	0.00174087	0.00561827	2.2504	0.0284551	FALSE
YES-Control	3461	0.991488	-0.0123323	0.999913	-0.00012617	1.00462	0.00665332	1.01073	0.015392	6	0.704087	0.781096	0.107296	0.0521983	FALSE
YES-Control	37	0.995164	-0.00699393	1.00362	0.0052122	0.994181	-0.00842008	1.00022	0.000318551	78	0.11103	0.235318	0.628345	0.0244951	FALSE
YES-Control	377	1.01854	0.0265072	1.0272	0.0387133	1.02249	0.0320927	1.02871	0.0408313	39	8.98972e-08	7.09189e-07	6.14924	0.0173023	FALSE
YES-Control	382	1.00385	0.00554606	1.01238	0.0177522	1.00277	0.00399536	1.00887	0.012734	115	0.135872	0.271744	0.56584	0.0244577	FALSE
YES-Control	383	1.0024	0.00345131	1.01091	0.0156574	1.00029	0.000424249	1.00637	0.00916288	155	0.391059	0.504821	0.296862	0.0314404	FALSE
YES-Control	388	0.993875	-0.00886378	1.00232	0.00334236	1.00456	0.00655729	1.01066	0.0152959	245	0.0679971	0.148547	0.828135	0.049137	FALSE
YES-Control	389	0.993234	-0.00979387	1.00167	0.00241226	0.993961	-0.00873863	1	0	87	0.0517597	0.124574	0.904572	0.0302528	FALSE
YES-Control	394	1.00241	0.00346585	1.01092	0.015672	1.00123	0.00177089	1.00731	0.0105095	162	0.248334	0.363516	0.439476	0.0215859	FALSE
YES-Control	399	0.983513	-0.0239833	0.99187	-0.0117771	0.986365	-0.0198065	0.992358	-0.0110678	117	2.18473e-08	2.4625e-07	6.60862	0.0275973	FALSE
YES-Control	400	0.996158	-0.00555297	1.00462	0.00665316	0.997268	-0.00394732	1.00333	0.00479131	117	0.0924985	0.199012	0.701121	0.0209003	FALSE
YES-Control	401	0.994674	-0.00770457	1.00313	0.00450156	1.00522	0.00750887	1.01133	0.0162475	164	0.171212	0.309505	0.509333	0.0475309	FALSE
YES-Control	402	1.01502	0.0215098	1.02365	0.033716	1.01582	0.0226475	1.02199	0.0313861	117	2.45005e-07	1.83109e-06	5.73729	0.0274257	FALSE
YES-Control	405	0.953645	-0.0684765	0.961747	-0.0562704	0.972077	-0.0408579	0.977983	-0.0321192	6	0.0665204	0.147592	0.830937	0.0489781	FALSE
YES-Control	410	0.998145	-0.00267796	1.00663	0.00952817	0.995266	-0.00684621	1.00131	0.00189242	156	0.398525	0.505273	0.296474	0.0229274	FALSE
YES-Control	412	1.01044	0.0149822	1.01902	0.0271884	1.0108	0.0154953	1.01694	0.024234	77	0.000147922	0.000552762	3.25746	0.0209373	FALSE
YES-Control	414	0.990385	-0.013938	0.9988	-0.00173189	0.993961	-0.00873863	1	0	156	1.34016e-06	7.92926e-06	5.10077	0.0192329	FALSE
YES-Control	421	1.00262	0.00377051	1.01114	0.0159766	1.00428	0.00616685	1.01039	0.0149055	39	0.443897	0.543391	0.264888	0.0199166	FALSE
YES-Control	426	1.01521	0.0217717	1.02383	0.0339778	1.01283	0.0183974	1.01899	0.027136	116	9.20574e-05	0.000363115	3.43996	0.0388218	FALSE
YES-Control	4302	1.03196	0.0453902	1.04073	0.0575963	1.01501	0.0214884	1.02117	0.030227	9	0.126092	0.259494	0.585873	0.0565644	FALSE
YES-Control	4320	0.915556	-0.12728	0.923335	-0.115074	0.992914	-0.0102596	0.998946	-0.00152102	12	0.222846	0.355419	0.44926	0.228308	FALSE
YES-Control	4472	1.01343	0.0192518	1.02204	0.0314579	1.00932	0.0133863	1.01545	0.0221249	9	0.209415	0.34446	0.462862	0.0296251	FALSE
YES-Control	452	1.0034	0.00489623	1.01192	0.0171024	1.004	0.00576308	1.0101	0.0145017	155	0.180345	0.316161	0.500091	0.0278091	FALSE
YES-Control	46	0.993384	-0.00957599	1.00182	0.00263015	0.996818	-0.00459822	1.00287	0.00414041	162	0.0264841	0.0683771	1.16509	0.0346243	FALSE
YES-Control	463	0.976561	-0.0342178	0.984858	-0.0220117	0.993944	-0.00876295	0.999983	-2.43238e-05	195	2.2544e-08	2.4625e-07	6.60862	0.0543447	FALSE
YES-Control	475	0.991156	-0.0128156	0.999578	-0.000609514	0.993961	-0.00873863	1	0	116	0.000583513	0.00207147	2.68372	0.0240339	FALSE
YES-Control	5036	1.02315	0.033021	1.03185	0.0452271	1.01514	0.0216833	1.02131	0.0304219	9	0.356226	0.472748	0.32537	0.0714728	FALSE
YES-Control	5040	0.986537	-0.0195543	0.99492	-0.00734821	0.992926	-0.0102417	0.998959	-0.00150312	9	0.424435	0.528683	0.276805	0.0482834	FALSE
YES-Control	5041	0.998057	-0.00280538	1.00654	0.00940075	1.01173	0.0168187	1.01787	0.0255573	12	0.877283	0.913632	0.0392289	0.0427472	FALSE
YES-Control	507	0.997456	-0.00367541	1.00593	0.00853073	0.99801	-0.00287367	1.00407	0.00586496	155	0.224304	0.355419	0.44926	0.0212679	FALSE
YES-Control	51	0.981606	-0.0267842	0.989946	-0.0145781	0.982429	-0.0255745	0.988398	-0.0168359	78	2.6253e-08	2.66281e-07	6.57466	0.0250244	FALSE
YES-Control	515	0.99898	-0.00147247	1.00747	0.0107337	0.997252	-0.0039694	1.00331	0.00476923	125	0.750137	0.819381	0.0865143	0.0333132	FALSE
YES-Control	524	0.986045	-0.020274	0.994423	-0.00806783	0.993619	-0.00923468	0.999656	-0.000496046	77	1.3677e-05	6.93621e-05	4.15888	0.0248237	FALSE
YES-Control	5296	1.04364	0.0616238	1.05251	0.0738299	1.03361	0.0476985	1.03989	0.0564371	6	0.172189	0.309505	0.509333	0.0676787	FALSE
YES-Control	534	0.990569	-0.0136713	0.998985	-0.00146517	0.993942	-0.00876582	0.999981	-2.71877e-05	161	6.52892e-05	0.000287289	3.54168	0.0253406	FALSE
YES-Control	538	0.99477	-0.00756536	1.00322	0.00464077	1.00277	0.00399075	1.00886	0.0127294	167	0.267385	0.379687	0.420574	0.0591648	FALSE
YES-Control	539	0.990774	-0.0133722	0.999192	-0.00116605	0.993961	-0.00873863	1	0	168	6.87876e-05	0.000287289	3.54168	0.0252482	FALSE
YES-Control	549	1.02805	0.0399114	1.03679	0.0521175	1.01557	0.022295	1.02174	0.0310336	9	0.211042	0.34446	0.462862	0.0623497	FALSE
YES-Control	59	1.00371	0.00534306	1.01224	0.0175492	1.00125	0.00179928	1.00733	0.0105379	154	0.140328	0.276758	0.5579	0.0274017	FALSE
YES-Control	5916	0.990398	-0.0139195	0.998813	-0.00171336	0.982394	-0.0256263	0.988363	-0.0168876	6	0.592489	0.689618	0.161391	0.041434	FALSE
YES-Control	601	0.991849	-0.0118071	1.00028	0.00039908	1.00381	0.00548649	1.00991	0.0142251	89	0.238316	0.363516	0.439476	0.0642961	FALSE
YES-Control	603	0.995494	-0.00651529	1.00395	0.00569084	1.00774	0.0111182	1.01386	0.0198568	12	0.724279	0.797268	0.0983957	0.0433067	FALSE
YES-Control	628	0.980994	-0.0276844	0.989329	-0.0154783	0.988115	-0.0172488	0.994119	-0.00851013	117	1.38412e-14	3.27574e-13	12.4847	0.0212548	FALSE
YES-Control	6379	0.921271	-0.118303	0.929099	-0.106096	1.00032	0.000457677	1.00639	0.00919631	9	0.246133	0.363516	0.439476	0.190314	FALSE
YES-Control	650	0.981425	-0.0270505	0.989763	-0.0148444	0.993961	-0.00873863	1	0	84	0.0466579	0.116235	0.934662	0.0843046	FALSE
YES-Control	6596	0.995417	-0.00662685	1.00387	0.00557928	0.996138	-0.005583	1.00219	0.00315563	6	0.617429	0.712804	0.14703	0.0211139	FALSE
YES-Control	7	1.02676	0.0380929	1.03548	0.0502991	1.03913	0.0553708	1.04544	0.0641094	6	0.382871	0.498786	0.302086	0.0690789	FALSE
YES-Control	720	1.00136	0.00196167	1.00987	0.0141678	1.00313	0.00450677	1.00922	0.0132454	76	0.686518	0.773695	0.11143	0.0275249	FALSE
YES-Control	737	0.984834	-0.0220475	0.993202	-0.00984132	0.987464	-0.0182001	0.993463	-0.00946145	161	1.02163e-10	1.81339e-09	8.74151	0.0243792	FALSE
YES-Control	738	0.997061	-0.00424596	1.00553	0.00796018	0.99728	-0.00392971	1.00334	0.00480893	156	0.242341	0.363516	0.439476	0.0275699	FALSE
YES-Control	745	0.984889	-0.0219669	0.993257	-0.00976074	0.989114	-0.0157913	0.995123	-0.00705265	156	3.54345e-09	4.57427e-08	7.33968	0.027067	FALSE
YES-Control	7506	1.02327	0.0331891	1.03197	0.0453952	1.01421	0.0203591	1.02037	0.0290977	6	0.278353	0.388021	0.411144	0.0472366	FALSE
YES-Control	7507	1.0009	0.00130115	1.00941	0.0135073	1.00446	0.00641716	1.01056	0.0151558	12	0.951678	0.972218	0.0122365	0.0506811	FALSE
YES-Control	767	0.994657	-0.00772827	1.00311	0.00447786	0.995326	-0.00675825	1.00137	0.00198038	156	0.00480922	0.0133904	1.87321	0.0180452	FALSE
YES-Control	7767	1.00193	0.00278726	1.01045	0.0149934	1.00478	0.006879	1.01088	0.0156176	15	0.887896	0.913632	0.0392289	0.0524138	FALSE
YES-Control	778	1.00482	0.00693024	1.01335	0.0191364	1.00777	0.0111686	1.01389	0.0199073	167	0.119839	0.250253	0.601621	0.0368947	FALSE
YES-Control	780	0.989436	-0.0153213	0.997843	-0.00311513	0.99562	-0.00633256	1.00167	0.00240607	244	0.00253517	0.00757812	2.12044	0.0511626	FALSE
YES-Control	781	0.979209	-0.0303116	0.987529	-0.0181054	0.990288	-0.0140793	0.996305	-0.00534067	239	6.20469e-13	1.25867e-11	10.9001	0.0389717	FALSE
YES-Control	784	0.981546	-0.0268716	0.989886	-0.0146655	0.993542	-0.0093471	0.999578	-0.000608465	51	0.0155419	0.0416405	1.38048	0.0524171	FALSE
YES-Control	79	0.993556	-0.00932715	1.002	0.00287898	0.999969	-4.43588e-05	1.00604	0.00869427	155	0.0232294	0.0610846	1.21407	0.0319022	FALSE
YES-Control	808	0.998168	-0.00264606	1.00665	0.00956007	0.99834	-0.00239628	1.00441	0.00634235	126	0.584017	0.685375	0.164071	0.0351811	FALSE
YES-Control	819	0.99803	-0.00284472	1.00651	0.00936141	0.993961	-0.00873863	1	0	115	0.629738	0.721152	0.141973	0.0420567	FALSE
YES-Control	86	1.00264	0.00380721	1.01116	0.0160133	1.00003	4.34963e-05	1.00611	0.00878213	156	0.244754	0.363516	0.439476	0.0240371	FALSE
YES-Control	87	0.984187	-0.0229958	0.992549	-0.0107897	0.986609	-0.0194493	0.992603	-0.0107106	115	2.12095e-05	0.000100392	3.9983	0.0365863	FALSE
YES-Control	90	1.00282	0.00405692	1.01134	0.0162631	1.00537	0.00772914	1.01148	0.0164678	168	0.304465	0.411753	0.385363	0.0319948	FALSE
YES-Control	900	0.985807	-0.0206223	0.994183	-0.00841621	0.993961	-0.00873863	1	0	166	0.000225372	0.000820584	3.08588	0.0464578	FALSE
YES-Control	917	0.996373	-0.00524154	1.00484	0.0069646	0.999501	-0.000719764	1.00557	0.00801887	78	0.258007	0.370071	0.431715	0.0262263	FALSE
YES-Control	93	0.990965	-0.0130935	0.999385	-0.000887401	0.989812	-0.0147741	0.995825	-0.00603551	78	0.00194891	0.00614988	2.21113	0.022917	FALSE
YES-Control	934	0.989939	-0.0145887	0.99835	-0.00238257	1.00971	0.0139433	1.01585	0.022682	98	0.225265	0.355419	0.44926	0.0814159	FALSE
YES-Control	942	1.00256	0.00368141	1.01107	0.0158875	1.00072	0.00104534	1.0068	0.00978397	78	0.27872	0.388021	0.411144	0.0178643	FALSE
YES-Control	965	0.949088	-0.0753858	0.957152	-0.0631797	0.983352	-0.0242207	0.989326	-0.015482	51	0.00307859	0.00892164	2.04956	0.117602	FALSE
YES-Control	972_control	1	0	1.0085	0.0122061	1	0	1.00608	0.00873863	594	1	1	0	0.0300896	FALSE
YES-Control	974	1.00452	0.00651069	1.01306	0.0187168	1.00887	0.012737	1.015	0.0214756	205	0.1438	0.279721	0.553275	0.0408988	FALSE
YES-Control	993	0.96665	-0.0489347	0.974863	-0.0367286	0.97989	-0.0293087	0.985843	-0.0205701	9	0.00703626	0.0192144	1.71637	0.0281289	FALSE
YES-Control	996	0.991663	-0.0120786	1.00009	0.000127518	0.993496	-0.00941409	0.999532	-0.000675455	39	0.000912676	0.00308571	2.51064	0.0130367	FALSE
YESphlox-Control	1	0.928999	-0.106252	0.939003	-0.0907984	1.00874	0.0125542	1.01641	0.0234808	220	8.81756e-10	1.04341e-08	7.98154	0.165288	FALSE
YESphlox-Control	103	0.990869	-0.0132342	1.00154	0.00221913	0.99611	-0.00562325	1.00368	0.00530327	245	0.000571833	0.00180445	2.74366	0.0371281	FALSE
YESphlox-Control	1039	0.991516	-0.0122916	1.00219	0.00316172	0.99498	-0.00726076	1.00254	0.00366576	330	0.00153509	0.00375832	2.42501	0.0438064	FALSE
YESphlox-Control	1064	1.00456	0.00656726	1.01538	0.0220206	1.00519	0.00746354	1.01283	0.0183901	328	0.0299184	0.0559001	1.25259	0.0316843	FALSE
YESphlox-Control	1088	0.990274	-0.0141005	1.00094	0.00135283	0.993446	-0.00948647	1.001	0.00144005	216	7.16743e-06	3.39258e-05	4.46947	0.0264861	FALSE
YESphlox-Control	1097	0.983999	-0.0232716	0.994595	-0.0078183	0.992455	-0.0109265	1	0	64	0.00448613	0.0102747	1.98823	0.0429935	FALSE
YESphlox-Control	1122	0.999224	-0.00111935	1.00999	0.014334	1.00086	0.00124688	1.00847	0.0121734	251	0.734134	0.808116	0.0925262	0.0312472	FALSE
YESphlox-Control	1125	1.00264	0.00380206	1.01344	0.0192554	1.00399	0.00574325	1.01162	0.0166698	219	0.293531	0.371621	0.4299	0.0330835	FALSE
YESphlox-Control	1130	1.01037	0.0148841	1.02125	0.0303375	1.01036	0.014873	1.01804	0.0257995	220	2.43218e-05	0.000104658	3.98023	0.031741	FALSE
YESphlox-Control	115	0.984247	-0.0229078	0.994846	-0.00745446	0.992455	-0.0109265	1	0	218	2.07973e-07	1.47661e-06	5.83074	0.0405652	FALSE
YESphlox-Control	1154	0.999984	-2.28466e-05	1.01075	0.0154305	0.999793	-0.000298624	1.00739	0.0106279	220	0.995124	1	0	0.0345281	FALSE
YESphlox-Control	1164	1.01321	0.0189348	1.02412	0.0343881	1.00944	0.0135536	1.01711	0.0244801	164	0.00126193	0.00331842	2.47907	0.0499629	FALSE
YESphlox-Control	1165	0.989669	-0.0149826	1.00033	0.000470774	0.992455	-0.0109265	1	0	274	5.69932e-06	2.7907e-05	4.55429	0.0320642	FALSE
YESphlox-Control	1166	0.999437	-0.000811945	1.0102	0.0146414	1.0008	0.00115746	1.00841	0.012084	218	0.789101	0.847408	0.0719072	0.025929	FALSE
YESphlox-Control	12	0.990019	-0.0144719	1.00068	0.000981424	0.992455	-0.0109265	1	0	219	1.47942e-06	9.13383e-06	5.03935	0.0249711	FALSE
YESphlox-Control	1234	0.956455	-0.064231	0.966755	-0.0487776	0.980838	-0.0279134	0.988295	-0.0169868	217	2.47387e-15	4.39112e-14	13.3574	0.0745033	FALSE
YESphlox-Control	1249	0.998124	-0.00270924	1.00887	0.0127441	0.998843	-0.0016703	1.00644	0.00925622	219	0.342637	0.423082	0.373575	0.0236528	FALSE
YESphlox-Control	1255	0.996929	-0.00443737	1.00766	0.011016	0.999844	-0.000224425	1.00745	0.0107021	268	0.249604	0.33125	0.479844	0.039485	FALSE
YESphlox-Control	130	0.995858	-0.00598814	1.00658	0.00946521	0.997125	-0.00415371	1.00471	0.00677281	336	0.0912737	0.137882	0.860494	0.0397135	FALSE
YESphlox-Control	1326	1.01004	0.014418	1.02092	0.0298714	1.00934	0.0134078	1.01701	0.0243343	195	0.0014267	0.00355423	2.44925	0.0406851	FALSE
YESphlox-Control	1348	0.98831	-0.0169644	0.998953	-0.0015111	0.993922	-0.00879489	1.00148	0.00213163	174	0.000485017	0.00156528	2.80541	0.0411011	FALSE
YESphlox-Control	1361	1.00259	0.00372598	1.01338	0.0191793	1.00519	0.00746761	1.01283	0.0183941	229	0.277782	0.361881	0.441434	0.0315731	FALSE
YESphlox-Control	137	0.996822	-0.00459187	1.00756	0.0108615	1.00103	0.00148015	1.00864	0.0124067	164	0.193789	0.267165	0.573221	0.0276119	FALSE
YESphlox-Control	1372	1.00113	0.00163403	1.01191	0.0170874	1.00621	0.00893193	1.01386	0.0198584	109	0.614953	0.704221	0.152291	0.020187	FALSE
YESphlox-Control	1415	0.98375	-0.0236369	0.994344	-0.00818358	0.991611	-0.0121538	0.99915	-0.00122733	229	6.54677e-09	6.64029e-08	7.17781	0.0376269	FALSE
YESphlox-Control	144	0.994024	-0.00864746	1.00473	0.00680589	0.996949	-0.00440815	1.00453	0.00651837	109	0.0421778	0.0713006	1.14691	0.0281329	FALSE
YESphlox-Control	1443	0.988926	-0.0160658	0.999576	-0.000612504	0.992455	-0.0109265	1	0	256	7.43711e-06	3.40668e-05	4.46767	0.0345237	FALSE
YESphlox-Control	145	1.00308	0.00444347	1.01389	0.0198968	1.00337	0.00485025	1.011	0.0157768	165	0.282625	0.364843	0.437894	0.0338681	FALSE
YESphlox-Control	1460	0.989911	-0.014629	1.00057	0.000824324	0.990494	-0.0137796	0.998024	-0.00285309	284	4.46087e-06	2.4005e-05	4.6197	0.0311087	FALSE
YESphlox-Control	1519	0.974251	-0.0376346	0.984743	-0.0221812	0.979405	-0.030022	0.986851	-0.0190955	218	8.53496e-28	4.03988e-26	25.3936	0.0274671	FALSE
YESphlox-Control	1530	0.997291	-0.0039135	1.00803	0.0115398	1.001	0.0014447	1.00861	0.0123712	283	0.248198	0.33125	0.479844	0.0343867	FALSE
YESphlox-Control	1559	0.992749	-0.0104993	1.00344	0.00495408	0.993272	-0.00973904	1.00082	0.00118748	218	0.00120695	0.00326002	2.48678	0.028103	FALSE
YESphlox-Control	1562	1.00039	0.000560382	1.01116	0.0160137	0.998485	-0.0021867	1.00608	0.00873982	219	0.861886	0.89991	0.045801	0.0283008	FALSE
YESphlox-Control	1624	0.992813	-0.0104061	1.0035	0.00504722	0.995225	-0.0069051	1.00279	0.00402142	219	6.91809e-05	0.00027288	3.56403	0.020157	FALSE
YESphlox-Control	1670	0.980912	-0.0278043	0.991476	-0.012351	0.995665	-0.00626728	1.00323	0.00465924	339	3.30437e-10	4.26564e-09	8.37002	0.0507469	FALSE
YESphlox-Control	168	0.996021	-0.0057517	1.00675	0.00970165	0.995329	-0.00675439	1.0029	0.00417213	165	0.16624	0.238445	0.622613	0.0338788	FALSE
YESphlox-Control	1696	1.00865	0.0124281	1.01951	0.0278815	1.00764	0.0109798	1.0153	0.0219063	283	0.00115596	0.00321855	2.49234	0.0402153	FALSE
YESphlox-Control	175	1.02513	0.035805	1.03617	0.0512584	1.0201	0.0287039	1.02785	0.0396304	108	1.68466e-07	1.25906e-06	5.89995	0.045925	FALSE
YESphlox-Control	177	0.995814	-0.00605163	1.00654	0.00940171	0.997984	-0.00291088	1.00557	0.00801564	213	0.0571862	0.0944238	1.02492	0.0272639	FALSE
YESphlox-Control	187	0.997757	-0.00323901	1.0085	0.0122143	0.997803	-0.00317257	1.00539	0.00775395	219	0.289866	0.370819	0.430838	0.0262422	FALSE
YESphlox-Control	188	1.00099	0.00143303	1.01177	0.0168864	0.998802	-0.00173003	1.00639	0.00919649	55	0.844335	0.892492	0.0493958	0.0367208	FALSE
YESphlox-Control	190	0.995848	-0.00600287	1.00657	0.00945048	0.996118	-0.00561214	1.00369	0.00531438	218	0.0362805	0.0620703	1.20712	0.0236464	FALSE
YESphlox-Control	194	0.99496	-0.00728917	1.00568	0.00816417	0.997428	-0.00371606	1.00501	0.00721046	164	0.0239082	0.0458779	1.3384	0.0243172	FALSE
YESphlox-Control	230	0.998484	-0.00218887	1.00924	0.0132645	1.00388	0.00559043	1.01151	0.0165169	32	0.77825	0.845143	0.0730698	0.0297823	FALSE
YESphlox-Control	239	0.998879	-0.0016187	1.00964	0.0138346	0.999261	-0.00106617	1.00686	0.00986035	165	0.611479	0.704221	0.152291	0.024161	FALSE
YESphlox-Control	242	0.982715	-0.0251549	0.993298	-0.0097016	0.989609	-0.0150689	0.997133	-0.00414239	110	1.17372e-08	1.11112e-07	6.95424	0.0277232	FALSE
YESphlox-Control	248	0.990683	-0.0135044	1.00135	0.00194891	0.992654	-0.0106368	1.0002	0.000289749	165	0.000994534	0.00288212	2.54029	0.0328815	FALSE
YESphlox-Control	253	1.01709	0.0244411	1.02804	0.0398945	1.00864	0.012408	1.01631	0.0233345	32	0.0748233	0.116757	0.932716	0.0526165	FALSE
YESphlox-Control	254	0.985126	-0.0216202	0.995735	-0.00616682	0.992455	-0.0109265	1	0	162	4.70228e-08	3.70958e-07	6.43068	0.0303496	FALSE
YESphlox-Control	256	0.991178	-0.0127843	1.00185	0.002669	0.995876	-0.0059618	1.00345	0.00496472	220	0.00072159	0.00218012	2.66152	0.0344656	FALSE
YESphlox-Control	26	0.999199	-0.00115677	1.00996	0.0142966	1.00258	0.00372437	1.01021	0.0146509	109	0.72855	0.808116	0.0925262	0.0208866	FALSE
YESphlox-Control	264	0.99113	-0.0128539	1.0018	0.00259949	0.995955	-0.00584706	1.00353	0.00507946	64	0.0709991	0.113279	0.945849	0.037944	FALSE
YESphlox-Control	282	0.987868	-0.0176099	0.998506	-0.00215658	0.992455	-0.0109265	1	0	250	0.000256253	0.00086638	3.06229	0.0489238	FALSE
YESphlox-Control	284	0.987982	-0.0174438	0.998621	-0.00199049	0.982559	-0.0253835	0.990029	-0.014457	142	0.00348624	0.00811551	2.09068	0.0467258	FALSE
YESphlox-Control	289	0.993192	-0.0098551	1.00389	0.00559824	0.994691	-0.00767968	1.00225	0.00324684	219	0.00111496	0.00316649	2.49942	0.0254947	FALSE
YESphlox-Control	29	0.999524	-0.00068655	1.01029	0.0147668	0.99733	-0.00385756	1.00491	0.00706896	79	0.886746	0.912898	0.0395777	0.0279841	FALSE
YESphlox-Control	30	0.996963	-0.00438762	1.0077	0.0110657	1.00025	0.000359851	1.00785	0.0112864	283	0.176849	0.246202	0.608709	0.0324467	FALSE
YESphlox-Control	31	0.995835	-0.00602184	1.00656	0.00943151	1.00515	0.00741531	1.01279	0.0183418	174	0.31652	0.394262	0.404215	0.053011	FALSE
YESphlox-Control	311	1.02167	0.0309227	1.03267	0.046376	1.01792	0.0256205	1.02566	0.036547	31	0.031464	0.0580245	1.23639	0.0536947	FALSE
YESphlox-Control	318	0.997287	-0.00391893	1.00803	0.0115344	0.988632	-0.0164952	0.996148	-0.00556867	16	0.848496	0.892492	0.0493958	0.0562383	FALSE
YESphlox-Control	3205	0.997234	-0.00399547	1.00797	0.0114579	0.995905	-0.00591951	1.00348	0.005007	32	0.793699	0.847408	0.0719072	0.0595796	FALSE
YESphlox-Control	323	0.98898	-0.0159867	0.99963	-0.000533373	0.991937	-0.0116791	0.999479	-0.000752547	55	0.000218376	0.000756325	3.12129	0.0193771	FALSE
YESphlox-Control	335	0.99718	-0.00407346	1.00792	0.0113799	0.999457	-0.000783275	1.00706	0.0101432	216	0.221422	0.299447	0.523679	0.0293336	FALSE
YESphlox-Control	3461	0.986798	-0.0191726	0.997425	-0.00371926	0.999417	-0.000840967	1.00702	0.0100856	32	0.156411	0.226637	0.64467	0.0515693	FALSE
YESphlox-Control	37	0.9834	-0.0241495	0.99399	-0.00869617	0.9897	-0.0149369	0.997224	-0.00401039	108	3.05494e-09	3.33693e-08	7.47665	0.0248895	FALSE
YESphlox-Control	377	1.00392	0.0056387	1.01473	0.021092	1.00267	0.00385391	1.0103	0.0147804	55	0.295726	0.371621	0.4299	0.0264035	FALSE
YESphlox-Control	382	1.00496	0.00713236	1.01578	0.0225857	1.00605	0.00869879	1.0137	0.0196253	165	0.0564188	0.0942525	1.02571	0.0298551	FALSE
YESphlox-Control	383	0.994198	-0.00839504	1.0049	0.0070583	0.995454	-0.00657365	1.00302	0.00435287	219	0.09561	0.141423	0.84948	0.0487879	FALSE
YESphlox-Control	388	0.9989	-0.00158838	1.00966	0.013865	1.00535	0.00769502	1.01299	0.0186215	393	0.63488	0.721223	0.14193	0.0398944	FALSE
YESphlox-Control	389	0.99422	-0.00836298	1.00493	0.00709036	0.994533	-0.00790895	1.00209	0.00301757	156	0.0236221	0.0458779	1.3384	0.0283474	FALSE
YESphlox-Control	394	1.0035	0.00503703	1.0143	0.0204904	1.00248	0.00357661	1.0101	0.0145031	252	0.172065	0.241913	0.616341	0.0363607	FALSE
YESphlox-Control	399	0.98504	-0.0217463	0.995648	-0.00629298	0.988708	-0.0163838	0.996224	-0.00545729	163	6.59561e-07	4.25717e-06	5.37088	0.0345123	FALSE
YESphlox-Control	400	0.994708	-0.00765557	1.00542	0.00779777	0.995794	-0.00608144	1.00336	0.00484508	164	0.0357	0.0618219	1.20886	0.0286069	FALSE
YESphlox-Control	401	1.0049	0.00705833	1.01573	0.0225117	1.00922	0.0132369	1.01689	0.0241634	282	0.0340269	0.0605497	1.21789	0.0336188	FALSE
YESphlox-Control	402	1.01138	0.0163254	1.02227	0.0317788	1.01392	0.0199491	1.02163	0.0308756	165	3.38486e-05	0.000137329	3.86224	0.0314353	FALSE
YESphlox-Control	405	0.998829	-0.00168978	1.00959	0.0137636	0.993748	-0.00904761	1.0013	0.00187891	32	0.893611	0.912898	0.0395777	0.0491899	FALSE
YESphlox-Control	410	0.993973	-0.00872186	1.00468	0.00673149	0.995594	-0.00637103	1.00316	0.00455549	220	0.00574624	0.0127495	1.89451	0.02729	FALSE
YESphlox-Control	412	1.00639	0.00918853	1.01723	0.0246419	1.00527	0.00757593	1.01291	0.0185025	110	0.0166433	0.0337622	1.47157	0.0250385	FALSE
YESphlox-Control	414	0.988097	-0.0172756	0.998738	-0.0018223	0.991926	-0.0116959	0.999467	-0.000769382	218	1.62139e-08	1.43898e-07	6.84194	0.0253323	FALSE
YESphlox-Control	421	1.01087	0.0156012	1.02176	0.0310546	1.00901	0.0129358	1.01668	0.0238623	54	0.00128588	0.0033199	2.47888	0.0224174	FALSE
YESphlox-Control	426	1.00448	0.00644468	1.01529	0.021898	1.00516	0.00742432	1.0128	0.0183508	165	0.0346412	0.0607291	1.2166	0.022691	FALSE
YESphlox-Control	4302	1.02491	0.0354967	1.03595	0.05095	1.02081	0.0297173	1.02857	0.0406438	48	0.00139566	0.00353899	2.45112	0.0508448	FALSE
YESphlox-Control	4320	0.978779	-0.0309446	0.98932	-0.0154913	0.994499	-0.00795832	1.00206	0.0029682	64	0.0638596	0.104231	0.982005	0.0904979	FALSE
YESphlox-Control	4472	1.00384	0.00552723	1.01465	0.0209806	1.01327	0.0190196	1.02097	0.0299461	47	0.674393	0.754045	0.122603	0.0623847	FALSE
YESphlox-Control	452	1.00262	0.00377787	1.01342	0.0192312	1.00457	0.00657977	1.01221	0.0175063	220	0.196918	0.268868	0.57046	0.0247105	FALSE
YESphlox-Control	46	0.9899	-0.0146455	1.00056	0.000807862	0.992455	-0.0109265	1	0	268	1.79685e-05	7.97351e-05	4.09835	0.0332232	FALSE
YESphlox-Control	463	0.973658	-0.0385124	0.984144	-0.023059	0.992257	-0.0112141	0.999801	-0.000287606	273	5.50155e-11	7.8122e-10	9.10723	0.0617822	FALSE
YESphlox-Control	475	0.994167	-0.00843947	1.00487	0.00701388	0.998642	-0.00196064	1.00623	0.00896588	165	0.0217672	0.0435345	1.36117	0.0289908	FALSE
YESphlox-Control	5036	1.01627	0.0232802	1.02721	0.0387336	1.01159	0.0166181	1.01928	0.0275446	48	0.0769477	0.118767	0.925304	0.062496	FALSE
YESphlox-Control	5040	1.01915	0.0273596	1.03012	0.042813	1.0187	0.0267255	1.02644	0.037652	48	0.0116021	0.024962	1.60272	0.0504718	FALSE
YESphlox-Control	5041	1.01435	0.0205522	1.02527	0.0360055	1.01444	0.0206895	1.02216	0.031616	63	0.025265	0.0478352	1.32025	0.0493865	FALSE
YESphlox-Control	507	0.995366	-0.00670078	1.00609	0.00875256	0.994722	-0.00763502	1.00228	0.0032915	220	0.0341125	0.0605497	1.21789	0.0274467	FALSE
YESphlox-Control	51	0.983993	-0.0232802	0.99459	-0.00782688	0.989718	-0.0149112	0.997242	-0.00398471	109	2.20732e-06	1.25376e-05	4.90179	0.0318777	FALSE
YESphlox-Control	515	0.989326	-0.0154823	0.99998	-2.89813e-05	0.996148	-0.0055683	1.00372	0.00535822	229	2.68904e-05	0.000112307	3.94959	0.0338646	FALSE
YESphlox-Control	524	0.984674	-0.0222826	0.995277	-0.0068293	0.988382	-0.0168598	0.995896	-0.00593328	108	3.61688e-07	2.4457e-06	5.6116	0.0275982	FALSE
YESphlox-Control	5296	1.01711	0.0244807	1.02807	0.0399341	1.03069	0.0436041	1.03852	0.0545306	32	0.103502	0.151518	0.819536	0.0579854	FALSE
YESphlox-Control	534	0.992799	-0.0104265	1.00349	0.00502682	0.995861	-0.00598346	1.00343	0.00494306	267	0.0100539	0.0219639	1.65829	0.0416192	FALSE
YESphlox-Control	538	0.99034	-0.0140046	1.001	0.00144876	0.994114	-0.0085174	1.00167	0.00240912	284	0.00308445	0.00729987	2.13668	0.0514344	FALSE
YESphlox-Control	539	0.993482	-0.00943412	1.00418	0.00601923	0.993064	-0.0100407	1.00061	0.000885848	284	0.00121677	0.00326002	2.48678	0.0275768	FALSE
YESphlox-Control	549	1.02192	0.0312769	1.03292	0.0467302	1.01695	0.0242448	1.02468	0.0351714	48	0.000144116	0.000533128	3.27317	0.0364745	FALSE
YESphlox-Control	59	0.995788	-0.00608972	1.00651	0.00936362	0.996398	-0.00520556	1.00397	0.00572096	214	0.0745156	0.116757	0.932716	0.0301081	FALSE
YESphlox-Control	5916	1.00728	0.0104582	1.01812	0.0259115	1.00851	0.0122187	1.01617	0.0231452	32	0.369729	0.448731	0.348014	0.0452278	FALSE
YESphlox-Control	601	0.987321	-0.0184096	0.997953	-0.00295626	0.996798	-0.00462623	1.00438	0.00630029	173	0.00456089	0.0102801	1.988	0.0566086	FALSE
YESphlox-Control	603	0.992747	-0.0105023	1.00344	0.00495103	0.996558	-0.00497401	1.00413	0.00595251	64	0.429787	0.508582	0.293639	0.0731977	FALSE
YESphlox-Control	628	0.974578	-0.0371509	0.985073	-0.0216976	0.983296	-0.0243016	0.990772	-0.0133751	165	5.30827e-16	1.07682e-14	13.9679	0.0345951	FALSE
YESphlox-Control	6379	1.00309	0.0044559	1.0139	0.0199092	1.00159	0.00229367	1.00921	0.0132202	48	0.779674	0.845143	0.0730698	0.076556	FALSE
YESphlox-Control	650	0.991601	-0.0121676	1.00228	0.0032857	0.99454	-0.00789887	1.0021	0.00302765	142	0.069512	0.112167	0.950135	0.0534948	FALSE
YESphlox-Control	6596	1.01907	0.0272461	1.03004	0.0426995	1.02056	0.0293653	1.02832	0.0402918	31	0.0335205	0.0605497	1.21789	0.0477801	FALSE
YESphlox-Control	7	1.0241	0.0343568	1.03513	0.0498102	1.02346	0.0334477	1.03124	0.0443742	32	0.0147969	0.0304516	1.51639	0.0530538	FALSE
YESphlox-Control	720	1.00441	0.00634505	1.01522	0.0217984	1.00428	0.00615639	1.01191	0.0170829	106	0.17135	0.241913	0.616341	0.0310049	FALSE
YESphlox-Control	737	0.987006	-0.0188692	0.997635	-0.00341587	0.989159	-0.0157259	0.996679	-0.00479939	252	3.85892e-08	3.22333e-07	6.49169	0.0320584	FALSE
YESphlox-Control	738	0.991322	-0.0125744	1.002	0.00287895	0.994396	-0.00810761	1.00196	0.00281891	218	0.000106567	0.000408988	3.38829	0.0279861	FALSE
YESphlox-Control	745	0.988538	-0.016632	0.999183	-0.00117866	0.991595	-0.0121772	0.999134	-0.00125063	220	0.000146422	0.000533128	3.27317	0.0410142	FALSE
YESphlox-Control	7506	1.0126	0.0180606	1.0235	0.0335139	1.00241	0.00347941	1.01004	0.0144059	32	0.275799	0.361881	0.441434	0.0645988	FALSE
YESphlox-Control	7507	1.01108	0.0158918	1.02196	0.0313452	1.01167	0.0167377	1.01936	0.0276643	64	0.0903732	0.137882	0.860494	0.0512453	FALSE
YESphlox-Control	767	0.994593	-0.00782221	1.0053	0.00763113	0.99852	-0.00213714	1.00611	0.00878938	219	0.0237449	0.0458779	1.3384	0.030913	FALSE
YESphlox-Control	7767	0.999814	-0.000268615	1.01058	0.0151847	1.00671	0.00965413	1.01437	0.0205806	80	0.977136	0.991095	0.00388467	0.057568	FALSE
YESphlox-Control	778	0.998032	-0.00284178	1.00878	0.0126116	1.0006	0.000867857	1.00821	0.0117944	284	0.393056	0.469025	0.328804	0.0336332	FALSE
YESphlox-Control	780	0.992836	-0.0103727	1.00353	0.00508059	0.997684	-0.0033454	1.00527	0.00758112	392	0.00258468	0.00622075	2.20616	0.0410568	FALSE
YESphlox-Control	781	0.97217	-0.0407188	0.98264	-0.0252654	0.983495	-0.0240106	0.990972	-0.013084	360	1.40492e-23	3.98997e-22	21.399	0.0455345	FALSE
YESphlox-Control	784	0.981802	-0.0264963	0.992375	-0.011043	0.992455	-0.0109265	1	0	119	0.000158664	0.000563256	3.24929	0.0499462	FALSE
YESphlox-Control	79	0.997952	-0.00295751	1.0087	0.0124958	1.00294	0.00423725	1.01057	0.0151638	219	0.355938	0.435717	0.360795	0.0280221	FALSE
YESphlox-Control	808	0.994628	-0.00777069	1.00534	0.00768266	0.998052	-0.00281315	1.00564	0.00811337	210	0.0146656	0.0304516	1.51639	0.0270165	FALSE
YESphlox-Control	819	0.989317	-0.0154955	0.999971	-4.21082e-05	0.992455	-0.0109265	1	0	165	1.72135e-06	1.01846e-05	4.99205	0.0239446	FALSE
YESphlox-Control	86	0.996453	-0.00512676	1.00718	0.0103266	1.00034	0.00048324	1.00794	0.0114098	220	0.0942985	0.140951	0.85093	0.0262895	FALSE
YESphlox-Control	87	0.987017	-0.0188535	0.997646	-0.00340019	0.989907	-0.0146348	0.997433	-0.00370826	165	4.78015e-06	2.42422e-05	4.61543	0.032581	FALSE
YESphlox-Control	90	0.997987	-0.00290705	1.00873	0.0125463	1.00119	0.00172076	1.0088	0.0126473	284	0.389664	0.468917	0.328904	0.0343454	FALSE
YESphlox-Control	900	0.992667	-0.0106179	1.00336	0.00483549	0.992468	-0.010907	1.00001	1.95365e-05	284	0.000967253	0.00286146	2.54341	0.0317846	FALSE
YESphlox-Control	917	0.991153	-0.0128202	1.00183	0.00263316	0.992328	-0.0111107	0.999872	-0.000184134	110	0.000685057	0.00211474	2.67474	0.0240511	FALSE
YESphlox-Control	93	0.978538	-0.0313007	0.989076	-0.0158474	0.981543	-0.026877	0.989005	-0.0159505	110	1.37892e-11	2.17563e-10	9.66242	0.028507	FALSE
YESphlox-Control	934	0.997462	-0.00366579	1.0082	0.0117876	1.00537	0.00772459	1.01301	0.0186511	222	0.511051	0.599746	0.222032	0.0552726	FALSE
YESphlox-Control	942	0.998445	-0.00224471	1.0092	0.0132086	0.995896	-0.00593251	1.00347	0.00499401	110	0.664056	0.748381	0.125877	0.0357267	FALSE
YESphlox-Control	965	0.975774	-0.0353812	0.986282	-0.0199279	0.992455	-0.0109265	1	0	119	4.56433e-06	2.4005e-05	4.6197	0.0543117	FALSE
YESphlox-Control	972_control	1	0	1.01077	0.0154533	1	0	1.0076	0.0109265	904	1	1	0	0.0359674	FALSE
YESphlox-Control	974	1.00032	0.000456175	1.01109	0.0159095	1.00283	0.00407844	1.01045	0.015005	335	0.889819	0.912898	0.0395777	0.0360923	FALSE
YESphlox-Control	993	1.00344	0.0049517	1.01424	0.020405	0.992838	-0.0103693	1.00039	0.00055721	48	0.614211	0.704221	0.152291	0.0467363	FALSE
YESphlox-Control	996	0.992757	-0.0104869	1.00345	0.00496645	0.992741	-0.0105111	1.00029	0.000415416	55	0.0142886	0.0302833	1.5188	0.0197621	FALSE
EMM-Control	103	0.998285	-0.00247664	1.01342	0.0192372	1.00503	0.00723782	1.0142	0.0203443	36	0.822939	0.914428	0.0388507	0.0400433	FALSE
EMM-Control	1039	0.992387	-0.0110257	1.00744	0.0106881	0.991085	-0.0129187	1.00013	0.000187729	58	0.202807	0.366984	0.435353	0.0348972	FALSE
EMM-Control	1064	1.00772	0.0110975	1.023	0.0328113	1.01337	0.0191566	1.02261	0.0322631	70	0.62596	0.775646	0.110337	0.129912	FALSE
EMM-Control	1088	0.995338	-0.00674095	1.01043	0.0149729	1.00748	0.0107544	1.01668	0.0238608	46	0.433883	0.605889	0.217607	0.030949	FALSE
EMM-Control	1122	0.991203	-0.0127476	1.00623	0.0089662	0.994019	-0.00865467	1.00309	0.00445179	45	0.0634544	0.150704	0.821875	0.0182427	FALSE
EMM-Control	1125	1.00278	0.0040062	1.01799	0.02572	1.01249	0.0179109	1.02173	0.0310173	44	0.6709	0.813644	0.0895654	0.0353281	FALSE
EMM-Control	1130	0.991313	-0.012587	1.00635	0.00912686	1.00717	0.010302	1.01636	0.0234085	46	0.370235	0.555352	0.255432	0.0606585	FALSE
EMM-Control	115	0.992404	-0.0110001	1.00745	0.0107137	0.989783	-0.0148155	0.998816	-0.00170903	48	0.422944	0.602695	0.219903	0.0603876	FALSE
EMM-Control	1154	0.991587	-0.0121891	1.00662	0.00952476	0.992455	-0.010927	1.00151	0.00217949	46	0.1046	0.220823	0.655957	0.0233885	FALSE
EMM-Control	1164	0.99331	-0.00968353	1.00837	0.0120303	0.996257	-0.00541053	1.00535	0.00769593	34	0.358558	0.552373	0.257767	0.0361407	FALSE
EMM-Control	1165	0.984803	-0.022093	0.999737	-0.000379207	0.995245	-0.00687659	1.00433	0.00622987	55	0.00348118	0.0183951	1.7353	0.0253488	FALSE
EMM-Control	1166	0.998078	-0.0027751	1.01321	0.0189387	0.992697	-0.0105753	1.00176	0.00253114	45	0.925107	0.958748	0.0182957	0.135936	FALSE
EMM-Control	12	1.0195	0.0278633	1.03496	0.0495771	1.00631	0.00906912	1.01549	0.0221756	48	0.288515	0.450557	0.34625	0.124949	FALSE
EMM-Control	1249	1.00151	0.00217878	1.0167	0.0238926	1.00082	0.00118602	1.00996	0.0142925	45	0.825179	0.914428	0.0388507	0.0382241	FALSE
EMM-Control	1255	0.980349	-0.0286332	0.995215	-0.00691937	0.990295	-0.01407	0.999332	-0.000963531	48	0.00544036	0.0236208	1.62671	0.0401992	FALSE
EMM-Control	130	0.994652	-0.00773669	1.00974	0.0139771	0.994123	-0.00850404	1.0032	0.00460242	58	0.561646	0.711419	0.147875	0.0643111	FALSE
EMM-Control	1326	1.01013	0.0145363	1.02545	0.0362501	1.00747	0.0107405	1.01667	0.023847	34	0.152745	0.295135	0.529979	0.0345005	FALSE
EMM-Control	1343	1.00242	0.00348385	1.01762	0.0251977	0.991741	-0.0119651	1.00079	0.00114135	11	0.8883	0.93765	0.0279592	0.0551222	FALSE
EMM-Control	1348	1.0273	0.0388623	1.04288	0.0605761	1.01928	0.0275562	1.02859	0.0406627	22	0.0373031	0.101251	0.9946	0.0562463	FALSE
EMM-Control	1361	0.997841	-0.00311782	1.01297	0.018596	1.00771	0.0110755	1.0169	0.0241819	33	0.754244	0.877386	0.0568091	0.0330521	FALSE
EMM-Control	137	1.00649	0.00932966	1.02175	0.0310435	1.01188	0.0170427	1.02112	0.0301492	34	0.379547	0.561926	0.250321	0.0368207	FALSE
EMM-Control	1372	1.00454	0.00653225	1.01977	0.0282461	1.00776	0.0111586	1.01696	0.024265	24	0.436827	0.605889	0.217607	0.0214651	FALSE
EMM-Control	1415	0.98738	-0.0183225	1.00235	0.00339134	0.99274	-0.0105118	1.0018	0.00259464	34	0.0137457	0.0474851	1.32344	0.0192154	FALSE
EMM-Control	144	0.967305	-0.0479576	0.981974	-0.0262437	0.979425	-0.0299928	0.988364	-0.0168863	23	3.83413e-06	5.46364e-05	4.26252	0.0244771	FALSE
EMM-Control	1443	0.987464	-0.0182001	1.00244	0.00351371	0.990956	-0.0131065	1	0	33	0.0153281	0.0499258	1.30167	0.0193496	FALSE
EMM-Control	145	0.985536	-0.0210199	1.00048	0.000693961	0.992824	-0.0103896	1.00188	0.0027169	34	0.0859409	0.184854	0.733171	0.0432203	FALSE
EMM-Control	1460	0.978344	-0.0315864	0.99318	-0.0098726	0.990192	-0.0142197	0.999229	-0.00111319	44	0.000156686	0.0013524	2.86889	0.0268736	FALSE
EMM-Control	1519	0.976565	-0.0342124	0.991374	-0.0124985	0.978182	-0.0318258	0.987109	-0.0187193	47	0.0173885	0.0550636	1.25914	0.06113	FALSE
EMM-Control	1530	1.02916	0.0414722	1.04477	0.063186	1.01855	0.026519	1.02785	0.0396254	45	0.000443109	0.00315715	2.5007	0.0471046	FALSE
EMM-Control	1559	0.988199	-0.0171267	1.00318	0.00458714	0.993553	-0.00933169	1.00262	0.00377477	46	0.022512	0.0658042	1.18175	0.0230638	FALSE
EMM-Control	1562	1.0366	0.0518592	1.05232	0.073573	0.993996	-0.00868827	1.00307	0.00441819	47	0.255578	0.428469	0.368081	0.219687	FALSE
EMM-Control	1624	1.00239	0.00344822	1.01759	0.025162	1.00866	0.0124369	1.01786	0.0255433	46	0.654457	0.802238	0.0956967	0.0252351	FALSE
EMM-Control	1670	0.989101	-0.0158097	1.0041	0.00590413	0.994542	-0.00789616	1.00362	0.0052103	58	0.0615729	0.149347	0.825803	0.0332146	FALSE
EMM-Control	168	0.992988	-0.0101519	1.00805	0.0115619	0.990956	-0.0131065	1	0	36	0.272296	0.443454	0.353151	0.0305893	FALSE
EMM-Control	1696	1.02192	0.0312854	1.03742	0.0529992	1.00987	0.0141677	1.01908	0.0272742	45	0.0408438	0.108284	0.965437	0.0663225	FALSE
EMM-Control	177	0.994664	-0.00771876	1.00975	0.0139951	0.990956	-0.0131065	1	0	33	0.401174	0.586331	0.231857	0.0291074	FALSE
EMM-Control	187	1.01452	0.0207992	1.02991	0.042513	1.00384	0.00553609	1.01301	0.0186426	47	0.368716	0.555352	0.255432	0.108135	FALSE
EMM-Control	188	0.972311	-0.0405108	0.987055	-0.018797	0.980249	-0.0287795	0.989195	-0.015673	11	0.00779832	0.0296336	1.52822	0.0274302	FALSE
EMM-Control	189	0.974428	-0.0373721	0.989205	-0.0156582	0.990802	-0.0133307	0.999845	-0.000224282	36	0.0181615	0.055957	1.25215	0.0590754	FALSE
EMM-Control	190	0.987158	-0.0186465	1.00213	0.00306727	0.991112	-0.0128804	1.00016	0.000226045	46	0.0543053	0.137573	0.861466	0.0367111	FALSE
EMM-Control	194	0.992652	-0.0106402	1.00771	0.0110736	1.0086	0.0123531	1.0178	0.0254595	36	0.410101	0.591791	0.227832	0.0484548	FALSE
EMM-Control	239	0.976274	-0.0346418	0.991079	-0.012928	0.993027	-0.010095	1.00209	0.00301141	35	0.0839758	0.184101	0.734944	0.07698	FALSE
EMM-Control	242	0.97952	-0.0298537	0.994374	-0.00813986	0.991147	-0.012829	1.00019	0.000277441	22	0.00508727	0.0236208	1.62671	0.0273981	FALSE
EMM-Control	248	0.97875	-0.0309874	0.993593	-0.00927354	0.98372	-0.0236797	0.992698	-0.0105732	33	0.00101799	0.00610794	2.21411	0.0284234	FALSE
EMM-Control	254	0.984819	-0.0220696	0.999753	-0.000355797	0.990956	-0.0131065	1	0	35	0.00621875	0.024915	1.60354	0.0229724	FALSE
EMM-Control	256	0.989339	-0.0154631	1.00434	0.00625076	0.992494	-0.0108697	1.00155	0.00223674	45	0.0457527	0.118541	0.926131	0.0245325	FALSE
EMM-Control	26	1.00479	0.00689536	1.02003	0.0286092	1.00095	0.00136836	1.01008	0.0144748	23	0.610092	0.764292	0.116741	0.0411688	FALSE
EMM-Control	282	1.01747	0.0249828	1.0329	0.0466966	1.01689	0.0241665	1.02617	0.0372729	47	0.08147	0.182109	0.739668	0.0631475	FALSE
EMM-Control	284	0.974877	-0.0367083	0.98966	-0.0149945	0.982399	-0.0256191	0.991364	-0.0125126	24	7.57645e-05	0.000785195	3.10502	0.0224065	FALSE
EMM-Control	289	0.981049	-0.0276024	0.995927	-0.0058886	0.99266	-0.0106286	1.00172	0.00247782	43	0.0055944	0.0236208	1.62671	0.0361682	FALSE
EMM-Control	30	1.0017	0.00245287	1.01689	0.0241667	1.0034	0.00489313	1.01255	0.0179996	46	0.851549	0.922927	0.0348326	0.0563573	FALSE
EMM-Control	31	1.03477	0.0493055	1.05046	0.0710193	1.03591	0.0508927	1.04536	0.0639992	23	0.000166084	0.0013524	2.86889	0.0355448	FALSE
EMM-Control	323	0.998229	-0.00255705	1.01337	0.0191568	0.999955	-6.54056e-05	1.00908	0.0130411	11	0.804493	0.914428	0.0388507	0.0198666	FALSE
EMM-Control	335	1.01419	0.0203249	1.02957	0.0420387	1.00981	0.0140853	1.01903	0.0271917	48	0.162512	0.308773	0.510361	0.0651481	FALSE
EMM-Control	37	0.999898	-0.000146679	1.01506	0.0215671	1.01277	0.0183048	1.02201	0.0314112	23	0.990767	0.999534	0.000202243	0.0380266	FALSE
EMM-Control	377	1.10063	0.138327	1.11732	0.160041	1.02408	0.0343316	1.03343	0.0474381	12	0.246917	0.420127	0.37662	0.289119	FALSE
EMM-Control	382	0.991211	-0.0127356	1.00624	0.00897817	0.995323	-0.00676293	1.00441	0.00634354	33	0.137096	0.269464	0.5695	0.0256162	FALSE
EMM-Control	383	0.990792	-0.0133452	1.00582	0.0083686	0.995892	-0.00593864	1.00498	0.00716782	46	0.179697	0.330411	0.480945	0.0385507	FALSE
EMM-Control	388	1.01294	0.0185481	1.0283	0.0402619	1.01135	0.0162811	1.02058	0.0293875	68	0.0686532	0.156529	0.805404	0.0492585	FALSE
EMM-Control	389	0.985704	-0.0207735	1.00065	0.000940303	0.979594	-0.0297446	0.988534	-0.0166382	24	0.126558	0.253115	0.596681	0.0410944	FALSE
EMM-Control	394	0.995712	-0.00619887	1.01081	0.0155149	0.995583	-0.00638691	1.00467	0.00671955	46	0.473807	0.635002	0.197225	0.0312195	FALSE
EMM-Control	399	0.954764	-0.066784	0.969243	-0.0450702	0.953007	-0.0694415	0.961704	-0.0563351	35	1.43521e-06	3.27807e-05	4.48438	0.044461	FALSE
EMM-Control	400	0.9724	-0.0403781	0.987146	-0.0186643	0.976195	-0.0347585	0.985104	-0.021652	34	1.67936e-06	3.27807e-05	4.48438	0.0227405	FALSE
EMM-Control	401	1.01651	0.0236219	1.03192	0.0453357	1.01583	0.0226609	1.0251	0.0357673	44	0.0203501	0.0610503	1.21431	0.0391099	FALSE
EMM-Control	402	1.01178	0.0168915	1.02712	0.0386053	1.011	0.015785	1.02023	0.0288915	34	0.0591867	0.14668	0.833629	0.0283067	FALSE
EMM-Control	410	0.988669	-0.0164407	1.00366	0.00527314	0.996388	-0.00521989	1.00548	0.00788658	45	0.0661676	0.153941	0.812646	0.0321212	FALSE
EMM-Control	412	1.00326	0.00470063	1.01848	0.0264144	1.0117	0.0167774	1.02093	0.0298838	22	0.738069	0.867421	0.0617699	0.0421688	FALSE
EMM-Control	414	0.985273	-0.0214053	1.00021	0.000308553	0.993467	-0.00945578	1.00253	0.00365068	48	0.00633802	0.024915	1.60354	0.0256471	FALSE
EMM-Control	421	1.00234	0.00336903	1.01754	0.0250829	1.00175	0.00251913	1.01089	0.0156256	11	0.826193	0.914428	0.0388507	0.0326405	FALSE
EMM-Control	426	1.0016	0.00230528	1.01679	0.0240191	1.01504	0.0215309	1.0243	0.0346374	35	0.922078	0.958748	0.0182957	0.0947191	FALSE
EMM-Control	452	1.00489	0.00704252	1.02013	0.0287563	1.00731	0.0105046	1.0165	0.023611	47	0.543737	0.704387	0.152189	0.0488833	FALSE
EMM-Control	46	1.01336	0.0191464	1.02873	0.0408602	1.00377	0.0054238	1.01293	0.0185303	43	0.228167	0.394107	0.404386	0.0682503	FALSE
EMM-Control	463	0.961056	-0.057307	0.975631	-0.0355932	0.982256	-0.0258288	0.99122	-0.0127223	55	0.000860215	0.00544803	2.26376	0.0789282	FALSE
EMM-Control	475	0.984841	-0.0220377	0.999775	-0.000323933	0.997237	-0.00399135	1.00634	0.00911511	35	0.00518267	0.0236208	1.62671	0.0219244	FALSE
EMM-Control	507	1.00016	0.000237577	1.01533	0.0219514	0.998929	-0.00154562	1.00805	0.0115608	45	0.98036	0.997866	0.000927722	0.0369726	FALSE
EMM-Control	51	0.984565	-0.0224413	0.999496	-0.000727447	0.982588	-0.0253414	0.991555	-0.0122349	23	0.44113	0.605889	0.217607	0.0940477	FALSE
EMM-Control	515	0.982942	-0.0248212	0.997848	-0.00310735	0.990648	-0.0135551	0.999689	-0.000448599	35	0.0104317	0.0371629	1.42989	0.0313106	FALSE
EMM-Control	524	0.969211	-0.0451176	0.983909	-0.0234038	0.984568	-0.0224375	0.993553	-0.00933108	24	0.000105334	0.00100067	2.99971	0.0303477	FALSE
EMM-Control	534	0.998414	-0.00228935	1.01356	0.0194245	0.996584	-0.00493601	1.00568	0.00817045	47	0.819267	0.914428	0.0388507	0.0398857	FALSE
EMM-Control	538	0.985147	-0.0215896	1.00009	0.000124238	0.990432	-0.0138708	0.99947	-0.000764287	44	0.0282869	0.0786513	1.10429	0.0365065	FALSE
EMM-Control	539	0.980715	-0.0280948	0.995587	-0.00638094	0.989133	-0.0157642	0.998159	-0.00265774	47	0.00156914	0.00894408	2.04846	0.0315115	FALSE
EMM-Control	59	0.995668	-0.00626326	1.01077	0.0154506	0.990956	-0.0131065	1	0	46	0.560221	0.711419	0.147875	0.0434453	FALSE
EMM-Control	601	1.01254	0.0179837	1.0279	0.0396975	1.00862	0.0123855	1.01783	0.025492	24	0.277146	0.444995	0.351644	0.0529346	FALSE
EMM-Control	628	0.999002	-0.00144119	1.01415	0.0202726	0.986442	-0.0196941	0.995444	-0.00658767	35	0.960672	0.986637	0.00584281	0.118514	FALSE
EMM-Control	650	1.00244	0.00351245	1.01764	0.0252263	0.990956	-0.0131065	1	0	23	0.840849	0.921699	0.0354107	0.0554116	FALSE
EMM-Control	720	0.995687	-0.00623534	1.01079	0.0154785	0.980513	-0.0283908	0.989462	-0.0152844	23	0.725548	0.861589	0.0647	0.0561036	FALSE
EMM-Control	737	0.976861	-0.0337754	0.991674	-0.0120616	0.983734	-0.0236596	0.992712	-0.0105531	45	1.56107e-05	0.000177961	3.74967	0.0235163	FALSE
EMM-Control	738	0.986151	-0.0201188	1.00111	0.00159501	0.991418	-0.0124342	1.00047	0.000672224	47	0.0278296	0.0786513	1.10429	0.0337844	FALSE
EMM-Control	745	0.975127	-0.0363377	0.989915	-0.0146239	0.983447	-0.0240815	0.992422	-0.010975	46	0.0037113	0.0183951	1.7353	0.0504716	FALSE
EMM-Control	767	0.986338	-0.0198463	1.0013	0.00186749	0.990956	-0.0131065	1	0	46	0.00858194	0.0315594	1.50087	0.023192	FALSE
EMM-Control	778	0.995134	-0.0070369	1.01023	0.0146769	1.00122	0.00175653	1.01036	0.014863	46	0.473058	0.635002	0.197225	0.0380738	FALSE
EMM-Control	780	0.985629	-0.0208839	1.00058	0.000829961	0.995103	-0.00708291	1.00418	0.00602356	68	0.107958	0.222977	0.651741	0.066693	FALSE
EMM-Control	781	0.992277	-0.0111847	1.00732	0.0105291	0.990956	-0.0131065	1	0	66	0.206357	0.367573	0.434657	0.038684	FALSE
EMM-Control	784	0.983732	-0.0236632	0.99865	-0.00194943	1.00383	0.00551234	1.01299	0.0186188	12	0.259815	0.429259	0.367281	0.046593	FALSE
EMM-Control	79	0.99547	-0.00655029	1.01057	0.0151635	0.998543	-0.00210387	1.00766	0.0110026	48	0.5242	0.686883	0.163117	0.0417064	FALSE
EMM-Control	808	0.992381	-0.0110338	1.00743	0.01068	0.995032	-0.00718584	1.00411	0.00592063	36	0.218571	0.38334	0.416416	0.0290624	FALSE
EMM-Control	819	0.99487	-0.00742012	1.00996	0.0142937	0.99501	-0.00721691	1.00409	0.00588956	35	0.479037	0.635002	0.197225	0.0364734	FALSE
EMM-Control	86	1.01502	0.021506	1.03041	0.0432198	1.00799	0.011477	1.01719	0.0245835	45	0.109532	0.222977	0.651741	0.0572203	FALSE
EMM-Control	87	0.977371	-0.0330223	0.992192	-0.0113085	0.989253	-0.0155883	0.998281	-0.00248186	33	0.000815763	0.00544803	2.26376	0.0302789	FALSE
EMM-Control	90	1.00888	0.0127609	1.02418	0.0344747	1.00983	0.0141085	1.01904	0.027215	46	0.173066	0.323434	0.490214	0.0357011	FALSE
EMM-Control	900	1.00107	0.00154177	1.01625	0.0232556	1.0059	0.00848083	1.01508	0.0215873	44	0.866256	0.922927	0.0348326	0.0337118	FALSE
EMM-Control	917	0.998551	-0.00209183	1.01369	0.019622	1.005	0.00719985	1.01417	0.0203063	23	0.864214	0.922927	0.0348326	0.036335	FALSE
EMM-Control	93	0.973581	-0.0386265	0.988345	-0.0169127	0.983182	-0.0244703	0.992154	-0.0113638	22	0.000337022	0.00256137	2.59153	0.0266236	FALSE
EMM-Control	934	1.03428	0.0486253	1.04996	0.0703391	1.01041	0.014938	1.01963	0.0280444	23	0.282334	0.447028	0.349665	0.150366	FALSE
EMM-Control	942	1.00239	0.00344888	1.01759	0.0251627	1.01088	0.0156052	1.0201	0.0287117	22	0.68133	0.817596	0.0874611	0.0205465	FALSE
EMM-Control	965	1.03469	0.049196	1.05038	0.0709098	1.03889	0.0550404	1.04837	0.0681468	11	1.7253e-06	3.27807e-05	4.48438	0.0148495	FALSE
EMM-Control	972_control	1	0	1.01516	0.0217138	1	0	1.00913	0.0131065	174	1	1	0	0.0519314	FALSE
EMM-Control	974	1.02227	0.0317747	1.03777	0.0534885	1.02253	0.0321368	1.03186	0.0452432	58	0.00369808	0.0183951	1.7353	0.049579	FALSE
EMM-Control	996	0.967541	-0.0476051	0.982214	-0.0258913	0.976073	-0.0349397	0.98498	-0.0218332	12	6.90025e-06	8.74032e-05	4.05847	0.0161948	FALSE
EMMphlox-Control	1	0.885427	-0.175555	0.88916	-0.169485	0.979102	-0.0304692	0.981868	-0.0263992	40	0.000389375	0.00416279	2.38062	0.186918	FALSE
EMMphlox-Control	103	1.00158	0.00228166	1.00581	0.00835191	0.998235	-0.00254791	1.00106	0.00152208	60	0.75082	0.846163	0.0725461	0.0317837	FALSE
EMMphlox-Control	1039	1.0063	0.00906638	1.01055	0.0151366	1.00269	0.00388235	1.00553	0.00795235	74	0.358133	0.546826	0.262151	0.0536823	FALSE
EMMphlox-Control	1064	1.02439	0.0347668	1.02871	0.0408371	1.02485	0.0354066	1.02774	0.0394766	60	7.90864e-07	2.80757e-05	4.55167	0.0291905	FALSE
EMMphlox-Control	1088	0.992481	-0.0108886	0.996666	-0.00481832	0.996743	-0.00470721	0.999558	-0.000637217	37	0.211685	0.385203	0.41431	0.031992	FALSE
EMMphlox-Control	1097	0.965071	-0.0512923	0.969141	-0.0452221	0.986951	-0.0189499	0.989739	-0.0148799	24	0.00468658	0.0266198	1.5748	0.0538079	FALSE
EMMphlox-Control	1122	0.986025	-0.0203041	0.990182	-0.0142338	0.992394	-0.0110149	0.995198	-0.00694492	52	0.0290385	0.0981779	1.00799	0.0406224	FALSE
EMMphlox-Control	1125	1.01748	0.0249938	1.02177	0.0310641	1.01973	0.0281813	1.02261	0.0322513	38	0.00457461	0.0266198	1.5748	0.0322812	FALSE
EMMphlox-Control	1130	1.0213	0.0304057	1.02561	0.0364759	1.01365	0.019553	1.01651	0.023623	40	0.00252961	0.0163275	1.78708	0.0388475	FALSE
EMMphlox-Control	115	0.990619	-0.0135984	0.994795	-0.00752815	0.997213	-0.00402691	1.00003	4.30793e-05	40	0.0709204	0.190013	0.721216	0.0271069	FALSE
EMMphlox-Control	1154	1.0065	0.00935301	1.01075	0.0154233	1.00585	0.00841877	1.00869	0.0124888	40	0.393387	0.582157	0.23496	0.0444984	FALSE
EMMphlox-Control	1164	1.02936	0.0417449	1.0337	0.0478151	1.01755	0.0250951	1.02042	0.0291651	30	0.00154821	0.0112595	1.94848	0.0445366	FALSE
EMMphlox-Control	1165	0.987821	-0.0176787	0.991986	-0.0116084	0.997183	-0.00406999	1	0	49	0.0606267	0.175694	0.755244	0.0402675	FALSE
EMMphlox-Control	1166	1.00616	0.00886547	1.01041	0.0149357	1.01118	0.0160409	1.01404	0.0201109	40	0.223926	0.39407	0.404426	0.0263856	FALSE
EMMphlox-Control	12	1.00478	0.00687419	1.00901	0.0129444	1.00166	0.0023946	1.00449	0.00646459	40	0.239139	0.409129	0.388139	0.0182686	FALSE
EMMphlox-Control	1249	0.994011	-0.00866654	0.998202	-0.00259629	0.99669	-0.00478315	0.999506	-0.000713156	40	0.181624	0.363248	0.439797	0.0218093	FALSE
EMMphlox-Control	1255	0.987871	-0.0176049	0.992037	-0.0115347	0.991995	-0.0115955	0.994797	-0.00752548	58	0.0655282	0.1861	0.730254	0.044746	FALSE
EMMphlox-Control	130	0.97406	-0.0379181	0.978167	-0.0318478	1.00556	0.00799349	1.0084	0.0120635	70	0.205544	0.379856	0.420382	0.168935	FALSE
EMMphlox-Control	1326	1.01363	0.0195355	1.01791	0.0256058	1.00465	0.00669173	1.00749	0.0107617	42	0.148503	0.305615	0.514825	0.0575721	FALSE
EMMphlox-Control	1343	0.965325	-0.0509137	0.969395	-0.0448434	0.95889	-0.0605626	0.961599	-0.0564926	10	0.00184556	0.0124795	1.9038	0.0257438	FALSE
EMMphlox-Control	1348	1.00349	0.00502763	1.00772	0.0110979	1.00079	0.00113814	1.00362	0.00520813	44	0.742475	0.843451	0.07394	0.0678	FALSE
EMMphlox-Control	1361	1.01636	0.0234115	1.02065	0.0294818	1.01011	0.0145069	1.01296	0.0185769	54	0.02604	0.0924421	1.03413	0.0488582	FALSE
EMMphlox-Control	137	0.997792	-0.00318898	1.002	0.00288128	0.999912	-0.000126886	1.00274	0.00394311	30	0.684017	0.82314	0.0845265	0.0252558	FALSE
EMMphlox-Control	1372	0.996886	-0.00449982	1.00109	0.00157043	1.0014	0.00201286	1.00423	0.00608285	20	0.558163	0.727148	0.138377	0.0199529	FALSE
EMMphlox-Control	1415	0.996338	-0.00529343	1.00054	0.000776822	0.994597	-0.00781616	0.997407	-0.00374616	54	0.530497	0.700415	0.154644	0.0374769	FALSE
EMMphlox-Control	144	1.00023	0.000336179	1.00445	0.00640643	0.999912	-0.000127277	1.00274	0.00394272	20	0.970088	0.976968	0.0101198	0.0245817	FALSE
EMMphlox-Control	1443	1.01501	0.0214936	1.01929	0.0275639	1.00782	0.0112331	1.01066	0.0153031	64	0.0882032	0.212286	0.673079	0.0660301	FALSE
EMMphlox-Control	145	1.01005	0.0144272	1.01431	0.0204974	1.00405	0.00582842	1.00688	0.00989841	30	0.0801573	0.19969	0.699643	0.026754	FALSE
EMMphlox-Control	1460	1.01152	0.0165299	1.01579	0.0226001	1.00961	0.0137924	1.01246	0.0178624	64	0.0798069	0.19969	0.699643	0.0470558	FALSE
EMMphlox-Control	1519	0.987156	-0.0186497	0.991319	-0.0125794	0.988032	-0.01737	0.990824	-0.0133	40	0.0214909	0.0803082	1.09524	0.0296573	FALSE
EMMphlox-Control	1530	1.01258	0.0180308	1.01685	0.0241011	1.00137	0.00197505	1.0042	0.00604504	64	0.352605	0.544238	0.264211	0.10553	FALSE
EMMphlox-Control	1559	0.996814	-0.00460437	1.00102	0.00146589	1.00115	0.00165278	1.00397	0.00572277	40	0.613151	0.767011	0.115198	0.035521	FALSE
EMMphlox-Control	1562	0.996344	-0.00528398	1.00055	0.000786272	0.994646	-0.00774504	0.997456	-0.00367505	40	0.436003	0.61859	0.208597	0.0235932	FALSE
EMMphlox-Control	1624	1.01229	0.0176277	1.01656	0.0236979	1.00393	0.00566522	1.00677	0.00973522	40	0.214303	0.385203	0.41431	0.0593434	FALSE
EMMphlox-Control	1670	0.993204	-0.00983821	0.997392	-0.00376796	0.995886	-0.0059473	0.9987	-0.00187731	74	0.284466	0.459025	0.338164	0.0487879	FALSE
EMMphlox-Control	168	1.00615	0.00884019	1.01039	0.0149104	1.00588	0.00845268	1.00872	0.0125227	30	0.273829	0.452136	0.344731	0.026293	FALSE
EMMphlox-Control	1696	1.00445	0.00641117	1.00869	0.0124814	1.01397	0.0200087	1.01683	0.0240787	64	0.568852	0.734336	0.134105	0.0582592	FALSE
EMMphlox-Control	175	1.00484	0.00697107	1.00908	0.0130413	1.00843	0.0121169	1.01128	0.0161869	20	0.393571	0.582157	0.23496	0.0217164	FALSE
EMMphlox-Control	177	1.00553	0.00796197	1.00977	0.0140322	1.00161	0.00232549	1.00444	0.00639548	48	0.407502	0.59205	0.227641	0.0417824	FALSE
EMMphlox-Control	187	1.01005	0.014424	1.01431	0.0204943	1.01134	0.0162658	1.0142	0.0203358	40	0.05871	0.173684	0.760241	0.0279516	FALSE
EMMphlox-Control	188	1.02876	0.0409124	1.0331	0.0469827	1.02621	0.0373264	1.02911	0.0413964	9	0.0546133	0.165002	0.782511	0.0381831	FALSE
EMMphlox-Control	189	0.984375	-0.0227196	0.988526	-0.0166493	0.985283	-0.0213899	0.988067	-0.0173199	30	0.0374666	0.120915	0.91752	0.0367674	FALSE
EMMphlox-Control	190	1.00263	0.00379582	1.00686	0.00986608	1.00314	0.00451644	1.00597	0.00858644	40	0.614752	0.767011	0.115198	0.0277865	FALSE
EMMphlox-Control	194	1.01043	0.0149754	1.01469	0.0210457	1.00704	0.0101265	1.00989	0.0141965	30	0.0168593	0.0665004	1.17718	0.017631	FALSE
EMMphlox-Control	230	1.01194	0.0171295	1.01621	0.0231997	1.00871	0.0125045	1.01155	0.0165745	12	0.472833	0.641336	0.192914	0.0551392	FALSE
EMMphlox-Control	239	1.02016	0.0287969	1.02446	0.0348671	1.02042	0.0291594	1.0233	0.0332294	30	0.000430446	0.00416279	2.38062	0.025125	FALSE
EMMphlox-Control	242	0.996842	-0.00456308	1.00105	0.00150718	0.997213	-0.00402637	1.00003	4.36201e-05	20	0.474228	0.641336	0.192914	0.0150058	FALSE
EMMphlox-Control	248	0.99721	-0.00403123	1.00141	0.00203902	1.00654	0.00941038	1.00939	0.0134804	30	0.704385	0.826633	0.0826874	0.0370142	FALSE
EMMphlox-Control	253	0.967682	-0.0473946	0.971762	-0.0413244	0.969208	-0.0451217	0.971946	-0.0410517	12	0.106779	0.244559	0.611616	0.0635104	FALSE
EMMphlox-Control	254	0.997592	-0.00347878	1.0018	0.00259147	1.00182	0.00262942	1.00465	0.00669942	30	0.674827	0.819021	0.0867052	0.0272464	FALSE
EMMphlox-Control	256	1.00633	0.00910634	1.01058	0.0151766	1.00916	0.0131574	1.01201	0.0172274	40	0.242098	0.409261	0.388	0.0289605	FALSE
EMMphlox-Control	26	1.00776	0.0111533	1.01201	0.0172236	1.007	0.0100613	1.00984	0.0141313	20	0.135495	0.291519	0.535333	0.0189953	FALSE
EMMphlox-Control	264	1.00365	0.0052568	1.00788	0.0113271	1.00159	0.00228674	1.00442	0.00635673	24	0.579073	0.740796	0.130302	0.0288787	FALSE
EMMphlox-Control	282	1.00571	0.00822106	1.00996	0.0142913	1.0105	0.0150671	1.01335	0.0191371	52	0.499205	0.668747	0.174738	0.0573327	FALSE
EMMphlox-Control	284	0.969947	-0.0440219	0.974037	-0.0379517	0.967039	-0.0483541	0.969771	-0.0442841	32	0.00034093	0.00403434	2.39423	0.0406377	FALSE
EMMphlox-Control	289	0.994091	-0.00855042	0.998282	-0.00248017	0.99674	-0.00471143	0.999555	-0.000641439	40	0.201999	0.379856	0.420382	0.0230028	FALSE
EMMphlox-Control	30	1.00514	0.0074022	1.00938	0.0134725	1.00432	0.00621657	1.00716	0.0102866	64	0.28119	0.458954	0.33823	0.0306676	FALSE
EMMphlox-Control	31	1.01605	0.0229683	1.02033	0.0290385	1.01917	0.0273941	1.02205	0.0314641	44	0.0942125	0.222969	0.651755	0.0597939	FALSE
EMMphlox-Control	318	0.957941	-0.0619915	0.96198	-0.0559213	0.933141	-0.0998334	0.935777	-0.0957634	6	0.147548	0.305615	0.514825	0.0603092	FALSE
EMMphlox-Control	3205	0.977451	-0.0329044	0.981572	-0.0268341	0.956065	-0.0648191	0.958766	-0.0607491	11	0.408598	0.59205	0.227641	0.086648	FALSE
EMMphlox-Control	323	0.99656	-0.00497204	1.00076	0.00109822	0.993274	-0.00973651	0.99608	-0.00566652	10	0.705202	0.826633	0.0826874	0.026669	FALSE
EMMphlox-Control	335	0.996212	-0.00547545	1.00041	0.000594802	0.99714	-0.0041314	0.999957	-6.14078e-05	38	0.53271	0.700415	0.154644	0.0329948	FALSE
EMMphlox-Control	37	0.982841	-0.0249707	0.986985	-0.0189004	0.985248	-0.0214406	0.988032	-0.0173707	20	0.0695752	0.189994	0.721261	0.0384657	FALSE
EMMphlox-Control	377	0.998458	-0.00222682	1.00267	0.00384344	0.997183	-0.00406999	1	0	10	0.83447	0.890938	0.0501527	0.0211169	FALSE
EMMphlox-Control	382	1.01265	0.0181373	1.01692	0.0242075	1.00983	0.014107	1.01268	0.0181769	30	0.0257647	0.0924421	1.03413	0.0260065	FALSE
EMMphlox-Control	383	0.999598	-0.000580711	1.00381	0.00548954	1.00486	0.0069906	1.0077	0.0110606	40	0.953197	0.966814	0.0146569	0.0394417	FALSE
EMMphlox-Control	388	1.01291	0.0185069	1.01718	0.0245771	1.01456	0.0208504	1.01742	0.0249204	84	0.0825031	0.20199	0.69467	0.0626086	FALSE
EMMphlox-Control	389	1.00257	0.00370935	1.0068	0.00977961	1.00074	0.00106575	1.00357	0.00513574	38	0.710206	0.826633	0.0826874	0.038885	FALSE
EMMphlox-Control	394	1.0035	0.00503547	1.00773	0.0111057	1.00117	0.00168608	1.004	0.00575607	51	0.61577	0.767011	0.115198	0.0454026	FALSE
EMMphlox-Control	399	0.995574	-0.00639932	0.999772	-0.000329064	0.989115	-0.0157904	0.991909	-0.0117204	30	0.439983	0.61859	0.208597	0.0271124	FALSE
EMMphlox-Control	400	0.995748	-0.00614773	0.999946	-7.74728e-05	0.997183	-0.00406999	1	0	30	0.386632	0.582157	0.23496	0.0218353	FALSE
EMMphlox-Control	401	1.01501	0.0214913	1.01929	0.0275615	1.02501	0.035644	1.02791	0.039714	64	0.0960304	0.223546	0.650633	0.0678423	FALSE
EMMphlox-Control	402	1.01549	0.0221699	1.01977	0.0282402	1.025	0.0356286	1.0279	0.0396986	30	0.014557	0.0607967	1.21612	0.0297206	FALSE
EMMphlox-Control	405	1.0072	0.0103431	1.01144	0.0164134	0.997159	-0.00410489	0.999976	-3.48951e-05	12	0.73784	0.843451	0.07394	0.072305	FALSE
EMMphlox-Control	410	0.994888	-0.0073933	0.999083	-0.00132304	0.994456	-0.00801987	0.997266	-0.00394987	40	0.321349	0.507018	0.294977	0.0270926	FALSE
EMMphlox-Control	412	1.02346	0.0334573	1.02778	0.0395276	1.02513	0.0358002	1.02802	0.0398702	20	0.0102127	0.0467808	1.32993	0.0356045	FALSE
EMMphlox-Control	414	1.00413	0.00593959	1.00836	0.0120098	1.00317	0.00456983	1.00601	0.00863983	40	0.300401	0.479291	0.319401	0.017638	FALSE
EMMphlox-Control	421	1.02121	0.0302798	1.02552	0.0363501	1.02033	0.0290412	1.02322	0.0331112	10	0.0209497	0.0803082	1.09524	0.023637	FALSE
EMMphlox-Control	426	1.01478	0.0211735	1.01906	0.0272437	1.0098	0.0140763	1.01266	0.0181463	30	0.00746142	0.03784	1.42205	0.0247753	FALSE
EMMphlox-Control	4302	0.959659	-0.0594059	0.963706	-0.0533356	0.945303	-0.0811519	0.947973	-0.0770819	18	0.0116079	0.0510699	1.29183	0.0601311	FALSE
EMMphlox-Control	4320	0.978091	-0.03196	0.982215	-0.0258897	0.972952	-0.0395596	0.975701	-0.0354896	24	0.115031	0.255226	0.593076	0.0645395	FALSE
EMMphlox-Control	452	1.00679	0.00976372	1.01104	0.015834	1.00253	0.00364156	1.00536	0.00771155	40	0.205978	0.379856	0.420382	0.028608	FALSE
EMMphlox-Control	46	1.00876	0.0125861	1.01302	0.0186564	1.00391	0.00563237	1.00675	0.00970236	58	0.174701	0.354393	0.450515	0.0439089	FALSE
EMMphlox-Control	463	0.982338	-0.0257082	0.98648	-0.0196379	1.00147	0.00211975	1.0043	0.00618974	50	0.0539086	0.165002	0.782511	0.060532	FALSE
EMMphlox-Control	475	1.00194	0.00279839	1.00617	0.00886864	1.00696	0.0100111	1.00981	0.0140811	30	0.789126	0.86865	0.0611551	0.0364744	FALSE
EMMphlox-Control	5036	0.961131	-0.0571946	0.965184	-0.0511244	0.96682	-0.0486812	0.969551	-0.0446112	18	0.000614029	0.00544951	2.26364	0.0391211	FALSE
EMMphlox-Control	5040	0.978863	-0.0308219	0.98299	-0.0247516	0.977676	-0.0325712	0.980438	-0.0285012	18	0.190726	0.371002	0.430624	0.0651516	FALSE
EMMphlox-Control	5041	1.00311	0.00448331	1.00734	0.0105536	0.990645	-0.0135599	0.993444	-0.00948991	24	0.814711	0.883121	0.0539796	0.0631376	FALSE
EMMphlox-Control	507	1.01179	0.0169121	1.01606	0.0229823	1.00965	0.0138601	1.01251	0.0179301	40	0.00930012	0.0440206	1.35634	0.0217572	FALSE
EMMphlox-Control	51	0.988653	-0.0164644	0.992821	-0.0103941	0.997866	-0.00308165	1.00069	0.00098834	20	0.077959	0.19969	0.699643	0.0248542	FALSE
EMMphlox-Control	515	0.987619	-0.017974	0.991783	-0.0119037	1.0006	0.000862452	1.00342	0.00493244	54	0.0786953	0.19969	0.699643	0.046797	FALSE
EMMphlox-Control	524	0.998226	-0.00256173	1.00243	0.00350852	0.998992	-0.00145494	1.00181	0.00261505	20	0.763048	0.846506	0.0723698	0.0229054	FALSE
EMMphlox-Control	534	1.01343	0.0192505	1.01771	0.0253208	1.01511	0.021639	1.01798	0.025709	58	0.00389311	0.0240357	1.61914	0.0274387	FALSE
EMMphlox-Control	538	0.991166	-0.0128018	0.995345	-0.00673153	0.986536	-0.0195561	0.989323	-0.0154861	64	0.245302	0.409799	0.387429	0.0562262	FALSE
EMMphlox-Control	539	0.991548	-0.0122453	0.995729	-0.00617505	0.997183	-0.00406999	1	0	64	0.199017	0.379856	0.420382	0.0472982	FALSE
EMMphlox-Control	549	1.01834	0.0262183	1.02263	0.0322885	1.02358	0.0336296	1.02648	0.0376996	18	0.190625	0.371002	0.430624	0.0562434	FALSE
EMMphlox-Control	59	0.996062	-0.0056922	1.00026	0.000378056	0.997183	-0.00406999	1	0	38	0.63661	0.779298	0.108296	0.0481671	FALSE
EMMphlox-Control	5916	0.982242	-0.0258499	0.986383	-0.0197796	0.984605	-0.0223824	0.987387	-0.0183124	12	0.227712	0.394331	0.404139	0.0475737	FALSE
EMMphlox-Control	601	0.999425	-0.000829308	1.00364	0.00524095	1.00263	0.0037831	1.00546	0.00785309	44	0.943928	0.9643	0.0157877	0.0507838	FALSE
EMMphlox-Control	628	0.9755	-0.0357868	0.979613	-0.0297166	0.972641	-0.040021	0.975389	-0.035951	30	0.000120707	0.00190449	2.72022	0.0282177	FALSE
EMMphlox-Control	6379	0.968942	-0.0455184	0.973027	-0.0394482	0.962674	-0.0548801	0.965394	-0.0508102	18	0.0118684	0.0510699	1.29183	0.0461057	FALSE
EMMphlox-Control	650	0.984788	-0.0221152	0.98894	-0.0160449	0.99683	-0.00457989	0.999647	-0.000509896	32	0.0520031	0.164099	0.784895	0.0400855	FALSE
EMMphlox-Control	6596	0.997	-0.00433431	1.0012	0.00173594	0.988296	-0.016985	0.991088	-0.012915	12	0.895227	0.931198	0.030958	0.0768586	FALSE
EMMphlox-Control	7	0.979164	-0.0303776	0.983293	-0.0243073	0.953253	-0.0690692	0.955946	-0.0649992	12	0.436427	0.61859	0.208597	0.0892865	FALSE
EMMphlox-Control	720	1.00309	0.00444616	1.00732	0.0105164	0.998738	-0.00182175	1.00156	0.00224824	18	0.761592	0.846506	0.0723698	0.041018	FALSE
EMMphlox-Control	737	0.98693	-0.0189809	0.991091	-0.0129106	0.992681	-0.0105979	0.995485	-0.00652786	51	0.068026	0.189406	0.722607	0.046312	FALSE
EMMphlox-Control	738	0.979998	-0.0291498	0.98413	-0.0230796	0.974896	-0.0366803	0.97765	-0.0326104	40	0.000439731	0.00416279	2.38062	0.0293887	FALSE
EMMphlox-Control	745	0.996362	-0.00525833	1.00056	0.000811919	1.00118	0.00169969	1.00401	0.00576968	40	0.628484	0.776041	0.110115	0.0439317	FALSE
EMMphlox-Control	7506	0.982428	-0.0255768	0.98657	-0.0195066	0.96753	-0.0476221	0.970263	-0.0435522	12	0.146604	0.305615	0.514825	0.0382448	FALSE
EMMphlox-Control	7507	0.959894	-0.0590524	0.963942	-0.0529822	0.964899	-0.0515506	0.967625	-0.0474806	24	0.0081553	0.0399328	1.39867	0.0672243	FALSE
EMMphlox-Control	767	1.00365	0.00525695	1.00788	0.0113272	1.01044	0.0149821	1.01329	0.0190521	40	0.470536	0.641336	0.192914	0.0264286	FALSE
EMMphlox-Control	7767	0.882497	-0.180336	0.886218	-0.174266	0.962996	-0.0543979	0.965717	-0.0503279	27	0.0272598	0.0944122	1.02497	0.261754	FALSE
EMMphlox-Control	778	0.991689	-0.0120409	0.99587	-0.00597062	0.997961	-0.00294485	1.00078	0.00112514	64	0.224787	0.39407	0.404426	0.0496599	FALSE
EMMphlox-Control	780	1.00064	0.000927523	1.00486	0.00699778	1.00398	0.00572415	1.00681	0.00979414	82	0.92757	0.954456	0.0202441	0.0587904	FALSE
EMMphlox-Control	781	0.979399	-0.0300315	0.983528	-0.0239612	0.988964	-0.0160095	0.991758	-0.0119395	71	0.00158584	0.0112595	1.94848	0.0481273	FALSE
EMMphlox-Control	784	1.00447	0.00643576	1.00871	0.012506	1.00683	0.00981674	1.00967	0.0138867	34	0.694153	0.826633	0.0826874	0.0639475	FALSE
EMMphlox-Control	79	1.00768	0.0110431	1.01193	0.0171134	1.00978	0.014047	1.01264	0.018117	40	0.126609	0.276592	0.55816	0.0259946	FALSE
EMMphlox-Control	808	1.00486	0.00699983	1.0091	0.0130701	1.0116	0.0166394	1.01446	0.0207094	47	0.473011	0.641336	0.192914	0.0420968	FALSE
EMMphlox-Control	819	1.00078	0.00111794	1.00499	0.00718819	0.999661	-0.000489044	1.00249	0.00358095	30	0.874847	0.920209	0.0361135	0.0219969	FALSE
EMMphlox-Control	86	1.01125	0.0161454	1.01552	0.0222156	1.00957	0.0137364	1.01242	0.0178063	40	0.0168128	0.0665004	1.17718	0.0231891	FALSE
EMMphlox-Control	87	0.989526	-0.0151911	0.993698	-0.00912082	0.991545	-0.0122497	0.994346	-0.00817973	30	0.113927	0.255226	0.593076	0.032137	FALSE
EMMphlox-Control	90	1.00252	0.00363608	1.00675	0.00970634	1.0031	0.00446345	1.00593	0.00853344	64	0.728476	0.841005	0.0752013	0.0535723	FALSE
EMMphlox-Control	900	1.00216	0.00311387	1.00639	0.00918412	1.00344	0.00496059	1.00628	0.00903058	64	0.799147	0.872914	0.0590285	0.0640649	FALSE
EMMphlox-Control	917	0.998845	-0.0016669	1.00306	0.00440336	1.00108	0.00156249	1.00391	0.00563248	20	0.898409	0.931198	0.030958	0.0381122	FALSE
EMMphlox-Control	93	0.972502	-0.040227	0.976602	-0.0341567	0.967077	-0.0482966	0.96981	-0.0442266	20	0.000243361	0.00321574	2.49272	0.0265737	FALSE
EMMphlox-Control	934	1.0198	0.0282904	1.0241	0.0343606	1.01878	0.0268427	1.02166	0.0309127	61	0.000790889	0.00623923	2.20487	0.0389994	FALSE
EMMphlox-Control	942	0.986591	-0.0194756	0.990751	-0.0134054	0.989193	-0.0156768	0.991987	-0.0116068	20	0.0311988	0.103029	0.987042	0.0234725	FALSE
EMMphlox-Control	965	1.00143	0.00206789	1.00566	0.00813815	1.00748	0.0107501	1.01033	0.0148201	34	0.825661	0.888211	0.0514839	0.0341079	FALSE
EMMphlox-Control	972_control	1	0	1.00422	0.00607025	1	0	1.00283	0.00406999	178	1	1	0	0.0379733	FALSE
EMMphlox-Control	974	1.00825	0.0118497	1.0125	0.0179199	1.00068	0.000985317	1.00351	0.00505531	71	0.344845	0.53811	0.269129	0.0694521	FALSE
EMMphlox-Control	996	1.00089	0.00128936	1.00511	0.00735961	1.00256	0.00368917	1.00539	0.00775917	10	0.850128	0.900882	0.0453319	0.0118136	FALSE
YES-Control	1343	0.930249	-0.104311	0.938153	-0.0921045	0.933816	-0.0987905	0.939489	-0.0900519	37	5.93895e-15	2.10833e-13	12.6761	0.0343266	TRUE
YES-Control	236	0.897712	-0.155675	0.90534	-0.143469	0.904084	-0.145471	0.909577	-0.136733	155	4.81922e-75	6.84329e-73	72.1647	0.0405894	TRUE
YES-Control	989	0.89676	-0.157207	0.904379	-0.145	0.877899	-0.187873	0.883233	-0.179134	118	2.96634e-19	2.1061e-17	16.6765	0.104641	TRUE
YESphlox-Control	1119	0.946179	-0.0798143	0.956369	-0.064361	0.943381	-0.0840869	0.950553	-0.0731604	32	0.000285765	0.000943688	3.02517	0.0751214	TRUE
YESphlox-Control	1343	0.891495	-0.165702	0.901095	-0.150248	0.886459	-0.173874	0.893198	-0.162947	55	1.63588e-22	3.87159e-21	20.4121	0.0508114	TRUE
YESphlox-Control	189	0.942573	-0.0853243	0.952723	-0.069871	0.94775	-0.077421	0.954956	-0.0664944	164	2.96207e-48	2.10307e-46	45.6771	0.0362892	TRUE
YESphlox-Control	236	0.894174	-0.161372	0.903803	-0.145919	0.906864	-0.141043	0.913758	-0.130116	220	5.1557e-86	7.3211e-84	83.1354	0.0513633	TRUE
YESphlox-Control	989	0.912143	-0.132668	0.921966	-0.117215	0.891173	-0.166223	0.897948	-0.155296	195	1.54075e-24	5.46965e-23	22.262	0.104635	TRUE
EMM-Control	1	0.849904	-0.234628	0.862792	-0.212915	0.920225	-0.119941	0.928623	-0.106835	47	7.23982e-07	2.75113e-05	4.56049	0.181377	TRUE
EMM-Control	1234	0.777939	-0.362272	0.789736	-0.340558	0.766338	-0.383948	0.773331	-0.370841	45	3.07229e-16	1.75121e-14	13.7567	0.12197	TRUE
EMM-Control	175	1.05333	0.0749583	1.0693	0.0966722	1.051	0.0717592	1.06059	0.0848657	24	0.0149404	0.0499258	1.30167	0.0995395	TRUE
EMM-Control	236	0.850165	-0.234186	0.863057	-0.212472	0.862535	-0.213345	0.870406	-0.200239	46	8.29841e-20	9.46019e-18	17.0241	0.0707759	TRUE
EMM-Control	989	0.915126	-0.127957	0.929004	-0.106243	0.927078	-0.109237	0.935539	-0.0961309	32	2.9172e-06	4.75087e-05	4.32323	0.084928	TRUE
EMMphlox-Control	1119	0.892236	-0.164502	0.895998	-0.158432	0.889216	-0.169394	0.891728	-0.165324	12	0.000657828	0.0054948	2.26005	0.0801202	TRUE
EMMphlox-Control	1234	0.755606	-0.404294	0.758792	-0.398223	0.762766	-0.390688	0.764921	-0.386618	40	1.49515e-30	1.06156e-28	27.9741	0.0547024	TRUE
EMMphlox-Control	236	0.869406	-0.201898	0.873072	-0.195828	0.871107	-0.199077	0.873568	-0.195007	40	1.13071e-45	1.60561e-43	42.7944	0.0239091	TRUE
EMMphlox-Control	29	1.11355	0.155171	1.11825	0.161242	1.10355	0.142155	1.10667	0.146225	29	1.49938e-05	0.00030416	3.5169	0.117314	TRUE
EMMphlox-Control	311	0.944585	-0.0822472	0.948568	-0.0761769	0.950029	-0.0739568	0.952713	-0.0698868	12	6.3324e-06	0.000149867	3.82429	0.0260997	TRUE
EMMphlox-Control	3461	0.942745	-0.0850599	0.94672	-0.0789896	0.923506	-0.114806	0.926115	-0.110736	12	0.005812	0.0317424	1.49836	0.0582945	TRUE
EMMphlox-Control	4472	0.958567	-0.0610489	0.962609	-0.0549787	0.949658	-0.0745207	0.95234	-0.0704507	18	0.000249106	0.00321574	2.49272	0.038079	TRUE
EMMphlox-Control	5296	0.943092	-0.084529	0.947069	-0.0784588	0.940715	-0.088171	0.943372	-0.084101	12	0.00631578	0.0332163	1.47865	0.0587384	TRUE
EMMphlox-Control	603	0.948447	-0.076361	0.952446	-0.0702908	0.948916	-0.0756471	0.951597	-0.0715771	24	6.56251e-05	0.00116485	2.93373	0.0517523	TRUE
EMMphlox-Control	989	0.924872	-0.112674	0.928772	-0.106604	0.92353	-0.114769	0.926139	-0.110699	42	1.27395e-06	3.61801e-05	4.44153	0.0855057	TRUE
EMMphlox-Control	993	0.935043	-0.0968953	0.938986	-0.090825	0.938532	-0.0915221	0.941183	-0.0874521	18	2.55347e-07	1.20864e-05	4.9177	0.0352936	TRUE

## Sheet: viability_benign
condition_short	RNA_gene	mean_effect_size	mean_effect_size_log2	mean_fitness	mean_fitness_log2	median_effect_size	median_effect_size_log2	median_fitness	median_fitness_log2	observation_count	p_Welch	p_Welch_BH	p_Welch_BH_-log10	stdev_fitness	is_hit
YESphlox-Control	1	1.00399	0.00574454	1.00438	0.00629984	1.00375	0.00539355	1.00373	0.0053709	169	1.0055e-05	6.79911e-05	4.16755	0.0108434	FALSE
YESphlox-Control	103	0.999222	-0.00112266	0.999607	-0.000567354	0.999642	-0.000516728	0.999626	-0.000539377	181	0.320774	0.464794	0.332739	0.00979427	FALSE
YESphlox-Control	1039	0.998617	-0.00199635	0.999002	-0.00144105	0.999441	-0.000806874	0.999425	-0.000829523	266	0.00406007	0.0125333	1.90194	0.006278	FALSE
YESphlox-Control	1064	0.998146	-0.0026774	0.99853	-0.0021221	0.999091	-0.00131177	0.999075	-0.00133442	249	3.64983e-05	0.000215948	3.66565	0.00540073	FALSE
YESphlox-Control	1088	0.997375	-0.00379144	0.997759	-0.00323613	0.999891	-0.000157724	0.999875	-0.000180373	170	0.0208276	0.0537732	1.26943	0.0142102	FALSE
YESphlox-Control	1097	1.00102	0.00146749	1.0014	0.0020228	1.00213	0.00307049	1.00211	0.00304784	51	0.249279	0.372607	0.428749	0.00590939	FALSE
YESphlox-Control	1119	1.01303	0.018683	1.01342	0.0192383	1.00993	0.0142495	1.00991	0.0142269	26	3.04286e-05	0.000187864	3.72616	0.0130783	FALSE
YESphlox-Control	1122	1.00364	0.00523485	1.00402	0.00579016	1.00375	0.00539823	1.00373	0.00537558	205	1.02766e-09	1.8241e-08	7.73895	0.0072133	FALSE
YESphlox-Control	1125	1.00037	0.000532449	1.00075	0.00108775	1.00079	0.00113512	1.00077	0.00111247	182	0.616049	0.747939	0.126134	0.00914196	FALSE
YESphlox-Control	1130	0.99659	-0.00492728	0.996974	-0.00437198	0.997171	-0.00408709	0.997155	-0.00410974	171	8.97891e-09	1.41667e-07	6.84873	0.00653979	FALSE
YESphlox-Control	115	1.00014	0.000204101	1.00053	0.000759405	1.00095	0.00136548	1.00093	0.00134283	164	0.811353	0.907182	0.0423056	0.00664486	FALSE
YESphlox-Control	1154	1.00156	0.00225505	1.00195	0.00281036	1.00157	0.00226417	1.00155	0.00224152	168	0.00185855	0.00643694	2.19132	0.00530175	FALSE
YESphlox-Control	1164	1.00004	5.08065e-05	1.00042	0.00060611	1.00011	0.000165257	1.0001	0.000142608	127	0.959861	0.987683	0.0053825	0.00718894	FALSE
YESphlox-Control	1165	0.99892	-0.00155856	0.999305	-0.00100325	0.999321	-0.000979586	0.999306	-0.00100224	222	0.0288886	0.0695284	1.15784	0.00598093	FALSE
YESphlox-Control	1166	0.998799	-0.00173408	0.999183	-0.00117877	0.999755	-0.000353104	0.99974	-0.000375753	179	0.040179	0.0905621	1.04305	0.00679975	FALSE
YESphlox-Control	12	0.999097	-0.00130282	0.999482	-0.000747515	0.999474	-0.000759277	0.999458	-0.000781926	163	0.0563504	0.117673	0.929324	0.0047906	FALSE
YESphlox-Control	1234	1.00503	0.00723877	1.00542	0.00779408	1.00279	0.00401915	1.00277	0.0039965	179	9.28558e-07	8.24095e-06	5.08402	0.0127553	FALSE
YESphlox-Control	1249	1.00053	0.0007644	1.00092	0.0013197	1.00049	0.000712245	1.00048	0.000689596	177	0.390331	0.541407	0.266476	0.00726303	FALSE
YESphlox-Control	1255	1.00047	0.000674405	1.00085	0.00122971	1.00012	0.000178646	1.00011	0.000155997	202	0.392711	0.541407	0.266476	0.00662169	FALSE
YESphlox-Control	130	1.00015	0.000211855	1.00053	0.000767159	1.00073	0.00105119	1.00071	0.00102854	265	0.797033	0.90576	0.0429868	0.00804436	FALSE
YESphlox-Control	1326	1.00007	0.000107402	1.00046	0.000662706	0.999704	-0.000427622	0.999688	-0.000450272	159	0.911957	0.972426	0.0121437	0.00768027	FALSE
YESphlox-Control	1343	1.03248	0.0461194	1.03288	0.0466747	1.03219	0.0457076	1.03217	0.0456849	46	9.44634e-15	4.47127e-13	12.3496	0.0195418	TRUE
YESphlox-Control	1348	0.997246	-0.00397937	0.997629	-0.00342406	0.999053	-0.00136622	0.999038	-0.00138887	143	4.09531e-06	2.90767e-05	4.53645	0.00609541	FALSE
YESphlox-Control	1361	1.00014	0.000195031	1.00052	0.000750335	1.00055	0.00079332	1.00053	0.000770671	186	0.831368	0.922179	0.0351848	0.0077259	FALSE
YESphlox-Control	137	0.996657	-0.00483096	0.997041	-0.00427565	0.99682	-0.00459489	0.996804	-0.00461754	131	3.70184e-07	4.04355e-06	5.39324	0.00650328	FALSE
YESphlox-Control	1372	1.00103	0.00148649	1.00142	0.0020418	1.00236	0.00339475	1.00234	0.0033721	79	0.336512	0.482674	0.316346	0.00914015	FALSE
YESphlox-Control	1415	1.00086	0.00123858	1.00124	0.00179388	1.0013	0.00188079	1.00129	0.00185814	184	0.0594416	0.122329	0.91247	0.00479612	FALSE
YESphlox-Control	144	0.999364	-0.000917742	0.999749	-0.000362438	0.999814	-0.000268195	0.999798	-0.000290845	87	0.357127	0.50712	0.294889	0.00584006	FALSE
YESphlox-Control	1443	1.00082	0.00118508	1.00121	0.00174039	1.00081	0.0011708	1.0008	0.00114815	215	0.136628	0.236599	0.625987	0.00690939	FALSE
YESphlox-Control	145	1.00243	0.00349494	1.00281	0.00405024	1.00252	0.00362839	1.0025	0.00360574	133	0.000114865	0.00058253	3.23468	0.00630965	FALSE
YESphlox-Control	1460	1.00123	0.00177668	1.00162	0.00233198	1.0013	0.00186849	1.00128	0.00184584	235	0.0488907	0.103619	0.984561	0.00849961	FALSE
YESphlox-Control	1519	0.995721	-0.00618581	0.996105	-0.00563051	0.997246	-0.00397923	0.99723	-0.00400188	168	1.05672e-08	1.50054e-07	6.82375	0.00858179	FALSE
YESphlox-Control	1530	0.999101	-0.00129756	0.999486	-0.000742259	0.999466	-0.000771127	0.99945	-0.000793776	229	0.134161	0.235195	0.628572	0.00796722	FALSE
YESphlox-Control	1559	0.999518	-0.00069543	0.999903	-0.000140126	0.999739	-0.000376022	0.999724	-0.000398671	172	0.431038	0.577429	0.238502	0.00708732	FALSE
YESphlox-Control	1562	1.00065	0.000941389	1.00104	0.00149669	1.00058	0.000830355	1.00056	0.000807706	169	0.210752	0.328866	0.482981	0.00565839	FALSE
YESphlox-Control	1624	0.999979	-3.01788e-05	1.00036	0.000525125	0.999981	-2.79288e-05	0.999965	-5.0578e-05	173	0.968016	0.988909	0.00484385	0.00573693	FALSE
YESphlox-Control	1670	1.00107	0.00153657	1.00145	0.00209188	1.00209	0.00301088	1.00207	0.00298823	266	0.0236774	0.0579689	1.2368	0.00608444	FALSE
YESphlox-Control	168	0.998157	-0.0026609	0.998542	-0.0021056	0.999099	-0.00130068	0.999083	-0.00132333	123	0.00245363	0.00810267	2.09137	0.00586163	FALSE
YESphlox-Control	1696	1.00032	0.000466325	1.00071	0.00102163	1.00057	0.000826418	1.00056	0.000803769	230	0.511746	0.666678	0.176084	0.00608283	FALSE
YESphlox-Control	175	0.998133	-0.0026955	0.998518	-0.0021402	0.99997	-4.39018e-05	0.999954	-6.6551e-05	79	0.118203	0.20981	0.678175	0.0102078	FALSE
YESphlox-Control	177	1.00064	0.00091744	1.00102	0.00147274	1.00104	0.0015014	1.00103	0.00147875	175	0.191172	0.308481	0.510771	0.00519895	FALSE
YESphlox-Control	187	1.00044	0.000631518	1.00082	0.00118682	0.999865	-0.000194232	0.99985	-0.000216881	169	0.444285	0.589612	0.229434	0.00643746	FALSE
YESphlox-Control	188	1.00116	0.00167819	1.00155	0.0022335	1.00177	0.00254415	1.00175	0.0025215	46	0.102302	0.186243	0.72992	0.00435247	FALSE
YESphlox-Control	189	1.00103	0.00148112	1.00141	0.00203642	1.00223	0.00320703	1.00221	0.00318438	122	0.157647	0.266498	0.574307	0.00734669	FALSE
YESphlox-Control	190	1.00088	0.00126482	1.00126	0.00182013	1.00086	0.00124223	1.00085	0.00121958	173	0.179526	0.293019	0.533105	0.00770679	FALSE
YESphlox-Control	194	0.998927	-0.00154913	0.999311	-0.000993823	0.999225	-0.00111901	0.999209	-0.00114166	123	0.0391938	0.0897664	1.04689	0.00478851	FALSE
YESphlox-Control	230	0.999391	-0.000879574	0.999775	-0.00032427	1.00058	0.000840223	1.00057	0.000817574	26	0.53632	0.686103	0.163611	0.00475101	FALSE
YESphlox-Control	236	0.997215	-0.00402287	0.997599	-0.00346756	0.997651	-0.00339221	0.997636	-0.00341485	174	0.000187141	0.000830436	3.08069	0.00891751	FALSE
YESphlox-Control	239	1.00079	0.00113859	1.00117	0.00169389	1.00068	0.000978893	1.00066	0.000956244	123	0.231442	0.349625	0.456398	0.00657091	FALSE
YESphlox-Control	242	1.00004	6.47334e-05	1.00043	0.000620037	1.00015	0.000213806	1.00013	0.000191157	91	0.956985	0.987683	0.0053825	0.00743756	FALSE
YESphlox-Control	248	0.998375	-0.00234576	0.99876	-0.00179045	0.999819	-0.000261175	0.999803	-0.000283825	129	0.0315327	0.0746273	1.1271	0.00787208	FALSE
YESphlox-Control	253	1.00026	0.000369232	1.00064	0.000924536	1.00047	0.000675556	1.00045	0.000652907	26	0.749812	0.872732	0.0591193	0.00378963	FALSE
YESphlox-Control	254	0.998718	-0.00185134	0.999102	-0.00129604	0.999992	-1.11416e-05	0.999977	-3.37908e-05	126	0.0623636	0.126509	0.897878	0.00697693	FALSE
YESphlox-Control	256	0.998594	-0.00202943	0.998979	-0.00147413	0.999612	-0.000560269	0.999596	-0.000582919	174	0.0174676	0.0459333	1.33787	0.00678214	FALSE
YESphlox-Control	26	1.00026	0.000371878	1.00064	0.000927182	1.00041	0.000597094	1.0004	0.000574445	87	0.677928	0.808956	0.0920749	0.00512821	FALSE
YESphlox-Control	264	0.999713	-0.000413961	1.0001	0.000141343	1.0003	0.000430514	1.00028	0.000407865	52	0.747054	0.872732	0.0591193	0.00604735	FALSE
YESphlox-Control	282	0.996567	-0.00496157	0.99695	-0.00440626	0.997791	-0.00319071	0.997775	-0.00321336	195	0.000119974	0.00058746	3.23102	0.0115985	FALSE
YESphlox-Control	284	0.997017	-0.00431001	0.997401	-0.0037547	0.99765	-0.00339453	0.997634	-0.00341718	108	1.80484e-05	0.000116494	3.9337	0.00635094	FALSE
YESphlox-Control	289	1.0011	0.00158077	1.00148	0.00213607	1.00112	0.00161626	1.00111	0.00159361	173	0.0859459	0.160583	0.7943	0.00747708	FALSE
YESphlox-Control	29	1.00007	9.97087e-05	1.00045	0.000655013	1.0001	0.000148452	1.00009	0.000125803	64	0.914052	0.972426	0.0121437	0.00457164	FALSE
YESphlox-Control	30	1	3.79699e-07	1.00039	0.000555684	1.00072	0.00104087	1.00071	0.00101822	220	0.9997	1	0	0.00946572	FALSE
YESphlox-Control	31	0.995523	-0.00647354	0.995906	-0.00591823	0.997362	-0.003811	0.997346	-0.00383365	139	6.14979e-10	1.24753e-08	7.90395	0.00738624	FALSE
YESphlox-Control	311	0.999785	-0.000310804	1.00017	0.0002445	1.00042	0.000609423	1.00041	0.000586774	26	0.797324	0.90576	0.0429868	0.00398501	FALSE
YESphlox-Control	318	1.00201	0.00289022	1.00239	0.00344552	1.00144	0.00208158	1.00143	0.00205893	13	0.0809697	0.155374	0.808621	0.00370363	FALSE
YESphlox-Control	3205	0.995329	-0.00675482	0.995712	-0.00619952	0.99545	-0.00657994	0.995434	-0.00660259	26	0.00419947	0.0126878	1.89661	0.00747756	FALSE
YESphlox-Control	323	0.994068	-0.00858398	0.99445	-0.00802868	0.994041	-0.00862332	0.994025	-0.00864597	46	5.92371e-10	1.24753e-08	7.90395	0.00508908	FALSE
YESphlox-Control	335	1.00114	0.00164998	1.00153	0.00220529	1.00156	0.00224708	1.00154	0.00222444	159	0.260711	0.385635	0.413824	0.0122771	FALSE
YESphlox-Control	3461	1.0037	0.00532587	1.00408	0.00588117	1.00161	0.00232519	1.0016	0.00230254	25	0.0462174	0.0994374	1.00245	0.0087085	FALSE
YESphlox-Control	37	1.00054	0.000783795	1.00093	0.0013391	1.00071	0.00102665	1.0007	0.001004	86	0.642581	0.773275	0.111666	0.0104993	FALSE
YESphlox-Control	377	0.993733	-0.00906928	0.994116	-0.00851398	0.995488	-0.00652457	0.995472	-0.00654722	41	1.55137e-06	1.29585e-05	4.88745	0.00703927	FALSE
YESphlox-Control	382	1.00224	0.00323521	1.00263	0.00379051	1.00213	0.00306453	1.00211	0.00304188	137	8.22534e-05	0.000432592	3.36392	0.00564516	FALSE
YESphlox-Control	383	0.997689	-0.00333816	0.998073	-0.00278286	0.998183	-0.00262422	0.998167	-0.00264687	174	7.44029e-05	0.000406354	3.3911	0.00658714	FALSE
YESphlox-Control	388	0.993807	-0.00896231	0.99419	-0.00840701	0.995223	-0.00690819	0.995207	-0.00693084	317	6.63927e-32	9.42776e-30	29.0256	0.00726776	FALSE
YESphlox-Control	389	1.00166	0.00239573	1.00205	0.00295103	1.00167	0.00240011	1.00165	0.00237746	120	0.00623532	0.0184461	1.73409	0.00579478	FALSE
YESphlox-Control	394	1.0008	0.00115845	1.00119	0.00171375	1.00113	0.001624	1.00111	0.00160135	192	0.141583	0.242226	0.615779	0.00643697	FALSE
YESphlox-Control	399	0.997905	-0.00302559	0.998289	-0.00247028	0.998351	-0.00238139	0.998335	-0.00240403	128	0.000959038	0.00358377	2.44566	0.00629107	FALSE
YESphlox-Control	400	1.0001	0.000140254	1.00048	0.000695557	1.00055	0.000786823	1.00053	0.000764174	133	0.872169	0.945404	0.0243825	0.00613252	FALSE
YESphlox-Control	401	0.996162	-0.00554776	0.996545	-0.00499246	0.997977	-0.00292149	0.997961	-0.00294414	234	3.22814e-10	9.16791e-09	8.03773	0.00797473	FALSE
YESphlox-Control	402	1.00142	0.00205115	1.00181	0.00260645	1.00123	0.00177048	1.00121	0.00174783	133	0.0105439	0.0282497	1.54899	0.00544801	FALSE
YESphlox-Control	405	0.99942	-0.000837232	0.999805	-0.000281928	0.998856	-0.00165121	0.99884	-0.00167386	25	0.616259	0.747939	0.126134	0.00554286	FALSE
YESphlox-Control	410	0.999101	-0.00129771	0.999486	-0.000742404	0.999515	-0.000699813	0.999499	-0.000722462	178	0.0668795	0.131901	0.879751	0.00530019	FALSE
YESphlox-Control	412	1.00102	0.00147027	1.00141	0.00202557	1.00106	0.00153386	1.00105	0.00151121	86	0.0708253	0.13777	0.860846	0.00447285	FALSE
YESphlox-Control	414	1.00129	0.0018599	1.00168	0.00241521	1.00103	0.00147966	1.00101	0.00145701	162	0.0101556	0.0277326	1.55701	0.00520916	FALSE
YESphlox-Control	421	1.00128	0.00184764	1.00167	0.00240295	1.0018	0.00259259	1.00178	0.00256994	46	0.226299	0.345531	0.461512	0.00683213	FALSE
YESphlox-Control	426	0.99998	-2.90457e-05	1.00036	0.000526258	0.999524	-0.000686725	0.999508	-0.000709374	127	0.979815	0.993813	0.00269542	0.00835815	FALSE
YESphlox-Control	4302	1.0003	0.000425913	1.00068	0.000981217	1.00098	0.00140922	1.00096	0.00138657	38	0.807425	0.907182	0.0423056	0.00721036	FALSE
YESphlox-Control	4320	1.00126	0.00182377	1.00165	0.00237907	1.00157	0.00226795	1.00156	0.0022453	51	0.0449121	0.0981156	1.00826	0.00393775	FALSE
YESphlox-Control	4472	0.998961	-0.0014991	0.999346	-0.000943794	0.999815	-0.000266484	0.9998	-0.000289133	38	0.49968	0.656987	0.182443	0.0092349	FALSE
YESphlox-Control	452	1.0013	0.00187491	1.00169	0.00243021	1.00157	0.0022676	1.00156	0.00224495	168	0.0100746	0.0277326	1.55701	0.00536074	FALSE
YESphlox-Control	46	0.999258	-0.00107112	0.999643	-0.000515814	0.999343	-0.000947732	0.999328	-0.000970381	223	0.163915	0.273834	0.562513	0.00670743	FALSE
YESphlox-Control	463	1.03065	0.0435476	1.03104	0.0441029	1.00329	0.00474263	1.00328	0.00471998	225	2.1845e-11	7.75498e-10	9.11042	0.0651099	FALSE
YESphlox-Control	475	0.997201	-0.00404366	0.997585	-0.00348835	0.997158	-0.00410655	0.997142	-0.0041292	128	2.96929e-07	3.51366e-06	5.45424	0.00506423	FALSE
YESphlox-Control	5036	1.00107	0.00153646	1.00145	0.00209177	1.00116	0.00166873	1.00114	0.00164608	38	0.387089	0.541407	0.266476	0.00730785	FALSE
YESphlox-Control	5040	0.99714	-0.00413273	0.997523	-0.00357742	0.998014	-0.00286811	0.997998	-0.00289076	39	0.000129341	0.000609021	3.21537	0.00395484	FALSE
YESphlox-Control	5041	1.00018	0.000264256	1.00057	0.00081956	1.00028	0.000409176	1.00027	0.000386527	52	0.791502	0.90576	0.0429868	0.00453408	FALSE
YESphlox-Control	507	1.00059	0.000846614	1.00097	0.00140192	1.00054	0.00077759	1.00052	0.00075494	169	0.209089	0.328866	0.482981	0.00479645	FALSE
YESphlox-Control	51	0.99899	-0.00145854	0.999374	-0.000903236	0.999897	-0.000148707	0.999881	-0.000171356	86	0.0981699	0.181041	0.742224	0.00496709	FALSE
YESphlox-Control	515	1.00046	0.000656377	1.00084	0.00121168	1.00039	0.000562527	1.00037	0.000539877	179	0.425366	0.575256	0.240139	0.00660279	FALSE
YESphlox-Control	524	1.00236	0.00340171	1.00275	0.00395701	1.0027	0.00389692	1.00269	0.00387427	82	0.00868647	0.0246696	1.60784	0.00755936	FALSE
YESphlox-Control	5296	0.998306	-0.00244583	0.99869	-0.00189053	1	6.16086e-06	0.999989	-1.64883e-05	26	0.173582	0.286612	0.542705	0.00601389	FALSE
YESphlox-Control	534	0.998971	-0.0014851	0.999356	-0.000929794	0.99988	-0.000173019	0.999864	-0.000195668	199	0.210494	0.328866	0.482981	0.0108401	FALSE
YESphlox-Control	538	0.999597	-0.000581203	0.999982	-2.58989e-05	1.00018	0.000258279	1.00016	0.00023563	235	0.563318	0.707538	0.15025	0.00973659	FALSE
YESphlox-Control	539	1.00132	0.00190527	1.00171	0.00246057	1.00103	0.00148935	1.00102	0.00146671	208	0.023457	0.0579689	1.2368	0.0072928	FALSE
YESphlox-Control	549	1.0014	0.00202114	1.00179	0.00257644	1.00105	0.0015114	1.00103	0.00148875	37	0.273616	0.400551	0.397342	0.00748594	FALSE
YESphlox-Control	59	0.995906	-0.005919	0.996289	-0.00536369	0.998359	-0.00236904	0.998344	-0.00239169	173	5.94858e-05	0.000337879	3.47124	0.0125876	FALSE
YESphlox-Control	5916	0.999379	-0.000895773	0.999764	-0.000340469	1.00088	0.0012643	1.00086	0.00124165	26	0.560244	0.707538	0.15025	0.00517192	FALSE
YESphlox-Control	601	1.00005	6.57095e-05	1.00043	0.000621013	1.00059	0.000851244	1.00057	0.000828595	132	0.935324	0.983822	0.00708355	0.00554434	FALSE
YESphlox-Control	603	0.999852	-0.000213502	1.00024	0.000341802	1.00043	0.000618872	1.00041	0.000596223	52	0.847086	0.925278	0.0337276	0.00511506	FALSE
YESphlox-Control	628	0.996139	-0.00558156	0.996522	-0.00502625	0.997641	-0.00340744	0.997625	-0.00343009	128	6.3071e-07	6.3972e-06	5.19401	0.00780455	FALSE
YESphlox-Control	6379	0.999714	-0.000412112	1.0001	0.000143192	1.00001	1.36979e-05	0.999994	-8.95133e-06	39	0.687366	0.813383	0.0897049	0.00403267	FALSE
YESphlox-Control	650	0.997875	-0.003069	0.998259	-0.0025137	0.998076	-0.00277908	0.99806	-0.00280173	111	0.00764355	0.0221507	1.65461	0.00771233	FALSE
YESphlox-Control	6596	0.99769	-0.00333685	0.998074	-0.00278155	0.997977	-0.00292097	0.997962	-0.00294362	26	0.0354057	0.0824199	1.08397	0.00513918	FALSE
YESphlox-Control	7	0.995034	-0.00718229	0.995417	-0.00662699	0.995731	-0.00617174	0.995716	-0.00619439	26	0.000132955	0.000609021	3.21537	0.00555278	FALSE
YESphlox-Control	720	1.00635	0.00913305	1.00674	0.00968835	1.00611	0.00879362	1.0061	0.00877097	83	8.55122e-07	8.09515e-06	5.09178	0.0106468	FALSE
YESphlox-Control	737	0.998317	-0.0024302	0.998701	-0.0018749	0.998607	-0.00201061	0.998592	-0.00203326	205	0.00108333	0.00394445	2.40401	0.00607348	FALSE
YESphlox-Control	738	1.00262	0.00376842	1.003	0.00432373	1.00093	0.00134521	1.00092	0.00132256	167	0.0216297	0.0548467	1.26085	0.0141244	FALSE
YESphlox-Control	745	0.998732	-0.00183037	0.999117	-0.00127506	0.998798	-0.00173573	0.998782	-0.00175837	172	0.0823114	0.155843	0.807313	0.00876575	FALSE
YESphlox-Control	7506	0.999392	-0.000877613	0.999777	-0.000322309	0.99844	-0.00225186	0.998425	-0.00227451	25	0.532034	0.686103	0.163611	0.00459181	FALSE
YESphlox-Control	7507	0.999484	-0.00074438	0.999869	-0.000189076	0.999918	-0.000117775	0.999903	-0.000140424	51	0.568023	0.707538	0.15025	0.00608649	FALSE
YESphlox-Control	767	1.00029	0.000422931	1.00068	0.000978235	1.00082	0.00117778	1.0008	0.00115513	173	0.578257	0.714021	0.146289	0.00582432	FALSE
YESphlox-Control	7767	1.00241	0.00347857	1.0028	0.00403388	1.00119	0.00171078	1.00117	0.00168813	65	0.0437441	0.0970573	1.01297	0.00920193	FALSE
YESphlox-Control	778	0.996151	-0.00556383	0.996534	-0.00500853	0.998994	-0.00145273	0.998978	-0.00147538	224	0.000232566	0.000971303	3.01265	0.0148349	FALSE
YESphlox-Control	780	1.0182	0.0260229	1.01859	0.0265782	0.998798	-0.00173526	0.998782	-0.00175791	314	8.01581e-08	1.03477e-06	5.98516	0.0584963	FALSE
YESphlox-Control	781	0.998448	-0.00224045	0.998833	-0.00168514	0.999233	-0.00110736	0.999217	-0.00113001	293	0.00295045	0.00952191	2.02128	0.00743248	FALSE
YESphlox-Control	784	0.997722	-0.0032906	0.998106	-0.0027353	0.998707	-0.00186672	0.998691	-0.00188936	93	0.000848844	0.00325773	2.48709	0.00582257	FALSE
YESphlox-Control	79	1.00017	0.000244692	1.00055	0.000799996	0.998131	-0.00269889	0.998115	-0.00272154	158	0.917641	0.972426	0.0121437	0.0202798	FALSE
YESphlox-Control	808	0.998161	-0.00265614	0.998545	-0.00210084	0.999222	-0.00112221	0.999207	-0.00114486	160	0.000491015	0.00199212	2.70068	0.00552984	FALSE
YESphlox-Control	819	1.00106	0.00152445	1.00144	0.00207975	1.00104	0.0015055	1.00103	0.00148285	128	0.0632829	0.126566	0.897684	0.00553522	FALSE
YESphlox-Control	86	1.00168	0.00242605	1.00207	0.00298135	1.00172	0.00248207	1.00171	0.00245943	177	0.00146118	0.00518719	2.28507	0.00585454	FALSE
YESphlox-Control	87	1.00258	0.00371835	1.00297	0.00427365	1.00179	0.00258057	1.00177	0.00255792	132	0.00221044	0.0074734	2.12648	0.00895962	FALSE
YESphlox-Control	90	0.999208	-0.00114368	0.999592	-0.000588374	1.0009	0.0012913	1.00088	0.00126865	226	0.215551	0.332698	0.477949	0.00859003	FALSE
YESphlox-Control	900	0.99671	-0.0047538	0.997094	-0.00419849	0.998686	-0.00189704	0.99867	-0.00191969	231	1.76966e-06	1.39606e-05	4.85509	0.0093197	FALSE
YESphlox-Control	917	0.997685	-0.00334398	0.998069	-0.00278868	0.997929	-0.00299119	0.997913	-0.00301384	87	0.00370855	0.0117025	1.93172	0.00678604	FALSE
YESphlox-Control	93	1.00137	0.00197535	1.00176	0.00253065	1.00073	0.00105434	1.00072	0.00103169	92	0.114383	0.205599	0.686979	0.00779567	FALSE
YESphlox-Control	934	0.999959	-5.98634e-05	1.00034	0.000495441	0.999691	-0.000445906	0.999675	-0.000468555	176	0.944597	0.986271	0.00600384	0.00694995	FALSE
YESphlox-Control	942	0.997006	-0.00432566	0.99739	-0.00377036	0.997457	-0.00367345	0.997441	-0.0036961	92	0.000210938	0.000907674	3.04207	0.00699871	FALSE
YESphlox-Control	965	0.996026	-0.00574532	0.996409	-0.00519001	0.997909	-0.00302019	0.997893	-0.00304284	97	3.08005e-06	2.30193e-05	4.63791	0.00750141	FALSE
YESphlox-Control	972_control	1	0	1.00038	0.000555304	1	0	0.999984	-2.26492e-05	704	1	1	0	0.00758515	FALSE
YESphlox-Control	974	0.997742	-0.0032606	0.998127	-0.0027053	0.999543	-0.000660114	0.999527	-0.000682764	266	0.000632898	0.00249643	2.60268	0.00962279	FALSE
YESphlox-Control	989	1.03299	0.0468293	1.03339	0.0473846	1.02013	0.0287498	1.02011	0.0287272	157	6.8821e-20	4.88629e-18	17.311	0.0392546	TRUE
YESphlox-Control	993	0.999295	-0.00101705	0.99968	-0.000461751	1.00013	0.000182645	1.00011	0.000159996	39	0.397268	0.542424	0.265661	0.00483646	FALSE
YESphlox-Control	996	0.999869	-0.000189672	1.00025	0.000365631	1.00058	0.000840769	1.00057	0.00081812	41	0.837754	0.922179	0.0351848	0.0036634	FALSE
EMMphlox-Control	1	1.0086	0.0123548	1.00627	0.00902191	1.01619	0.0231747	1.01361	0.0194965	18	0.244557	0.490574	0.309295	0.0298875	FALSE
EMMphlox-Control	103	1.00962	0.0138118	1.00729	0.0104789	1.0078	0.0112069	1.00523	0.00752867	37	0.000109357	0.00776433	2.1099	0.012362	FALSE
EMMphlox-Control	1039	1.00341	0.00490575	1.00109	0.00157286	1.00209	0.0030102	0.999537	-0.00066799	44	0.102083	0.325928	0.486879	0.0114947	FALSE
EMMphlox-Control	1064	0.99945	-0.000793613	0.997144	-0.0041265	0.998472	-0.00220608	0.99593	-0.00588427	26	0.805078	0.905109	0.043299	0.00976074	FALSE
EMMphlox-Control	1088	0.996114	-0.00561673	0.993816	-0.00894962	1.00007	0.000105109	0.997526	-0.00357308	19	0.297381	0.541386	0.266493	0.0150793	FALSE
EMMphlox-Control	1097	1.00918	0.0131802	1.00685	0.00984736	1.00725	0.0104156	1.00468	0.00673741	20	0.0117295	0.0940691	1.02655	0.0141666	FALSE
EMMphlox-Control	1119	1.02818	0.0400952	1.02581	0.0367623	1.0313	0.0444614	1.02867	0.0407832	10	0.00476843	0.0939335	1.02718	0.0239457	FALSE
EMMphlox-Control	1122	1.00609	0.008755	1.00377	0.00542211	1.00894	0.0128375	1.00637	0.00915936	32	0.00529203	0.0939335	1.02718	0.0100643	FALSE
EMMphlox-Control	1125	1.0092	0.0132069	1.00687	0.00987405	1.00602	0.00866473	1.00346	0.00498655	24	0.0106375	0.0940691	1.02655	0.0155389	FALSE
EMMphlox-Control	1130	1.0001	0.000141976	0.997791	-0.00319091	1.00012	0.000172988	0.997573	-0.0035052	20	0.975771	0.989711	0.00449174	0.0134323	FALSE
EMMphlox-Control	115	1.00287	0.00414153	1.00056	0.000808644	1.00274	0.00394577	1.00019	0.000267586	16	0.307763	0.546279	0.262586	0.0100513	FALSE
EMMphlox-Control	1154	1.00411	0.00591632	1.00179	0.00258343	1.00617	0.00887433	1.00361	0.00519615	20	0.22622	0.476385	0.322042	0.0139122	FALSE
EMMphlox-Control	1164	1.00541	0.00778556	1.00309	0.00445267	1.00518	0.00746068	1.00263	0.00378249	14	0.0823704	0.307805	0.511724	0.0101575	FALSE
EMMphlox-Control	1165	1.00002	2.39851e-05	0.997709	-0.0033089	0.998	-0.0028879	0.995459	-0.00656609	28	0.994758	1	0	0.0119239	FALSE
EMMphlox-Control	1166	1.00361	0.00519873	1.00129	0.00186584	1.00422	0.00607674	1.00166	0.00239855	22	0.146464	0.392412	0.406257	0.0101105	FALSE
EMMphlox-Control	12	0.999029	-0.00140142	0.996724	-0.00473431	0.9985	-0.00216618	0.995957	-0.00584437	16	0.652627	0.850212	0.0704728	0.00728015	FALSE
EMMphlox-Control	1234	1.06764	0.0944223	1.06517	0.0910895	1.06797	0.0948647	1.06525	0.0911865	22	3.99424e-10	5.67183e-08	7.24628	0.0295954	TRUE
EMMphlox-Control	1249	1.00032	0.000465846	0.998015	-0.00286704	0.996933	-0.00443184	0.994394	-0.00811003	22	0.921412	0.957319	0.0189433	0.0142647	FALSE
EMMphlox-Control	1255	1.0011	0.00158746	0.998791	-0.00174543	1.00192	0.00276055	0.999364	-0.000917638	31	0.645024	0.850212	0.0704728	0.011672	FALSE
EMMphlox-Control	130	1.00643	0.00925005	1.00411	0.00591716	1.00714	0.010268	1.00458	0.00658978	44	0.101392	0.325928	0.486879	0.0244422	FALSE
EMMphlox-Control	1326	1.00476	0.00684401	1.00244	0.00351112	1.00571	0.00820777	1.00314	0.00452958	26	0.119691	0.36162	0.441747	0.0140638	FALSE
EMMphlox-Control	1343	0.996618	-0.00488688	0.994319	-0.00821977	0.996328	-0.00530676	0.993791	-0.00898495	6	0.307339	0.546279	0.262586	0.00696576	FALSE
EMMphlox-Control	1348	1.00371	0.00534544	1.0014	0.00201255	1.00298	0.00429146	1.00043	0.000613279	32	0.166746	0.409398	0.387854	0.0135348	FALSE
EMMphlox-Control	1361	1.00628	0.00902757	1.00396	0.00569468	1.00526	0.00756283	1.0027	0.00388464	38	0.0198836	0.117054	0.931614	0.014576	FALSE
EMMphlox-Control	137	0.99698	-0.00436409	0.994679	-0.00769698	0.99976	-0.000346582	0.997214	-0.00402477	16	0.207421	0.44627	0.350403	0.0081964	FALSE
EMMphlox-Control	1372	0.992992	-0.0101465	0.9907	-0.0134794	0.99616	-0.00555083	0.993623	-0.00922902	8	0.185434	0.43886	0.357674	0.0132546	FALSE
EMMphlox-Control	1415	1.00315	0.00453925	1.00084	0.00120636	1.00392	0.00564886	1.00137	0.00197067	36	0.159027	0.403248	0.394428	0.0114504	FALSE
EMMphlox-Control	144	1.00779	0.011193	1.00546	0.00786012	1.00807	0.0115953	1.0055	0.00791714	10	0.0216237	0.118099	0.927755	0.00865029	FALSE
EMMphlox-Control	1443	1.00717	0.0103026	1.00484	0.00696968	1.00812	0.0116648	1.00555	0.00798663	48	0.000613517	0.0217798	1.66195	0.0116564	FALSE
EMMphlox-Control	145	1.00849	0.0122037	1.00617	0.00887077	1.00833	0.0119716	1.00577	0.00829345	16	0.136795	0.388499	0.41061	0.0212092	FALSE
EMMphlox-Control	1460	1.00291	0.00419416	1.0006	0.00086127	1.00478	0.0068851	1.00223	0.00320691	44	0.235061	0.483749	0.31538	0.0143153	FALSE
EMMphlox-Control	1519	1.00131	0.00189084	0.999001	-0.00144205	1.00399	0.00574612	1.00143	0.00206793	18	0.704224	0.869736	0.0606127	0.0136455	FALSE
EMMphlox-Control	1530	1.00279	0.00402299	1.00048	0.000690098	1.00081	0.00117059	0.998263	-0.0025076	42	0.357092	0.587505	0.230988	0.0180746	FALSE
EMMphlox-Control	1559	1.00685	0.00985015	1.00453	0.00651726	1.00867	0.012448	1.0061	0.00876978	20	0.0103592	0.0940691	1.02655	0.00999816	FALSE
EMMphlox-Control	1562	1.00338	0.00487472	1.00107	0.00154183	1.00143	0.00206426	0.998882	-0.00161392	18	0.266533	0.511456	0.291192	0.0116741	FALSE
EMMphlox-Control	1624	0.998581	-0.00204824	0.996277	-0.00538113	0.996577	-0.00494699	0.994039	-0.00862518	20	0.568486	0.776201	0.110026	0.00980268	FALSE
EMMphlox-Control	1670	0.999591	-0.000589885	0.997285	-0.00392278	1.00001	1.91479e-05	0.997467	-0.00365904	43	0.887116	0.957319	0.0189433	0.0173035	FALSE
EMMphlox-Control	168	1.00045	0.000645261	0.998139	-0.00268763	0.996109	-0.00562475	0.993572	-0.00930294	12	0.909598	0.957319	0.0189433	0.0127961	FALSE
EMMphlox-Control	1696	1.00291	0.0041963	1.0006	0.00086341	1.00304	0.00437517	1.00048	0.000696987	42	0.193613	0.443437	0.353168	0.0124372	FALSE
EMMphlox-Control	175	1.00825	0.0118543	1.00592	0.00852143	1.00667	0.00958831	1.0041	0.00591012	8	0.0307179	0.155783	0.807479	0.0085412	FALSE
EMMphlox-Control	177	1.00629	0.00904577	1.00397	0.00571288	1.00638	0.00916843	1.00381	0.00549025	32	0.0083919	0.0940691	1.02655	0.0113399	FALSE
EMMphlox-Control	187	1.00721	0.0103591	1.00488	0.00702621	1.00593	0.00853042	1.00337	0.00485223	18	0.0119816	0.0940691	1.02655	0.0102237	FALSE
EMMphlox-Control	188	0.999179	-0.00118474	0.996874	-0.00451763	0.999187	-0.00117322	0.996643	-0.00485141	6	0.796773	0.905109	0.043299	0.0069759	FALSE
EMMphlox-Control	189	1.0051	0.00733814	1.00278	0.00400525	1.00822	0.0118132	1.00565	0.00813506	12	0.103069	0.325928	0.486879	0.00939999	FALSE
EMMphlox-Control	190	0.999772	-0.000328455	0.997465	-0.00366135	0.998985	-0.00146552	0.996441	-0.00514371	20	0.923611	0.957319	0.0189433	0.00927436	FALSE
EMMphlox-Control	194	0.997183	-0.0040703	0.994882	-0.00740319	0.998244	-0.00253601	0.995702	-0.00621419	12	0.248742	0.490574	0.309295	0.00721644	FALSE
EMMphlox-Control	230	1.00524	0.00754594	1.00292	0.00421305	1.00316	0.00455123	1.00061	0.000873043	10	0.0822384	0.307805	0.511724	0.00804162	FALSE
EMMphlox-Control	236	1.00188	0.00270965	0.999568	-0.000623237	1.00555	0.00798686	1.00299	0.00430867	20	0.715895	0.869736	0.0606127	0.0221943	FALSE
EMMphlox-Control	239	1.00282	0.00406659	1.00051	0.000733699	1.00389	0.00559576	1.00133	0.00191757	14	0.490516	0.703568	0.152694	0.0143306	FALSE
EMMphlox-Control	242	1.00921	0.0132199	1.00688	0.00988697	1.00774	0.0111269	1.00518	0.00744874	12	0.00130171	0.0369686	1.43217	0.00739455	FALSE
EMMphlox-Control	248	1.0005	0.000727761	0.998196	-0.00260513	0.998104	-0.00273776	0.995563	-0.00641594	15	0.89115	0.957319	0.0189433	0.013368	FALSE
EMMphlox-Control	253	0.996973	-0.004374	0.994672	-0.00770689	0.999096	-0.00130469	0.996552	-0.00498287	10	0.466894	0.690614	0.160765	0.0121622	FALSE
EMMphlox-Control	254	0.999059	-0.00135867	0.996753	-0.00469156	0.997647	-0.00339879	0.995107	-0.00707697	14	0.791338	0.905109	0.043299	0.0123912	FALSE
EMMphlox-Control	256	0.996793	-0.00463389	0.994493	-0.00796678	0.998075	-0.00278004	0.995534	-0.00645823	22	0.197124	0.444312	0.352312	0.0101554	FALSE
EMMphlox-Control	26	1.00382	0.00550598	1.00151	0.00217309	1.00147	0.00212102	0.998921	-0.00155717	10	0.228128	0.476385	0.322042	0.00883392	FALSE
EMMphlox-Control	264	1.00117	0.00168194	0.998856	-0.00165095	1.00238	0.00343122	0.999829	-0.000246965	20	0.665163	0.854494	0.0682909	0.0108239	FALSE
EMMphlox-Control	282	1.00306	0.00440579	1.00074	0.0010729	1.00324	0.00466134	1.00068	0.000983156	28	0.378121	0.590035	0.229122	0.0171082	FALSE
EMMphlox-Control	284	0.997307	-0.00389009	0.995006	-0.00722298	0.99832	-0.00242524	0.995778	-0.00610343	18	0.404278	0.617285	0.209514	0.0125587	FALSE
EMMphlox-Control	289	1.00252	0.00363566	1.00021	0.00030277	1.00128	0.0018401	0.998727	-0.00183809	21	0.479929	0.695408	0.15776	0.0152657	FALSE
EMMphlox-Control	29	0.996866	-0.00452875	0.994566	-0.00786164	0.999131	-0.00125485	0.996587	-0.00493303	25	0.204778	0.44627	0.350403	0.0107855	FALSE
EMMphlox-Control	30	1.00674	0.00969532	1.00442	0.00636243	1.00462	0.00665051	1.00206	0.00297233	38	0.0143801	0.10089	0.996151	0.0149073	FALSE
EMMphlox-Control	31	1.00435	0.00626437	1.00203	0.00293148	1.00415	0.00597764	1.0016	0.00229945	30	0.0670607	0.280077	0.552722	0.0111535	FALSE
EMMphlox-Control	311	0.998311	-0.00243872	0.996007	-0.00577161	1.00002	2.93845e-05	0.997474	-0.0036488	10	0.6838	0.86696	0.0620008	0.0122361	FALSE
EMMphlox-Control	318	0.99509	-0.00710138	0.992794	-0.0104343	0.998715	-0.00185574	0.996172	-0.00553392	5	0.331723	0.576407	0.239271	0.00977564	FALSE
EMMphlox-Control	3205	0.998651	-0.00194709	0.996347	-0.00527998	0.99844	-0.00225273	0.995897	-0.00593092	10	0.66795	0.854494	0.0682909	0.0090225	FALSE
EMMphlox-Control	323	0.999439	-0.000809365	0.997133	-0.00414225	0.998324	-0.00242029	0.995782	-0.00609847	6	0.90585	0.957319	0.0189433	0.0107474	FALSE
EMMphlox-Control	335	1.0048	0.00690683	1.00248	0.00357394	1.00584	0.00839895	1.00328	0.00472077	15	0.0368215	0.174289	0.758731	0.00723943	FALSE
EMMphlox-Control	3461	1.00342	0.00492367	1.0011	0.00159078	0.999845	-0.000223568	0.997299	-0.00390175	10	0.503923	0.71557	0.145348	0.0151598	FALSE
EMMphlox-Control	37	0.999801	-0.000286604	0.997494	-0.00361949	0.999068	-0.00134509	0.996524	-0.00502327	10	0.94657	0.966999	0.0145738	0.00847164	FALSE
EMMphlox-Control	377	0.997222	-0.00401335	0.994921	-0.00734624	0.998867	-0.00163513	0.996324	-0.00531331	4	0.403126	0.617285	0.209514	0.00551462	FALSE
EMMphlox-Control	382	1.00519	0.00746934	1.00287	0.00413645	1.00446	0.00642419	1.00191	0.00274601	18	0.0713791	0.289595	0.538209	0.0106644	FALSE
EMMphlox-Control	383	0.991088	-0.0129146	0.988801	-0.0162475	0.99196	-0.0116461	0.989434	-0.0153243	20	0.0156309	0.10089	0.996151	0.0144429	FALSE
EMMphlox-Control	388	0.999177	-0.00118737	0.996872	-0.00452026	1.00303	0.00436303	1.00047	0.000684846	52	0.708165	0.869736	0.0606127	0.0136021	FALSE
EMMphlox-Control	389	1.00333	0.00479848	1.00102	0.00146559	1.00192	0.00277019	0.999371	-0.000907992	23	0.368346	0.587505	0.230988	0.0165959	FALSE
EMMphlox-Control	394	1.00321	0.00461775	1.00089	0.00128486	1.00352	0.00506387	1.00096	0.00138568	28	0.139542	0.388529	0.410576	0.00963563	FALSE
EMMphlox-Control	399	1.00455	0.0065554	1.00224	0.00322251	1.00594	0.00854279	1.00338	0.0048646	14	0.103067	0.325928	0.486879	0.0090245	FALSE
EMMphlox-Control	400	0.999079	-0.00132869	0.996774	-0.00466158	1.00185	0.0026673	0.9993	-0.00101089	16	0.741095	0.876963	0.0570188	0.010047	FALSE
EMMphlox-Control	401	1.00457	0.00657199	1.00225	0.0032391	1.00431	0.00620418	1.00175	0.002526	44	0.0177114	0.109348	0.961188	0.0101352	FALSE
EMMphlox-Control	402	1.00356	0.00512815	1.00125	0.00179526	1.0062	0.00891417	1.00364	0.00523599	16	0.167219	0.409398	0.387854	0.00893188	FALSE
EMMphlox-Control	405	1.00018	0.000256604	0.99787	-0.00307629	0.999856	-0.000207819	0.99731	-0.00388601	10	0.931816	0.958826	0.0182604	0.00544331	FALSE
EMMphlox-Control	410	0.998693	-0.0018862	0.996389	-0.00521909	1.00222	0.00319668	0.999666	-0.000481508	22	0.563243	0.776201	0.110026	0.00911135	FALSE
EMMphlox-Control	412	1.00514	0.00740161	1.00282	0.00406872	1.00386	0.00555538	1.0013	0.00187719	10	0.142531	0.389218	0.409807	0.0096972	FALSE
EMMphlox-Control	414	1.00512	0.00737164	1.0028	0.00403875	1.00902	0.0129574	1.00645	0.00927924	16	0.077013	0.303774	0.51745	0.0100737	FALSE
EMMphlox-Control	421	1.0062	0.00891562	1.00388	0.00558273	1.00655	0.00941406	1.00398	0.00573587	6	0.201562	0.44627	0.350403	0.0101504	FALSE
EMMphlox-Control	426	1.00186	0.00267783	0.999546	-0.000655061	0.999657	-0.000495362	0.997111	-0.00417355	14	0.648779	0.850212	0.0704728	0.0143444	FALSE
EMMphlox-Control	4302	0.993777	-0.00900624	0.991484	-0.0123391	0.993962	-0.00873791	0.991431	-0.0124161	15	0.130103	0.377033	0.423621	0.0144773	FALSE
EMMphlox-Control	4320	0.998103	-0.00273985	0.9958	-0.00607274	1.00069	0.000994934	0.998142	-0.00268325	20	0.471833	0.690724	0.160695	0.0105048	FALSE
EMMphlox-Control	4472	0.998753	-0.00179991	0.996449	-0.0051328	1.00261	0.00375884	1.00006	8.06578e-05	15	0.734539	0.876508	0.057244	0.0133066	FALSE
EMMphlox-Control	452	1.00475	0.0068331	1.00243	0.00350021	1.00598	0.00860746	1.00342	0.00492928	18	0.110338	0.340607	0.467746	0.011166	FALSE
EMMphlox-Control	46	1.00835	0.0119989	1.00602	0.00866601	1.00837	0.0120255	1.0058	0.00834731	39	0.000176932	0.0083748	2.07703	0.0111626	FALSE
EMMphlox-Control	463	1.01929	0.0275577	1.01693	0.0242248	1.00189	0.00272868	0.999342	-0.000949506	28	0.0400792	0.183588	0.736155	0.0469129	FALSE
EMMphlox-Control	475	0.997336	-0.00384862	0.995035	-0.00718151	0.997763	-0.00323164	0.995222	-0.00690983	14	0.28547	0.533378	0.272965	0.00807281	FALSE
EMMphlox-Control	5036	1.00203	0.00292489	0.999717	-0.000407999	1.00067	0.000968857	0.998124	-0.00270933	15	0.6378	0.850212	0.0704728	0.0157742	FALSE
EMMphlox-Control	5040	0.999401	-0.000865021	0.997094	-0.00419791	1.00108	0.00155659	0.998531	-0.00212159	15	0.844463	0.934754	0.0293028	0.0108291	FALSE
EMMphlox-Control	5041	1.00092	0.00133189	0.998614	-0.002001	1.00229	0.00329399	0.999734	-0.000384191	20	0.725976	0.873632	0.0586715	0.0105421	FALSE
EMMphlox-Control	507	1.00808	0.0116031	1.00575	0.00827024	1.00678	0.00975214	1.00422	0.00607396	18	0.00801288	0.0940691	1.02655	0.0108422	FALSE
EMMphlox-Control	51	1.00116	0.00166587	0.998845	-0.00166702	1.0013	0.0018812	0.998755	-0.00179698	10	0.781665	0.905109	0.043299	0.0123342	FALSE
EMMphlox-Control	515	1.00309	0.00445823	1.00078	0.00112534	1.00196	0.00282739	0.99941	-0.000850798	34	0.252638	0.491433	0.308536	0.0141526	FALSE
EMMphlox-Control	524	1.00343	0.0049374	1.00111	0.00160451	1.00129	0.0018584	0.998739	-0.00181979	8	0.270778	0.512674	0.290159	0.00766151	FALSE
EMMphlox-Control	5296	1.00189	0.00272052	0.999576	-0.000612372	1.00494	0.00711383	1.00238	0.00343564	10	0.711008	0.869736	0.0606127	0.0152242	FALSE
EMMphlox-Control	534	1.00245	0.00353236	1.00014	0.000199474	1.00037	0.000527854	0.997819	-0.00315033	31	0.452183	0.675895	0.170121	0.0168427	FALSE
EMMphlox-Control	538	1.00323	0.00465128	1.00091	0.00131839	1.00248	0.00357003	0.999925	-0.000108159	44	0.192265	0.443437	0.353168	0.0144755	FALSE
EMMphlox-Control	539	1.00642	0.00922629	1.00409	0.0058934	1.00696	0.0100082	1.0044	0.00633005	38	0.0206081	0.117054	0.931614	0.0150658	FALSE
EMMphlox-Control	549	1.01014	0.0145563	1.00781	0.0112234	1.00887	0.0127382	1.0063	0.00905997	15	0.00432128	0.0939335	1.02718	0.0112502	FALSE
EMMphlox-Control	59	1.00164	0.00236765	0.999331	-0.000965242	1.0014	0.0020183	0.99885	-0.00165989	20	0.649491	0.850212	0.0704728	0.0151315	FALSE
EMMphlox-Control	5916	0.997144	-0.00412691	0.994843	-0.0074598	0.998542	-0.0021046	0.996	-0.00578279	10	0.521411	0.729152	0.137182	0.0131212	FALSE
EMMphlox-Control	601	1.00428	0.00616259	1.00196	0.0028297	1.00376	0.00540925	1.0012	0.00173106	28	0.102329	0.325928	0.486879	0.012191	FALSE
EMMphlox-Control	603	0.996943	-0.00441692	0.994643	-0.00774981	1.00076	0.00109608	0.998212	-0.0025821	20	0.354444	0.587505	0.230988	0.0135781	FALSE
EMMphlox-Control	628	0.994945	-0.00731152	0.992649	-0.0106444	0.995702	-0.00621468	0.993166	-0.00989287	14	0.154466	0.402507	0.395227	0.0119418	FALSE
EMMphlox-Control	6379	0.99979	-0.000302761	0.997483	-0.00363565	1.00149	0.00214778	0.99894	-0.00153041	15	0.923588	0.957319	0.0189433	0.00719495	FALSE
EMMphlox-Control	650	0.996869	-0.00452366	0.994569	-0.00785655	1.00134	0.00193412	0.998792	-0.00174407	20	0.372363	0.587505	0.230988	0.0145457	FALSE
EMMphlox-Control	6596	0.999135	-0.00124807	0.99683	-0.00458096	1.00061	0.000885746	0.998066	-0.00279244	10	0.809499	0.905109	0.043299	0.0104842	FALSE
EMMphlox-Control	7	0.990924	-0.0131536	0.988638	-0.0164865	0.992878	-0.0103118	0.99035	-0.01399	10	0.0450344	0.19984	0.699317	0.0121046	FALSE
EMMphlox-Control	720	1.00601	0.00865073	1.00369	0.00531784	1.00561	0.00807023	1.00305	0.00439204	9	0.290372	0.535492	0.271247	0.0156477	FALSE
EMMphlox-Control	737	0.999314	-0.000989956	0.997008	-0.00432285	1.00233	0.0033642	0.999782	-0.000313982	32	0.774328	0.905109	0.043299	0.0118883	FALSE
EMMphlox-Control	738	1.00783	0.0112508	1.0055	0.00791791	1.00769	0.0110458	1.00512	0.00736766	18	0.0066967	0.0940691	1.02655	0.0101721	FALSE
EMMphlox-Control	745	1.00251	0.00362118	1.0002	0.000288292	0.999675	-0.000468747	0.99713	-0.00414693	20	0.412569	0.623242	0.205343	0.0125208	FALSE
EMMphlox-Control	7506	0.995382	-0.00667818	0.993085	-0.0100111	0.997633	-0.00341933	0.995092	-0.00709752	10	0.371374	0.587505	0.230988	0.0151703	FALSE
EMMphlox-Control	7507	1.00093	0.00133693	0.998617	-0.00199596	1.00138	0.00199503	0.998834	-0.00168315	20	0.716613	0.869736	0.0606127	0.0101472	FALSE
EMMphlox-Control	767	1.00264	0.00380722	1.00033	0.000474332	1.00104	0.00150291	0.998493	-0.00217528	20	0.346976	0.586555	0.231691	0.0112833	FALSE
EMMphlox-Control	7767	0.996341	-0.00528857	0.994042	-0.00862146	0.997603	-0.00346163	0.995063	-0.00713981	25	0.36723	0.587505	0.230988	0.0191373	FALSE
EMMphlox-Control	778	1.00466	0.00670553	1.00234	0.00337264	1.00491	0.00707213	1.00236	0.00339394	40	0.0667753	0.280077	0.552722	0.0141066	FALSE
EMMphlox-Control	780	1.00752	0.0108047	1.00519	0.00747182	1.00148	0.00213548	0.998931	-0.00154271	52	0.103287	0.325928	0.486879	0.0316861	FALSE
EMMphlox-Control	781	0.994796	-0.00752703	0.992501	-0.0108599	0.996979	-0.00436485	0.994441	-0.00804304	44	0.0268469	0.141195	0.850182	0.0133529	FALSE
EMMphlox-Control	784	0.995259	-0.00685602	0.992962	-0.0101889	1.00058	0.000836509	0.998032	-0.00284168	24	0.345022	0.586555	0.231691	0.0234693	FALSE
EMMphlox-Control	79	1.00063	0.00091076	0.998323	-0.00242213	0.999314	-0.000989724	0.99677	-0.00466791	16	0.849178	0.934754	0.0293028	0.0123051	FALSE
EMMphlox-Control	808	1.00156	0.00224764	0.999248	-0.00108525	1.00183	0.00263292	0.999276	-0.00104526	27	0.523757	0.729152	0.137182	0.0111835	FALSE
EMMphlox-Control	819	1.0089	0.0127869	1.00657	0.00945403	1.01058	0.0151831	1.00801	0.0115049	14	0.0121845	0.0940691	1.02655	0.0110897	FALSE
EMMphlox-Control	86	1.00378	0.00543867	1.00146	0.00210578	1.00598	0.00859806	1.00342	0.00491987	22	0.0876681	0.319202	0.495935	0.00864903	FALSE
EMMphlox-Control	87	1.01004	0.0144143	1.00771	0.0110814	1.01317	0.0188796	1.01059	0.0152014	16	0.0150722	0.10089	0.996151	0.0142464	FALSE
EMMphlox-Control	90	1.00457	0.00657801	1.00225	0.00324512	1.00408	0.00587479	1.00152	0.0021966	40	0.0125867	0.0940691	1.02655	0.00891061	FALSE
EMMphlox-Control	900	1.00073	0.00105198	0.99842	-0.00228091	0.99971	-0.000417792	0.997165	-0.00409598	42	0.793756	0.905109	0.043299	0.0164696	FALSE
EMMphlox-Control	917	1.00574	0.00825168	1.00342	0.00491879	1.00394	0.00567698	1.00139	0.00199879	10	0.332855	0.576407	0.239271	0.0174132	FALSE
EMMphlox-Control	93	0.999534	-0.000673065	0.997227	-0.00400596	1.00236	0.00340407	0.99981	-0.000274116	12	0.882045	0.957319	0.0189433	0.00996537	FALSE
EMMphlox-Control	934	1.00614	0.00883251	1.00382	0.00549962	1.0033	0.00474736	1.00074	0.00106917	45	0.0088371	0.0940691	1.02655	0.0133551	FALSE
EMMphlox-Control	942	0.993983	-0.00870705	0.991689	-0.0120399	0.997195	-0.00405238	0.994656	-0.00773057	12	0.0338368	0.165684	0.78072	0.00812242	FALSE
EMMphlox-Control	965	1.0049	0.00705345	1.00258	0.00372056	1.00279	0.00402162	1.00024	0.000343435	26	0.129774	0.377033	0.423621	0.0150182	FALSE
EMMphlox-Control	972_control	1	0	0.997692	-0.00333289	1	0	0.997454	-0.00367819	97	1	1	0	0.0108713	FALSE
EMMphlox-Control	974	1.00609	0.00875849	1.00377	0.0054256	1.00525	0.00755752	1.00269	0.00387933	44	0.0114228	0.0940691	1.02655	0.0136656	FALSE
EMMphlox-Control	989	1.00559	0.00804904	1.00327	0.00471615	1.00757	0.0108735	1.005	0.00719529	26	0.155901	0.402507	0.395227	0.0187204	FALSE
EMMphlox-Control	993	0.994593	-0.00782155	0.992298	-0.0111544	0.99899	-0.00145779	0.996446	-0.00513598	15	0.174777	0.420649	0.37608	0.0141058	FALSE
EMMphlox-Control	996	1.00468	0.00673493	1.00236	0.00340204	1.005	0.00718929	1.00244	0.0035111	4	0.246923	0.490574	0.309295	0.00644461	FALSE

## Sheet: growth_stresses
RNA-gene	condition_short	mean_effect_size	mean_effect_size_log2	mean_fitness	mean_fitness_log2	median_effect_size	median_effect_size_log2	median_fitness	median_fitness_log2	observation_count	p_Welch	p_Welch_BH	p_Welch_BH_-log10	stdev_fitness	is_hit
1	EMM-3AT4	1.11936	0.162668	0.965771	-0.0502468	1.05319	0.0747638	0.978015	-0.0320708	11	0.00401332	0.172485	0.763249	0.0701285	FALSE
1	EMM-3AT6	1.14491	0.195229	0.987816	-0.0176855	1.06665	0.093088	0.990517	-0.0137467	11	9.50732e-05	0.00270959	2.5671	0.0449105	TRUE
1	EMM-Bleo200	0.976233	-0.034703	0.842286	-0.247618	0.950978	-0.0725157	0.883101	-0.17935	12	0.611874	0.74206	0.129561	0.103913	FALSE
1	EMM-Canav60	1.02244	0.0320174	0.882154	-0.180897	1.01827	0.0261134	0.945585	-0.0807213	12	0.655757	0.924985	0.0338653	0.117157	FALSE
1	EMM-Cys	1.07426	0.103342	0.926863	-0.109572	1.04275	0.0603879	0.968318	-0.0464468	24	0.0919585	0.500522	0.300577	0.129679	FALSE
1	EMM-Met	1.10142	0.139361	0.950294	-0.0735539	1.04737	0.0667654	0.972608	-0.0400692	24	0.0139422	0.553535	0.256855	0.109635	FALSE
1	EMMphlox-Act0.1	0.962664	-0.0548964	0.855962	-0.224381	0.959572	-0.059537	0.942173	-0.0859362	16	0.577898	0.882988	0.0540452	0.203797	FALSE
1	EMMphlox-Act1	0.929927	-0.10481	0.826854	-0.274295	0.953059	-0.0693619	0.935778	-0.0957611	16	0.329246	0.769094	0.114021	0.220594	FALSE
1	EMMphlox-Act2	0.954445	-0.0672666	0.848654	-0.236751	0.969538	-0.0446303	0.951958	-0.0710295	16	0.514339	0.86175	0.064619	0.214453	FALSE
1	EMMphlox-Cana75	1.01582	0.0226509	0.90323	-0.146834	0.988372	-0.0168745	0.97045	-0.0432737	24	0.738839	0.877689	0.0566593	0.146197	FALSE
1	EMMphlox-EtOH0.1	0.919339	-0.121331	0.817439	-0.290816	0.974763	-0.0368768	0.957088	-0.063276	16	0.36047	0.855105	0.0679805	0.282977	FALSE
1	YES-Bleo200	0.91529	-0.127699	0.850543	-0.233544	0.915153	-0.127915	0.912144	-0.132667	12	0.0881151	0.569948	0.244165	0.14209	FALSE
1	YES-Bleo300	0.947874	-0.0772332	0.880822	-0.183078	0.906258	-0.142006	0.903278	-0.146758	4	0.299711	0.927189	0.0328319	0.076522	FALSE
1	YES-Bleo600	0.943485	-0.0839281	0.876744	-0.189773	0.909382	-0.137042	0.906392	-0.141794	8	0.264045	0.630015	0.200649	0.119294	FALSE
1	YES-Bortezomib100	1.04057	0.057371	0.966959	-0.0484739	1.00753	0.0108266	1.00422	0.00607459	12	0.309675	0.692216	0.159759	0.11699	FALSE
1	YES-Bortezomib200	1.02433	0.0346876	0.951874	-0.0711574	1.01557	0.0222896	1.01223	0.0175376	12	0.573472	0.723792	0.140386	0.12952	FALSE
1	YES-Bref60	1.34544	0.42808	1.25027	0.322235	0.999786	-0.000309328	0.996498	-0.00506129	11	0.102018	0.270466	0.567888	0.590643	FALSE
1	YES-Calco10KCl0.5	0.99188	-0.0117623	0.921715	-0.117607	0.921304	-0.118251	0.918274	-0.123003	12	0.603471	0.838976	0.0762505	0.0294608	FALSE
1	YES-Calco2	0.995258	-0.00685714	0.924854	-0.112702	0.983228	-0.0244028	0.979994	-0.0291547	11	0.923721	0.944329	0.0248765	0.144191	FALSE
1	YES-Calco4KCl0.5	0.965943	-0.0499897	0.897613	-0.155835	0.976104	-0.0348933	0.972894	-0.0396453	12	0.472424	0.757084	0.120856	0.142433	FALSE
1	YES-Cana120	0.996438	-0.00514735	0.925951	-0.110992	1.00111	0.00159428	0.997814	-0.00315769	12	0.942465	0.967937	0.0141529	0.150365	FALSE
1	YES-Cana60	1.00735	0.0105627	0.936089	-0.0952822	0.99117	-0.0127961	0.98791	-0.0175481	12	0.864588	0.932628	0.0302917	0.129862	FALSE
1	YES-CoCl0.25	1.03016	0.0428637	0.957284	-0.0629812	0.98421	-0.0229626	0.980973	-0.0277145	12	0.321757	0.795252	0.0994955	0.0859321	FALSE
1	YES-CoCl5	1.09431	0.13002	1.0169	0.0241748	1.02443	0.0348214	1.02106	0.0300694	12	1.04625e-09	5.96365e-08	7.22449	0.0214518	FALSE
1	YES-Cycloh100	1.02779	0.03955	0.955088	-0.0662949	1.02126	0.0303482	1.0179	0.0255963	12	0.548874	0.920171	0.0361312	0.13958	FALSE
1	YES-Cycloh200	1.03667	0.0519553	0.963336	-0.0538896	1.03494	0.0495497	1.03154	0.0447978	12	0.405708	0.831855	0.0799526	0.13131	FALSE
1	YES-Cycloh400	1.00965	0.0138621	0.938232	-0.0919828	0.986684	-0.0193394	0.98344	-0.0240913	12	0.806889	0.910746	0.0406028	0.117944	FALSE
1	YES-Cycloh600	1.01239	0.0177609	0.940771	-0.088084	1.00196	0.00283038	0.998669	-0.00192159	12	0.751263	0.962292	0.016693	0.11646	FALSE
1	YES-Dhcumarin100	1.02643	0.0376341	0.95382	-0.0682108	1.0176	0.0251664	1.01425	0.0204144	12	0.533919	0.827083	0.0824507	0.126921	FALSE
1	YES-Dhcumarin200	1.04345	0.0613659	0.96964	-0.044479	1.02603	0.0370727	1.02266	0.0323207	11	0.318563	0.66023	0.180304	0.12275	FALSE
1	YES-Dhcumarin50	1.02737	0.0389574	0.954695	-0.0668875	1.03235	0.0459353	1.02896	0.0411833	12	0.578964	0.802148	0.0957457	0.149308	FALSE
1	YES-EDTA0.1	1.0415	0.0586568	0.967821	-0.0471881	1.01511	0.0216362	1.01177	0.0168842	12	0.212678	0.710736	0.148292	0.0944063	FALSE
1	YES-EDTA0.3	1.05324	0.0748354	0.978735	-0.0310095	1.00102	0.00146375	0.997723	-0.00328822	12	0.0858268	0.400018	0.397921	0.0846188	FALSE
1	YES-EDTA0.6	1.00803	0.0115375	0.936722	-0.0943074	0.979747	-0.0295181	0.976526	-0.0342701	12	0.818366	0.931377	0.0308745	0.102847	FALSE
1	YES-EtOH5	1.03397	0.0481919	0.960826	-0.057653	1.02563	0.0365106	1.02226	0.0317586	12	0.48176	0.904825	0.0434353	0.14536	FALSE
1	YES-Forma2	0.872864	-0.19617	0.811118	-0.302015	0.864907	-0.209384	0.862063	-0.214136	12	0.00783746	0.0893471	1.04892	0.12471	FALSE
1	YES-Forma3	0.88715	-0.17275	0.824394	-0.278595	0.861729	-0.214695	0.858895	-0.219447	12	0.00167681	0.0637186	1.19573	0.0876306	FALSE
1	YES-HU30	1.03312	0.0470123	0.960041	-0.0588326	0.966238	-0.0495496	0.963061	-0.0543015	12	0.0798051	0.310094	0.508507	0.0431381	FALSE
1	YES-HU45	1.03543	0.050226	0.962182	-0.055619	0.977857	-0.0323043	0.974642	-0.0370563	12	0.263322	0.698109	0.156077	0.0896078	FALSE
1	YES-KCl0.5SDS0.01	0.968675	-0.0459159	0.900151	-0.151761	0.953728	-0.0683505	0.950592	-0.0731025	12	0.493396	0.721118	0.141994	0.137221	FALSE
1	YES-KCl1SDS0.01	1.00686	0.00986865	0.935639	-0.0959763	0.945731	-0.0804976	0.942621	-0.0852495	12	0.840069	0.967352	0.0144156	0.0996675	FALSE
1	YES-Ovana3	0.96173	-0.0562964	0.893698	-0.162141	0.935498	-0.096193	0.932422	-0.100945	11	0.520723	0.725057	0.139628	0.173516	FALSE
1	YES-Ovana6	1.08372	0.115993	1.00706	0.0101481	1.02523	0.0359504	1.02186	0.0311984	11	0.0206931	0.289704	0.538046	0.0909913	FALSE
1	YES-SDS0.01	1.02675	0.0380793	0.954115	-0.0677656	0.983168	-0.0244901	0.979935	-0.0292421	15	0.407066	0.637384	0.195599	0.1042	FALSE
1	YES-SDS0.02	1.01991	0.0284412	0.947762	-0.0774037	0.951789	-0.0712865	0.948659	-0.0760385	9	0.252873	0.45758	0.339533	0.0323749	FALSE
1	YES-TBH15	0.703432	-0.507516	0.653672	-0.613361	0.639391	-0.64523	0.637288	-0.649982	5	0.178639	0.771106	0.112886	0.378126	FALSE
1	YES-UV1000	1.05096	0.0717068	0.976615	-0.0341381	0.994978	-0.00726329	0.991706	-0.0120153	12	0.116622	0.839481	0.0759889	0.0901445	FALSE
1	YES-UV10m	0.989861	-0.0147015	0.919839	-0.120546	1.04297	0.0606929	1.03954	0.0559409	12	0.889121	0.969394	0.0134995	0.225448	FALSE
1	YES-UV2000	0.981607	-0.0267821	0.912169	-0.132627	0.981882	-0.026379	0.978653	-0.031131	12	0.717326	0.869948	0.0605066	0.154665	FALSE
1	YES-UV20m	0.978512	-0.0313382	0.909293	-0.137183	1.02492	0.0355097	1.02155	0.0307578	12	0.755164	0.953685	0.0205949	0.212889	FALSE
1	YES-UV3000	0.980367	-0.0286062	0.911016	-0.134451	0.995731	-0.00617194	0.992457	-0.0109239	12	0.701623	0.990365	0.00420469	0.156034	FALSE
1	YES-UV4000	1.0152	0.0217648	0.943386	-0.0840801	1.00075	0.00108582	0.997462	-0.00366614	11	0.76162	0.935468	0.0289709	0.145715	FALSE
1	YES-UV5m	1.00623	0.00895459	0.935046	-0.0968903	1.03151	0.0447613	1.02812	0.0400094	11	0.918375	0.957312	0.0189464	0.178823	FALSE
1	YES-UV6000	0.980827	-0.0279298	0.911444	-0.133775	0.999837	-0.000235268	0.996549	-0.00498723	12	0.717793	0.854375	0.0683514	0.161925	FALSE
1	YES-UV9000	0.9934	-0.00955305	0.923128	-0.115398	1.01949	0.0278525	1.01614	0.0231005	12	0.914389	0.947639	0.0233571	0.18922	FALSE
1	YES-VPA5	1.1288	0.174787	1.04895	0.0689417	1.05654	0.0793522	1.05307	0.0746002	12	7.03686e-11	8.02202e-09	8.09572	0.0330733	TRUE
1	YESphlox-Act0.1	0.957388	-0.0628245	0.89899	-0.153623	0.942172	-0.0859381	0.957632	-0.0624574	16	0.325695	0.861122	0.0649351	0.151921	FALSE
1	YESphlox-Act1	0.971459	-0.0417755	0.912203	-0.132574	0.960273	-0.0584832	0.97603	-0.0350024	16	0.625331	0.924906	0.0339026	0.210742	FALSE
1	YESphlox-Act2	0.959952	-0.0589664	0.901397	-0.149765	0.955861	-0.0651272	0.971546	-0.0416464	16	0.419959	0.794475	0.0999196	0.176443	FALSE
1	YESphlox-stationary7	0.995435	-0.00660147	0.934716	-0.0973999	0.996007	-0.00577167	1.01235	0.0177091	24	0.901731	0.943736	0.0251496	0.159501	FALSE
1	YESphlox-Benza12	1.02002	0.0285922	0.957798	-0.0622062	1.0155	0.0221927	1.03216	0.0456734	12	0.662926	0.961871	0.0168832	0.140705	FALSE
1	YESphlox-Benza4	1.00718	0.0103155	0.945741	-0.0804829	0.990428	-0.0138755	1.00668	0.00960528	12	0.874168	0.914268	0.0389266	0.139204	FALSE
1	YESphlox-Benza8	1.01184	0.0169803	0.95012	-0.0738181	1.00498	0.00716395	1.02147	0.0306447	12	0.803067	0.918102	0.0371093	0.146189	FALSE
1	YESphlox-Bort500	0.893319	-0.162753	0.838829	-0.253551	0.927611	-0.108408	0.942832	-0.0849277	12	0.130212	0.362053	0.441228	0.209756	FALSE
1	YESphlox-CdCl1	2.1404	1.09788	2.00984	1.00708	1.15006	0.201711	1.16893	0.225191	9	0.078421	0.722127	0.141386	1.59257	FALSE
1	YESphlox-Diamide2	0.909076	-0.137528	0.853625	-0.228326	0.919332	-0.121342	0.934417	-0.097861	12	0.135082	0.658613	0.18137	0.18054	FALSE
1	YESphlox-Diamide3	0.918393	-0.122816	0.862374	-0.213614	0.914523	-0.128908	0.929529	-0.105428	12	0.12824	0.417697	0.379138	0.158168	FALSE
1	YESphlox-Diamide3.5	0.998884	-0.00161094	0.937955	-0.0924094	0.955285	-0.0659968	0.97096	-0.0425161	12	0.981888	0.981888	0.00793821	0.151898	FALSE
1	YESphlox-EDTA4	1.1264	0.171717	1.05769	0.0809188	1.04167	0.0588958	1.05876	0.0823766	12	0.000308546	0.0351742	1.45378	0.0817107	FALSE
1	YESphlox-EGTA1	1.00725	0.0104169	0.945807	-0.0803815	1.00503	0.00724393	1.02153	0.0307247	12	0.888016	0.98026	0.00865871	0.15936	FALSE
1	YESphlox-EGTA10	1.54662	0.629123	1.45228	0.538324	1.42865	0.514656	1.4521	0.538137	12	0.00589128	0.0889654	1.05078	0.522274	FALSE
1	YESphlox-EGTA15	1.155	0.207888	1.08454	0.117089	1.08941	0.123551	1.10729	0.147032	3	0.433145	0.969582	0.0134153	0.258988	FALSE
1	YESphlox-EGTA5	1.00342	0.00493131	0.942218	-0.0858671	1.01257	0.0180199	1.02918	0.0415007	12	0.948015	0.978664	0.00936618	0.162851	FALSE
1	YESphlox-EtOH0.1	0.975839	-0.0352844	0.916316	-0.126083	0.940182	-0.0889886	0.955609	-0.0655079	14	0.622371	0.985275	0.00644254	0.163516	FALSE
1	YESphlox-EtOH10	0.954885	-0.0666004	0.89664	-0.157399	0.912952	-0.131388	0.927933	-0.107908	12	0.404288	0.933315	0.0299716	0.16543	FALSE
1	YESphlox-Forma2.5	0.849882	-0.234666	0.798042	-0.325464	0.843279	-0.245918	0.857116	-0.222437	12	0.00675151	0.105774	0.975622	0.145895	FALSE
1	YESphlox-Gluc0.1stationary7	1.08474	0.117343	1.01857	0.0265448	0.98512	-0.0216284	1.00128	0.00185235	24	3.33105e-06	8.19714e-05	4.08634	0.0557264	FALSE
1	YESphlox-Gluc0.5stationary7	1.0806	0.111834	1.01469	0.0210359	0.99283	-0.0103821	1.00912	0.0130987	48	2.24916e-09	5.45263e-08	7.26339	0.0348081	FALSE
1	YESphlox-Gluc1stationary7	1.05143	0.0723532	0.987296	-0.0184452	1.00027	0.000394546	1.01669	0.0238753	23	0.0221528	0.209714	0.678374	0.0817392	FALSE
1	YESphlox-Glycerol2	1.00412	0.00593758	0.942875	-0.0848608	1.00116	0.00167904	1.01759	0.0251598	12	0.9278	0.981461	0.00812715	0.139919	FALSE
1	YESphlox-Glycerol2MMS0.0075	1.00926	0.0132954	0.947696	-0.0775031	0.982374	-0.0256563	0.998493	-0.0021755	12	0.825443	0.922553	0.0350085	0.128147	FALSE
1	YESphlox-Glycerol3	1.01267	0.0181676	0.950902	-0.0726308	1.00498	0.00715985	1.02147	0.0306406	12	0.802349	0.960949	0.0172996	0.15649	FALSE
1	YESphlox-Glycerol3MMS0.005	1.05502	0.0772733	0.990669	-0.0135251	1.02463	0.0350983	1.04144	0.0585791	12	0.222597	0.445195	0.35145	0.134223	FALSE
1	YESphlox-HP10	0.865947	-0.20765	0.813126	-0.298448	0.871257	-0.198829	0.885554	-0.175348	20	0.0627683	0.454427	0.342536	0.281461	FALSE
1	YESphlox-HP15	0.883298	-0.179027	0.82942	-0.269825	0.875724	-0.191452	0.890094	-0.167971	11	0.106242	0.594625	0.225757	0.202665	FALSE
1	YESphlox-HP2	0.97694	-0.0336587	0.917349	-0.124457	0.993294	-0.00970757	1.00959	0.0137732	24	0.604759	0.912101	0.0399569	0.19504	FALSE
1	YESphlox-HP4	0.997618	-0.00344108	0.936766	-0.0942395	0.977685	-0.0325591	0.993727	-0.00907828	36	0.931236	0.965597	0.0152042	0.139616	FALSE
1	YESphlox-HP6	0.973707	-0.0384397	0.914314	-0.129238	0.960565	-0.0580451	0.976327	-0.0345644	36	0.425538	0.656396	0.182834	0.171696	FALSE
1	YESphlox-HP8	0.968996	-0.0454371	0.90989	-0.136235	0.974873	-0.0367139	0.990869	-0.0132331	27	0.454593	0.789441	0.102681	0.191176	FALSE
1	YESphlox-HU8	0.967391	-0.0478295	0.908383	-0.138628	0.897205	-0.15649	0.911927	-0.133009	12	0.0186779	0.171507	0.765718	0.022138	FALSE
1	YESphlox-HU8MMS0.075	1.09254	0.127692	1.0259	0.0368933	1.0011	0.00158422	1.01753	0.025065	12	9.64214e-07	0.00010992	3.95892	0.0367059	FALSE
1	YESphlox-KCl0.5	0.967165	-0.0481664	0.908171	-0.138965	0.937414	-0.0932419	0.952796	-0.0697611	12	0.43089	0.755714	0.121642	0.12564	FALSE
1	YESphlox-KCl0.5SDS0.004	0.99948	-0.000750864	0.938514	-0.0915493	0.957503	-0.0626517	0.973214	-0.0391709	12	0.987636	0.995527	0.00194707	0.100169	FALSE
1	YESphlox-KCl1	1.0375	0.0531174	0.97422	-0.037681	0.971855	-0.0411873	0.987802	-0.0177065	12	0.0525937	0.285509	0.54438	0.0465776	FALSE
1	YESphlox-LiCl4	1.03424	0.048577	0.971158	-0.0422215	1.01751	0.025043	1.03421	0.0485238	12	0.462078	0.908221	0.0418083	0.141715	FALSE
1	YESphlox-LiCl6	1.18722	0.24759	1.1148	0.156791	1.14522	0.195624	1.16401	0.219105	12	0.000927932	0.0487429	1.31209	0.137011	TRUE
1	YESphlox-MMS0.005	1.03432	0.0486789	0.971227	-0.0421195	1.0297	0.0422175	1.04659	0.0656983	12	0.543525	0.764962	0.11636	0.17436	FALSE
1	YESphlox-MMS0.075	0.983618	-0.02383	0.92362	-0.114628	0.973852	-0.038225	0.989832	-0.0147442	24	0.629407	0.717524	0.144164	0.144601	FALSE
1	YESphlox-NaCl150	1.02053	0.0293124	0.958277	-0.061486	1.01087	0.0155943	1.02745	0.039075	12	0.672521	0.877703	0.0566524	0.149355	FALSE
1	YESphlox-NaCl150MMS0.005	1.02203	0.0314322	0.959686	-0.0593662	0.991305	-0.0125992	1.00757	0.0108816	12	0.604057	0.897037	0.0471895	0.129177	FALSE
1	YESphlox-Ovana0.5	1.07587	0.1055	1.01024	0.0147014	1.02538	0.0361625	1.04221	0.0596432	12	0.0317804	0.27869	0.554879	0.0966499	FALSE
1	YESphlox-Ovana1	1.09074	0.125301	1.0242	0.0345028	1.02489	0.0354727	1.04171	0.0589535	12	0.00955624	0.108941	0.962808	0.0918181	FALSE
1	YESphlox-Ovana4	1.04042	0.0571722	0.976962	-0.0336262	0.968242	-0.0465603	0.98413	-0.0230795	9	0.299971	0.851387	0.0698728	0.0986278	FALSE
1	YESphlox-Phloxine2	0.991171	-0.0127943	0.930712	-0.103593	1.00832	0.0119573	1.02487	0.0354381	12	0.876864	0.969502	0.0134513	0.177307	FALSE
1	YESphlox-Phloxine2HP10	0.894705	-0.160516	0.84013	-0.251315	0.875355	-0.192059	0.889719	-0.168578	12	0.104861	0.331646	0.479325	0.191268	FALSE
1	YESphlox-Phloxine2HP15	0.932522	-0.10079	0.875641	-0.191588	0.923517	-0.114789	0.938671	-0.0913083	11	0.474073	0.755011	0.122047	0.280453	FALSE
1	YESphlox-SDS0.004	1.04118	0.0582168	0.977669	-0.0325817	1.00287	0.00413006	1.01932	0.0276108	12	0.231396	0.673887	0.171413	0.100038	FALSE
1	YESphlox-TBH1	1.02251	0.0321145	0.96014	-0.0586839	1.01005	0.0144283	1.02662	0.0379091	12	0.609811	0.77042	0.113272	0.134554	FALSE
1	YESphlox-TBH1.5	1.15662	0.209917	1.08607	0.119119	1.14921	0.200644	1.16807	0.224124	5	0.213273	0.574277	0.240879	0.222002	FALSE
1	YESphlox-TSA1000	1.01691	0.0241962	0.954884	-0.0666022	1.00882	0.0126745	1.02538	0.0361552	12	0.735775	0.873997	0.0584901	0.154657	FALSE
1	YESphlox-TSA500	0.989724	-0.0149013	0.929354	-0.1057	0.979085	-0.030494	0.995151	-0.00701326	12	0.814849	0.926563	0.0331252	0.134406	FALSE
1	YESphlox-TeaTree1	0.929901	-0.104851	0.87318	-0.195649	0.936976	-0.0939159	0.952351	-0.0704351	11	0.250147	0.60674	0.216997	0.175888	FALSE
1	YESphlox-TeaTree10	0.97722	-0.0332449	0.917612	-0.124043	0.987647	-0.0179333	1.00385	0.00554751	12	0.64898	0.87182	0.0595734	0.154102	FALSE
1	YESphlox-TeaTree100	0.997912	-0.00301501	0.937043	-0.0938134	0.996674	-0.00480631	1.01303	0.0186745	12	0.967883	0.996885	0.00135484	0.160691	FALSE
1	YESphlox-Temp25	0.955577	-0.065556	0.89729	-0.156354	0.970163	-0.0437006	0.986082	-0.0202198	12	0.483726	0.87442	0.0582801	0.196116	FALSE
1	YESphlox-Temp25Gluc0.1	1.06743	0.0941439	1.00232	0.00334553	0.975234	-0.0361793	0.991237	-0.0126986	24	0.000144814	0.00233771	2.63121	0.055403	FALSE
1	YESphlox-Temp25Gluc0.5	1.03766	0.0533339	0.974366	-0.0374645	0.964069	-0.0527914	0.979888	-0.0293106	24	0.0438974	0.160013	0.795845	0.0642255	FALSE
1	YESphlox-Temp25Gluc1	0.99015	-0.0142808	0.929754	-0.105079	0.985909	-0.0204737	1.00209	0.00300703	24	0.7671	0.851001	0.0700699	0.141451	FALSE
1	YESphlox-Temp25Gluc3	0.97213	-0.0407787	0.912833	-0.131577	0.979044	-0.0305543	0.995109	-0.00707351	12	0.624989	0.96905	0.0136538	0.176572	FALSE
1	YESphlox-Tuni20	1.11448	0.15637	1.0465	0.0655719	1.05292	0.0743961	1.0702	0.0978769	5	0.00464594	0.149832	0.824397	0.0499699	FALSE
1	YESphlox-Tuni40	1.05067	0.0713129	0.986584	-0.0194855	1.04757	0.0670425	1.06476	0.0905233	7	0.358087	0.763737	0.117056	0.12413	FALSE
1	YESphlox-Tuni60	1.20479	0.268786	1.1313	0.177988	1.07091	0.0988342	1.08848	0.122315	6	0.0772644	0.71321	0.146783	0.212279	FALSE
1	YESphlox-Tuni80	1.04101	0.0579861	0.977513	-0.0328123	0.939022	-0.0907692	0.95443	-0.0672885	11	0.245615	0.861345	0.0648229	0.0983262	FALSE
1	YESphlox-VPA10	1.10186	0.139939	1.03465	0.0491403	1.02007	0.0286716	1.03681	0.0521523	9	0.000251494	0.0113654	1.94441	0.051488	FALSE
1	YESphlox-VPA8	1.14695	0.197808	1.07699	0.10701	1.0449	0.0633595	1.06204	0.0868403	11	2.73106e-06	9.14906e-05	4.03862	0.0592823	FALSE
1	YESphlox-Xylose2	1.08341	0.115581	1.01733	0.0247828	1.00406	0.00585121	1.02054	0.029332	11	0.000164596	0.00469098	2.32874	0.0462434	FALSE
1	Yesphlox-Caffeine10	0.867297	-0.205402	0.814394	-0.296201	0.793301	-0.33406	0.806318	-0.310579	13	0.142131	0.731691	0.135672	0.283912	FALSE
1	Yesphlox-DMSO	0.940224	-0.0889233	0.882873	-0.179722	0.976058	-0.0349605	0.992074	-0.0114797	16	0.388595	0.908621	0.0416172	0.249363	FALSE
1	Yesphlox-Gal2	0.938205	-0.0920246	0.880977	-0.182823	0.954365	-0.0673872	0.970025	-0.0439064	16	0.28393	0.637663	0.195409	0.204742	FALSE
1	Yesphlox-Rapa1	0.937807	-0.0926366	0.880604	-0.183435	0.931653	-0.102136	0.94694	-0.0786548	15	0.26751	0.829294	0.0812912	0.191829	FALSE
1	Yesphlox-Rapa100	0.950729	-0.0728946	0.892737	-0.163693	0.951248	-0.0721067	0.966857	-0.0486259	16	0.307617	0.687732	0.162581	0.170251	FALSE
1	Yesphlox-Sorb1.2	0.918959	-0.121927	0.862905	-0.212726	0.967603	-0.0475135	0.98348	-0.0240327	15	0.306474	0.855829	0.0676129	0.274806	FALSE
1	Yesphlox-Torin5	0.947721	-0.077466	0.889913	-0.168264	0.956438	-0.064256	0.972132	-0.0407752	16	0.442472	0.747988	0.126105	0.245318	FALSE
103	EMM-3AT4	1.0053	0.00762913	1.0188	0.0268663	0.990767	-0.0133818	1.00484	0.00696244	9	0.748811	0.936567	0.0284612	0.0448724	FALSE
103	EMM-3AT6	0.993953	-0.00875103	1.00729	0.0104861	0.995211	-0.00692636	1.00934	0.0134179	8	0.592688	0.903752	0.0439507	0.0255259	FALSE
103	EMM-Bleo200	0.99821	-0.00258467	1.01161	0.0166525	0.994164	-0.0084436	1.00828	0.0119007	9	0.814425	0.892735	0.0492777	0.0113998	FALSE
103	EMM-Canav60	0.991139	-0.0128402	1.00444	0.00639696	0.996558	-0.00497475	1.01071	0.0153695	9	0.435573	0.885251	0.0529336	0.0271981	FALSE
103	EMM-Cys	0.993745	-0.00905205	1.00708	0.0101851	0.99127	-0.0126498	1.00535	0.0076945	18	0.602593	0.808184	0.0924897	0.0425893	FALSE
103	EMM-Met	0.97497	-0.0365702	0.988058	-0.0173331	0.986147	-0.0201259	1.00015	0.000218368	18	0.0379261	0.635459	0.196912	0.0409578	FALSE
103	EMMphlox-Act0.1	1.00638	0.00917961	1.01223	0.0175315	1.00831	0.0119381	1.00937	0.0134602	32	0.330527	0.794297	0.100017	0.0288905	FALSE
103	EMMphlox-Act1	1.01173	0.0168207	1.0176	0.0251726	1.00868	0.0124629	1.00974	0.013985	32	0.0938449	0.462228	0.335144	0.0316264	FALSE
103	EMMphlox-Act2	1.00857	0.0123128	1.01443	0.0206647	1.01347	0.0193047	1.01454	0.0208268	32	0.17973	0.743492	0.128724	0.0275117	FALSE
103	EMMphlox-Cana75	1.00516	0.00743152	1.011	0.0157834	1.01276	0.018298	1.01383	0.0198201	28	0.319599	0.605108	0.218167	0.0168016	FALSE
103	EMMphlox-EtOH0.1	1.01437	0.0205853	1.02026	0.0289372	1.01297	0.0185974	1.01404	0.0201195	32	0.0722269	0.855105	0.0679805	0.0380831	FALSE
103	YES-Bleo200	0.988205	-0.0171183	0.989367	-0.0154229	0.991167	-0.0127995	0.995523	-0.00647273	9	0.33028	0.734062	0.134267	0.0327464	FALSE
103	YES-Bleo300	1.04208	0.0594703	1.04331	0.0611656	1.04253	0.0600934	1.04712	0.0664202	3	0.161637	0.927189	0.0328319	0.0341231	FALSE
103	YES-Bleo600	1.0181	0.0258832	1.0193	0.0275786	1.0111	0.0159317	1.01555	0.0222585	6	0.266778	0.630015	0.200649	0.0348963	FALSE
103	YES-Bortezomib100	1.01432	0.0205181	1.01552	0.0222135	1.02024	0.0289095	1.02472	0.0352363	9	0.239088	0.598558	0.222894	0.0324824	FALSE
103	YES-Bortezomib200	1.0178	0.0254586	1.019	0.0271539	1.00909	0.0130488	1.01352	0.0193756	9	0.16549	0.393038	0.405566	0.033884	FALSE
103	YES-Bref60	1.04298	0.0607121	1.04421	0.0624075	1.01042	0.014961	1.01486	0.0212878	8	0.484305	0.698871	0.155603	0.164571	FALSE
103	YES-Calco10KCl0.5	0.995586	-0.00638248	0.996756	-0.00468713	0.996595	-0.00492086	1.00098	0.00140594	9	0.64229	0.838976	0.0762505	0.0254185	FALSE
103	YES-Calco2	1.00867	0.0124506	1.00985	0.0141459	0.995624	-0.00632681	1	0	9	0.27664	0.670999	0.173278	0.0200478	FALSE
103	YES-Calco4KCl0.5	0.998538	-0.00211005	0.999713	-0.000414699	0.995624	-0.00632681	1	0	9	0.812275	0.948608	0.0229132	0.0143797	FALSE
103	YES-Cana120	1.00216	0.00311802	1.00334	0.00481336	0.990039	-0.0144426	0.99439	-0.00811576	9	0.85352	0.932203	0.0304895	0.0324116	FALSE
103	YES-Cana60	1.01351	0.0193553	1.0147	0.0210506	1.00652	0.00937768	1.01094	0.0157045	9	0.334323	0.560482	0.251438	0.0382575	FALSE
103	YES-CoCl0.25	0.981213	-0.0273624	0.982366	-0.0256671	0.98393	-0.0233719	0.988255	-0.0170451	9	0.0207131	0.264175	0.578109	0.0186652	FALSE
103	YES-CoCl5	0.972293	-0.0405373	0.973436	-0.0388419	0.996301	-0.00534649	1.00068	0.000980322	9	0.439117	0.658675	0.181329	0.101725	FALSE
103	YES-Cycloh100	1.00904	0.0129765	1.01022	0.0146718	1.00586	0.00843503	1.01028	0.0147618	9	0.075146	0.5555	0.255316	0.00971288	FALSE
103	YES-Cycloh200	1.01019	0.0146279	1.01138	0.0163233	1.00842	0.0120918	1.01285	0.0184186	9	0.0290526	0.3312	0.47991	0.0078214	FALSE
103	YES-Cycloh400	1.01271	0.0182279	1.01391	0.0199233	1.00417	0.00600156	1.00858	0.0123284	9	0.179987	0.547369	0.26172	0.024319	FALSE
103	YES-Cycloh600	1.01847	0.0264026	1.01967	0.028098	1.00969	0.0139186	1.01413	0.0202454	9	0.0158001	0.257316	0.589533	0.0172258	FALSE
103	YES-Dhcumarin100	0.996275	-0.0053837	0.997447	-0.00368836	0.998299	-0.00245645	1.00269	0.00387036	9	0.711316	0.860682	0.0651571	0.0272261	FALSE
103	YES-Dhcumarin200	0.988043	-0.0173544	0.989205	-0.015659	0.995624	-0.00632681	1	0	9	0.228519	0.648252	0.188256	0.0258723	FALSE
103	YES-Dhcumarin50	0.993944	-0.00876355	0.995113	-0.00706821	0.999633	-0.000530112	1.00403	0.0057967	9	0.611928	0.807613	0.0927969	0.0328673	FALSE
103	YES-EDTA0.1	1.0186	0.0265923	1.0198	0.0282876	1.02052	0.0292985	1.025	0.0356253	9	0.0528801	0.481845	0.317093	0.0234816	FALSE
103	YES-EDTA0.3	1.02164	0.0308894	1.02284	0.0325847	1.02399	0.0342031	1.02849	0.04053	9	0.015577	0.229742	0.638759	0.0206094	FALSE
103	YES-EDTA0.6	1.02199	0.0313853	1.02319	0.0330807	1.02735	0.0389293	1.03187	0.0452561	9	0.0333721	0.475553	0.322801	0.0249458	FALSE
103	YES-EtOH5	1.01761	0.0251782	1.0188	0.0268736	1.0177	0.0253097	1.02217	0.0316365	9	0.0299607	0.281973	0.549792	0.0188968	FALSE
103	YES-Forma2	1.0111	0.0159312	1.01229	0.0176266	1.00398	0.00573495	1.0084	0.0120618	9	0.0910167	0.399073	0.398947	0.015002	FALSE
103	YES-Forma3	0.997942	-0.00297174	0.999116	-0.0012764	0.989611	-0.0150665	0.99396	-0.00873968	9	0.685931	0.819206	0.0866068	0.010187	FALSE
103	YES-HU30	1.01824	0.0260724	1.01943	0.0277677	0.999622	-0.00054482	1.00402	0.00578199	9	0.206401	0.470594	0.327354	0.0387618	FALSE
103	YES-HU45	1.02544	0.0362486	1.02665	0.0379439	1.0141	0.0202067	1.01856	0.0265335	8	0.084247	0.474814	0.323476	0.0352001	FALSE
103	YES-KCl0.5SDS0.01	1.00371	0.00534602	1.00489	0.00704137	0.995624	-0.00632681	1	0	9	0.68696	0.889926	0.0506462	0.0245398	FALSE
103	YES-KCl1SDS0.01	1.01401	0.0200744	1.0152	0.0217697	1.00669	0.00961315	1.01111	0.01594	9	0.23661	0.53947	0.268033	0.031517	FALSE
103	YES-Ovana3	1.02208	0.031506	1.02328	0.0332014	1.01648	0.0235872	1.02095	0.029914	7	0.539639	0.732842	0.134989	0.0895265	FALSE
103	YES-Ovana6	1.03842	0.0543872	1.03964	0.0560826	1.06436	0.0899828	1.06904	0.0963096	8	0.225903	0.634283	0.197717	0.0815067	FALSE
103	YES-SDS0.01	0.996837	-0.00457032	0.998009	-0.00287498	0.991857	-0.0117964	0.996216	-0.00546955	12	0.807157	0.851999	0.0695611	0.0420925	FALSE
103	YES-SDS0.02	1.01406	0.0201362	1.01525	0.0218315	1.0198	0.0282832	1.02428	0.03461	7	0.140705	0.320808	0.493754	0.0208139	FALSE
103	YES-TBH15	0.840257	-0.251097	0.841245	-0.249402	0.879843	-0.184681	0.88371	-0.178355	3	0.121939	0.767263	0.115056	0.107031	FALSE
103	YES-UV1000	1.00146	0.00210575	1.00264	0.0038011	1.00272	0.00391337	1.00712	0.0102402	9	0.906746	0.966066	0.0149934	0.034721	FALSE
103	YES-UV10m	1.01466	0.0209909	1.01585	0.0226863	1.00945	0.0135708	1.01389	0.0198976	9	0.155284	0.610426	0.214367	0.0265937	FALSE
103	YES-UV2000	1.03606	0.0511075	1.03728	0.0528029	1.02231	0.0318318	1.0268	0.0381586	9	0.0689609	0.63122	0.199819	0.0510712	FALSE
103	YES-UV20m	1.00769	0.0110496	1.00887	0.0127449	1.0031	0.00445915	1.0075	0.010786	9	0.178036	0.495026	0.305372	0.0123298	FALSE
103	YES-UV3000	1.00848	0.012181	1.00966	0.0138764	1.00607	0.00872723	1.01049	0.015054	9	0.144913	0.81055	0.0912202	0.0126523	FALSE
103	YES-UV4000	1.01255	0.0179885	1.01374	0.0196839	1.00222	0.00320077	1.00663	0.00952758	9	0.0901329	0.604735	0.218435	0.0175877	FALSE
103	YES-UV5m	0.995431	-0.0066068	0.996601	-0.00491145	0.98645	-0.0196819	0.990786	-0.0133551	9	0.521404	0.825556	0.0832537	0.0176532	FALSE
103	YES-UV6000	1.00341	0.00490922	1.00459	0.00660457	1.00186	0.00268344	1.00626	0.00901024	9	0.520712	0.791483	0.101559	0.0110585	FALSE
103	YES-UV9000	1.00167	0.00240114	1.00284	0.00409649	0.999585	-0.000599248	1.00398	0.00572756	9	0.735667	0.921605	0.035455	0.00951764	FALSE
103	YES-VPA5	1.01482	0.0212242	1.01601	0.0229196	1.00901	0.0129376	1.01344	0.0192644	9	0.0573353	0.227805	0.642437	0.0184631	FALSE
103	YESphlox-Act0.1	1.01366	0.0195744	1.01522	0.0217936	0.997357	-0.0038185	1.00103	0.00148476	32	0.359784	0.861122	0.0649351	0.0822357	FALSE
103	YESphlox-Act1	1.00216	0.00310983	1.0037	0.00532897	0.996331	-0.00530327	1	0	32	0.828183	0.976737	0.0102223	0.0542757	FALSE
103	YESphlox-Act2	1.01342	0.0192285	1.01498	0.0214477	1.00024	0.000344075	1.00392	0.00564734	32	0.469603	0.797869	0.0980685	0.103006	FALSE
103	YESphlox-stationary7	0.998973	-0.00148172	1.00051	0.000737418	0.994669	-0.00771174	0.998332	-0.00240848	28	0.821057	0.909717	0.0410939	0.0203708	FALSE
103	YESphlox-Benza12	1.0067	0.00963873	1.00825	0.0118579	1.00396	0.00569854	1.00766	0.0110018	9	0.11251	0.470611	0.327338	0.00977373	FALSE
103	YESphlox-Benza4	0.995082	-0.00711253	0.996614	-0.0048934	0.99876	-0.00178994	1.00244	0.00351333	9	0.412628	0.734994	0.133716	0.0158608	FALSE
103	YESphlox-Benza8	1.00387	0.00557029	1.00541	0.00778942	1.00035	0.00050328	1.00403	0.00580655	9	0.396365	0.706026	0.151179	0.0112681	FALSE
103	YESphlox-Bort500	1.03591	0.050902	1.03751	0.0531212	1.03815	0.0540217	1.04198	0.0593249	8	0.0104355	0.0915109	1.03853	0.029534	FALSE
103	YESphlox-CdCl1	1.02471	0.035214	1.02629	0.0374331	1.03078	0.0437336	1.03457	0.0490369	11	0.578364	0.892256	0.0495108	0.142693	FALSE
103	YESphlox-Diamide2	0.999861	-0.000200646	1.0014	0.00201849	0.996298	-0.00535075	0.999967	-4.74877e-05	9	0.988915	0.994664	0.00232372	0.0283769	FALSE
103	YESphlox-Diamide3	0.997915	-0.00301062	0.999452	-0.000791486	0.996331	-0.00530327	1	0	9	0.893986	0.960713	0.0174063	0.045043	FALSE
103	YESphlox-Diamide3.5	0.996949	-0.00440871	0.998483	-0.00218957	1.00814	0.0116916	1.01185	0.0169948	9	0.878352	0.968273	0.0140022	0.0576314	FALSE
103	YESphlox-EDTA4	1.00893	0.0128312	1.01049	0.0150503	1.00658	0.00946535	1.01029	0.0147686	9	0.385481	0.761284	0.118453	0.0285584	FALSE
103	YESphlox-EGTA1	1.00727	0.0104526	1.00882	0.0126718	1.00742	0.0106642	1.01113	0.0159674	9	0.428143	0.914659	0.0387409	0.0253933	FALSE
103	YESphlox-EGTA10	1.12396	0.16859	1.12569	0.17081	1.06854	0.0956473	1.07248	0.100951	9	0.0805348	0.362952	0.440151	0.186182	FALSE
103	YESphlox-EGTA15									0					FALSE
103	YESphlox-EGTA5	1.0024	0.00345252	1.00394	0.00567165	1.01274	0.0182633	1.01647	0.0235665	9	0.71374	0.96353	0.0161349	0.0177386	FALSE
103	YESphlox-EtOH0.1	1.03217	0.0456823	1.03376	0.0479015	1.01565	0.0224085	1.01939	0.0277118	32	0.0142074	0.672481	0.17232	0.0691533	FALSE
103	YESphlox-EtOH10	1.00862	0.0123809	1.01017	0.0146	0.997362	-0.00381017	1.00104	0.00149309	7	0.693623	0.956864	0.0191498	0.0549443	FALSE
103	YESphlox-Forma2.5	1.01144	0.0164173	1.013	0.0186364	1.0094	0.0134998	1.01312	0.0188031	14	0.121351	0.475291	0.32304	0.0247186	FALSE
103	YESphlox-Gluc0.1stationary7	0.995195	-0.00694856	0.996727	-0.00472943	0.995011	-0.0072157	0.998675	-0.00191244	18	0.385337	0.629128	0.201261	0.0208134	FALSE
103	YESphlox-Gluc0.5stationary7	0.999304	-0.00100391	1.00084	0.00121522	0.997442	-0.0036958	1.00111	0.00160746	36	0.844744	0.900529	0.0455024	0.0158376	FALSE
103	YESphlox-Gluc1stationary7	1.0168	0.0240391	1.01837	0.0262582	1.00256	0.00368532	1.00625	0.00898859	28	0.113907	0.407781	0.389573	0.0532287	FALSE
103	YESphlox-Glycerol2	1.00164	0.00237111	1.00319	0.00459024	1.00359	0.00517132	1.00729	0.0104746	9	0.791019	0.954584	0.0201859	0.0167591	FALSE
103	YESphlox-Glycerol2MMS0.0075	0.978112	-0.031929	0.979617	-0.0297098	0.965038	-0.0513427	0.968592	-0.0460394	9	0.0502838	0.260561	0.58409	0.028257	FALSE
103	YESphlox-Glycerol3	1.00104	0.0015049	1.00258	0.00372404	0.996331	-0.00530327	1	0	9	0.827081	0.960949	0.0172996	0.0121671	FALSE
103	YESphlox-Glycerol3MMS0.005	0.986027	-0.0203015	0.987544	-0.0180824	0.991854	-0.0118003	0.995507	-0.00649702	9	0.0827995	0.26969	0.569135	0.0205938	FALSE
103	YESphlox-HP10	0.979477	-0.0299164	0.980985	-0.0276973	0.999803	-0.000284329	1.00348	0.00501894	27	0.515641	0.833481	0.0791041	0.161608	FALSE
103	YESphlox-HP15	0.984745	-0.0221782	0.986261	-0.0199591	0.992471	-0.0109032	0.996126	-0.00559994	9	0.808397	0.939832	0.0269498	0.182744	FALSE
103	YESphlox-HP2	1.01681	0.0240562	1.01838	0.0262753	1.00516	0.00742826	1.00886	0.0127315	33	0.0387721	0.344102	0.463312	0.0431153	FALSE
103	YESphlox-HP4	1.00462	0.00665211	1.00617	0.00887125	1.00652	0.00938255	1.01023	0.0146858	57	0.566333	0.779387	0.108247	0.0579316	FALSE
103	YESphlox-HP6	1.02069	0.0295395	1.02226	0.0317587	1.01338	0.0191778	1.01711	0.024481	52	0.0109313	0.0862358	1.06431	0.0542948	FALSE
103	YESphlox-HP8	1.01872	0.0267566	1.02029	0.0289758	1.01293	0.0185371	1.01666	0.0238404	27	0.415112	0.758093	0.120277	0.117025	FALSE
103	YESphlox-HU8	1.04576	0.0645491	1.04737	0.0667683	1.01555	0.0222542	1.01928	0.0275574	9	0.0846172	0.290567	0.536753	0.0697023	FALSE
103	YESphlox-HU8MMS0.075	1.03174	0.0450814	1.03333	0.0473005	1.02831	0.0402818	1.0321	0.0455851	9	0.0227599	0.259463	0.585925	0.0338163	FALSE
103	YESphlox-KCl0.5	1.01092	0.0156621	1.01247	0.0178812	1.00887	0.0127369	1.01258	0.0180402	9	0.123454	0.538865	0.26852	0.0182614	FALSE
103	YESphlox-KCl0.5SDS0.004	1.01921	0.0274473	1.02078	0.0296664	1.0163	0.0233209	1.02004	0.0286241	9	0.0704439	0.308869	0.510225	0.027269	FALSE
103	YESphlox-KCl1	0.938547	-0.0914992	0.939992	-0.0892801	0.984406	-0.022674	0.988032	-0.0173707	9	0.239228	0.524462	0.280286	0.145084	FALSE
103	YESphlox-LiCl4	1.0075	0.010785	1.00905	0.0130041	1.00354	0.00509152	1.00723	0.0103948	9	0.2891	0.723348	0.140653	0.0188889	FALSE
103	YESphlox-LiCl6	1.03027	0.0430236	1.03186	0.0452427	1.01563	0.0223742	1.01937	0.0276775	9	0.0968676	0.298457	0.525118	0.0481185	FALSE
103	YESphlox-MMS0.005	0.981583	-0.0268178	0.983094	-0.0245987	0.983117	-0.0245651	0.986737	-0.0192618	9	0.0375347	0.166929	0.777469	0.0218828	FALSE
103	YESphlox-MMS0.075	0.985794	-0.0206417	0.987312	-0.0184226	0.989537	-0.0151738	0.993182	-0.00987057	18	0.0135339	0.0551024	1.25883	0.0204495	FALSE
103	YESphlox-NaCl150	0.994203	-0.0083874	0.995734	-0.00616827	0.998316	-0.00243221	1.00199	0.00287106	9	0.582773	0.877703	0.0566524	0.0297216	FALSE
103	YESphlox-NaCl150MMS0.005	0.991163	-0.0128055	0.992689	-0.0105864	0.998473	-0.00220445	1.00215	0.00309881	9	0.303156	0.691195	0.1604	0.0233364	FALSE
103	YESphlox-Ovana0.5	1.03471	0.0492208	1.0363	0.0514399	1.03178	0.0451392	1.03558	0.0504425	9	0.0240612	0.262555	0.58078	0.0374691	FALSE
103	YESphlox-Ovana1	1.0368	0.0521344	1.03839	0.0543535	1.01709	0.0244443	1.02083	0.0297476	8	0.0596916	0.389841	0.409113	0.0463187	FALSE
103	YESphlox-Ovana4	0.979092	-0.0304833	0.980599	-0.0282642	0.962102	-0.055738	0.965645	-0.0504348	11	0.552785	0.855188	0.0679386	0.112833	FALSE
103	YESphlox-Phloxine2	1.01254	0.0179756	1.0141	0.0201948	1.00772	0.0110947	1.01143	0.016398	9	0.52908	0.92696	0.0329388	0.0568954	FALSE
103	YESphlox-Phloxine2HP10	0.975649	-0.0355652	0.977151	-0.033346	0.994649	-0.00774028	0.998312	-0.00243701	9	0.514674	0.733411	0.134653	0.107133	FALSE
103	YESphlox-Phloxine2HP15	1.00765	0.0109919	1.0092	0.013211	1.00142	0.00204116	1.0051	0.00734443	9	0.887831	0.946461	0.0238972	0.157675	FALSE
103	YESphlox-SDS0.004	1.00412	0.005937	1.00567	0.00815614	1.00816	0.0117182	1.01187	0.0170214	9	0.456517	0.832512	0.0796095	0.0144608	FALSE
103	YESphlox-TBH1	0.997856	-0.0030971	0.999392	-0.000877963	0.994838	-0.00746685	0.998501	-0.00216358	9	0.509597	0.691596	0.160148	0.00655348	FALSE
103	YESphlox-TBH1.5	1.01278	0.0183193	1.01434	0.0205385	1.03255	0.0462058	1.03635	0.0515091	3	0.819176	0.900282	0.0456212	0.0852074	FALSE
103	YESphlox-TSA1000	1.00235	0.00338744	1.00389	0.00560657	1.00367	0.00528531	1.00737	0.0105886	14	0.750026	0.873997	0.0584901	0.025695	FALSE
103	YESphlox-TSA500	1.0001	0.000141417	1.00164	0.00236055	0.997828	-0.00313734	1.0015	0.00216592	14	0.988258	0.993499	0.00283246	0.0229427	FALSE
103	YESphlox-TeaTree1	1.00165	0.00237849	1.00319	0.00459762	0.996986	-0.00435449	1.00066	0.000948773	9	0.782813	0.892407	0.0494371	0.0160602	FALSE
103	YESphlox-TeaTree10	0.998657	-0.00193886	1.00019	0.00028027	0.996331	-0.00530327	1	0	9	0.750482	0.88201	0.0545264	0.0102644	FALSE
103	YESphlox-TeaTree100	1.00411	0.00591311	1.00565	0.00813224	1.00152	0.00219457	1.00521	0.00749784	9	0.542942	0.951799	0.0214546	0.018297	FALSE
103	YESphlox-Temp25	1.00255	0.00367688	1.0041	0.00589601	1.00155	0.00223754	1.00524	0.00754081	14	0.761233	0.916374	0.0379273	0.0296171	FALSE
103	YESphlox-Temp25Gluc0.1	1.00771	0.0110796	1.00926	0.0132988	1.00405	0.0058272	1.00774	0.0111305	18	0.277211	0.509284	0.29304	0.0276167	FALSE
103	YESphlox-Temp25Gluc0.5	0.998996	-0.00144861	1.00053	0.00077052	1.00019	0.000267276	1.00387	0.00557054	18	0.867925	0.928558	0.0321908	0.0232882	FALSE
103	YESphlox-Temp25Gluc1	1.01011	0.0145093	1.01166	0.0167285	1.00821	0.0117993	1.01193	0.0171025	28	0.0586591	0.187753	0.726412	0.0245496	FALSE
103	YESphlox-Temp25Gluc3	1.00386	0.00555502	1.0054	0.00777416	1.00351	0.0050571	1.00721	0.0103604	14	0.615206	0.96905	0.0136538	0.0267682	FALSE
103	YESphlox-Tuni20	1.03193	0.0453478	1.03352	0.047567	1.02741	0.0390081	1.03119	0.0443113	7	0.55258	0.922873	0.0348582	0.134427	FALSE
103	YESphlox-Tuni40	1.01842	0.0263391	1.01999	0.0285582	1.05914	0.082898	1.06304	0.0882013	12	0.493003	0.763737	0.117056	0.0898191	FALSE
103	YESphlox-Tuni60	0.993293	-0.00970867	0.994822	-0.00748954	0.998349	-0.0023834	1.00203	0.00291987	10	0.890583	0.977931	0.00969185	0.149941	FALSE
103	YESphlox-Tuni80	1.00856	0.0123021	1.01012	0.0145212	1.01641	0.0234856	1.02016	0.0287888	12	0.472997	0.880822	0.0551119	0.0392478	FALSE
103	YESphlox-VPA10	1.00394	0.00566923	1.00548	0.00788836	1.00198	0.00285829	1.00567	0.00816156	11	0.702522	0.840624	0.075398	0.0324373	FALSE
103	YESphlox-VPA8	1.00999	0.0143476	1.01155	0.0165667	0.997525	-0.00357565	1.0012	0.00172762	12	0.394604	0.734402	0.134066	0.0384065	FALSE
103	YESphlox-Xylose2	1.00644	0.00926159	1.00799	0.0114807	1.00057	0.000816388	1.00425	0.00611965	9	0.575107	0.829901	0.0809739	0.0324702	FALSE
103	Yesphlox-Caffeine10	1.0151	0.021622	1.01666	0.0238412	0.993894	-0.00883629	0.997554	-0.00353302	24	0.489889	0.875922	0.0575345	0.104981	FALSE
103	Yesphlox-DMSO	1.00326	0.0046889	1.0048	0.00690804	1.00062	0.000899187	1.00431	0.00620245	32	0.74984	0.997352	0.00115156	0.0557953	FALSE
103	Yesphlox-Gal2	1.02095	0.0299095	1.02252	0.0321286	1.01931	0.0275988	1.02307	0.032902	32	0.154769	0.480265	0.318519	0.0803708	FALSE
103	Yesphlox-Rapa1	0.99948	-0.000749907	1.00102	0.00146923	0.996331	-0.00530327	1	0	32	0.958871	0.976807	0.0101913	0.0550691	FALSE
103	Yesphlox-Rapa100	1.0105	0.0150741	1.01206	0.0172933	0.996331	-0.00530327	1	0	31	0.493443	0.742917	0.12906	0.0834902	FALSE
103	Yesphlox-Sorb1.2	1.02162	0.0308602	1.02319	0.0330793	1.03195	0.0453787	1.03575	0.050682	32	0.0469509	0.855829	0.0676129	0.0579079	FALSE
103	Yesphlox-Torin5	1.02207	0.0314964	1.02365	0.0337155	1.01308	0.0187515	1.01681	0.0240548	32	0.281752	0.70431	0.152236	0.113416	FALSE
1039	EMM-3AT4	0.988659	-0.0164555	0.99601	-0.00576736	0.997832	-0.00313128	0.997962	-0.00294355	15	0.119714	0.584027	0.233567	0.0213472	FALSE
1039	EMM-3AT6	0.988072	-0.017312	0.995419	-0.00662384	0.988475	-0.0167235	0.988604	-0.0165357	15	0.127408	0.537029	0.270002	0.0238437	FALSE
1039	EMM-Bleo200	1.00007	0.000102448	1.00751	0.0107906	1.00344	0.00495215	1.00357	0.00513988	15	0.990373	0.990373	0.0042011	0.0144146	FALSE
1039	EMM-Canav60	1.00695	0.00999879	1.01444	0.0206869	1.0138	0.019766	1.01393	0.0199537	15	0.389729	0.885251	0.0529336	0.0255134	FALSE
1039	EMM-Cys	1.00671	0.00965454	1.0142	0.0203427	1.004	0.00576338	1.00413	0.00595111	29	0.343299	0.635636	0.196791	0.0291113	FALSE
1039	EMM-Met	0.984483	-0.0225615	0.991804	-0.0118733	0.998985	-0.00146436	0.999116	-0.00127663	30	0.18044	0.704828	0.151917	0.0575855	FALSE
1039	EMMphlox-Act0.1	0.984469	-0.0225823	0.994852	-0.00744565	0.994503	-0.00795235	1	0	36	0.154297	0.608616	0.215657	0.0536036	FALSE
1039	EMMphlox-Act1	0.993356	-0.00961662	1.00383	0.00552001	0.999305	-0.00100254	1.00483	0.0069498	36	0.572177	0.862946	0.0640163	0.060254	FALSE
1039	EMMphlox-Act2	0.98275	-0.0251035	0.993115	-0.00996685	0.994503	-0.00795235	1	0	35	0.0592314	0.646989	0.189103	0.0393557	FALSE
1039	EMMphlox-Cana75	1.00857	0.0123066	1.0192	0.0274433	1.00268	0.0038642	1.00822	0.0118165	38	0.308076	0.599272	0.222376	0.0351359	FALSE
1039	EMMphlox-EtOH0.1	0.987567	-0.0180495	0.997983	-0.00291288	0.998159	-0.0026586	1.00368	0.00529374	36	0.394979	0.855105	0.0679805	0.0794994	FALSE
1039	YES-Bleo200	0.994486	-0.00797717	0.990158	-0.0142688	1	0	1	0	15	0.502784	0.869883	0.0605391	0.0273039	FALSE
1039	YES-Bleo300	1.01051	0.0150905	1.00612	0.00879887	0.995852	-0.00599682	0.995852	-0.00599682	5	0.580581	0.927189	0.0328319	0.0383159	FALSE
1039	YES-Bleo600	1.00537	0.00772315	1.00099	0.00143148	1.00627	0.00901572	1.00627	0.00901572	10	0.518972	0.810449	0.0912742	0.0223915	FALSE
1039	YES-Bortezomib100	1.00733	0.010533	1.00294	0.00424135	0.999064	-0.0013514	0.999064	-0.0013514	15	0.280662	0.659851	0.180554	0.0207895	FALSE
1039	YES-Bortezomib200	1.01686	0.024116	1.01243	0.0178244	1.00193	0.00277488	1.00193	0.00277488	15	0.0745804	0.257641	0.588985	0.031165	FALSE
1039	YES-Bref60	0.992317	-0.0111273	0.987999	-0.017419	0.917386	-0.124399	0.917386	-0.124399	15	0.861334	0.918342	0.0369957	0.165876	FALSE
1039	YES-Calco10KCl0.5	0.969832	-0.0441938	0.965611	-0.0504854	0.995158	-0.00700313	0.995158	-0.00700313	15	0.158204	0.460488	0.336782	0.0768712	FALSE
1039	YES-Calco2	0.969326	-0.044946	0.965108	-0.0512376	0.999394	-0.000874378	0.999394	-0.000874378	15	0.218262	0.616792	0.209861	0.0907248	FALSE
1039	YES-Calco4KCl0.5	0.981021	-0.0276438	0.976752	-0.0339355	0.990073	-0.0143939	0.990073	-0.0143939	14	0.185089	0.620591	0.207194	0.04881	FALSE
1039	YES-Cana120	0.975356	-0.0359998	0.971111	-0.0422914	1.00115	0.00165478	1.00115	0.00165478	15	0.36645	0.679356	0.167902	0.100826	FALSE
1039	YES-Cana60	0.961039	-0.0573336	0.956857	-0.0636253	0.995472	-0.00654777	0.995472	-0.00654777	15	0.231725	0.515193	0.28803	0.119383	FALSE
1039	YES-CoCl0.25	1.00124	0.00179465	0.996888	-0.00449703	1	0	1	0	15	0.864414	0.973225	0.0117869	0.023339	FALSE
1039	YES-CoCl5	1.00234	0.00337361	0.997979	-0.00291806	0.997867	-0.00308025	0.997867	-0.00308025	15	0.603847	0.791421	0.101592	0.00838931	FALSE
1039	YES-Cycloh100	1.00601	0.00864042	1.00163	0.00234874	1	0	1	0	15	0.364525	0.826745	0.0826284	0.0201017	FALSE
1039	YES-Cycloh200	0.999244	-0.0010914	0.994896	-0.00738308	0.988847	-0.0161804	0.988847	-0.0161804	14	0.896072	0.972878	0.0119416	0.0156251	FALSE
1039	YES-Cycloh400	1.01801	0.0257551	1.01358	0.0194635	1.01774	0.0253752	1.01774	0.0253752	15	0.0375593	0.432047	0.364469	0.0276141	FALSE
1039	YES-Cycloh600	1.01512	0.0216567	1.01071	0.0153651	1.01089	0.0156266	1.01089	0.0156266	15	0.0130436	0.247829	0.605848	0.0166669	FALSE
1039	YES-Dhcumarin100	1.0125	0.017928	1.0081	0.0116363	1.00626	0.00899738	1.00626	0.00899738	15	0.0464613	0.39224	0.406449	0.0178795	FALSE
1039	YES-Dhcumarin200	1.01076	0.015443	1.00636	0.00915131	1.00146	0.00210927	1.00146	0.00210927	15	0.130503	0.535094	0.27157	0.0219472	FALSE
1039	YES-Dhcumarin50	1.0095	0.013648	1.00511	0.00735629	0.999173	-0.00119386	0.999173	-0.00119386	15	0.126152	0.442437	0.354149	0.0178774	FALSE
1039	YES-EDTA0.1	1.01158	0.0166108	1.00718	0.0103191	1.00766	0.0110109	1.00766	0.0110109	15	0.0393802	0.481845	0.317093	0.0147252	FALSE
1039	YES-EDTA0.3	1.00669	0.00961695	1.00231	0.00332528	1.01126	0.0161504	1.01126	0.0161504	15	0.359898	0.7516	0.124013	0.0231712	FALSE
1039	YES-EDTA0.6	0.994725	-0.00763005	0.990397	-0.0139217	0.990234	-0.0141579	0.990234	-0.0141579	15	0.451063	0.829861	0.0809948	0.0218785	FALSE
1039	YES-EtOH5	1.00303	0.00437028	0.998669	-0.00192139	0.994526	-0.00791915	0.994526	-0.00791915	15	0.603983	0.971301	0.0126463	0.0164524	FALSE
1039	YES-Forma2	1.01332	0.01909	1.00891	0.0127983	1.01024	0.0147	1.01024	0.0147	15	0.033648	0.22564	0.646585	0.0177387	FALSE
1039	YES-Forma3	1.00727	0.0104572	1.00289	0.00416555	1.00027	0.000385094	1.00027	0.000385094	15	0.188609	0.537536	0.269592	0.0146038	FALSE
1039	YES-HU30	1.00628	0.009035	1.0019	0.00274333	1.00255	0.00367188	1.00255	0.00367188	14	0.364683	0.577415	0.238512	0.0207382	FALSE
1039	YES-HU45	0.993775	-0.00900843	0.989451	-0.0153001	0.995629	-0.00632004	0.995629	-0.00632004	15	0.558987	0.885063	0.0530256	0.0373815	FALSE
1039	YES-KCl0.5SDS0.01	0.960471	-0.0581864	0.956291	-0.0644781	0.987563	-0.018055	0.987563	-0.018055	14	0.148423	0.436203	0.360311	0.0950007	FALSE
1039	YES-KCl1SDS0.01	0.910989	-0.134494	0.907025	-0.140786	0.967286	-0.0479858	0.967286	-0.0479858	15	0.0404199	0.209449	0.678923	0.151537	FALSE
1039	YES-Ovana3	1.00003	3.92872e-05	0.995676	-0.00625239	0.9934	-0.00955357	0.9934	-0.00955357	12	0.999075	0.999075	0.000401768	0.0781568	FALSE
1039	YES-Ovana6	1.02031	0.0290074	1.01587	0.0227157	0.986717	-0.019291	0.986717	-0.019291	13	0.229697	0.634283	0.197717	0.0562139	FALSE
1039	YES-SDS0.01	0.977488	-0.0328485	0.973235	-0.0391401	0.998437	-0.00225612	0.998437	-0.00225612	18	0.382909	0.637384	0.195599	0.104987	FALSE
1039	YES-SDS0.02	0.997174	-0.00408327	0.992834	-0.0103749	0.990477	-0.0138044	0.990477	-0.0138044	13	0.74455	0.842689	0.0743328	0.0272378	FALSE
1039	YES-TBH15	1.01903	0.0271902	1.01459	0.0208985	0.987034	-0.0188277	0.987034	-0.0188277	7	0.555969	0.80899	0.0920571	0.0798767	FALSE
1039	YES-UV1000	1.00073	0.00104924	0.996373	-0.00524243	0.996289	-0.00536388	0.996289	-0.00536388	15	0.954482	0.980141	0.00871135	0.0459933	FALSE
1039	YES-UV10m	1.01135	0.0162777	1.00695	0.00998606	1.01365	0.019553	1.01365	0.019553	15	0.151909	0.610426	0.214367	0.025429	FALSE
1039	YES-UV2000	0.959042	-0.0603336	0.954869	-0.0666253	1.00195	0.00280728	1.00195	0.00280728	15	0.296653	0.738614	0.131582	0.145018	FALSE
1039	YES-UV20m	0.995153	-0.0070091	0.990823	-0.0133008	1	0	1	0	15	0.778007	0.953685	0.0205949	0.0633599	FALSE
1039	YES-UV3000	1.00408	0.00587915	0.999714	-0.00041252	1.00147	0.00211975	1.00147	0.00211975	15	0.504575	0.926811	0.0330089	0.017773	FALSE
1039	YES-UV4000	1.00544	0.00782592	1.00106	0.00153425	1.00976	0.0140137	1.00976	0.0140137	14	0.552187	0.854756	0.0681581	0.0301167	FALSE
1039	YES-UV5m	1.01869	0.0267183	1.01426	0.0204266	1.01286	0.0184324	1.01286	0.0184324	15	0.137149	0.622864	0.205606	0.043708	FALSE
1039	YES-UV6000	1.00388	0.00558828	0.999513	-0.000703399	1.0004	0.000572189	1.0004	0.000572189	15	0.504573	0.777315	0.109403	0.0162538	FALSE
1039	YES-UV9000	1.01293	0.0185413	1.00853	0.0122496	1.00806	0.0115825	1.00806	0.0115825	15	0.00891765	0.135015	0.869618	0.0108716	FALSE
1039	YES-VPA5	0.996204	-0.00548732	0.991869	-0.011779	1.00295	0.00424262	1.00295	0.00424262	15	0.735918	0.883102	0.0539891	0.0399557	FALSE
1039	YESphlox-Act0.1	0.998833	-0.00168488	1.00102	0.00147683	0.997221	-0.00401427	0.999758	-0.000348512	36	0.887334	0.988849	0.00486994	0.0470639	FALSE
1039	YESphlox-Act1	0.987231	-0.0185398	0.989397	-0.015378	0.997584	-0.00348935	1.00012	0.000176414	36	0.434341	0.913949	0.0390778	0.0960468	FALSE
1039	YESphlox-Act2	1.00386	0.00555738	1.00606	0.0087191	0.996399	-0.00520424	0.998934	-0.00153848	36	0.872605	0.918533	0.036905	0.142966	FALSE
1039	YESphlox-stationary7	1.00711	0.0102267	1.00932	0.0133884	1.00456	0.00655761	1.00711	0.0102234	38	0.0810257	0.83279	0.0794643	0.0199683	FALSE
1039	YESphlox-Benza12	1.00849	0.0122018	1.01071	0.0153635	1.00725	0.0104223	1.00981	0.0140881	14	0.0934588	0.438178	0.358349	0.0157971	FALSE
1039	YESphlox-Benza4	1.02998	0.0426227	1.03224	0.0457844	1.01035	0.014859	1.01292	0.0185247	12	0.146535	0.663592	0.178099	0.066268	FALSE
1039	YESphlox-Benza8	1.00609	0.00876311	1.0083	0.0119248	1.00112	0.00161899	1.00367	0.00528475	13	0.0993383	0.504354	0.297264	0.00970805	FALSE
1039	YESphlox-Bort500	1.01232	0.0176685	1.01454	0.0208302	1.00489	0.00703204	1.00744	0.0106978	15	0.0840204	0.252061	0.598494	0.0244579	FALSE
1039	YESphlox-CdCl1	0.987254	-0.0185066	0.98942	-0.0153449	0.985188	-0.0215297	0.987694	-0.017864	14	0.590783	0.892256	0.0495108	0.0862732	FALSE
1039	YESphlox-Diamide2	0.985007	-0.0217944	0.987168	-0.0186327	0.988443	-0.016771	0.990957	-0.0131052	15	0.219435	0.735754	0.133268	0.0444719	FALSE
1039	YESphlox-Diamide3	1.01197	0.0171631	1.01419	0.0203248	1.01448	0.0207431	1.01706	0.0244089	15	0.178247	0.483812	0.315323	0.0316913	FALSE
1039	YESphlox-Diamide3.5	0.99657	-0.00495707	0.998756	-0.00179535	0.989978	-0.0145311	0.992497	-0.0108653	15	0.772966	0.913756	0.0391698	0.0443639	FALSE
1039	YESphlox-EDTA4	0.991981	-0.0116149	0.994158	-0.00845318	0.993985	-0.00870426	0.996514	-0.0050385	15	0.572126	0.847044	0.0720942	0.0530625	FALSE
1039	YESphlox-EGTA1	1.00605	0.00870155	1.00826	0.0118633	1.00703	0.0101021	1.00959	0.0137679	14	0.131659	0.652571	0.185372	0.0115743	FALSE
1039	YESphlox-EGTA10	1.01583	0.0226624	1.01806	0.0258241	1.01934	0.0276402	1.02194	0.0313059	14	0.382854	0.651424	0.186136	0.0651968	FALSE
1039	YESphlox-EGTA15	0.940081	-0.0891427	0.942144	-0.085981	0.972782	-0.0398116	0.975257	-0.0361459	5	0.24576	0.969582	0.0134153	0.0987659	FALSE
1039	YESphlox-EGTA5	1.00423	0.00608823	1.00643	0.00924995	1.0036	0.00519023	1.00616	0.008856	15	0.315335	0.899434	0.0460306	0.0130986	FALSE
1039	YESphlox-EtOH0.1	1.00956	0.0137231	1.01177	0.0168848	1.00346	0.00498099	1.00601	0.00864675	36	0.250138	0.794876	0.0997004	0.047109	FALSE
1039	YESphlox-EtOH10	1.00014	0.000207179	1.00234	0.0033689	1.0058	0.00834201	1.00836	0.0120078	12	0.99157	0.99157	0.00367671	0.0454355	FALSE
1039	YESphlox-Forma2.5	1.01394	0.0199674	1.01616	0.0231291	1.01563	0.0223734	1.01821	0.0260391	19	0.0394762	0.292955	0.533199	0.0259297	FALSE
1039	YESphlox-Gluc0.1stationary7	1.00208	0.00299906	1.00428	0.00616078	0.999115	-0.00127749	1.00166	0.00238827	24	0.653417	0.82962	0.081121	0.0192613	FALSE
1039	YESphlox-Gluc0.5stationary7	1.00361	0.00519657	1.00581	0.00835828	1.0033	0.00474605	1.00585	0.00841181	48	0.238686	0.396641	0.401603	0.0130674	FALSE
1039	YESphlox-Gluc1stationary7	1.00098	0.0014151	1.00318	0.00457682	0.997462	-0.00366576	1	0	36	0.819912	0.898372	0.0465437	0.0213937	FALSE
1039	YESphlox-Glycerol2	1.02499	0.0356095	1.02724	0.0387712	1.01108	0.0158928	1.01365	0.0195585	13	0.169515	0.644624	0.190694	0.0613182	FALSE
1039	YESphlox-Glycerol2MMS0.0075	1.0159	0.0227635	1.01813	0.0259252	0.995598	-0.0063644	0.998131	-0.00269864	15	0.596037	0.79939	0.0972411	0.113448	FALSE
1039	YESphlox-Glycerol3	1.01239	0.0177686	1.01461	0.0209304	1.00647	0.00930144	1.00903	0.0129672	13	0.0214706	0.484834	0.314407	0.0157348	FALSE
1039	YESphlox-Glycerol3MMS0.005	0.990002	-0.0144967	0.992174	-0.011335	1.00112	0.00162084	1.00367	0.0052866	13	0.4532	0.672712	0.172171	0.0458909	FALSE
1039	YESphlox-HP10	1.0371	0.0525489	1.03937	0.0557106	1.00939	0.0134834	1.01196	0.0171491	40	0.147402	0.638918	0.194555	0.158397	FALSE
1039	YESphlox-HP15	0.946349	-0.0795555	0.948425	-0.0763938	0.94243	-0.0855421	0.944828	-0.0818763	12	0.27784	0.68856	0.162058	0.162979	FALSE
1039	YESphlox-HP2	1.00821	0.0117935	1.01042	0.0149552	1.00494	0.00711101	1.0075	0.0107768	42	0.0640672	0.478818	0.319829	0.0237176	FALSE
1039	YESphlox-HP4	1	6.00862e-06	1.0022	0.00316773	0.998128	-0.00270379	1.00067	0.000961967	69	0.999404	0.999404	0.000258984	0.0417321	FALSE
1039	YESphlox-HP6	0.99663	-0.00487063	0.998816	-0.00170891	0.997462	-0.00366576	1	0	64	0.844727	0.908801	0.0415313	0.136067	FALSE
1039	YESphlox-HP8	0.987215	-0.0185632	0.989381	-0.0154015	0.994717	-0.00764192	0.997248	-0.00397616	44	0.538702	0.789441	0.102681	0.136232	FALSE
1039	YESphlox-HU8	1.00742	0.0106618	1.00963	0.0138235	1.00302	0.00435182	1.00557	0.00801758	13	0.261584	0.473342	0.324825	0.0213438	FALSE
1039	YESphlox-HU8MMS0.075	0.998689	-0.00189224	1.00088	0.00126948	1.00456	0.00656744	1.00712	0.0102332	13	0.903831	0.968538	0.0138834	0.0374659	FALSE
1039	YESphlox-KCl0.5	0.997209	-0.00403272	0.999396	-0.000871006	1.00123	0.00177931	1.00378	0.00544507	15	0.627078	0.831244	0.0802717	0.0198869	FALSE
1039	YESphlox-KCl0.5SDS0.004	1.0233	0.0332235	1.02554	0.0363853	1.00747	0.0107402	1.01004	0.014406	15	0.0236405	0.183178	0.737126	0.0349484	FALSE
1039	YESphlox-KCl1	0.977266	-0.0331772	0.97941	-0.0300154	0.996555	-0.004978	0.999091	-0.00131224	15	0.225055	0.513125	0.289777	0.0690098	FALSE
1039	YESphlox-LiCl4	1.00105	0.00151427	1.00325	0.00467599	0.997462	-0.00366576	1	0	15	0.835664	0.944443	0.0248244	0.0170422	FALSE
1039	YESphlox-LiCl6	0.995263	-0.00685096	0.997446	-0.00368924	0.99652	-0.00502886	0.999056	-0.0013631	15	0.530019	0.736856	0.132618	0.0271384	FALSE
1039	YESphlox-MMS0.005	0.988508	-0.0166749	0.990677	-0.0135132	0.995159	-0.00700144	0.997691	-0.00333568	12	0.368821	0.627546	0.202355	0.0418841	FALSE
1039	YESphlox-MMS0.075	0.997153	-0.00411267	0.999341	-0.000950954	0.997462	-0.00366576	1	0	27	0.90088	0.925228	0.0337512	0.117222	FALSE
1039	YESphlox-NaCl150	0.998118	-0.00271723	1.00031	0.000444485	0.999936	-9.16676e-05	1.00248	0.00357409	14	0.645653	0.877703	0.0566524	0.0122252	FALSE
1039	YESphlox-NaCl150MMS0.005	0.986805	-0.0191636	0.98897	-0.0160019	0.996001	-0.00578122	0.998535	-0.00211546	12	0.177976	0.570653	0.243628	0.0310119	FALSE
1039	YESphlox-Ovana0.5	1.00782	0.0112425	1.01003	0.0144042	1.00763	0.0109695	1.0102	0.0146353	15	0.040549	0.308172	0.511206	0.0109056	FALSE
1039	YESphlox-Ovana1	1.00834	0.011982	1.01055	0.0151438	1.00344	0.00495459	1.00599	0.00862035	15	0.119061	0.468032	0.329724	0.0176718	FALSE
1039	YESphlox-Ovana4	1.02494	0.0355443	1.02719	0.038706	1.04271	0.0603398	1.04536	0.0640056	15	0.191517	0.851387	0.0698728	0.0700483	FALSE
1039	YESphlox-Phloxine2	1.00218	0.00314807	1.00438	0.00630979	1.00107	0.0015379	1.00361	0.00520366	15	0.746462	0.93392	0.0296905	0.0240894	FALSE
1039	YESphlox-Phloxine2HP10	1.03759	0.0532304	1.03986	0.0563921	1.05088	0.0715995	1.05355	0.0752653	15	0.174765	0.433956	0.362554	0.101711	FALSE
1039	YESphlox-Phloxine2HP15	0.990211	-0.0141927	0.992383	-0.011031	0.997462	-0.00366576	1	0	13	0.808091	0.900425	0.0455524	0.142214	FALSE
1039	YESphlox-SDS0.004	1.00744	0.0106981	1.00965	0.0138599	1.00839	0.0120562	1.01096	0.015722	15	0.177402	0.631995	0.199286	0.0185088	FALSE
1039	YESphlox-TBH1	1.00755	0.0108466	1.00976	0.0140083	1.00355	0.00510646	1.0061	0.00877222	15	0.106909	0.270931	0.567142	0.0148749	FALSE
1039	YESphlox-TBH1.5	1.14939	0.200869	1.15191	0.204031	1.07787	0.108177	1.08061	0.111843	7	0.0351236	0.354429	0.450471	0.146204	FALSE
1039	YESphlox-TSA1000	1.00203	0.00292549	1.00423	0.00608721	1.00448	0.00645581	1.00704	0.0101216	19	0.741639	0.873997	0.0584901	0.0244375	FALSE
1039	YESphlox-TSA500	1.00233	0.00335948	1.00453	0.0065212	1.00363	0.00522633	1.00618	0.00889209	19	0.688247	0.919139	0.0366186	0.0227978	FALSE
1039	YESphlox-TeaTree1	1.00368	0.00530077	1.00588	0.00846249	1.00496	0.00714411	1.00752	0.0108099	15	0.560822	0.789305	0.102755	0.0222617	FALSE
1039	YESphlox-TeaTree10	0.993634	-0.00921301	0.995814	-0.00605129	0.996019	-0.00575552	0.998553	-0.00208976	15	0.370417	0.775258	0.110554	0.0252254	FALSE
1039	YESphlox-TeaTree100	1.00843	0.012108	1.01064	0.0152697	1.00365	0.00525981	1.00621	0.00892557	13	0.22885	0.81954	0.0864297	0.0227183	FALSE
1039	YESphlox-Temp25	1.01281	0.0183581	1.01503	0.0215198	1.01092	0.0156696	1.01349	0.0193354	19	0.120554	0.64208	0.192411	0.0329941	FALSE
1039	YESphlox-Temp25Gluc0.1	0.994277	-0.00828024	0.996458	-0.00511852	0.996176	-0.00552729	0.998711	-0.00186153	23	0.315721	0.51705	0.286467	0.024396	FALSE
1039	YESphlox-Temp25Gluc0.5	1.00101	0.00145254	1.0032	0.00461426	0.997462	-0.00366576	1	0	24	0.827093	0.916289	0.0379675	0.0191557	FALSE
1039	YESphlox-Temp25Gluc1	1.00464	0.00667997	1.00685	0.00984169	1.00425	0.00612093	1.00681	0.00978669	38	0.461649	0.611377	0.213691	0.0356805	FALSE
1039	YESphlox-Temp25Gluc3	1.00692	0.00995411	1.00913	0.0131158	1.00375	0.00540409	1.00631	0.00906985	19	0.270148	0.88803	0.0515721	0.0246763	FALSE
1039	YESphlox-Tuni20	0.997127	-0.0041505	0.999315	-0.000988785	1.00731	0.0105117	1.00988	0.0141774	7	0.944485	0.981455	0.00812966	0.104761	FALSE
1039	YESphlox-Tuni40	1.00211	0.00304744	1.00431	0.00620916	1.01456	0.0208601	1.01715	0.0245259	16	0.926484	0.969101	0.0136311	0.0898575	FALSE
1039	YESphlox-Tuni60	0.996715	-0.00474692	0.998902	-0.00158521	1.00138	0.00199219	1.00393	0.00565795	10	0.907632	0.977931	0.00969185	0.086942	FALSE
1039	YESphlox-Tuni80	0.993191	-0.00985619	0.99537	-0.00669447	0.98794	-0.0175048	0.990453	-0.013839	15	0.621145	0.880822	0.0551119	0.051524	FALSE
1039	YESphlox-VPA10	1.03108	0.0441563	1.03334	0.047318	1.03399	0.0482259	1.03662	0.0518916	15	5.24983e-05	0.00367488	2.43476	0.0215526	FALSE
1039	YESphlox-VPA8	1.00657	0.00944131	1.00877	0.012603	1.00081	0.00116378	1.00335	0.00482954	16	0.611194	0.890218	0.0505037	0.049845	FALSE
1039	YESphlox-Xylose2	1.02517	0.0358579	1.02742	0.0390197	1.01232	0.0176724	1.0149	0.0213382	13	0.0464896	0.407678	0.389683	0.0404534	FALSE
1039	Yesphlox-Caffeine10	1.00139	0.00200883	1.00359	0.00517055	0.997462	-0.00366576	1	0	29	0.93956	0.981011	0.00832616	0.0974615	FALSE
1039	Yesphlox-DMSO	0.997853	-0.00310015	1.00004	6.15631e-05	0.996322	-0.00531564	0.998857	-0.00164988	36	0.859851	0.997352	0.00115156	0.071153	FALSE
1039	Yesphlox-Gal2	0.998723	-0.00184355	1.00091	0.00131817	1.00401	0.00578082	1.00657	0.00944658	36	0.916924	0.96942	0.0134881	0.0716827	FALSE
1039	Yesphlox-Rapa1	0.998528	-0.00212536	1.00072	0.00103636	1.00689	0.00991024	1.00945	0.013576	34	0.870128	0.962534	0.0165839	0.0503385	FALSE
1039	Yesphlox-Rapa100	0.994234	-0.00834208	0.996416	-0.00518036	0.997462	-0.00366576	1	0	36	0.461389	0.718054	0.143843	0.0443449	FALSE
1039	Yesphlox-Sorb1.2	1.01439	0.0206132	1.01662	0.0237749	1.00768	0.0110428	1.01025	0.0147086	34	0.204873	0.855829	0.0676129	0.0636044	FALSE
1039	Yesphlox-Torin5	1.00016	0.000236845	1.00236	0.00339856	0.99716	-0.00410362	0.999697	-0.000437859	36	0.992007	0.992007	0.00348507	0.0968076	FALSE
1064	EMM-3AT4	0.985955	-0.0204057	1.00864	0.0124056	0.986148	-0.0201237	1.00845	0.0121394	18	0.410079	0.77381	0.111366	0.0329045	FALSE
1064	EMM-3AT6	0.985468	-0.0211183	1.00814	0.0116929	0.980976	-0.0277097	1.00316	0.0045534	18	0.416795	0.819217	0.0866011	0.0404122	FALSE
1064	EMM-Bleo200	0.981025	-0.0276386	1.00359	0.00517273	0.981616	-0.0267701	1.00381	0.00549303	18	0.235124	0.462141	0.335226	0.0199845	FALSE
1064	EMM-Canav60	1.03192	0.0453356	1.05566	0.0781468	1.01811	0.0258888	1.04113	0.0581519	18	0.125076	0.677793	0.168903	0.0599768	FALSE
1064	EMM-Cys	0.996956	-0.00439825	1.01989	0.028413	0.992946	-0.0102136	1.0154	0.0220495	36	0.867372	0.924116	0.0342737	0.0614486	FALSE
1064	EMM-Met	0.977474	-0.0328698	0.999959	-5.85159e-05	0.99131	-0.012592	1.01373	0.019671	36	0.508785	0.834021	0.0788232	0.185798	FALSE
1064	EMMphlox-Act0.1	0.996362	-0.00525758	1.02497	0.0355795	0.995123	-0.00705383	1.02273	0.0324228	24	0.619784	0.898054	0.0466976	0.0316697	FALSE
1064	EMMphlox-Act1	0.999743	-0.000371211	1.02845	0.0404659	1.00207	0.00298359	1.02987	0.0424602	24	0.973655	0.997491	0.00109116	0.0343482	FALSE
1064	EMMphlox-Act2	0.991763	-0.0119331	1.02024	0.028904	0.987147	-0.0186625	1.01453	0.0208141	24	0.589357	0.90966	0.041121	0.0736761	FALSE
1064	EMMphlox-Cana75	0.995069	-0.00713191	1.02364	0.0337052	0.997525	-0.00357535	1.0252	0.0359013	36	0.27934	0.574874	0.240428	0.0164686	FALSE
1064	EMMphlox-EtOH0.1	1.00436	0.00627915	1.0332	0.0471162	1.00359	0.00516943	1.03143	0.0446461	24	0.654039	0.931713	0.0307178	0.0449326	FALSE
1064	YES-Bleo200	1.00795	0.0114233	1.02685	0.0382255	1.00133	0.0019107	1.016	0.0229001	18	0.341378	0.734285	0.134136	0.0341248	FALSE
1064	YES-Bleo300	0.985561	-0.0209834	1.00404	0.00581885	0.98628	-0.0199314	1.00073	0.00105797	6	0.0670648	0.927189	0.0328319	0.0154102	FALSE
1064	YES-Bleo600	1.00082	0.00118008	1.01959	0.0279823	1.00615	0.00884312	1.02089	0.0298325	12	0.896964	0.952483	0.0211428	0.0207021	FALSE
1064	YES-Bortezomib100	0.996197	-0.00549769	1.01488	0.0213045	0.993761	-0.00902988	1.00832	0.0119595	18	0.561969	0.825609	0.0832256	0.0264973	FALSE
1064	YES-Bortezomib200	0.984827	-0.0220578	1.00329	0.00474444	0.982282	-0.0257911	0.996677	-0.00480172	18	0.0694523	0.252283	0.598113	0.0329984	FALSE
1064	YES-Bref60	1.15308	0.205489	1.1747	0.232291	0.99354	-0.0093494	1.0081	0.01164	17	0.14451	0.329483	0.482166	0.419028	FALSE
1064	YES-Calco10KCl0.5	0.966542	-0.0490957	0.984666	-0.0222934	0.99485	-0.00744911	1.00943	0.0135403	18	0.256651	0.574873	0.240428	0.122932	FALSE
1064	YES-Calco2	1.00632	0.00908224	1.02519	0.0358845	1.01264	0.0181148	1.02748	0.0391042	18	0.371008	0.755266	0.1219	0.0285338	FALSE
1064	YES-Calco4KCl0.5	0.985598	-0.0209293	1.00408	0.00587291	0.989126	-0.0157735	1.00362	0.00521589	18	0.145208	0.551789	0.258227	0.0400067	FALSE
1064	YES-Cana120	1.00541	0.00779089	1.02427	0.0345931	1.00578	0.00830839	1.02052	0.0292978	17	0.334679	0.679356	0.167902	0.0214291	FALSE
1064	YES-Cana60	1.01339	0.0191923	1.03239	0.0459946	1.01746	0.0249655	1.03237	0.0459549	18	0.047049	0.415513	0.381415	0.0260143	FALSE
1064	YES-CoCl0.25	1.01143	0.0163978	1.0304	0.0432	1.01165	0.0167044	1.02647	0.0376938	18	0.0718203	0.423148	0.373508	0.0245934	FALSE
1064	YES-CoCl5	0.973559	-0.0386604	0.991814	-0.0118581	0.986055	-0.0202607	1.00051	0.000728712	18	0.140014	0.37586	0.424974	0.0734071	FALSE
1064	YES-Cycloh100	0.983409	-0.0241366	1.00185	0.0026656	0.986167	-0.0200962	1.00062	0.000893217	18	0.0123071	0.280602	0.551909	0.0247458	FALSE
1064	YES-Cycloh200	0.989739	-0.0148794	1.0083	0.0119228	0.992614	-0.010695	1.00716	0.0102944	18	0.037977	0.345423	0.461649	0.0182906	FALSE
1064	YES-Cycloh400	1.00261	0.00375552	1.02141	0.0305578	0.993943	-0.00876538	1.00851	0.012224	18	0.688081	0.862773	0.0641034	0.0262655	FALSE
1064	YES-Cycloh600	0.994666	-0.00771637	1.01332	0.0190859	0.998801	-0.00173013	1.01344	0.0192593	18	0.388753	0.962292	0.016693	0.0247155	FALSE
1064	YES-Dhcumarin100	0.994904	-0.00737042	1.01356	0.0194318	0.996932	-0.00443262	1.01154	0.0165568	18	0.428404	0.739971	0.130785	0.0258445	FALSE
1064	YES-Dhcumarin200	0.995314	-0.00677686	1.01398	0.0200254	0.991124	-0.0128623	1.00565	0.00812712	16	0.531989	0.774335	0.111071	0.0288024	FALSE
1064	YES-Dhcumarin50	0.993415	-0.00953137	1.01204	0.0172709	1.00081	0.00117113	1.01548	0.0221605	18	0.134613	0.442437	0.354149	0.016285	FALSE
1064	YES-EDTA0.1	1.00525	0.00756041	1.0241	0.0343627	1.00701	0.0100736	1.02176	0.0310629	18	0.411198	0.782359	0.106594	0.0256462	FALSE
1064	YES-EDTA0.3	1.00741	0.0106515	1.0263	0.0374538	1.00593	0.00852606	1.02067	0.0295154	18	0.431596	0.780984	0.107358	0.0388826	FALSE
1064	YES-EDTA0.6	1.01138	0.0163223	1.03034	0.0431245	1.00602	0.00866545	1.02077	0.0296548	18	0.109615	0.678455	0.168479	0.0280758	FALSE
1064	YES-EtOH5	0.99734	-0.00384301	1.01604	0.0229592	0.986517	-0.0195843	1.00097	0.00140504	18	0.859574	0.971301	0.0126463	0.063452	FALSE
1064	YES-Forma2	0.997615	-0.00344474	1.01632	0.0233575	0.994418	-0.00807555	1.00899	0.0129138	18	0.703167	0.923751	0.034445	0.0252247	FALSE
1064	YES-Forma3	0.980549	-0.0283389	0.998935	-0.00153669	0.988231	-0.0170794	1.00271	0.00390994	18	0.00254057	0.0724062	1.14022	0.0231219	FALSE
1064	YES-HU30	0.995326	-0.0067589	1.01399	0.0200433	0.997922	-0.00300141	1.01255	0.017988	18	0.378743	0.588729	0.230085	0.0207609	FALSE
1064	YES-HU45	0.982221	-0.0258798	1.00064	0.000922486	0.984512	-0.0225196	0.99894	-0.00153026	18	0.0531819	0.466364	0.331275	0.0362392	FALSE
1064	YES-KCl0.5SDS0.01	1.0025	0.00360173	1.0213	0.030404	1.00028	0.000406107	1.01494	0.0213955	18	0.816944	0.911522	0.040233	0.0451723	FALSE
1064	YES-KCl1SDS0.01	0.979782	-0.0294667	0.998155	-0.00266445	1.01408	0.0201775	1.02895	0.0411668	18	0.472947	0.728594	0.137514	0.11876	FALSE
1064	YES-Ovana3	0.968942	-0.0455172	0.987112	-0.018715	0.997928	-0.00299222	1.01255	0.0179972	15	0.234186	0.627738	0.202222	0.0982993	FALSE
1064	YES-Ovana6	0.999808	-0.000276493	1.01856	0.0265257	1.00616	0.00885592	1.0209	0.0298453	16	0.993685	0.993685	0.00275116	0.0967125	FALSE
1064	YES-SDS0.01	1.01308	0.0187534	1.03208	0.0455557	1.01953	0.0279071	1.03447	0.0488965	22	0.195698	0.544137	0.264292	0.0459052	FALSE
1064	YES-SDS0.02	1.0576	0.0807967	1.07743	0.107599	1.03622	0.0513368	1.05141	0.0723262	14	0.0152913	0.0968447	1.01392	0.0785158	FALSE
1064	YES-TBH15	0.98478	-0.0221267	1.00325	0.00467557	0.959498	-0.0596486	0.973559	-0.0386593	6	0.852405	0.918611	0.0368685	0.193829	FALSE
1064	YES-UV1000	0.998108	-0.00273195	1.01682	0.0240703	0.996408	-0.00519141	1.01101	0.015798	18	0.904436	0.966066	0.0149934	0.0665642	FALSE
1064	YES-UV10m	1.01675	0.0239662	1.03582	0.0507684	1.02078	0.0296742	1.03574	0.0506636	17	0.203683	0.633207	0.198454	0.0525241	FALSE
1064	YES-UV2000	0.997583	-0.00349081	1.01629	0.0233114	1.00196	0.00282139	1.01664	0.0238108	18	0.698197	0.862836	0.0640717	0.0251059	FALSE
1064	YES-UV20m	1.00839	0.0120521	1.0273	0.0388544	1.00826	0.0118633	1.02303	0.0328527	18	0.192846	0.52344	0.281133	0.0255089	FALSE
1064	YES-UV3000	1.00667	0.00959701	1.02555	0.0363992	1.0018	0.00259458	1.01648	0.023584	17	0.383245	0.926811	0.0330089	0.0302278	FALSE
1064	YES-UV4000	0.998394	-0.00231894	1.01712	0.0244833	0.987211	-0.01857	1.00168	0.00241935	14	0.873658	0.967876	0.0141802	0.0370188	FALSE
1064	YES-UV5m	1.00709	0.0101886	1.02597	0.0369909	1.00084	0.00121449	1.01551	0.0222039	16	0.595278	0.859009	0.0660025	0.0526277	FALSE
1064	YES-UV6000	1.00468	0.00672949	1.02351	0.0335317	1.0051	0.00733972	1.01983	0.0283291	18	0.411165	0.732387	0.135259	0.0225002	FALSE
1064	YES-UV9000	0.988864	-0.0161561	1.00741	0.0106461	0.997616	-0.00344294	1.01224	0.0175464	18	0.0266482	0.215057	0.667447	0.0184971	FALSE
1064	YES-VPA5	1.01466	0.0209958	1.03369	0.047798	1.00163	0.00234327	1.0163	0.0233326	17	0.250111	0.524503	0.280252	0.0510016	FALSE
1064	YESphlox-Act0.1	1.01268	0.0181839	1.02826	0.0402045	1.00566	0.0081422	1.01856	0.0265323	24	0.361712	0.861122	0.0649351	0.0672969	FALSE
1064	YESphlox-Act1	0.983051	-0.0246621	0.998171	-0.00264144	0.98963	-0.0150393	1.00233	0.00335071	24	0.172645	0.913949	0.0390778	0.0593622	FALSE
1064	YESphlox-Act2	0.999796	-0.000293875	1.01517	0.0217267	0.996761	-0.00468009	1.00955	0.01371	24	0.984838	0.992839	0.00312106	0.0520648	FALSE
1064	YESphlox-stationary7	1.00094	0.00135553	1.01634	0.0233761	0.999671	-0.00047523	1.0125	0.0179148	36	0.81692	0.909717	0.0410939	0.0222617	FALSE
1064	YESphlox-Benza12	1.00048	0.000685735	1.01586	0.0227063	1.00042	0.000605077	1.01325	0.0189951	18	0.918104	0.961871	0.0168832	0.01825	FALSE
1064	YESphlox-Benza4	0.992148	-0.011373	1.00741	0.0106476	0.994943	-0.00731404	1.00771	0.011076	18	0.259372	0.673503	0.17166	0.0281527	FALSE
1064	YESphlox-Benza8	0.999337	-0.000956994	1.01471	0.0210636	1.00367	0.0052876	1.01655	0.0236777	18	0.825647	0.918102	0.0371093	0.0105235	FALSE
1064	YESphlox-Bort500	0.970175	-0.0436829	0.985097	-0.0216623	0.976771	-0.0339084	0.989301	-0.0155183	18	0.00323316	0.0474648	1.32363	0.0372378	FALSE
1064	YESphlox-CdCl1	1.02886	0.0410508	1.04469	0.0630714	1.01495	0.0214035	1.02797	0.0397936	10	0.232886	0.835165	0.0782275	0.0723089	FALSE
1064	YESphlox-Diamide2	1.00675	0.00971209	1.02224	0.0317327	1.008	0.0114912	1.02093	0.0298813	18	0.326548	0.743589	0.128667	0.0279433	FALSE
1064	YESphlox-Diamide3	1.01636	0.0234164	1.032	0.045437	1.02692	0.038326	1.0401	0.056716	18	0.0735379	0.335333	0.474524	0.0364018	FALSE
1064	YESphlox-Diamide3.5	1.02359	0.0336428	1.03934	0.0556634	1.02378	0.0339114	1.03692	0.0523015	18	0.0389664	0.193138	0.714133	0.0450227	FALSE
1064	YESphlox-EDTA4	0.986628	-0.0194217	1.0018	0.00259889	0.977878	-0.0322738	0.990423	-0.0138838	18	0.337795	0.761284	0.118453	0.0579832	FALSE
1064	YESphlox-EGTA1	1.00713	0.0102549	1.02262	0.0322755	1.00883	0.0126773	1.02177	0.0310673	18	0.185151	0.811719	0.0905944	0.0211824	FALSE
1064	YESphlox-EGTA10	0.982126	-0.0260199	0.997232	-0.00399932	0.946166	-0.079835	0.958304	-0.061445	18	0.612448	0.788943	0.102954	0.14903	FALSE
1064	YESphlox-EGTA15	0.999345	-0.000944928	1.01472	0.0210757	1.01501	0.0214888	1.02803	0.0398789	6	0.988917	0.998014	0.000863211	0.111484	FALSE
1064	YESphlox-EGTA5	0.997612	-0.00344858	1.01296	0.018572	0.999184	-0.00117819	1.012	0.0172119	18	0.498121	0.960472	0.0175152	0.0130301	FALSE
1064	YESphlox-EtOH0.1	1.01556	0.0222754	1.03118	0.044296	0.995649	-0.00629078	1.00842	0.0120993	24	0.222345	0.794876	0.0997004	0.0611779	FALSE
1064	YESphlox-EtOH10	0.995974	-0.00581943	1.01129	0.0162012	1.00275	0.00396312	1.01561	0.0223532	17	0.65083	0.956864	0.0191498	0.0358733	FALSE
1064	YESphlox-Forma2.5	0.998343	-0.00239265	1.0137	0.019628	0.99612	-0.00560801	1.0089	0.012782	18	0.855945	0.965087	0.0154335	0.0380549	FALSE
1064	YESphlox-Gluc0.1stationary7	0.990801	-0.0133331	1.00604	0.00868755	0.99251	-0.0108468	1.00524	0.00754322	36	0.0764186	0.221418	0.654787	0.0290595	FALSE
1064	YESphlox-Gluc0.5stationary7	0.988002	-0.0174142	1.0032	0.00460637	0.991215	-0.0127298	1.00393	0.00566023	72	1.59821e-05	0.000150498	3.82247	0.01798	FALSE
1064	YESphlox-Gluc1stationary7	1.0026	0.0037419	1.01802	0.0257625	0.997801	-0.00317646	1.0106	0.0152136	35	0.678191	0.844765	0.0732643	0.0358586	FALSE
1064	YESphlox-Glycerol2	0.998194	-0.00260808	1.01355	0.0194125	1.0013	0.00187852	1.01415	0.0202686	18	0.720476	0.910604	0.0406705	0.0201419	FALSE
1064	YESphlox-Glycerol2MMS0.0075	0.987006	-0.0188693	1.00219	0.00315132	0.999623	-0.000544559	1.01245	0.0178455	18	0.230163	0.468546	0.329248	0.0444497	FALSE
1064	YESphlox-Glycerol3	1.00122	0.00175569	1.01662	0.0237763	1.00118	0.00169677	1.01402	0.0200868	18	0.834508	0.960949	0.0172996	0.0236534	FALSE
1064	YESphlox-Glycerol3MMS0.005	0.996936	-0.00442696	1.01227	0.0175936	0.997333	-0.00385322	1.01013	0.0145368	18	0.590478	0.764938	0.116374	0.0229769	FALSE
1064	YESphlox-HP10	1.00224	0.00323159	1.01766	0.0252522	0.998752	-0.00180136	1.01156	0.0165887	28	0.806928	0.898422	0.0465194	0.0479675	FALSE
1064	YESphlox-HP15	1.08642	0.119578	1.10313	0.141599	1.10286	0.141249	1.11701	0.15964	15	0.0115233	0.203555	0.691318	0.116896	FALSE
1064	YESphlox-HP2	1.00732	0.0105208	1.02281	0.0325414	1.00365	0.00525742	1.01653	0.0236475	35	0.275908	0.725536	0.139341	0.0384182	FALSE
1064	YESphlox-HP4	1.00267	0.00384139	1.01809	0.025862	1.00745	0.0107131	1.02038	0.0291031	54	0.577537	0.779387	0.108247	0.0331436	FALSE
1064	YESphlox-HP6	0.997954	-0.00295426	1.0133	0.0190663	1.00446	0.00641423	1.01734	0.0248043	54	0.842104	0.908801	0.0415313	0.0751778	FALSE
1064	YESphlox-HP8	1.00707	0.0101694	1.02256	0.03219	1.00488	0.00702078	1.01777	0.0254108	39	0.416418	0.758093	0.120277	0.0535374	FALSE
1064	YESphlox-HU8	1.00114	0.00163709	1.01653	0.0236577	1.00085	0.00122489	1.01369	0.0196149	18	0.829111	0.917509	0.0373896	0.0211194	FALSE
1064	YESphlox-HU8MMS0.075	0.986612	-0.0194455	1.00179	0.00257508	0.983868	-0.023463	0.99649	-0.00507292	18	0.239272	0.798726	0.097602	0.0467887	FALSE
1064	YESphlox-KCl0.5	0.989095	-0.0158185	1.00431	0.00620209	0.995238	-0.00688673	1.00801	0.0115033	18	0.25488	0.61822	0.208857	0.0392643	FALSE
1064	YESphlox-KCl0.5SDS0.004	0.976633	-0.034112	0.991654	-0.0120914	1.0007	0.00100997	1.01354	0.0194	18	0.0932933	0.353754	0.451299	0.0562425	FALSE
1064	YESphlox-KCl1	0.973525	-0.0387104	0.988498	-0.0166898	1.01161	0.0166496	1.02458	0.0350397	18	0.256019	0.534026	0.272437	0.0967848	FALSE
1064	YESphlox-LiCl4	1.0038	0.00547276	1.01924	0.0274934	1.00382	0.00550773	1.0167	0.0238978	18	0.492218	0.916684	0.0377804	0.0222156	FALSE
1064	YESphlox-LiCl6	0.98812	-0.0172422	1.00332	0.00477845	0.967333	-0.047915	0.979743	-0.029525	18	0.423034	0.636318	0.196326	0.0619404	FALSE
1064	YESphlox-MMS0.005	0.996594	-0.00492175	1.01192	0.0170989	0.99153	-0.0122718	1.00425	0.00611824	18	0.530747	0.756314	0.121298	0.0217906	FALSE
1064	YESphlox-MMS0.075	0.988022	-0.0173855	1.00322	0.00463511	0.98952	-0.0151996	1.00221	0.00319043	36	0.0427496	0.118865	0.924947	0.0333154	FALSE
1064	YESphlox-NaCl150	1.00615	0.00884266	1.02162	0.0308633	1.01269	0.0181973	1.02568	0.0365874	18	0.328518	0.877703	0.0566524	0.0253817	FALSE
1064	YESphlox-NaCl150MMS0.005	0.995757	-0.0061343	1.01107	0.0158863	0.998955	-0.00150866	1.01177	0.0168814	18	0.423626	0.754584	0.122293	0.021142	FALSE
1064	YESphlox-Ovana0.5	1.00875	0.0125617	1.02426	0.0345823	0.999721	-0.000402919	1.01255	0.0179871	18	0.375898	0.845635	0.0728168	0.0408311	FALSE
1064	YESphlox-Ovana1	1.00861	0.0123636	1.02412	0.0343842	0.996607	-0.00490374	1.00939	0.0134863	18	0.424686	0.769228	0.113945	0.0447746	FALSE
1064	YESphlox-Ovana4	0.991613	-0.0121509	1.00686	0.00986967	0.999088	-0.00131576	1.01191	0.0170743	13	0.743188	0.919918	0.036251	0.0913774	FALSE
1064	YESphlox-Phloxine2	1.00149	0.00215171	1.0169	0.0241723	1.00382	0.00550245	1.0167	0.0238925	18	0.712325	0.933392	0.0299359	0.0155652	FALSE
1064	YESphlox-Phloxine2HP10	1.03965	0.0560931	1.05564	0.0781137	1.01071	0.0153703	1.02368	0.0337604	18	0.0511989	0.300976	0.521467	0.0811867	FALSE
1064	YESphlox-Phloxine2HP15	1.07938	0.110202	1.09598	0.132223	1.05661	0.0794456	1.07017	0.0978357	17	0.0950429	0.504613	0.297041	0.187196	FALSE
1064	YESphlox-SDS0.004	1.00634	0.00911361	1.02182	0.0311342	1.00618	0.00888286	1.01908	0.0272729	18	0.287646	0.728702	0.13745	0.023878	FALSE
1064	YESphlox-TBH1	1.00637	0.00916214	1.02185	0.0311827	1.00589	0.00847856	1.0188	0.0268686	18	0.2743	0.466719	0.330944	0.0232825	FALSE
1064	YESphlox-TBH1.5	1.10504	0.144097	1.12203	0.166118	1.00842	0.0120967	1.02136	0.0304867	7	0.143698	0.475684	0.322681	0.167808	FALSE
1064	YESphlox-TSA1000	0.991559	-0.01223	1.00681	0.00979057	0.994418	-0.00807592	1.00717	0.0103141	18	0.0999365	0.476039	0.322357	0.0198328	FALSE
1064	YESphlox-TSA500	0.996384	-0.0052257	1.01171	0.0167949	0.999443	-0.000803405	1.01226	0.0175867	18	0.37976	0.732546	0.135165	0.015763	FALSE
1064	YESphlox-TeaTree1	1.01507	0.0215763	1.03068	0.043597	1.0112	0.0160743	1.02418	0.0344643	18	0.0846978	0.402315	0.395434	0.0348573	FALSE
1064	YESphlox-TeaTree10	1.01083	0.0155371	1.02637	0.0375577	0.999929	-0.00010261	1.01276	0.0182874	18	0.379738	0.775258	0.110554	0.0512423	FALSE
1064	YESphlox-TeaTree100	1.00301	0.00433722	1.01844	0.0263578	1.00316	0.00455148	1.01603	0.0229415	18	0.619173	0.951799	0.0214546	0.0246002	FALSE
1064	YESphlox-Temp25	1.00308	0.0044357	1.01851	0.0264563	0.995746	-0.0061505	1.00852	0.0122396	18	0.697645	0.913227	0.0394213	0.0327952	FALSE
1064	YESphlox-Temp25Gluc0.1	0.997763	-0.00323136	1.01311	0.0187892	0.990428	-0.0138755	1.00313	0.00451456	35	0.683599	0.772467	0.11212	0.0310686	FALSE
1064	YESphlox-Temp25Gluc0.5	0.993772	-0.00901376	1.00906	0.0130068	0.994307	-0.00823606	1.00706	0.010154	36	0.210621	0.44453	0.352099	0.0279786	FALSE
1064	YESphlox-Temp25Gluc1	1.00472	0.00679589	1.02017	0.0288165	1.01011	0.0145117	1.02307	0.0329018	36	0.299604	0.472708	0.325407	0.0253434	FALSE
1064	YESphlox-Temp25Gluc3	1.00148	0.00213736	1.01689	0.024158	0.993584	-0.00928599	1.00633	0.00910407	18	0.836803	0.96905	0.0136538	0.029674	FALSE
1064	YESphlox-Tuni20	1.01471	0.0210684	1.03032	0.043089	1.01113	0.015963	1.0241	0.034353	10	0.436224	0.839894	0.0757758	0.057756	FALSE
1064	YESphlox-Tuni40	0.992284	-0.0111745	1.00755	0.0108461	1.02151	0.0307088	1.03462	0.0490989	14	0.738504	0.894206	0.0485625	0.0857182	FALSE
1064	YESphlox-Tuni60	0.967546	-0.0475973	0.982428	-0.0255767	0.980688	-0.0281345	0.993268	-0.00974445	12	0.239025	0.897652	0.0468921	0.0915382	FALSE
1064	YESphlox-Tuni80	0.992859	-0.0103399	1.00813	0.0116807	0.988548	-0.016617	1.00123	0.00177309	13	0.599634	0.880822	0.0551119	0.0481238	FALSE
1064	YESphlox-VPA10	1.08098	0.112336	1.0976	0.134357	1.03823	0.0541293	1.05155	0.0725194	14	0.0270667	0.144037	0.841527	0.12344	FALSE
1064	YESphlox-VPA8	1.03703	0.0524557	1.05298	0.0744763	1.03792	0.0536957	1.05124	0.0720857	14	0.11757	0.363047	0.440037	0.0837445	FALSE
1064	YESphlox-Xylose2	0.99073	-0.0134355	1.00597	0.00858512	0.998719	-0.00184926	1.01153	0.0165408	17	0.12116	0.603312	0.219458	0.0228246	FALSE
1064	Yesphlox-Caffeine10	1.05041	0.0709467	1.06656	0.0929673	0.998945	-0.00152332	1.01176	0.0168667	19	0.19955	0.731691	0.135672	0.167367	FALSE
1064	Yesphlox-DMSO	0.995209	-0.00692894	1.01052	0.0150917	0.994671	-0.00770902	1.00743	0.010681	24	0.706174	0.997352	0.00115156	0.0618751	FALSE
1064	Yesphlox-Gal2	1.01749	0.025016	1.03314	0.0470366	1.01466	0.0209963	1.02768	0.0393864	23	0.49647	0.719141	0.143186	0.122902	FALSE
1064	Yesphlox-Rapa1	1.00307	0.00442766	1.0185	0.0264483	1.00433	0.00623339	1.01721	0.0246234	23	0.722022	0.958197	0.018545	0.0407241	FALSE
1064	Yesphlox-Rapa100	1.01359	0.0194691	1.02918	0.0414897	0.994642	-0.00775005	1.0074	0.01064	24	0.411026	0.718054	0.143843	0.0802906	FALSE
1064	Yesphlox-Sorb1.2	1.00727	0.0104457	1.02276	0.0324663	1.01571	0.0224862	1.02874	0.0408762	23	0.573514	0.894193	0.0485689	0.0613903	FALSE
1064	Yesphlox-Torin5	0.98019	-0.0288661	0.995266	-0.00684552	0.967293	-0.0479755	0.979702	-0.0295855	24	0.406531	0.740095	0.130712	0.116251	FALSE
1088	EMM-3AT4	1.01081	0.0155134	1.02136	0.0304862	1.01307	0.0187408	1.02997	0.0426016	11	0.278315	0.742295	0.129424	0.0285273	FALSE
1088	EMM-3AT6	0.99999	-1.38246e-05	1.01042	0.014959	0.995769	-0.00611746	1.01237	0.0177434	12	0.999149	0.999149	0.000369747	0.0267202	FALSE
1088	EMM-Bleo200	1.01117	0.0160271	1.02172	0.031	1.00054	0.000783021	1.01723	0.0246438	12	0.0865025	0.273924	0.562369	0.0155697	FALSE
1088	EMM-Canav60	1.01553	0.022232	1.02612	0.0372049	0.993803	-0.00896847	1.01038	0.0148924	12	0.210681	0.76951	0.113786	0.0384362	FALSE
1088	EMM-Cys	0.983766	-0.0236126	0.994029	-0.00863977	0.989209	-0.015653	1.00571	0.00820779	24	0.214431	0.602375	0.220133	0.0592679	FALSE
1088	EMM-Met	0.99283	-0.0103809	1.00319	0.00459192	0.984059	-0.0231827	1.00047	0.000678128	24	0.388769	0.779826	0.108003	0.0340854	FALSE
1088	EMMphlox-Act0.1	1.01262	0.0180959	1.00925	0.0132776	1.01142	0.0163881	1.01098	0.0157508	16	0.150639	0.608616	0.215657	0.0269793	FALSE
1088	EMMphlox-Act1	0.999594	-0.000586322	0.996261	-0.00540465	0.995346	-0.00673017	0.994906	-0.00736739	16	0.969617	0.997491	0.00109116	0.0364814	FALSE
1088	EMMphlox-Act2	1.00482	0.00693391	1.00147	0.00211559	0.997389	-0.00377191	0.996948	-0.00440913	16	0.771051	0.972997	0.0118884	0.0615505	FALSE
1088	EMMphlox-Cana75	0.997953	-0.00295681	0.994625	-0.00777513	1.0031	0.00446087	1.00265	0.00382365	22	0.77285	0.887932	0.0516204	0.0219153	FALSE
1088	EMMphlox-EtOH0.1	0.99781	-0.00316295	0.994483	-0.00798127	0.98545	-0.0211449	0.985015	-0.0217821	16	0.896849	0.957538	0.018844	0.0630026	FALSE
1088	YES-Bleo200	1.00881	0.0126593	1.0182	0.0260197	1.00456	0.00655919	1.01351	0.0193537	11	0.155203	0.569948	0.244165	0.0186033	FALSE
1088	YES-Bleo300	1.01783	0.0254956	1.0273	0.038856	1.02193	0.0313022	1.03104	0.0440967	4	0.310668	0.927189	0.0328319	0.0295324	FALSE
1088	YES-Bleo600	0.988357	-0.0168962	0.997552	-0.00353583	0.991148	-0.0128276	0.999977	-3.31811e-05	8	0.106376	0.50598	0.295867	0.0176478	FALSE
1088	YES-Bortezomib100	0.998633	-0.00197404	1.00792	0.0113864	1.00801	0.0115032	1.01698	0.0242976	12	0.860076	0.947226	0.0235465	0.0258887	FALSE
1088	YES-Bortezomib200	0.986842	-0.0191085	0.996024	-0.0057481	0.992562	-0.0107714	1.0014	0.0020231	12	0.164512	0.393038	0.405566	0.03048	FALSE
1088	YES-Bref60	1.24088	0.311362	1.25242	0.324722	1.08959	0.123783	1.09929	0.136578	12	0.113901	0.281819	0.550029	0.490379	FALSE
1088	YES-Calco10KCl0.5	1.01762	0.0252012	1.02709	0.0385616	1.00771	0.0110875	1.01669	0.023882	12	0.24418	0.568395	0.24535	0.0498001	FALSE
1088	YES-Calco2	1.01076	0.0154366	1.02016	0.028797	1.01413	0.0202458	1.02317	0.0330402	12	0.161572	0.594167	0.226092	0.0245544	FALSE
1088	YES-Calco4KCl0.5	0.998142	-0.00268276	1.00743	0.0106776	0.996746	-0.00470159	1.00563	0.00809288	12	0.733218	0.892101	0.0495858	0.0177117	FALSE
1088	YES-Cana120	1.00493	0.00709151	1.01428	0.0204519	0.999572	-0.000617606	1.00848	0.0121769	12	0.575199	0.780627	0.107556	0.0293116	FALSE
1088	YES-Cana60	1.01542	0.0220835	1.02487	0.0354439	1.00613	0.00881901	1.01509	0.0216135	12	0.153066	0.473591	0.324596	0.034784	FALSE
1088	YES-CoCl0.25	1.00241	0.00347316	1.01174	0.0168336	1.00462	0.00664394	1.01356	0.0194384	12	0.732687	0.960072	0.017696	0.0233921	FALSE
1088	YES-CoCl5	1.00982	0.0140947	1.01921	0.0274551	0.998164	-0.00265104	1.00706	0.0101434	11	0.357967	0.582975	0.23435	0.0337242	FALSE
1088	YES-Cycloh100	1.00138	0.00198462	1.01069	0.015345	1.0024	0.0034545	1.01133	0.016249	12	0.745507	0.976871	0.0101628	0.013322	FALSE
1088	YES-Cycloh200	0.99885	-0.00166003	1.00814	0.0117004	0.995374	-0.00668922	1.00424	0.00610525	12	0.846835	0.972878	0.0119416	0.0195362	FALSE
1088	YES-Cycloh400	0.999378	-0.000897983	1.00868	0.0124624	0.999963	-5.38851e-05	1.00887	0.0127406	12	0.896521	0.950353	0.0221148	0.0153415	FALSE
1088	YES-Cycloh600	1.00138	0.00199395	1.0107	0.0153543	0.991709	-0.0120114	1.00054	0.000783039	12	0.875696	0.993949	0.00263595	0.0296733	FALSE
1088	YES-Dhcumarin100	1.00156	0.00225202	1.01088	0.0156124	1.00127	0.00182842	1.01019	0.0146229	11	0.743044	0.860682	0.0651571	0.0145638	FALSE
1088	YES-Dhcumarin200	0.981542	-0.0268779	0.990674	-0.0135175	0.988325	-0.0169424	0.997129	-0.00414794	11	0.0179952	0.256432	0.591027	0.0216587	FALSE
1088	YES-Dhcumarin50	0.991035	-0.0129922	1.00026	0.000368201	0.991558	-0.0122312	1.00039	0.000563275	12	0.0812268	0.360314	0.443319	0.0156363	FALSE
1088	YES-EDTA0.1	1.00245	0.00352748	1.01177	0.0168879	1.00336	0.00484328	1.0123	0.0176377	12	0.719999	0.87319	0.0588912	0.0225878	FALSE
1088	YES-EDTA0.3	0.999499	-0.000722376	1.0088	0.012638	0.991032	-0.0129971	0.99986	-0.000202674	12	0.931539	0.963853	0.0159891	0.0190978	FALSE
1088	YES-EDTA0.6	1.00318	0.00457832	1.01251	0.0179387	1.0025	0.00360231	1.01143	0.0163968	12	0.537448	0.853017	0.0690422	0.0165578	FALSE
1088	YES-EtOH5	0.991377	-0.012495	1.0006	0.000865394	1.00188	0.00271283	1.01081	0.0155073	12	0.305457	0.891107	0.0500702	0.0275438	FALSE
1088	YES-Forma2	1.00381	0.00548378	1.01315	0.0188442	1.00163	0.00234574	1.01055	0.0151402	12	0.682853	0.923751	0.034445	0.0312378	FALSE
1088	YES-Forma3	1.01584	0.022668	1.02529	0.0360284	1.0091	0.0130712	1.01809	0.0258657	12	0.237525	0.594961	0.225512	0.0440197	FALSE
1088	YES-HU30	1.0049	0.00704612	1.01425	0.0204065	1.00031	0.000447378	1.00922	0.0132418	11	0.451611	0.635601	0.196815	0.0202686	FALSE
1088	YES-HU45	1.00434	0.00625055	1.01369	0.019611	1.00661	0.0095022	1.01557	0.0222967	12	0.504549	0.869949	0.0605063	0.0213042	FALSE
1088	YES-KCl0.5SDS0.01	0.989995	-0.014507	0.999206	-0.00114659	0.993138	-0.00993387	1.00198	0.00286059	12	0.204521	0.484275	0.314908	0.0254225	FALSE
1088	YES-KCl1SDS0.01	1.00983	0.0141138	1.01923	0.0274742	1.00114	0.00164683	1.01006	0.0144413	12	0.500899	0.732272	0.135328	0.0490828	FALSE
1088	YES-Ovana3	0.993619	-0.00923605	1.00286	0.00412436	1.00367	0.00528206	1.01261	0.0180765	10	0.835925	0.911625	0.0401838	0.0954009	FALSE
1088	YES-Ovana6	0.984305	-0.0228226	0.993463	-0.00946216	0.987678	-0.0178875	0.996476	-0.00509303	10	0.609291	0.758229	0.120199	0.0944795	FALSE
1088	YES-SDS0.01	0.977126	-0.0333835	0.986217	-0.0200231	0.986062	-0.0202491	0.994846	-0.0074546	14	0.0467984	0.444584	0.352046	0.0390209	FALSE
1088	YES-SDS0.02	1.01856	0.0265324	1.02804	0.0398928	1.02109	0.0301047	1.03018	0.0428992	10	0.0586452	0.230536	0.63726	0.027133	FALSE
1088	YES-TBH15	0.98037	-0.0286013	0.989491	-0.0152409	1.07991	0.110907	1.08953	0.123701	6	0.836274	0.918611	0.0368685	0.222898	FALSE
1088	YES-UV1000	0.990724	-0.0134445	0.999942	-8.4116e-05	0.970285	-0.0435189	0.978929	-0.0307245	12	0.748079	0.966066	0.0149934	0.0983115	FALSE
1088	YES-UV10m	0.983543	-0.02394	0.992694	-0.0105796	0.988951	-0.0160291	0.99776	-0.00323466	12	0.484012	0.827932	0.0820054	0.0792539	FALSE
1088	YES-UV2000	1.01954	0.0279254	1.02903	0.0412858	1.01326	0.0189979	1.02228	0.0317924	12	0.123382	0.637223	0.195708	0.0406669	FALSE
1088	YES-UV20m	0.991676	-0.0120592	1.0009	0.00130119	0.991434	-0.0124107	1.00027	0.000383773	12	0.0283306	0.215313	0.66693	0.0107226	FALSE
1088	YES-UV3000	1.00056	0.000804385	1.00987	0.0141648	1.00517	0.00743725	1.01412	0.0202317	12	0.946001	0.990365	0.00420469	0.0275723	FALSE
1088	YES-UV4000	0.993732	-0.00907138	1.00298	0.00428902	0.992083	-0.0114674	1.00092	0.00132707	8	0.256149	0.704757	0.151961	0.0139207	FALSE
1088	YES-UV5m	1.01571	0.0224889	1.02516	0.0358493	1.00504	0.00725039	1.01399	0.0200449	12	0.302248	0.673258	0.171818	0.0504716	FALSE
1088	YES-UV6000	0.998489	-0.00218134	1.00778	0.0111791	0.993593	-0.00927329	1.00244	0.00352118	12	0.756277	0.862156	0.0644144	0.0156201	FALSE
1088	YES-UV9000	0.994276	-0.00828147	1.00353	0.00507893	0.995408	-0.00664009	1.00427	0.00615437	12	0.0510307	0.265934	0.575226	0.0078155	FALSE
1088	YES-VPA5	0.996864	-0.00453159	1.00614	0.00882881	0.99763	-0.00342362	1.00652	0.00937085	12	0.293521	0.525765	0.279208	0.00833743	FALSE
1088	YESphlox-Act0.1	0.996738	-0.00471429	0.997673	-0.00336145	0.984402	-0.0226808	0.985385	-0.0212408	16	0.743855	0.988849	0.00486994	0.0386232	FALSE
1088	YESphlox-Act1	1.00519	0.00747468	1.00614	0.00882752	0.999002	-0.00144005	1	0	16	0.650474	0.924906	0.0339026	0.0444486	FALSE
1088	YESphlox-Act2	0.977149	-0.0333491	0.978066	-0.0319963	0.975957	-0.0351108	0.976931	-0.0336708	16	0.0261903	0.656468	0.182786	0.0366877	FALSE
1088	YESphlox-stationary7	1.00198	0.00285256	1.00292	0.00420539	1.0024	0.00345679	1.0034	0.00489684	22	0.615665	0.889891	0.0506631	0.0162735	FALSE
1088	YESphlox-Benza12	1.00081	0.00116338	1.00175	0.00251621	0.999149	-0.0012288	1.00015	0.000211249	12	0.889404	0.961871	0.0168832	0.0187278	FALSE
1088	YESphlox-Benza4	1.00235	0.00339013	1.00329	0.00474296	0.998352	-0.00237963	0.999349	-0.000939585	12	0.739617	0.860258	0.0653711	0.0231839	FALSE
1088	YESphlox-Benza8	0.996471	-0.00510027	0.997406	-0.00374744	1.0037	0.00532117	1.0047	0.00676122	12	0.640682	0.869498	0.0607317	0.0248052	FALSE
1088	YESphlox-Bort500	1.00231	0.00332957	1.00325	0.00468241	1.00034	0.00048578	1.00134	0.00192583	12	0.860223	0.932894	0.0301676	0.0440431	FALSE
1088	YESphlox-CdCl1	0.951184	-0.0722036	0.952076	-0.0708508	0.978118	-0.031919	0.979095	-0.0304789	7	0.305145	0.835165	0.0782275	0.115261	FALSE
1088	YESphlox-Diamide2	1.00008	0.000114032	1.00102	0.00146686	0.986898	-0.019027	0.987884	-0.017587	12	0.994664	0.994664	0.00232372	0.0396144	FALSE
1088	YESphlox-Diamide3	0.992878	-0.0103118	0.993809	-0.00895901	0.998154	-0.00266539	0.999151	-0.00122534	12	0.400901	0.695153	0.15792	0.0276731	FALSE
1088	YESphlox-Diamide3.5	1.02257	0.0322017	1.02353	0.0335546	1.01338	0.0191766	1.01439	0.0206167	12	0.0562166	0.242294	0.615657	0.0363891	FALSE
1088	YESphlox-EDTA4	0.972463	-0.0402853	0.973375	-0.0389325	0.974627	-0.0370773	0.975601	-0.0356373	12	0.133939	0.587271	0.231162	0.0587832	FALSE
1088	YESphlox-EGTA1	1.00018	0.000253915	1.00111	0.00160675	0.997062	-0.00424529	0.998057	-0.00280525	12	0.982599	0.982599	0.00762378	0.0266959	FALSE
1088	YESphlox-EGTA10	0.985608	-0.0209139	0.986533	-0.0195611	1.00143	0.00206837	1.00243	0.00350842	12	0.61593	0.788943	0.102954	0.0964916	FALSE
1088	YESphlox-EGTA15	1.00416	0.00598432	1.0051	0.00733715	0.978532	-0.0313086	0.97951	-0.0298686	4	0.895803	0.969582	0.0134153	0.0583669	FALSE
1088	YESphlox-EGTA5	0.995133	-0.00703845	0.996067	-0.00568562	0.998472	-0.00220652	0.999469	-0.000766478	12	0.219916	0.853051	0.0690248	0.0117195	FALSE
1088	YESphlox-EtOH0.1	1.02624	0.0373619	1.0272	0.0387147	1.02199	0.0313796	1.02301	0.0328197	16	0.00726128	0.515551	0.287728	0.0335258	FALSE
1088	YESphlox-EtOH10	0.990085	-0.0143759	0.991014	-0.0130231	0.981405	-0.0270794	0.982385	-0.0256394	10	0.286068	0.933315	0.0299716	0.0272266	FALSE
1088	YESphlox-Forma2.5	0.991695	-0.0120317	0.992625	-0.0106788	0.997399	-0.00375776	0.998395	-0.00231771	11	0.220224	0.582584	0.234642	0.0204388	FALSE
1088	YESphlox-Gluc0.1stationary7	0.987063	-0.0187857	0.987989	-0.0174329	0.992841	-0.0103653	0.993833	-0.00892525	22	0.0225574	0.0910352	1.04079	0.023619	FALSE
1088	YESphlox-Gluc0.5stationary7	0.990678	-0.0135114	0.991608	-0.0121586	0.993387	-0.00957154	0.99438	-0.00813149	44	0.0128329	0.0391925	1.4068	0.0211153	FALSE
1088	YESphlox-Gluc1stationary7	0.997234	-0.00399605	0.99817	-0.00264322	0.999561	-0.000633712	1.00056	0.000806335	20	0.498563	0.715111	0.145627	0.0161726	FALSE
1088	YESphlox-Glycerol2	1.00334	0.00481215	1.00428	0.00616499	1.00463	0.00666414	1.00563	0.00810419	12	0.432697	0.801435	0.0961317	0.0129847	FALSE
1088	YESphlox-Glycerol2MMS0.0075	1.00973	0.0139637	1.01067	0.0153165	1.00931	0.0133707	1.01032	0.0148108	12	0.661751	0.853245	0.068926	0.0747802	FALSE
1088	YESphlox-Glycerol3	0.997048	-0.00426466	0.997984	-0.00291183	1.00321	0.00461959	1.00421	0.00605964	12	0.705016	0.915833	0.0381835	0.0256659	FALSE
1088	YESphlox-Glycerol3MMS0.005	0.999129	-0.00125666	1.00007	9.61747e-05	0.990755	-0.0134	0.991744	-0.01196	12	0.873388	0.930526	0.0312716	0.0175208	FALSE
1088	YESphlox-HP10	0.982356	-0.0256824	0.983277	-0.0243295	0.99602	-0.00575303	0.997015	-0.00431299	24	0.534132	0.833481	0.0791041	0.136804	FALSE
1088	YESphlox-HP15	1.10073	0.13846	1.10176	0.139813	1.09499	0.130913	1.09608	0.132353	9	0.185194	0.607994	0.216101	0.208606	FALSE
1088	YESphlox-HP2	0.983857	-0.023479	0.98478	-0.0221262	0.997091	-0.00420291	0.998087	-0.00276286	24	0.0690138	0.489998	0.309806	0.0407289	FALSE
1088	YESphlox-HP4	1.00993	0.0142507	1.01087	0.0156035	1.0137	0.0196283	1.01471	0.0210683	35	0.254385	0.539582	0.267942	0.0496454	FALSE
1088	YESphlox-HP6	1.03896	0.0551434	1.03994	0.0564963	1.01802	0.0257596	1.01903	0.0271997	36	0.0840537	0.314095	0.502939	0.131194	FALSE
1088	YESphlox-HP8	0.972648	-0.0400101	0.973561	-0.0386572	0.995531	-0.00646184	0.996525	-0.00502179	30	0.114088	0.607266	0.216621	0.0915759	FALSE
1088	YESphlox-HU8	0.999092	-0.00131127	1.00003	4.15626e-05	1.00112	0.00161152	1.00212	0.00305157	12	0.837026	0.917509	0.0373896	0.0137121	FALSE
1088	YESphlox-HU8MMS0.075	0.998999	-0.00144515	0.999936	-9.23146e-05	1.00619	0.00890804	1.0072	0.0103481	12	0.936133	0.968538	0.0138834	0.0419237	FALSE
1088	YESphlox-KCl0.5	1.00076	0.00110052	1.0017	0.00245335	0.999002	-0.00144005	1	0	11	0.905931	0.953722	0.0205784	0.0201145	FALSE
1088	YESphlox-KCl0.5SDS0.004	1.00073	0.00105693	1.00167	0.00240976	1.02689	0.0382798	1.02791	0.0397199	11	0.967427	0.995527	0.00194707	0.0578316	FALSE
1088	YESphlox-KCl1	0.99392	-0.0087987	0.994852	-0.00744587	0.999945	-7.96771e-05	1.00094	0.00136037	10	0.378588	0.619188	0.208177	0.0201445	FALSE
1088	YESphlox-LiCl4	0.99355	-0.00933492	0.994483	-0.00798209	1.00393	0.00566436	1.00494	0.0071044	11	0.383936	0.85821	0.0664064	0.0228781	FALSE
1088	YESphlox-LiCl6	1.00142	0.00204863	1.00236	0.00340146	0.998416	-0.00228736	0.999413	-0.000847315	11	0.869859	0.926706	0.0330581	0.0274848	FALSE
1088	YESphlox-MMS0.005	1.0136	0.019493	1.01455	0.0208459	1.00485	0.00697893	1.00585	0.00841898	12	0.123203	0.315079	0.50158	0.0277793	FALSE
1088	YESphlox-MMS0.075	1.00235	0.00338658	1.00329	0.00473941	1.00184	0.00265738	1.00284	0.00409743	24	0.733232	0.805125	0.0941366	0.0322723	FALSE
1088	YESphlox-NaCl150	0.996079	-0.00566798	0.997013	-0.00431514	0.995408	-0.0066402	0.996402	-0.00520016	12	0.631313	0.877703	0.0566524	0.026908	FALSE
1088	YESphlox-NaCl150MMS0.005	1.0038	0.00547697	1.00475	0.0068298	1.0039	0.00561743	1.0049	0.00705747	12	0.365118	0.748633	0.125731	0.0127208	FALSE
1088	YESphlox-Ovana0.5	0.998106	-0.00273513	0.999042	-0.0013823	0.999575	-0.000613514	1.00057	0.000826534	12	0.774093	0.958345	0.0184781	0.0215187	FALSE
1088	YESphlox-Ovana1	1.00877	0.0125915	1.00971	0.0139444	1.00872	0.0125255	1.00973	0.0139656	12	0.434366	0.769228	0.113945	0.037016	FALSE
1088	YESphlox-Ovana4	1.03834	0.0542818	1.03932	0.0556347	1.01192	0.0170924	1.01293	0.0185324	9	0.213561	0.851387	0.0698728	0.0850886	FALSE
1088	YESphlox-Phloxine2	1.00261	0.00375543	1.00355	0.00510826	1.00594	0.00855099	1.00695	0.00999104	12	0.702795	0.933392	0.0299359	0.0223026	FALSE
1088	YESphlox-Phloxine2HP10	1.01807	0.0258361	1.01902	0.027189	1.01313	0.0188145	1.01414	0.0202546	12	0.449823	0.683732	0.165114	0.0797486	FALSE
1088	YESphlox-Phloxine2HP15	1.04943	0.0695993	1.05041	0.0709521	0.996004	-0.00577609	0.996999	-0.00433605	10	0.243631	0.567867	0.245753	0.125292	FALSE
1088	YESphlox-SDS0.004	0.9917	-0.0120238	0.992631	-0.010671	1.00139	0.00200695	1.00239	0.003447	11	0.246575	0.673887	0.171413	0.0217688	FALSE
1088	YESphlox-TBH1	0.999312	-0.000992724	1.00025	0.000360108	1.00038	0.000551274	1.00138	0.00199132	12	0.870998	0.928986	0.031991	0.0130447	FALSE
1088	YESphlox-TBH1.5	1.01122	0.0160999	1.01217	0.0174527	1.03433	0.0486981	1.03536	0.0501382	6	0.801938	0.899142	0.0461717	0.103942	FALSE
1088	YESphlox-TSA1000	0.996685	-0.00479064	0.99762	-0.00343781	0.999002	-0.00144005	1	0	11	0.566341	0.814821	0.0889379	0.0176981	FALSE
1088	YESphlox-TSA500	1.00085	0.00122689	1.00179	0.00257972	0.998641	-0.00196221	0.999638	-0.000522159	11	0.848504	0.94204	0.0259306	0.0132356	FALSE
1088	YESphlox-TeaTree1	1.01457	0.0208616	1.01552	0.0222144	1.01099	0.0157721	1.012	0.0172121	12	0.0034961	0.199277	0.700542	0.0134148	FALSE
1088	YESphlox-TeaTree10	1.01666	0.0238326	1.01761	0.0251854	1.0132	0.0189158	1.01421	0.0203558	12	0.0214766	0.612084	0.213189	0.0212009	FALSE
1088	YESphlox-TeaTree100	1.00279	0.00401307	1.00373	0.0053659	0.999788	-0.000305248	1.00079	0.0011348	12	0.664563	0.951799	0.0214546	0.0208562	FALSE
1088	YESphlox-Temp25	0.994804	-0.00751548	0.995737	-0.00616265	0.997567	-0.00351457	0.998563	-0.00207452	11	0.505654	0.87442	0.0582801	0.0243632	FALSE
1088	YESphlox-Temp25Gluc0.1	0.985173	-0.0215508	0.986097	-0.020198	0.991082	-0.0129231	0.992072	-0.0114831	22	0.0113991	0.0585499	1.23247	0.0241576	FALSE
1088	YESphlox-Temp25Gluc0.5	0.989664	-0.0149899	0.990592	-0.0136371	0.988613	-0.0165215	0.989601	-0.0150814	22	0.149063	0.391724	0.40702	0.0314428	FALSE
1088	YESphlox-Temp25Gluc1	0.983154	-0.0245108	0.984076	-0.0231579	0.983709	-0.0236961	0.984692	-0.0222561	22	0.00685642	0.0512427	1.29037	0.0255516	FALSE
1088	YESphlox-Temp25Gluc3	1.0002	0.000289164	1.00114	0.001642	1.00614	0.00882724	1.00714	0.0102673	11	0.969113	0.994773	0.00227591	0.015765	FALSE
1088	YESphlox-Tuni20	0.970798	-0.0427576	0.971708	-0.0414048	0.976133	-0.034851	0.977107	-0.033411	5	0.0639084	0.549612	0.259944	0.025839	FALSE
1088	YESphlox-Tuni40	0.991584	-0.0121933	0.992514	-0.0108405	1.01715	0.0245389	1.01817	0.025979	8	0.774616	0.894206	0.0485625	0.0799144	FALSE
1088	YESphlox-Tuni60	0.970787	-0.0427727	0.971698	-0.0414198	1.04175	0.0590113	1.04279	0.0604513	7	0.587258	0.897652	0.0468921	0.134871	FALSE
1088	YESphlox-Tuni80	0.974716	-0.036946	0.975631	-0.0355932	0.983004	-0.0247305	0.983986	-0.0232905	8	0.244859	0.861345	0.0648229	0.0562408	FALSE
1088	YESphlox-VPA10	1.00199	0.00286546	1.00293	0.00421829	1.01093	0.0156868	1.01194	0.0171268	9	0.859378	0.911461	0.0402617	0.032236	FALSE
1088	YESphlox-VPA8	0.975003	-0.0365215	0.975918	-0.0351687	0.975816	-0.0353189	0.976791	-0.0338788	8	0.00189576	0.0282258	1.54935	0.0152557	FALSE
1088	YESphlox-Xylose2	0.991329	-0.0125647	0.992259	-0.0112118	1.00032	0.000467746	1.00132	0.00190779	10	0.373374	0.718163	0.143777	0.0288572	FALSE
1088	Yesphlox-Caffeine10	0.9987	-0.00187618	0.999637	-0.000523346	0.948615	-0.0761061	0.949562	-0.0746661	14	0.981817	0.98878	0.00490016	0.209398	FALSE
1088	Yesphlox-DMSO	0.980135	-0.0289476	0.981055	-0.0275948	0.994443	-0.00803918	0.995436	-0.00659913	16	0.215295	0.908621	0.0416172	0.0611228	FALSE
1088	Yesphlox-Gal2	1.00052	0.000745521	1.00146	0.00209835	0.995851	-0.00599762	0.996846	-0.00455758	16	0.973376	0.984815	0.00664521	0.0605829	FALSE
1088	Yesphlox-Rapa1	0.996934	-0.00442958	0.99787	-0.00307674	0.997608	-0.00345505	0.998604	-0.002015	14	0.798069	0.962534	0.0165839	0.0434869	FALSE
1088	Yesphlox-Rapa100	0.997446	-0.00368946	0.998382	-0.00233663	1.00243	0.003498	1.00343	0.00493804	16	0.898998	0.938527	0.0275531	0.0789056	FALSE
1088	Yesphlox-Sorb1.2	0.980123	-0.0289653	0.981043	-0.0276124	0.993403	-0.00954939	0.994395	-0.00810934	14	0.147774	0.855829	0.0676129	0.0480154	FALSE
1088	Yesphlox-Torin5	0.98001	-0.0291316	0.980929	-0.0277788	0.942092	-0.0860596	0.943033	-0.0846195	16	0.553341	0.831803	0.0799797	0.131813	FALSE
1097	EMMphlox-Act0.1	1.02518	0.0358708	0.993539	-0.00935124	1.00736	0.0105787	0.997023	-0.00430121	16	0.201638	0.637245	0.195694	0.0604566	FALSE
1097	EMMphlox-Act1	1.00462	0.00664652	0.973616	-0.0385756	1.0055	0.00791996	0.995187	-0.00695998	16	0.816564	0.950427	0.0220814	0.062586	FALSE
1097	EMMphlox-Act2	1.0088	0.0126335	0.977665	-0.0325886	0.998248	-0.00253027	0.988005	-0.0174102	16	0.668448	0.949196	0.0226441	0.0653787	FALSE
1097	EMMphlox-Cana75	1.01858	0.0265647	0.987151	-0.0186574	1.00304	0.00437851	0.992747	-0.0105014	8	0.295739	0.586342	0.231849	0.0357116	FALSE
1097	EMMphlox-EtOH0.1	0.995247	-0.00687374	0.964534	-0.0520958	0.980572	-0.0283047	0.97051	-0.0431847	16	0.803852	0.931713	0.0307178	0.0589738	FALSE
1097	YES-Bleo200									0					FALSE
1097	YES-Bleo300									0					FALSE
1097	YES-Bleo600									0					FALSE
1097	YES-Bortezomib100									0					FALSE
1097	YES-Bortezomib200									0					FALSE
1097	YES-Bref60									0					FALSE
1097	YES-Calco10KCl0.5									0					FALSE
1097	YES-Calco2									0					FALSE
1097	YES-Calco4KCl0.5									0					FALSE
1097	YES-Cana120									0					FALSE
1097	YES-Cana60									0					FALSE
1097	YES-CoCl0.25									0					FALSE
1097	YES-CoCl5									0					FALSE
1097	YES-Cycloh100									0					FALSE
1097	YES-Cycloh200									0					FALSE
1097	YES-Cycloh400									0					FALSE
1097	YES-Cycloh600									0					FALSE
1097	YES-Dhcumarin100									0					FALSE
1097	YES-Dhcumarin200									0					FALSE
1097	YES-Dhcumarin50									0					FALSE
1097	YES-EDTA0.1									0					FALSE
1097	YES-EDTA0.3									0					FALSE
1097	YES-EDTA0.6									0					FALSE
1097	YES-EtOH5									0					FALSE
1097	YES-Forma2									0					FALSE
1097	YES-Forma3									0					FALSE
1097	YES-HU30									0					FALSE
1097	YES-HU45									0					FALSE
1097	YES-KCl0.5SDS0.01									0					FALSE
1097	YES-KCl1SDS0.01									0					FALSE
1097	YES-Ovana3									0					FALSE
1097	YES-Ovana6									0					FALSE
1097	YES-SDS0.01									0					FALSE
1097	YES-SDS0.02									0					FALSE
1097	YES-TBH15									0					FALSE
1097	YES-UV1000									0					FALSE
1097	YES-UV10m									0					FALSE
1097	YES-UV2000									0					FALSE
1097	YES-UV20m									0					FALSE
1097	YES-UV3000									0					FALSE
1097	YES-UV4000									0					FALSE
1097	YES-UV5m									0					FALSE
1097	YES-UV6000									0					FALSE
1097	YES-UV9000									0					FALSE
1097	YES-VPA5									0					FALSE
1097	YESphlox-Act0.1	0.987782	-0.017735	0.982444	-0.0255533	0.986921	-0.018994	0.986921	-0.018994	16	0.431182	0.861122	0.0649351	0.0565223	FALSE
1097	YESphlox-Act1	0.990785	-0.0133564	0.98543	-0.0211747	1.00636	0.00914031	1.00636	0.00914031	16	0.593696	0.924906	0.0339026	0.0640208	FALSE
1097	YESphlox-Act2	1.00273	0.00393857	0.997314	-0.00387973	0.99573	-0.00617318	0.99573	-0.00617318	16	0.873254	0.918533	0.036905	0.0637111	FALSE
1097	YESphlox-stationary7	1.00253	0.00364598	0.997112	-0.00417232	1	0	1	0	8	0.745385	0.889891	0.0506631	0.0154516	FALSE
1097	YESphlox-Benza12									0					FALSE
1097	YESphlox-Benza4									0					FALSE
1097	YESphlox-Benza8									0					FALSE
1097	YESphlox-Bort500									0					FALSE
1097	YESphlox-CdCl1	1.23367	0.30296	1.22701	0.295142	1.04407	0.0622246	1.04407	0.0622246	3	0.518706	0.874347	0.0583164	0.518389	FALSE
1097	YESphlox-Diamide2									0					FALSE
1097	YESphlox-Diamide3									0					FALSE
1097	YESphlox-Diamide3.5									0					FALSE
1097	YESphlox-EDTA4									0					FALSE
1097	YESphlox-EGTA1									0					FALSE
1097	YESphlox-EGTA10									0					FALSE
1097	YESphlox-EGTA15									0					FALSE
1097	YESphlox-EGTA5									0					FALSE
1097	YESphlox-EtOH0.1	0.984212	-0.0229594	0.978892	-0.0307777	0.991841	-0.0118191	0.991841	-0.0118191	16	0.199799	0.794876	0.0997004	0.0424701	FALSE
1097	YESphlox-EtOH10									0					FALSE
1097	YESphlox-Forma2.5	1.01077	0.0154505	1.0053	0.00763218	1.00244	0.00351286	1.00244	0.00351286	4	0.607527	0.884312	0.0533944	0.0365352	FALSE
1097	YESphlox-Gluc0.1stationary7									0					FALSE
1097	YESphlox-Gluc0.5stationary7									0					FALSE
1097	YESphlox-Gluc1stationary7	0.994433	-0.00805425	0.989058	-0.0158726	0.980782	-0.0279963	0.980782	-0.0279963	8	0.665281	0.836016	0.0777852	0.0317352	FALSE
1097	YESphlox-Glycerol2									0					FALSE
1097	YESphlox-Glycerol2MMS0.0075									0					FALSE
1097	YESphlox-Glycerol3									0					FALSE
1097	YESphlox-Glycerol3MMS0.005									0					FALSE
1097	YESphlox-HP10	0.95898	-0.0604268	0.953797	-0.0682451	0.9583	-0.0614511	0.9583	-0.0614511	12	0.212495	0.655963	0.183121	0.105538	FALSE
1097	YESphlox-HP15									0					FALSE
1097	YESphlox-HP2	0.99692	-0.00444987	0.991532	-0.0122682	0.997813	-0.00315933	0.997813	-0.00315933	12	0.731193	0.927048	0.0328976	0.0242327	FALSE
1097	YESphlox-HP4	0.997628	-0.00342676	0.992236	-0.0112451	0.994644	-0.00774825	0.994644	-0.00774825	23	0.813178	0.923771	0.0344358	0.0399953	FALSE
1097	YESphlox-HP6	0.994347	-0.0081781	0.988973	-0.0159964	1.00476	0.00685485	1.00476	0.00685485	20	0.799949	0.90784	0.0419905	0.0950002	FALSE
1097	YESphlox-HP8	0.973556	-0.0386645	0.968294	-0.0464828	0.99451	-0.0079427	0.99451	-0.0079427	8	0.685481	0.872086	0.0594407	0.175614	FALSE
1097	YESphlox-HU8									0					FALSE
1097	YESphlox-HU8MMS0.075									0					FALSE
1097	YESphlox-KCl0.5									0					FALSE
1097	YESphlox-KCl0.5SDS0.004									0					FALSE
1097	YESphlox-KCl1									0					FALSE
1097	YESphlox-LiCl4									0					FALSE
1097	YESphlox-LiCl6									0					FALSE
1097	YESphlox-MMS0.005									0					FALSE
1097	YESphlox-MMS0.075									0					FALSE
1097	YESphlox-NaCl150									0					FALSE
1097	YESphlox-NaCl150MMS0.005									0					FALSE
1097	YESphlox-Ovana0.5									0					FALSE
1097	YESphlox-Ovana1									0					FALSE
1097	YESphlox-Ovana4	1.04245	0.0599794	1.03682	0.0521611	1.02268	0.0323523	1.02268	0.0323523	4	0.484907	0.855188	0.0679386	0.106015	FALSE
1097	YESphlox-Phloxine2									0					FALSE
1097	YESphlox-Phloxine2HP10									0					FALSE
1097	YESphlox-Phloxine2HP15									0					FALSE
1097	YESphlox-SDS0.004									0					FALSE
1097	YESphlox-TBH1									0					FALSE
1097	YESphlox-TBH1.5									0					FALSE
1097	YESphlox-TSA1000	0.994388	-0.00811884	0.989014	-0.0159371	0.993057	-0.0100511	0.993057	-0.0100511	4	0.736163	0.873997	0.0584901	0.0288997	FALSE
1097	YESphlox-TSA500	1.00031	0.000449666	0.994905	-0.00736864	0.984988	-0.0218224	0.984988	-0.0218224	4	0.987841	0.993499	0.00283246	0.0363963	FALSE
1097	YESphlox-TeaTree1									0					FALSE
1097	YESphlox-TeaTree10									0					FALSE
1097	YESphlox-TeaTree100									0					FALSE
1097	YESphlox-Temp25	1.00111	0.00160263	0.995701	-0.00621567	0.995	-0.00723158	0.995	-0.00723158	4	0.938743	0.950514	0.0220417	0.0248954	FALSE
1097	YESphlox-Temp25Gluc0.1									0					FALSE
1097	YESphlox-Temp25Gluc0.5									0					FALSE
1097	YESphlox-Temp25Gluc1	0.999928	-0.000103208	0.994524	-0.00792151	0.995944	-0.0058641	0.995944	-0.0058641	8	0.993177	0.993177	0.00297356	0.0175806	FALSE
1097	YESphlox-Temp25Gluc3	1.00151	0.00217816	0.996098	-0.00564014	0.99443	-0.00805883	0.99443	-0.00805883	4	0.872405	0.96905	0.0136538	0.0145021	FALSE
1097	YESphlox-Tuni20	0.919066	-0.121759	0.914099	-0.129577	0.917148	-0.124774	0.917148	-0.124774	3	0.177093	0.730913	0.136134	0.0686154	FALSE
1097	YESphlox-Tuni40	1.00147	0.00211947	0.996058	-0.00569883	0.97212	-0.0407933	0.97212	-0.0407933	4	0.981074	0.995502	0.0019579	0.113227	FALSE
1097	YESphlox-Tuni60	0.913659	-0.130272	0.908721	-0.13809	0.908721	-0.13809	0.908721	-0.13809	1					FALSE
1097	YESphlox-Tuni80	1.00039	0.000562756	0.994983	-0.00725555	0.997036	-0.00428295	0.997036	-0.00428295	4	0.988752	0.998207	0.000779581	0.0499226	FALSE
1097	YESphlox-VPA10	1.05555	0.0779998	1.04985	0.0701815	1.02004	0.0286315	1.02004	0.0286315	4	0.264944	0.572499	0.242225	0.0807214	FALSE
1097	YESphlox-VPA8	1.01207	0.0173157	1.0066	0.00949737	1.0066	0.00949737	1.0066	0.00949737	2	0.851514	0.960033	0.0177138	0.071423	FALSE
1097	YESphlox-Xylose2									0					FALSE
1097	Yesphlox-Caffeine10	0.997169	-0.00409052	0.991779	-0.0119088	0.999046	-0.00137629	0.999046	-0.00137629	11	0.892344	0.945618	0.0242842	0.0651095	FALSE
1097	Yesphlox-DMSO	0.973863	-0.0382093	0.9686	-0.0460276	0.962164	-0.0556451	0.962164	-0.0556451	16	0.168732	0.908621	0.0416172	0.069254	FALSE
1097	Yesphlox-Gal2	0.97797	-0.0321385	0.972684	-0.0399568	0.995167	-0.00698932	0.995167	-0.00698932	16	0.301409	0.638806	0.194631	0.0794131	FALSE
1097	Yesphlox-Rapa1	1.0035	0.00503525	0.998073	-0.00278306	1.00296	0.00426238	1.00296	0.00426238	16	0.8024	0.962534	0.0165839	0.0504913	FALSE
1097	Yesphlox-Rapa100	0.984039	-0.0232131	0.97872	-0.0310314	0.992634	-0.0106661	0.992634	-0.0106661	16	0.431518	0.718054	0.143843	0.0758755	FALSE
1097	Yesphlox-Sorb1.2	0.983601	-0.0238544	0.978285	-0.0316727	0.967016	-0.0483877	0.967016	-0.0483877	16	0.280247	0.855829	0.0676129	0.0547027	FALSE
1097	Yesphlox-Torin5	0.912936	-0.131414	0.908002	-0.139232	0.915856	-0.126807	0.915856	-0.126807	16	0.00786294	0.25703	0.590015	0.112157	FALSE
1119	EMMphlox-Act0.1	1.0467	0.065844	0.937839	-0.0925881	1.04522	0.0638134	0.932057	-0.10151	8	0.193696	0.637245	0.195694	0.0582743	FALSE
1119	EMMphlox-Act1	1.04922	0.0693182	0.9401	-0.0891138	1.03468	0.0491824	0.922652	-0.116141	8	0.17879	0.572771	0.242019	0.0604627	FALSE
1119	EMMphlox-Act2	1.07238	0.100818	0.960852	-0.0576142	1.03428	0.0486272	0.922297	-0.116696	8	0.141049	0.743492	0.128724	0.0971027	FALSE
1119	EMMphlox-Cana75	0.970625	-0.0430146	0.869678	-0.201447	1.00753	0.0108175	0.89844	-0.154506	4	0.55438	0.749732	0.125094	0.0701057	FALSE
1119	EMMphlox-EtOH0.1	1.04912	0.0691841	0.940013	-0.0892479	1.04713	0.0664394	0.933755	-0.0988842	8	0.226966	0.855105	0.0679805	0.0743908	FALSE
1119	YES-Bleo200									0					FALSE
1119	YES-Bleo300									0					FALSE
1119	YES-Bleo600									0					FALSE
1119	YES-Bortezomib100									0					FALSE
1119	YES-Bortezomib200									0					FALSE
1119	YES-Bref60									0					FALSE
1119	YES-Calco10KCl0.5									0					FALSE
1119	YES-Calco2									0					FALSE
1119	YES-Calco4KCl0.5									0					FALSE
1119	YES-Cana120									0					FALSE
1119	YES-Cana60									0					FALSE
1119	YES-CoCl0.25									0					FALSE
1119	YES-CoCl5									0					FALSE
1119	YES-Cycloh100									0					FALSE
1119	YES-Cycloh200									0					FALSE
1119	YES-Cycloh400									0					FALSE
1119	YES-Cycloh600									0					FALSE
1119	YES-Dhcumarin100									0					FALSE
1119	YES-Dhcumarin200									0					FALSE
1119	YES-Dhcumarin50									0					FALSE
1119	YES-EDTA0.1									0					FALSE
1119	YES-EDTA0.3									0					FALSE
1119	YES-EDTA0.6									0					FALSE
1119	YES-EtOH5									0					FALSE
1119	YES-Forma2									0					FALSE
1119	YES-Forma3									0					FALSE
1119	YES-HU30									0					FALSE
1119	YES-HU45									0					FALSE
1119	YES-KCl0.5SDS0.01									0					FALSE
1119	YES-KCl1SDS0.01									0					FALSE
1119	YES-Ovana3									0					FALSE
1119	YES-Ovana6									0					FALSE
1119	YES-SDS0.01									0					FALSE
1119	YES-SDS0.02									0					FALSE
1119	YES-TBH15									0					FALSE
1119	YES-UV1000									0					FALSE
1119	YES-UV10m									0					FALSE
1119	YES-UV2000									0					FALSE
1119	YES-UV20m									0					FALSE
1119	YES-UV3000									0					FALSE
1119	YES-UV4000									0					FALSE
1119	YES-UV5m									0					FALSE
1119	YES-UV6000									0					FALSE
1119	YES-UV9000									0					FALSE
1119	YES-VPA5									0					FALSE
1119	YESphlox-Act0.1	1.02453	0.0349605	0.979827	-0.0294005	1.05692	0.0798715	1.00466	0.00671111	8	0.490397	0.865687	0.0626389	0.0846969	FALSE
1119	YESphlox-Act1	1.06301	0.0881536	1.01663	0.0237927	1.0957	0.131858	1.04153	0.0586977	8	0.350266	0.913949	0.0390778	0.16727	FALSE
1119	YESphlox-Act2	1.02823	0.0401629	0.983367	-0.0241981	1.03744	0.0530242	0.98614	-0.0201362	8	0.658126	0.874672	0.0581549	0.161707	FALSE
1119	YESphlox-stationary7	0.969512	-0.0446697	0.927211	-0.109031	0.977631	-0.032638	0.929291	-0.105798	4	0.281431	0.864877	0.0630456	0.0413962	FALSE
1119	YESphlox-Benza12									0					FALSE
1119	YESphlox-Benza4									0					FALSE
1119	YESphlox-Benza8									0					FALSE
1119	YESphlox-Bort500									0					FALSE
1119	YESphlox-CdCl1	1.12777	0.173476	1.07857	0.109115	1.13467	0.182276	1.07857	0.109115	2	0.177996	0.835165	0.0782275	0.0579628	FALSE
1119	YESphlox-Diamide2									0					FALSE
1119	YESphlox-Diamide3									0					FALSE
1119	YESphlox-Diamide3.5									0					FALSE
1119	YESphlox-EDTA4									0					FALSE
1119	YESphlox-EGTA1									0					FALSE
1119	YESphlox-EGTA10									0					FALSE
1119	YESphlox-EGTA15									0					FALSE
1119	YESphlox-EGTA5									0					FALSE
1119	YESphlox-EtOH0.1	1.041	0.057964	0.995576	-0.00639694	1.03578	0.0507108	0.98456	-0.0224496	8	0.472505	0.917114	0.0375766	0.142216	FALSE
1119	YESphlox-EtOH10									0					FALSE
1119	YESphlox-Forma2.5	1.00797	0.0114581	0.963995	-0.0529028	1.01414	0.0202576	0.963995	-0.0529028	2	0.689975	0.884423	0.05334	0.0170924	FALSE
1119	YESphlox-Gluc0.1stationary7									0					FALSE
1119	YESphlox-Gluc0.5stationary7									0					FALSE
1119	YESphlox-Gluc1stationary7	0.933941	-0.098596	0.893192	-0.162957	0.939881	-0.0894502	0.893407	-0.162611	4	0.0694292	0.328631	0.483291	0.048165	FALSE
1119	YESphlox-Glycerol2									0					FALSE
1119	YESphlox-Glycerol2MMS0.0075									0					FALSE
1119	YESphlox-Glycerol3									0					FALSE
1119	YESphlox-Glycerol3MMS0.005									0					FALSE
1119	YESphlox-HP10	1.08456	0.117112	1.03724	0.0527506	1.10588	0.145195	1.0512	0.0720343	6	0.0832409	0.537282	0.269798	0.0908141	FALSE
1119	YESphlox-HP15									0					FALSE
1119	YESphlox-HP2	0.90813	-0.139029	0.868508	-0.20339	0.903105	-0.147035	0.858449	-0.220195	6	0.00164511	0.0778688	1.10864	0.0422335	FALSE
1119	YESphlox-HP4	1.00346	0.00497796	0.959674	-0.059383	0.977966	-0.0321434	0.929609	-0.105304	12	0.934574	0.965597	0.0152042	0.129033	FALSE
1119	YESphlox-HP6	1.12398	0.168614	1.07494	0.104253	1.08303	0.115074	1.02948	0.0419131	10	0.106998	0.329562	0.482063	0.206981	FALSE
1119	YESphlox-HP8	1.16122	0.215635	1.11055	0.151274	0.995204	-0.00693519	0.945995	-0.0800956	4	0.521299	0.789441	0.102681	0.425368	FALSE
1119	YESphlox-HU8									0					FALSE
1119	YESphlox-HU8MMS0.075									0					FALSE
1119	YESphlox-KCl0.5									0					FALSE
1119	YESphlox-KCl0.5SDS0.004									0					FALSE
1119	YESphlox-KCl1									0					FALSE
1119	YESphlox-LiCl4									0					FALSE
1119	YESphlox-LiCl6									0					FALSE
1119	YESphlox-MMS0.005									0					FALSE
1119	YESphlox-MMS0.075									0					FALSE
1119	YESphlox-NaCl150									0					FALSE
1119	YESphlox-NaCl150MMS0.005									0					FALSE
1119	YESphlox-Ovana0.5									0					FALSE
1119	YESphlox-Ovana1									0					FALSE
1119	YESphlox-Ovana4	0.904371	-0.145014	0.864912	-0.209375	0.909904	-0.136214	0.864912	-0.209375	2	0.114808	0.851387	0.0698728	0.0363162	FALSE
1119	YESphlox-Phloxine2									0					FALSE
1119	YESphlox-Phloxine2HP10									0					FALSE
1119	YESphlox-Phloxine2HP15									0					FALSE
1119	YESphlox-SDS0.004									0					FALSE
1119	YESphlox-TBH1									0					FALSE
1119	YESphlox-TBH1.5									0					FALSE
1119	YESphlox-TSA1000	0.99553	-0.00646383	0.952094	-0.0708248	1.00162	0.00233562	0.952094	-0.0708248	2	0.927122	0.959139	0.0181186	0.0516849	FALSE
1119	YESphlox-TSA500	0.969122	-0.0452499	0.926838	-0.109611	0.975051	-0.0364505	0.926838	-0.109611	2	0.797698	0.926563	0.0331252	0.126804	FALSE
1119	YESphlox-TeaTree1									0					FALSE
1119	YESphlox-TeaTree10									0					FALSE
1119	YESphlox-TeaTree100									0					FALSE
1119	YESphlox-Temp25	0.995127	-0.00704693	0.951709	-0.0714079	1.00122	0.00175253	0.951709	-0.0714079	2	0.927598	0.950514	0.0220417	0.0569041	FALSE
1119	YESphlox-Temp25Gluc0.1									0					FALSE
1119	YESphlox-Temp25Gluc0.5									0					FALSE
1119	YESphlox-Temp25Gluc1	0.9327	-0.100515	0.892005	-0.164876	0.926625	-0.109942	0.880807	-0.183103	4	0.0588736	0.187753	0.726412	0.0464202	FALSE
1119	YESphlox-Temp25Gluc3	0.972027	-0.0409324	0.929616	-0.105293	0.977973	-0.032133	0.929616	-0.105293	2	0.23735	0.836659	0.0774514	0.019233	FALSE
1119	YESphlox-Tuni20	0.939434	-0.0901365	0.898445	-0.154498	0.945181	-0.0813371	0.898445	-0.154498	2	0.701582	0.922873	0.0348582	0.161803	FALSE
1119	YESphlox-Tuni40	1.09912	0.136345	1.05116	0.0719841	1.10584	0.145144	1.05116	0.0719841	2	0.0484941	0.446145	0.350524	0.0271612	FALSE
1119	YESphlox-Tuni60	0.961319	-0.0569134	0.919375	-0.121274	0.9672	-0.0481139	0.919375	-0.121274	2	0.859293	0.977931	0.00969185	0.232707	FALSE
1119	YESphlox-Tuni80	0.941836	-0.0864518	0.900743	-0.150813	0.947598	-0.0776523	0.900743	-0.150813	2	0.489485	0.880822	0.0551119	0.0774371	FALSE
1119	YESphlox-VPA10	1.07759	0.107802	1.03057	0.0434412	1.08418	0.116602	1.03057	0.0434412	2	0.327468	0.636743	0.196036	0.0631042	FALSE
1119	YESphlox-VPA8	0.988219	-0.0170976	0.945102	-0.0814585	0.994265	-0.00829812	0.945102	-0.0814585	2	0.87406	0.960033	0.0177138	0.0790291	FALSE
1119	YESphlox-Xylose2									0					FALSE
1119	Yesphlox-Caffeine10	1.12109	0.164898	1.07217	0.100537	1.16357	0.218555	1.10603	0.145395	6	0.206124	0.731691	0.135672	0.194151	FALSE
1119	Yesphlox-DMSO	1.09224	0.127294	1.04459	0.0629332	1.09513	0.1311	1.04098	0.05794	8	0.113136	0.908621	0.0416172	0.135379	FALSE
1119	Yesphlox-Gal2	0.939289	-0.0903589	0.898307	-0.15472	0.961081	-0.0572697	0.913559	-0.13043	8	0.469378	0.716685	0.144672	0.212151	FALSE
1119	Yesphlox-Rapa1	1.04388	0.0619505	0.998331	-0.00241048	1.01761	0.0251888	0.967295	-0.0479716	8	0.321331	0.829294	0.0812912	0.106529	FALSE
1119	Yesphlox-Rapa100	1.09455	0.130343	1.0468	0.0659819	1.04008	0.0566984	0.988654	-0.016462	8	0.236	0.603112	0.219602	0.195028	FALSE
1119	Yesphlox-Sorb1.2	1.08825	0.122016	1.04077	0.0576548	1.05599	0.0785928	1.00377	0.00543235	8	0.108498	0.855829	0.0676129	0.127252	FALSE
1119	Yesphlox-Torin5	1.05326	0.0748589	1.0073	0.0104979	0.881106	-0.182613	0.837538	-0.255773	7	0.714097	0.90612	0.0428141	0.349348	FALSE
1122	EMM-3AT4	0.989983	-0.0145246	0.996155	-0.00555835	1.00473	0.00681468	1.00784	0.0112665	12	0.401827	0.77381	0.111366	0.0390918	FALSE
1122	EMM-3AT6	1.01146	0.016442	1.01777	0.0254082	1.00129	0.0018556	1.00438	0.00630739	11	0.381858	0.819217	0.0866011	0.0410094	FALSE
1122	EMM-Bleo200	0.996983	-0.0043587	1.0032	0.0046075	1.00368	0.00529551	1.00678	0.0097473	12	0.598654	0.733834	0.134402	0.0172198	FALSE
1122	EMM-Canav60	0.990046	-0.014433	0.996218	-0.00546676	0.995726	-0.00617863	0.998804	-0.00172684	12	0.216003	0.76951	0.113786	0.0250889	FALSE
1122	EMM-Cys	0.981665	-0.0266979	0.987785	-0.0177317	0.998781	-0.00176008	1.00187	0.00269171	24	0.318564	0.618861	0.208407	0.0877361	FALSE
1122	EMM-Met	1.01534	0.0219643	1.02167	0.0309305	1.00111	0.00159409	1.0042	0.00604588	24	0.187883	0.704828	0.151917	0.0542947	FALSE
1122	EMMphlox-Act0.1	1.0056	0.0080583	0.995729	-0.00617552	0.99027	-0.0141067	0.985514	-0.0210516	24	0.611671	0.898054	0.0466976	0.0453714	FALSE
1122	EMMphlox-Act1	0.994191	-0.0084044	0.984431	-0.0226382	0.991451	-0.0123863	0.98669	-0.0193312	24	0.585259	0.862946	0.0640163	0.0431707	FALSE
1122	EMMphlox-Act2	1.00274	0.00394908	0.992897	-0.0102847	1.00283	0.00408054	0.998017	-0.00286438	24	0.776954	0.972997	0.0118884	0.0376397	FALSE
1122	EMMphlox-Cana75	0.993718	-0.00909212	0.983962	-0.0233259	0.995312	-0.0067789	0.990532	-0.0137238	28	0.493397	0.731668	0.135686	0.0373203	FALSE
1122	EMMphlox-EtOH0.1	1.0094	0.0134987	0.999491	-0.000735143	0.99799	-0.00290312	0.993197	-0.00984803	24	0.379387	0.855105	0.0679805	0.043284	FALSE
1122	YES-Bleo200	1.01556	0.0222781	1.02748	0.039116	1.01495	0.0214087	1.02309	0.032929	12	0.0374575	0.533769	0.272647	0.0225083	FALSE
1122	YES-Bleo300	1.0101	0.0144998	1.02196	0.0313377	1.0137	0.0196241	1.02182	0.0311445	4	0.528303	0.927189	0.0328319	0.0285918	FALSE
1122	YES-Bleo600	1.02186	0.031191	1.03385	0.0480289	1.02421	0.0345171	1.03243	0.0460374	8	0.0842082	0.50598	0.295867	0.0308971	FALSE
1122	YES-Bortezomib100	0.992264	-0.0112036	1.00391	0.0056343	0.988054	-0.017338	0.995976	-0.00581762	12	0.402726	0.726906	0.138522	0.0304655	FALSE
1122	YES-Bortezomib200	0.983935	-0.0233656	0.995486	-0.00652772	0.992047	-0.0115203	1	0	12	0.0420721	0.233284	0.632115	0.0239534	FALSE
1122	YES-Bref60	1.0067	0.00962886	1.01851	0.0264668	1.02817	0.0400739	1.03641	0.0515942	11	0.834398	0.918342	0.0369957	0.104517	FALSE
1122	YES-Calco10KCl0.5	1.07297	0.101605	1.08556	0.118443	1.08248	0.114345	1.09116	0.125865	12	0.00014528	0.00828098	2.08192	0.0455337	TRUE
1122	YES-Calco2	1.01354	0.0194024	1.02544	0.0362403	1.02055	0.0293482	1.02873	0.0408685	12	0.0950521	0.433438	0.363073	0.025354	FALSE
1122	YES-Calco4KCl0.5	1.02296	0.0327513	1.03497	0.0495892	1.02317	0.0330389	1.03137	0.0445592	12	0.0178896	0.307303	0.512434	0.0286358	FALSE
1122	YES-Cana120	1.01594	0.0228164	1.02787	0.0396543	1.01817	0.0259854	1.02634	0.0375058	12	0.0454886	0.373089	0.428187	0.024236	FALSE
1122	YES-Cana60	1.0208	0.0296964	1.03278	0.0465343	1.02504	0.0356827	1.03326	0.0472031	12	0.0473831	0.415513	0.381415	0.0322585	FALSE
1122	YES-CoCl0.25	1.00449	0.00645721	1.01628	0.0232951	1.01723	0.0246405	1.02538	0.0361609	12	0.619607	0.946639	0.0238155	0.0300496	FALSE
1122	YES-CoCl5	1.00033	0.000482614	1.01208	0.0173205	1.00198	0.00285954	1.01002	0.0143799	12	0.924708	0.956917	0.0191257	0.0100377	FALSE
1122	YES-Cycloh100	0.993592	-0.00927393	1.00526	0.00756397	0.99567	-0.00626063	1.00365	0.00525972	12	0.0890911	0.557757	0.253555	0.0104866	FALSE
1122	YES-Cycloh200	1.04696	0.0662106	1.05925	0.0830485	0.987216	-0.0185618	0.995131	-0.0070415	12	0.438175	0.838982	0.0762472	0.2045	FALSE
1122	YES-Cycloh400	1.00175	0.00252654	1.01351	0.0193644	0.996273	-0.00538755	1.00426	0.0061328	11	0.799515	0.910746	0.0406028	0.0216159	FALSE
1122	YES-Cycloh600	1.01283	0.0183889	1.02472	0.0352268	1.01394	0.019966	1.02206	0.0314864	12	0.0505132	0.424903	0.37171	0.0197858	FALSE
1122	YES-Dhcumarin100	0.986763	-0.0192245	0.998347	-0.00238665	0.989449	-0.0153023	0.997382	-0.00378191	12	0.0481698	0.39224	0.406449	0.0202058	FALSE
1122	YES-Dhcumarin200	0.974869	-0.0367203	0.986313	-0.0198824	0.979947	-0.0292245	0.987803	-0.0177042	12	0.00177942	0.0507134	1.29488	0.0215715	FALSE
1122	YES-Dhcumarin50	0.986005	-0.0203333	0.99758	-0.00349539	0.992047	-0.0115203	1	0	12	0.135836	0.442437	0.354149	0.0299001	FALSE
1122	YES-EDTA0.1	1.00969	0.0139182	1.02155	0.030756	1.00722	0.0103801	1.0153	0.0219004	12	0.152548	0.695617	0.15763	0.0212695	FALSE
1122	YES-EDTA0.3	1.01436	0.0205765	1.02627	0.0374144	1.00967	0.0138865	1.01777	0.0254068	12	0.0833421	0.400018	0.397921	0.0258396	FALSE
1122	YES-EDTA0.6	1.02464	0.0351131	1.03667	0.051951	1.01936	0.0276592	1.02753	0.0391795	12	0.00139054	0.158521	0.799913	0.020467	FALSE
1122	YES-EtOH5	0.997098	-0.00419215	1.0088	0.0126458	1.00011	0.000162373	1.00813	0.0116827	12	0.507972	0.904825	0.0434353	0.0132908	FALSE
1122	YES-Forma2	0.995984	-0.00580616	1.00768	0.0110317	1.00595	0.00856073	1.01402	0.0200811	12	0.64631	0.909622	0.041139	0.0290802	FALSE
1122	YES-Forma3	0.998213	-0.00258051	1.00993	0.0142574	1.0024	0.00345885	1.01044	0.0149792	12	0.788393	0.881146	0.0549523	0.0217535	FALSE
1122	YES-HU30	0.987405	-0.0182865	0.998996	-0.00144861	0.992525	-0.010825	1.00048	0.000695302	12	0.00569855	0.0764607	1.11656	0.0123121	FALSE
1122	YES-HU45	0.983653	-0.023779	0.9952	-0.00694106	0.993863	-0.00888127	1.00183	0.00263908	12	0.0186854	0.304305	0.516691	0.0203107	FALSE
1122	YES-KCl0.5SDS0.01	1.03178	0.0451324	1.04389	0.0619703	1.03476	0.0493024	1.04306	0.0608227	11	0.0120922	0.137851	0.860589	0.0347542	FALSE
1122	YES-KCl1SDS0.01	1.09679	0.133291	1.10967	0.150129	1.11151	0.152516	1.12042	0.164036	12	1.4383e-05	0.000819828	3.08628	0.0468264	TRUE
1122	YES-Ovana3	0.955804	-0.0652131	0.967025	-0.0483752	0.956353	-0.0643852	0.96402	-0.0528649	8	0.186973	0.581544	0.235417	0.0863603	FALSE
1122	YES-Ovana6	0.968026	-0.0468822	0.97939	-0.0300443	0.987637	-0.0179472	0.995555	-0.00642684	8	0.056886	0.376779	0.423913	0.040081	FALSE
1122	YES-SDS0.01	1.02688	0.0382627	1.03893	0.0551006	1.04223	0.0596779	1.05059	0.0711983	14	0.0215435	0.373687	0.427492	0.0386031	FALSE
1122	YES-SDS0.02	0.99396	-0.00874046	1.00563	0.00809744	0.995554	-0.0064281	1.00354	0.00509224	10	0.365287	0.584254	0.233398	0.0194265	FALSE
1122	YES-TBH15	0.913736	-0.130151	0.924463	-0.113313	0.878858	-0.186297	0.885904	-0.174777	7	0.46114	0.80899	0.0920571	0.293311	FALSE
1122	YES-UV1000	1.0648	0.0905809	1.0773	0.107419	1.03865	0.0547031	1.04697	0.0662235	12	0.184268	0.839481	0.0759889	0.160193	FALSE
1122	YES-UV10m	0.971511	-0.0416982	0.982916	-0.0248603	1.0027	0.00389308	1.01074	0.0154134	11	0.235121	0.633207	0.198454	0.0754433	FALSE
1122	YES-UV2000	1.01292	0.018517	1.02481	0.0353549	1.01359	0.0194717	1.02171	0.0309921	12	0.124729	0.637223	0.195708	0.0266032	FALSE
1122	YES-UV20m	1.00198	0.00286013	1.01375	0.019698	1.00159	0.0022956	1.00962	0.0138159	12	0.62556	0.91754	0.0373751	0.012115	FALSE
1122	YES-UV3000	0.997322	-0.00386823	1.00903	0.0129697	1.00173	0.00249841	1.00976	0.0140188	12	0.511128	0.926811	0.0330089	0.0121078	FALSE
1122	YES-UV4000	0.999745	-0.000367221	1.01148	0.0164707	1.00724	0.0104041	1.01531	0.0219244	10	0.978623	0.991599	0.003664	0.0289209	FALSE
1122	YES-UV5m	1.04924	0.0693409	1.06155	0.0861788	0.996994	-0.00434343	1.00499	0.00717692	12	0.46238	0.825556	0.0832537	0.226522	FALSE
1122	YES-UV6000	1.00746	0.0107161	1.01928	0.027554	1.00955	0.013712	1.01764	0.0252323	12	0.0722888	0.380467	0.419683	0.01182	FALSE
1122	YES-UV9000	0.994775	-0.00755843	1.00645	0.00927947	0.997436	-0.00370367	1.00543	0.00781668	12	0.263121	0.562232	0.250084	0.0141583	FALSE
1122	YES-VPA5	1.00431	0.00620782	1.0161	0.0230457	0.999104	-0.00129312	1.00711	0.0102272	12	0.671838	0.870135	0.0604136	0.0340773	FALSE
1122	YESphlox-Act0.1	0.995818	-0.00604528	1.00576	0.00828871	0.993706	-0.00910937	1.00213	0.00306403	24	0.64301	0.922856	0.0348659	0.0430344	FALSE
1122	YESphlox-Act1	1.00297	0.00427412	1.01298	0.0186081	1.00255	0.00367527	1.01105	0.0158487	24	0.732139	0.928248	0.032336	0.0413082	FALSE
1122	YESphlox-Act2	1.00308	0.00443766	1.0131	0.0187717	0.998294	-0.00246279	1.00675	0.00971061	24	0.790728	0.908965	0.0414527	0.0559862	FALSE
1122	YESphlox-stationary7	1.00195	0.00281423	1.01196	0.0171482	0.99322	-0.00981487	1.00164	0.00235852	28	0.67817	0.889891	0.0506631	0.0226746	FALSE
1122	YESphlox-Benza12	1.00046	0.000670351	1.01045	0.0150043	1.00282	0.00406086	1.01132	0.0162343	12	0.908017	0.961871	0.0168832	0.0120908	FALSE
1122	YESphlox-Benza4	0.991667	-0.0120729	1.00157	0.00226113	0.987358	-0.0183547	0.995725	-0.00618131	12	0.283566	0.673503	0.17166	0.0251248	FALSE
1122	YESphlox-Benza8	1.00617	0.00887446	1.01622	0.0232085	1.00902	0.0129591	1.01757	0.0251325	12	0.199253	0.545994	0.262812	0.0146158	FALSE
1122	YESphlox-Bort500	0.990199	-0.0142098	1.00009	0.000124187	0.975217	-0.0362048	0.983481	-0.0240314	11	0.32688	0.573298	0.24162	0.0313052	FALSE
1122	YESphlox-CdCl1	0.952533	-0.0701593	0.962044	-0.0558253	0.974843	-0.0367582	0.983103	-0.0245848	6	0.414737	0.835165	0.0782275	0.132042	FALSE
1122	YESphlox-Diamide2	1.00628	0.00903728	1.01633	0.0233713	1.00249	0.0035865	1.01098	0.0157599	12	0.359089	0.743589	0.128667	0.0221057	FALSE
1122	YESphlox-Diamide3	1.00129	0.00186074	1.01129	0.0161947	0.991826	-0.0118408	1.00023	0.000332609	12	0.9468	0.962293	0.0166926	0.0658236	FALSE
1122	YESphlox-Diamide3.5	0.968995	-0.0454391	0.97867	-0.0311051	0.973708	-0.038439	0.981959	-0.0262656	12	0.000796495	0.0227001	1.64397	0.0239427	FALSE
1122	YESphlox-EDTA4	1.02724	0.0387726	1.0375	0.0531066	1.02446	0.0348613	1.03314	0.0470347	12	0.123074	0.561218	0.250869	0.0567879	FALSE
1122	YESphlox-EGTA1	0.998905	-0.00158062	1.00888	0.0127534	0.995063	-0.00714002	1.00349	0.00503338	12	0.851151	0.98026	0.00865871	0.0188435	FALSE
1122	YESphlox-EGTA10	1.00557	0.00801178	1.01561	0.0223458	0.985051	-0.0217301	0.993398	-0.00955672	12	0.808432	0.904173	0.0437483	0.0781793	FALSE
1122	YESphlox-EGTA15	0.976793	-0.0338746	0.986547	-0.0195406	0.960775	-0.0577293	0.968916	-0.0455559	6	0.59051	0.969582	0.0134153	0.0998477	FALSE
1122	YESphlox-EGTA5	0.998631	-0.00197598	1.0086	0.012358	0.999553	-0.000644926	1.00802	0.0115285	12	0.852522	0.96353	0.0161349	0.0243018	FALSE
1122	YESphlox-EtOH0.1	0.999442	-0.000805144	1.00942	0.0135289	0.99927	-0.00105367	1.00774	0.0111197	24	0.962401	0.985275	0.00644254	0.0571489	FALSE
1122	YESphlox-EtOH10	1.04391	0.0620009	1.05434	0.0763349	1.01897	0.0271112	1.0276	0.0392846	12	0.333279	0.933315	0.0299716	0.151688	FALSE
1122	YESphlox-Forma2.5	0.998226	-0.00256205	1.00819	0.0117719	0.992876	-0.0103139	1.00129	0.00185953	14	0.867755	0.965087	0.0154335	0.038839	FALSE
1122	YESphlox-Gluc0.1stationary7	0.996915	-0.00445769	1.00687	0.0098763	0.99548	-0.00653558	1.00392	0.00563782	24	0.534631	0.764725	0.116495	0.0223177	FALSE
1122	YESphlox-Gluc0.5stationary7	0.997331	-0.00385596	1.00729	0.010478	1.00074	0.001064	1.00922	0.0132374	48	0.430962	0.640772	0.193296	0.0192674	FALSE
1122	YESphlox-Gluc1stationary7	1.01337	0.0191637	1.02349	0.0334977	1.01424	0.0204007	1.02284	0.0325741	25	0.0213837	0.209714	0.678374	0.0260705	FALSE
1122	YESphlox-Glycerol2	0.989704	-0.0149305	0.999587	-0.000596484	0.992621	-0.0106851	1.00103	0.00148828	12	0.0755441	0.50659	0.295344	0.0175422	FALSE
1122	YESphlox-Glycerol2MMS0.0075	0.997292	-0.0039127	1.00725	0.0104213	0.987643	-0.0179388	0.996012	-0.00576544	12	0.820933	0.922553	0.0350085	0.040355	FALSE
1122	YESphlox-Glycerol3	0.995904	-0.00592196	1.00585	0.00841204	0.999475	-0.000757193	1.00794	0.0114162	12	0.584784	0.868674	0.0611429	0.0246355	FALSE
1122	YESphlox-Glycerol3MMS0.005	0.996289	-0.00536334	1.00624	0.00897065	0.990671	-0.0135224	0.999065	-0.00134902	12	0.624289	0.781637	0.106995	0.0249457	FALSE
1122	YESphlox-HP10	0.990254	-0.0141297	1.00014	0.000204271	0.975563	-0.0356927	0.98383	-0.0235193	34	0.707161	0.898422	0.0465194	0.151046	FALSE
1122	YESphlox-HP15	1.04228	0.0597384	1.05268	0.0740723	0.991598	-0.0121734	1	0	9	0.336736	0.747008	0.126675	0.125248	FALSE
1122	YESphlox-HP2	0.999839	-0.000232163	1.00982	0.0141018	1.00478	0.00687811	1.01329	0.0190515	30	0.985605	0.992595	0.00322778	0.0477464	FALSE
1122	YESphlox-HP4	1.00281	0.00404261	1.01282	0.0183766	0.996006	-0.00577295	1.00445	0.00640045	48	0.631649	0.801796	0.0959363	0.0383858	FALSE
1122	YESphlox-HP6	1.0366	0.0518638	1.04695	0.0661978	1.00587	0.00844643	1.0144	0.0206198	46	0.0147797	0.0974226	1.01134	0.0981322	FALSE
1122	YESphlox-HP8	1.02841	0.0404089	1.03867	0.0547429	0.998878	-0.00161921	1.00734	0.0105542	37	0.145441	0.652689	0.185293	0.11671	FALSE
1122	YESphlox-HU8	0.997633	-0.00341903	1.00759	0.010915	0.991598	-0.0121734	1	0	12	0.712672	0.837573	0.0769773	0.0209305	FALSE
1122	YESphlox-HU8MMS0.075	0.998603	-0.00201684	1.00857	0.0123172	0.996074	-0.00567512	1.00451	0.00649827	12	0.91057	0.968538	0.0138834	0.0420241	FALSE
1122	YESphlox-KCl0.5	1.0228	0.0325201	1.03301	0.0468541	1.02044	0.0291963	1.02909	0.0413697	12	0.000166323	0.00632026	2.19926	0.0148738	FALSE
1122	YESphlox-KCl0.5SDS0.004	1.04016	0.0568103	1.05055	0.0711443	1.04394	0.0620369	1.05278	0.0742103	12	0.00381442	0.108711	0.963727	0.0384733	FALSE
1122	YESphlox-KCl1	1.05184	0.0729137	1.06234	0.0872477	1.05435	0.0763582	1.06329	0.0885316	12	6.85614e-05	0.003908	2.40805	0.0299759	TRUE
1122	YESphlox-LiCl4	1.00912	0.0130929	1.01919	0.0274269	1.00525	0.00755308	1.01377	0.0197265	12	0.154929	0.600427	0.22154	0.0200556	FALSE
1122	YESphlox-LiCl6	1.01946	0.0278049	1.02964	0.0421389	1.02229	0.0317993	1.03095	0.0439727	12	0.0267266	0.203122	0.692242	0.0262626	FALSE
1122	YESphlox-MMS0.005	1.00322	0.00463908	1.01324	0.0189731	1.00207	0.00298979	1.01057	0.0151632	12	0.636287	0.805964	0.0936846	0.0222531	FALSE
1122	YESphlox-MMS0.075	1.00605	0.00870392	1.0161	0.0230379	1.00639	0.00918737	1.01492	0.0213608	24	0.501744	0.60361	0.219243	0.042861	FALSE
1122	YESphlox-NaCl150	0.997522	-0.00357912	1.00748	0.0107549	0.9943	-0.00824745	1.00272	0.00392595	12	0.542809	0.877703	0.0566524	0.0122051	FALSE
1122	YESphlox-NaCl150MMS0.005	1.00904	0.0129764	1.01911	0.0273104	1.00474	0.00682651	1.01326	0.0189999	12	0.16504	0.570653	0.243628	0.0204309	FALSE
1122	YESphlox-Ovana0.5	1.00294	0.00422866	1.01295	0.0185627	0.991598	-0.0121734	1	0	12	0.690935	0.958345	0.0184781	0.0243093	FALSE
1122	YESphlox-Ovana1	1.00803	0.0115387	1.0181	0.0258727	1.012	0.017208	1.02057	0.0293814	11	0.239571	0.620707	0.207114	0.020737	FALSE
1122	YESphlox-Ovana4	1.02037	0.0290916	1.03056	0.0434256	1.02294	0.0327187	1.03161	0.0448921	11	0.463716	0.855188	0.0679386	0.0893553	FALSE
1122	YESphlox-Phloxine2	0.999119	-0.00127166	1.0091	0.0130623	0.998314	-0.00243429	1.00677	0.00973911	12	0.920125	0.969502	0.0134513	0.0293275	FALSE
1122	YESphlox-Phloxine2HP10	0.955616	-0.0654967	0.965158	-0.0511627	0.964742	-0.0517848	0.972917	-0.0396114	12	0.00799963	0.13028	0.885123	0.047978	FALSE
1122	YESphlox-Phloxine2HP15	1.04017	0.0568219	1.05056	0.0711559	1.07678	0.106726	1.08591	0.118899	9	0.433902	0.755011	0.122047	0.147652	FALSE
1122	YESphlox-SDS0.004	0.996603	-0.00490888	1.00655	0.00942511	1.00414	0.0059667	1.01265	0.0181401	11	0.653147	0.942516	0.0257111	0.0237836	FALSE
1122	YESphlox-TBH1	0.990414	-0.0138958	1.0003	0.000438241	0.991746	-0.0119578	1.00015	0.000215628	12	0.0238232	0.15088	0.821368	0.0118503	FALSE
1122	YESphlox-TBH1.5	0.973083	-0.0393647	0.9828	-0.0250307	0.939338	-0.0902837	0.947298	-0.0781103	7	0.570522	0.781827	0.106889	0.11981	FALSE
1122	YESphlox-TSA1000	0.989499	-0.0152296	0.999379	-0.000895608	0.98954	-0.01517	0.997925	-0.00299657	14	0.0817242	0.426782	0.369794	0.0201127	FALSE
1122	YESphlox-TSA500	0.999719	-0.000405773	1.0097	0.0139282	1.0031	0.0044652	1.0116	0.0166386	14	0.974911	0.993499	0.00283246	0.0323795	FALSE
1122	YESphlox-TeaTree1	1.00209	0.00300778	1.01209	0.0173418	1.01163	0.0166823	1.0202	0.0288557	12	0.73541	0.871444	0.0597603	0.0200382	FALSE
1122	YESphlox-TeaTree10	1.00267	0.0038445	1.01268	0.0181785	1.0076	0.0109259	1.01614	0.0230993	12	0.660744	0.87182	0.0595734	0.0196619	FALSE
1122	YESphlox-TeaTree100	0.997283	-0.00392538	1.00724	0.0104086	0.993325	-0.00966188	1.00174	0.00251152	12	0.5675	0.951799	0.0214546	0.0147854	FALSE
1122	YESphlox-Temp25	1.00189	0.00272537	1.01189	0.0170594	1.0024	0.00345943	1.01089	0.0156328	14	0.834498	0.941314	0.0262656	0.0327627	FALSE
1122	YESphlox-Temp25Gluc0.1	0.998538	-0.00211028	1.00851	0.0122237	0.994563	-0.007865	1.00299	0.00430839	24	0.792791	0.853194	0.0689521	0.0255191	FALSE
1122	YESphlox-Temp25Gluc0.5	0.990989	-0.0130597	1.00088	0.00127426	1.00104	0.0014996	1.00952	0.013673	24	0.17507	0.412144	0.384951	0.0305485	FALSE
1122	YESphlox-Temp25Gluc1	0.998359	-0.00236987	1.00833	0.0119641	1.00264	0.00379906	1.01113	0.0159725	28	0.833135	0.903093	0.0442676	0.0399424	FALSE
1122	YESphlox-Temp25Gluc3	0.998698	-0.0018802	1.00867	0.0124538	1.00085	0.00122745	1.00933	0.0134009	14	0.849021	0.96905	0.0136538	0.0243311	FALSE
1122	YESphlox-Tuni20	0.993908	-0.00881611	1.00383	0.00551789	1.00101	0.00145678	1.00949	0.0136302	13	0.779754	0.922873	0.0348582	0.0772727	FALSE
1122	YESphlox-Tuni40	1.0204	0.0291419	1.03059	0.0434759	0.997906	-0.00302443	1.00636	0.00914896	11	0.454626	0.763737	0.117056	0.0876593	FALSE
1122	YESphlox-Tuni60	1.02177	0.0310698	1.03197	0.0454038	1.09374	0.129263	1.103	0.141437	5	0.773169	0.977931	0.00969185	0.15937	FALSE
1122	YESphlox-Tuni80	0.986247	-0.0199794	0.996095	-0.00564541	0.996193	-0.00550269	1.00463	0.00667071	10	0.606126	0.880822	0.0551119	0.0820197	FALSE
1122	YESphlox-VPA10	0.992052	-0.0115127	1.00196	0.00282133	0.994844	-0.00745719	1.00327	0.00471621	10	0.578006	0.749267	0.125363	0.0436072	FALSE
1122	YESphlox-VPA8	1.00175	0.00252743	1.01176	0.0168614	1.00382	0.00550334	1.01233	0.0176767	9	0.903822	0.961573	0.0170179	0.0422364	FALSE
1122	YESphlox-Xylose2	0.980016	-0.0291231	0.989801	-0.0147891	0.985782	-0.0206596	0.994135	-0.00848616	9	0.142774	0.603312	0.219458	0.0369866	FALSE
1122	Yesphlox-Caffeine10	1.00863	0.0124041	1.01871	0.0267381	0.983257	-0.0243593	0.991589	-0.0121859	21	0.705373	0.930603	0.0312354	0.103833	FALSE
1122	Yesphlox-DMSO	0.988708	-0.0163834	0.99858	-0.00204945	0.993183	-0.00986781	1.0016	0.00230559	24	0.414482	0.908621	0.0416172	0.0665815	FALSE
1122	Yesphlox-Gal2	0.983825	-0.0235268	0.993648	-0.00919283	0.991598	-0.0121734	1	0	24	0.20371	0.567192	0.24627	0.0604969	FALSE
1122	Yesphlox-Rapa1	1.0218	0.0311064	1.032	0.0454404	1.0189	0.0270078	1.02753	0.0391812	21	0.173893	0.742248	0.129451	0.071053	FALSE
1122	Yesphlox-Rapa100	1.00634	0.00912374	1.01639	0.0234577	1.00198	0.00284782	1.01047	0.0150212	24	0.669639	0.847351	0.0719367	0.0720204	FALSE
1122	Yesphlox-Sorb1.2	1.0015	0.00216831	1.0115	0.0165023	0.997027	-0.00429529	1.00548	0.00787811	21	0.908467	0.971771	0.012436	0.0591338	FALSE
1122	Yesphlox-Torin5	1.03256	0.0462198	1.04287	0.0605538	1.00024	0.000341366	1.00871	0.0125148	24	0.249357	0.70431	0.152236	0.135995	FALSE
1125	EMM-3AT4	0.991949	-0.0116623	1.00979	0.0140577	0.996611	-0.00489688	1.01827	0.0261205	12	0.522606	0.826728	0.0826375	0.0393321	FALSE
1125	EMM-3AT6	0.996824	-0.00458949	1.01475	0.0211305	0.997887	-0.0030523	1.01957	0.027965	12	0.713566	0.917319	0.0374795	0.0238808	FALSE
1125	EMM-Bleo200	0.986623	-0.0194297	1.00437	0.00629033	0.989648	-0.0150123	1.01116	0.0160051	12	0.141075	0.382917	0.416895	0.0249307	FALSE
1125	EMM-Canav60	1.00163	0.00234316	1.01964	0.0280632	0.997111	-0.0041738	1.01878	0.0268435	12	0.92551	0.990485	0.00415198	0.0572647	FALSE
1125	EMM-Cys	0.992818	-0.0103984	1.01068	0.0153216	0.99176	-0.0119365	1.01331	0.0190808	24	0.598676	0.808184	0.0924897	0.0621005	FALSE
1125	EMM-Met	0.988456	-0.0167519	1.00624	0.00896807	0.99176	-0.0119371	1.01331	0.0190802	24	0.401495	0.779826	0.108003	0.0624585	FALSE
1125	EMMphlox-Act0.1	0.982596	-0.0253297	1.00398	0.00573433	0.979625	-0.0296988	1.00177	0.0025525	16	0.0539502	0.450643	0.346167	0.0287024	FALSE
1125	EMMphlox-Act1	1.00047	0.000683876	1.02225	0.0317479	1.00346	0.00498057	1.02614	0.0372319	16	0.97123	0.997491	0.00109116	0.0487788	FALSE
1125	EMMphlox-Act2	1.00298	0.00428779	1.02481	0.0353518	1.00371	0.00534367	1.0264	0.037595	16	0.830133	0.972997	0.0118884	0.0519036	FALSE
1125	EMMphlox-Cana75	0.981523	-0.0269063	1.00289	0.00415781	0.980379	-0.0285883	1.00254	0.00366304	24	0.00837545	0.132146	0.878946	0.022176	FALSE
1125	EMMphlox-EtOH0.1	0.99566	-0.00627553	1.01733	0.0247885	0.994923	-0.00734318	1.01741	0.0249081	16	0.785833	0.931713	0.0307178	0.0608466	FALSE
1125	YES-Bleo200	0.996777	-0.00465725	1.00818	0.0117466	1.00187	0.00269529	1.01352	0.0193747	12	0.696826	0.9237	0.034469	0.0272923	FALSE
1125	YES-Bleo300	1.00595	0.00855525	1.01745	0.0249591	1.00913	0.0131162	1.02087	0.0297957	4	0.715634	0.927189	0.0328319	0.0298406	FALSE
1125	YES-Bleo600	1.0143	0.0204779	1.02589	0.0368817	1.01018	0.0146062	1.02192	0.0312856	8	0.153041	0.545209	0.263437	0.0251048	FALSE
1125	YES-Bortezomib100	0.998643	-0.00195842	1.01006	0.0144454	1.00067	0.000959602	1.0123	0.017639	11	0.925494	0.949392	0.0225543	0.0469435	FALSE
1125	YES-Bortezomib200	1.00973	0.0139748	1.02128	0.0303786	1.00899	0.0129186	1.02073	0.0295981	12	0.0975208	0.30047	0.522199	0.0177651	FALSE
1125	YES-Bref60	1.00988	0.0141888	1.02143	0.0305926	1.01844	0.0263667	1.03029	0.0430462	12	0.851143	0.918342	0.0369957	0.180092	FALSE
1125	YES-Calco10KCl0.5	0.991377	-0.0124937	1.00271	0.00391016	1.00152	0.00219489	1.01317	0.0188743	12	0.39537	0.744339	0.128229	0.0334339	FALSE
1125	YES-Calco2	1.00372	0.00535405	1.0152	0.0217579	1.00494	0.00710322	1.01662	0.0237827	12	0.616161	0.850958	0.070092	0.0242074	FALSE
1125	YES-Calco4KCl0.5	1.00288	0.004148	1.01435	0.0205519	1.00646	0.00929331	1.01817	0.0259728	12	0.827893	0.951331	0.0216685	0.0447271	FALSE
1125	YES-Cana120	0.991197	-0.0127564	1.00253	0.00364745	0.998381	-0.00233727	1.00999	0.0143422	12	0.283036	0.647074	0.189046	0.0264575	FALSE
1125	YES-Cana60	0.997111	-0.00417332	1.00851	0.0122305	0.994377	-0.00813475	1.00594	0.00854468	12	0.625891	0.77556	0.110384	0.0188483	FALSE
1125	YES-CoCl0.25	0.997176	-0.00408031	1.00858	0.0123235	0.995061	-0.00714363	1.00663	0.00953581	12	0.78073	0.967426	0.0143822	0.0339215	FALSE
1125	YES-CoCl5	0.992699	-0.0105711	1.00405	0.00583278	1.00005	7.4928e-05	1.01168	0.0167544	12	0.258208	0.525637	0.279314	0.0203417	FALSE
1125	YES-Cycloh100	1.00818	0.0117532	1.01971	0.028157	1.00554	0.00797312	1.01723	0.0246526	12	0.301352	0.826745	0.0826284	0.0255185	FALSE
1125	YES-Cycloh200	1.00628	0.00903448	1.01779	0.0254383	1.0046	0.00662582	1.01629	0.0233053	12	0.221616	0.682818	0.165695	0.0155773	FALSE
1125	YES-Cycloh400	1.01331	0.0190806	1.0249	0.0354845	1.00888	0.0127599	1.02062	0.0294394	12	0.211429	0.547795	0.261382	0.0345209	FALSE
1125	YES-Cycloh600	1.01254	0.0179809	1.02412	0.0343848	1.00878	0.0126082	1.02051	0.0292877	12	0.0822443	0.468793	0.329019	0.022166	FALSE
1125	YES-Dhcumarin100	0.983561	-0.0239138	0.994808	-0.00750989	0.978961	-0.0306772	0.990344	-0.0139978	12	0.0720931	0.416508	0.380377	0.0283431	FALSE
1125	YES-Dhcumarin200	1.01036	0.0148719	1.02192	0.0312757	1.00374	0.00538261	1.01541	0.022062	11	0.362312	0.682123	0.166137	0.0358144	FALSE
1125	YES-Dhcumarin50	0.999908	-0.000132977	1.01134	0.0162709	0.997879	-0.00306297	1.00948	0.0136165	12	0.985263	0.993982	0.0026214	0.0154509	FALSE
1125	YES-EDTA0.1	1.01995	0.0285014	1.03162	0.0449052	1.00149	0.00215342	1.01314	0.0188329	12	0.0826718	0.554387	0.256187	0.0361275	FALSE
1125	YES-EDTA0.3	1.02632	0.0374856	1.03806	0.0538895	1.00983	0.0141194	1.02158	0.0307989	12	0.0502448	0.347216	0.459401	0.0415916	FALSE
1125	YES-EDTA0.6	1.00082	0.00118927	1.01227	0.0175931	0.988464	-0.0167393	0.999959	-5.98146e-05	12	0.942483	0.967955	0.0141448	0.0384631	FALSE
1125	YES-EtOH5	0.997167	-0.0040929	1.00857	0.012311	1.00383	0.00551266	1.0155	0.0221921	12	0.769777	0.971301	0.0126463	0.0322847	FALSE
1125	YES-Forma2	0.997341	-0.00384081	1.00875	0.0125631	1.00366	0.00527538	1.01533	0.0219548	12	0.749033	0.92815	0.032382	0.0274572	FALSE
1125	YES-Forma3	1.0042	0.00604483	1.01568	0.0224487	1.0047	0.00676839	1.01639	0.0234478	12	0.596932	0.808308	0.0924232	0.0260448	FALSE
1125	YES-HU30	1.00166	0.00238878	1.01311	0.0187926	0.99725	-0.00397306	1.00885	0.0127064	12	0.797905	0.896282	0.0475554	0.0209055	FALSE
1125	YES-HU45	0.999058	-0.00136036	1.01048	0.0150435	1.00216	0.00311344	1.01381	0.0197929	12	0.932618	0.972933	0.0119169	0.0374738	FALSE
1125	YES-KCl0.5SDS0.01	0.987815	-0.0176871	0.999111	-0.00128328	0.994126	-0.00849914	1.00569	0.0081803	12	0.218645	0.484275	0.314908	0.0320359	FALSE
1125	YES-KCl1SDS0.01	0.968824	-0.0456929	0.979903	-0.0292891	0.974685	-0.0369917	0.986019	-0.0203123	12	0.183841	0.487929	0.311643	0.0767445	FALSE
1125	YES-Ovana3	1.0687	0.0958625	1.08092	0.112266	1.0559	0.0784712	1.06818	0.0951507	7	0.055732	0.492329	0.307745	0.0776492	FALSE
1125	YES-Ovana6	1.02386	0.0340137	1.03556	0.0504176	1.03096	0.0439826	1.04294	0.060662	6	0.445071	0.734758	0.133856	0.0711955	FALSE
1125	YES-SDS0.01	0.996876	-0.0045134	1.00828	0.0118905	1.0044	0.00633163	1.01608	0.0230111	15	0.798585	0.851999	0.0695611	0.0463268	FALSE
1125	YES-SDS0.02	0.966769	-0.0487565	0.977824	-0.0323527	1.0251	0.0357709	1.03702	0.0524504	10	0.413519	0.589265	0.22969	0.123819	FALSE
1125	YES-TBH15	1.19091	0.25207	1.20453	0.268474	1.05291	0.0743875	1.06516	0.0910669	8	0.320124	0.789972	0.102388	0.510409	FALSE
1125	YES-UV1000	0.964699	-0.0518495	0.97573	-0.0354457	0.974837	-0.0367675	0.986172	-0.0200881	12	0.476068	0.916348	0.0379396	0.167487	FALSE
1125	YES-UV10m	0.999884	-0.000167808	1.01132	0.0162361	0.999419	-0.000838117	1.01104	0.0158413	12	0.993575	0.998082	0.000833937	0.0489347	FALSE
1125	YES-UV2000	1.0106	0.0152137	1.02216	0.0316176	1.00732	0.0105279	1.01904	0.0272073	12	0.372177	0.738614	0.131582	0.0393146	FALSE
1125	YES-UV20m	0.995522	-0.00647524	1.00691	0.00992862	1.00992	0.0142459	1.02167	0.0309254	12	0.724018	0.953685	0.0205949	0.0427057	FALSE
1125	YES-UV3000	0.989127	-0.015773	1.00044	0.000630898	1.00384	0.00552988	1.01551	0.0222093	12	0.254832	0.926811	0.0330089	0.0309813	FALSE
1125	YES-UV4000	0.994136	-0.00848493	1.0055	0.00791894	0.988505	-0.0166794	1	0	6	0.304859	0.710853	0.14822	0.0119996	FALSE
1125	YES-UV5m	1.07706	0.1071	1.08938	0.123504	1.02094	0.0298995	1.03281	0.0465789	12	0.266989	0.648273	0.188242	0.230805	FALSE
1125	YES-UV6000	0.988877	-0.0161377	1.00018	0.000266126	0.989832	-0.0147448	1.00134	0.00193467	12	0.317803	0.662784	0.178628	0.0366026	FALSE
1125	YES-UV9000	0.996914	-0.00445853	1.00831	0.0119453	0.992577	-0.0107492	1.00412	0.00593025	12	0.733577	0.921605	0.035455	0.0301087	FALSE
1125	YES-VPA5	0.993956	-0.00874681	1.00532	0.00765706	0.992298	-0.011154	1.00384	0.00552545	12	0.482904	0.724356	0.140048	0.028289	FALSE
1125	YESphlox-Act0.1	1.02525	0.0359688	1.03902	0.0552242	1.00922	0.0132468	1.02095	0.0299166	16	0.225585	0.824511	0.0838034	0.0805641	FALSE
1125	YESphlox-Act1	1.02467	0.0351594	1.03844	0.0544148	1.02408	0.034335	1.03599	0.0510048	16	0.218377	0.913949	0.0390778	0.0774172	FALSE
1125	YESphlox-Act2	1.0187	0.0267225	1.03238	0.0459779	1.00081	0.00116782	1.01244	0.0178376	16	0.271555	0.780951	0.107376	0.0658774	FALSE
1125	YESphlox-stationary7	0.996478	-0.00509022	1.00987	0.0141652	0.996622	-0.00488222	1.0082	0.0117875	24	0.439656	0.880436	0.055302	0.0195381	FALSE
1125	YESphlox-Benza12	0.995488	-0.00652489	1.00886	0.0127305	0.994191	-0.00840576	1.00574	0.00826401	12	0.522833	0.872188	0.0593898	0.0228804	FALSE
1125	YESphlox-Benza4	1.00043	0.000621759	1.01387	0.0198772	1.00158	0.00227108	1.01322	0.0189409	12	0.961174	0.961174	0.017198	0.029473	FALSE
1125	YESphlox-Benza8	1.00214	0.00308532	1.01561	0.0223407	0.998416	-0.00228761	1.01002	0.0143822	12	0.812733	0.918102	0.0371093	0.0300812	FALSE
1125	YESphlox-Bort500	1.01086	0.0155815	1.02444	0.0348369	1.00168	0.0024192	1.01332	0.019089	12	0.366381	0.600553	0.221449	0.0398432	FALSE
1125	YESphlox-CdCl1	0.975378	-0.0359664	0.988484	-0.016711	0.966489	-0.0491752	0.977721	-0.0325055	6	0.82095	0.936171	0.0286448	0.256213	FALSE
1125	YESphlox-Diamide2	0.979882	-0.0293197	0.993048	-0.0100643	0.980034	-0.0290957	0.991424	-0.0124259	12	0.156359	0.658613	0.18137	0.0459575	FALSE
1125	YESphlox-Diamide3	1.01594	0.0228212	1.02959	0.0420767	1.02572	0.0366379	1.03764	0.0533077	12	0.204102	0.517705	0.285918	0.04091	FALSE
1125	YESphlox-Diamide3.5	0.996802	-0.00462097	1.0102	0.0146344	1.0019	0.00273807	1.01354	0.0194078	12	0.739257	0.896546	0.0474273	0.0320543	FALSE
1125	YESphlox-EDTA4	1.05056	0.0711553	1.06467	0.0904107	1.0347	0.0492188	1.04673	0.0658886	12	0.0533026	0.357441	0.446796	0.0818145	FALSE
1125	YESphlox-EGTA1	1.00207	0.00298729	1.01554	0.0222427	0.999327	-0.000970731	1.01094	0.015699	12	0.817829	0.98026	0.00865871	0.0299487	FALSE
1125	YESphlox-EGTA10	1.02475	0.0352757	1.03852	0.0545311	1.01227	0.0175928	1.02403	0.0342626	12	0.271837	0.553442	0.256928	0.0747992	FALSE
1125	YESphlox-EGTA15	1.05604	0.0786666	1.07023	0.097922	1.06701	0.0935685	1.07941	0.110238	8	0.136863	0.948266	0.02307	0.0955211	FALSE
1125	YESphlox-EGTA5	0.998316	-0.00243128	1.01173	0.0168241	0.996874	-0.00451746	1.00846	0.0121523	11	0.831612	0.96353	0.0161349	0.0249572	FALSE
1125	YESphlox-EtOH0.1	1.01444	0.0206769	1.02807	0.0399324	1.00975	0.0140016	1.02149	0.0306713	16	0.286799	0.794876	0.0997004	0.0523337	FALSE
1125	YESphlox-EtOH10	0.986626	-0.0194252	0.999882	-0.000169781	0.988512	-0.0166698	1	0	11	0.483285	0.956864	0.0191498	0.0613666	FALSE
1125	YESphlox-Forma2.5	1.00432	0.00621885	1.01781	0.0254743	1.01291	0.0185064	1.02468	0.0351761	11	0.478576	0.784642	0.105329	0.01849	FALSE
1125	YESphlox-Gluc0.1stationary7	0.996346	-0.0052813	1.00973	0.0139741	0.998728	-0.0018363	1.01033	0.0148335	24	0.645765	0.82962	0.081121	0.0374596	FALSE
1125	YESphlox-Gluc0.5stationary7	0.998363	-0.00236295	1.01178	0.0168925	1.00041	0.000597536	1.01204	0.0172673	48	0.737006	0.816488	0.0880504	0.0303652	FALSE
1125	YESphlox-Gluc1stationary7	0.998594	-0.00203025	1.01201	0.0172252	1.0019	0.00274348	1.01355	0.0194133	20	0.76045	0.877917	0.0565463	0.0181558	FALSE
1125	YESphlox-Glycerol2	0.995882	-0.00595305	1.00926	0.0133024	0.997573	-0.00350517	1.00917	0.0131646	12	0.550716	0.832803	0.0794577	0.0223301	FALSE
1125	YESphlox-Glycerol2MMS0.0075	0.994539	-0.00790012	1.0079	0.0113553	0.982071	-0.0261005	0.993484	-0.00943074	12	0.719211	0.889377	0.050914	0.0514501	FALSE
1125	YESphlox-Glycerol3	1.00879	0.0126274	1.02235	0.0318828	1.01364	0.0195393	1.02542	0.0362091	12	0.0906066	0.526985	0.278202	0.0153763	FALSE
1125	YESphlox-Glycerol3MMS0.005	1.00311	0.00448073	1.01659	0.0237361	1.0034	0.00489032	1.01506	0.0215601	12	0.710842	0.81036	0.0913222	0.0277458	FALSE
1125	YESphlox-HP10	1.00236	0.00339699	1.01583	0.0226524	1.01518	0.0217406	1.02698	0.0384104	32	0.938417	0.976151	0.0104831	0.173064	FALSE
1125	YESphlox-HP15	1.06068	0.0849863	1.07493	0.104242	0.964165	-0.0526479	0.97537	-0.0359781	8	0.592375	0.833713	0.0789837	0.31005	FALSE
1125	YESphlox-HP2	0.990522	-0.0137395	1.00383	0.00551594	0.989626	-0.0150443	1.00113	0.00162543	24	0.204778	0.660927	0.179846	0.0345459	FALSE
1125	YESphlox-HP4	0.993574	-0.00930118	1.00692	0.00995422	0.992747	-0.0105022	1.00428	0.00616753	36	0.341922	0.587921	0.230681	0.0383961	FALSE
1125	YESphlox-HP6	1.01993	0.0284713	1.03363	0.0477268	1.01659	0.0237445	1.02841	0.0404143	36	0.0653948	0.29019	0.537318	0.0624634	FALSE
1125	YESphlox-HP8	1.06797	0.09487	1.08232	0.114125	1.0278	0.0395606	1.03975	0.0562304	36	0.116766	0.607266	0.216621	0.25667	FALSE
1125	YESphlox-HU8	0.98529	-0.0213798	0.998529	-0.00212443	0.983048	-0.0246668	0.994472	-0.00799705	12	0.227319	0.439227	0.357311	0.0398105	FALSE
1125	YESphlox-HU8MMS0.075	0.995384	-0.00667425	1.00876	0.0125812	0.998249	-0.00252805	1.00985	0.0141417	12	0.803199	0.968538	0.0138834	0.0630392	FALSE
1125	YESphlox-KCl0.5	0.999399	-0.00086765	1.01283	0.0183878	1.00566	0.00813943	1.01735	0.0248092	12	0.945356	0.953722	0.0205784	0.0291776	FALSE
1125	YESphlox-KCl0.5SDS0.004	1.00944	0.013551	1.023	0.0328064	1.01737	0.0248417	1.02919	0.0415115	12	0.500275	0.781252	0.107209	0.0469833	FALSE
1125	YESphlox-KCl1	0.98985	-0.0147185	1.00315	0.00453696	0.985961	-0.0203972	0.99742	-0.00372738	12	0.0899016	0.366028	0.436486	0.0181008	FALSE
1125	YESphlox-LiCl4	0.991813	-0.0118599	1.00514	0.00739548	0.991923	-0.0116997	1.00345	0.00497011	12	0.168541	0.600427	0.22154	0.0183135	FALSE
1125	YESphlox-LiCl6	0.989669	-0.0149817	1.00297	0.00427375	0.987282	-0.0184665	0.998755	-0.00179678	12	0.156323	0.395408	0.402954	0.0229006	FALSE
1125	YESphlox-MMS0.005	1.00053	0.000766683	1.01398	0.0200221	0.990965	-0.0130946	1.00248	0.00357514	12	0.957972	0.992808	0.00313494	0.0338157	FALSE
1125	YESphlox-MMS0.075	0.991293	-0.0126171	1.00461	0.00663831	0.985302	-0.0213624	0.996753	-0.00469263	24	0.401619	0.526259	0.2788	0.049478	FALSE
1125	YESphlox-NaCl150	0.995222	-0.00690953	1.00859	0.0123459	0.988512	-0.0166698	1	0	12	0.487939	0.877703	0.0566524	0.0222273	FALSE
1125	YESphlox-NaCl150MMS0.005	0.985755	-0.0206995	0.999	-0.00144408	0.987625	-0.0179642	0.999103	-0.00129446	12	0.0202148	0.177268	0.75137	0.0177211	FALSE
1125	YESphlox-Ovana0.5	1.00366	0.00526488	1.01714	0.0245203	1.00484	0.00696476	1.01652	0.0236345	12	0.646916	0.958345	0.0184781	0.0262545	FALSE
1125	YESphlox-Ovana1	0.992652	-0.0106394	1.00599	0.00861602	0.992246	-0.0112308	1.00378	0.00543897	11	0.458402	0.769228	0.113945	0.0312875	FALSE
1125	YESphlox-Ovana4	1.03568	0.0505729	1.04959	0.0698283	1.00652	0.00937899	1.01822	0.0260488	11	0.221886	0.851387	0.0698728	0.0918322	FALSE
1125	YESphlox-Phloxine2	1.0108	0.0154942	1.02438	0.0347496	1.01163	0.0166763	1.02338	0.0333461	12	0.269443	0.907081	0.0423539	0.0318535	FALSE
1125	YESphlox-Phloxine2HP10	1.05233	0.0735925	1.06647	0.0928479	1.03471	0.0492216	1.04673	0.0658914	12	0.0682596	0.316372	0.499802	0.0907048	FALSE
1125	YESphlox-Phloxine2HP15	1.17328	0.230542	1.18904	0.249797	1.14113	0.190469	1.1544	0.207138	8	0.112637	0.504613	0.297041	0.27385	FALSE
1125	YESphlox-SDS0.004	0.987542	-0.0180861	1.00081	0.00116931	0.988691	-0.0164081	1.00018	0.000261712	12	0.0633076	0.575487	0.239964	0.0203123	FALSE
1125	YESphlox-TBH1	0.994892	-0.00738793	1.00826	0.0118675	0.997557	-0.00352838	1.00915	0.0131414	12	0.334665	0.511942	0.290779	0.0162965	FALSE
1125	YESphlox-TBH1.5	0.986074	-0.0202325	0.999323	-0.000977098	0.967903	-0.0470653	0.979152	-0.0303955	8	0.611575	0.817889	0.0873056	0.0749004	FALSE
1125	YESphlox-TSA1000	1.00781	0.0112269	1.02135	0.0304823	0.999606	-0.000568923	1.01122	0.0161008	12	0.455785	0.784202	0.105572	0.0347443	FALSE
1125	YESphlox-TSA500	1.01727	0.0246986	1.03094	0.043954	1.01332	0.0190839	1.02509	0.0357536	12	0.200548	0.543049	0.265161	0.0440106	FALSE
1125	YESphlox-TeaTree1	1.01732	0.0247711	1.03099	0.0440265	1.01781	0.0254659	1.02964	0.0421357	12	0.00897466	0.247201	0.60695	0.0187406	FALSE
1125	YESphlox-TeaTree10	0.997099	-0.00419115	1.0105	0.0150643	0.999404	-0.000860002	1.01102	0.0158098	12	0.641241	0.87182	0.0595734	0.0199508	FALSE
1125	YESphlox-TeaTree100	0.998822	-0.00170093	1.01224	0.0175545	1.0015	0.00215695	1.01314	0.0188267	12	0.895585	0.996885	0.00135484	0.0298993	FALSE
1125	YESphlox-Temp25	1.00488	0.00702965	1.01839	0.0262851	1.00223	0.00321168	1.01388	0.0198814	12	0.563449	0.87442	0.0582801	0.0278533	FALSE
1125	YESphlox-Temp25Gluc0.1	0.995949	-0.00585666	1.00933	0.0133987	0.995836	-0.00601998	1.00741	0.0106498	24	0.742426	0.822492	0.0848683	0.059517	FALSE
1125	YESphlox-Temp25Gluc0.5	1.00235	0.00338663	1.01582	0.022642	0.999062	-0.00135384	1.01067	0.0153159	24	0.762108	0.879492	0.0557679	0.0365562	FALSE
1125	YESphlox-Temp25Gluc1	1.0181	0.0258784	1.03178	0.0451338	1.02128	0.0303829	1.03315	0.0470526	24	0.00789782	0.0560745	1.25123	0.0295817	FALSE
1125	YESphlox-Temp25Gluc3	1.00476	0.00684985	1.01826	0.0261053	1.00461	0.0066287	1.01628	0.0232985	12	0.437305	0.909428	0.0412317	0.0194412	FALSE
1125	YESphlox-Tuni20	1.02567	0.0365653	1.03945	0.0558207	1.04636	0.0653736	1.05852	0.0820434	8	0.416633	0.826857	0.0825695	0.0850654	FALSE
1125	YESphlox-Tuni40	0.993003	-0.0101296	1.00635	0.00912585	0.996005	-0.00577511	1.00758	0.0108947	9	0.77757	0.894206	0.0485625	0.0725325	FALSE
1125	YESphlox-Tuni60	0.971328	-0.0419693	0.984379	-0.0227139	0.973071	-0.0393837	0.984379	-0.0227139	2	0.8285	0.977931	0.00969185	0.148827	FALSE
1125	YESphlox-Tuni80	1.04783	0.067406	1.06191	0.0866614	1.06156	0.08618	1.07389	0.10285	9	0.085474	0.742556	0.129271	0.0740061	FALSE
1125	YESphlox-VPA10	1.04012	0.0567556	1.0541	0.0760111	1.00319	0.00459068	1.01485	0.0212605	9	0.135578	0.402366	0.395379	0.0733349	FALSE
1125	YESphlox-VPA8	0.998972	-0.00148318	1.01239	0.0177722	0.996339	-0.00529196	1.00792	0.0113778	10	0.972484	0.991927	0.00352027	0.0926138	FALSE
1125	YESphlox-Xylose2	0.999198	-0.00115681	1.01262	0.0180986	1.00362	0.00521675	1.01529	0.0218865	8	0.956105	0.964566	0.0156679	0.0398474	FALSE
1125	Yesphlox-Caffeine10	0.985274	-0.0214038	0.998512	-0.00214834	0.979512	-0.0298647	0.990896	-0.0131949	16	0.605703	0.910541	0.0407005	0.112891	FALSE
1125	Yesphlox-DMSO	1.03541	0.0501964	1.04932	0.0694518	1.01482	0.021226	1.02662	0.0378958	16	0.0586891	0.79323	0.100601	0.0697585	FALSE
1125	Yesphlox-Gal2	1.02104	0.0300362	1.03476	0.0492916	0.985131	-0.0216118	0.99658	-0.00494205	16	0.466238	0.716685	0.144672	0.113753	FALSE
1125	Yesphlox-Rapa1	1.0369	0.0522799	1.05083	0.0715353	0.996331	-0.00530262	1.00791	0.0113672	12	0.319618	0.829294	0.0812912	0.124092	FALSE
1125	Yesphlox-Rapa100	1.0578	0.0810714	1.07202	0.100327	1.05696	0.0799178	1.06924	0.0965876	16	0.015188	0.317839	0.497792	0.0852851	FALSE
1125	Yesphlox-Sorb1.2	0.999883	-0.000168392	1.01332	0.019087	1.00428	0.00615994	1.01595	0.0228297	12	0.990504	0.998575	0.000619509	0.0328299	FALSE
1125	Yesphlox-Torin5	1.05299	0.074492	1.06714	0.0937475	1.07943	0.110275	1.09198	0.126945	16	0.0531133	0.313491	0.503775	0.102059	FALSE
1130	EMM-3AT4	1.00283	0.00408252	1.0092	0.0132094	0.991807	-0.0118694	1.00803	0.0115391	11	0.789383	0.936567	0.0284612	0.0189957	FALSE
1130	EMM-3AT6	0.980188	-0.0288699	0.986408	-0.019743	0.990597	-0.0136294	1.0068	0.00977907	12	0.586189	0.903752	0.0439507	0.119662	FALSE
1130	EMM-Bleo200	1.0141	0.0201931	1.02053	0.02932	1.01224	0.0175476	1.0288	0.0409561	12	0.184883	0.417433	0.379413	0.0194529	FALSE
1130	EMM-Canav60	1.00921	0.0132281	1.01562	0.022355	0.994401	-0.00810022	1.01067	0.0153083	12	0.416554	0.885251	0.0529336	0.0239735	FALSE
1130	EMM-Cys	0.997659	-0.00338104	1.00399	0.00574581	0.98996	-0.0145585	1.00615	0.00884997	22	0.862236	0.924116	0.0342737	0.0474805	FALSE
1130	EMM-Met	0.985284	-0.0213885	0.991537	-0.0122617	0.986649	-0.0193909	1.00279	0.00401756	24	0.356059	0.779826	0.108003	0.0642812	FALSE
1130	EMMphlox-Act0.1	1.00081	0.00116915	1.02644	0.0376451	1.00911	0.0130765	1.02576	0.0366994	16	0.923407	0.957692	0.018774	0.0240722	FALSE
1130	EMMphlox-Act1	1.00392	0.00564805	1.02963	0.042124	1.00723	0.0103878	1.02385	0.0340108	16	0.678551	0.900508	0.0455126	0.0296599	FALSE
1130	EMMphlox-Act2	1.0317	0.045019	1.05811	0.081495	1.042	0.05936	1.05921	0.082983	16	0.102296	0.691714	0.160074	0.071574	FALSE
1130	EMMphlox-Cana75	0.993881	-0.00885458	1.01933	0.0276214	0.998483	-0.00218996	1.01497	0.021433	24	0.359805	0.615854	0.210523	0.0142281	FALSE
1130	EMMphlox-EtOH0.1	1.01216	0.0174407	1.03808	0.0539166	1.01256	0.0180015	1.02927	0.0416245	15	0.294329	0.855105	0.0679805	0.0383392	FALSE
1130	YES-Bleo200	1.00705	0.0101401	1.02373	0.033842	1.0072	0.0103456	1.0246	0.0350559	12	0.11788	0.569948	0.244165	0.0138868	FALSE
1130	YES-Bleo300	1.01694	0.0242389	1.03379	0.0479408	1.01167	0.0167362	1.02915	0.0414465	4	0.309483	0.927189	0.0328319	0.0281844	FALSE
1130	YES-Bleo600	1.0018	0.00259425	1.01839	0.0262962	0.989617	-0.0150581	1.00671	0.00965215	8	0.867868	0.952483	0.0211428	0.029691	FALSE
1130	YES-Bortezomib100	1.0125	0.0179238	1.02927	0.0416257	1.00807	0.0115947	1.02548	0.036305	12	0.0636109	0.345316	0.461783	0.0209225	FALSE
1130	YES-Bortezomib200	1.00975	0.0140035	1.02648	0.0377055	1.00887	0.0127383	1.0263	0.0374486	12	0.137764	0.356935	0.447411	0.020947	FALSE
1130	YES-Bref60	0.928289	-0.107353	0.943666	-0.0836514	0.907741	-0.139648	0.923422	-0.114937	12	0.030989	0.131924	0.879677	0.102074	FALSE
1130	YES-Calco10KCl0.5	0.99904	-0.00138572	1.01559	0.0223162	1.00122	0.0017648	1.01852	0.0264751	12	0.900484	0.92937	0.0318113	0.0258809	FALSE
1130	YES-Calco2	1.00528	0.00759814	1.02193	0.0313001	1.00647	0.00929812	1.02385	0.0340084	12	0.552305	0.817147	0.0876999	0.0298818	FALSE
1130	YES-Calco4KCl0.5	0.999264	-0.0010629	1.01582	0.022639	0.999604	-0.000571384	1.01687	0.0241389	12	0.890684	0.957905	0.0186774	0.017657	FALSE
1130	YES-Cana120	0.996207	-0.005483	1.01271	0.0182189	0.996169	-0.00553794	1.01338	0.0191724	12	0.689183	0.833444	0.0791238	0.0320971	FALSE
1130	YES-Cana60	1.01041	0.0149396	1.02715	0.0386415	1.00163	0.00234349	1.01893	0.0270538	12	0.296488	0.560409	0.251495	0.0330704	FALSE
1130	YES-CoCl0.25	0.997374	-0.00379385	1.01389	0.0199081	1.00059	0.00085492	1.01788	0.0255652	12	0.665802	0.946639	0.0238155	0.0201643	FALSE
1130	YES-CoCl5	0.996256	-0.00541139	1.01276	0.0182905	0.998875	-0.00162411	1.01613	0.0230862	12	0.446925	0.661681	0.179351	0.0158975	FALSE
1130	YES-Cycloh100	0.997158	-0.0041067	1.01368	0.0195952	0.991002	-0.0130408	1.00812	0.0116695	12	0.611236	0.954533	0.020209	0.0184002	FALSE
1130	YES-Cycloh200	1.00233	0.00336115	1.01894	0.0270631	1.00523	0.00752193	1.02259	0.0322322	12	0.665496	0.968433	0.0139306	0.0177248	FALSE
1130	YES-Cycloh400	1.0032	0.00460274	1.01981	0.0283047	0.998497	-0.00216967	1.01575	0.0225406	12	0.611744	0.830223	0.080805	0.0208926	FALSE
1130	YES-Cycloh600	0.993323	-0.00966569	1.00978	0.0140362	0.992508	-0.0108495	1.00965	0.0138608	12	0.0566507	0.430546	0.365981	0.0101412	FALSE
1130	YES-Dhcumarin100	1.01053	0.0151161	1.02727	0.0388181	1.0099	0.0142113	1.02735	0.0389216	12	0.0903809	0.429309	0.36723	0.0194806	FALSE
1130	YES-Dhcumarin200	0.996259	-0.0054076	1.01276	0.0182943	0.99339	-0.00956815	1.01055	0.0151421	11	0.631366	0.790942	0.101855	0.0249946	FALSE
1130	YES-Dhcumarin50	1.00329	0.00473411	1.01991	0.0284361	1.0035	0.00504409	1.02084	0.0297544	12	0.549701	0.778385	0.108805	0.0180143	FALSE
1130	YES-EDTA0.1	1.00384	0.00553518	1.02047	0.0292371	1.00708	0.0101792	1.02448	0.0348895	12	0.479526	0.782967	0.106256	0.0177549	FALSE
1130	YES-EDTA0.3	1.00183	0.00264364	1.01843	0.0263456	0.997952	-0.00295767	1.01519	0.0217526	12	0.787052	0.912576	0.0397309	0.0227244	FALSE
1130	YES-EDTA0.6	1.00642	0.00923137	1.02309	0.0329333	1.00371	0.00534371	1.02105	0.030054	12	0.589622	0.853017	0.0690422	0.0403513	FALSE
1130	YES-EtOH5	1.012	0.0172063	1.02876	0.0409082	0.996179	-0.00552268	1.01339	0.0191876	12	0.439197	0.904825	0.0434353	0.0523906	FALSE
1130	YES-Forma2	0.998592	-0.00203229	1.01513	0.0216696	0.998519	-0.00213863	1.01577	0.0225717	12	0.807644	0.959078	0.0181462	0.0191568	FALSE
1130	YES-Forma3	0.988102	-0.0172684	1.00447	0.00643352	0.99042	-0.0138875	1.00753	0.0108228	12	0.197104	0.548045	0.261184	0.0301358	FALSE
1130	YES-HU30	0.995079	-0.00711701	1.01156	0.0165849	0.995945	-0.00586201	1.01315	0.0188483	12	0.204039	0.470594	0.327354	0.0118582	FALSE
1130	YES-HU45	1.00722	0.0103757	1.0239	0.0340777	1.00672	0.00966663	1.02411	0.0343769	12	0.448947	0.869949	0.0605063	0.0319617	FALSE
1130	YES-KCl0.5SDS0.01	1.02372	0.0338168	1.04067	0.0575188	1.01338	0.0191766	1.03089	0.0438869	12	0.160706	0.436203	0.360311	0.0553273	FALSE
1130	YES-KCl1SDS0.01	1.0253	0.0360412	1.04228	0.0597432	1.00387	0.00556985	1.02121	0.0302801	12	0.338082	0.657126	0.182351	0.0888006	FALSE
1130	YES-Ovana3	1.04113	0.0581544	1.05838	0.0818563	1.04718	0.0665061	1.06527	0.0912164	10	0.030087	0.492329	0.307745	0.0513407	FALSE
1130	YES-Ovana6	1.0621	0.086914	1.07969	0.110616	1.07469	0.103918	1.09325	0.128629	9	0.0162007	0.259211	0.586347	0.0624104	FALSE
1130	YES-SDS0.01	1.04183	0.0591152	1.05908	0.0828172	1.02131	0.0304267	1.03896	0.055137	14	0.0902901	0.46104	0.336262	0.0868019	FALSE
1130	YES-SDS0.02	1.03126	0.0444118	1.04835	0.0681137	1.0073	0.0104962	1.0247	0.0352065	10	0.0732446	0.245585	0.609798	0.0494455	FALSE
1130	YES-TBH15	1.30145	0.380119	1.32301	0.403821	1.17289	0.230066	1.19315	0.254776	6	0.10894	0.767263	0.115056	0.385317	FALSE
1130	YES-UV1000	0.949946	-0.074082	0.965682	-0.05038	0.980425	-0.0285212	0.997362	-0.00381089	12	0.187365	0.839481	0.0759889	0.125283	FALSE
1130	YES-UV10m	1.01034	0.0148395	1.02707	0.0385414	1.01162	0.0166741	1.0291	0.0413844	11	0.056749	0.355715	0.448898	0.0157191	FALSE
1130	YES-UV2000	1.02095	0.0299074	1.03786	0.0536093	1.02515	0.0358345	1.04286	0.0605448	11	0.0756962	0.63122	0.199819	0.0354238	FALSE
1130	YES-UV20m	0.999936	-9.21126e-05	1.0165	0.0236098	0.998184	-0.00262193	1.01543	0.0220884	12	0.985718	0.997942	0.000894683	0.0110592	FALSE
1130	YES-UV3000	1.01662	0.023779	1.03346	0.0474809	1.01752	0.0250583	1.0351	0.0497686	12	0.0375776	0.799507	0.0971778	0.0244575	FALSE
1130	YES-UV4000	1.00756	0.0108625	1.02425	0.0345644	1.0059	0.00848179	1.02327	0.0331921	12	0.378269	0.761849	0.118131	0.0285396	FALSE
1130	YES-UV5m	1.00559	0.00804712	1.02225	0.0317491	1.00118	0.00170217	1.01848	0.0264125	12	0.302546	0.673258	0.171818	0.017504	FALSE
1130	YES-UV6000	1.00768	0.0110392	1.02437	0.0347411	1.00004	5.53724e-05	1.01731	0.0247657	12	0.178568	0.548622	0.260727	0.0182029	FALSE
1130	YES-UV9000	0.99528	-0.00682542	1.01177	0.0168765	0.990805	-0.0133273	1.00792	0.011383	12	0.368075	0.701941	0.153699	0.0169586	FALSE
1130	YES-VPA5	0.9956	-0.00636228	1.01209	0.0173397	1.00503	0.00723476	1.02239	0.031945	12	0.729171	0.883102	0.0539891	0.0433075	FALSE
1130	YESphlox-Act0.1	1.01466	0.0209909	1.03622	0.0513283	1.0164	0.0234662	1.03474	0.0492657	16	0.12837	0.700891	0.15435	0.0364293	FALSE
1130	YESphlox-Act1	1.01901	0.0271659	1.04066	0.0575034	1.0142	0.0203484	1.0325	0.0461479	16	0.112394	0.913949	0.0390778	0.0454371	FALSE
1130	YESphlox-Act2	1.02837	0.040358	1.05022	0.0706955	1.02521	0.0359232	1.04371	0.0617227	16	0.0037754	0.217654	0.662234	0.0334953	FALSE
1130	YESphlox-stationary7	0.997117	-0.00416553	1.01831	0.0261719	1.00448	0.00644891	1.0226	0.0322484	24	0.540294	0.889891	0.0506631	0.0208421	FALSE
1130	YESphlox-Benza12	0.984105	-0.0231165	1.00502	0.00722093	0.985187	-0.0215302	1.00296	0.00426932	12	0.00254622	0.0414669	1.3823	0.0142035	FALSE
1130	YESphlox-Benza4	0.998134	-0.00269395	1.01935	0.0276435	1.00035	0.000506465	1.0184	0.026306	12	0.729501	0.860258	0.0653711	0.0172141	FALSE
1130	YESphlox-Benza8	0.987664	-0.0179074	1.00865	0.0124301	0.992576	-0.0107511	1.01049	0.0150485	12	0.050664	0.412549	0.384524	0.0190982	FALSE
1130	YESphlox-Bort500	1.01112	0.0159518	1.03261	0.0462893	1.01349	0.0193348	1.03178	0.0451343	12	0.310267	0.552664	0.257539	0.0363702	FALSE
1130	YESphlox-CdCl1	1.04049	0.057262	1.0626	0.0875995	1.03079	0.0437467	1.04939	0.0695462	7	0.141267	0.835165	0.0782275	0.0644933	FALSE
1130	YESphlox-Diamide2	0.990902	-0.013185	1.01196	0.0171524	0.982459	-0.0255303	1.00019	0.000269245	12	0.49222	0.810792	0.0910908	0.0447744	FALSE
1130	YESphlox-Diamide3	0.981703	-0.0266417	1.00257	0.00369579	0.994952	-0.00730084	1.0129	0.0184987	12	0.0884727	0.373552	0.427649	0.0341338	FALSE
1130	YESphlox-Diamide3.5	1.01012	0.0145241	1.03158	0.0448616	1.01507	0.0215743	1.03338	0.0473738	12	0.303434	0.508698	0.29354	0.0324782	FALSE
1130	YESphlox-EDTA4	0.991273	-0.0126455	1.01234	0.017692	1.02336	0.0333177	1.04183	0.0591172	12	0.710157	0.919976	0.0362234	0.0806382	FALSE
1130	YESphlox-EGTA1	0.992471	-0.0109028	1.01356	0.0194347	0.987599	-0.0180025	1.00542	0.00779703	12	0.25754	0.914659	0.0387409	0.0212997	FALSE
1130	YESphlox-EGTA10	1.07204	0.10036	1.09482	0.130698	1.00987	0.0141732	1.02809	0.0399727	12	0.0957124	0.363707	0.439248	0.139748	FALSE
1130	YESphlox-EGTA15	1.06255	0.0875313	1.08513	0.117869	1.0607	0.0850159	1.07984	0.110815	5	0.198189	0.969582	0.0134153	0.0926702	FALSE
1130	YESphlox-EGTA5	0.999598	-0.000579752	1.02084	0.0297577	1.00154	0.00221814	1.01961	0.0280177	12	0.91732	0.977332	0.00995798	0.0113271	FALSE
1130	YESphlox-EtOH0.1	0.994709	-0.00765364	1.01585	0.0226838	0.991033	-0.0129947	1.00892	0.0128048	16	0.430292	0.872879	0.0590461	0.0254044	FALSE
1130	YESphlox-EtOH10	0.992816	-0.0104022	1.01391	0.0199352	1.00905	0.0130029	1.02726	0.0388024	12	0.754647	0.956864	0.0191498	0.0790064	FALSE
1130	YESphlox-Forma2.5	0.993342	-0.00963761	1.01445	0.0206999	1.00289	0.00416158	1.02098	0.0299611	12	0.567471	0.869712	0.0606247	0.0393503	FALSE
1130	YESphlox-Gluc0.1stationary7	0.975014	-0.0365053	0.995734	-0.00616782	0.979758	-0.0295021	0.997437	-0.00370262	24	2.551e-05	0.00046651	3.33114	0.0233278	FALSE
1130	YESphlox-Gluc0.5stationary7	0.98211	-0.0260438	1.00298	0.00429371	0.98589	-0.0205014	1.00368	0.00529812	48	2.41267e-09	5.45263e-08	7.26339	0.0135723	FALSE
1130	YESphlox-Gluc1stationary7	0.989247	-0.015597	1.01027	0.0147405	0.989274	-0.0155579	1.00712	0.0102416	22	0.0492564	0.291434	0.53546	0.0230272	FALSE
1130	YESphlox-Glycerol2	0.995903	-0.0059226	1.01707	0.0244149	0.999621	-0.000546949	1.01766	0.0252526	12	0.499705	0.821127	0.0855897	0.0195744	FALSE
1130	YESphlox-Glycerol2MMS0.0075	1.05124	0.0720856	1.07358	0.102423	1.06007	0.0841529	1.07919	0.109952	12	0.000831178	0.0135363	1.8685	0.0400498	TRUE
1130	YESphlox-Glycerol3	0.995878	-0.00595839	1.01704	0.0243791	1.00441	0.00635545	1.02254	0.032155	12	0.462218	0.863345	0.0638155	0.0178497	FALSE
1130	YESphlox-Glycerol3MMS0.005	1.02981	0.0423743	1.05169	0.0727118	1.02631	0.0374678	1.04483	0.0632674	12	0.00149141	0.0283368	1.54765	0.0252355	FALSE
1130	YESphlox-HP10	1.06373	0.0891269	1.08633	0.119464	1.03607	0.0511178	1.05476	0.0769174	24	0.0513208	0.450357	0.346444	0.154807	FALSE
1130	YESphlox-HP15	1.11248	0.153782	1.13612	0.184119	1.09339	0.128808	1.11312	0.154608	8	0.092499	0.594625	0.225757	0.166787	FALSE
1130	YESphlox-HP2	0.982954	-0.0248048	1.00384	0.00553267	0.98915	-0.0157386	1.007	0.0100609	24	0.0121157	0.245776	0.609461	0.0300833	FALSE
1130	YESphlox-HP4	0.994808	-0.00751039	1.01595	0.0228271	0.996213	-0.00547355	1.01419	0.020326	36	0.326381	0.579326	0.237077	0.0294149	FALSE
1130	YESphlox-HP6	0.990378	-0.0139492	1.01142	0.0163882	0.996855	-0.00454501	1.01484	0.0212545	36	0.287864	0.526678	0.278455	0.053194	FALSE
1130	YESphlox-HP8	1.00774	0.0111257	1.02916	0.0414632	1.01634	0.0233827	1.03468	0.0491822	30	0.528279	0.789441	0.102681	0.0668694	FALSE
1130	YESphlox-HU8	0.997119	-0.00416234	1.01831	0.0261751	1.00008	0.000113817	1.01812	0.0259133	12	0.598771	0.741955	0.129623	0.0174594	FALSE
1130	YESphlox-HU8MMS0.075	0.993372	-0.00959375	1.01448	0.0207437	0.999397	-0.00087053	1.01743	0.024929	12	0.566016	0.968538	0.0138834	0.0390127	FALSE
1130	YESphlox-KCl0.5	0.98789	-0.0175782	1.00888	0.0127592	0.988225	-0.0170879	1.00606	0.00871158	12	0.0425526	0.24255	0.615199	0.0178651	FALSE
1130	YESphlox-KCl0.5SDS0.004	0.998475	-0.00220242	1.01969	0.028135	0.992386	-0.011027	1.01029	0.0147725	12	0.905637	0.995527	0.00194707	0.043922	FALSE
1130	YESphlox-KCl1	0.986557	-0.0195258	1.00752	0.0108116	0.992842	-0.0103645	1.01076	0.015435	12	0.0607425	0.301071	0.52133	0.0220491	FALSE
1130	YESphlox-LiCl4	0.989466	-0.015278	1.01049	0.0150594	0.997731	-0.00327683	1.01573	0.0225227	12	0.0601226	0.403916	0.393709	0.0168309	FALSE
1130	YESphlox-LiCl6	0.975819	-0.0353151	0.996556	-0.00497768	0.979439	-0.0299724	0.997112	-0.00417284	12	0.00802796	0.111175	0.953992	0.0262683	FALSE
1130	YESphlox-MMS0.005	1.01905	0.0272264	1.04071	0.0575639	1.02398	0.0341866	1.04246	0.0599861	12	0.0380715	0.166929	0.777469	0.0281283	FALSE
1130	YESphlox-MMS0.075	1.05959	0.0835086	1.08211	0.113846	1.05336	0.074998	1.07237	0.100798	24	1.5402e-05	0.000250832	3.60062	0.0546659	TRUE
1130	YESphlox-NaCl150	0.999644	-0.000513935	1.02089	0.0298235	1.00562	0.00808096	1.02376	0.0338805	12	0.947228	0.952989	0.0209122	0.0172008	FALSE
1130	YESphlox-NaCl150MMS0.005	1.00365	0.00525364	1.02498	0.0355911	0.997242	-0.00398502	1.01524	0.0218145	12	0.706815	0.897037	0.0471895	0.0326838	FALSE
1130	YESphlox-Ovana0.5	1.00262	0.00377261	1.02393	0.0341101	1.01177	0.0168857	1.03003	0.0426853	12	0.796052	0.958345	0.0184781	0.0342617	FALSE
1130	YESphlox-Ovana1	1.02588	0.0368673	1.04768	0.0672048	1.02564	0.0365269	1.04415	0.0623264	12	0.0536875	0.382523	0.417342	0.0420402	FALSE
1130	YESphlox-Ovana4	0.984138	-0.0230677	1.00505	0.00726979	0.992852	-0.0103492	1.01077	0.0154503	8	0.600021	0.855188	0.0679386	0.0832669	FALSE
1130	YESphlox-Phloxine2	0.997042	-0.00427422	1.01823	0.0260633	1.00044	0.000630237	1.01849	0.0264298	12	0.473212	0.914341	0.0388916	0.0122525	FALSE
1130	YESphlox-Phloxine2HP10	1.03976	0.0562568	1.06186	0.0865943	1.03373	0.0478658	1.05239	0.0736653	12	0.0895505	0.319024	0.496177	0.075336	FALSE
1130	YESphlox-Phloxine2HP15	1.14498	0.195319	1.16931	0.225656	1.13607	0.184056	1.15657	0.209855	10	0.0169196	0.301392	0.520868	0.160101	FALSE
1130	YESphlox-SDS0.004	0.991177	-0.012785	1.01224	0.0175525	0.995392	-0.00666384	1.01335	0.0191357	12	0.125288	0.575487	0.239964	0.0177496	FALSE
1130	YESphlox-TBH1	0.993879	-0.00885767	1.015	0.0214798	0.996232	-0.0054466	1.01421	0.0203529	12	0.232343	0.434216	0.362295	0.0158047	FALSE
1130	YESphlox-TBH1.5	0.955326	-0.0659347	0.975628	-0.0355972	0.939706	-0.0897179	0.956662	-0.0639184	6	0.0805227	0.428832	0.367713	0.0511186	FALSE
1130	YESphlox-TSA1000	0.989974	-0.0145375	1.01101	0.0158	0.995044	-0.0071673	1.013	0.0186322	12	0.0488598	0.345382	0.461701	0.0149833	FALSE
1130	YESphlox-TSA500	1.00466	0.0067111	1.02601	0.0370486	1.006	0.00862422	1.02415	0.0344237	12	0.459978	0.769993	0.113513	0.0204086	FALSE
1130	YESphlox-TeaTree1	0.993439	-0.00949703	1.01455	0.0208404	0.995764	-0.0061248	1.01373	0.0196747	12	0.219501	0.572027	0.242583	0.0165721	FALSE
1130	YESphlox-TeaTree10	1.00579	0.00832615	1.02716	0.0386636	1.00219	0.0031554	1.02027	0.0289549	12	0.534097	0.835452	0.0780783	0.0311367	FALSE
1130	YESphlox-TeaTree100	0.989787	-0.0148106	1.01082	0.0155269	0.997014	-0.0043137	1.015	0.0214858	12	0.112487	0.646712	0.189289	0.020029	FALSE
1130	YESphlox-Temp25	0.998581	-0.00204835	1.0198	0.0282891	1.00483	0.00695363	1.02296	0.0327531	12	0.899505	0.950514	0.0220417	0.0381899	FALSE
1130	YESphlox-Temp25Gluc0.1	0.977677	-0.0325706	0.998453	-0.00223311	0.984526	-0.0224983	1.00229	0.00330121	24	0.00186086	0.0123692	1.90766	0.030839	FALSE
1130	YESphlox-Temp25Gluc0.5	0.981664	-0.026699	1.00253	0.00363846	0.982025	-0.0261682	0.999744	-0.000368659	24	6.58354e-05	0.0024798	2.60558	0.0178	FALSE
1130	YESphlox-Temp25Gluc1	0.989141	-0.0157524	1.01016	0.014585	0.990987	-0.0130626	1.00887	0.0127369	24	0.0214606	0.10158	0.993191	0.0200469	FALSE
1130	YESphlox-Temp25Gluc3	0.996471	-0.00510003	1.01765	0.0252374	0.999864	-0.000196317	1.01791	0.0256032	12	0.672367	0.96905	0.0136538	0.0278657	FALSE
1130	YESphlox-Tuni20	1.00305	0.00439127	1.02436	0.0347287	1.04219	0.059614	1.06099	0.0854135	9	0.944217	0.981455	0.00812966	0.129223	FALSE
1130	YESphlox-Tuni40	1.02996	0.0425826	1.05184	0.0729201	1.0162	0.0231858	1.03454	0.0489853	9	0.221114	0.763737	0.117056	0.0689605	FALSE
1130	YESphlox-Tuni60	0.988392	-0.016845	1.0094	0.0134925	1.02167	0.0309304	1.04011	0.0567299	6	0.746467	0.977931	0.00969185	0.0848551	FALSE
1130	YESphlox-Tuni80	1.00198	0.0028587	1.02328	0.0331962	0.978822	-0.030881	0.996484	-0.00508152	9	0.9364	0.981927	0.00792093	0.0735574	FALSE
1130	YESphlox-VPA10	0.959836	-0.0591408	0.980233	-0.0288034	0.962161	-0.055649	0.979522	-0.0298495	7	0.00281585	0.0358381	1.44565	0.0230396	FALSE
1130	YESphlox-VPA8	0.989977	-0.0145334	1.01101	0.015804	0.990177	-0.0142417	1.00804	0.0115578	10	0.451655	0.785997	0.104579	0.0406839	FALSE
1130	YESphlox-Xylose2	0.989298	-0.0155229	1.01032	0.0148146	0.989827	-0.0147512	1.00769	0.0110483	10	0.208431	0.641254	0.19297	0.0248628	FALSE
1130	Yesphlox-Caffeine10	1.06724	0.0938844	1.08992	0.124222	1.04353	0.06147	1.06236	0.0872695	14	0.0363667	0.559918	0.251876	0.109977	FALSE
1130	Yesphlox-DMSO	1.00858	0.012328	1.03002	0.0426655	1.01636	0.0234162	1.0347	0.0492157	16	0.350224	0.908621	0.0416172	0.0354638	FALSE
1130	Yesphlox-Gal2	1.07189	0.100161	1.09467	0.130499	1.036	0.0510259	1.05469	0.0768255	16	0.0873292	0.424224	0.372405	0.160395	FALSE
1130	Yesphlox-Rapa1	1.0172	0.0245999	1.03881	0.0549374	1.00925	0.0132829	1.02746	0.0390824	14	0.156195	0.742248	0.129451	0.0430989	FALSE
1130	Yesphlox-Rapa100	1.04893	0.0689198	1.07122	0.0992573	1.03135	0.0445357	1.04996	0.0703353	16	0.0296852	0.384584	0.415009	0.0829426	FALSE
1130	Yesphlox-Sorb1.2	1.00907	0.013021	1.03051	0.0433585	0.995513	-0.00648819	1.01348	0.0193113	14	0.490039	0.884897	0.0531075	0.0481849	FALSE
1130	Yesphlox-Torin5	1.05997	0.0840278	1.0825	0.114365	1.04542	0.0640873	1.06429	0.0898868	16	0.00790101	0.25703	0.590015	0.0798139	FALSE
115	EMM-3AT4	0.982989	-0.024753	0.990316	-0.0140393	1.00064	0.000916017	0.99945	-0.000793015	12	0.171982	0.63472	0.197418	0.030047	FALSE
115	EMM-3AT6	0.984116	-0.0231	0.991451	-0.0123863	0.998855	-0.00165222	0.997673	-0.00336125	12	0.164324	0.579871	0.236669	0.0250037	FALSE
115	EMM-Bleo200	0.985697	-0.0207836	0.993044	-0.0100699	0.990844	-0.0132707	0.989671	-0.0149797	12	0.138691	0.382917	0.416895	0.0139167	FALSE
115	EMM-Canav60	0.98778	-0.0177389	0.995142	-0.00702524	0.995643	-0.00629887	0.994465	-0.0080079	12	0.507576	0.91294	0.0395579	0.0553954	FALSE
115	EMM-Cys	1.03631	0.0514617	1.04404	0.0621754	0.999299	-0.00101151	0.998116	-0.00272054	24	0.305275	0.618861	0.208407	0.165986	FALSE
115	EMM-Met	1.01772	0.0253467	1.02531	0.0360604	1.00241	0.00347852	1.00123	0.00176948	24	0.489981	0.827771	0.0820897	0.117606	FALSE
115	EMMphlox-Act0.1	0.9992	-0.0011553	0.993999	-0.00868345	0.998265	-0.00250522	0.998295	-0.00246214	16	0.919709	0.957692	0.018774	0.0262129	FALSE
115	EMMphlox-Act1	1.00405	0.00583612	0.998828	-0.00169203	0.99997	-4.30793e-05	1	0	15	0.574246	0.862946	0.0640163	0.0219299	FALSE
115	EMMphlox-Act2	0.996752	-0.00469342	0.991564	-0.0122216	1.00081	0.00116469	1.00084	0.00120777	16	0.865973	0.972997	0.0118884	0.0734286	FALSE
115	EMMphlox-Cana75	0.983871	-0.0234591	0.97875	-0.0309873	0.990216	-0.0141855	0.990245	-0.0141425	24	0.0276933	0.252101	0.598425	0.0275223	FALSE
115	EMMphlox-EtOH0.1	1.0324	0.0460054	1.02703	0.0384772	1.00024	0.000340079	1.00027	0.000383158	16	0.138411	0.855105	0.0679805	0.0809725	FALSE
115	YES-Bleo200	0.996979	-0.00436564	0.983697	-0.0237136	0.999048	-0.00137359	0.991196	-0.0127584	12	0.780876	0.953084	0.0208687	0.0341171	FALSE
115	YES-Bleo300	1.01964	0.0280639	1.00606	0.008716	1.01356	0.0194261	1.00559	0.00804125	4	0.293497	0.927189	0.0328319	0.0303056	FALSE
115	YES-Bleo600	1.02415	0.0344225	1.0105	0.0150746	1.02233	0.0318597	1.01429	0.0204749	8	0.149853	0.545209	0.263437	0.0409623	FALSE
115	YES-Bortezomib100	1.01055	0.0151442	0.99709	-0.00420374	1.0028	0.00403964	0.994922	-0.00734522	12	0.177868	0.509329	0.293001	0.0224003	FALSE
115	YES-Bortezomib200	0.994994	-0.00724014	0.981739	-0.0265881	0.98289	-0.0248983	0.975164	-0.0362832	12	0.480632	0.688649	0.162002	0.0201245	FALSE
115	YES-Bref60	1.092	0.126979	1.07746	0.107631	1.03587	0.0508488	1.02773	0.039464	12	0.0827323	0.241833	0.616485	0.164462	FALSE
115	YES-Calco10KCl0.5	0.994733	-0.00761892	0.981482	-0.0269669	0.99685	-0.00455203	0.989014	-0.0159369	12	0.748716	0.886234	0.0524514	0.0534455	FALSE
115	YES-Calco2	0.956278	-0.0644982	0.943539	-0.0838462	1.00365	0.00525509	0.99576	-0.00612977	11	0.220772	0.616792	0.209861	0.109045	FALSE
115	YES-Calco4KCl0.5	0.99928	-0.00103921	0.985968	-0.0203871	1.001	0.00144463	0.993134	-0.00994023	12	0.945586	0.988961	0.00482081	0.0330595	FALSE
115	YES-Cana120	0.942371	-0.0856332	0.929817	-0.104981	0.985112	-0.0216396	0.977369	-0.0330245	11	0.108434	0.421451	0.375253	0.106561	FALSE
115	YES-Cana60	0.943371	-0.0841023	0.930804	-0.10345	0.991596	-0.0121764	0.983801	-0.0235612	12	0.146903	0.473591	0.324596	0.123563	FALSE
115	YES-CoCl0.25	1.00001	8.39359e-06	0.986684	-0.0193395	0.98739	-0.0183084	0.979629	-0.0296933	12	0.999566	0.999566	0.000188677	0.0335517	FALSE
115	YES-CoCl5	0.994257	-0.00830874	0.981012	-0.0276567	0.995817	-0.00604737	0.98799	-0.0174322	12	0.415753	0.631945	0.199321	0.0199113	FALSE
115	YES-Cycloh100	1.0068	0.0097809	0.993391	-0.00956704	1.00482	0.00693114	0.996918	-0.00445372	12	0.311432	0.826745	0.0826284	0.0184959	FALSE
115	YES-Cycloh200	0.996513	-0.00503953	0.983238	-0.0243875	0.991658	-0.0120849	0.983864	-0.0234698	12	0.559751	0.902795	0.044411	0.0156551	FALSE
115	YES-Cycloh400	1.01122	0.0160933	0.997747	-0.00325461	1.01525	0.0218418	1.00727	0.0104569	12	0.324105	0.669966	0.173947	0.0352787	FALSE
115	YES-Cycloh600	1.01104	0.0158356	0.997568	-0.00351238	1.00801	0.0115167	1.00009	0.000131872	12	0.371784	0.962292	0.016693	0.038784	FALSE
115	YES-Dhcumarin100	1.02077	0.0296577	1.00717	0.0103098	1.01929	0.0275714	1.01128	0.0161866	9	0.0526877	0.400427	0.397477	0.0261061	FALSE
115	YES-Dhcumarin200	0.977648	-0.0326124	0.964625	-0.0519603	0.985551	-0.0209979	0.977804	-0.0323828	11	0.248288	0.648252	0.188256	0.0587008	FALSE
115	YES-Dhcumarin50	1.00286	0.00411882	0.989499	-0.0152291	1.00135	0.0019481	0.99348	-0.00943675	12	0.815141	0.912033	0.0399896	0.0389455	FALSE
115	YES-EDTA0.1	1.01692	0.0242044	1.00337	0.00485642	1.00812	0.01167	1.0002	0.000285159	12	0.14319	0.682852	0.165673	0.0350422	FALSE
115	YES-EDTA0.3	1.0066	0.00949253	0.993192	-0.00985541	1.01452	0.0207919	1.00654	0.00940705	12	0.59004	0.8736	0.0586873	0.0388365	FALSE
115	YES-EDTA0.6	1.0125	0.0179196	0.99901	-0.00142833	1.00899	0.0129089	1.00106	0.00152402	12	0.440701	0.829861	0.0809948	0.0520812	FALSE
115	YES-EtOH5	1.00286	0.0041185	0.989499	-0.0152294	0.993848	-0.00890348	0.986036	-0.0202883	12	0.714133	0.971301	0.0126463	0.0229591	FALSE
115	YES-Forma2	1.00824	0.0118452	0.994813	-0.00750273	1.0103	0.0147865	1.00236	0.00340162	12	0.337015	0.681006	0.166849	0.0255081	FALSE
115	YES-Forma3	1.01608	0.0230098	1.00254	0.00366189	1.01572	0.0225059	1.00774	0.011121	12	0.0169358	0.175517	0.755682	0.0173132	FALSE
115	YES-HU30	1.01193	0.0171041	0.998446	-0.00224384	1.00748	0.0107504	0.99956	-0.000634466	12	0.0221328	0.182705	0.73825	0.0115893	FALSE
115	YES-HU45	1.00002	2.22435e-05	0.986694	-0.0193257	0.997398	-0.00375946	0.989558	-0.0151443	12	0.998767	0.998767	0.000536028	0.0309971	FALSE
115	YES-KCl0.5SDS0.01	0.937404	-0.0932572	0.924916	-0.112605	0.98834	-0.0169207	0.980571	-0.0283056	12	0.138469	0.436203	0.360311	0.133511	FALSE
115	YES-KCl1SDS0.01	0.927008	-0.109346	0.914659	-0.128694	0.999908	-0.00013283	0.992048	-0.0115177	12	0.143306	0.429651	0.366884	0.157933	FALSE
115	YES-Ovana3	1.04389	0.0619641	1.02998	0.0426162	1.06718	0.0938078	1.05879	0.0824229	10	0.440249	0.683316	0.165378	0.169266	FALSE
115	YES-Ovana6	1.01828	0.0261273	1.00471	0.00677932	1.00557	0.0080077	0.997662	-0.00337716	12	0.305594	0.669246	0.174414	0.0569811	FALSE
115	YES-SDS0.01	0.979387	-0.0300493	0.96634	-0.0493972	1.00032	0.000464691	0.992459	-0.0109202	16	0.337363	0.600929	0.221177	0.0809241	FALSE
115	YES-SDS0.02	0.98923	-0.015622	0.976052	-0.0349699	0.974877	-0.0367073	0.967215	-0.0480922	7	0.272308	0.477587	0.320948	0.021897	FALSE
115	YES-TBH15	0.968973	-0.0454722	0.956065	-0.0648201	1.05176	0.0728093	1.0435	0.0614244	4	0.84486	0.918611	0.0368685	0.287166	FALSE
115	YES-UV1000	1.01402	0.0200806	1.00051	0.000732618	0.985071	-0.0216997	0.977328	-0.0330846	12	0.712735	0.966066	0.0149934	0.12621	FALSE
115	YES-UV10m	0.999822	-0.00025724	0.986503	-0.0196052	0.997502	-0.0036083	0.989661	-0.0149932	12	0.989259	0.998082	0.000833937	0.042531	FALSE
115	YES-UV2000	0.989548	-0.0151586	0.976366	-0.0345066	1.00979	0.0140504	1.00185	0.00266554	11	0.741607	0.889929	0.0506448	0.10023	FALSE
115	YES-UV20m	1.00125	0.00180446	0.987913	-0.0175435	1.00283	0.00408266	0.994951	-0.0073022	12	0.918853	0.997942	0.000894683	0.0391778	FALSE
115	YES-UV3000	1.00799	0.0114747	0.994558	-0.00787324	1.00301	0.00433435	0.995125	-0.00705051	12	0.331994	0.926811	0.0330089	0.0242082	FALSE
115	YES-UV4000	1.00475	0.00683348	0.991363	-0.0125145	1.00253	0.00363938	0.994646	-0.00774547	9	0.661013	0.89431	0.0485119	0.029113	FALSE
115	YES-UV5m	1.01823	0.0260596	1.00466	0.00671163	1.00944	0.0135619	1.00151	0.00217705	12	0.09107	0.57446	0.24074	0.032008	FALSE
115	YES-UV6000	0.991464	-0.0123677	0.978256	-0.0317156	1.00792	0.0113849	1	0	12	0.551638	0.80006	0.0968775	0.0459735	FALSE
115	YES-UV9000	0.999793	-0.000299135	0.986474	-0.0196471	1.00882	0.0126742	1.00089	0.00128936	11	0.987278	0.987278	0.00556065	0.0398339	FALSE
115	YES-VPA5	0.986778	-0.0192025	0.973633	-0.0385504	0.982523	-0.025437	0.9748	-0.0368219	12	0.0938853	0.305798	0.514566	0.0222398	FALSE
115	YESphlox-Act0.1	1.02621	0.037329	1.02092	0.0298745	0.99284	-0.0103662	0.99284	-0.0103662	16	0.245304	0.824511	0.0838034	0.0856735	FALSE
115	YESphlox-Act1	0.991782	-0.0119055	0.98667	-0.01936	0.994116	-0.00851381	0.994116	-0.00851381	16	0.594193	0.924906	0.0339026	0.0591506	FALSE
115	YESphlox-Act2	0.991861	-0.0117894	0.98675	-0.0192439	0.984561	-0.0224472	0.984561	-0.0224472	16	0.304108	0.780951	0.107376	0.0286577	FALSE
115	YESphlox-stationary7	0.999243	-0.00109264	0.994093	-0.0085471	0.989668	-0.0149832	0.989668	-0.0149832	24	0.925981	0.945966	0.0241244	0.0370062	FALSE
115	YESphlox-Benza12	0.988607	-0.0165311	0.983512	-0.0239856	0.981039	-0.0276175	0.981039	-0.0276175	12	0.137873	0.510032	0.292402	0.023172	FALSE
115	YESphlox-Benza4	1.00439	0.00631845	0.999213	-0.00113601	0.992341	-0.0110927	0.992341	-0.0110927	12	0.623424	0.798543	0.0977019	0.0285628	FALSE
115	YESphlox-Benza8	0.993614	-0.00924256	0.988493	-0.016697	0.990638	-0.0135703	0.990638	-0.0135703	12	0.292111	0.628315	0.201823	0.0179065	FALSE
115	YESphlox-Bort500	0.999264	-0.00106209	0.994114	-0.00851655	1.00401	0.00577412	1.00401	0.00577412	12	0.949178	0.974832	0.0110703	0.0378162	FALSE
115	YESphlox-CdCl1	0.940743	-0.088128	0.935894	-0.0955825	0.923572	-0.114703	0.923572	-0.114703	7	0.38598	0.835165	0.0782275	0.166745	FALSE
115	YESphlox-Diamide2	0.996464	-0.00511099	0.991328	-0.0125654	0.999859	-0.000202794	0.999859	-0.000202794	12	0.797791	0.912879	0.0395869	0.0455372	FALSE
115	YESphlox-Diamide3	0.966414	-0.0492863	0.961434	-0.0567408	0.970709	-0.0428895	0.970709	-0.0428895	12	0.115714	0.39974	0.398222	0.0673315	FALSE
115	YESphlox-Diamide3.5	1.03704	0.0524664	1.03169	0.0450119	1.0223	0.031819	1.0223	0.031819	12	0.0598305	0.243596	0.613331	0.0604301	FALSE
115	YESphlox-EDTA4	1.02498	0.0355931	1.0197	0.0281386	0.998081	-0.00277112	0.998081	-0.00277112	12	0.226831	0.6703	0.173731	0.0667245	FALSE
115	YESphlox-EGTA1	0.993132	-0.00994225	0.988014	-0.0173967	0.981092	-0.0275397	0.981092	-0.0275397	12	0.436494	0.914659	0.0387409	0.027951	FALSE
115	YESphlox-EGTA10	1.06779	0.0946325	1.06229	0.087178	1.02824	0.0401759	1.02824	0.0401759	12	0.286529	0.573059	0.241801	0.208408	FALSE
115	YESphlox-EGTA15	1.2164	0.282614	1.21013	0.275159	1.21013	0.275159	1.21013	0.275159	1					FALSE
115	YESphlox-EGTA5	1.00792	0.0113859	1.00273	0.00393142	1.00547	0.00787626	1.00547	0.00787626	12	0.145164	0.853051	0.0690248	0.0153309	FALSE
115	YESphlox-EtOH0.1	1.01507	0.0215786	1.00984	0.0141241	1.00348	0.00500973	1.00348	0.00500973	16	0.277347	0.794876	0.0997004	0.0522204	FALSE
115	YESphlox-EtOH10	0.985348	-0.021295	0.98027	-0.0287495	0.98878	-0.0162781	0.98878	-0.0162781	12	0.541714	0.956864	0.0191498	0.0796869	FALSE
115	YESphlox-Forma2.5	1.00133	0.00191077	0.996165	-0.00554369	0.987676	-0.0178909	0.987676	-0.0178909	12	0.890641	0.966003	0.0150216	0.0311605	FALSE
115	YESphlox-Gluc0.1stationary7	0.992382	-0.0110318	0.987268	-0.0184863	0.983798	-0.0235658	0.983798	-0.0235658	24	0.291845	0.549641	0.259921	0.0319143	FALSE
115	YESphlox-Gluc0.5stationary7	1.00506	0.00728481	0.999882	-0.000169645	1.0009	0.00130458	1.0009	0.00130458	48	0.261728	0.428627	0.36792	0.0243828	FALSE
115	YESphlox-Gluc1stationary7	0.97831	-0.0316362	0.973268	-0.0390906	0.984221	-0.0229452	0.984221	-0.0229452	24	0.142514	0.449711	0.347067	0.0684844	FALSE
115	YESphlox-Glycerol2	0.998978	-0.00147449	0.99383	-0.00892895	0.986007	-0.0203309	0.986007	-0.0203309	12	0.909126	0.981461	0.00812715	0.0287362	FALSE
115	YESphlox-Glycerol2MMS0.0075	1.05355	0.0752599	1.04812	0.0678054	1.05274	0.0741437	1.05274	0.0741437	12	0.000537877	0.0122636	1.91138	0.0387208	TRUE
115	YESphlox-Glycerol3	1.00089	0.00127673	0.995727	-0.00617773	1.00502	0.00722952	1.00502	0.00722952	12	0.915358	0.9743	0.0113075	0.0265392	FALSE
115	YESphlox-Glycerol3MMS0.005	1.01344	0.019259	1.00822	0.0118046	1.00208	0.00299532	1.00208	0.00299532	12	0.119283	0.323277	0.490425	0.0262486	FALSE
115	YESphlox-HP10	1.00742	0.0106671	1.00223	0.00321268	1.02211	0.0315573	1.02211	0.0315573	16	0.798396	0.898422	0.0465194	0.113089	FALSE
115	YESphlox-HP15	1.00828	0.0118939	1.00308	0.00443941	0.998984	-0.00146599	0.998984	-0.00146599	9	0.872774	0.947089	0.0236093	0.149228	FALSE
115	YESphlox-HP2	0.998017	-0.00286329	0.992874	-0.0103178	1	0	1	0	24	0.822353	0.936043	0.0287042	0.0404625	FALSE
115	YESphlox-HP4	0.965957	-0.0499691	0.960979	-0.0574236	0.995098	-0.00708963	0.995098	-0.00708963	36	0.165365	0.411961	0.385144	0.14255	FALSE
115	YESphlox-HP6	0.955962	-0.0649743	0.951036	-0.0724287	0.994114	-0.00851683	0.994114	-0.00851683	36	0.130746	0.3503	0.45556	0.169142	FALSE
115	YESphlox-HP8	0.971035	-0.0424053	0.96603	-0.0498598	1.00373	0.00536581	1.00373	0.00536581	24	0.504382	0.789441	0.102681	0.207731	FALSE
115	YESphlox-HU8	0.980605	-0.0282559	0.975551	-0.0357104	0.973446	-0.0388266	0.973446	-0.0388266	12	0.0836002	0.290567	0.536753	0.0343173	FALSE
115	YESphlox-HU8MMS0.075	1.00931	0.0133709	1.00411	0.0059164	1.00502	0.00722482	1.00502	0.00722482	12	0.28562	0.814017	0.0893664	0.0272765	FALSE
115	YESphlox-KCl0.5	0.993315	-0.00967622	0.988196	-0.0171307	0.984408	-0.0226722	0.984408	-0.0226722	12	0.564588	0.818712	0.0868688	0.0377456	FALSE
115	YESphlox-KCl0.5SDS0.004	0.98467	-0.0222885	0.979595	-0.0297429	0.979348	-0.0301061	0.979348	-0.0301061	12	0.346036	0.705393	0.151569	0.0529643	FALSE
115	YESphlox-KCl1	0.979462	-0.0299387	0.974414	-0.0373932	0.992639	-0.0106588	0.992639	-0.0106588	12	0.221799	0.513125	0.289777	0.0540128	FALSE
115	YESphlox-LiCl4	0.988794	-0.0162588	0.983698	-0.0237133	0.990085	-0.0143756	0.990085	-0.0143756	12	0.13198	0.600427	0.22154	0.0223284	FALSE
115	YESphlox-LiCl6	0.998108	-0.00273246	0.992964	-0.0101869	0.990365	-0.0139675	0.990365	-0.0139675	12	0.838573	0.92353	0.0345488	0.0299129	FALSE
115	YESphlox-MMS0.005	1.02806	0.0399286	1.02276	0.0324742	1.00279	0.00401298	1.00279	0.00401298	11	0.0207681	0.147972	0.829819	0.033376	FALSE
115	YESphlox-MMS0.075	1.02582	0.036775	1.02053	0.0293205	1.01702	0.0243464	1.01702	0.0243464	24	0.00144062	0.00821154	2.08558	0.0333601	FALSE
115	YESphlox-NaCl150	1.00373	0.00537545	0.99856	-0.00207901	0.999708	-0.00042075	0.999708	-0.00042075	12	0.509945	0.877703	0.0566524	0.0166308	FALSE
115	YESphlox-NaCl150MMS0.005	1.01317	0.0188792	1.00795	0.0114247	1.01145	0.0164287	1.01145	0.0164287	12	0.0278629	0.193089	0.714241	0.0165509	FALSE
115	YESphlox-Ovana0.5	0.987975	-0.0174533	0.982883	-0.0249078	0.99541	-0.00663725	0.99541	-0.00663725	12	0.449143	0.875972	0.0575097	0.0520647	FALSE
115	YESphlox-Ovana1	1.00346	0.0049765	0.998284	-0.00247796	1.00177	0.00255481	1.00177	0.00255481	12	0.724494	0.897743	0.0468481	0.031666	FALSE
115	YESphlox-Ovana4	0.950538	-0.0731836	0.945639	-0.080638	0.959813	-0.0591749	0.959813	-0.0591749	7	0.266797	0.851387	0.0698728	0.106208	FALSE
115	YESphlox-Phloxine2	1.00665	0.00955815	1.00146	0.00210369	1.00235	0.00339257	1.00235	0.00339257	12	0.441301	0.914341	0.0388916	0.0272837	FALSE
115	YESphlox-Phloxine2HP10	1.02106	0.0300727	1.0158	0.0226183	1	0	1	0	12	0.47599	0.704712	0.151988	0.0979699	FALSE
115	YESphlox-Phloxine2HP15	1.09261	0.12778	1.08698	0.120325	1.0633	0.0885486	1.0633	0.0885486	12	0.0186703	0.301392	0.520868	0.115654	FALSE
115	YESphlox-SDS0.004	0.997027	-0.00429597	0.991888	-0.0117504	0.993558	-0.00932414	0.993558	-0.00932414	12	0.646281	0.942516	0.0257111	0.0197501	FALSE
115	YESphlox-TBH1	0.994505	-0.00794936	0.98938	-0.0154038	0.999433	-0.000817611	0.999433	-0.000817611	12	0.467796	0.65838	0.181523	0.0235637	FALSE
115	YESphlox-TBH1.5	0.867516	-0.205038	0.863045	-0.212492	0.892801	-0.163589	0.892801	-0.163589	4	0.0731415	0.428832	0.367713	0.097396	FALSE
115	YESphlox-TSA1000	1.01608	0.023014	1.01084	0.0155596	1.00996	0.0143039	1.00996	0.0143039	12	0.148454	0.550842	0.258973	0.0347402	FALSE
115	YESphlox-TSA500	1.01476	0.0211371	1.00953	0.0136826	1.00385	0.00554198	1.00385	0.00554198	12	0.107401	0.539014	0.2684	0.0279451	FALSE
115	YESphlox-TeaTree1	0.982537	-0.0254166	0.977473	-0.032871	0.994111	-0.00852172	0.994111	-0.00852172	12	0.205014	0.572027	0.242583	0.0438988	FALSE
115	YESphlox-TeaTree10	0.99671	-0.00475435	0.991573	-0.0122088	0.995087	-0.00710487	0.995087	-0.00710487	12	0.711654	0.881832	0.0546141	0.0284897	FALSE
115	YESphlox-TeaTree100	1.00725	0.0104223	1.00206	0.00296783	1.00593	0.00853378	1.00593	0.00853378	12	0.315696	0.889297	0.0509533	0.0221338	FALSE
115	YESphlox-Temp25	1.00743	0.0106861	1.00224	0.00323167	0.983498	-0.0240063	0.983498	-0.0240063	12	0.687065	0.913227	0.0394213	0.0612786	FALSE
115	YESphlox-Temp25Gluc0.1	1.00451	0.00649789	0.999337	-0.000956571	0.995881	-0.00595462	0.995881	-0.00595462	24	0.586663	0.683432	0.165304	0.0376872	FALSE
115	YESphlox-Temp25Gluc0.5	1.00454	0.00654035	0.999367	-0.000914108	1.00464	0.00667439	1.00464	0.00667439	24	0.47206	0.675225	0.170551	0.0273286	FALSE
115	YESphlox-Temp25Gluc1	0.996545	-0.00499307	0.991409	-0.0124475	0.980652	-0.0281863	0.980652	-0.0281863	24	0.682579	0.781663	0.10698	0.0384749	FALSE
115	YESphlox-Temp25Gluc3	1.00287	0.00413951	0.997705	-0.00331495	0.997234	-0.00399536	0.997234	-0.00399536	12	0.862406	0.96905	0.0136538	0.0550734	FALSE
115	YESphlox-Tuni20	1.08739	0.120874	1.08179	0.11342	1.08454	0.11709	1.08454	0.11709	5	0.00948576	0.156517	0.805437	0.0423318	FALSE
115	YESphlox-Tuni40	1.03083	0.0438002	1.02551	0.0363457	1.01631	0.0233442	1.01631	0.0233442	11	0.206151	0.763737	0.117056	0.074826	FALSE
115	YESphlox-Tuni60	1.09788	0.134717	1.09222	0.127262	1	0	1	0	7	0.557825	0.897652	0.0468921	0.415225	FALSE
115	YESphlox-Tuni80	0.968244	-0.0465571	0.963254	-0.0540115	0.958613	-0.0609793	0.958613	-0.0609793	8	0.201181	0.861345	0.0648229	0.0630569	FALSE
115	YESphlox-VPA10	0.977764	-0.0324413	0.972725	-0.0398957	0.982997	-0.0247416	0.982997	-0.0247416	9	0.30058	0.601161	0.221009	0.0595498	FALSE
115	YESphlox-VPA8	0.983871	-0.0234587	0.978801	-0.0309132	0.977022	-0.0335371	0.977022	-0.0335371	11	0.215734	0.55593	0.25498	0.0394972	FALSE
115	YESphlox-Xylose2	1.02834	0.0403216	1.02304	0.0328672	1.02216	0.0316164	1.02216	0.0316164	12	0.0211978	0.268506	0.571046	0.0358844	FALSE
115	Yesphlox-Caffeine10	1.01134	0.0162663	1.00613	0.00881184	0.957748	-0.0622816	0.957748	-0.0622816	12	0.756016	0.940772	0.0265156	0.122326	FALSE
115	Yesphlox-DMSO	1.0047	0.00676982	0.999526	-0.000684641	0.987825	-0.017672	0.987825	-0.017672	16	0.823523	0.997352	0.00115156	0.081786	FALSE
115	Yesphlox-Gal2	0.999413	-0.000846763	0.994263	-0.00830122	0.993845	-0.00890786	0.993845	-0.00890786	16	0.97788	0.984815	0.00664521	0.0821363	FALSE
115	Yesphlox-Rapa1	1.03558	0.0504383	1.03024	0.0429838	1.0219	0.0312519	1.0219	0.0312519	16	0.0417664	0.742248	0.129451	0.0629969	FALSE
115	Yesphlox-Rapa100	0.983147	-0.0245211	0.97808	-0.0319755	0.9856	-0.0209252	0.9856	-0.0209252	16	0.381475	0.718054	0.143843	0.0736588	FALSE
115	Yesphlox-Sorb1.2	1.02476	0.0352907	1.01948	0.0278362	1.02102	0.0300056	1.02102	0.0300056	16	0.171684	0.855829	0.0676129	0.0679397	FALSE
115	Yesphlox-Torin5	1.0166	0.023753	1.01136	0.0162986	1.00172	0.00248022	1.00172	0.00248022	16	0.552176	0.831803	0.0799797	0.108116	FALSE
1154	EMM-3AT4	0.996746	-0.00470235	1.00335	0.00482241	1.0036	0.00518049	1.00511	0.00735998	12	0.63877	0.93033	0.0313629	0.0205724	FALSE
1154	EMM-3AT6	0.99661	-0.00489843	1.00321	0.00462633	1.0052	0.00747625	1.00672	0.00965574	12	0.712795	0.917319	0.0374795	0.029149	FALSE
1154	EMM-Bleo200	1.00548	0.00788725	1.01214	0.017412	1.00478	0.00687839	1.0063	0.00905788	12	0.401809	0.61517	0.211005	0.0188706	FALSE
1154	EMM-Canav60	0.994012	-0.00866443	1.0006	0.000860331	0.994012	-0.00866468	0.995515	-0.00648518	12	0.301702	0.846784	0.0722273	0.0157926	FALSE
1154	EMM-Cys	0.994197	-0.00839607	1.00078	0.0011287	0.999303	-0.00100544	1.00081	0.00117406	21	0.416094	0.677638	0.169002	0.0284004	FALSE
1154	EMM-Met	1.00946	0.0135833	1.01615	0.023108	1.0042	0.00604654	1.00572	0.00822604	24	0.207806	0.704828	0.151917	0.0322075	FALSE
1154	EMMphlox-Act0.1	1.00316	0.00455124	1.01394	0.0199745	1.00435	0.00626425	1.01308	0.018753	16	0.753307	0.94457	0.0247656	0.0289607	FALSE
1154	EMMphlox-Act1	1.00551	0.00793374	1.01632	0.023357	1.00558	0.00802665	1.01432	0.0205154	16	0.559418	0.862946	0.0640163	0.0254195	FALSE
1154	EMMphlox-Act2	1.00935	0.0134269	1.0202	0.0288502	1.01117	0.0160199	1.01996	0.0285086	16	0.532032	0.86175	0.064619	0.0525619	FALSE
1154	EMMphlox-Cana75	0.994845	-0.00745689	1.00554	0.00796637	0.997908	-0.00302116	1.00658	0.0094676	24	0.533694	0.746109	0.127197	0.0217929	FALSE
1154	EMMphlox-EtOH0.1	1.01427	0.0204388	1.02517	0.0358621	1.01312	0.0188067	1.02193	0.0312955	16	0.283297	0.855105	0.0679805	0.0445773	FALSE
1154	YES-Bleo200	0.99879	-0.00174689	1.00732	0.0105268	0.997534	-0.0035625	1.00323	0.00465043	12	0.798872	0.953084	0.0208687	0.0155425	FALSE
1154	YES-Bleo300	1.0133	0.0190609	1.02196	0.0313345	1.01515	0.0216998	1.02095	0.0299128	4	0.104489	0.927189	0.0328319	0.011791	FALSE
1154	YES-Bleo600	1.00078	0.00112153	1.00933	0.0133952	1.00495	0.0071221	1.01069	0.015335	8	0.856353	0.952483	0.0211428	0.0112433	FALSE
1154	YES-Bortezomib100	0.998701	-0.00187509	1.00723	0.0103986	0.999833	-0.000241303	1.00554	0.00797163	12	0.653256	0.836755	0.0774016	0.008715	FALSE
1154	YES-Bortezomib200	1.00757	0.0108827	1.01618	0.0231564	1.00822	0.0118158	1.01398	0.0200287	12	0.131417	0.356704	0.447692	0.0157323	FALSE
1154	YES-Bref60	1.18431	0.244048	1.19443	0.256321	1.16903	0.225311	1.1757	0.233524	12	0.0005434	0.00494086	2.3062	0.133875	TRUE
1154	YES-Calco10KCl0.5	1.00467	0.00672444	1.01326	0.0189981	0.999462	-0.000776059	1.00517	0.00743687	12	0.556174	0.826177	0.082927	0.0265153	FALSE
1154	YES-Calco2	0.988853	-0.0161724	0.997301	-0.00389874	0.996026	-0.00574486	1.00171	0.00246807	12	0.431606	0.781573	0.10703	0.0475011	FALSE
1154	YES-Calco4KCl0.5	1.00962	0.0138095	1.01824	0.0260832	1.01381	0.019781	1.01959	0.0279939	12	0.197361	0.623976	0.204832	0.0241379	FALSE
1154	YES-Cana120	0.951754	-0.0713397	0.959885	-0.059066	0.994397	-0.0081057	1.00007	0.000107229	11	0.322487	0.679356	0.167902	0.155005	FALSE
1154	YES-Cana60	1.00156	0.00225313	1.01012	0.0145268	1.00645	0.00927027	1.01219	0.0174832	12	0.909718	0.960258	0.0176119	0.0468401	FALSE
1154	YES-CoCl0.25	1.00127	0.0018269	1.00982	0.0141006	1.00953	0.0136862	1.0153	0.0218991	12	0.860145	0.973225	0.0117869	0.0241183	FALSE
1154	YES-CoCl5	0.996796	-0.00462917	1.00531	0.00764448	0.996177	-0.00552639	1.00186	0.00268654	12	0.388351	0.598271	0.223102	0.0116573	FALSE
1154	YES-Cycloh100	1.00169	0.00242955	1.01024	0.0147032	0.996965	-0.00438566	1.00266	0.00382728	12	0.769245	0.982015	0.00788197	0.0190481	FALSE
1154	YES-Cycloh200	0.996684	-0.00479245	1.0052	0.00748121	0.99938	-0.000894777	1.00509	0.00731816	12	0.675789	0.968433	0.0139306	0.0265901	FALSE
1154	YES-Cycloh400	1.00884	0.0126984	1.01746	0.0249721	1.00219	0.00315947	1.00791	0.0113724	12	0.300214	0.650867	0.186507	0.028085	FALSE
1154	YES-Cycloh600	1.00599	0.00861343	1.01458	0.0208871	1.00513	0.00738272	1.01087	0.0155957	12	0.174649	0.737408	0.132292	0.0138149	FALSE
1154	YES-Dhcumarin100	1.00299	0.00430335	1.01156	0.016577	1.00661	0.00950037	1.01235	0.0177133	11	0.592358	0.84411	0.0736011	0.0175538	FALSE
1154	YES-Dhcumarin200	0.998987	-0.0014615	1.00752	0.0108122	1.00112	0.00162061	1.00684	0.00983354	12	0.903072	0.93482	0.0292718	0.0280179	FALSE
1154	YES-Dhcumarin50	0.996454	-0.00512466	1.00497	0.00714899	0.996271	-0.00538989	1.00196	0.00282304	11	0.58402	0.802148	0.0957457	0.0205246	FALSE
1154	YES-EDTA0.1	1.01309	0.0187566	1.02174	0.0310302	1.0153	0.0219	1.02109	0.0301129	12	0.0517366	0.481845	0.317093	0.0206627	FALSE
1154	YES-EDTA0.3	1.00954	0.0136989	1.01817	0.0259725	1.01107	0.0158876	1.01685	0.0241006	12	0.0525014	0.347216	0.459401	0.0149184	FALSE
1154	YES-EDTA0.6	1.00882	0.0126694	1.01744	0.024943	1.01177	0.0168812	1.01755	0.0250941	12	0.178288	0.678455	0.168479	0.0210349	FALSE
1154	YES-EtOH5	1.00682	0.00979924	1.01542	0.0220729	1.01214	0.0174103	1.01792	0.0256232	12	0.389322	0.904825	0.0434353	0.0262052	FALSE
1154	YES-Forma2	0.996569	-0.00495846	1.00508	0.0073152	0.996283	-0.00537239	1.00197	0.00284054	12	0.598673	0.863908	0.0635324	0.0216578	FALSE
1154	YES-Forma3	0.983441	-0.0240899	0.991843	-0.0118162	0.994323	-0.00821293	1	0	11	0.264894	0.623046	0.20548	0.0467264	FALSE
1154	YES-HU30	0.999814	-0.00026779	1.00836	0.0120059	1.00427	0.00615216	1.01001	0.0143651	12	0.976341	0.984982	0.00657189	0.0208818	FALSE
1154	YES-HU45	0.99928	-0.00103977	1.00782	0.0112339	0.998287	-0.00247338	1.00399	0.00573956	12	0.893052	0.972933	0.0119169	0.017717	FALSE
1154	YES-KCl0.5SDS0.01	0.997605	-0.00345872	1.00613	0.00881493	1.00693	0.00995872	1.01268	0.0181717	12	0.831564	0.911522	0.040233	0.0381384	FALSE
1154	YES-KCl1SDS0.01	0.989269	-0.0155651	0.997721	-0.00329142	0.994639	-0.00775544	1.00032	0.000457498	12	0.453579	0.728594	0.137514	0.0480517	FALSE
1154	YES-Ovana3	1.04153	0.0586994	1.05042	0.070973	1.03629	0.0514301	1.04221	0.059643	9	0.240717	0.627738	0.202222	0.0990897	FALSE
1154	YES-Ovana6	0.992839	-0.0103683	1.00132	0.00190535	0.996527	-0.00501956	1.00222	0.00319337	9	0.531441	0.734758	0.133856	0.0329147	FALSE
1154	YES-SDS0.01	1.00683	0.00982186	1.01543	0.0220955	1.00615	0.00884372	1.01189	0.0170567	15	0.1949	0.544137	0.264292	0.0190026	FALSE
1154	YES-SDS0.02	0.997339	-0.00384354	1.00586	0.00843011	0.998209	-0.00258616	1.00391	0.00562677	11	0.614533	0.769854	0.113592	0.0165773	FALSE
1154	YES-TBH15	0.947569	-0.0776972	0.955665	-0.0654235	0.972775	-0.0398214	0.978329	-0.0316085	6	0.533553	0.80899	0.0920571	0.193796	FALSE
1154	YES-UV1000	0.986112	-0.0201769	0.994537	-0.00790326	0.994323	-0.00821293	1	0	10	0.263038	0.839481	0.0759889	0.0369111	FALSE
1154	YES-UV10m	0.986575	-0.0194998	0.995004	-0.00722614	0.994323	-0.00821293	1	0	12	0.257691	0.638625	0.194754	0.0390636	FALSE
1154	YES-UV2000	1.01461	0.0209321	1.02328	0.0332058	1.02439	0.0347662	1.03024	0.0429791	11	0.108145	0.637223	0.195708	0.0274743	FALSE
1154	YES-UV20m	0.992631	-0.0106706	1.00111	0.00160306	0.997987	-0.00290687	1.00368	0.00530606	12	0.475735	0.799267	0.0973079	0.0345837	FALSE
1154	YES-UV3000	0.995691	-0.00622955	1.0042	0.00604411	0.995305	-0.00678984	1.00099	0.00142309	12	0.334548	0.926811	0.0330089	0.0142677	FALSE
1154	YES-UV4000	0.994571	-0.00785328	1.00307	0.00442037	0.994323	-0.00821293	1	0	9	0.421091	0.780054	0.107876	0.0190169	FALSE
1154	YES-UV5m	0.986184	-0.0200708	0.99461	-0.00779717	0.993867	-0.00887567	0.999541	-0.000662733	12	0.0976162	0.57446	0.24074	0.0263876	FALSE
1154	YES-UV6000	0.99725	-0.0039735	1.00577	0.00830015	0.99986	-0.000202688	1.00557	0.00801025	12	0.460183	0.749442	0.125262	0.0117407	FALSE
1154	YES-UV9000	0.994925	-0.00734052	1.00343	0.00493314	0.99885	-0.00165962	1.00455	0.00655331	12	0.24378	0.561733	0.25047	0.0137565	FALSE
1154	YES-VPA5	0.97436	-0.0374735	0.982684	-0.0251999	0.980018	-0.0291198	0.985613	-0.0209069	12	0.00478295	0.0681571	1.16649	0.025401	FALSE
1154	YESphlox-Act0.1	0.987507	-0.0181366	0.998126	-0.00270613	0.99266	-0.0106279	1	0	16	0.252287	0.824511	0.0838034	0.0415475	FALSE
1154	YESphlox-Act1	1.01036	0.0148704	1.02123	0.0303009	1.00546	0.00785969	1.0129	0.0184876	16	0.475034	0.913949	0.0390778	0.0564835	FALSE
1154	YESphlox-Act2	1.01689	0.0241633	1.02782	0.0395938	1.01677	0.0239964	1.02429	0.0346243	16	0.188184	0.780951	0.107376	0.0488094	FALSE
1154	YESphlox-stationary7	1.00286	0.0041228	1.01365	0.0195533	1.00166	0.00239642	1.00907	0.0130243	24	0.503993	0.880436	0.055302	0.0176781	FALSE
1154	YESphlox-Benza12	0.995811	-0.00605675	1.00652	0.00937374	0.99266	-0.0106279	1	0	12	0.584041	0.951152	0.0217501	0.0248728	FALSE
1154	YESphlox-Benza4	0.993764	-0.00902457	1.00445	0.00640593	0.998336	-0.00240303	1.00572	0.00822487	12	0.146734	0.663592	0.178099	0.0120891	FALSE
1154	YESphlox-Benza8	0.993814	-0.00895178	1.0045	0.00647872	0.996455	-0.00512287	1.00382	0.00550503	12	0.162565	0.545994	0.262812	0.0126242	FALSE
1154	YESphlox-Bort500	0.987456	-0.0182114	0.998074	-0.00278089	0.99266	-0.0106279	1	0	12	0.210097	0.449458	0.347311	0.0322365	FALSE
1154	YESphlox-CdCl1	1.02498	0.0355937	1.036	0.0510242	1.01833	0.026201	1.02586	0.0368289	6	0.204777	0.835165	0.0782275	0.0422709	FALSE
1154	YESphlox-Diamide2	0.992646	-0.0106492	1.00332	0.00478132	0.993366	-0.00960203	1.00071	0.00102587	12	0.353227	0.743589	0.128667	0.0255241	FALSE
1154	YESphlox-Diamide3	1.00785	0.0112847	1.01869	0.0267152	0.993949	-0.00875585	1.0013	0.00187204	12	0.522861	0.800079	0.0968669	0.0409754	FALSE
1154	YESphlox-Diamide3.5	0.992804	-0.0104188	1.00348	0.00501172	0.993421	-0.00952215	1.00077	0.00110574	12	0.102687	0.278721	0.55483	0.0124071	FALSE
1154	YESphlox-EDTA4	0.98961	-0.0150685	1.00025	0.000361983	0.99266	-0.0106279	1	0	12	0.303118	0.757415	0.120666	0.0328829	FALSE
1154	YESphlox-EGTA1	1.00374	0.00537954	1.01453	0.02081	1.01135	0.0162788	1.01883	0.0269067	12	0.530142	0.928347	0.0322898	0.0187024	FALSE
1154	YESphlox-EGTA10	0.987417	-0.0182683	0.998035	-0.00283777	0.991754	-0.0119465	0.999086	-0.00131861	12	0.662696	0.812337	0.0902639	0.0979977	FALSE
1154	YESphlox-EGTA15	1.02088	0.0298138	1.03186	0.0452443	1.0161	0.0230471	1.02362	0.033675	5	0.590616	0.969582	0.0134153	0.0807066	FALSE
1154	YESphlox-EGTA5	1.01047	0.0150197	1.02133	0.0304502	1.01865	0.0266523	1.02618	0.0372802	12	0.0438894	0.454854	0.342128	0.0148875	FALSE
1154	YESphlox-EtOH0.1	1.00283	0.00407007	1.01361	0.0195006	1.0067	0.00962837	1.01414	0.0202563	16	0.904878	0.985275	0.00644254	0.0935484	FALSE
1154	YESphlox-EtOH10	1.00615	0.00885202	1.01697	0.0242825	1.01647	0.0235617	1.02398	0.0341896	11	0.758016	0.956864	0.0191498	0.0647472	FALSE
1154	YESphlox-Forma2.5	0.997917	-0.00300796	1.00865	0.0124225	0.994988	-0.00724876	1.00234	0.00337914	12	0.815971	0.958617	0.018355	0.0296118	FALSE
1154	YESphlox-Gluc0.1stationary7	0.990183	-0.0142333	1.00083	0.00119724	0.992861	-0.0103369	1.0002	0.000291023	24	0.0541746	0.191304	0.718276	0.0216278	FALSE
1154	YESphlox-Gluc0.5stationary7	0.997362	-0.0038108	1.00809	0.0116197	1.00617	0.00888072	1.01361	0.0195086	46	0.60672	0.753399	0.122975	0.0312054	FALSE
1154	YESphlox-Gluc1stationary7	0.995379	-0.00668186	1.00608	0.00874864	0.99657	-0.00495735	1.00394	0.00567055	22	0.27292	0.605642	0.217784	0.0164266	FALSE
1154	YESphlox-Glycerol2	0.994696	-0.00767275	1.00539	0.00775774	0.997316	-0.00387752	1.00469	0.00675037	12	0.22657	0.679709	0.167677	0.0125574	FALSE
1154	YESphlox-Glycerol2MMS0.0075	0.998064	-0.0027957	1.0088	0.0126348	1.0034	0.00489541	1.01082	0.0155233	12	0.871355	0.941189	0.0263234	0.0401647	FALSE
1154	YESphlox-Glycerol3	0.996207	-0.00548283	1.00692	0.00994767	0.992906	-0.0102714	1.00025	0.000356489	12	0.4033	0.818711	0.0868694	0.0133092	FALSE
1154	YESphlox-Glycerol3MMS0.005	1.00462	0.00664732	1.01542	0.0220778	0.998345	-0.00238978	1.00573	0.00823812	12	0.502431	0.690086	0.161097	0.0220662	FALSE
1154	YESphlox-HP10	0.995952	-0.00585234	1.00666	0.00957815	0.99266	-0.0106279	1	0	24	0.805219	0.898422	0.0465194	0.079581	FALSE
1154	YESphlox-HP15	0.98516	-0.0215707	0.995753	-0.00614024	1.00342	0.00491905	1.01083	0.0155469	10	0.51675	0.817478	0.0875238	0.0699678	FALSE
1154	YESphlox-HP2	0.992676	-0.0106053	1.00335	0.00482521	1.00026	0.000369181	1.00765	0.0109971	24	0.265626	0.720995	0.142068	0.0298702	FALSE
1154	YESphlox-HP4	1.00832	0.0119517	1.01916	0.0273822	1.0116	0.0166359	1.01908	0.0272638	36	0.096138	0.320505	0.494165	0.0263428	FALSE
1154	YESphlox-HP6	1.00733	0.0105311	1.01816	0.0259616	1.00158	0.00228212	1.00899	0.01291	36	0.198956	0.428057	0.368498	0.0311434	FALSE
1154	YESphlox-HP8	1.00922	0.0132404	1.02007	0.0286709	0.994603	-0.00780702	1.00196	0.00282087	29	0.458966	0.789441	0.102681	0.0657091	FALSE
1154	YESphlox-HU8	0.999115	-0.00127776	1.00986	0.0141527	0.998256	-0.00251867	1.00564	0.00810923	12	0.881777	0.930764	0.0311603	0.0188465	FALSE
1154	YESphlox-HU8MMS0.075	1.00104	0.00149639	1.0118	0.0169269	1.0109	0.0156413	1.01838	0.0262692	12	0.910853	0.968538	0.0138834	0.0307668	FALSE
1154	YESphlox-KCl0.5	0.999023	-0.00141023	1.00977	0.0140203	1.00269	0.0038808	1.01011	0.0145087	12	0.896673	0.953722	0.0205784	0.0245603	FALSE
1154	YESphlox-KCl0.5SDS0.004	1.00549	0.00790155	1.0163	0.023332	1.00447	0.00642782	1.01189	0.0170557	12	0.646593	0.871685	0.0596405	0.0400785	FALSE
1154	YESphlox-KCl1	0.995631	-0.00631685	1.00634	0.00911365	1.00367	0.00528624	1.01109	0.0159141	12	0.690776	0.81184	0.0905295	0.0366642	FALSE
1154	YESphlox-LiCl4	1.00863	0.0124004	1.01948	0.0278309	1.00651	0.00936657	1.01396	0.0199945	12	0.1967	0.607397	0.216527	0.0208308	FALSE
1154	YESphlox-LiCl6	1.00084	0.00121709	1.01161	0.0166476	0.999343	-0.000948358	1.00673	0.00967954	12	0.905463	0.938523	0.027555	0.0230613	FALSE
1154	YESphlox-MMS0.005	1.00778	0.011178	1.01861	0.0266085	1.00867	0.012448	1.01612	0.0230759	12	0.488555	0.743253	0.128863	0.0372561	FALSE
1154	YESphlox-MMS0.075	1.01887	0.0269748	1.02983	0.0424053	1.01298	0.0186069	1.02047	0.0292348	24	0.0301246	0.0903738	1.04396	0.0392054	FALSE
1154	YESphlox-NaCl150	0.992775	-0.0104615	1.00345	0.004969	1.00122	0.00176502	1.00863	0.0123929	12	0.200915	0.743793	0.128548	0.0171841	FALSE
1154	YESphlox-NaCl150MMS0.005	1.0066	0.00948605	1.01742	0.0249165	1.01092	0.0156661	1.01839	0.026294	12	0.180206	0.570653	0.243628	0.0145023	FALSE
1154	YESphlox-Ovana0.5	1.00878	0.0126061	1.01962	0.0280366	1.00703	0.0101103	1.01448	0.0207382	12	0.174414	0.62135	0.206663	0.0199756	FALSE
1154	YESphlox-Ovana1	1.01461	0.0209182	1.02552	0.0363487	1.0181	0.0258756	1.02563	0.0365035	11	0.0786521	0.389841	0.409113	0.0242975	FALSE
1154	YESphlox-Ovana4	0.993513	-0.00938912	1.0042	0.00604138	1.01707	0.0244215	1.02459	0.0350493	9	0.804338	0.935089	0.0291471	0.0765306	FALSE
1154	YESphlox-Phloxine2	0.996571	-0.00495522	1.00729	0.0104753	1.00139	0.00200363	1.00879	0.0126315	11	0.5041	0.92696	0.0329388	0.0149412	FALSE
1154	YESphlox-Phloxine2HP10	0.99218	-0.0113262	1.00285	0.00410428	0.985012	-0.0217867	0.992295	-0.0111588	12	0.434444	0.68282	0.165694	0.0329192	FALSE
1154	YESphlox-Phloxine2HP15	0.993536	-0.00935558	1.00422	0.00607492	1.00263	0.00379551	1.01005	0.0144234	9	0.880195	0.946461	0.0238972	0.125786	FALSE
1154	YESphlox-SDS0.004	0.989458	-0.0152891	1.0001	0.00014143	0.991992	-0.0115998	0.999327	-0.000971935	12	0.0259655	0.493345	0.306849	0.0131087	FALSE
1154	YESphlox-TBH1	0.98867	-0.0164394	0.999301	-0.00100886	0.991624	-0.0121348	0.998956	-0.00150694	12	0.0352877	0.191562	0.717692	0.01543	FALSE
1154	YESphlox-TBH1.5	1.02765	0.0393542	1.0387	0.0547847	0.996721	-0.00473836	1.00409	0.00588954	6	0.752062	0.872803	0.0590839	0.205037	FALSE
1154	YESphlox-TSA1000	0.994207	-0.00838254	1.0049	0.00704796	0.996221	-0.00546207	1.00359	0.00516583	12	0.327998	0.779636	0.108108	0.0183987	FALSE
1154	YESphlox-TSA500	0.998787	-0.00175174	1.00953	0.0136788	1.00495	0.0071289	1.01238	0.0177568	12	0.797673	0.926563	0.0331252	0.0142161	FALSE
1154	YESphlox-TeaTree1	0.995384	-0.00667427	1.00609	0.00875623	0.998267	-0.00250194	1.00565	0.00812595	12	0.469471	0.733147	0.134809	0.0202181	FALSE
1154	YESphlox-TeaTree10	1.00663	0.00953941	1.01746	0.0249699	1.0003	0.000434424	1.0077	0.0110623	12	0.41963	0.797297	0.0983797	0.0266842	FALSE
1154	YESphlox-TeaTree100	0.995102	-0.00708401	1.0058	0.00834649	0.995812	-0.00605514	1.00317	0.00457275	12	0.245883	0.834356	0.0786486	0.0119353	FALSE
1154	YESphlox-Temp25	1.00661	0.00950316	1.01743	0.0249337	1.01038	0.0148948	1.01785	0.0255227	12	0.278031	0.737788	0.132068	0.0189286	FALSE
1154	YESphlox-Temp25Gluc0.1	0.984486	-0.0225578	0.995072	-0.00712732	0.985428	-0.021178	0.992714	-0.0105501	24	0.0241863	0.0911015	1.04047	0.0302763	FALSE
1154	YESphlox-Temp25Gluc0.5	0.988049	-0.0173452	0.998674	-0.00191472	0.998194	-0.00260848	1.00557	0.00801941	24	0.19783	0.4299	0.366633	0.0433146	FALSE
1154	YESphlox-Temp25Gluc1	0.991472	-0.0123555	1.00213	0.00307503	0.992686	-0.010591	1.00003	3.68926e-05	24	0.0466559	0.161589	0.791589	0.017229	FALSE
1154	YESphlox-Temp25Gluc3	1.00706	0.010153	1.01789	0.0255835	1.00665	0.00955809	1.01409	0.020186	12	0.230714	0.834119	0.0787722	0.0181209	FALSE
1154	YESphlox-Tuni20	1.0442	0.0624043	1.05543	0.0778348	1.01317	0.0188699	1.02066	0.0294978	10	0.298688	0.786343	0.104388	0.127948	FALSE
1154	YESphlox-Tuni40	0.979074	-0.0305109	0.989602	-0.0150804	0.988017	-0.0173926	0.995322	-0.00676473	9	0.253869	0.763737	0.117056	0.0512867	FALSE
1154	YESphlox-Tuni60	0.992574	-0.0107538	1.00325	0.00467667	1.00519	0.00746291	1.01262	0.0180908	6	0.864429	0.977931	0.00969185	0.102178	FALSE
1154	YESphlox-Tuni80	1.00429	0.00617088	1.01509	0.0216014	0.999227	-0.00111568	1.00662	0.00951222	10	0.79705	0.908114	0.0418596	0.0512551	FALSE
1154	YESphlox-VPA10	0.950494	-0.0732505	0.960715	-0.05782	0.959684	-0.059368	0.96678	-0.0487401	10	0.00359395	0.0419294	1.37748	0.0406861	FALSE
1154	YESphlox-VPA8	0.977044	-0.0335041	0.98755	-0.0180736	0.980172	-0.0288939	0.987419	-0.018266	9	0.00734211	0.0761613	1.11827	0.0196344	FALSE
1154	YESphlox-Xylose2	0.996957	-0.00439643	1.00768	0.0110341	0.998559	-0.00208038	1.00594	0.00854751	10	0.696743	0.863356	0.0638103	0.0231602	FALSE
1154	Yesphlox-Caffeine10	1.05197	0.0730996	1.06329	0.0885301	1.05263	0.0739968	1.06041	0.0846247	14	0.226814	0.731691	0.135672	0.154742	FALSE
1154	Yesphlox-DMSO	0.997516	-0.00358877	1.00824	0.0118417	1.00379	0.00545871	1.01121	0.0160866	16	0.828559	0.997352	0.00115156	0.0446874	FALSE
1154	Yesphlox-Gal2	1.01128	0.0161842	1.02216	0.0316147	1.0137	0.0196282	1.02119	0.0302561	16	0.291888	0.637663	0.195409	0.04085	FALSE
1154	Yesphlox-Rapa1	1.00933	0.0134031	1.02019	0.0288336	0.994288	-0.008264	1.00164	0.00236389	14	0.557973	0.877527	0.0567396	0.0581206	FALSE
1154	Yesphlox-Rapa100	1.00966	0.0138694	1.02052	0.0292999	1.00641	0.00921846	1.01385	0.0198464	16	0.746498	0.864456	0.0632572	0.118269	FALSE
1154	Yesphlox-Sorb1.2	0.997485	-0.00363237	1.00821	0.0117981	1.00474	0.00682806	1.01217	0.017456	14	0.837164	0.957613	0.01881	0.044576	FALSE
1154	Yesphlox-Torin5	1.02973	0.0422606	1.0408	0.0576911	1.04114	0.0581609	1.04884	0.0687888	16	0.164642	0.606747	0.216992	0.0818392	FALSE
1164	EMM-3AT4	1.03003	0.0426876	1.03866	0.0547179	0.998586	-0.00204209	1.00393	0.00565384	9	0.525745	0.826728	0.0826375	0.135906	FALSE
1164	EMM-3AT6	0.982689	-0.0251932	0.990918	-0.0131629	0.992356	-0.0110701	0.997664	-0.00337418	9	0.151678	0.575371	0.240052	0.0292821	FALSE
1164	EMM-Bleo200	0.982592	-0.0253361	0.99082	-0.0133058	0.984539	-0.0224805	0.989804	-0.0147845	9	0.085991	0.273924	0.562369	0.0224965	FALSE
1164	EMM-Canav60	1.00209	0.0030059	1.01048	0.0150362	1.00333	0.00479245	1.00869	0.0124884	9	0.81112	0.98676	0.00578848	0.0183669	FALSE
1164	EMM-Cys	0.997314	-0.00387996	1.00567	0.00815033	0.999678	-0.000463952	1.00503	0.00723198	18	0.830151	0.918808	0.0367753	0.0461	FALSE
1164	EMM-Met	0.996181	-0.00552036	1.00452	0.00650992	0.983947	-0.0233477	0.98921	-0.0156518	18	0.812087	0.890538	0.0503474	0.0626519	FALSE
1164	EMMphlox-Act0.1	0.982387	-0.0256364	1.01549	0.0221787	0.988223	-0.0170917	1.0084	0.0120734	12	0.175662	0.623601	0.205093	0.0354445	FALSE
1164	EMMphlox-Act1	0.969975	-0.0439813	1.00266	0.00383385	0.979987	-0.0291651	1	0	12	0.10365	0.462228	0.335144	0.0557958	FALSE
1164	EMMphlox-Act2	0.979699	-0.0295899	1.01271	0.0182252	0.986129	-0.0201524	1.00627	0.00901272	12	0.384637	0.796081	0.0990426	0.0759701	FALSE
1164	EMMphlox-Cana75	0.981521	-0.026909	1.0146	0.0209062	0.993944	-0.00876424	1.01424	0.0204009	18	0.0360971	0.252101	0.598425	0.0141557	FALSE
1164	EMMphlox-EtOH0.1	0.964625	-0.0519598	0.997131	-0.00414471	0.986575	-0.0194992	1.00672	0.00966592	12	0.12015	0.855105	0.0679805	0.07137	FALSE
1164	YES-Bleo200	1.00362	0.00521174	1.01673	0.0239402	1.00525	0.00755702	1.01283	0.0183869	9	0.72996	0.929555	0.0317247	0.0294201	FALSE
1164	YES-Bleo300	0.996935	-0.00442824	1.00996	0.0143002	0.997726	-0.00328468	1.00524	0.00754517	3	0.78825	0.929957	0.031537	0.0170788	FALSE
1164	YES-Bleo600	1.001	0.0014437	1.01408	0.0201722	1.00004	5.45584e-05	1.00757	0.0108844	6	0.910707	0.952483	0.0211428	0.0198228	FALSE
1164	YES-Bortezomib100	1.00064	0.000922257	1.01371	0.0196507	1.00862	0.0123821	1.01622	0.023212	9	0.914595	0.949392	0.0225543	0.0149912	FALSE
1164	YES-Bortezomib200	1.00064	0.000930232	1.01372	0.0196587	1.00752	0.0108015	1.01511	0.0216313	9	0.892129	0.900024	0.0457459	0.0105599	FALSE
1164	YES-Bref60	0.999316	-0.000986899	1.01237	0.0177416	1.00164	0.00236363	1.00919	0.0131935	9	0.988318	0.988318	0.00510345	0.137285	FALSE
1164	YES-Calco10KCl0.5	0.968012	-0.0469026	0.980661	-0.0281741	0.972593	-0.0400924	0.979921	-0.0292626	9	0.229921	0.557682	0.253614	0.0743804	FALSE
1164	YES-Calco2	1.03918	0.0554388	1.05275	0.0741673	1.07002	0.0976327	1.07808	0.108463	9	0.0181806	0.15943	0.79743	0.0401476	FALSE
1164	YES-Calco4KCl0.5	1.00971	0.0139423	1.0229	0.0326707	1.01431	0.0205042	1.02196	0.0313341	9	0.0738729	0.443238	0.353363	0.0123251	FALSE
1164	YES-Cana120	1.03534	0.050106	1.04887	0.0688345	1.05386	0.0756896	1.06181	0.0865194	9	0.0140057	0.373089	0.428187	0.0342685	FALSE
1164	YES-Cana60	1.0367	0.0519957	1.05024	0.0707242	1.05429	0.0762684	1.06223	0.0870982	9	0.0292645	0.394972	0.403434	0.0418665	FALSE
1164	YES-CoCl0.25	1.00194	0.00280228	1.01504	0.0215308	1.00018	0.000265569	1.00772	0.0110954	9	0.823358	0.967658	0.0142783	0.02396	FALSE
1164	YES-CoCl5	0.993397	-0.00955737	1.00638	0.00917111	1.00057	0.00081688	1.00811	0.0116467	9	0.267237	0.534475	0.272073	0.0145572	FALSE
1164	YES-Cycloh100	0.991079	-0.0129286	1.00403	0.00579984	0.99226	-0.0112095	0.999737	-0.000379675	9	0.250995	0.773336	0.111632	0.0202965	FALSE
1164	YES-Cycloh200	0.991296	-0.012612	1.00425	0.00611644	0.992919	-0.0102517	1.0004	0.000578114	9	0.136108	0.530339	0.275447	0.0138944	FALSE
1164	YES-Cycloh400	0.991557	-0.0122325	1.00451	0.00649595	0.996056	-0.0057013	1.00356	0.00512854	9	0.111348	0.470135	0.327777	0.0120421	FALSE
1164	YES-Cycloh600	0.982668	-0.025224	0.995508	-0.00649555	0.988219	-0.0170968	0.995666	-0.00626693	9	0.000492594	0.0280779	1.55164	0.0094754	FALSE
1164	YES-Dhcumarin100	1.01357	0.0194433	1.02681	0.0381717	1.0124	0.0177767	1.02003	0.0286066	9	0.152302	0.482289	0.316693	0.0249234	FALSE
1164	YES-Dhcumarin200	1.00777	0.0111661	1.02094	0.0298946	1.01611	0.0230502	1.02376	0.03388	8	0.456312	0.764994	0.116342	0.027061	FALSE
1164	YES-Dhcumarin50	1.00402	0.00578225	1.01713	0.0245107	1.00796	0.0114411	1.01556	0.0222709	9	0.44906	0.731326	0.135889	0.0125089	FALSE
1164	YES-EDTA0.1	1.00505	0.0072688	1.01818	0.0259973	1.01038	0.014893	1.01799	0.0257228	9	0.48311	0.782967	0.106256	0.0189227	FALSE
1164	YES-EDTA0.3	0.994087	-0.00855663	1.00708	0.0101719	0.999515	-0.000699424	1.00705	0.0101304	9	0.21267	0.594433	0.225897	0.0102434	FALSE
1164	YES-EDTA0.6	0.999129	-0.00125699	1.01218	0.0174715	0.999201	-0.00115299	1.00673	0.00967686	9	0.889592	0.947789	0.0232881	0.0160565	FALSE
1164	YES-EtOH5	1.00457	0.00658164	1.0177	0.0253101	1.01697	0.0242719	1.02463	0.0351018	9	0.495679	0.904825	0.0434353	0.0173421	FALSE
1164	YES-Forma2	0.984907	-0.0219403	0.997776	-0.00321181	0.99031	-0.0140484	0.997772	-0.00321853	9	0.0824777	0.376098	0.424699	0.0220577	FALSE
1164	YES-Forma3	0.981369	-0.0271319	0.994192	-0.00840342	0.98283	-0.0249857	0.990236	-0.0141559	9	0.00383246	0.0873801	1.05859	0.0139419	FALSE
1164	YES-HU30	0.996574	-0.00495053	1.0096	0.013778	0.995959	-0.00584148	1.00346	0.00498837	9	0.560786	0.687416	0.162781	0.0146296	FALSE
1164	YES-HU45	0.999615	-0.000554896	1.01268	0.0181736	1.00388	0.00558089	1.01144	0.0164107	9	0.959306	0.972933	0.0119169	0.0202456	FALSE
1164	YES-KCl0.5SDS0.01	1.03482	0.0493748	1.04834	0.0681033	1.04516	0.0637213	1.05303	0.0745512	9	0.00102109	0.0232809	1.633	0.0221175	FALSE
1164	YES-KCl1SDS0.01	1.0666	0.0930239	1.08054	0.111752	1.06801	0.0949293	1.07606	0.105759	9	0.000482486	0.00916723	2.03776	0.0370682	TRUE
1164	YES-Ovana3	1.01711	0.0244803	1.0304	0.0432088	1.00608	0.00873865	1.01366	0.0195685	8	0.433551	0.683316	0.165378	0.0584902	FALSE
1164	YES-Ovana6	0.975715	-0.0354678	0.988464	-0.0167393	0.992521	-0.0108298	1	0	8	0.349519	0.669246	0.174414	0.0689847	FALSE
1164	YES-SDS0.01	1.04186	0.0591641	1.05548	0.0778926	1.05765	0.0808652	1.06562	0.091695	12	0.0334824	0.416502	0.380383	0.0600174	FALSE
1164	YES-SDS0.02	0.98111	-0.0275135	0.993929	-0.00878504	0.992521	-0.0108298	1	0	8	0.0114862	0.0770249	1.11337	0.0158143	FALSE
1164	YES-TBH15	0.871867	-0.19782	0.883259	-0.179092	0.834817	-0.260468	0.841107	-0.249638	4	0.112303	0.767263	0.115056	0.116666	FALSE
1164	YES-UV1000	1.02061	0.0294249	1.03394	0.0481534	1.01262	0.0180885	1.02025	0.0289183	9	0.614191	0.959147	0.0181146	0.119081	FALSE
1164	YES-UV10m	0.985347	-0.0212955	0.998222	-0.00256703	0.993344	-0.00963505	1.00083	0.0011948	9	0.194092	0.633207	0.198454	0.030419	FALSE
1164	YES-UV2000	1.00493	0.00708826	1.01806	0.0258167	0.992521	-0.0108298	1	0	9	0.819418	0.936936	0.0282901	0.062804	FALSE
1164	YES-UV20m	0.992426	-0.0109686	1.00539	0.00775988	1.00012	0.000169967	1.00765	0.0109998	8	0.256301	0.596291	0.224541	0.0157939	FALSE
1164	YES-UV3000	0.994833	-0.00747405	1.00783	0.0112544	0.993735	-0.0090676	1.00122	0.00176224	9	0.532051	0.926811	0.0330089	0.0223603	FALSE
1164	YES-UV4000	0.981353	-0.0271558	0.994176	-0.00842734	0.992521	-0.0108298	1	0	7	0.00886319	0.250385	0.601391	0.0134672	FALSE
1164	YES-UV5m	0.988061	-0.0173275	1.00097	0.00140099	0.986502	-0.0196056	0.993936	-0.00877579	9	0.210696	0.622864	0.205606	0.0254376	FALSE
1164	YES-UV6000	1.01457	0.0208639	1.02782	0.0395924	1.00265	0.00381505	1.0102	0.0146449	9	0.302477	0.658943	0.181152	0.0393054	FALSE
1164	YES-UV9000	1.00496	0.00714199	1.01809	0.0258705	1.00459	0.00660279	1.01216	0.0174326	9	0.55617	0.805716	0.093818	0.0228984	FALSE
1164	YES-VPA5	1.03927	0.0555713	1.05285	0.0742998	1.0439	0.0619771	1.05176	0.072807	8	0.000651996	0.0148655	1.82782	0.0210735	FALSE
1164	YESphlox-Act0.1	0.998109	-0.00273054	1.02219	0.0316576	0.988615	-0.0165188	1.00553	0.0079613	12	0.905617	0.988849	0.00486994	0.0537624	FALSE
1164	YESphlox-Act1	0.982837	-0.0249763	1.00655	0.00941183	1.00133	0.00192155	1.01847	0.0264017	12	0.331623	0.913949	0.0390778	0.0586867	FALSE
1164	YESphlox-Act2	0.981138	-0.027472	1.00481	0.00691609	0.989558	-0.0151432	1.00649	0.00933691	12	0.0717784	0.656468	0.182786	0.0318412	FALSE
1164	YESphlox-stationary7	1.00693	0.00996249	1.03122	0.0443506	1.0085	0.0122069	1.02576	0.036687	18	0.268316	0.864877	0.0630456	0.021133	FALSE
1164	YESphlox-Benza12	0.985266	-0.0214142	1.00903	0.012974	0.985217	-0.0214867	1.00208	0.00299345	9	0.124833	0.490724	0.309163	0.0247978	FALSE
1164	YESphlox-Benza4	0.982853	-0.0249521	1.00656	0.00943601	0.991093	-0.0129074	1.00805	0.0115727	9	0.002173	0.156564	0.805309	0.0108083	FALSE
1164	YESphlox-Benza8	1.00207	0.00297993	1.02624	0.0373681	1.00811	0.0116547	1.02536	0.0361348	9	0.788163	0.918102	0.0371093	0.0200348	FALSE
1164	YESphlox-Bort500	0.986733	-0.0192685	1.01054	0.0151196	0.992984	-0.0101572	1.00998	0.0143229	9	0.0293119	0.151889	0.818475	0.0131775	FALSE
1164	YESphlox-CdCl1	1.0442	0.062392	1.06938	0.0967802	1.00501	0.00721646	1.02221	0.0316966	6	0.379576	0.835165	0.0782275	0.114829	FALSE
1164	YESphlox-Diamide2	1.00619	0.00889615	1.03046	0.0432843	1.00524	0.0075347	1.02244	0.0320148	9	0.576857	0.84962	0.0707751	0.0308522	FALSE
1164	YESphlox-Diamide3	1.0146	0.0209145	1.03908	0.0553026	1.01371	0.0196381	1.03105	0.0441182	9	0.312859	0.660565	0.180085	0.0404077	FALSE
1164	YESphlox-Diamide3.5	0.980949	-0.0277494	1.00461	0.00663868	0.994877	-0.00741059	1.0119	0.0170695	9	0.12096	0.299772	0.52321	0.0325545	FALSE
1164	YESphlox-EDTA4	1.00047	0.000679045	1.0246	0.0350672	1.02515	0.0358306	1.04269	0.0603107	9	0.965843	0.996734	0.00142056	0.0308329	FALSE
1164	YESphlox-EGTA1	0.997566	-0.00351541	1.02163	0.0308727	1.00028	0.000409771	1.0174	0.0248899	9	0.728832	0.98026	0.00865871	0.0176789	FALSE
1164	YESphlox-EGTA10	0.945593	-0.0807092	0.968403	-0.046321	0.972387	-0.0403968	0.989028	-0.0159167	9	0.026284	0.176257	0.753853	0.0612976	FALSE
1164	YESphlox-EGTA15	1.02072	0.0295804	1.04534	0.0639685	1.01669	0.0238817	1.03409	0.0483618	3	0.435438	0.969582	0.0134153	0.0379147	FALSE
1164	YESphlox-EGTA5	0.997747	-0.00325435	1.02181	0.0311338	1.0022	0.00317215	1.01935	0.0276523	9	0.733112	0.96353	0.0161349	0.0162094	FALSE
1164	YESphlox-EtOH0.1	0.989103	-0.0158068	1.01296	0.0185814	1.00257	0.00370054	1.01973	0.0281806	12	0.565312	0.973123	0.0118322	0.0639689	FALSE
1164	YESphlox-EtOH10	0.993909	-0.00881458	1.01788	0.0255735	1.00198	0.00285075	1.01912	0.0273309	9	0.792446	0.956864	0.0191498	0.0679102	FALSE
1164	YESphlox-Forma2.5	0.993211	-0.00982768	1.01717	0.0245604	0.998543	-0.00210385	1.01563	0.0223763	9	0.183738	0.518141	0.285552	0.0100457	FALSE
1164	YESphlox-Gluc0.1stationary7	0.991289	-0.0126217	1.0152	0.0217664	0.994389	-0.00811833	1.01141	0.0163618	18	0.175597	0.405794	0.391694	0.0219042	FALSE
1164	YESphlox-Gluc0.5stationary7	0.990454	-0.0138374	1.01435	0.0205507	0.998759	-0.00179177	1.01585	0.0226883	36	0.0379533	0.0953049	1.02088	0.0154582	FALSE
1164	YESphlox-Gluc1stationary7	0.99246	-0.0109197	1.0164	0.0234684	0.999331	-0.000965804	1.01643	0.0235143	17	0.180296	0.50677	0.29519	0.0170632	FALSE
1164	YESphlox-Glycerol2	0.988172	-0.0171659	1.01201	0.0172222	0.991026	-0.0130053	1.00799	0.0114748	9	0.119196	0.566181	0.247045	0.0186592	FALSE
1164	YESphlox-Glycerol2MMS0.0075	1.02279	0.0325169	1.04747	0.066905	1.02434	0.0346942	1.04187	0.0591743	9	0.156696	0.36498	0.437731	0.0438685	FALSE
1164	YESphlox-Glycerol3	0.995933	-0.00587883	1.01996	0.0285093	1.00019	0.000278726	1.01731	0.0247588	9	0.598235	0.868674	0.0611429	0.0200134	FALSE
1164	YESphlox-Glycerol3MMS0.005	1.02453	0.0349679	1.04925	0.069356	1.01783	0.0254899	1.03524	0.04997	9	0.123694	0.323277	0.490425	0.0429339	FALSE
1164	YESphlox-HP10	1.01371	0.0196413	1.03816	0.0540294	1.03423	0.0485611	1.05193	0.0730412	16	0.684442	0.898422	0.0465194	0.134669	FALSE
1164	YESphlox-HP15	0.992192	-0.0113089	1.01613	0.0230792	0.984296	-0.0228358	1.00114	0.00164435	8	0.875649	0.947089	0.0236093	0.138974	FALSE
1164	YESphlox-HP2	0.998946	-0.00152114	1.02304	0.032867	0.998867	-0.00163494	1.01596	0.0228452	18	0.92113	0.987645	0.00539905	0.042628	FALSE
1164	YESphlox-HP4	1.0121	0.0173499	1.03651	0.0517381	1.01433	0.0205201	1.03168	0.0450003	27	0.236102	0.523469	0.281109	0.0494205	FALSE
1164	YESphlox-HP6	1.00833	0.0119665	1.03265	0.0463546	1.004	0.00575583	1.02118	0.0302359	27	0.458321	0.673848	0.171438	0.0554832	FALSE
1164	YESphlox-HP8	1.05399	0.0758631	1.07942	0.110251	1.0252	0.0359051	1.04274	0.0603852	21	0.0370701	0.526395	0.278688	0.112409	FALSE
1164	YESphlox-HU8	1.02522	0.0359362	1.04995	0.0703243	1.02724	0.0387801	1.04482	0.0632602	9	0.025066	0.190502	0.720101	0.0275713	FALSE
1164	YESphlox-HU8MMS0.075	0.997361	-0.00381234	1.02142	0.0305758	0.998922	-0.00155538	1.01602	0.0229247	9	0.740595	0.968538	0.0138834	0.0209513	FALSE
1164	YESphlox-KCl0.5	0.998182	-0.00262592	1.02226	0.0317622	1.0079	0.0113557	1.02515	0.0358358	9	0.780645	0.927016	0.0329127	0.0159397	FALSE
1164	YESphlox-KCl0.5SDS0.004	1.00671	0.00965337	1.031	0.0440415	1.00754	0.0108347	1.02478	0.0353148	9	0.673128	0.880455	0.0552928	0.045855	FALSE
1164	YESphlox-KCl1	0.929432	-0.105579	0.951852	-0.0711906	1.00065	0.000930309	1.01777	0.0254104	9	0.277978	0.555956	0.25496	0.186009	FALSE
1164	YESphlox-LiCl4	0.989306	-0.0155111	1.01317	0.018877	0.996483	-0.0050832	1.01354	0.0193969	9	0.14236	0.600427	0.22154	0.0178076	FALSE
1164	YESphlox-LiCl6	0.982333	-0.0257164	1.00603	0.00867168	0.983175	-0.0244801	1	0	9	0.053749	0.230932	0.636516	0.022711	FALSE
1164	YESphlox-MMS0.005	1.0078	0.0112067	1.03211	0.0455948	1.01241	0.0177929	1.02973	0.042273	9	0.425322	0.702706	0.153227	0.0265092	FALSE
1164	YESphlox-MMS0.075	1.02167	0.0309284	1.04631	0.0653165	1.01249	0.0179146	1.02982	0.0423947	18	0.106392	0.224605	0.64858	0.0532245	FALSE
1164	YESphlox-NaCl150	0.991981	-0.0116151	1.01591	0.022773	0.989574	-0.0151203	1.00651	0.00935985	9	0.421872	0.877703	0.0566524	0.0271373	FALSE
1164	YESphlox-NaCl150MMS0.005	1.00821	0.0117989	1.03253	0.046187	1.01102	0.0158094	1.02832	0.0402895	9	0.393711	0.748633	0.125731	0.025962	FALSE
1164	YESphlox-Ovana0.5	0.993423	-0.00951988	1.01739	0.0248682	1.0048	0.00691157	1.022	0.0313917	9	0.398683	0.851661	0.0697333	0.0200619	FALSE
1164	YESphlox-Ovana1	0.99164	-0.012112	1.01556	0.0222762	1.00067	0.000969647	1.0178	0.0254498	9	0.108614	0.458592	0.338573	0.0103675	FALSE
1164	YESphlox-Ovana4	1.02479	0.0353256	1.04951	0.0697137	1.03916	0.0554151	1.05694	0.0798952	7	0.34193	0.855188	0.0679386	0.0645448	FALSE
1164	YESphlox-Phloxine2	0.988124	-0.0172357	1.01196	0.0171524	0.993022	-0.0101031	1.01002	0.014377	9	0.0765842	0.672101	0.172566	0.0155947	FALSE
1164	YESphlox-Phloxine2HP10	0.999696	-0.000438167	1.02381	0.03395	0.983175	-0.0244801	1	0	9	0.986223	0.9879	0.00528697	0.0512103	FALSE
1164	YESphlox-Phloxine2HP15	0.958766	-0.0607489	0.981894	-0.0263607	0.983175	-0.0244801	1	0	7	0.0710957	0.502114	0.299198	0.0508148	FALSE
1164	YESphlox-SDS0.004	0.986988	-0.0188962	1.0108	0.015492	0.997112	-0.00417276	1.01418	0.0203074	9	0.0505767	0.575487	0.239964	0.015235	FALSE
1164	YESphlox-TBH1	0.990604	-0.013619	1.0145	0.0207691	0.986643	-0.0194001	1.00353	0.00507997	9	0.32321	0.50474	0.296933	0.0254261	FALSE
1164	YESphlox-TBH1.5	0.968266	-0.0465252	0.991623	-0.0121371	0.955507	-0.065662	0.971858	-0.0411819	4	0.434734	0.6472	0.188961	0.0720952	FALSE
1164	YESphlox-TSA1000	0.987147	-0.0186637	1.01096	0.0157244	0.992972	-0.0101749	1.00996	0.0143052	9	0.0164914	0.193774	0.712705	0.0105049	FALSE
1164	YESphlox-TSA500	0.987287	-0.0184585	1.0111	0.0159296	0.998338	-0.00240019	1.01542	0.0220799	9	0.109161	0.539014	0.2684	0.0196726	FALSE
1164	YESphlox-TeaTree1	0.994128	-0.00849606	1.01811	0.0258921	0.999584	-0.000599897	1.01669	0.0238802	9	0.558846	0.789305	0.102755	0.0275537	FALSE
1164	YESphlox-TeaTree10	0.990479	-0.0138022	1.01437	0.0205859	0.99317	-0.00988696	1.01017	0.0145932	9	0.237422	0.775258	0.110554	0.0206028	FALSE
1164	YESphlox-TeaTree100	0.997641	-0.00340782	1.02171	0.0309803	1.00083	0.0011911	1.01795	0.0256712	9	0.74781	0.951799	0.0214546	0.0187943	FALSE
1164	YESphlox-Temp25	0.991991	-0.0116005	1.01592	0.0227876	1.00014	0.000209061	1.01726	0.0246892	9	0.439277	0.872367	0.0593009	0.0283346	FALSE
1164	YESphlox-Temp25Gluc0.1	0.986405	-0.0197473	1.0102	0.0146408	0.98483	-0.0220527	1.00168	0.00242741	18	0.120217	0.295316	0.529713	0.0328574	FALSE
1164	YESphlox-Temp25Gluc0.5	0.995929	-0.00588515	1.01995	0.028503	0.994834	-0.00747219	1.01186	0.0170079	18	0.609867	0.801337	0.0961845	0.030024	FALSE
1164	YESphlox-Temp25Gluc1	1.00094	0.00135027	1.02508	0.0357384	1.00785	0.0112854	1.0251	0.0357655	18	0.876307	0.929524	0.0317395	0.0200415	FALSE
1164	YESphlox-Temp25Gluc3	0.999524	-0.000686963	1.02363	0.0337012	0.994852	-0.00744642	1.01188	0.0170337	9	0.957145	0.994773	0.00227591	0.0239608	FALSE
1164	YESphlox-Tuni20	1.0093	0.0133547	1.03365	0.0477429	1.00707	0.0101648	1.0243	0.0346449	7	0.634233	0.922873	0.0348582	0.0494466	FALSE
1164	YESphlox-Tuni40	1.02383	0.0339795	1.04853	0.0683676	1.02813	0.0400192	1.04572	0.0644993	7	0.428019	0.763737	0.117056	0.0754811	FALSE
1164	YESphlox-Tuni60	0.961142	-0.057178	0.984327	-0.0227899	0.972895	-0.0396443	0.989544	-0.0151642	6	0.425729	0.897652	0.0468921	0.112202	FALSE
1164	YESphlox-Tuni80	1.02953	0.0419908	1.05437	0.0763789	1.03971	0.0561745	1.0575	0.0806546	8	0.178884	0.861345	0.0648229	0.0566613	FALSE
1164	YESphlox-VPA10	0.974479	-0.0372973	0.997986	-0.00290915	0.982562	-0.0253803	0.999376	-0.000900223	6	0.00428171	0.0428171	1.36838	0.0146329	FALSE
1164	YESphlox-VPA8	1.03061	0.0434959	1.05547	0.077884	1.04173	0.0589839	1.05956	0.083464	8	0.00223608	0.0299635	1.52341	0.0200107	FALSE
1164	YESphlox-Xylose2	0.99541	-0.00663743	1.01942	0.0277507	1.00762	0.0109528	1.02486	0.0354329	8	0.489745	0.790298	0.102209	0.0152319	FALSE
1164	Yesphlox-Caffeine10	0.996589	-0.00492899	1.02063	0.0294591	0.971018	-0.0424306	0.987635	-0.0179505	10	0.950655	0.985351	0.00640909	0.173202	FALSE
1164	Yesphlox-DMSO	0.978818	-0.030887	1.00243	0.00350108	0.983175	-0.0244801	1	0	12	0.000529392	0.0751737	1.12393	0.0144503	FALSE
1164	Yesphlox-Gal2	0.99081	-0.0133195	1.01471	0.0210686	0.987333	-0.0183909	1.00423	0.00608921	12	0.659583	0.836331	0.077622	0.0708815	FALSE
1164	Yesphlox-Rapa1	0.974153	-0.0377803	0.997652	-0.00339214	0.994134	-0.0084884	1.01115	0.0159917	11	0.292583	0.829294	0.0812912	0.0781922	FALSE
1164	Yesphlox-Rapa100	0.981023	-0.0276413	1.00469	0.00674679	0.988147	-0.0172021	1.00506	0.00727798	11	0.41543	0.718054	0.143843	0.0749473	FALSE
1164	Yesphlox-Sorb1.2	0.962127	-0.055701	0.985336	-0.0213129	0.975438	-0.0358779	0.992131	-0.0113977	11	0.186779	0.855829	0.0676129	0.0901047	FALSE
1164	Yesphlox-Torin5	1.01774	0.0253726	1.04229	0.0597607	0.980088	-0.0290164	0.996861	-0.00453626	12	0.769025	0.911505	0.040241	0.208721	FALSE
1165	EMM-3AT4	1.02237	0.0319159	1.0221	0.0315367	1.01367	0.0195929	1.01806	0.0258228	15	0.0106849	0.172485	0.763249	0.0278934	FALSE
1165	EMM-3AT6	0.994874	-0.00741439	0.994612	-0.0077936	0.995691	-0.00622987	1	0	15	0.496517	0.840982	0.0752131	0.0254743	FALSE
1165	EMM-Bleo200	0.99755	-0.00353947	0.997287	-0.00391867	0.984959	-0.0218651	0.989221	-0.0156352	15	0.733976	0.833551	0.0790679	0.0241982	FALSE
1165	EMM-Canav60	0.998476	-0.00220079	0.998213	-0.00257999	0.995691	-0.00622987	1	0	15	0.874857	0.98676	0.00578848	0.0345025	FALSE
1165	EMM-Cys	0.992654	-0.0106366	0.992394	-0.0110158	0.991086	-0.012918	0.995375	-0.00668811	28	0.254752	0.608147	0.215991	0.0284613	FALSE
1165	EMM-Met	1.01831	0.0261818	1.01805	0.0258026	1.00888	0.0127565	1.01325	0.0189863	30	0.0145667	0.553535	0.256855	0.0347847	FALSE
1165	EMMphlox-Act0.1	1.00422	0.00607233	0.99617	-0.00553611	0.996962	-0.00439027	0.996962	-0.00439027	20	0.690514	0.899568	0.0459659	0.038884	FALSE
1165	EMMphlox-Act1	1.00073	0.00105173	0.992709	-0.0105567	0.999765	-0.000339707	0.999765	-0.000339707	20	0.948738	0.997491	0.00109116	0.0428108	FALSE
1165	EMMphlox-Act2	1.02465	0.0351311	1.01644	0.0235227	1.00206	0.00296778	1.00206	0.00296778	20	0.0954159	0.691714	0.160074	0.0578063	FALSE
1165	EMMphlox-Cana75	1.00172	0.00248225	0.993694	-0.00912619	0.992919	-0.0102521	0.992919	-0.0102521	30	0.790692	0.887932	0.0516204	0.0154978	FALSE
1165	EMMphlox-EtOH0.1	0.999018	-0.00141789	0.991011	-0.0130263	0.996292	-0.00535929	0.996292	-0.00535929	20	0.9288	0.957635	0.0187999	0.0410185	FALSE
1165	YES-Bleo200	1.00078	0.00112038	1.00089	0.00129055	1.00527	0.00758182	1.00527	0.00758182	15	0.896183	0.953084	0.0208687	0.0220923	FALSE
1165	YES-Bleo300	1.01489	0.0213302	1.01501	0.0215003	1	0	1	0	5	0.332563	0.927189	0.0328319	0.0301759	FALSE
1165	YES-Bleo600	1.01172	0.0168094	1.01184	0.0169795	1.00264	0.00380803	1.00264	0.00380803	10	0.113719	0.50598	0.295867	0.0209102	FALSE
1165	YES-Bortezomib100	1.00216	0.0031114	1.00228	0.00328157	1.0011	0.00157939	1.0011	0.00157939	15	0.56489	0.825609	0.0832256	0.0133	FALSE
1165	YES-Bortezomib200	0.991644	-0.0121065	0.991761	-0.0119363	0.987989	-0.0174331	0.987989	-0.0174331	15	0.173644	0.403989	0.39363	0.0221045	FALSE
1165	YES-Bref60	0.959119	-0.0602176	0.959233	-0.0600474	0.956877	-0.0635942	0.956877	-0.0635942	15	0.0234791	0.116375	0.934142	0.0621816	FALSE
1165	YES-Calco10KCl0.5	1.00297	0.00428147	1.00309	0.00445165	1.00608	0.008751	1.00608	0.008751	15	0.704838	0.848801	0.0711942	0.0293603	FALSE
1165	YES-Calco2	1.01873	0.0267684	1.01885	0.0269386	1.021	0.029989	1.021	0.029989	14	0.00409222	0.0685361	1.16408	0.0200151	FALSE
1165	YES-Calco4KCl0.5	1.01353	0.0193892	1.01365	0.0195594	1.00417	0.00600972	1.00417	0.00600972	15	0.0348953	0.307303	0.512434	0.0220821	FALSE
1165	YES-Cana120	1.00973	0.0139649	1.00985	0.0141351	1.01217	0.0174513	1.01217	0.0174513	15	0.0414035	0.373089	0.428187	0.0162715	FALSE
1165	YES-Cana60	1.0151	0.0216238	1.01522	0.021794	1.012	0.0172105	1.012	0.0172105	14	0.0238154	0.394972	0.403434	0.0218049	FALSE
1165	YES-CoCl0.25	0.997948	-0.00296315	0.998066	-0.00279298	0.998865	-0.0016388	0.998865	-0.0016388	15	0.714131	0.946639	0.0238155	0.020673	FALSE
1165	YES-CoCl5	0.999392	-0.000877131	0.99951	-0.000706958	0.991529	-0.0122724	0.991529	-0.0122724	15	0.931735	0.956917	0.0191257	0.0265297	FALSE
1165	YES-Cycloh100	1.00195	0.00281704	1.00207	0.00298721	1.00009	0.000130115	1.00009	0.000130115	15	0.646649	0.972721	0.0120117	0.0153831	FALSE
1165	YES-Cycloh200	1.00677	0.00973906	1.00689	0.00990924	1.00528	0.00759836	1.00528	0.00759836	15	0.10287	0.495991	0.304526	0.0143588	FALSE
1165	YES-Cycloh400	1.00625	0.00899187	1.00637	0.00916204	1.00811	0.0116479	1.00811	0.0116479	14	0.392039	0.714012	0.146295	0.0260138	FALSE
1165	YES-Cycloh600	1.00032	0.000463299	1.00044	0.000633472	1	0	1	0	15	0.930115	0.993949	0.00263595	0.0130075	FALSE
1165	YES-Dhcumarin100	1.00698	0.0100287	1.00709	0.0101988	1.0072	0.0103551	1.0072	0.0103551	15	0.359647	0.696015	0.157381	0.0281195	FALSE
1165	YES-Dhcumarin200	0.99893	-0.00154439	0.999048	-0.00137422	0.995493	-0.00651693	0.995493	-0.00651693	13	0.865735	0.922372	0.035094	0.0218546	FALSE
1165	YES-Dhcumarin50	0.999369	-0.000910232	0.999487	-0.000740059	1	0	1	0	15	0.900277	0.959173	0.018103	0.0184854	FALSE
1165	YES-EDTA0.1	1.00807	0.0115894	1.00818	0.0117595	1.00822	0.0118167	1.00822	0.0118167	15	0.254759	0.764277	0.116749	0.0258803	FALSE
1165	YES-EDTA0.3	1.00429	0.00618127	1.00441	0.00635144	1.00262	0.00377887	1.00262	0.00377887	15	0.621648	0.885133	0.0529916	0.0325845	FALSE
1165	YES-EDTA0.6	1.00065	0.000935589	1.00077	0.00110576	1	0	1	0	15	0.90688	0.94848	0.0229717	0.0204988	FALSE
1165	YES-EtOH5	0.988369	-0.016879	0.988485	-0.0167088	0.986923	-0.0189905	0.986923	-0.0189905	15	0.0255013	0.281973	0.549792	0.017607	FALSE
1165	YES-Forma2	0.990366	-0.0139663	0.990483	-0.0137962	0.999522	-0.000690182	0.999522	-0.000690182	15	0.237492	0.660344	0.18023	0.0298724	FALSE
1165	YES-Forma3	0.995406	-0.00664265	0.995524	-0.00647248	1	0	1	0	15	0.510238	0.786043	0.104554	0.0258742	FALSE
1165	YES-HU30	1.00615	0.00884319	1.00627	0.00901336	1.00613	0.00882361	1.00613	0.00882361	14	0.295036	0.542486	0.265611	0.0205856	FALSE
1165	YES-HU45	1.00197	0.00283588	1.00209	0.00300605	0.999762	-0.000343415	0.999762	-0.000343415	15	0.808264	0.972933	0.0119169	0.0304147	FALSE
1165	YES-KCl0.5SDS0.01	1.00435	0.00625959	1.00447	0.00642976	1.00257	0.00370791	1.00257	0.00370791	15	0.43153	0.664789	0.177316	0.0202183	FALSE
1165	YES-KCl1SDS0.01	1.01264	0.0181251	1.01276	0.0182953	1.01642	0.0234946	1.01642	0.0234946	15	0.135048	0.427651	0.36891	0.0305451	FALSE
1165	YES-Ovana3	0.991692	-0.0120359	0.991809	-0.0118657	0.992384	-0.011029	0.992384	-0.011029	10	0.446342	0.683316	0.165378	0.0327737	FALSE
1165	YES-Ovana6	1.0206	0.0294115	1.02072	0.0295816	1.01987	0.028385	1.01987	0.028385	10	0.363051	0.669246	0.174414	0.0678838	FALSE
1165	YES-SDS0.01	1.00866	0.0124352	1.00878	0.0126053	1	0	1	0	19	0.316193	0.600767	0.221294	0.0361907	FALSE
1165	YES-SDS0.02	1.01235	0.0177096	1.01247	0.0178798	1.01161	0.0166583	1.01161	0.0166583	13	0.0999235	0.284782	0.545488	0.0246676	FALSE
1165	YES-TBH15	1.1148	0.156783	1.11493	0.156953	1.07939	0.110221	1.07939	0.110221	9	0.395574	0.789972	0.102388	0.383685	FALSE
1165	YES-UV1000	1.03484	0.0494035	1.03496	0.0495736	1	0	1	0	13	0.0398481	0.839481	0.0759889	0.0543928	FALSE
1165	YES-UV10m	1.01206	0.017295	1.01218	0.0174652	1.00858	0.0123299	1.00858	0.0123299	14	0.27247	0.648844	0.187859	0.0391202	FALSE
1165	YES-UV2000	1.01194	0.0171196	1.01206	0.0172897	1	0	1	0	15	0.162101	0.637223	0.195708	0.0309931	FALSE
1165	YES-UV20m	1.01279	0.0183326	1.01291	0.0185028	1.00662	0.00952397	1.00662	0.00952397	15	0.0129358	0.163854	0.785543	0.0170369	FALSE
1165	YES-UV3000	1.00315	0.00453906	1.00327	0.00470923	1.00598	0.00859585	1.00598	0.00859585	15	0.516079	0.926811	0.0330089	0.0176511	FALSE
1165	YES-UV4000	1.01547	0.0221483	1.01559	0.0223185	1.01398	0.0200243	1.01398	0.0200243	10	0.00435304	0.163965	0.78525	0.0130131	FALSE
1165	YES-UV5m	1.00215	0.00309968	1.00227	0.00326985	0.995134	-0.00703721	0.995134	-0.00703721	15	0.890249	0.949094	0.022691	0.0590776	FALSE
1165	YES-UV6000	1.00497	0.00715649	1.00509	0.00732666	1	0	1	0	15	0.265502	0.605345	0.217997	0.0159143	FALSE
1165	YES-UV9000	1.00135	0.00194942	1.00147	0.00211959	1.00024	0.000343468	1.00024	0.000343468	15	0.675631	0.895604	0.0478838	0.0112043	FALSE
1165	YES-VPA5	1.01052	0.0150997	1.01064	0.0152698	1.00799	0.0114766	1.00799	0.0114766	14	0.0091096	0.0944085	1.02499	0.0124653	FALSE
1165	YESphlox-Act0.1	1.03333	0.0472954	1.03366	0.0477662	1.0182	0.0260165	1.0182	0.0260165	20	0.0570789	0.63306	0.198555	0.0732189	FALSE
1165	YESphlox-Act1	0.988963	-0.0160115	0.989286	-0.0155407	0.987573	-0.01804	0.987573	-0.01804	20	0.250656	0.913949	0.0390778	0.0408713	FALSE
1165	YESphlox-Act2	1.00616	0.00885926	1.00649	0.00933003	0.999288	-0.0010279	0.999288	-0.0010279	20	0.450822	0.797303	0.0983765	0.0348145	FALSE
1165	YESphlox-stationary7	1.00287	0.00413687	1.0032	0.00460765	1.00054	0.000776198	1.00054	0.000776198	30	0.393717	0.880436	0.055302	0.014938	FALSE
1165	YESphlox-Benza12	0.99322	-0.00981412	0.993545	-0.00934335	0.998328	-0.00241455	0.998328	-0.00241455	15	0.0821277	0.438178	0.358349	0.0124335	FALSE
1165	YESphlox-Benza4	1.00894	0.0128391	1.00927	0.0133098	1	0	1	0	15	0.488022	0.741793	0.129717	0.0481049	FALSE
1165	YESphlox-Benza8	0.997213	-0.00402669	0.997538	-0.00355592	0.999898	-0.000147101	0.999898	-0.000147101	15	0.336139	0.653684	0.184632	0.00819257	FALSE
1165	YESphlox-Bort500	1.00731	0.0105112	1.00764	0.0109819	1.00924	0.0132664	1.00924	0.0132664	15	0.497159	0.699705	0.155085	0.0400152	FALSE
1165	YESphlox-CdCl1	1.02436	0.0347261	1.0247	0.0351969	1.03548	0.0503026	1.03548	0.0503026	8	0.225356	0.835165	0.0782275	0.0516648	FALSE
1165	YESphlox-Diamide2	1.0156	0.0223359	1.01593	0.0228067	1.0065	0.00934365	1.0065	0.00934365	15	0.0640324	0.608308	0.215876	0.0294262	FALSE
1165	YESphlox-Diamide3	0.999755	-0.000354173	1.00008	0.000116601	0.996597	-0.00491775	0.996597	-0.00491775	15	0.98055	0.98055	0.00853026	0.0376283	FALSE
1165	YESphlox-Diamide3.5	0.997856	-0.00309637	0.998182	-0.00262559	0.987402	-0.0182902	0.987402	-0.0182902	15	0.783438	0.913756	0.0391698	0.0287537	FALSE
1165	YESphlox-EDTA4	1.00504	0.0072594	1.00537	0.00773018	0.990273	-0.014102	0.990273	-0.014102	15	0.763669	0.937656	0.0279566	0.0633371	FALSE
1165	YESphlox-EGTA1	0.994976	-0.00726639	0.995301	-0.00679561	0.992471	-0.0109028	0.992471	-0.0109028	15	0.269724	0.914659	0.0387409	0.0154517	FALSE
1165	YESphlox-EGTA10	0.987859	-0.0176236	0.988181	-0.0171528	0.985244	-0.0214466	0.985244	-0.0214466	15	0.529493	0.745472	0.127569	0.0726054	FALSE
1165	YESphlox-EGTA15	0.915571	-0.127257	0.91587	-0.126786	0.914748	-0.128554	0.914748	-0.128554	7	0.0238564	0.578517	0.237684	0.0744075	FALSE
1165	YESphlox-EGTA5	0.998191	-0.00261199	0.998517	-0.00214122	1	0	1	0	15	0.654469	0.96353	0.0161349	0.0135195	FALSE
1165	YESphlox-EtOH0.1	0.999714	-0.000413124	1.00004	5.765e-05	0.99431	-0.00823176	0.99431	-0.00823176	19	0.977522	0.985275	0.00644254	0.0429184	FALSE
1165	YESphlox-EtOH10	0.999373	-0.000905554	0.999699	-0.00043478	1	0	1	0	15	0.949658	0.984191	0.00692074	0.0371222	FALSE
1165	YESphlox-Forma2.5	1.00325	0.00468478	1.00358	0.00515555	1.00069	0.000988047	1.00069	0.000988047	15	0.625047	0.884312	0.0533944	0.0241744	FALSE
1165	YESphlox-Gluc0.1stationary7	0.984859	-0.0220109	0.98518	-0.0215401	0.992155	-0.0113623	0.992155	-0.0113623	30	0.00416304	0.0235212	1.62854	0.0251497	FALSE
1165	YESphlox-Gluc0.5stationary7	0.996979	-0.00436449	0.997305	-0.00389372	0.99909	-0.00131326	0.99909	-0.00131326	60	0.299713	0.474115	0.324116	0.0167661	FALSE
1165	YESphlox-Gluc1stationary7	0.999224	-0.00112	0.99955	-0.000649228	0.999731	-0.000388476	0.999731	-0.000388476	26	0.864383	0.913783	0.039157	0.020789	FALSE
1165	YESphlox-Glycerol2	1.00752	0.0108127	1.00785	0.0112835	1.00282	0.00406546	1.00282	0.00406546	15	0.345347	0.787885	0.103537	0.0290165	FALSE
1165	YESphlox-Glycerol2MMS0.0075	1.01581	0.0226317	1.01614	0.0231025	1	0	1	0	15	0.0995544	0.302069	0.519893	0.0341342	FALSE
1165	YESphlox-Glycerol3	0.997963	-0.00294108	0.998289	-0.00247031	0.998856	-0.00165093	0.998856	-0.00165093	15	0.750617	0.930113	0.0314643	0.0232463	FALSE
1165	YESphlox-Glycerol3MMS0.005	1.00864	0.0124051	1.00896	0.0128759	1.00532	0.00765175	1.00532	0.00765175	15	0.127609	0.323277	0.490425	0.0195794	FALSE
1165	YESphlox-HP10	1.01918	0.0274091	1.01951	0.0278799	1.00747	0.0107307	1.00747	0.0107307	36	0.346244	0.714648	0.145908	0.120041	FALSE
1165	YESphlox-HP15	0.991043	-0.0129803	0.991367	-0.0125095	1.00562	0.0080917	1.00562	0.0080917	9	0.833697	0.940604	0.0265933	0.123793	FALSE
1165	YESphlox-HP2	0.989914	-0.0146256	0.990237	-0.0141548	1	0	1	0	30	0.209449	0.660927	0.179846	0.0418443	FALSE
1165	YESphlox-HP4	0.994385	-0.00812363	0.994709	-0.00765286	0.99958	-0.000605679	0.99958	-0.000605679	45	0.274697	0.547449	0.261656	0.0316125	FALSE
1165	YESphlox-HP6	0.99619	-0.00550676	0.996515	-0.00503599	1	0	1	0	45	0.622393	0.818332	0.0870704	0.0499277	FALSE
1165	YESphlox-HP8	1.00395	0.00568473	1.00428	0.0061555	0.999933	-9.71355e-05	0.999933	-9.71355e-05	42	0.668006	0.872086	0.0594407	0.0579413	FALSE
1165	YESphlox-HU8	0.998713	-0.00185788	0.999039	-0.00138711	1	0	1	0	15	0.878738	0.930764	0.0311603	0.031263	FALSE
1165	YESphlox-HU8MMS0.075	1.00647	0.00930569	1.0068	0.00977647	1.008	0.0114886	1.008	0.0114886	15	0.443953	0.925015	0.0338511	0.0310287	FALSE
1165	YESphlox-KCl0.5	0.997845	-0.00311184	0.998171	-0.00264107	1.00054	0.000776958	1.00054	0.000776958	15	0.664132	0.850686	0.0702308	0.0173857	FALSE
1165	YESphlox-KCl0.5SDS0.004	1.00337	0.00485696	1.0037	0.00532773	1.00169	0.0024316	1.00169	0.0024316	15	0.724453	0.897692	0.0468729	0.0356028	FALSE
1165	YESphlox-KCl1	0.962744	-0.0547765	0.963058	-0.0543058	1.00447	0.00643314	1.00447	0.00643314	15	0.174022	0.443135	0.353464	0.100559	FALSE
1165	YESphlox-LiCl4	0.999501	-0.000720412	0.999827	-0.000249638	0.999528	-0.000680847	0.999528	-0.000680847	15	0.892858	0.944443	0.0248244	0.0120841	FALSE
1165	YESphlox-LiCl6	0.995114	-0.00706604	0.995439	-0.00659526	1	0	1	0	15	0.579077	0.776645	0.109777	0.0325538	FALSE
1165	YESphlox-MMS0.005	1.00728	0.0104611	1.00761	0.0109319	1	0	1	0	15	0.0833491	0.263939	0.578497	0.0136698	FALSE
1165	YESphlox-MMS0.075	1.03731	0.052846	1.03765	0.0533168	1.00502	0.00721719	1.00502	0.00721719	30	0.0695792	0.16525	0.781857	0.108042	FALSE
1165	YESphlox-NaCl150	0.999604	-0.000571467	0.99993	-0.000100693	1.00023	0.000329129	1.00023	0.000329129	15	0.932938	0.949598	0.0224604	0.0163735	FALSE
1165	YESphlox-NaCl150MMS0.005	1.00713	0.0102522	1.00746	0.0107229	1.00563	0.0080996	1.00563	0.0080996	15	0.107198	0.482172	0.316798	0.0146487	FALSE
1165	YESphlox-Ovana0.5	1.00288	0.00414512	1.0032	0.0046159	1.00716	0.0102862	1.00716	0.0102862	15	0.562574	0.955001	0.019996	0.0173761	FALSE
1165	YESphlox-Ovana1	1.0097	0.0139319	1.01003	0.0144027	1.00142	0.00204945	1.00142	0.00204945	12	0.1515	0.514275	0.288804	0.0210582	FALSE
1165	YESphlox-Ovana4	0.999898	-0.000147678	1.00022	0.000323096	1	0	1	0	13	0.996393	0.996393	0.00156938	0.0796984	FALSE
1165	YESphlox-Phloxine2	1.00638	0.00917684	1.00671	0.00964761	1.00048	0.000690835	1.00048	0.000690835	15	0.107375	0.680041	0.167465	0.0127656	FALSE
1165	YESphlox-Phloxine2HP10	1.02187	0.031214	1.02221	0.0316848	1.0149	0.0213446	1.0149	0.0213446	15	0.216238	0.483355	0.315734	0.0650782	FALSE
1165	YESphlox-Phloxine2HP15	1.03597	0.0509858	1.03631	0.0514566	1.00601	0.00864473	1.00601	0.00864473	11	0.427779	0.755011	0.122047	0.144274	FALSE
1165	YESphlox-SDS0.004	1.00118	0.00169595	1.0015	0.00216672	1	0	1	0	15	0.834661	0.955529	0.019756	0.0201702	FALSE
1165	YESphlox-TBH1	0.992987	-0.010153	0.993311	-0.00968221	0.993233	-0.00979601	0.993233	-0.00979601	15	0.0648754	0.224115	0.649529	0.0119577	FALSE
1165	YESphlox-TBH1.5	0.993618	-0.00923609	0.993943	-0.00876532	0.983888	-0.0234342	0.983888	-0.0234342	9	0.832673	0.906144	0.0428028	0.0875657	FALSE
1165	YESphlox-TSA1000	1.00878	0.0126055	1.0091	0.0130762	1.00764	0.0109839	1.00764	0.0109839	15	0.0362055	0.340332	0.468097	0.0133646	FALSE
1165	YESphlox-TSA500	0.999065	-0.00134919	0.999391	-0.00087842	1	0	1	0	15	0.877557	0.954028	0.020439	0.0219152	FALSE
1165	YESphlox-TeaTree1	0.988397	-0.0168378	0.988719	-0.016367	0.992055	-0.0115078	0.992055	-0.0115078	15	0.0524599	0.385863	0.413566	0.0203144	FALSE
1165	YESphlox-TeaTree10	1.00863	0.0123926	1.00896	0.0128634	0.997898	-0.00303646	0.997898	-0.00303646	15	0.260961	0.775258	0.110554	0.0276905	FALSE
1165	YESphlox-TeaTree100	0.999984	-2.31385e-05	1.00031	0.000447635	1	0	1	0	15	0.996885	0.996885	0.00135484	0.0138452	FALSE
1165	YESphlox-Temp25	1.00701	0.010081	1.00734	0.0105518	1	0	1	0	15	0.320723	0.737788	0.132068	0.0254551	FALSE
1165	YESphlox-Temp25Gluc0.1	0.982082	-0.0260847	0.982402	-0.025614	0.977806	-0.0323806	0.977806	-0.0323806	29	0.0011157	0.010597	1.97482	0.0253123	FALSE
1165	YESphlox-Temp25Gluc0.5	0.990938	-0.0131327	0.991262	-0.0126619	0.994729	-0.00762499	0.994729	-0.00762499	30	0.0735583	0.248243	0.605124	0.0248554	FALSE
1165	YESphlox-Temp25Gluc1	0.990866	-0.0132383	0.991189	-0.0127675	0.988622	-0.0165092	0.988622	-0.0165092	30	0.0866869	0.241363	0.617328	0.0264257	FALSE
1165	YESphlox-Temp25Gluc3	1.00948	0.0136191	1.00981	0.0140898	1.00881	0.0126568	1.00881	0.0126568	15	0.0699071	0.579818	0.236709	0.017631	FALSE
1165	YESphlox-Tuni20	1.03249	0.0461304	1.03283	0.0466012	1.02616	0.0372567	1.02616	0.0372567	13	0.0106635	0.156517	0.805437	0.0386119	FALSE
1165	YESphlox-Tuni40	1.01812	0.0259085	1.01845	0.0263793	1.02329	0.0332115	1.02329	0.0332115	13	0.273158	0.763737	0.117056	0.0565595	FALSE
1165	YESphlox-Tuni60	1.10662	0.146164	1.10698	0.146634	1.05836	0.0818351	1.05836	0.0818351	3	0.272089	0.897652	0.0468921	0.123066	FALSE
1165	YESphlox-Tuni80	1.01898	0.027127	1.01931	0.0275978	1	0	1	0	9	0.305237	0.861345	0.0648229	0.0517648	FALSE
1165	YESphlox-VPA10	1.0139	0.0199179	1.01423	0.0203887	1.01394	0.0199699	1.01394	0.0199699	11	0.220548	0.514612	0.28852	0.0348598	FALSE
1165	YESphlox-VPA8	1.00545	0.00784698	1.00578	0.00831775	1.00567	0.00815549	1.00567	0.00815549	10	0.675908	0.921074	0.0357054	0.0395257	FALSE
1165	YESphlox-Xylose2	1.02738	0.0389704	1.02772	0.0394412	1.02489	0.0354629	1.02489	0.0354629	11	0.0902844	0.603312	0.219458	0.0482038	FALSE
1165	Yesphlox-Caffeine10	0.979607	-0.029725	0.979927	-0.0292543	0.996478	-0.00508944	0.996478	-0.00508944	19	0.452722	0.850496	0.0703277	0.115572	FALSE
1165	Yesphlox-DMSO	0.994212	-0.00837396	0.994537	-0.00790318	0.997983	-0.00291217	0.997983	-0.00291217	20	0.692935	0.997352	0.00115156	0.0640276	FALSE
1165	Yesphlox-Gal2	0.991787	-0.0118983	0.99211	-0.0114275	1.00191	0.00274583	1.00191	0.00274583	20	0.581877	0.76506	0.116305	0.0650524	FALSE
1165	Yesphlox-Rapa1	0.99868	-0.00190503	0.999006	-0.00143426	0.986004	-0.0203345	0.986004	-0.0203345	16	0.908458	0.962534	0.0165839	0.0445266	FALSE
1165	Yesphlox-Rapa100	1.00768	0.0110422	1.00801	0.011513	1.01301	0.0186504	1.01301	0.0186504	20	0.580184	0.807708	0.0927458	0.0605031	FALSE
1165	Yesphlox-Sorb1.2	0.994232	-0.00834522	0.994557	-0.00787445	0.999147	-0.00123146	0.999147	-0.00123146	16	0.590009	0.894193	0.0485689	0.0412545	FALSE
1165	Yesphlox-Torin5	0.987429	-0.0182511	0.987751	-0.0177804	0.990403	-0.0139131	0.990403	-0.0139131	20	0.615199	0.877184	0.0569092	0.109723	FALSE
1166	EMM-3AT4	0.935625	-0.0959978	0.947988	-0.077059	0.983215	-0.0244214	0.984941	-0.0218903	12	0.149319	0.632478	0.198955	0.132427	FALSE
1166	EMM-3AT6	0.982939	-0.024826	0.995928	-0.00588724	1.00249	0.00358241	1.00425	0.00611356	11	0.495063	0.840982	0.0752131	0.0493117	FALSE
1166	EMM-Bleo200	1.00381	0.00548563	1.01707	0.0244243	1.01262	0.0180912	1.0144	0.0206223	12	0.859463	0.898888	0.0462942	0.026843	FALSE
1166	EMM-Canav60	0.987646	-0.0179334	1.0007	0.00100529	1.00046	0.000662857	1.00222	0.003194	12	0.577208	0.924985	0.0338653	0.0324034	FALSE
1166	EMM-Cys	1.00185	0.0026705	1.01509	0.0216092	1.01299	0.0186199	1.01477	0.021151	24	0.930361	0.973038	0.0118701	0.0333912	FALSE
1166	EMM-Met	1.01437	0.0205854	1.02777	0.0395241	1.00491	0.00706055	1.00667	0.00959169	24	0.584454	0.855008	0.0680296	0.0836056	FALSE
1166	EMMphlox-Act0.1	0.993863	-0.00888104	1.00421	0.00605468	1.00447	0.00642803	1.01857	0.0265389	16	0.614701	0.898054	0.0466976	0.0455087	FALSE
1166	EMMphlox-Act1	1.00028	0.000397758	1.01069	0.0153335	1.00905	0.0130019	1.02322	0.0331128	16	0.974688	0.997491	0.00109116	0.0305	FALSE
1166	EMMphlox-Act2	0.982772	-0.0250711	0.992999	-0.0101354	0.974125	-0.0378212	0.987799	-0.0177103	16	0.181586	0.743492	0.128724	0.0473406	FALSE
1166	EMMphlox-Cana75	0.991219	-0.0127239	1.00153	0.00221182	0.990493	-0.0137813	1.0044	0.00632959	24	0.179496	0.431905	0.364612	0.0245432	FALSE
1166	EMMphlox-EtOH0.1	0.988052	-0.0173418	0.998334	-0.00240604	0.985108	-0.0216464	0.998936	-0.00153552	15	0.381124	0.855105	0.0679805	0.0494341	FALSE
1166	YES-Bleo200	1.01452	0.0208001	1.02494	0.0355386	1.01327	0.0190129	1.02373	0.0338284	12	0.093131	0.569948	0.244165	0.027112	FALSE
1166	YES-Bleo300	1.03458	0.0490463	1.0452	0.0637848	1.0257	0.0366129	1.03629	0.0514284	4	0.109225	0.927189	0.0328319	0.0310846	FALSE
1166	YES-Bleo600	1.00888	0.0127522	1.01924	0.0274907	1.01074	0.015411	1.02117	0.0302265	8	0.306194	0.630015	0.200649	0.0225174	FALSE
1166	YES-Bortezomib100	0.995424	-0.00661718	1.00565	0.00812133	0.994066	-0.00858645	1.00433	0.00622908	12	0.450334	0.754971	0.12207	0.0194764	FALSE
1166	YES-Bortezomib200	1.00329	0.00473677	1.01359	0.0194753	1.00406	0.00585266	1.01443	0.0206682	12	0.568388	0.723792	0.140386	0.0185116	FALSE
1166	YES-Bref60	1.07589	0.105526	1.08693	0.120265	1.03471	0.0492283	1.04539	0.0640438	11	0.225882	0.436449	0.360066	0.19694	FALSE
1166	YES-Calco10KCl0.5	0.998235	-0.0025483	1.00849	0.0121902	1.00521	0.0074978	1.01559	0.0223133	12	0.854052	0.923257	0.0346776	0.0321577	FALSE
1166	YES-Calco2	1.01384	0.0198365	1.02426	0.0345751	1.01066	0.0152921	1.02109	0.0301076	12	0.086829	0.412438	0.384642	0.0252073	FALSE
1166	YES-Calco4KCl0.5	0.992414	-0.0109864	1.0026	0.00375214	0.995777	-0.00610611	1.00606	0.00870942	12	0.256708	0.667319	0.175667	0.0213599	FALSE
1166	YES-Cana120	1.0172	0.0246058	1.02765	0.0393443	1.0165	0.0236136	1.02699	0.0384291	12	0.0523634	0.373089	0.428187	0.0272328	FALSE
1166	YES-Cana60	1.00728	0.0104696	1.01763	0.0252081	1.00446	0.00642383	1.01483	0.0212394	12	0.132601	0.473591	0.324596	0.0146075	FALSE
1166	YES-CoCl0.25	0.99659	-0.00492803	1.00682	0.00981049	0.995415	-0.00663025	1.00569	0.00818527	12	0.504772	0.919084	0.0366446	0.0161092	FALSE
1166	YES-CoCl5	0.990452	-0.0138414	1.00062	0.000897083	0.990917	-0.0131636	1.00115	0.00165196	12	0.0429611	0.174913	0.757177	0.0136957	FALSE
1166	YES-Cycloh100	0.999633	-0.000529722	1.0099	0.0142088	1.00044	0.000639809	1.01077	0.0154553	12	0.93926	0.982015	0.00788197	0.0151573	FALSE
1166	YES-Cycloh200	0.999453	-0.000789546	1.00972	0.013949	1.00043	0.000617851	1.01076	0.0154334	12	0.895752	0.972878	0.0119416	0.0127271	FALSE
1166	YES-Cycloh400	0.987416	-0.0182703	0.997555	-0.00353182	0.988451	-0.0167589	0.998654	-0.00194335	12	0.0435523	0.432047	0.364469	0.0186737	FALSE
1166	YES-Cycloh600	1.00443	0.00637141	1.01474	0.0211099	0.99943	-0.000822645	1.00975	0.0139929	12	0.457908	0.962292	0.016693	0.0191299	FALSE
1166	YES-Dhcumarin100	0.988369	-0.0168784	0.998518	-0.00213991	0.989783	-0.0148155	1	0	9	0.169824	0.509472	0.29288	0.0229047	FALSE
1166	YES-Dhcumarin200	0.99484	-0.00746415	1.00505	0.00727437	0.995022	-0.0071994	1.00529	0.00761613	12	0.581485	0.774335	0.111071	0.0311593	FALSE
1166	YES-Dhcumarin50	1.00669	0.00962613	1.01703	0.0243646	1.00435	0.00625612	1.01471	0.0210716	11	0.274997	0.591503	0.228043	0.0185589	FALSE
1166	YES-EDTA0.1	1.00309	0.00445142	1.01339	0.0191899	1.00107	0.00153628	1.0114	0.0163518	12	0.541755	0.782967	0.106256	0.0159576	FALSE
1166	YES-EDTA0.3	0.985523	-0.0210393	0.995642	-0.00630076	0.985041	-0.0217445	0.995209	-0.00692898	12	0.00875917	0.229742	0.638759	0.0155	FALSE
1166	YES-EDTA0.6	1.00999	0.0143453	1.02036	0.0290838	1.01221	0.0175142	1.02266	0.0323297	12	0.119193	0.678455	0.168479	0.0199236	FALSE
1166	YES-EtOH5	1.00225	0.0032429	1.01254	0.0179814	1.00109	0.001566	1.01142	0.0163815	12	0.780844	0.971301	0.0126463	0.0268631	FALSE
1166	YES-Forma2	0.996174	-0.00552996	1.0064	0.00920855	0.992251	-0.0112234	1.00249	0.00359215	12	0.721174	0.923751	0.034445	0.0359983	FALSE
1166	YES-Forma3	1.0078	0.0112163	1.01815	0.0259548	0.997317	-0.00387557	1.00761	0.01094	12	0.294955	0.623046	0.20548	0.0240834	FALSE
1166	YES-HU30	0.98776	-0.0177671	0.997903	-0.00302854	0.985472	-0.0211138	0.995644	-0.00629831	12	0.10198	0.352296	0.453093	0.0233749	FALSE
1166	YES-HU45	0.995366	-0.00670134	1.00559	0.00803718	0.995828	-0.00603132	1.00611	0.00878421	12	0.499312	0.869949	0.0605063	0.0223435	FALSE
1166	YES-KCl0.5SDS0.01	0.990496	-0.0137768	1.00067	0.000961728	0.985386	-0.0212391	0.995557	-0.00642353	12	0.216653	0.484275	0.314908	0.0246753	FALSE
1166	YES-KCl1SDS0.01	0.99883	-0.00168845	1.00909	0.0130501	0.998533	-0.00211821	1.00884	0.0126973	12	0.90352	0.97171	0.0124632	0.0323654	FALSE
1166	YES-Ovana3	0.968181	-0.0466513	0.978123	-0.0319127	0.979669	-0.0296335	0.989782	-0.014818	7	0.0300569	0.492329	0.307745	0.0301363	FALSE
1166	YES-Ovana6	1.0117	0.0167749	1.02208	0.0315134	1.00149	0.00214182	1.01182	0.0169573	8	0.501786	0.734758	0.133856	0.0469425	FALSE
1166	YES-SDS0.01	0.951824	-0.0712337	0.961597	-0.0564952	0.986141	-0.0201345	0.99632	-0.00531901	16	0.163927	0.533934	0.272513	0.13283	FALSE
1166	YES-SDS0.02	1.025	0.0356176	1.03552	0.0503561	1.0113	0.0162056	1.02174	0.0310211	11	0.20733	0.422064	0.374621	0.0618756	FALSE
1166	YES-TBH15	0.960814	-0.0576705	0.97068	-0.042932	0.896996	-0.156826	0.906255	-0.14201	7	0.39024	0.789972	0.102388	0.113046	FALSE
1166	YES-UV1000	1.03415	0.0484406	1.04477	0.0631791	0.995344	-0.00673292	1.00562	0.00808261	12	0.357474	0.854912	0.0680786	0.124273	FALSE
1166	YES-UV10m	0.968104	-0.0467662	0.978045	-0.0320277	0.981932	-0.0263049	0.992068	-0.0114894	12	0.372194	0.731553	0.135754	0.119834	FALSE
1166	YES-UV2000	0.997744	-0.00325895	1.00799	0.0114796	1.00665	0.00956288	1.01704	0.0243784	12	0.864815	0.948332	0.0230396	0.0448518	FALSE
1166	YES-UV20m	1.00002	3.20102e-05	1.01029	0.0147705	1.0027	0.00388692	1.01305	0.0187024	12	0.997942	0.997942	0.000894683	0.0287147	FALSE
1166	YES-UV3000	1.0022	0.00316457	1.01249	0.0179031	1.00518	0.00745886	1.01556	0.0222744	12	0.660337	0.990365	0.00420469	0.015765	FALSE
1166	YES-UV4000	1.00618	0.00888163	1.01651	0.0236201	1.00349	0.00502407	1.01385	0.0198396	8	0.704368	0.89431	0.0485119	0.044349	FALSE
1166	YES-UV5m	0.996774	-0.00466133	1.00701	0.0100772	0.998241	-0.00253991	1.00855	0.0122756	12	0.777573	0.945821	0.0241908	0.0384616	FALSE
1166	YES-UV6000	1.0143	0.0204789	1.02471	0.0352174	1.00599	0.00861111	1.01637	0.0234266	12	0.143365	0.509031	0.293256	0.0312399	FALSE
1166	YES-UV9000	1.00489	0.00703887	1.01521	0.0217774	0.997249	-0.00397487	1.00754	0.0108407	12	0.417585	0.743824	0.12853	0.0193392	FALSE
1166	YES-VPA5	1.0131	0.0187699	1.0235	0.0335084	0.999131	-0.00125429	1.00944	0.0135612	12	0.263245	0.524503	0.280252	0.0384033	FALSE
1166	YESphlox-Act0.1	1.01124	0.0161214	1.02155	0.0307628	1.01382	0.0198027	1.02235	0.0318867	15	0.0731923	0.685732	0.163846	0.0219755	FALSE
1166	YESphlox-Act1	1.00637	0.00915697	1.01663	0.0237984	1.0067	0.00964096	1.01517	0.0217249	16	0.367525	0.913949	0.0390778	0.0268949	FALSE
1166	YESphlox-Act2	0.992716	-0.0105463	1.00284	0.00409507	0.990741	-0.0134199	0.999074	-0.00133588	16	0.511786	0.816557	0.0880135	0.0432821	FALSE
1166	YESphlox-stationary7	0.998167	-0.00264702	1.00835	0.0119944	0.995308	-0.00678499	1.00368	0.00529899	24	0.66353	0.889891	0.0506631	0.0187924	FALSE
1166	YESphlox-Benza12	1.00278	0.00400299	1.01301	0.0186444	1.00783	0.0112497	1.01631	0.0233337	12	0.640164	0.960245	0.0176178	0.0193933	FALSE
1166	YESphlox-Benza4	1.00882	0.012668	1.01911	0.0273094	1.01174	0.0168376	1.02025	0.0289216	12	0.0761882	0.660841	0.179903	0.0150096	FALSE
1166	YESphlox-Benza8	1.00649	0.00932833	1.01675	0.0239697	1.00702	0.0100887	1.01549	0.0221727	12	0.13472	0.520182	0.283844	0.0130743	FALSE
1166	YESphlox-Bort500	0.998807	-0.00172158	1.009	0.0129198	0.999246	-0.00108879	1.00765	0.0109952	12	0.823559	0.902747	0.0444338	0.0173295	FALSE
1166	YESphlox-CdCl1	0.911692	-0.133382	0.920991	-0.118741	0.975443	-0.0358698	0.983648	-0.0237859	6	0.307756	0.835165	0.0782275	0.192463	FALSE
1166	YESphlox-Diamide2	1.00067	0.000961545	1.01087	0.0156029	1.01362	0.019523	1.02215	0.031607	12	0.956633	0.994664	0.00232372	0.0415355	FALSE
1166	YESphlox-Diamide3	1.00961	0.0137921	1.0199	0.0284335	1.01271	0.0182219	1.02123	0.0303059	12	0.552289	0.817675	0.0874193	0.0545335	FALSE
1166	YESphlox-Diamide3.5	0.954604	-0.0670252	0.964342	-0.0523838	0.977706	-0.0325271	0.98593	-0.0204431	12	0.0102581	0.0779615	1.10812	0.0513085	FALSE
1166	YESphlox-EDTA4	1.01509	0.0216133	1.02545	0.0362547	1.01072	0.0153864	1.01922	0.0274704	12	0.388938	0.761284	0.118453	0.0586232	FALSE
1166	YESphlox-EGTA1	1.01131	0.0162213	1.02162	0.0308627	1.0105	0.0150707	1.019	0.0271546	12	0.0673181	0.60489	0.218324	0.0189215	FALSE
1166	YESphlox-EGTA10	1.10669	0.146247	1.11798	0.160889	1.08127	0.112733	1.09037	0.124817	12	0.000472555	0.0179571	1.74576	0.0763296	TRUE
1166	YESphlox-EGTA15	1.00394	0.00567536	1.01418	0.0203168	0.998773	-0.00177148	1.00717	0.0103125	5	0.864785	0.969582	0.0134153	0.0489317	FALSE
1166	YESphlox-EGTA5	1.00111	0.00159964	1.01132	0.016241	1.00087	0.00125271	1.00929	0.0133367	12	0.860751	0.96353	0.0161349	0.0208252	FALSE
1166	YESphlox-EtOH0.1	1.00025	0.000355875	1.01045	0.0149973	1.00321	0.00462762	1.01165	0.0167116	16	0.974031	0.985275	0.00644254	0.0293408	FALSE
1166	YESphlox-EtOH10	0.997769	-0.00322253	1.00795	0.0114189	1.0112	0.0160695	1.01971	0.0281535	12	0.898109	0.956864	0.0191498	0.0593013	FALSE
1166	YESphlox-Forma2.5	1.01255	0.0179951	1.02288	0.0326365	1.01652	0.0236374	1.02507	0.0357214	12	0.0650208	0.355786	0.448812	0.0209168	FALSE
1166	YESphlox-Gluc0.1stationary7	0.998633	-0.00197371	1.00882	0.0126677	1.00402	0.00578132	1.01246	0.0178653	24	0.788653	0.894163	0.0485833	0.0234857	FALSE
1166	YESphlox-Gluc0.5stationary7	0.99516	-0.00699922	1.00531	0.00764218	0.999655	-0.000497231	1.00806	0.0115868	48	0.234381	0.395299	0.403074	0.025484	FALSE
1166	YESphlox-Gluc1stationary7	1.00426	0.00613425	1.0145	0.0207756	1.00647	0.00930673	1.01494	0.0213907	21	0.335129	0.620001	0.207607	0.0184365	FALSE
1166	YESphlox-Glycerol2	1.00692	0.00995127	1.01719	0.0245927	1.00637	0.00915425	1.01483	0.0212382	12	0.250415	0.700959	0.154307	0.0192154	FALSE
1166	YESphlox-Glycerol2MMS0.0075	1.00021	0.000302633	1.01041	0.014944	0.995468	-0.00655375	1.00384	0.00553024	12	0.985271	0.99127	0.00380796	0.0384392	FALSE
1166	YESphlox-Glycerol3	1.00753	0.0108177	1.0178	0.0254591	1.00952	0.0136679	1.01801	0.0257519	12	0.127805	0.560929	0.251092	0.0151515	FALSE
1166	YESphlox-Glycerol3MMS0.005	1.00518	0.00744912	1.01543	0.0220905	0.998406	-0.00230104	1.0068	0.00978295	12	0.425364	0.66095	0.179831	0.0211487	FALSE
1166	YESphlox-HP10	1.04716	0.0664878	1.05785	0.0811292	0.995203	-0.00693689	1.00357	0.00514709	28	0.30725	0.681711	0.1664	0.242094	FALSE
1166	YESphlox-HP15	1.0047	0.0067652	1.01495	0.0214066	0.991659	-0.012084	1	0	9	0.920662	0.956414	0.019354	0.138498	FALSE
1166	YESphlox-HP2	0.997813	-0.00315841	1.00799	0.011483	0.996177	-0.00552538	1.00456	0.00655861	21	0.75699	0.928698	0.0321257	0.0313059	FALSE
1166	YESphlox-HP4	1.01672	0.023924	1.02709	0.0385654	1.01133	0.0162585	1.01984	0.0283424	33	0.108691	0.342364	0.465512	0.0580304	FALSE
1166	YESphlox-HP6	1.02342	0.0333955	1.03386	0.0480369	1.00007	0.000107405	1.00849	0.0121914	33	0.279192	0.521648	0.282622	0.123069	FALSE
1166	YESphlox-HP8	1.05108	0.0718694	1.0618	0.0865108	1.00251	0.00361053	1.01094	0.0156945	33	0.188492	0.686092	0.163618	0.220381	FALSE
1166	YESphlox-HU8	1.01037	0.0148883	1.02068	0.0295297	1.00993	0.0142499	1.01842	0.0263339	12	0.0538769	0.27918	0.554115	0.0161773	FALSE
1166	YESphlox-HU8MMS0.075	1.02124	0.030319	1.03165	0.0449604	1.00583	0.0083896	1.01429	0.0204736	12	0.308918	0.838492	0.0765009	0.0694523	FALSE
1166	YESphlox-KCl0.5	0.986928	-0.0189837	0.996995	-0.0043423	0.98831	-0.0169651	0.996622	-0.00488115	12	0.0272375	0.207005	0.68402	0.0175001	FALSE
1166	YESphlox-KCl0.5SDS0.004	1.00551	0.0079244	1.01576	0.0225658	0.999984	-2.30348e-05	1.0084	0.0120609	12	0.621005	0.871685	0.0596405	0.0374534	FALSE
1166	YESphlox-KCl1	0.981504	-0.0269337	0.991516	-0.0122923	0.975845	-0.0352768	0.984053	-0.0231928	12	0.264904	0.539269	0.268195	0.0548324	FALSE
1166	YESphlox-LiCl4	0.996893	-0.00449007	1.00706	0.0101513	1.00616	0.00885595	1.01462	0.0209399	12	0.605083	0.916684	0.0377804	0.0196057	FALSE
1166	YESphlox-LiCl6	1.01132	0.0162418	1.02164	0.0308832	1.00982	0.0141039	1.01832	0.0261878	12	0.0535298	0.230932	0.636516	0.0177464	FALSE
1166	YESphlox-MMS0.005	0.993655	-0.0091824	1.00379	0.005459	0.991797	-0.0118832	1.00014	0.000200771	12	0.317752	0.56633	0.24693	0.0204865	FALSE
1166	YESphlox-MMS0.075	0.982545	-0.0254044	0.992567	-0.010763	0.988517	-0.0166623	0.996832	-0.00457829	24	0.0250338	0.0817282	1.08763	0.0352728	FALSE
1166	YESphlox-NaCl150	0.995	-0.00723161	1.00515	0.00740979	0.99153	-0.0122722	0.99987	-0.000188261	12	0.561902	0.877703	0.0566524	0.0286943	FALSE
1166	YESphlox-NaCl150MMS0.005	0.99971	-0.000418494	1.00991	0.0142229	1.00353	0.00509005	1.01198	0.017174	12	0.949738	0.989655	0.00451611	0.0146212	FALSE
1166	YESphlox-Ovana0.5	0.996819	-0.00459619	1.00699	0.0100452	0.993817	-0.00894814	1.00218	0.00313584	12	0.549303	0.955001	0.019996	0.0170874	FALSE
1166	YESphlox-Ovana1	1.00619	0.00889868	1.01645	0.0235401	1.01573	0.0225184	1.02427	0.0346024	12	0.470394	0.773129	0.111748	0.0284062	FALSE
1166	YESphlox-Ovana4	1.02198	0.0313679	1.03241	0.0460093	1.00725	0.0104176	1.01572	0.0225016	11	0.447055	0.855188	0.0679386	0.0928997	FALSE
1166	YESphlox-Phloxine2	0.993439	-0.00949738	1.00357	0.00514401	0.995763	-0.00612617	1.00414	0.00595782	12	0.205061	0.852309	0.0694031	0.0161886	FALSE
1166	YESphlox-Phloxine2HP10	1.02476	0.0352813	1.03521	0.0499227	1.03144	0.0446616	1.04012	0.0567456	12	0.0722646	0.316372	0.499802	0.0433279	FALSE
1166	YESphlox-Phloxine2HP15	1.10019	0.137753	1.11141	0.152394	1.06466	0.0903934	1.07362	0.102477	9	0.271056	0.586088	0.232037	0.256794	FALSE
1166	YESphlox-SDS0.004	0.996541	-0.00499914	1.00671	0.00964225	1.00645	0.00926863	1.01491	0.0213526	11	0.712508	0.955529	0.019756	0.0300713	FALSE
1166	YESphlox-TBH1	1.01443	0.0206627	1.02477	0.0353041	1.01666	0.023832	1.02521	0.035916	9	0.0920194	0.262527	0.580826	0.0225489	FALSE
1166	YESphlox-TBH1.5	1.0816	0.113163	1.09263	0.127805	1.02386	0.0340248	1.03248	0.0461088	6	0.323789	0.619665	0.207843	0.184513	FALSE
1166	YESphlox-TSA1000	0.988453	-0.0167558	0.998535	-0.00211438	0.992778	-0.0104562	1.00113	0.00162774	12	0.00226231	0.0797466	1.09829	0.00988824	FALSE
1166	YESphlox-TSA500	0.989252	-0.0155906	0.999342	-0.000949245	0.993273	-0.00973723	1.00163	0.00234675	12	0.114244	0.539014	0.2684	0.0213476	FALSE
1166	YESphlox-TeaTree1	1.01155	0.0165676	1.02187	0.031209	1.01375	0.0197077	1.02228	0.0317916	12	0.0812679	0.402315	0.395434	0.0205048	FALSE
1166	YESphlox-TeaTree10	1.00323	0.00465874	1.01347	0.0193001	1.00309	0.00444594	1.01152	0.0165299	12	0.488096	0.821934	0.0851628	0.0147169	FALSE
1166	YESphlox-TeaTree100	1.01009	0.0144898	1.0204	0.0291312	1.0069	0.00992378	1.01537	0.0220078	12	0.115789	0.646712	0.189289	0.0200719	FALSE
1166	YESphlox-Temp25	1.00253	0.00364999	1.01276	0.0182914	0.999517	-0.000696781	1.00792	0.0113872	12	0.702143	0.913227	0.0394213	0.0218322	FALSE
1166	YESphlox-Temp25Gluc0.1	0.994122	-0.00850529	1.00426	0.00613611	0.997767	-0.00322484	1.00616	0.00885914	21	0.335609	0.519504	0.284411	0.0264944	FALSE
1166	YESphlox-Temp25Gluc0.5	1.00665	0.00956435	1.01692	0.0242057	1.01191	0.0170791	1.02042	0.0291631	24	0.105507	0.313744	0.503425	0.0178399	FALSE
1166	YESphlox-Temp25Gluc1	0.99338	-0.00958309	1.00351	0.00505831	0.9931	-0.00998946	1.00145	0.00209452	24	0.387487	0.555789	0.25509	0.0362622	FALSE
1166	YESphlox-Temp25Gluc3	1.00281	0.00404174	1.01303	0.0186831	1.00267	0.00384326	1.0111	0.0159272	12	0.595801	0.96905	0.0136538	0.017032	FALSE
1166	YESphlox-Tuni20	0.970358	-0.0434111	0.980256	-0.0287697	1.01236	0.017717	1.02087	0.029801	6	0.619526	0.922873	0.0348582	0.138641	FALSE
1166	YESphlox-Tuni40	0.986675	-0.0193527	0.99674	-0.00471129	0.976241	-0.0346914	0.984452	-0.0226074	8	0.409293	0.763737	0.117056	0.0431709	FALSE
1166	YESphlox-Tuni60	1.00458	0.00659501	1.01483	0.0212364	0.999401	-0.0008641	1.00781	0.0112199	5	0.947188	0.977931	0.00969185	0.146788	FALSE
1166	YESphlox-Tuni80	1.01397	0.0200197	1.02432	0.0346611	1.02477	0.0352956	1.03339	0.0473796	8	0.667188	0.900146	0.0456871	0.0888598	FALSE
1166	YESphlox-VPA10	1.00157	0.0022564	1.01178	0.0168978	0.998526	-0.00212863	1.00692	0.00995535	8	0.895742	0.930905	0.0310945	0.032591	FALSE
1166	YESphlox-VPA8	1.0039	0.00561279	1.01414	0.0202542	0.997829	-0.003136	1.00622	0.00894798	11	0.664967	0.921074	0.0357054	0.0287546	FALSE
1166	YESphlox-Xylose2	0.989121	-0.0157815	0.99921	-0.00114008	0.987054	-0.0187998	0.995356	-0.00671583	9	0.287011	0.707131	0.1505	0.0285564	FALSE
1166	Yesphlox-Caffeine10	1.01342	0.0192336	1.02376	0.033875	1.00639	0.00918408	1.01485	0.0212681	15	0.53099	0.880229	0.0554041	0.0814838	FALSE
1166	Yesphlox-DMSO	1.01987	0.0283851	1.03027	0.0430265	1.01425	0.0204075	1.02278	0.0324915	16	0.113068	0.908621	0.0416172	0.0473144	FALSE
1166	Yesphlox-Gal2	1.01217	0.017445	1.02249	0.0320864	1.0028	0.00403532	1.01124	0.0161193	16	0.310362	0.648109	0.188352	0.0463624	FALSE
1166	Yesphlox-Rapa1	1.00353	0.0050799	1.01376	0.0197213	0.996527	-0.0050197	1.00491	0.00706428	13	0.840509	0.962534	0.0165839	0.0621786	FALSE
1166	Yesphlox-Rapa100	1.02205	0.0314676	1.03248	0.046109	1.01162	0.0166739	1.02013	0.0287579	16	0.25867	0.622563	0.205817	0.0756192	FALSE
1166	Yesphlox-Sorb1.2	1.00917	0.0131702	1.01946	0.0278116	1.01073	0.015402	1.01923	0.027486	13	0.376056	0.855829	0.0676129	0.035864	FALSE
1166	Yesphlox-Torin5	0.992165	-0.0113487	1.00228	0.00329273	0.982429	-0.0255749	0.990692	-0.0134909	16	0.778348	0.911505	0.040241	0.11027	FALSE
12	EMM-3AT4	0.977589	-0.0327002	1.01177	0.0168769	0.989889	-0.0146609	1.00522	0.00751469	12	0.248623	0.742295	0.129424	0.0291584	FALSE
12	EMM-3AT6	0.969507	-0.0446768	1.0034	0.00490031	0.981958	-0.0262661	0.997169	-0.00409053	12	0.112393	0.537029	0.270002	0.0263636	FALSE
12	EMM-Bleo200	0.97378	-0.0383327	1.00782	0.0112444	0.994333	-0.00819946	1.00973	0.0139761	12	0.145293	0.385196	0.414319	0.0115964	FALSE
12	EMM-Canav60	0.962398	-0.0552939	0.996045	-0.00571678	0.971636	-0.0415128	0.986686	-0.0193372	12	0.0614994	0.500781	0.300352	0.0330771	FALSE
12	EMM-Cys	0.966359	-0.0493695	1.00014	0.000207572	0.981957	-0.0262682	0.997167	-0.00409258	24	0.103569	0.500522	0.300577	0.0537151	FALSE
12	EMM-Met	1.01459	0.0208955	1.05006	0.0704726	0.984747	-0.0221756	1	0	24	0.724253	0.890538	0.0503474	0.188216	FALSE
12	EMMphlox-Act0.1	1.01076	0.0154367	1.01987	0.0283811	1.01715	0.024539	1.02172	0.0310036	16	0.0936308	0.60406	0.21892	0.0220082	FALSE
12	EMMphlox-Act1	1.00911	0.0130891	1.01821	0.0260335	1.00864	0.012414	1.01317	0.0188786	16	0.353984	0.769094	0.114021	0.0368961	FALSE
12	EMMphlox-Act2	0.99435	-0.00817505	1.00331	0.00476939	0.995529	-0.00646459	1	0	16	0.630283	0.93058	0.0312461	0.0450695	FALSE
12	EMMphlox-Cana75	0.999834	-0.000239455	1.00885	0.012705	0.997561	-0.00352263	1.00204	0.00294196	24	0.976872	0.981107	0.00828363	0.0242942	FALSE
12	EMMphlox-EtOH0.1	1.00946	0.0135886	1.01856	0.026533	1.00073	0.00104654	1.00522	0.00751113	16	0.367776	0.855105	0.0679805	0.0396699	FALSE
12	YES-Bleo200	1.00191	0.00275305	1.00032	0.000461558	0.998353	-0.00237738	0.998353	-0.00237738	12	0.809879	0.953084	0.0208687	0.0253371	FALSE
12	YES-Bleo300	0.999054	-0.00136508	0.997469	-0.00365658	0.999451	-0.000792446	0.999451	-0.000792446	4	0.931696	0.996216	0.0016465	0.0198015	FALSE
12	YES-Bleo600	1.02056	0.029356	1.01894	0.0270645	1.01811	0.0258901	1.01811	0.0258901	8	0.073419	0.50598	0.295867	0.0272257	FALSE
12	YES-Bortezomib100	1.00581	0.00835206	1.00421	0.00606056	1.00123	0.00176638	1.00123	0.00176638	12	0.352925	0.716014	0.145078	0.0189067	FALSE
12	YES-Bortezomib200	1.01081	0.0155118	1.00921	0.0132203	1.0027	0.00388698	1.0027	0.00388698	12	0.0922959	0.29227	0.534215	0.0188246	FALSE
[truncated: 16,719 more rows]

## Sheet: viability_stresses
RNA_gene	condition_short	mean_effect_size	mean_effect_size_log2	mean_fitness	mean_fitness_log2	median_effect_size	median_effect_size_log2	median_fitness	median_fitness_log2	observation_count	p_Welch	p_Welch_BH	p_Welch_BH_-log10	stdev_fitness	is_hit
1	EMMphlox-Act0.1	1.00332	0.00478863	1.00962	0.0138105	0.999021	-0.00141366	1.01261	0.0180828	16	0.688322	0.978714	0.00934405	0.0171997	FALSE
1	EMMphlox-Act1	1.00717	0.0103068	1.01349	0.0193287	0.988269	-0.017025	1.00171	0.00247149	12	0.60175	0.999668	0.000144008	0.0402694	FALSE
1	EMMphlox-Act2	0.995885	-0.00594899	1.00213	0.00307292	0.988421	-0.0168021	1.00187	0.00269442	13	0.653207	0.946743	0.0237681	0.0208879	FALSE
1	EMMphlox-Cana75	1.0122	0.0174903	1.01855	0.0265122	0.999159	-0.00121364	1.01275	0.0182828	4	0.266742	0.730038	0.136655	0.0152389	FALSE
1	EMMphlox-EtOH0.1	0.993412	-0.00953611	0.999644	-0.000514209	0.987161	-0.0186421	1.00059	0.000854401	16	0.550991	0.990702	0.00405709	0.0337606	FALSE
1	YESphlox-Act0.1	0.993136	-0.00993723	0.997482	-0.00363739	0.99603	-0.00573825	0.999745	-0.000367353	16	0.093786	0.350761	0.454988	0.0151439	FALSE
1	YESphlox-Act1	0.996906	-0.00447094	1.00127	0.0018289	0.998927	-0.00154862	1.00265	0.00382228	16	0.289306	0.547753	0.261415	0.0108844	FALSE
1	YESphlox-Act2	0.996877	-0.00451238	1.00124	0.00178746	0.995543	-0.00644484	0.999256	-0.00107394	13	0.283116	0.550718	0.259071	0.00968686	FALSE
1	YESphlox-Benza12	0.998625	-0.00198514	1.003	0.0043147	0.999892	-0.000156332	1.00362	0.00521457	4	0.442009	0.971455	0.0125775	0.00287923	FALSE
1	YESphlox-Benza4	1.00335	0.00483026	1.00774	0.0111301	1.00577	0.0082993	1.00952	0.0136702	12	0.140731	0.740428	0.130517	0.00692777	FALSE
1	YESphlox-Benza8	1.00086	0.00124131	1.00524	0.00754115	1.00199	0.00286798	1.00573	0.00823888	4	0.797953	0.983155	0.0073781	0.00603171	FALSE
1	YESphlox-Diamide2	0.990331	-0.0140167	0.994665	-0.00771684	0.990577	-0.0136595	0.994271	-0.00828858	9	0.0218752	0.207815	0.682323	0.010225	FALSE
1	YESphlox-Diamide3	0.993715	-0.0090954	0.998064	-0.00279556	0.990947	-0.0131195	0.994643	-0.00774863	9	0.176	0.618321	0.208786	0.0126026	FALSE
1	YESphlox-Diamide3.5	0.999302	-0.00100756	1.00368	0.00529228	0.998847	-0.00166469	1.00257	0.00370621	12	0.786438	0.926346	0.0332267	0.00830412	FALSE
1	YESphlox-EDTA4	1.0169	0.0241738	1.02135	0.0304736	1.01924	0.0274924	1.02304	0.0328633	12	0.00115622	0.0329522	1.48212	0.0135812	TRUE
1	YESphlox-EGTA10	0.983418	-0.0241228	0.987722	-0.0178229	0.996406	-0.0051945	1.00012	0.000176397	12	0.0691704	0.394271	0.404205	0.0285671	FALSE
1	YESphlox-EGTA15	1.00422	0.00607343	1.00861	0.0123733	1.00892	0.0128066	1.01268	0.0181775	8	0.438821	0.769799	0.113623	0.0144544	FALSE
1	YESphlox-EtOH0.1	0.99065	-0.0135531	0.994985	-0.00725325	0.993586	-0.00928362	0.997292	-0.00391272	12	0.0710215	0.296619	0.527801	0.0161297	FALSE
1	YESphlox-EtOH10	0.972534	-0.0401792	0.97679	-0.0338793	0.984578	-0.0224232	0.98825	-0.0170523	22	0.00400852	0.0286609	1.54271	0.0399523	TRUE
1	YESphlox-Forma2.5	1.0107	0.0153543	1.01512	0.0216541	1.01732	0.0247697	1.02111	0.0301406	12	0.0804157	0.298385	0.525223	0.0192039	FALSE
1	YESphlox-Glycerol2	1.00452	0.00650893	1.00892	0.0128088	1.00507	0.00730202	1.00882	0.0126729	12	0.00186064	0.106056	0.974463	0.00357717	FALSE
1	YESphlox-Glycerol2MMS0.0075	0.998295	-0.00246195	1.00266	0.00383789	1.00207	0.00298924	1.00581	0.00836014	12	0.618881	0.775302	0.110529	0.0112652	FALSE
1	YESphlox-Glycerol3	0.998268	-0.00250163	1.00264	0.00379821	1.00617	0.00886828	1.00992	0.0142392	12	0.769448	0.932037	0.0305668	0.0198751	FALSE
1	YESphlox-Glycerol3MMS0.005	0.993711	-0.00910124	0.99806	-0.0028014	0.993342	-0.00963785	0.997047	-0.00426695	8	0.196783	0.531951	0.274128	0.0123916	FALSE
1	YESphlox-HP10	0.997963	-0.00294129	1.00233	0.00335855	1.00021	0.00030059	1.00394	0.00567149	29	0.499582	0.709407	0.149104	0.0154979	FALSE
1	YESphlox-HP2	0.99676	-0.00468186	1.00112	0.00161798	0.996928	-0.0044386	1.00065	0.000932304	20	0.0843027	0.570047	0.244089	0.00724881	FALSE
1	YESphlox-HP4	0.997493	-0.00362157	1.00186	0.00267827	0.998057	-0.00280537	1.00178	0.00256553	38	0.0475205	0.355153	0.449584	0.0057862	FALSE
1	YESphlox-HP6	0.999068	-0.00134478	1.00344	0.00495506	0.999431	-0.000821612	1.00316	0.00454929	48	0.549459	0.803108	0.0952258	0.00911158	FALSE
1	YESphlox-HP8	0.997732	-0.0032755	1.0021	0.00302434	0.999542	-0.000661234	1.00327	0.00470967	30	0.281753	0.536312	0.270582	0.010485	FALSE
1	YESphlox-HU8	1.00086	0.00124362	1.00524	0.00754346	1.0025	0.00360812	1.00624	0.00897903	8	0.775686	0.893215	0.0490442	0.00797945	FALSE
1	YESphlox-HU8MMS0.075	0.99855	-0.00209369	1.00292	0.00420615	0.993376	-0.00958867	0.997081	-0.00421776	8	0.787498	0.95505	0.0199738	0.0145463	FALSE
1	YESphlox-KCl0.5	1.01723	0.0246482	1.02168	0.030948	1.02019	0.0288437	1.024	0.0342146	12	0.000240206	0.00391192	2.40761	0.0114346	TRUE
1	YESphlox-KCl0.5SDS0.004	0.992182	-0.0113229	0.996524	-0.00502306	0.995119	-0.00705893	0.998831	-0.00168802	12	0.0155758	0.14797	0.829826	0.00936418	FALSE
1	YESphlox-KCl1	1.00019	0.000276505	1.00457	0.00657634	0.997977	-0.00292092	1.0017	0.00244998	12	0.95449	0.98046	0.00857008	0.0110842	FALSE
1	YESphlox-LiCl4	0.988197	-0.0171294	0.992522	-0.0108295	0.990133	-0.0143062	0.993826	-0.00893526	12	0.0276856	0.242781	0.614785	0.0160861	FALSE
1	YESphlox-LiCl6	0.979166	-0.030374	0.983452	-0.0240742	0.982511	-0.025455	0.986175	-0.0200841	12	5.8479e-08	6.66661e-06	5.1761	0.00683404	TRUE
1	YESphlox-MMS0.005	0.998034	-0.00283919	1.0024	0.00346065	0.993257	-0.009761	0.996962	-0.0043901	21	0.553637	0.644026	0.191096	0.0145584	FALSE
1	YESphlox-MMS0.075	0.987569	-0.0180472	0.99189	-0.0117473	0.991615	-0.0121476	0.995314	-0.00677673	16	0.0628558	0.256693	0.590585	0.0247026	FALSE
1	YESphlox-NaCl150	1.00404	0.00582024	1.00844	0.0121201	1.00426	0.00613433	1.00801	0.0115052	12	0.0539813	0.487808	0.311751	0.00612795	FALSE
1	YESphlox-NaCl150MMS0.005	1.00191	0.00275285	1.00629	0.00905269	1.00163	0.00235187	1.00537	0.00772277	12	0.460638	0.625277	0.203927	0.00826579	FALSE
1	YESphlox-Ovana0.5	0.962409	-0.0552776	0.966621	-0.0489777	0.979052	-0.0305429	0.982703	-0.025172	12	0.011492	0.190802	0.719418	0.043172	FALSE
1	YESphlox-Ovana1	0.956603	-0.0640077	0.960789	-0.0577078	0.969243	-0.0450697	0.972858	-0.0396988	8	0.00192602	0.0771395	1.11272	0.0256942	FALSE
1	YESphlox-Phloxine2	0.996277	-0.00538174	1.00064	0.0009181	0.997132	-0.00414309	1.00085	0.00122781	12	0.0553466	0.394345	0.404124	0.00561089	FALSE
1	YESphlox-Phloxine2HP10	0.983583	-0.0238816	0.987887	-0.0175818	0.990423	-0.0138826	0.994118	-0.0085117	9	0.0263019	0.374803	0.426197	0.0181705	FALSE
1	YESphlox-SDS0.004	1.01649	0.0235987	1.02094	0.0298985	1.01317	0.0188806	1.01695	0.0242515	12	9.32177e-05	0.00531341	2.27463	0.00990177	FALSE
1	YESphlox-TBH1	1.00005	7.45407e-05	1.00443	0.00637438	1.0003	0.00043301	1.00403	0.00580391	4	0.984862	0.984862	0.00662468	0.00484196	FALSE
1	YESphlox-TBH1.5	1.00486	0.00699023	1.00925	0.0132901	0.994783	-0.00754632	0.998493	-0.00217541	8	0.702448	0.843668	0.0738283	0.0345957	FALSE
1	YESphlox-TSA1000	1.0103	0.0147888	1.01472	0.0210886	1.01437	0.0205811	1.01815	0.025952	9	0.0648748	0.417255	0.379599	0.0144297	FALSE
1	YESphlox-TSA500	1.00351	0.0050498	1.0079	0.0113496	1.00727	0.0104549	1.01103	0.0158258	12	0.430078	0.842235	0.0745665	0.014652	FALSE
1	YESphlox-TeaTree100	1.0126	0.0180624	1.01703	0.0243623	1.01405	0.020123	1.01783	0.0254939	9	0.00277521	0.105458	0.97692	0.00906544	FALSE
1	YESphlox-Temp25	1.02646	0.0376802	1.03095	0.0439801	1.02712	0.0386092	1.03095	0.0439801	2	0.00679105	0.0730038	1.13665	0.00207038	FALSE
1	YESphlox-Temp25Gluc0.1	1.00181	0.00261372	1.0062	0.00891356	1.01038	0.0148998	1.01415	0.0202707	24	0.579065	0.752118	0.123714	0.01535	FALSE
1	YESphlox-Temp25Gluc0.5	1.0062	0.00892114	1.01061	0.015221	1.0044	0.0063332	1.00815	0.0117041	24	0.0401208	0.151122	0.820673	0.0135598	FALSE
1	YESphlox-Temp25Gluc1	1.0129	0.0184904	1.01733	0.0247902	1.0103	0.0147821	1.01407	0.020153	16	0.000179355	0.00231531	2.63539	0.0105369	FALSE
1	YESphlox-Tuni20	1.01015	0.0145753	1.01457	0.0208751	1.0134	0.0191994	1.01718	0.0245703	4	0.372743	0.860591	0.0652033	0.0194917	FALSE
1	YESphlox-Tuni40	1.0072	0.0103436	1.0116	0.0166435	1.00784	0.0112726	1.0116	0.0166435	1					FALSE
1	YESphlox-VPA10	0.998273	-0.00249308	1.00264	0.00380676	0.999797	-0.000292437	1.00353	0.00507846	8	0.764817	0.890446	0.0503925	0.0156184	FALSE
1	YESphlox-VPA8	0.990297	-0.0140661	0.994631	-0.00776627	0.998048	-0.00281947	1.00177	0.00255144	12	0.178175	0.580717	0.236036	0.0233396	FALSE
1	YESphlox-Xylose2	0.993171	-0.00988534	0.997518	-0.0035855	1.01315	0.0188451	1.01693	0.024216	12	0.582657	0.738228	0.13181	0.0418772	FALSE
1	Yesphlox-Caffeine10	0.979889	-0.0293097	0.984177	-0.0230099	0.980185	-0.0288735	0.983841	-0.0235026	10	0.000128727	0.00605019	2.21823	0.0103866	TRUE
1	Yesphlox-DMSO	0.998059	-0.00280313	1.00243	0.0034967	0.997209	-0.0040316	1.00093	0.0013393	12	0.617726	0.843433	0.0739492	0.0128658	FALSE
1	Yesphlox-Gal2	0.997484	-0.00363378	1.00185	0.00266606	1.00063	0.000907293	1.00436	0.0062782	13	0.64873	0.87733	0.0568373	0.019289	FALSE
1	Yesphlox-Rapa1	0.993029	-0.0100919	0.997375	-0.00379206	0.9975	-0.00361149	1.00122	0.00175941	16	0.0918637	0.412544	0.38453	0.0152853	FALSE
1	Yesphlox-Rapa100	0.990157	-0.0142711	0.99449	-0.00797131	0.990137	-0.0143002	0.99383	-0.00892933	16	0.0124102	0.160205	0.795324	0.0137263	FALSE
[truncated: 9,308 more rows]

## Sheet: microscopy
significance_score_cell_size				significance_score_percentage_bi-nucleated
[truncated: 116 more rows]

## Sheet: Flow_cytometry
type	ncRNA	Cell_cycle	Average	SD	N	SEM
[truncated: 351 more rows]
