# Supplementary material for: Functional profiling of long intergenic non-coding RNAs in fission yeast
Source: eLife. 2022 Jan 5;11:e76000. doi: 10.7554/eLife.76000 (PMC8730722; doi:10.7554/eLife.76000)
Supplement: Supplementary file 4. [file elife-76000-supp4.xlsx]

## Sheet: Overview
Supplementary file 4: Phenotype data of coding-gene deletion mutants
Sheets included in this dataset
growth_benign	Differential fitness analysis in benign conditions based on colony sizes, comparing mutants to wild type in the same condition
viability_benign	Differential fitness analysis in benign conditions based on colony redness, comparing mutants to wild type in the same condition
growth_stresses	Differential fitness analysis in stress conditions based on colony sizes, comparing mutants in stressed versus unstressed conditions
viability_stresses	Differential fitness analysis in stress conditions based on colony redness, comparing mutants in stressed versus unstressed conditions
Explanation of column names
mean_effect_size	mean fitness divided by mean of control
mean_effect_size_log2	log2 of mean_effect_size
mean_fitness	mean of non-NA observations for this condition-strain pair (before normalising to control)
mean_fitness_log2	log2 of mean_fitness
median_effect_size	median fitness divided by median of control
median_effect_size_log2	log2 of median_effect_size
median_fitness	median of non-NA observations for this condition-strain pair (before normalising to control)
median_fitness_log2	log2 of median_fitness
observation_count	number of non-NA observations
p_Welch	p-value obtained by Welch's t-test, which does not assume homogeneity of variances
p_Welch_BH	p-value after FDR correction by the Benjamini-Hochberg method
p_Welch_BH_-log10	-log10 of p_Welch_BH
stdev_fitness	standard deviation of non-NA observations for this condition-strain pair (before normalising to control)

## Sheet: growth_benign
condition_short	strain_id	mean_effect_size	mean_effect_size_log2	mean_fitness	mean_fitness_log2	median_effect_size	median_effect_size_log2	median_fitness	median_fitness_log2	observation_count	p_Welch	p_Welch_BH	p_Welch_BH_-log10	stdev_fitness	is_hit
YES-Control	972	1	0	1.00389	0.00560403	1	0	1.00292	0.00420514	423	1	1	0	0.0267417	FALSE
YES-Control	SPAC105.02c	1.01827	0.026118	1.02223	0.0317221	1.02244	0.03202	1.02543	0.0362252	39	0.000271042	0.000690803	3.16065	0.0278068	FALSE
YES-Control	SPAC1071.07c	0.89706	-0.156724	0.900551	-0.15112	0.893064	-0.163165	0.895671	-0.158959	39	3.7526e-15	5.65754e-14	13.2474	0.0518393	TRUE
YES-Control	SPAC1071.09c	0.997597	-0.00347163	1.00148	0.00213241	1.00408	0.00586956	1.00701	0.0100747	39	0.691247	0.772001	0.112382	0.0367914	FALSE
YES-Control	SPAC10F6.14c	0.974676	-0.0370053	0.978469	-0.0314013	0.976293	-0.0346135	0.979143	-0.0304083	38	3.03672e-07	1.36939e-06	5.86347	0.024829	FALSE
YES-Control	SPAC11E3.12	1.04109	0.0580976	1.04514	0.0637016	1.04286	0.0605463	1.0459	0.0647514	39	1.97733e-05	6.47374e-05	4.18884	0.0525894	FALSE
YES-Control	SPAC12G12.11c	0.993732	-0.00907179	0.997599	-0.00346776	0.996414	-0.00518295	0.999322	-0.000977814	39	0.108136	0.152546	0.816598	0.0225925	FALSE
YES-Control	SPAC13A11.06	1.02891	0.0411131	1.03291	0.0467171	1.03127	0.0444199	1.03428	0.048625	39	4.80376e-10	3.02315e-09	8.51954	0.0219671	FALSE
YES-Control	SPAC13F5.03c	0.983311	-0.0242804	0.987138	-0.0186763	0.988282	-0.0170054	0.991167	-0.0128002	38	4.94291e-05	0.000149539	3.82525	0.021714	FALSE
YES-Control	SPAC13F5.04c	1.00147	0.00212009	1.00537	0.00772412	0.99798	-0.00291725	1.00089	0.00128789	39	0.674389	0.760279	0.119027	0.0202515	FALSE
YES-Control	SPAC140.01	1.02735	0.0389217	1.03134	0.0445258	1.02615	0.0372445	1.02915	0.0414496	38	3.33165e-05	0.000103106	3.98672	0.0354115	FALSE
YES-Control	SPAC1556.02c	1.00927	0.0133059	1.01319	0.0189099	1.00661	0.00950787	1.00955	0.013713	39	0.133845	0.179714	0.745418	0.0371168	FALSE
YES-Control	SPAC15A10.10	1.01035	0.01486	1.01429	0.020464	1.01064	0.0152703	1.01359	0.0194754	37	0.0498771	0.0784251	1.10554	0.0302731	FALSE
YES-Control	SPAC16.01	0.99615	-0.00556555	1.00003	3.84831e-05	0.993361	-0.0096105	0.99626	-0.00540536	38	0.394911	0.464944	0.332599	0.02655	FALSE
YES-Control	SPAC1610.02c	0.989647	-0.0150144	0.993498	-0.00941038	0.98386	-0.0234749	0.986732	-0.0192697	38	0.241675	0.297733	0.526172	0.0532849	FALSE
YES-Control	SPAC1687.14c	1.02222	0.0317102	1.0262	0.0373142	1.02286	0.0326054	1.02584	0.0368106	38	1.94832e-08	1.01228e-07	6.9947	0.0190726	FALSE
YES-Control	SPAC1687.15	1.02059	0.0294066	1.02456	0.0350107	1.02369	0.0337828	1.02668	0.0379879	39	0.000434459	0.00104885	2.97929	0.0328623	FALSE
YES-Control	SPAC16E8.01	0.894836	-0.160305	0.898319	-0.154701	0.896699	-0.157304	0.899316	-0.153099	39	5.4019e-21	1.61382e-19	18.7921	0.0364752	TRUE
YES-Control	SPAC1705.02	1.04672	0.0658755	1.05079	0.0714795	1.049	0.0690136	1.05206	0.0732188	38	3.75673e-11	2.99286e-10	9.52391	0.0316365	FALSE
YES-Control	SPAC17A2.02c	0.934078	-0.0983843	0.937714	-0.0927803	0.932438	-0.100921	0.935159	-0.0967157	38	1.33348e-13	1.59351e-12	11.7976	0.0366448	TRUE
YES-Control	SPAC17A5.16	0.978584	-0.0312321	0.982393	-0.0256281	0.983949	-0.0233439	0.986822	-0.0191388	39	0.00733096	0.0144802	1.83923	0.0468393	FALSE
YES-Control	SPAC17H9.04c	0.95816	-0.0616611	0.961889	-0.056057	0.958054	-0.0618205	0.960851	-0.0576154	39	1.4325e-09	8.55917e-09	8.06757	0.033187	FALSE
YES-Control	SPAC17H9.06c	1.00679	0.00975617	1.0107	0.0153602	1.00693	0.0099705	1.00987	0.0141756	39	0.00874344	0.0167175	1.77683	0.0135146	FALSE
YES-Control	SPAC1805.07c	0.892578	-0.163949	0.896052	-0.158345	0.893902	-0.161811	0.896512	-0.157606	39	6.20332e-22	3.70648e-20	19.431	0.0352713	TRUE
YES-Control	SPAC1834.04	1.02753	0.0391846	1.03153	0.0447886	1.02407	0.0343125	1.02706	0.0385177	39	3.29091e-06	1.26859e-05	4.89668	0.0313112	FALSE
YES-Control	SPAC1834.09	0.993985	-0.00870456	0.997853	-0.00310053	0.997089	-0.00420514	1	0	39	0.0950314	0.137652	0.861219	0.0206263	FALSE
YES-Control	SPAC186.06	0.98979	-0.0148058	0.993642	-0.00920177	0.992914	-0.0102597	0.995812	-0.00605452	39	0.00184745	0.00397783	2.40035	0.0178027	FALSE
YES-Control	SPAC18B11.04	1.00725	0.010418	1.01117	0.016022	1.00597	0.00858465	1.0089	0.0127898	39	0.0392574	0.0638267	1.195	0.0198863	FALSE
YES-Control	SPAC19B12.07c	0.999897	-0.000148699	1.00379	0.00545533	0.997089	-0.00420514	1	0	39	0.973963	0.990541	0.00412756	0.0179565	FALSE
YES-Control	SPAC19G12.15c	0.833408	-0.262905	0.836652	-0.257301	0.853427	-0.22866	0.855918	-0.224455	38	1.04953e-10	7.626e-10	9.1177	0.116184	TRUE
YES-Control	SPAC1A6.04c	0.974432	-0.0373659	0.978225	-0.0317619	0.973955	-0.0380724	0.976798	-0.0338673	38	2.17418e-05	7.022e-05	4.15354	0.0320968	FALSE
YES-Control	SPAC1B9.02c	1.00202	0.00291642	1.00592	0.00852046	1.00189	0.0027288	1.00482	0.00693394	38	0.479885	0.55676	0.254332	0.0156821	FALSE
YES-Control	SPAC1D4.03c	0.978291	-0.0316643	0.982099	-0.0260603	0.98051	-0.0283955	0.983372	-0.0241904	39	0.000271697	0.000690803	3.16065	0.0333119	FALSE
YES-Control	SPAC1F3.09	0.999995	-7.32676e-06	1.00389	0.00559671	1.00116	0.00167418	1.00408	0.00587932	38	0.999026	1	0	0.0243066	FALSE
YES-Control	SPAC1F8.06	0.974207	-0.0376992	0.977999	-0.0320952	0.976193	-0.034761	0.979043	-0.0305558	39	0.0107435	0.0199046	1.70105	0.0598318	FALSE
YES-Control	SPAC20G4.05c	1.02744	0.0390576	1.03144	0.0446616	1.0299	0.0424979	1.0329	0.0467031	39	4.3866e-08	2.18393e-07	6.66076	0.0250395	FALSE
YES-Control	SPAC20H4.03c	0.965668	-0.0504014	0.969426	-0.0447973	0.963393	-0.0538033	0.966205	-0.0495981	39	6.45597e-05	0.000188168	3.72545	0.0475845	FALSE
YES-Control	SPAC21E11.04	0.992285	-0.0111743	0.996146	-0.00557023	0.995835	-0.00602101	0.998742	-0.00181587	39	0.0590803	0.0905602	1.04306	0.0236546	FALSE
YES-Control	SPAC227.17c	0.988487	-0.0167057	0.992334	-0.0111016	0.98828	-0.0170078	0.991165	-0.0128027	38	0.17893	0.230424	0.637472	0.0514284	FALSE
YES-Control	SPAC22A12.06c	1.01795	0.0256607	1.02191	0.0312647	1.0155	0.0221939	1.01847	0.0263991	39	5.32594e-05	0.000157148	3.80369	0.023978	FALSE
YES-Control	SPAC22A12.14c	1.04457	0.0629116	1.04864	0.0685156	1.04172	0.0589661	1.04476	0.0631712	39	3.61903e-10	2.40264e-09	8.61931	0.0335083	FALSE
YES-Control	SPAC22E12.14c	0.930318	-0.104204	0.933939	-0.0985996	0.92715	-0.109125	0.929857	-0.10492	39	3.84953e-21	1.31434e-19	18.8813	0.0250296	TRUE
YES-Control	SPAC22F3.04	1.00496	0.00713253	1.00887	0.0127366	1.00205	0.00295786	1.00498	0.007163	39	0.262426	0.32164	0.49263	0.0261514	FALSE
YES-Control	SPAC23A1.06c	1.00925	0.013288	1.01318	0.0188921	1.00767	0.0110287	1.01062	0.0152338	39	0.0167876	0.0294579	1.5308	0.0219767	FALSE
YES-Control	SPAC23C11.08	0.989498	-0.0152318	0.993349	-0.00962779	0.995215	-0.00691915	0.998121	-0.00271401	38	0.0148537	0.0264928	1.57687	0.0243804	FALSE
YES-Control	SPAC23C4.09c	1.02106	0.0300727	1.02504	0.0356767	1.02245	0.0320248	1.02543	0.0362299	38	0.000334886	0.000842504	3.07443	0.0323709	FALSE
YES-Control	SPAC23D3.03c	1.00833	0.011968	1.01225	0.017572	0.997705	-0.00331434	1.00062	0.0008908	39	0.170625	0.221626	0.654378	0.0365677	FALSE
YES-Control	SPAC23D3.04c	0.986656	-0.019381	0.990496	-0.0137769	0.991608	-0.0121582	0.994503	-0.00795302	39	0.165137	0.216855	0.66383	0.0585947	FALSE
YES-Control	SPAC23G3.05c	0.986321	-0.0198709	0.99016	-0.0142669	0.988148	-0.0172009	0.991032	-0.0129958	39	0.0121951	0.022249	1.65269	0.0317523	FALSE
YES-Control	SPAC23H4.09	1.0316	0.044878	1.03561	0.050482	1.03361	0.0476918	1.03663	0.051897	39	1.05296e-10	7.626e-10	9.1177	0.0227437	FALSE
YES-Control	SPAC24H6.04	1.00768	0.0110386	1.0116	0.0166427	1.00672	0.00966614	1.00966	0.0138713	39	0.040426	0.0652825	1.1852	0.0213925	FALSE
YES-Control	SPAC25A8.03c	1.00045	0.000649974	1.00434	0.00625401	1.00513	0.00738762	1.00807	0.0115928	39	0.906555	0.946143	0.0240434	0.0225227	FALSE
YES-Control	SPAC25B8.08	1.0054	0.00776847	1.00931	0.0133725	1.00688	0.00989304	1.00982	0.0140982	39	0.209123	0.264147	0.578155	0.0253035	FALSE
YES-Control	SPAC26F1.10c	0.843845	-0.24495	0.847129	-0.239346	0.860148	-0.217343	0.862659	-0.213138	39	9.84367e-23	1.17632e-20	19.9295	0.0475968	TRUE
YES-Control	SPAC26F1.12c	0.986619	-0.0194353	0.990459	-0.0138312	0.992662	-0.0106257	0.995559	-0.00642058	39	0.000363512	0.000904993	3.04335	0.0204004	FALSE
YES-Control	SPAC27E2.03c	1.00046	0.000656292	1.00435	0.00626032	0.997089	-0.00420514	1	0	39	0.957904	0.982571	0.00763588	0.0530866	FALSE
YES-Control	SPAC29A4.20	0.997358	-0.00381677	1.00124	0.00178727	0.988994	-0.0159661	0.991881	-0.011761	39	0.781276	0.842101	0.0746356	0.0586917	FALSE
YES-Control	SPAC2F3.18c	1.00603	0.00867042	1.00994	0.0142745	1.00266	0.00383114	1.00559	0.00803628	39	0.109803	0.153467	0.813984	0.0217395	FALSE
YES-Control	SPAC32A11.03c	1.02808	0.0399549	1.03208	0.0455589	1.02933	0.0417073	1.03234	0.0459124	39	8.46967e-06	2.91386e-05	4.53553	0.0338158	FALSE
YES-Control	SPAC3A11.02	0.973347	-0.038974	0.977135	-0.03337	0.975375	-0.0359714	0.978222	-0.0317663	39	9.51576e-12	8.42321e-11	10.0745	0.0177103	FALSE
YES-Control	SPAC3A11.10c	1.0005	0.000717512	1.00439	0.00632154	0.997089	-0.00420514	1	0	39	0.91473	0.950523	0.0220372	0.0278012	FALSE
YES-Control	SPAC3A11.11c	1.0154	0.0220477	1.01935	0.0276518	1.01397	0.0200128	1.01693	0.0242179	39	5.9755e-06	2.13156e-05	4.6713	0.0175107	FALSE
YES-Control	SPAC3A12.03c	1.03037	0.0431589	1.03438	0.0487629	1.03071	0.0436357	1.03372	0.0478408	39	8.37712e-11	6.45849e-10	9.18987	0.0216865	FALSE
YES-Control	SPAC3A12.13c	1.01984	0.0283463	1.02381	0.0339504	1.01349	0.0193255	1.01644	0.0235306	39	0.00137246	0.00306558	2.51349	0.0353724	FALSE
YES-Control	SPAC3G6.03c	0.980458	-0.0284722	0.984274	-0.0228681	0.982829	-0.0249875	0.985698	-0.0207824	39	1.28856e-08	6.84366e-08	7.16471	0.0166392	FALSE
YES-Control	SPAC3G6.05	0.996742	-0.00470791	1.00062	0.00089612	0.997089	-0.00420514	1	0	39	0.331874	0.394617	0.403825	0.0192096	FALSE
YES-Control	SPAC3G9.11c	0.977171	-0.0333167	0.980974	-0.0277126	0.982986	-0.0247573	0.985855	-0.0205521	39	0.00266425	0.00563501	2.24911	0.0439776	FALSE
YES-Control	SPAC3H1.03	0.9986	-0.00202145	1.00249	0.00358259	1.00422	0.00607137	1.00715	0.0102765	39	0.874167	0.916342	0.0379426	0.0544702	FALSE
YES-Control	SPAC3H1.08c	0.972811	-0.0397683	0.976597	-0.0341643	0.982767	-0.0250793	0.985635	-0.0208742	39	0.00175045	0.00380326	2.41984	0.0501638	FALSE
YES-Control	SPAC3H1.11	0.99635	-0.00527612	1.00023	0.00032791	0.997089	-0.00420514	1	0	39	0.212031	0.265316	0.576236	0.0162207	FALSE
YES-Control	SPAC3H5.08c	0.928823	-0.106524	0.932438	-0.10092	0.934011	-0.0984888	0.936737	-0.0942836	39	1.51144e-16	4.0137e-15	14.3965	0.0330978	TRUE
YES-Control	SPAC3H5.09c	1.0033	0.00474896	1.0072	0.010353	1.00247	0.00355537	1.00539	0.00776051	39	0.226102	0.281449	0.5506	0.0148346	FALSE
YES-Control	SPAC3H5.10	0.892402	-0.164235	0.895875	-0.158631	0.898391	-0.154585	0.901013	-0.15038	39	1.53805e-12	1.53165e-11	10.8148	0.0658726	TRUE
YES-Control	SPAC3H8.03	0.974468	-0.0373135	0.97826	-0.0317095	0.977408	-0.0329673	0.980261	-0.0287622	39	2.5888e-07	1.18985e-06	5.92451	0.0252817	FALSE
YES-Control	SPAC3H8.04	0.999656	-0.00049593	1.00355	0.0051081	1.00053	0.000765168	1.00345	0.00497031	38	0.926748	0.958844	0.0182522	0.0215721	FALSE
YES-Control	SPAC4G9.11c	1.00475	0.00684086	1.00866	0.0124449	1.00719	0.010334	1.01013	0.0145392	39	0.0973531	0.140165	0.85336	0.0157232	FALSE
YES-Control	SPAC4G9.14	0.997119	-0.00416292	1.001	0.00144111	0.997089	-0.00420514	1	0	38	0.556281	0.639188	0.194371	0.0289799	FALSE
YES-Control	SPAC4H3.04c	1.05817	0.0815658	1.06228	0.0871698	1.05392	0.0757614	1.05699	0.0799665	39	3.77314e-15	5.65754e-14	13.2474	0.029908	TRUE
YES-Control	SPAC4H3.06	1.02677	0.0381107	1.03076	0.0437147	1.03085	0.0438375	1.03386	0.0480427	38	1.32055e-05	4.44524e-05	4.3521	0.0325637	FALSE
YES-Control	SPAC4H3.07c	0.888253	-0.170957	0.89171	-0.165353	0.89818	-0.154923	0.900802	-0.150718	39	3.16289e-15	5.65754e-14	13.2474	0.0558777	TRUE
YES-Control	SPAC521.03	1.00575	0.00826522	1.00966	0.0138693	1.00649	0.00933853	1.00943	0.0135437	39	0.052787	0.0824581	1.08377	0.0163148	FALSE
YES-Control	SPAC56F8.02	0.985774	-0.0206719	0.98961	-0.0150679	0.989326	-0.015482	0.992214	-0.0112768	39	0.0302889	0.0499244	1.30169	0.0389195	FALSE
YES-Control	SPAC57A7.09	1.01304	0.0186903	1.01698	0.0242943	1.014	0.0200586	1.01696	0.0242638	39	0.00356314	0.00740514	2.13047	0.0253442	FALSE
YES-Control	SPAC589.07c	1.00236	0.00339908	1.00626	0.00900311	1.00352	0.00506429	1.00645	0.00926943	39	0.637222	0.721783	0.141594	0.0300625	FALSE
YES-Control	SPAC5H10.06c	0.994964	-0.00728362	0.998836	-0.00167959	1.00216	0.00311733	1.00509	0.00732247	38	0.296223	0.357292	0.446977	0.0283621	FALSE
YES-Control	SPAC637.07	0.989597	-0.0150875	0.993448	-0.0094835	0.983956	-0.0233344	0.986828	-0.0191293	38	0.200432	0.254804	0.593793	0.04878	FALSE
YES-Control	SPAC652.01	0.985537	-0.0210183	0.989373	-0.0154143	0.984792	-0.0221098	0.987666	-0.0179046	39	0.0188436	0.0324002	1.48945	0.0362107	FALSE
YES-Control	SPAC683.02c	0.991411	-0.0124449	0.995269	-0.0068409	0.989052	-0.0158813	0.991939	-0.0116762	39	0.114365	0.156189	0.806349	0.0324091	FALSE
YES-Control	SPAC688.03c	1.02305	0.0328715	1.02703	0.0384756	1.02615	0.0372386	1.02914	0.0414437	37	1.35641e-06	5.68739e-06	5.24509	0.0239339	FALSE
YES-Control	SPAC688.13	0.987904	-0.0175567	0.991749	-0.0119527	0.988193	-0.0171356	0.991077	-0.0129305	38	1.40219e-05	4.65449e-05	4.33213	0.0137805	FALSE
YES-Control	SPAC694.02	0.9936	-0.00926318	0.997467	-0.00365915	0.997089	-0.00420514	1	0	38	0.347687	0.411372	0.385765	0.0409008	FALSE
YES-Control	SPAC694.04c	1.00866	0.01244	1.01259	0.018044	1.01073	0.0153968	1.01368	0.0196019	37	0.00826021	0.0159209	1.79803	0.0175553	FALSE
YES-Control	SPAC694.06c	0.939963	-0.0893245	0.943621	-0.0837205	0.946268	-0.079679	0.94903	-0.0754738	39	1.22228e-11	1.00733e-10	9.99683	0.0397778	TRUE
YES-Control	SPAC6F12.02	0.935285	-0.0965226	0.938925	-0.0909186	0.946159	-0.079845	0.948921	-0.0756399	38	8.16255e-05	0.000229512	3.6392	0.0902926	TRUE
YES-Control	SPAC6F6.13c	1.00628	0.00902642	1.01019	0.0146305	0.999224	-0.0011202	1.00214	0.00308494	38	0.0901835	0.133049	0.87599	0.0209862	FALSE
YES-Control	SPAC6G10.10c	1.00029	0.000425049	1.00419	0.00602908	1.00073	0.00105778	1.00365	0.00526292	39	0.94692	0.97549	0.010777	0.0263737	FALSE
YES-Control	SPAC7D4.05	1.01641	0.0234855	1.02037	0.0290895	1.01858	0.0265639	1.02156	0.0307691	39	2.06143e-06	8.35054e-06	5.07829	0.0176357	FALSE
YES-Control	SPAC806.04c	0.998852	-0.00165763	1.00274	0.00394641	0.999247	-0.00108688	1.00216	0.00311826	39	0.678629	0.761466	0.118349	0.0152685	FALSE
YES-Control	SPAC806.07	1.00889	0.0127745	1.01282	0.0183785	1.01393	0.0199566	1.01689	0.0241617	39	0.047573	0.0757997	1.12033	0.0261542	FALSE
YES-Control	SPAC821.05	0.982526	-0.0254322	0.98635	-0.0198281	0.971389	-0.0418792	0.974224	-0.037674	39	0.0591104	0.0905602	1.04306	0.0557852	FALSE
YES-Control	SPAC821.07c	1.08223	0.11401	1.08644	0.119614	1.07934	0.110145	1.08249	0.11435	39	7.74728e-16	1.68327e-14	13.7738	0.0397739	TRUE
YES-Control	SPAC823.09c	0.998159	-0.00265786	1.00204	0.00294617	0.994357	-0.00816489	0.997259	-0.00395975	39	0.735127	0.812426	0.0902161	0.0328991	FALSE
YES-Control	SPAC823.16c	1.03232	0.0458859	1.03633	0.0514899	1.02986	0.0424527	1.03287	0.0466578	39	5.54059e-09	3.07954e-08	7.51151	0.027048	FALSE
YES-Control	SPAC890.03	1.00802	0.0115312	1.01195	0.0171353	1.01234	0.0176951	1.0153	0.0219002	38	0.129776	0.175234	0.756381	0.0311222	FALSE
YES-Control	SPAC8C9.06c	0.535804	-0.900223	0.537889	-0.894619	0.57122	-0.807882	0.572887	-0.803677	36	1.16596e-15	2.32221e-14	13.6341	0.203804	TRUE
YES-Control	SPAC8C9.16c	0.982603	-0.0253193	0.986427	-0.0197153	0.981921	-0.0263209	0.984787	-0.0221158	39	2.29109e-06	9.12617e-06	5.03971	0.0189161	FALSE
YES-Control	SPAC8F11.03	1.00579	0.00833233	1.00971	0.0139364	1.00545	0.00783636	1.00838	0.0120415	38	0.108506	0.152546	0.816598	0.0204107	FALSE
YES-Control	SPAC977.15	1.00974	0.0139892	1.01367	0.0195932	1.00656	0.00943689	1.0095	0.013642	39	0.0100528	0.0187705	1.72652	0.0213311	FALSE
YES-Control	SPACUNK4.13c	1.02758	0.0392441	1.03157	0.0448481	1.03037	0.0431629	1.03338	0.047368	39	1.55987e-13	1.77528e-12	11.7507	0.0162424	FALSE
YES-Control	SPACUNK4.16c	0.971999	-0.0409731	0.975782	-0.0353691	0.97451	-0.0372518	0.977354	-0.0330466	39	7.4712e-08	3.57124e-07	6.44718	0.0261924	FALSE
YES-Control	SPACUNK4.17	1.01254	0.0179777	1.01648	0.0235817	1.01125	0.01614	1.0142	0.0203452	38	0.000385135	0.000948941	3.02276	0.0187884	FALSE
YES-Control	SPAP14E8.05c	1.00177	0.00255584	1.00567	0.00815987	0.998466	-0.00221516	1.00138	0.00198998	39	0.782203	0.842101	0.0746356	0.0391163	FALSE
YES-Control	SPAP27G11.12	0.995245	-0.00687616	0.999119	-0.00127212	0.997184	-0.0040689	1.00009	0.000136238	38	0.135642	0.181108	0.742062	0.0176908	FALSE
YES-Control	SPAP8A3.04c	1.02232	0.0318426	1.0263	0.0374466	1.01709	0.0244535	1.02006	0.0286587	38	4.536e-06	1.7208e-05	4.76427	0.0252428	FALSE
YES-Control	SPAPB1A11.02	1.01579	0.0226019	1.01974	0.0282059	1.02132	0.0304374	1.0243	0.0346425	39	0.0036474	0.00751491	2.12408	0.0311617	FALSE
YES-Control	SPAPB1E7.11c	1.05045	0.0710099	1.05454	0.0766139	1.05151	0.0724568	1.05458	0.076662	39	4.89239e-14	6.15411e-13	12.2108	0.0281193	TRUE
YES-Control	SPAPB24D3.08c	0.99041	-0.0139025	0.994264	-0.00829844	0.990203	-0.0142031	0.993094	-0.00999794	39	0.00433659	0.00870962	2.06	0.0184818	FALSE
YES-Control	SPAPB2B4.07	1.02567	0.0365697	1.02966	0.0421737	1.01655	0.0236785	1.01952	0.0278836	39	1.77551e-06	7.31631e-06	5.13571	0.0281293	FALSE
YES-Control	SPBC106.10	1.01275	0.0182811	1.01669	0.0238852	1.01293	0.0185377	1.01589	0.0227428	38	0.120317	0.163385	0.786788	0.049038	FALSE
YES-Control	SPBC1105.05	0.930326	-0.104192	0.933947	-0.0985876	0.920263	-0.119881	0.92295	-0.115676	39	2.37677e-13	2.46978e-12	11.6073	0.0403426	TRUE
YES-Control	SPBC1105.14	1.08826	0.12202	1.09249	0.127624	1.09054	0.125048	1.09373	0.129253	39	1.453e-10	1.02137e-09	8.99082	0.0638264	TRUE
YES-Control	SPBC119.03	1.01109	0.0159106	1.01502	0.0215146	1.01058	0.0151864	1.01353	0.0193915	39	0.000718091	0.00165023	2.78246	0.0176303	FALSE
YES-Control	SPBC119.16c	0.98357	-0.0238999	0.987398	-0.0182958	0.987579	-0.0180326	0.990461	-0.0138275	39	0.000154691	0.000415405	3.38153	0.0236943	FALSE
YES-Control	SPBC1198.07c	1.00013	0.000191834	1.00403	0.00579587	0.997089	-0.00420514	1	0	39	0.968686	0.989385	0.00463477	0.0195133	FALSE
YES-Control	SPBC1198.11c	0.855495	-0.225169	0.858825	-0.219564	0.856111	-0.224131	0.85861	-0.219926	39	9.17204e-24	2.19212e-21	20.6591	0.0417434	TRUE
YES-Control	SPBC1198.14c	1.01891	0.0270312	1.02288	0.0326353	1.01691	0.024198	1.01988	0.0284032	38	0.000548227	0.00131026	2.88264	0.0302576	FALSE
YES-Control	SPBC11B10.10c	0.814384	-0.296219	0.817554	-0.290614	0.826016	-0.275759	0.828427	-0.271554	39	2.32272e-22	1.85043e-20	19.7327	0.0573305	TRUE
YES-Control	SPBC14C8.15	0.987805	-0.0177019	0.991649	-0.0120979	0.99161	-0.0121551	0.994505	-0.00794994	39	0.00768524	0.0150555	1.8223	0.026182	FALSE
YES-Control	SPBC14C8.16c	0.998644	-0.00195748	1.00253	0.00364655	0.994353	-0.00816973	0.997256	-0.00396458	39	0.856418	0.901691	0.0449421	0.0459703	FALSE
YES-Control	SPBC14F5.10c	1.04246	0.0599895	1.04652	0.0655935	1.0438	0.0618436	1.04685	0.0660487	39	2.02247e-13	2.19713e-12	11.6581	0.0248512	FALSE
YES-Control	SPBC1539.02	0.991912	-0.0117155	0.995773	-0.00611149	0.994095	-0.00854404	0.996997	-0.0043389	39	0.0114045	0.0209667	1.67847	0.0175928	FALSE
YES-Control	SPBC15C4.06c	1.01091	0.0156501	1.01484	0.0212541	1.01025	0.014715	1.0132	0.0189202	38	0.00245688	0.0052428	2.28044	0.0195883	FALSE
YES-Control	SPBC15D4.05	0.991545	-0.0122496	0.995404	-0.00664555	0.992059	-0.0115019	0.994955	-0.00729681	38	0.044502	0.0713824	1.14641	0.0240196	FALSE
YES-Control	SPBC1604.16c	1.00616	0.00886536	1.01008	0.0144694	1.00833	0.0119637	1.01127	0.0161689	39	0.111425	0.153934	0.812667	0.0224088	FALSE
YES-Control	SPBC16A3.02c	1.02006	0.0286472	1.02403	0.0342512	1.02366	0.033732	1.02664	0.0379371	38	8.73664e-05	0.000242797	3.61476	0.0275481	FALSE
YES-Control	SPBC16A3.08c	0.90096	-0.150464	0.904467	-0.14486	0.905376	-0.143411	0.908019	-0.139206	38	4.48879e-12	4.12623e-11	10.3844	0.0615469	TRUE
YES-Control	SPBC16C6.01c	1.03222	0.0457498	1.03624	0.0513539	1.03318	0.0470899	1.03619	0.051295	32	1.0262e-07	4.80906e-07	6.31794	0.0266055	FALSE
YES-Control	SPBC16D10.08c	0.933933	-0.0986095	0.937568	-0.0930055	0.932635	-0.100615	0.935358	-0.0964099	38	3.2173e-14	4.27186e-13	12.3694	0.0351253	TRUE
YES-Control	SPBC16E9.13	1.0196	0.0280067	1.02357	0.0336107	1.02005	0.0286419	1.02303	0.032847	39	0.000699175	0.00164598	2.78358	0.0326359	FALSE
YES-Control	SPBC16E9.16c	1.01597	0.0228515	1.01992	0.0284555	1.0233	0.0332351	1.02629	0.0374402	38	3.08919e-05	9.71468e-05	4.01257	0.0200033	FALSE
YES-Control	SPBC16H5.13	1.02696	0.0383868	1.03096	0.0439909	1.02543	0.0362325	1.02843	0.0404376	39	3.08079e-05	9.71468e-05	4.01257	0.0352862	FALSE
YES-Control	SPBC16H5.14c	1.02299	0.032791	1.02697	0.0383951	1.02759	0.0392643	1.03059	0.0434695	39	7.90439e-05	0.000224899	3.64801	0.0320256	FALSE
YES-Control	SPBC1709.09	0.98556	-0.0209844	0.989396	-0.0153804	0.988526	-0.0166486	0.991412	-0.0124435	39	0.0168859	0.0294579	1.5308	0.0354667	FALSE
YES-Control	SPBC1778.07	1.00809	0.0116297	1.01202	0.0172337	1.00876	0.0125854	1.01171	0.0167905	39	0.0374777	0.0613505	1.21218	0.022289	FALSE
YES-Control	SPBC17G9.07	0.852242	-0.230665	0.855559	-0.225061	0.864576	-0.209935	0.8671	-0.20573	39	3.78748e-15	5.65754e-14	13.2474	0.0739656	TRUE
YES-Control	SPBC17G9.09	1.01171	0.0167968	1.01565	0.0224008	1.0116	0.0166358	1.01455	0.020841	39	0.00954351	0.0179598	1.7457	0.0258922	FALSE
YES-Control	SPBC1861.02	1.03175	0.0450982	1.03577	0.0507022	1.03069	0.0436058	1.0337	0.047811	39	5.23096e-05	0.000156275	3.80611	0.0432866	FALSE
YES-Control	SPBC18A7.01	1.00106	0.0015237	1.00495	0.00712773	1.00084	0.00121105	1.00376	0.00541619	39	0.758269	0.827518	0.0822227	0.0198133	FALSE
YES-Control	SPBC18E5.10	0.977188	-0.0332919	0.980991	-0.0276879	0.983626	-0.0238178	0.986498	-0.0196127	39	0.00041459	0.00101109	2.99521	0.0363855	FALSE
YES-Control	SPBC18H10.02	0.840332	-0.250968	0.843603	-0.245364	0.841681	-0.248654	0.844138	-0.244449	39	1.14621e-11	9.78369e-11	10.0095	0.104769	TRUE
YES-Control	SPBC18H10.04c	0.977084	-0.033445	0.980887	-0.027841	0.974298	-0.0375645	0.977142	-0.0333593	39	0.00408984	0.00828367	2.08178	0.0464821	FALSE
YES-Control	SPBC18H10.05	1.00963	0.0138217	1.01356	0.0194258	1.00713	0.0102514	1.01007	0.0144565	39	0.0553627	0.08592	1.06591	0.0295668	FALSE
YES-Control	SPBC19C7.01	0.991311	-0.0125902	0.995169	-0.0069862	0.99813	-0.00270003	1.00104	0.00150511	39	0.110445	0.153468	0.813983	0.0324201	FALSE
YES-Control	SPBC1D7.03	0.89518	-0.159751	0.898664	-0.154147	0.896688	-0.157321	0.899306	-0.153116	39	2.37281e-21	9.45169e-20	19.0245	0.0356354	TRUE
YES-Control	SPBC20F10.02c	0.993017	-0.0101094	0.996882	-0.00450541	0.992349	-0.0110804	0.995246	-0.00687526	38	0.148458	0.19603	0.707677	0.0282552	FALSE
YES-Control	SPBC20F10.03	0.998981	-0.00147129	1.00287	0.00413274	0.999972	-3.9883e-05	1.00289	0.00416526	39	0.739722	0.812426	0.0902161	0.0173326	FALSE
YES-Control	SPBC21.03c	0.975812	-0.0353252	0.97961	-0.0297212	0.979213	-0.0303058	0.982071	-0.0261006	38	3.14452e-06	1.23203e-05	4.90938	0.0268627	FALSE
YES-Control	SPBC215.05	0.970421	-0.0433168	0.974198	-0.0377127	0.972437	-0.0403232	0.975276	-0.036118	39	8.92364e-05	0.000245144	3.61058	0.0418793	FALSE
YES-Control	SPBC215.06c	0.993875	-0.00886296	0.997744	-0.00325893	0.997089	-0.00420514	1	0	38	0.0935321	0.136306	0.865485	0.0206587	FALSE
YES-Control	SPBC21C3.03	0.992454	-0.0109272	0.996317	-0.00532313	0.999164	-0.00120657	1.00208	0.00299857	39	0.297494	0.357292	0.446977	0.0440818	FALSE
YES-Control	SPBC21C3.08c	1.00519	0.0074747	1.00911	0.0130787	1.00551	0.00793326	1.00845	0.0121384	39	0.0930167	0.136306	0.865485	0.0172439	FALSE
YES-Control	SPBC21C3.14c	1.01846	0.0263939	1.02243	0.031998	1.01671	0.0239144	1.01968	0.0281195	39	0.000262215	0.000688674	3.16199	0.0280395	FALSE
YES-Control	SPBC21C3.18	1.022	0.0313928	1.02598	0.0369968	1.0227	0.0323789	1.02568	0.036584	39	5.03448e-06	1.88007e-05	4.72583	0.0254417	FALSE
YES-Control	SPBC25B2.04c	0.931131	-0.102944	0.934755	-0.0973397	0.925355	-0.111922	0.928056	-0.107716	39	1.86271e-12	1.78075e-11	10.7494	0.0426819	TRUE
YES-Control	SPBC25H2.14	1.02467	0.0351652	1.02866	0.0407692	1.02046	0.0292191	1.02344	0.0334242	38	0.000932711	0.00212303	2.67304	0.0419296	FALSE
YES-Control	SPBC28F2.03	0.988398	-0.0168357	0.992245	-0.0112317	0.99229	-0.0111666	0.995186	-0.00696141	39	0.0193655	0.0328252	1.48379	0.0288485	FALSE
YES-Control	SPBC2D10.03c	1.01533	0.0219557	1.01929	0.0275597	1.01139	0.0163334	1.01434	0.0205386	39	0.000702467	0.00164598	2.78358	0.0251952	FALSE
YES-Control	SPBC2D10.05	1.00092	0.00132314	1.00481	0.00692718	1.00003	5.0281e-05	1.00295	0.00425542	39	0.828721	0.888181	0.0514985	0.0251618	FALSE
YES-Control	SPBC2G2.06c	0.986262	-0.0199577	0.9901	-0.0143536	0.987589	-0.0180181	0.990471	-0.0138129	39	0.000124778	0.000338886	3.46995	0.0191417	FALSE
YES-Control	SPBC30D10.10c	0.994477	-0.00799055	0.998347	-0.00238652	0.987868	-0.0176095	0.990752	-0.0134044	38	0.502627	0.580328	0.236326	0.0498742	FALSE
YES-Control	SPBC30D10.13c	0.996587	-0.00493265	1.00047	0.000671378	0.998152	-0.00266794	1.00107	0.0015372	38	0.57005	0.651876	0.185835	0.0360061	FALSE
YES-Control	SPBC31E1.01c	1.01195	0.0171382	1.01589	0.0227422	1.01077	0.0154548	1.01372	0.0196599	37	0.027881	0.0462747	1.33466	0.0310083	FALSE
YES-Control	SPBC32F12.03c	1.01196	0.0171523	1.0159	0.0227564	1.01131	0.0162272	1.01426	0.0204324	38	0.0134422	0.0241556	1.61698	0.027581	FALSE
YES-Control	SPBC32H8.03	0.999886	-0.000164583	1.00378	0.00543945	0.995234	-0.00689184	0.998139	-0.0026867	39	0.983485	0.995987	0.0017462	0.0333741	FALSE
YES-Control	SPBC36.07	1.00304	0.00437281	1.00694	0.00997684	1.00371	0.00533718	1.00664	0.00954232	39	0.721515	0.802056	0.0957953	0.0523907	FALSE
YES-Control	SPBC365.12c	1.03102	0.0440712	1.03503	0.0496752	1.02728	0.0388283	1.03028	0.0430334	39	6.60797e-10	4.0495e-09	8.3926	0.0238673	FALSE
YES-Control	SPBC365.20c	0.992672	-0.010611	0.996535	-0.005007	0.99232	-0.011122	0.995217	-0.00691683	39	0.0224486	0.037519	1.42575	0.0177963	FALSE
YES-Control	SPBC3B8.02	0.998169	-0.00264419	1.00205	0.00295984	1.0076	0.0109263	1.01054	0.0151314	39	0.838708	0.893139	0.049081	0.0554387	FALSE
YES-Control	SPBC3B8.08	0.992454	-0.0109278	0.996317	-0.00532382	0.990177	-0.0142413	0.993068	-0.0100362	39	0.0193586	0.0328252	1.48379	0.0178791	FALSE
YES-Control	SPBC3E7.07c	1.00258	0.00371479	1.00648	0.00931883	0.998936	-0.00153575	1.00185	0.00266939	39	0.423538	0.496204	0.30434	0.0183259	FALSE
YES-Control	SPBC3H7.03c	0.962342	-0.0553781	0.966088	-0.0497741	0.964449	-0.0522232	0.967264	-0.048018	39	3.36496e-05	0.000103106	3.98672	0.0499013	FALSE
YES-Control	SPBC3H7.10	0.980594	-0.0282715	0.984411	-0.0226674	0.980046	-0.0290786	0.982907	-0.0248734	39	0.012753	0.0230906	1.63657	0.0459648	FALSE
YES-Control	SPBC409.07c	0.988977	-0.0159909	0.992826	-0.0103869	0.994135	-0.00848618	0.997037	-0.00428104	39	0.166426	0.217354	0.662833	0.0483566	FALSE
YES-Control	SPBC428.08c	1.01502	0.0215034	1.01897	0.0271074	1.02087	0.0297956	1.02385	0.0340008	39	0.000268406	0.000690803	3.16065	0.0225291	FALSE
YES-Control	SPBC428.15	1.00719	0.0103427	1.01111	0.0159467	1.00477	0.00685813	1.0077	0.0110633	38	0.0597739	0.0909933	1.04099	0.0216539	FALSE
YES-Control	SPBC4F6.08c	0.929277	-0.105819	0.932894	-0.100215	0.940247	-0.0888886	0.942991	-0.0846834	38	5.28521e-09	3.00753e-08	7.52179	0.0580029	TRUE
YES-Control	SPBC543.07	0.925614	-0.111518	0.929216	-0.105914	0.93842	-0.0916943	0.941159	-0.0874892	38	4.47752e-08	2.18393e-07	6.66076	0.0671645	TRUE
YES-Control	SPBC646.09c	0.998261	-0.00251132	1.00215	0.00309271	0.997169	-0.00408967	1.00008	0.000115472	39	0.841738	0.893139	0.049081	0.0536405	FALSE
YES-Control	SPBC646.13	0.990911	-0.0131724	0.994768	-0.00756841	0.993451	-0.0094787	0.996351	-0.00527356	38	0.00783094	0.0152162	1.81769	0.018681	FALSE
YES-Control	SPBC649.04	0.996342	-0.00528722	1.00022	0.000316809	0.995956	-0.00584671	0.998863	-0.00164157	39	0.209991	0.264147	0.578155	0.0161719	FALSE
YES-Control	SPBC660.10	0.954736	-0.0668266	0.958452	-0.0612225	0.954794	-0.0667384	0.957581	-0.0625333	39	1.06639e-08	5.79242e-08	7.23714	0.039022	FALSE
YES-Control	SPBC685.04c	0.988938	-0.0160484	0.992787	-0.0104443	0.989034	-0.0159075	0.991921	-0.0117024	37	0.000711526	0.00165023	2.78246	0.0170435	FALSE
YES-Control	SPBC691.03c	0.967558	-0.0475797	0.971324	-0.0419756	0.964442	-0.0522341	0.967257	-0.048029	39	4.80667e-10	3.02315e-09	8.51954	0.024671	FALSE
YES-Control	SPBC725.11c	0.939557	-0.0899467	0.943214	-0.0843426	0.940363	-0.0887099	0.943108	-0.0845047	38	2.58739e-16	6.18387e-15	14.2087	0.028084	TRUE
YES-Control	SPBC776.01	0.979497	-0.029887	0.983309	-0.024283	0.983093	-0.0246009	0.985962	-0.0203957	39	4.33353e-08	2.18393e-07	6.66076	0.0184699	FALSE
YES-Control	SPBC947.05c	1.02355	0.0335803	1.02753	0.0391843	1.02527	0.0360088	1.02827	0.0402139	38	3.46841e-07	1.50718e-06	5.82183	0.0231829	FALSE
YES-Control	SPBC947.09	1.02736	0.0389438	1.03136	0.0445478	1.03136	0.0445437	1.03437	0.0487488	39	3.21108e-07	1.4212e-06	5.84734	0.0274433	FALSE
YES-Control	SPBC9B6.03	1.02852	0.0405714	1.03252	0.0461754	1.03181	0.0451799	1.03482	0.0493851	37	5.14188e-06	1.89063e-05	4.72339	0.032206	FALSE
YES-Control	SPBP22H7.04	0.992955	-0.0101993	0.99682	-0.00459525	0.997089	-0.00420514	1	0	38	0.0620613	0.0938775	1.02744	0.0213664	FALSE
YES-Control	SPBP35G2.11c	0.994975	-0.00726771	0.998847	-0.00166367	0.994933	-0.00732917	0.997837	-0.00312403	39	0.184905	0.236323	0.626495	0.0219747	FALSE
YES-Control	SPBP8B7.27	1.00934	0.0134115	1.01327	0.0190155	1.00968	0.0138943	1.01262	0.0180995	39	0.0179659	0.0311148	1.50703	0.0224821	FALSE
YES-Control	SPBP8B7.31	1.02194	0.031311	1.02592	0.036915	1.02564	0.0365313	1.02864	0.0407365	39	5.85353e-06	2.11969e-05	4.67373	0.0256033	FALSE
YES-Control	SPBPB21E7.04c	1.01447	0.0207252	1.01842	0.0263292	1.01778	0.0254247	1.02075	0.0296298	39	0.00349413	0.00732541	2.13517	0.0282617	FALSE
YES-Control	SPBPJ4664.05	0.991924	-0.0116988	0.995784	-0.00609475	0.994272	-0.00828757	0.997174	-0.00408243	39	0.00158105	0.0034667	2.46008	0.0131038	FALSE
YES-Control	SPCC1020.08	1.00679	0.00976963	1.01071	0.0153737	1.00465	0.00669425	1.00758	0.0108994	39	0.0754385	0.112686	0.948129	0.0220022	FALSE
YES-Control	SPCC1235.03	0.99514	-0.00702857	0.999013	-0.00142454	0.997928	-0.00299305	1.00084	0.00121209	39	0.105773	0.151376	0.819944	0.0166704	FALSE
YES-Control	SPCC1259.02c	1.00554	0.0079698	1.00945	0.0135738	0.995599	-0.00636306	0.998505	-0.00215791	38	0.465441	0.542636	0.265492	0.045812	FALSE
YES-Control	SPCC126.12	0.98106	-0.0275868	0.984878	-0.0219828	0.986429	-0.0197129	0.989308	-0.0155077	38	1.20472e-06	5.14156e-06	5.28891	0.0196716	FALSE
YES-Control	SPCC1393.13	0.946048	-0.0800154	0.94973	-0.0744114	0.945753	-0.0804641	0.948514	-0.076259	39	3.46814e-09	2.02167e-08	7.69429	0.0443534	TRUE
YES-Control	SPCC13B11.01	1.00981	0.0140852	1.01374	0.0196892	1.0068	0.0097813	1.00974	0.0139864	39	0.2869	0.349842	0.456128	0.0563965	FALSE
YES-Control	SPCC1494.08c	0.925888	-0.111091	0.929491	-0.105487	0.926325	-0.11041	0.929029	-0.106205	39	1.32713e-14	1.86579e-13	12.7291	0.0391485	TRUE
YES-Control	SPCC162.12	0.995598	-0.00636435	0.999473	-0.000760316	0.999325	-0.000974476	1.00224	0.00323066	39	0.289822	0.351611	0.453937	0.0244624	FALSE
YES-Control	SPCC1620.03	1.00464	0.00667521	1.00855	0.0122792	1.00509	0.00732076	1.00802	0.0115259	39	0.179326	0.230424	0.637472	0.019755	FALSE
YES-Control	SPCC16A11.08	1.01606	0.0229822	1.02001	0.0285862	1.01654	0.0236715	1.01951	0.0278767	39	0.00555332	0.0110604	1.95623	0.0334881	FALSE
YES-Control	SPCC16C4.11	1.01787	0.0255485	1.02183	0.0311525	1.0083	0.011921	1.01124	0.0161262	39	0.022254	0.0374557	1.42648	0.0464075	FALSE
YES-Control	SPCC1753.02c	0.963421	-0.0537617	0.967171	-0.0481577	0.965513	-0.0506322	0.968332	-0.046427	39	7.73905e-06	2.72005e-05	4.56542	0.0440321	FALSE
YES-Control	SPCC188.02	1.01687	0.0241413	1.02083	0.0297453	1.01521	0.0217833	1.01818	0.0259884	39	0.114305	0.156189	0.806349	0.064994	FALSE
YES-Control	SPCC18B5.03	1.00461	0.00662868	1.00852	0.0122327	1.00402	0.00578423	1.00695	0.00998937	39	0.108049	0.152546	0.816598	0.0157278	FALSE
YES-Control	SPCC24B10.18	0.965297	-0.0509558	0.969054	-0.0453518	0.96744	-0.0477562	0.970264	-0.0435511	39	2.69792e-10	1.84229e-09	8.73464	0.0258335	FALSE
YES-Control	SPCC320.03	1.01246	0.0178718	1.01641	0.0234758	1.00854	0.0122667	1.01148	0.0164719	39	0.0088359	0.0167602	1.77572	0.0273665	FALSE
YES-Control	SPCC320.07c	1.02023	0.0288879	1.0242	0.0344919	1.01496	0.0214246	1.01792	0.0256298	39	0.000182472	0.000484565	3.31465	0.0299295	FALSE
YES-Control	SPCC338.04	0.982238	-0.0258557	0.986061	-0.0202517	0.977604	-0.0326778	0.980458	-0.0284727	39	0.00151563	0.00335403	2.47443	0.0318522	FALSE
YES-Control	SPCC4B3.03c	1.00246	0.0035517	1.00637	0.00915573	0.997876	-0.00306772	1.00079	0.00113742	39	0.626621	0.713155	0.146816	0.0304764	FALSE
YES-Control	SPCC4B3.12	1.00429	0.00616971	1.00819	0.0117737	0.999599	-0.000578125	1.00252	0.00362702	39	0.301536	0.360336	0.443292	0.0244038	FALSE
YES-Control	SPCC4G3.09c	1.02164	0.0308803	1.02561	0.0364843	1.02123	0.0303116	1.02421	0.0345168	39	0.00112157	0.00252883	2.59708	0.0378832	FALSE
YES-Control	SPCC4G3.12c	1.01015	0.0145675	1.01408	0.0201716	1.0109	0.0156338	1.01385	0.019839	39	0.142523	0.189238	0.722991	0.0417693	FALSE
YES-Control	SPCC4G3.17	1.01406	0.0201398	1.018	0.0257438	1.00941	0.0135069	1.01235	0.017712	38	0.00395839	0.00808595	2.09227	0.0274398	FALSE
YES-Control	SPCC553.01c	1.00299	0.00431077	1.0069	0.0099148	1.0065	0.0093414	1.00943	0.0135465	39	0.741041	0.812426	0.0902161	0.0557847	FALSE
YES-Control	SPCC5E4.10c	0.999945	-7.98046e-05	1.00384	0.00552423	0.998696	-0.00188194	1.00161	0.0023232	39	0.990284	0.99864	0.000590883	0.0271296	FALSE
YES-Control	SPCC613.03	1.01896	0.0270974	1.02293	0.0327015	1.01288	0.0184655	1.01584	0.0226706	39	7.87204e-05	0.000224899	3.64801	0.0261708	FALSE
YES-Control	SPCC622.11	0.993968	-0.00872827	0.997837	-0.00312424	0.999636	-0.000525807	1.00255	0.00367933	39	0.0855581	0.127009	0.896167	0.0199848	FALSE
YES-Control	SPCC63.03	1.00061	0.000882043	1.00451	0.00648608	1.00233	0.00336103	1.00526	0.00756617	39	0.844558	0.893139	0.049081	0.0176893	FALSE
YES-Control	SPCC63.06	0.878884	-0.186255	0.882305	-0.180651	0.868089	-0.204084	0.870623	-0.199879	39	1.26448e-21	6.04421e-20	19.2187	0.0400703	TRUE
YES-Control	SPCC663.06c	0.992785	-0.0104462	0.996649	-0.00484221	0.991333	-0.0125578	0.994227	-0.00835264	39	0.0695554	0.104552	0.980669	0.0229736	FALSE
YES-Control	SPCC736.13	0.990259	-0.0141223	0.994113	-0.00851829	0.987043	-0.018815	0.989924	-0.0146099	39	0.0166585	0.0294579	1.5308	0.0232332	FALSE
YES-Control	SPCC794.03	1.01251	0.0179323	1.01645	0.0235363	1.01442	0.0206496	1.01738	0.0248547	38	0.0486102	0.0769393	1.11385	0.0372129	FALSE
YES-Control	SPCC962.05	1.02097	0.0299404	1.02494	0.0355444	1.01963	0.0280507	1.02261	0.0322559	38	8.53433e-06	2.91386e-05	4.53553	0.0245813	FALSE
YES-Control	SPCC965.12	1.00163	0.00234505	1.00553	0.00794909	1.00031	0.00044994	1.00323	0.00465508	39	0.778276	0.842101	0.0746356	0.0350626	FALSE
YES-Control	SPCP31B10.02	1.00479	0.0069	1.0087	0.012504	1.00765	0.011	1.0106	0.0152051	39	0.239504	0.296588	0.527847	0.0238882	FALSE
YESphlox-Control	972	1	0	1.00504	0.00725452	1	0	1.00566	0.00814833	604	1	1	0	0.0296186	FALSE
YESphlox-Control	SPAC105.02c	1.02682	0.0381799	1.03199	0.0454344	1.01974	0.028199	1.02551	0.0363473	55	4.62271e-10	2.56937e-09	8.59017	0.0259653	FALSE
YESphlox-Control	SPAC1071.07c	0.891009	-0.166488	0.895501	-0.159233	0.918749	-0.122258	0.923952	-0.11411	55	6.60637e-13	6.07278e-12	11.2166	0.0868	TRUE
YESphlox-Control	SPAC1071.09c	1.00543	0.00781718	1.0105	0.0150717	0.999798	-0.000291999	1.00546	0.00785633	55	0.29924	0.354051	0.450934	0.0376284	FALSE
YESphlox-Control	SPAC10F6.14c	0.957149	-0.063184	0.961974	-0.0559295	0.961424	-0.0567552	0.96687	-0.0486068	54	5.05174e-11	3.35379e-10	9.47446	0.0384175	FALSE
YESphlox-Control	SPAC11E3.12	1.03869	0.0547705	1.04393	0.062025	1.03046	0.0432902	1.0363	0.0514386	55	2.54735e-11	1.79064e-10	9.74699	0.0343608	FALSE
YESphlox-Control	SPAC12G12.11c	0.989918	-0.0146187	0.994909	-0.00736418	0.996061	-0.00569405	1.0017	0.00245428	55	0.0325268	0.0508099	1.29405	0.033179	FALSE
YESphlox-Control	SPAC13A11.06	1.02402	0.0342496	1.02919	0.0415041	1.02508	0.0357384	1.03089	0.0438868	55	5.71473e-09	2.62658e-08	7.58061	0.0253552	FALSE
YESphlox-Control	SPAC13F5.03c	0.994787	-0.00754116	0.999801	-0.00028664	0.993148	-0.00991891	0.998773	-0.00177058	55	0.242329	0.295493	0.529453	0.0316871	FALSE
YESphlox-Control	SPAC13F5.04c	0.991095	-0.0129046	0.996091	-0.00565013	0.99389	-0.0088414	0.99952	-0.000693065	55	0.104743	0.141432	0.849451	0.0392879	FALSE
YESphlox-Control	SPAC140.01	1.01198	0.0171809	1.01708	0.0244354	1.00993	0.0142502	1.01565	0.0223985	55	0.0968831	0.133075	0.875903	0.0521436	FALSE
YESphlox-Control	SPAC1556.02c	0.982233	-0.0258627	0.987185	-0.0186081	0.988421	-0.0168029	0.994019	-0.00865456	55	0.010887	0.0201705	1.69528	0.0495208	FALSE
YESphlox-Control	SPAC15A10.10	0.987176	-0.0186206	0.992153	-0.0113661	0.989813	-0.0147723	0.995419	-0.00662394	55	0.00201513	0.00422469	2.3742	0.0283318	FALSE
YESphlox-Control	SPAC16.01	0.989789	-0.0148065	0.994779	-0.00755194	0.989197	-0.0156705	0.9948	-0.00752218	55	0.077124	0.110375	0.957129	0.0413498	FALSE
YESphlox-Control	SPAC1610.02c	0.96854	-0.0461169	0.973422	-0.0388624	0.972732	-0.039886	0.978241	-0.0317376	55	0.001078	0.00240788	2.61837	0.0674061	FALSE
YESphlox-Control	SPAC1687.14c	1.00968	0.0138972	1.01477	0.0211517	1.00992	0.0142471	1.01564	0.0223954	55	0.00242634	0.00504257	2.29735	0.0211738	FALSE
YESphlox-Control	SPAC1687.15	1.01425	0.0204168	1.01937	0.0276713	1.00756	0.0108705	1.01327	0.0190188	55	0.0054295	0.01055	1.97675	0.0357425	FALSE
YESphlox-Control	SPAC16E8.01	0.87729	-0.188874	0.881713	-0.181619	0.879397	-0.185413	0.884378	-0.177265	55	2.38343e-21	8.13771e-20	19.0895	0.0602867	TRUE
YESphlox-Control	SPAC1705.02	1.04674	0.0658991	1.05201	0.0731536	1.04238	0.0598792	1.04828	0.0680275	55	3.28258e-16	4.35853e-15	14.3607	0.0306371	FALSE
YESphlox-Control	SPAC17A2.02c	0.945047	-0.0815424	0.949811	-0.0742879	0.939311	-0.0903258	0.944631	-0.0821775	51	1.03877e-13	1.18222e-12	11.9273	0.0391871	TRUE
YESphlox-Control	SPAC17A5.16	0.963193	-0.0541029	0.968049	-0.0468483	0.985108	-0.0216461	0.990688	-0.0134978	55	0.00040292	0.000982631	3.00761	0.0723117	FALSE
YESphlox-Control	SPAC17H9.04c	0.963056	-0.0543084	0.967911	-0.0470539	0.960748	-0.0577702	0.96619	-0.0496218	55	7.5774e-10	4.02444e-09	8.39529	0.0366938	FALSE
YESphlox-Control	SPAC17H9.06c	1.00553	0.0079575	1.0106	0.015212	1.00615	0.00883903	1.01184	0.0169874	55	0.152666	0.1983	0.702678	0.0270566	FALSE
YESphlox-Control	SPAC1805.07c	0.870076	-0.200787	0.874462	-0.193533	0.894576	-0.160724	0.899643	-0.152575	55	2.87528e-13	2.8633e-12	11.5431	0.100976	TRUE
YESphlox-Control	SPAC1834.04	1.02636	0.0375379	1.03153	0.0447924	1.02663	0.0379145	1.03244	0.0460628	54	2.13379e-06	6.78631e-06	5.16837	0.0360106	FALSE
YESphlox-Control	SPAC1834.09	1.00901	0.0129358	1.01409	0.0201903	1.01018	0.0146115	1.0159	0.0227599	53	0.021765	0.0366326	1.43613	0.026609	FALSE
YESphlox-Control	SPAC186.06	0.999876	-0.000178627	1.00492	0.00707589	0.996111	-0.00562102	1.00175	0.00252732	55	0.974973	0.987366	0.00552166	0.0279064	FALSE
YESphlox-Control	SPAC18B11.04	1.00395	0.00568075	1.00901	0.0129353	1.00361	0.00520499	1.0093	0.0133533	55	0.234194	0.287607	0.541201	0.0228238	FALSE
YESphlox-Control	SPAC19B12.07c	1.0032	0.0046024	1.00825	0.0118569	1.00045	0.000653955	1.00612	0.00880229	55	0.426527	0.487751	0.311802	0.0283904	FALSE
YESphlox-Control	SPAC19G12.15c	0.742076	-0.430361	0.745817	-0.423107	0.755965	-0.403609	0.760246	-0.395461	54	6.47452e-22	3.09482e-20	19.5094	0.119624	TRUE
YESphlox-Control	SPAC1A6.04c	0.964872	-0.0515911	0.969736	-0.0443366	0.960883	-0.0575668	0.966326	-0.0494185	55	2.04294e-08	8.566e-08	7.06722	0.0394776	FALSE
YESphlox-Control	SPAC1B9.02c	1.00472	0.00679865	1.00979	0.0140532	1.00766	0.0110116	1.01337	0.01916	54	0.203367	0.253149	0.596623	0.0256702	FALSE
YESphlox-Control	SPAC1D4.03c	0.989862	-0.0147001	0.994852	-0.00744559	0.994368	-0.00814833	1	0	55	0.0600805	0.0880935	1.05506	0.0384023	FALSE
YESphlox-Control	SPAC1F3.09	0.990969	-0.0130881	0.995965	-0.00583355	0.992486	-0.0108815	0.998107	-0.00273321	55	0.0260927	0.0427134	1.36944	0.028184	FALSE
YESphlox-Control	SPAC1F8.06	0.987421	-0.0182623	0.992399	-0.0110078	0.986898	-0.0190274	0.992488	-0.0108791	55	0.0837523	0.118443	0.926492	0.0525145	FALSE
YESphlox-Control	SPAC20G4.05c	1.02893	0.0411398	1.03411	0.0483943	1.03367	0.0477788	1.03953	0.0559272	55	5.66818e-07	1.9922e-06	5.70067	0.037476	FALSE
YESphlox-Control	SPAC20H4.03c	0.964389	-0.052313	0.969251	-0.0450585	0.968243	-0.0465583	0.973728	-0.03841	55	2.82607e-12	2.17881e-11	10.6618	0.0295684	FALSE
YESphlox-Control	SPAC21E11.04	1.00153	0.00220088	1.00658	0.00945541	1.00114	0.00164086	1.00681	0.0097892	54	0.712805	0.754716	0.122217	0.0291805	FALSE
YESphlox-Control	SPAC227.17c	0.977372	-0.03302	0.982299	-0.0257654	0.984273	-0.0228693	0.989848	-0.014721	55	0.00321314	0.00645327	2.19022	0.0540826	FALSE
YESphlox-Control	SPAC22A12.06c	1.01535	0.0219743	1.02047	0.0292288	1.01444	0.0206803	1.02018	0.0288287	54	2.29715e-05	6.16874e-05	4.2098	0.0233357	FALSE
YESphlox-Control	SPAC22A12.14c	1.01801	0.0257537	1.02314	0.0330082	1.01471	0.0210638	1.02045	0.0292121	55	3.22059e-06	9.7433e-06	5.01129	0.0249253	FALSE
YESphlox-Control	SPAC22E12.14c	0.945705	-0.080538	0.950472	-0.0732835	0.957591	-0.0625184	0.963015	-0.0543701	55	1.07526e-09	5.46783e-09	8.26218	0.054828	FALSE
YESphlox-Control	SPAC22F3.04	1.01048	0.0150367	1.01557	0.0222912	1.00993	0.0142482	1.01565	0.0223966	55	0.0203156	0.0344356	1.46299	0.0315605	FALSE
YESphlox-Control	SPAC23A1.06c	1.00884	0.0126974	1.01393	0.0199519	1.00227	0.00327479	1.00795	0.0114231	55	0.0271465	0.043836	1.35817	0.027752	FALSE
YESphlox-Control	SPAC23C11.08	0.995927	-0.00588756	1.00095	0.00136696	0.994368	-0.00814833	1	0	55	0.215203	0.266495	0.574311	0.022572	FALSE
YESphlox-Control	SPAC23C4.09c	1.02326	0.0331748	1.02842	0.0404293	1.01355	0.0194201	1.01929	0.0275684	55	2.31035e-06	7.07916e-06	5.15002	0.0321109	FALSE
YESphlox-Control	SPAC23D3.03c	1.00801	0.0115089	1.01309	0.0187634	1.01157	0.0165967	1.0173	0.024745	55	0.140981	0.185135	0.732513	0.0390035	FALSE
YESphlox-Control	SPAC23D3.04c	0.962103	-0.055737	0.966953	-0.0484825	0.968887	-0.0455994	0.974375	-0.037451	55	1.46843e-06	4.8076e-06	5.31807	0.051794	FALSE
YESphlox-Control	SPAC23G3.05c	0.987241	-0.0185251	0.992218	-0.0112706	0.992074	-0.0114802	0.997693	-0.00333189	55	0.0042841	0.00839263	2.0761	0.0308239	FALSE
YESphlox-Control	SPAC23H4.09	1.02858	0.0406503	1.03376	0.0479048	1.03081	0.0437763	1.03665	0.0519246	55	1.0696e-08	4.73398e-08	7.32477	0.0311282	FALSE
YESphlox-Control	SPAC24H6.04	1.00824	0.0118435	1.01333	0.019098	1.00477	0.00686472	1.01046	0.015013	55	0.0586198	0.0864823	1.06307	0.0306282	FALSE
YESphlox-Control	SPAC25A8.03c	0.997303	-0.00389548	1.00233	0.00335904	1.00252	0.00362771	1.0082	0.011776	55	0.487179	0.546647	0.262293	0.0273411	FALSE
YESphlox-Control	SPAC25B8.08	1.00758	0.0108942	1.01266	0.0181487	1.00793	0.0113934	1.01364	0.0195417	55	0.0674038	0.0976334	1.0104	0.0290266	FALSE
YESphlox-Control	SPAC26F1.10c	0.850841	-0.233038	0.85513	-0.225784	0.845963	-0.241333	0.850755	-0.233184	55	3.54732e-28	2.11953e-26	25.6738	0.0530686	TRUE
YESphlox-Control	SPAC26F1.12c	0.990638	-0.01357	0.995632	-0.00631553	0.993435	-0.009502	0.999062	-0.00135366	55	0.00921011	0.017197	1.76455	0.0244629	FALSE
YESphlox-Control	SPAC27E2.03c	0.991406	-0.0124519	0.996404	-0.00519741	0.989777	-0.0148249	0.995383	-0.00667654	55	0.167038	0.215795	0.665959	0.044898	FALSE
YESphlox-Control	SPAC29A4.20	0.985147	-0.0215884	0.990114	-0.0143339	0.98769	-0.0178704	0.993284	-0.0097221	55	0.0200011	0.0341448	1.46668	0.0454089	FALSE
YESphlox-Control	SPAC2F3.18c	1.00135	0.00195226	1.0064	0.00920678	0.996995	-0.00434151	1.00264	0.00380683	55	0.713664	0.754716	0.122217	0.0258915	FALSE
YESphlox-Control	SPAC32A11.03c	1.0131	0.0187819	1.01821	0.0260365	1.00474	0.00682652	1.01043	0.0149749	55	0.108102	0.145148	0.838189	0.059151	FALSE
YESphlox-Control	SPAC3A11.02	0.977096	-0.0334278	0.982022	-0.0261733	0.9756	-0.0356389	0.981125	-0.0274906	55	2.67508e-08	1.06557e-07	6.97242	0.0256377	FALSE
YESphlox-Control	SPAC3A11.10c	1.00639	0.00918258	1.01146	0.0164371	1.00371	0.00534414	1.0094	0.0134925	55	0.112239	0.149028	0.826731	0.0281788	FALSE
YESphlox-Control	SPAC3A11.11c	1.00909	0.0130585	1.01418	0.020313	1.00825	0.0118591	1.01396	0.0200074	55	0.00417723	0.00825088	2.0835	0.0211208	FALSE
YESphlox-Control	SPAC3A12.03c	1.0313	0.044462	1.0365	0.0517165	1.03009	0.0427656	1.03592	0.050914	55	7.94734e-14	9.49708e-13	12.0224	0.0235315	FALSE
YESphlox-Control	SPAC3A12.13c	0.98455	-0.0224641	0.989513	-0.0152096	0.995004	-0.00722627	1.00064	0.000922066	55	0.182765	0.233587	0.631551	0.0848822	FALSE
YESphlox-Control	SPAC3G6.03c	0.982672	-0.0252181	0.987626	-0.0179636	0.985753	-0.0207023	0.991336	-0.012554	55	6.48413e-08	2.49953e-07	6.60214	0.0196896	FALSE
YESphlox-Control	SPAC3G6.05	0.993118	-0.00996334	0.998124	-0.00270882	0.991318	-0.01258	0.996933	-0.00443163	55	0.0732751	0.105498	0.976754	0.0267337	FALSE
YESphlox-Control	SPAC3G9.11c	0.962464	-0.0551957	0.967316	-0.0479412	0.965487	-0.0506718	0.970955	-0.0425234	55	2.4882e-12	1.98227e-11	10.7028	0.0310672	FALSE
YESphlox-Control	SPAC3H1.03	0.993965	-0.0087324	0.998976	-0.00147787	0.997588	-0.00348453	1.00324	0.0046638	51	0.144031	0.188106	0.725597	0.0279645	FALSE
YESphlox-Control	SPAC3H1.08c	0.992839	-0.0103678	0.997844	-0.00311332	0.993349	-0.00962776	0.998975	-0.00147943	54	0.0461459	0.0711539	1.1478	0.0244815	FALSE
YESphlox-Control	SPAC3H1.11	0.99497	-0.0072746	0.999986	-2.00807e-05	0.994368	-0.00814833	1	0	54	0.27994	0.33621	0.47339	0.032904	FALSE
YESphlox-Control	SPAC3H5.08c	0.910742	-0.134886	0.915333	-0.127631	0.908363	-0.13866	0.913508	-0.130511	55	1.74985e-21	6.97022e-20	19.1568	0.0439699	TRUE
YESphlox-Control	SPAC3H5.09c	1.01017	0.0146002	1.01526	0.0218547	1.00625	0.00898537	1.01195	0.0171337	55	0.0136141	0.024102	1.61795	0.0285247	FALSE
YESphlox-Control	SPAC3H5.10	0.904289	-0.145144	0.908847	-0.13789	0.914001	-0.129732	0.919178	-0.121584	55	1.45026e-13	1.50701e-12	11.8219	0.0729872	TRUE
YESphlox-Control	SPAC3H8.03	0.974905	-0.036666	0.97982	-0.0294115	0.972961	-0.0395465	0.978472	-0.0313982	55	9.9312e-08	3.76755e-07	6.42394	0.0298427	FALSE
YESphlox-Control	SPAC3H8.04	1.01081	0.0155109	1.0159	0.0227654	1.01073	0.015392	1.01645	0.0235403	55	0.00172028	0.00363847	2.43908	0.0230582	FALSE
YESphlox-Control	SPAC4G9.11c	1.00019	0.000270023	1.00523	0.00752454	0.9978	-0.00317781	1.00345	0.00497052	53	0.935573	0.951498	0.0215922	0.0144426	FALSE
YESphlox-Control	SPAC4G9.14	0.991594	-0.0121779	0.996593	-0.00492335	0.994368	-0.00814833	1	0	55	0.0319827	0.0502885	1.29853	0.0271638	FALSE
YESphlox-Control	SPAC4H3.04c	1.03967	0.0561194	1.04491	0.0633739	1.03357	0.0476346	1.03942	0.0557829	54	1.585e-08	6.88669e-08	7.16199	0.0436824	FALSE
YESphlox-Control	SPAC4H3.06	1.02124	0.0303218	1.02639	0.0375764	1.01804	0.0257925	1.0238	0.0339409	55	9.44168e-07	3.27038e-06	5.4854	0.0278539	FALSE
YESphlox-Control	SPAC4H3.07c	0.897635	-0.155799	0.90216	-0.148545	0.895696	-0.158918	0.900769	-0.15077	55	4.69778e-20	1.12277e-18	17.9497	0.0538881	TRUE
YESphlox-Control	SPAC521.03	0.999919	-0.000116776	1.00496	0.00713775	0.996747	-0.00470128	1.00239	0.00344705	55	0.983563	0.991863	0.00354831	0.0277684	FALSE
YESphlox-Control	SPAC56F8.02	0.95992	-0.0590135	0.964759	-0.051759	0.963469	-0.0536891	0.968927	-0.0455408	55	1.44753e-06	4.80501e-06	5.31831	0.054783	FALSE
YESphlox-Control	SPAC57A7.09	1.01766	0.0252522	1.02279	0.0325067	1.01497	0.021441	1.02072	0.0295894	55	2.15799e-06	6.78631e-06	5.16837	0.0238631	FALSE
YESphlox-Control	SPAC589.07c	1.01088	0.0156101	1.01597	0.0228646	1.01084	0.0155539	1.01656	0.0237023	55	0.0089906	0.0170536	1.76818	0.0287478	FALSE
YESphlox-Control	SPAC5H10.06c	1.00747	0.0107408	1.01255	0.0179953	1.00705	0.0101341	1.01275	0.0182824	55	0.0891308	0.12385	0.907103	0.0309978	FALSE
YESphlox-Control	SPAC637.07	0.972056	-0.0408887	0.976956	-0.0336342	0.98695	-0.0189514	0.99254	-0.0108031	55	0.00109365	0.00242021	2.61615	0.0598456	FALSE
YESphlox-Control	SPAC652.01	0.984784	-0.0221201	0.989749	-0.0148655	0.988282	-0.0170046	0.99388	-0.00885627	55	0.00660945	0.0126373	1.89835	0.0392936	FALSE
YESphlox-Control	SPAC683.02c	1.00311	0.00447895	1.00817	0.0117335	1.00563	0.00809501	1.01132	0.0162433	55	0.430814	0.490308	0.309531	0.0278378	FALSE
YESphlox-Control	SPAC688.03c	1.01411	0.0202181	1.01923	0.0274726	1.01405	0.0201247	1.01979	0.0282731	55	5.77276e-06	1.66228e-05	4.7793	0.0196805	FALSE
YESphlox-Control	SPAC688.13	0.991638	-0.0121143	0.996637	-0.00485982	0.989563	-0.015137	0.995168	-0.00698864	55	0.00919883	0.017197	1.76455	0.0215193	FALSE
YESphlox-Control	SPAC694.02	0.98913	-0.0157682	0.994116	-0.00851364	0.99698	-0.00436373	1.00263	0.0037846	55	0.287218	0.343226	0.46442	0.0748683	FALSE
YESphlox-Control	SPAC694.04c	1.00423	0.00609478	1.0093	0.0133493	1.00439	0.0063243	1.01008	0.0144726	54	0.266963	0.323879	0.489618	0.0264844	FALSE
YESphlox-Control	SPAC694.06c	0.952669	-0.069953	0.957472	-0.0626985	0.955559	-0.0655833	0.960971	-0.0574349	55	4.52027e-10	2.56937e-09	8.59017	0.0463044	FALSE
YESphlox-Control	SPAC6F12.02	0.951659	-0.0714829	0.956457	-0.0642283	0.944823	-0.0818844	0.950174	-0.0737361	55	1.46256e-07	5.37773e-07	6.2694	0.0593502	TRUE
YESphlox-Control	SPAC6F6.13c	0.998514	-0.00214487	1.00355	0.00510965	0.994368	-0.00814833	1	0	54	0.591583	0.64857	0.188043	0.0183412	FALSE
YESphlox-Control	SPAC6G10.10c	0.993841	-0.00891373	0.998851	-0.00165921	0.993672	-0.00915882	0.9993	-0.00101048	55	0.100709	0.136758	0.864047	0.026098	FALSE
YESphlox-Control	SPAC7D4.05	1.02631	0.0374651	1.03148	0.0447197	1.02364	0.0337137	1.02944	0.041862	55	3.04333e-08	1.19239e-07	6.92358	0.0298034	FALSE
YESphlox-Control	SPAC806.04c	0.99782	-0.00314872	1.00285	0.0041058	0.995676	-0.00625172	1.00132	0.00189661	54	0.521338	0.582242	0.234897	0.0233577	FALSE
YESphlox-Control	SPAC806.07	0.985836	-0.0205798	0.990806	-0.0133253	0.988577	-0.016575	0.994176	-0.0084267	55	0.000978293	0.00220577	2.65644	0.0292207	FALSE
YESphlox-Control	SPAC821.05	0.969817	-0.0442154	0.974706	-0.0369609	0.978505	-0.0313483	0.984048	-0.0231999	55	8.88395e-05	0.000228308	3.64148	0.0525769	FALSE
YESphlox-Control	SPAC821.07c	1.1063	0.14574	1.11188	0.152995	1.1052	0.14431	1.11146	0.152458	55	1.20654e-17	1.92241e-16	15.7162	0.0635206	TRUE
YESphlox-Control	SPAC823.09c	1.00757	0.0108806	1.01265	0.0181351	1.00368	0.00529969	1.00937	0.013448	55	0.190036	0.24031	0.619228	0.0416138	FALSE
YESphlox-Control	SPAC823.16c	1.02724	0.0387698	1.03242	0.0460243	1.02172	0.0310024	1.02751	0.0391507	55	0.000518283	0.00122643	2.91136	0.0544289	FALSE
YESphlox-Control	SPAC890.03	1.00002	3.25695e-05	1.00506	0.00728709	0.998688	-0.00189431	1.00434	0.00625402	55	0.996471	1	0	0.0368233	FALSE
YESphlox-Control	SPAC8C9.06c	0.466935	-1.09871	0.469289	-1.09145	0.472547	-1.08147	0.475224	-1.07332	53	3.37917e-21	8.97357e-20	19.047	0.251011	TRUE
YESphlox-Control	SPAC8C9.16c	0.975307	-0.0360722	0.980223	-0.0288177	0.978377	-0.0315378	0.983918	-0.0233895	55	5.10967e-10	2.77548e-09	8.55666	0.023904	FALSE
YESphlox-Control	SPAC8F11.03	1.00621	0.00893083	1.01128	0.0161854	1.00645	0.00927883	1.01215	0.0174272	55	0.0955779	0.132041	0.879291	0.025882	FALSE
YESphlox-Control	SPAC977.15	1.00547	0.00786347	1.01053	0.015118	1.0058	0.00834075	1.01149	0.0164891	55	0.0834788	0.118443	0.926492	0.0214299	FALSE
YESphlox-Control	SPACUNK4.13c	1.03088	0.0438711	1.03607	0.0511256	1.02465	0.0351328	1.03045	0.0432811	55	6.60755e-11	4.26812e-10	9.36976	0.028151	FALSE
YESphlox-Control	SPACUNK4.16c	0.962075	-0.0557794	0.966924	-0.0485249	0.96073	-0.0577971	0.966172	-0.0496488	54	2.05027e-12	1.75005e-11	10.7569	0.0307979	FALSE
YESphlox-Control	SPACUNK4.17	1.01383	0.0198129	1.01894	0.0270674	1.00914	0.0131318	1.01486	0.0212802	53	0.000829253	0.00188754	2.7241	0.0274461	FALSE
YESphlox-Control	SPAP14E8.05c	1.00398	0.00572645	1.00904	0.012981	0.999125	-0.00126236	1.00478	0.00688598	55	0.404153	0.464387	0.33312	0.0341398	FALSE
YESphlox-Control	SPAP27G11.12	0.996415	-0.00518148	1.00144	0.00207305	0.999134	-0.00124959	1.00479	0.00689874	55	0.437928	0.496042	0.304481	0.0330393	FALSE
YESphlox-Control	SPAP8A3.04c	1.02515	0.0358397	1.03032	0.0430942	1.02364	0.0337141	1.02944	0.0418624	55	1.45737e-05	4.05013e-05	4.39253	0.0386966	FALSE
YESphlox-Control	SPAPB1A11.02	1.03044	0.0432647	1.03564	0.0505192	1.02744	0.0390541	1.03326	0.0472024	55	5.02112e-09	2.35303e-08	7.62837	0.0322665	FALSE
YESphlox-Control	SPAPB1E7.11c	1.05163	0.072632	1.05693	0.0798865	1.0461	0.0650142	1.05202	0.0731625	55	2.97803e-21	8.89688e-20	19.0508	0.0264243	FALSE
YESphlox-Control	SPAPB24D3.08c	0.991183	-0.0127765	0.99618	-0.00552199	0.994269	-0.00829191	0.9999	-0.000143572	55	0.000819285	0.00188278	2.7252	0.0167278	FALSE
YESphlox-Control	SPAPB2B4.07	1.01091	0.0156543	1.01601	0.0229088	1.01099	0.0157719	1.01672	0.0239202	54	0.109992	0.146861	0.833093	0.0488259	FALSE
YESphlox-Control	SPBC106.10	1.00847	0.0121653	1.01355	0.0194198	1.0112	0.0160624	1.01692	0.0242107	55	0.198825	0.248792	0.604164	0.0477293	FALSE
YESphlox-Control	SPBC1105.05	0.939799	-0.0895764	0.944536	-0.0823219	0.933036	-0.0999958	0.93832	-0.0918475	55	4.37026e-17	6.52807e-16	15.1852	0.0374462	TRUE
YESphlox-Control	SPBC1105.14	1.06997	0.0975759	1.07537	0.10483	1.07108	0.0990659	1.07715	0.107214	54	1.95907e-11	1.41884e-10	9.84807	0.0609584	TRUE
YESphlox-Control	SPBC119.03	1.00153	0.00220025	1.00658	0.00945477	0.997516	-0.00358799	1.00317	0.00456034	55	0.685791	0.734996	0.133715	0.0265316	FALSE
YESphlox-Control	SPBC119.16c	0.979222	-0.0302927	0.984158	-0.0230382	0.977509	-0.0328181	0.983046	-0.0246698	55	1.22974e-07	4.59233e-07	6.33797	0.0246882	FALSE
YESphlox-Control	SPBC1198.07c	1.00173	0.0024962	1.00678	0.00975072	0.995569	-0.00640709	1.00121	0.00174125	55	0.631391	0.689053	0.161748	0.0252475	FALSE
YESphlox-Control	SPBC1198.11c	0.83453	-0.260965	0.838737	-0.25371	0.835681	-0.258976	0.840414	-0.250828	55	3.18651e-31	3.80788e-29	28.4193	0.0514403	TRUE
YESphlox-Control	SPBC1198.14c	1.02252	0.0321358	1.02768	0.0393903	1.01994	0.0284913	1.02572	0.0366396	55	1.06251e-08	4.73398e-08	7.32477	0.0242656	FALSE
YESphlox-Control	SPBC11B10.10c	0.844779	-0.243353	0.849038	-0.236099	0.834876	-0.260367	0.839604	-0.252218	55	6.42414e-36	1.53537e-33	32.8138	0.0403533	TRUE
YESphlox-Control	SPBC14C8.15	1.00046	0.000660166	1.0055	0.00791469	0.996191	-0.00550511	1.00183	0.00264322	55	0.911103	0.930571	0.0312505	0.0290945	FALSE
YESphlox-Control	SPBC14C8.16c	0.982316	-0.0257412	0.987268	-0.0184867	0.985567	-0.0209737	0.99115	-0.0128254	55	0.0131324	0.0234228	1.63036	0.0507124	FALSE
YESphlox-Control	SPBC14F5.10c	1.02796	0.0397814	1.03314	0.0470359	1.02601	0.0370448	1.03182	0.0451932	55	2.30713e-09	1.14876e-08	7.93977	0.0287062	FALSE
YESphlox-Control	SPBC1539.02	0.988531	-0.0166422	0.993514	-0.0093877	0.989223	-0.0156322	0.994826	-0.00748389	55	0.00118289	0.00259367	2.58609	0.0236545	FALSE
YESphlox-Control	SPBC15C4.06c	1.01286	0.0184298	1.01796	0.0256843	1.01028	0.0147551	1.016	0.0229034	55	7.58703e-06	2.15869e-05	4.66581	0.0179705	FALSE
YESphlox-Control	SPBC15D4.05	0.995955	-0.005848	1.00098	0.00140652	0.994368	-0.00814833	1	0	55	0.322121	0.377387	0.423213	0.0288688	FALSE
YESphlox-Control	SPBC1604.16c	1.00943	0.0135391	1.01452	0.0207936	1.0103	0.0147845	1.01602	0.0229329	55	0.0123732	0.0222677	1.65232	0.0258418	FALSE
YESphlox-Control	SPBC16A3.02c	1.00688	0.00988519	1.01195	0.0171397	1.01143	0.0163992	1.01716	0.0245476	55	0.0479719	0.0734954	1.13374	0.0238394	FALSE
YESphlox-Control	SPBC16A3.08c	0.931106	-0.102983	0.9358	-0.0957284	0.942273	-0.0857825	0.94761	-0.0776342	55	9.4748e-13	8.38695e-12	11.0764	0.0554856	TRUE
YESphlox-Control	SPBC16C6.01c	1.0327	0.0464214	1.03791	0.0536759	1.03858	0.0546102	1.04446	0.0627585	54	3.47352e-09	1.66034e-08	7.7798	0.033825	FALSE
YESphlox-Control	SPBC16D10.08c	0.942757	-0.0850424	0.947509	-0.0777879	0.937912	-0.0924749	0.943225	-0.0843266	54	1.77935e-19	3.54387e-18	17.4505	0.0310843	TRUE
YESphlox-Control	SPBC16E9.13	1.0184	0.0263018	1.02353	0.0335563	1.01762	0.0251979	1.02338	0.0333462	54	0.00144136	0.00310714	2.50764	0.0396427	FALSE
YESphlox-Control	SPBC16E9.16c	1.00882	0.0126739	1.01391	0.0199285	1.01164	0.0166916	1.01737	0.0248399	55	0.0564881	0.0854472	1.0683	0.0326405	FALSE
YESphlox-Control	SPBC16H5.13	1.01501	0.0214904	1.02012	0.0287449	1.01213	0.0173979	1.01786	0.0255462	55	0.000546279	0.00128001	2.89279	0.0294112	FALSE
YESphlox-Control	SPBC16H5.14c	1.00994	0.0142746	1.01503	0.0215291	1.0072	0.0103454	1.0129	0.0184937	55	0.0570031	0.0856839	1.0671	0.0371354	FALSE
YESphlox-Control	SPBC1709.09	1.0032	0.00460214	1.00825	0.0118567	1.00223	0.00321115	1.0079	0.0113595	55	0.568158	0.625759	0.203593	0.0405171	FALSE
YESphlox-Control	SPBC1778.07	1.00243	0.00349773	1.00748	0.0107522	0.996372	-0.00524305	1.00202	0.00290528	55	0.649052	0.705107	0.151745	0.0385344	FALSE
YESphlox-Control	SPBC17G9.07	0.854258	-0.227256	0.858565	-0.220001	0.878821	-0.186358	0.883799	-0.17821	55	2.70323e-09	1.31851e-08	7.87992	0.152662	TRUE
YESphlox-Control	SPBC17G9.09	1.00955	0.0137062	1.01463	0.0209607	1.00443	0.00637311	1.01012	0.0145214	55	0.0284456	0.0453233	1.34368	0.0304486	FALSE
YESphlox-Control	SPBC1861.02	1.06269	0.0877192	1.06805	0.0949737	1.06815	0.0951088	1.0742	0.103257	55	1.61245e-11	1.2043e-10	9.91927	0.0550108	TRUE
YESphlox-Control	SPBC18A7.01	1.00465	0.00669364	1.00972	0.0139482	1.00043	0.000625861	1.0061	0.00877419	55	0.138026	0.182256	0.739319	0.0213217	FALSE
YESphlox-Control	SPBC18E5.10	0.986638	-0.0194067	0.991612	-0.0121521	0.994368	-0.00814833	1	0	55	0.0258057	0.0425349	1.37125	0.0426187	FALSE
YESphlox-Control	SPBC18H10.02	0.826219	-0.275404	0.830384	-0.26815	0.846456	-0.240493	0.85125	-0.232345	55	4.51797e-18	7.71283e-17	16.1128	0.10101	TRUE
YESphlox-Control	SPBC18H10.04c	0.954029	-0.0678952	0.958838	-0.0606407	0.968877	-0.045614	0.974365	-0.0374656	55	5.34583e-06	1.59707e-05	4.79668	0.0674971	FALSE
YESphlox-Control	SPBC18H10.05	1.01997	0.0285254	1.02511	0.03578	1.01793	0.0256338	1.02369	0.0337822	55	1.14042e-06	3.89373e-06	5.40963	0.0263387	FALSE
YESphlox-Control	SPBC19C7.01	0.996759	-0.00468284	1.00178	0.00257168	0.996242	-0.00543247	1.00188	0.00271586	55	0.399316	0.461046	0.336255	0.0270345	FALSE
YESphlox-Control	SPBC1D7.03	0.871753	-0.198009	0.876148	-0.190754	0.870445	-0.200176	0.875375	-0.192027	55	9.28801e-30	7.39945e-28	27.1308	0.0430876	TRUE
YESphlox-Control	SPBC20F10.02c	0.984464	-0.0225901	0.989426	-0.0153356	0.989752	-0.0148617	0.995357	-0.00671337	55	0.00019163	0.000477078	3.32141	0.0278979	FALSE
YESphlox-Control	SPBC20F10.03	1.00136	0.00196655	1.00641	0.00922108	1.00536	0.00771726	1.01106	0.0158656	55	0.767491	0.804519	0.0944638	0.0330503	FALSE
YESphlox-Control	SPBC21.03c	0.990193	-0.0142176	0.995185	-0.00696312	0.987953	-0.0174857	0.993549	-0.00933734	55	0.0122957	0.0222677	1.65232	0.0269561	FALSE
YESphlox-Control	SPBC215.05	0.947402	-0.0779513	0.952178	-0.0706967	0.95257	-0.0701034	0.957965	-0.0619551	55	5.67544e-06	1.65418e-05	4.78142	0.0775788	FALSE
YESphlox-Control	SPBC215.06c	0.994508	-0.00794457	0.999522	-0.000690054	0.991568	-0.0122167	0.997184	-0.0040684	55	0.100591	0.136758	0.864047	0.0229257	FALSE
YESphlox-Control	SPBC21C3.03	0.998722	-0.00184545	1.00376	0.00540908	1.01216	0.0174319	1.01789	0.0255802	55	0.885062	0.919695	0.0363561	0.0650036	FALSE
YESphlox-Control	SPBC21C3.08c	1.00882	0.0126758	1.01391	0.0199304	1.00917	0.0131684	1.01489	0.0213167	54	0.0199338	0.0341448	1.46668	0.0258478	FALSE
YESphlox-Control	SPBC21C3.14c	0.998494	-0.00217438	1.00353	0.00508014	0.999354	-0.000932122	1.00501	0.00721621	55	0.660969	0.711584	0.147774	0.0238676	FALSE
YESphlox-Control	SPBC21C3.18	1.03433	0.0486965	1.03954	0.055951	1.03065	0.0435565	1.03649	0.0517048	55	3.56186e-16	4.48044e-15	14.3487	0.0226595	FALSE
YESphlox-Control	SPBC25B2.04c	0.945173	-0.0813498	0.949938	-0.0740952	0.93782	-0.0926165	0.943132	-0.0844682	53	2.67602e-11	1.82734e-10	9.73818	0.0475612	TRUE
YESphlox-Control	SPBC25H2.14	1.00849	0.012201	1.01358	0.0194555	0.999875	-0.000180716	1.00554	0.00796762	55	0.0850703	0.119599	0.922273	0.0350444	FALSE
YESphlox-Control	SPBC28F2.03	0.978667	-0.0311107	0.9836	-0.0238561	0.980167	-0.028901	0.985718	-0.0207527	55	5.51263e-06	1.62657e-05	4.78873	0.0307703	FALSE
YESphlox-Control	SPBC2D10.03c	1.01502	0.0215143	1.02014	0.0287688	1.01099	0.0157689	1.01672	0.0239172	51	1.65893e-05	4.55729e-05	4.34129	0.0215798	FALSE
YESphlox-Control	SPBC2D10.05	1.00502	0.00722703	1.01009	0.0144816	1.00831	0.0119463	1.01403	0.0200946	55	0.316708	0.372873	0.428439	0.0359841	FALSE
YESphlox-Control	SPBC2G2.06c	0.986253	-0.0199709	0.991224	-0.0127164	0.98671	-0.0193021	0.992299	-0.0111537	55	0.000123883	0.000311664	3.50631	0.0235794	FALSE
YESphlox-Control	SPBC30D10.10c	0.973917	-0.0381288	0.978827	-0.0308743	0.981589	-0.0268084	0.987149	-0.0186601	55	0.0142715	0.0250801	1.60067	0.0763187	FALSE
YESphlox-Control	SPBC30D10.13c	1.01365	0.0195564	1.01876	0.0268109	1.00796	0.0114398	1.01367	0.0195882	55	0.0188274	0.0326069	1.48669	0.0411572	FALSE
YESphlox-Control	SPBC31E1.01c	1.0156	0.0223316	1.02072	0.0295861	1.0066	0.00949758	1.01231	0.0176459	55	0.00273185	0.00558044	2.25333	0.0361281	FALSE
YESphlox-Control	SPBC32F12.03c	1.00921	0.013221	1.01429	0.0204756	1.00693	0.00996822	1.01264	0.0181166	55	0.00639524	0.0123263	1.90917	0.0227338	FALSE
YESphlox-Control	SPBC32H8.03	0.989661	-0.0149936	0.99465	-0.00773903	0.986531	-0.0195631	0.992119	-0.0114147	55	0.0144197	0.0251555	1.59937	0.0293127	FALSE
YESphlox-Control	SPBC36.07	0.968251	-0.0465477	0.973132	-0.0392932	0.969506	-0.0446788	0.974997	-0.0365305	55	1.9271e-05	5.23384e-05	4.28118	0.0500018	FALSE
YESphlox-Control	SPBC365.12c	1.03459	0.0490527	1.0398	0.0563072	1.0319	0.0453061	1.03775	0.0534544	55	2.63157e-10	1.61268e-09	8.79245	0.0330806	FALSE
YESphlox-Control	SPBC365.20c	1.00164	0.00237053	1.00669	0.00962505	0.995932	-0.00588079	1.00157	0.00226754	55	0.692425	0.738793	0.131477	0.0295242	FALSE
YESphlox-Control	SPBC3B8.02	1.00106	0.00152307	1.0061	0.00877759	1.01603	0.0229394	1.02178	0.0310877	54	0.899712	0.929383	0.0318051	0.0609776	FALSE
YESphlox-Control	SPBC3B8.08	0.995245	-0.00687615	1.00026	0.000378372	0.990865	-0.0132393	0.996477	-0.00509095	55	0.185296	0.235562	0.627894	0.0249333	FALSE
YESphlox-Control	SPBC3E7.07c	1.00353	0.0050891	1.00859	0.0123436	1.00383	0.00550985	1.00951	0.0136582	55	0.297947	0.354051	0.450934	0.0234748	FALSE
YESphlox-Control	SPBC3H7.03c	0.956476	-0.0641987	0.961298	-0.0569442	0.96515	-0.0511743	0.970617	-0.0430259	55	0.00011008	0.000279884	3.55302	0.0773905	FALSE
YESphlox-Control	SPBC3H7.10	0.969272	-0.045026	0.974159	-0.0377715	0.980351	-0.028629	0.985904	-0.0204806	54	0.00035588	0.00087686	3.05707	0.0589779	FALSE
YESphlox-Control	SPBC409.07c	0.977137	-0.0333674	0.982063	-0.0261128	0.987456	-0.018212	0.993049	-0.0100637	55	0.00287496	0.00582302	2.23485	0.0539654	FALSE
YESphlox-Control	SPBC428.08c	1.01601	0.0229146	1.02113	0.0301691	1.01532	0.0219324	1.02107	0.0300808	55	6.02828e-05	0.000160084	3.79565	0.0263919	FALSE
YESphlox-Control	SPBC428.15	1.0029	0.00417322	1.00795	0.0114277	1.00037	0.000529877	1.00603	0.00867821	55	0.356245	0.413313	0.383721	0.0214728	FALSE
YESphlox-Control	SPBC4F6.08c	0.936264	-0.0950119	0.940984	-0.0877574	0.93244	-0.100917	0.937721	-0.0927688	55	4.18863e-10	2.5027e-09	8.60159	0.0622975	TRUE
YESphlox-Control	SPBC543.07	0.923073	-0.115483	0.927727	-0.108228	0.932727	-0.100474	0.93801	-0.0923255	55	7.77218e-10	4.03816e-09	8.39382	0.0769004	TRUE
YESphlox-Control	SPBC646.09c	0.968802	-0.045727	0.973685	-0.0384724	0.981226	-0.0273433	0.986783	-0.0191949	55	0.000450902	0.00108854	2.96316	0.061746	FALSE
YESphlox-Control	SPBC646.13	0.999593	-0.000587404	1.00463	0.00666712	0.994368	-0.00814833	1	0	55	0.902163	0.929383	0.0318051	0.0229133	FALSE
YESphlox-Control	SPBC649.04	1.00145	0.00209588	1.0065	0.0093504	0.997652	-0.00339117	1.0033	0.00475716	54	0.656589	0.710066	0.148701	0.0223563	FALSE
YESphlox-Control	SPBC660.10	0.969001	-0.0454299	0.973886	-0.0381754	0.970118	-0.0437684	0.975612	-0.0356201	55	1.70614e-06	5.51037e-06	5.25882	0.042525	FALSE
YESphlox-Control	SPBC685.04c	0.990642	-0.0135642	0.995636	-0.00630969	0.988887	-0.0161226	0.994488	-0.00797431	55	0.0123917	0.0222677	1.65232	0.0256333	FALSE
YESphlox-Control	SPBC691.03c	0.972228	-0.040634	0.977129	-0.0333795	0.972955	-0.0395545	0.978466	-0.0314062	55	2.53352e-08	1.02629e-07	6.98873	0.0312877	FALSE
YESphlox-Control	SPBC725.11c	0.92652	-0.110106	0.931191	-0.102851	0.938502	-0.0915679	0.943818	-0.0834195	55	9.1192e-17	1.28205e-15	14.8921	0.0463323	TRUE
YESphlox-Control	SPBC776.01	0.982343	-0.0257017	0.987295	-0.0184472	0.993918	-0.00880116	0.999548	-0.000652822	54	0.00145607	0.00310714	2.50764	0.0380213	FALSE
YESphlox-Control	SPBC947.05c	1.02674	0.0380681	1.03191	0.0453227	1.02574	0.0366607	1.03155	0.0448091	54	1.15312e-10	7.25255e-10	9.13951	0.0244019	FALSE
YESphlox-Control	SPBC947.09	1.01049	0.0150607	1.01559	0.0223152	1.00654	0.00940068	1.01224	0.017549	55	0.00349488	0.00696063	2.15735	0.024274	FALSE
YESphlox-Control	SPBC9B6.03	1.04937	0.0695203	1.05466	0.0767748	1.05905	0.0827674	1.06505	0.0909157	54	8.04203e-05	0.000208918	3.68002	0.0850097	TRUE
YESphlox-Control	SPBP22H7.04	0.981417	-0.0270615	0.986365	-0.019807	0.979528	-0.0298417	0.985076	-0.0216934	55	1.25129e-06	4.21209e-06	5.3755	0.0244988	FALSE
YESphlox-Control	SPBP35G2.11c	1.00547	0.00786363	1.01053	0.0151182	1.00994	0.0142711	1.01566	0.0224194	55	0.193121	0.242926	0.614526	0.0296572	FALSE
YESphlox-Control	SPBP8B7.27	1.01626	0.0232762	1.02139	0.0305307	1.0145	0.0207648	1.02024	0.0289131	55	4.16281e-07	1.48494e-06	5.82829	0.020014	FALSE
YESphlox-Control	SPBP8B7.31	1.0346	0.0490738	1.03982	0.0563283	1.03092	0.043926	1.03675	0.0520744	55	4.63987e-13	4.43572e-12	11.353	0.0272932	FALSE
YESphlox-Control	SPBPB21E7.04c	1.01457	0.0208616	1.01968	0.0281161	1.0184	0.0263106	1.02417	0.0344589	55	0.000709881	0.0016472	2.78325	0.0291871	FALSE
YESphlox-Control	SPBPJ4664.05	0.99458	-0.00784019	0.999594	-0.000585673	0.994368	-0.00814833	1	0	55	0.0618235	0.0900964	1.04529	0.0193603	FALSE
YESphlox-Control	SPCC1020.08	1.00249	0.00359393	1.00755	0.0108484	0.99545	-0.00657961	1.00109	0.00156872	55	0.562968	0.622913	0.205572	0.0306964	FALSE
YESphlox-Control	SPCC1235.03	1.00206	0.00296764	1.00711	0.0102222	0.998686	-0.00189718	1.00434	0.00625115	55	0.539685	0.599929	0.2219	0.0232453	FALSE
YESphlox-Control	SPCC1259.02c	0.986497	-0.0196127	0.991471	-0.0123582	0.979687	-0.0296066	0.985236	-0.0214583	55	0.0580532	0.0864823	1.06307	0.0512647	FALSE
YESphlox-Control	SPCC126.12	0.979872	-0.0293346	0.984812	-0.02208	0.978284	-0.0316745	0.983825	-0.0235262	55	1.61362e-08	6.88669e-08	7.16199	0.0218757	FALSE
YESphlox-Control	SPCC1393.13	0.965334	-0.0509004	0.9702	-0.0436458	0.971848	-0.0411973	0.977353	-0.033049	55	7.98871e-05	0.000208918	3.68002	0.0600776	FALSE
YESphlox-Control	SPCC13B11.01	1.00468	0.0067338	1.00974	0.0139883	1.00623	0.00896184	1.01193	0.0171102	54	0.35194	0.41031	0.386887	0.0357492	FALSE
YESphlox-Control	SPCC1494.08c	0.916204	-0.12626	0.920822	-0.119005	0.916871	-0.12521	0.922064	-0.117061	55	3.00285e-19	5.52062e-18	17.258	0.0461826	TRUE
YESphlox-Control	SPCC162.12	1.00123	0.00177053	1.00628	0.00902505	0.99844	-0.00225289	1.00409	0.00589544	55	0.77331	0.807079	0.0930839	0.0303524	FALSE
YESphlox-Control	SPCC1620.03	1.00892	0.0128172	1.01401	0.0200717	1.00807	0.011597	1.01378	0.0197453	55	0.0265879	0.0432279	1.36424	0.0279232	FALSE
YESphlox-Control	SPCC16A11.08	1.01625	0.0232513	1.02137	0.0305058	1.0231	0.0329449	1.02889	0.0410933	55	0.00145467	0.00310714	2.50764	0.0351981	FALSE
YESphlox-Control	SPCC16C4.11	0.992792	-0.0104368	0.997797	-0.00318232	0.994368	-0.00814833	1	0	55	0.179028	0.230041	0.638194	0.0384907	FALSE
YESphlox-Control	SPCC1753.02c	0.939583	-0.089907	0.94432	-0.0826525	0.940621	-0.0883149	0.945948	-0.0801666	55	1.17246e-13	1.27372e-12	11.8949	0.0458745	TRUE
YESphlox-Control	SPCC188.02	1.00754	0.0108302	1.01261	0.0180847	1.00965	0.0138584	1.01537	0.0220068	55	0.463202	0.522195	0.282167	0.0755041	FALSE
YESphlox-Control	SPCC18B5.03	1.01119	0.0160509	1.01629	0.0233055	1.00388	0.00558675	1.00957	0.0137351	54	0.00267467	0.00551074	2.25879	0.0249684	FALSE
YESphlox-Control	SPCC24B10.18	0.970908	-0.0425929	0.975803	-0.0353383	0.974196	-0.0377162	0.979714	-0.0295679	55	4.54761e-10	2.56937e-09	8.59017	0.028231	FALSE
YESphlox-Control	SPCC320.03	1.01986	0.0283765	1.02501	0.035631	1.013	0.0186341	1.01874	0.0267825	55	2.23812e-06	6.9469e-06	5.15821	0.0271381	FALSE
YESphlox-Control	SPCC320.07c	1.03246	0.0460874	1.03767	0.0533419	1.02535	0.0361141	1.03116	0.0442624	54	2.12106e-08	8.74022e-08	7.05848	0.0360367	FALSE
YESphlox-Control	SPCC338.04	0.993081	-0.0100168	0.998087	-0.00276231	0.996242	-0.00543162	1.00188	0.00271671	55	0.234658	0.287607	0.541201	0.0420106	FALSE
YESphlox-Control	SPCC4B3.03c	1.0121	0.0173479	1.0172	0.0246025	1.01605	0.0229664	1.0218	0.0311148	55	0.0249581	0.0414236	1.38275	0.0381768	FALSE
YESphlox-Control	SPCC4B3.12	0.999359	-0.000925322	1.0044	0.0063292	0.997217	-0.00402009	1.00287	0.00412824	55	0.909007	0.930571	0.0312505	0.0406662	FALSE
YESphlox-Control	SPCC4G3.09c	1.02932	0.0416878	1.03451	0.0489423	1.02564	0.0365283	1.03145	0.0446766	55	1.16223e-05	3.26792e-05	4.48573	0.0446893	FALSE
YESphlox-Control	SPCC4G3.12c	0.992342	-0.0110911	0.997344	-0.00383659	0.994136	-0.00848518	0.999767	-0.000336847	51	0.0584088	0.0864823	1.06307	0.0271621	FALSE
YESphlox-Control	SPCC4G3.17	1.02977	0.042319	1.03496	0.0495735	1.02636	0.0375309	1.03217	0.0456792	55	2.70116e-07	9.78147e-07	6.0096	0.0372638	FALSE
YESphlox-Control	SPCC553.01c	1.00339	0.00488587	1.00845	0.0121404	1.01491	0.0213542	1.02066	0.0295025	55	0.72403	0.762305	0.117871	0.0706906	FALSE
YESphlox-Control	SPCC5E4.10c	0.991389	-0.0124761	0.996387	-0.0052216	0.993107	-0.00997865	0.998732	-0.00183032	55	0.0228053	0.0381152	1.4189	0.0260532	FALSE
YESphlox-Control	SPCC613.03	1.00788	0.0113293	1.01296	0.0185838	1.00439	0.00632481	1.01008	0.0144731	55	0.0450155	0.0698618	1.15576	0.0273348	FALSE
YESphlox-Control	SPCC622.11	1.00525	0.00754882	1.01031	0.0148033	1.01096	0.0157264	1.01669	0.0238747	51	0.271649	0.3279	0.484259	0.0328122	FALSE
YESphlox-Control	SPCC63.03	0.99297	-0.0101785	0.997975	-0.00292398	0.991047	-0.0129753	0.99666	-0.00482695	55	0.0311582	0.0493166	1.30701	0.0221071	FALSE
YESphlox-Control	SPCC63.06	0.872095	-0.197443	0.876491	-0.190189	0.885002	-0.176247	0.890015	-0.168098	55	7.69411e-20	1.67172e-18	17.7768	0.067799	TRUE
YESphlox-Control	SPCC663.06c	0.991578	-0.0122019	0.996577	-0.00494736	0.990043	-0.0144375	0.99565	-0.00628918	55	0.0273287	0.043836	1.35817	0.0263495	FALSE
YESphlox-Control	SPCC736.13	0.99422	-0.00836337	0.999232	-0.00110885	0.99514	-0.00702876	1.00078	0.00111958	54	0.08751	0.122309	0.912541	0.0229864	FALSE
YESphlox-Control	SPCC794.03	1.02183	0.0311509	1.02698	0.0384055	1.02365	0.0337219	1.02945	0.0418703	55	0.000508488	0.00121529	2.91532	0.0432948	FALSE
YESphlox-Control	SPCC962.05	1.03177	0.0451246	1.03697	0.0523791	1.02967	0.0421771	1.0355	0.0503254	55	2.28905e-12	1.88649e-11	10.7243	0.0261797	FALSE
YESphlox-Control	SPCC965.12	1.01	0.0143608	1.0151	0.0216154	1.00249	0.00358112	1.00816	0.0117295	55	0.0539507	0.0821288	1.0855	0.036869	FALSE
YESphlox-Control	SPCP31B10.02	1.00786	0.0112979	1.01294	0.0185524	1.00852	0.0122416	1.01423	0.02039	55	0.0115743	0.021279	1.67205	0.0208045	FALSE
EMM-Control	972	1	0	1.01233	0.0176737	1	0	1.00827	0.0118819	132	1	1	0	0.0665201	FALSE
EMM-Control	SPAC105.02c	0.996424	-0.00516812	1.00871	0.0125056	1.01296	0.0185825	1.02134	0.0304644	12	0.746324	0.872491	0.0592392	0.0325688	FALSE
EMM-Control	SPAC1071.07c	0.905138	-0.14379	0.916295	-0.126116	0.859141	-0.219033	0.866246	-0.207151	12	0.0448042	0.131398	0.881412	0.146272	FALSE
EMM-Control	SPAC1071.09c	1.00435	0.00626659	1.01673	0.0239403	1.01554	0.0222517	1.02394	0.0341336	12	0.821838	0.918657	0.0368467	0.0633675	FALSE
EMM-Control	SPAC10F6.14c	0.966007	-0.0498946	0.977914	-0.032221	0.972998	-0.0394913	0.981045	-0.0276094	12	0.0104646	0.0463155	1.33427	0.0367041	FALSE
EMM-Control	SPAC11E3.12	1.07849	0.109007	1.09178	0.126681	1.06833	0.0953538	1.07716	0.107236	12	0.0242616	0.0865451	1.06276	0.104699	FALSE
EMM-Control	SPAC12G12.11c	1.00786	0.0112949	1.02028	0.0289685	1.01094	0.0156993	1.0193	0.0275812	12	0.575723	0.781328	0.107167	0.0438782	FALSE
EMM-Control	SPAC13A11.06	1.02149	0.030669	1.03408	0.0483427	1.01996	0.0285172	1.0284	0.0403991	12	0.02286	0.0827808	1.08207	0.0241803	FALSE
EMM-Control	SPAC13F5.03c	0.947895	-0.0772003	0.959579	-0.0595267	0.951339	-0.0719686	0.959206	-0.0600868	12	0.0252492	0.0887434	1.05186	0.0693891	FALSE
EMM-Control	SPAC13F5.04c	0.984185	-0.0229989	0.996316	-0.00532524	0.989345	-0.015455	0.997526	-0.00357306	12	0.159728	0.323516	0.490104	0.03232	FALSE
EMM-Control	SPAC140.01	1.0176	0.0251695	1.03014	0.0428432	1.00777	0.0111689	1.01611	0.0230507	12	0.33569	0.538456	0.268849	0.0585168	FALSE
EMM-Control	SPAC1556.02c	0.988855	-0.0161694	1.00104	0.00150424	0.989866	-0.014695	0.998052	-0.00281314	12	0.376367	0.584102	0.233511	0.0381245	FALSE
EMM-Control	SPAC15A10.10	1.01173	0.0168173	1.0242	0.034491	1.01143	0.0163967	1.01979	0.0282786	12	0.323152	0.521847	0.282457	0.0352331	FALSE
EMM-Control	SPAC16.01	0.979044	-0.0305537	0.991112	-0.01288	0.991798	-0.0118819	1	0	12	0.0704718	0.187142	0.727829	0.0328735	FALSE
EMM-Control	SPAC1610.02c	0.953942	-0.0680266	0.9657	-0.0503529	0.940282	-0.0888342	0.948058	-0.0769523	12	0.168344	0.335285	0.474586	0.108188	FALSE
EMM-Control	SPAC1687.14c	1.00257	0.00370002	1.01493	0.0213737	1.01122	0.0161026	1.01959	0.0279845	12	0.844192	0.925514	0.0336172	0.0404234	FALSE
EMM-Control	SPAC1687.15	1.0126	0.0180656	1.02508	0.0357393	1.0057	0.00820524	1.01402	0.0200871	12	0.450419	0.664508	0.1775	0.0533002	FALSE
EMM-Control	SPAC16E8.01	0.9071	-0.140667	0.91828	-0.122993	0.884438	-0.177167	0.891752	-0.165285	12	0.00447025	0.0273946	1.56233	0.0913371	TRUE
EMM-Control	SPAC1705.02	1.05386	0.0756792	1.06685	0.0933528	1.06729	0.0939485	1.07611	0.10583	12	0.00151367	0.0116699	1.93293	0.0450416	TRUE
EMM-Control	SPAC17A2.02c	0.913879	-0.129925	0.925144	-0.112251	0.92988	-0.104884	0.93757	-0.093002	12	0.000532853	0.00637285	2.19567	0.0635393	TRUE
EMM-Control	SPAC17A5.16	1.00746	0.0107283	1.01988	0.0284019	1.01757	0.0251279	1.02599	0.0370098	12	0.57864	0.781328	0.107167	0.0416266	FALSE
EMM-Control	SPAC17H9.04c	0.870629	-0.199869	0.881361	-0.182196	0.874785	-0.193	0.882019	-0.181118	12	1.38315e-08	3.30572e-06	5.48073	0.0403465	TRUE
EMM-Control	SPAC17H9.06c	0.989447	-0.0153055	1.00164	0.00236814	0.998441	-0.00225063	1.0067	0.00963126	12	0.294636	0.485641	0.313684	0.028139	FALSE
EMM-Control	SPAC1805.07c	0.947038	-0.0785064	0.958711	-0.0608327	0.953	-0.0694515	0.960881	-0.0575696	12	0.0119072	0.0499265	1.30167	0.0607345	FALSE
EMM-Control	SPAC1834.04	1.03324	0.0471784	1.04598	0.0648521	1.03109	0.044166	1.03961	0.0560479	12	0.00909227	0.041001	1.38721	0.0348525	FALSE
EMM-Control	SPAC1834.09	0.992011	-0.0115721	1.00424	0.00610159	0.985152	-0.0215811	0.9933	-0.00969917	12	0.614066	0.796161	0.0989992	0.0505444	FALSE
EMM-Control	SPAC186.06	0.97683	-0.0338199	0.988871	-0.0161462	0.982252	-0.0258351	0.990375	-0.0139532	12	0.0174954	0.0696899	1.15683	0.0251926	FALSE
EMM-Control	SPAC18B11.04	1.02216	0.0316184	1.03476	0.049292	1.0169	0.0241799	1.02531	0.0360618	12	0.102395	0.237595	0.624162	0.0402986	FALSE
EMM-Control	SPAC19B12.07c	0.96868	-0.0459073	0.98062	-0.0282336	0.988373	-0.016872	0.996547	-0.00499013	12	0.096426	0.232786	0.633043	0.0581912	FALSE
EMM-Control	SPAC19G12.15c	0.897657	-0.155764	0.908721	-0.13809	0.924832	-0.112736	0.932481	-0.100854	12	0.00566698	0.0314979	1.50172	0.104553	TRUE
EMM-Control	SPAC1A6.04c	0.926089	-0.110778	0.937503	-0.0931041	0.928442	-0.107116	0.93612	-0.0952343	12	0.000606047	0.00658388	2.18152	0.0554578	TRUE
EMM-Control	SPAC1B9.02c	0.98032	-0.0286753	0.992403	-0.0110016	0.989024	-0.0159221	0.997203	-0.00404017	12	0.182969	0.35844	0.445584	0.0452915	FALSE
EMM-Control	SPAC1D4.03c	0.968291	-0.046487	0.980226	-0.0288133	0.969679	-0.0444205	0.977698	-0.0325386	12	0.0295325	0.100832	0.996401	0.0421378	FALSE
EMM-Control	SPAC1F3.09	1.02886	0.0410472	1.04154	0.0587209	1.0106	0.0152164	1.01896	0.0270983	12	0.302625	0.492022	0.308015	0.0918257	FALSE
EMM-Control	SPAC1F8.06	0.991442	-0.0124002	1.00366	0.00527352	1.01035	0.0148546	1.01871	0.0267365	12	0.730755	0.872491	0.0592392	0.0828594	FALSE
EMM-Control	SPAC20G4.05c	1.02646	0.0376839	1.03912	0.0553576	1.0387	0.0547764	1.04729	0.0666583	12	0.21323	0.392015	0.406698	0.068004	FALSE
EMM-Control	SPAC20H4.03c	0.982834	-0.0249801	0.994948	-0.0073064	0.988065	-0.0173224	0.996236	-0.00544048	12	0.263826	0.447194	0.349504	0.0478421	FALSE
EMM-Control	SPAC21E11.04	0.987752	-0.0177795	0.999927	-0.000105809	0.993293	-0.0097086	1.00151	0.00217329	12	0.375843	0.584102	0.233511	0.0427017	FALSE
EMM-Control	SPAC227.17c	0.944218	-0.0828088	0.955856	-0.0651351	0.958389	-0.0613166	0.966315	-0.0494347	12	0.0353729	0.109794	0.959422	0.0804001	FALSE
EMM-Control	SPAC22A12.06c	1.00225	0.00324634	1.01461	0.02092	1.02466	0.0351438	1.03313	0.0470256	12	0.927456	0.980805	0.00841726	0.0826136	FALSE
EMM-Control	SPAC22A12.14c	1.01148	0.0164694	1.02395	0.0341431	1.04502	0.0635307	1.05366	0.0754126	12	0.724164	0.869724	0.0606183	0.109563	FALSE
EMM-Control	SPAC22E12.14c	0.882787	-0.179862	0.893668	-0.162189	0.876636	-0.18995	0.883886	-0.178068	12	3.35877e-07	2.67582e-05	4.57254	0.0448096	TRUE
EMM-Control	SPAC22F3.04	0.987248	-0.0185158	0.999416	-0.000842082	1.0019	0.00273183	1.01018	0.0146137	12	0.502479	0.726198	0.138945	0.0617162	FALSE
EMM-Control	SPAC23A1.06c	0.979888	-0.0293106	0.991966	-0.0116369	0.990026	-0.0144619	0.998213	-0.00257997	12	0.234697	0.420321	0.376419	0.0531949	FALSE
EMM-Control	SPAC23C11.08	0.940044	-0.0891999	0.951631	-0.0715262	0.941283	-0.0872992	0.949068	-0.0754173	12	6.88496e-05	0.00149591	2.82509	0.0361333	TRUE
EMM-Control	SPAC23C4.09c	1.02083	0.0297412	1.03341	0.0474149	1.04543	0.0641004	1.05408	0.0759823	12	0.255201	0.435665	0.360848	0.0581581	FALSE
EMM-Control	SPAC23D3.03c	1.05839	0.0818681	1.07143	0.0995418	1.04453	0.0628535	1.05317	0.0747354	12	0.031716	0.103837	0.983646	0.082146	FALSE
EMM-Control	SPAC23D3.04c	0.93146	-0.102434	0.942941	-0.0847604	0.926935	-0.109459	0.934601	-0.0975776	12	0.00250355	0.0181318	1.74156	0.0616712	TRUE
EMM-Control	SPAC23G3.05c	0.934029	-0.0984601	0.945542	-0.0807864	0.953731	-0.068345	0.961619	-0.0564632	12	0.0115214	0.0491718	1.30828	0.075707	FALSE
EMM-Control	SPAC23H4.09	1.03699	0.0524078	1.04978	0.0700815	1.03357	0.0476382	1.04212	0.0595201	12	0.00033045	0.00464574	2.33295	0.0247852	FALSE
EMM-Control	SPAC24H6.04	1.02087	0.029799	1.03345	0.0474727	0.998219	-0.00257243	1.00647	0.00930946	12	0.54953	0.767775	0.114766	0.117041	FALSE
EMM-Control	SPAC25A8.03c	1.0026	0.00374491	1.01496	0.0214186	1.00497	0.0071538	1.01328	0.0190357	12	0.864614	0.935035	0.0291722	0.0485723	FALSE
EMM-Control	SPAC25B8.08	0.997899	-0.00303458	1.0102	0.0146391	0.990743	-0.0134172	0.998936	-0.00153534	12	0.880545	0.947974	0.0232037	0.0438902	FALSE
EMM-Control	SPAC26F1.10c	0.81177	-0.300858	0.821775	-0.283184	0.822108	-0.2826	0.828907	-0.270718	12	6.47003e-08	7.73169e-06	5.11173	0.0594998	TRUE
EMM-Control	SPAC26F1.12c	0.989608	-0.0150709	1.00181	0.00260282	0.990905	-0.0131813	0.9991	-0.00129941	12	0.194228	0.367327	0.434947	0.0190297	FALSE
EMM-Control	SPAC27E2.03c	0.971239	-0.0421025	0.98321	-0.0244288	0.970791	-0.0427678	0.978819	-0.0308859	12	0.138662	0.29011	0.537438	0.0608682	FALSE
EMM-Control	SPAC29A4.20	0.951844	-0.0712023	0.963577	-0.0535286	0.951798	-0.071272	0.95967	-0.0593901	11	0.00721504	0.0359249	1.4446	0.0474264	TRUE
EMM-Control	SPAC2F3.18c	1.0222	0.0316761	1.0348	0.0493498	1.0267	0.0380085	1.03519	0.0498904	12	0.11189	0.248681	0.604357	0.0418009	FALSE
EMM-Control	SPAC32A11.03c	1.00644	0.00926322	1.01885	0.0269369	1.00841	0.0120823	1.01675	0.0239642	12	0.422167	0.630612	0.200238	0.0193571	FALSE
EMM-Control	SPAC3A11.02	0.952122	-0.0707819	0.963857	-0.0531083	0.95659	-0.0640269	0.964501	-0.052145	12	0.00509523	0.0289943	1.53769	0.0473121	FALSE
EMM-Control	SPAC3A11.10c	0.960588	-0.0580096	0.972429	-0.0403359	0.993744	-0.00905381	1.00196	0.00282808	12	0.0680152	0.184589	0.733794	0.0665236	FALSE
EMM-Control	SPAC3A11.11c	1.01687	0.024133	1.0294	0.0418066	1.00172	0.00247294	1.01	0.0143548	12	0.248565	0.430485	0.366042	0.0451091	FALSE
EMM-Control	SPAC3A12.03c	1.02958	0.0420514	1.04227	0.0597251	1.03791	0.053679	1.04649	0.0655609	12	0.00300662	0.0201542	1.69563	0.0249442	FALSE
EMM-Control	SPAC3A12.13c	0.971105	-0.0423006	0.983075	-0.0246269	0.981558	-0.0268545	0.989675	-0.0149726	12	0.0633479	0.174025	0.759389	0.0465072	FALSE
EMM-Control	SPAC3G6.03c	0.96898	-0.0454606	0.980924	-0.0277869	0.983019	-0.0247086	0.991149	-0.0128267	12	0.000544554	0.00637285	2.19567	0.0207157	FALSE
EMM-Control	SPAC3G6.05	0.983811	-0.0235462	0.995938	-0.00587254	0.990111	-0.0143384	0.998299	-0.00245655	12	0.139592	0.29011	0.537438	0.0311165	FALSE
EMM-Control	SPAC3G9.11c	1.00383	0.00551045	1.0162	0.0231841	1.00458	0.00659414	1.01289	0.018476	12	0.69587	0.84963	0.0707702	0.0273826	FALSE
EMM-Control	SPAC3H1.03	1.05025	0.0707387	1.0632	0.0884124	1.03552	0.0503601	1.04409	0.062242	12	0.0747565	0.190637	0.719793	0.0881782	FALSE
EMM-Control	SPAC3H1.08c	0.925751	-0.111305	0.937161	-0.0936309	0.931459	-0.102436	0.939162	-0.0905543	12	2.13081e-05	0.000636581	3.19615	0.0402223	TRUE
EMM-Control	SPAC3H1.11	0.964311	-0.0524292	0.976197	-0.0347555	0.98803	-0.0173729	0.996201	-0.00549103	12	0.0300944	0.101304	0.994375	0.0482782	FALSE
EMM-Control	SPAC3H5.08c	0.951049	-0.0724087	0.962771	-0.054735	0.966453	-0.049229	0.974445	-0.0373471	12	0.000136888	0.00228989	2.64019	0.031245	FALSE
EMM-Control	SPAC3H5.09c	1.00036	0.000520329	1.01269	0.018194	0.997764	-0.00322957	1.00602	0.00865232	12	0.97816	0.997073	0.00127303	0.0408736	FALSE
EMM-Control	SPAC3H5.10	0.902471	-0.148047	0.913595	-0.130374	0.882776	-0.179881	0.890076	-0.167999	12	0.00303578	0.0201542	1.69563	0.0904337	TRUE
EMM-Control	SPAC3H8.03	0.936122	-0.0952308	0.947661	-0.0775571	0.939596	-0.0898876	0.947366	-0.0780057	12	6.76087e-07	4.03962e-05	4.39366	0.0275625	TRUE
EMM-Control	SPAC3H8.04	0.995095	-0.00709334	1.00736	0.0105803	0.993129	-0.00994669	1.00134	0.0019352	12	0.65923	0.8249	0.0835988	0.0327911	FALSE
EMM-Control	SPAC4G9.11c	0.997817	-0.00315252	1.01012	0.0145212	0.996731	-0.0047245	1.00497	0.00715739	12	0.812446	0.915918	0.0381435	0.0248924	FALSE
EMM-Control	SPAC4G9.14	1.01406	0.0201398	1.02656	0.0378135	1.01763	0.0252112	1.02604	0.0370931	12	0.108717	0.245127	0.610609	0.0222216	FALSE
EMM-Control	SPAC4H3.04c	1.0688	0.0959984	1.08198	0.113672	1.07795	0.108296	1.08687	0.120178	12	0.00108031	0.00993055	2.00303	0.0553738	TRUE
EMM-Control	SPAC4H3.06	1.03845	0.0544289	1.05125	0.0721025	1.04524	0.0638318	1.05388	0.0757137	12	0.00471982	0.0282009	1.54974	0.0368413	FALSE
EMM-Control	SPAC4H3.07c	0.923966	-0.114089	0.935354	-0.0964151	0.922243	-0.116782	0.92987	-0.1049	12	0.0192219	0.0729213	1.13715	0.0965634	FALSE
EMM-Control	SPAC521.03	0.996859	-0.00453932	1.00915	0.0131344	1.00571	0.00821572	1.01403	0.0200976	12	0.803294	0.914225	0.0389469	0.0386737	FALSE
EMM-Control	SPAC56F8.02	1.00029	0.000416978	1.01262	0.0180907	1.02487	0.0354359	1.03334	0.0473178	12	0.988729	0.997073	0.00127303	0.0674798	FALSE
EMM-Control	SPAC57A7.09	1.01263	0.0181007	1.02511	0.0357744	1.01585	0.0226871	1.02425	0.034569	12	0.136178	0.288023	0.540572	0.0210464	FALSE
EMM-Control	SPAC589.07c	0.981193	-0.0273911	0.993287	-0.00971742	0.979323	-0.0301433	0.987422	-0.0182615	12	0.142744	0.294102	0.531503	0.0380516	FALSE
EMM-Control	SPAC5H10.06c	1.00537	0.00773212	1.01777	0.0254058	1.01691	0.024188	1.02532	0.0360699	11	0.515436	0.733268	0.134737	0.0196373	FALSE
EMM-Control	SPAC637.07	0.977607	-0.0326738	0.989657	-0.0150001	0.982404	-0.0256123	0.990528	-0.0137304	12	0.271844	0.45754	0.339571	0.0654644	FALSE
EMM-Control	SPAC652.01	0.955844	-0.0651529	0.967626	-0.0474792	0.985849	-0.0205608	0.994002	-0.00867889	12	0.112375	0.248681	0.604357	0.0882312	FALSE
EMM-Control	SPAC683.02c	0.998442	-0.00224942	1.01075	0.0154243	1.00313	0.00451056	1.01143	0.0163925	12	0.831436	0.918657	0.0368467	0.0158408	FALSE
EMM-Control	SPAC688.03c	1.01619	0.0231692	1.02871	0.0408429	1.02809	0.0399664	1.03659	0.0518483	12	0.24629	0.430485	0.366042	0.0427352	FALSE
EMM-Control	SPAC688.13	1.00038	0.000549763	1.01271	0.0182234	1.00498	0.00717317	1.0133	0.0190551	12	0.973329	0.997073	0.00127303	0.0340001	FALSE
EMM-Control	SPAC694.02	0.931012	-0.103128	0.942488	-0.0854541	0.950908	-0.0726218	0.958772	-0.0607399	12	0.00641104	0.0340497	1.46789	0.0716075	TRUE
EMM-Control	SPAC694.04c	1.02193	0.0313017	1.03453	0.0489754	1.02313	0.0329921	1.03159	0.044874	12	0.123639	0.269356	0.569674	0.0429133	FALSE
EMM-Control	SPAC694.06c	0.985056	-0.0217229	0.997197	-0.00404917	0.991798	-0.0118819	1	0	12	0.255031	0.435665	0.360848	0.0397338	FALSE
EMM-Control	SPAC6F12.02	0.978354	-0.0315719	0.990413	-0.0138983	0.967613	-0.0474984	0.975615	-0.0356165	12	0.381405	0.588102	0.230547	0.0811944	FALSE
EMM-Control	SPAC6F6.13c	0.990163	-0.014262	1.00237	0.00341169	0.984774	-0.0221347	0.992918	-0.0102528	12	0.617252	0.796161	0.0989992	0.0643537	FALSE
EMM-Control	SPAC6G10.10c	0.972497	-0.040235	0.984483	-0.0225613	0.983796	-0.0235693	0.991932	-0.0116874	12	0.0405794	0.121231	0.916386	0.0387473	FALSE
EMM-Control	SPAC7D4.05	1.0131	0.0187702	1.02558	0.0364439	1.02135	0.030471	1.02979	0.0423529	12	0.18811	0.362567	0.440612	0.0273928	FALSE
EMM-Control	SPAC806.04c	0.986071	-0.0202366	0.998225	-0.00256289	0.993418	-0.00952677	1.00163	0.00235512	12	0.399359	0.607942	0.216138	0.0525453	FALSE
EMM-Control	SPAC806.07	0.995312	-0.00677881	1.00758	0.0108949	0.990537	-0.0137167	0.998729	-0.00183481	12	0.738069	0.872491	0.0592392	0.0439487	FALSE
EMM-Control	SPAC821.05	0.920365	-0.119722	0.931709	-0.102048	0.91546	-0.127431	0.923031	-0.115549	12	0.00433436	0.0272608	1.56446	0.077828	TRUE
EMM-Control	SPAC821.07c	1.10373	0.142384	1.11733	0.160057	1.10624	0.145659	1.11538	0.15754	12	0.00122714	0.0108624	1.96407	0.0847544	TRUE
EMM-Control	SPAC823.09c	1.00374	0.00539163	1.01612	0.0230653	1.00919	0.0132013	1.01754	0.0250832	12	0.658808	0.8249	0.0835988	0.0216173	FALSE
EMM-Control	SPAC823.16c	1.02673	0.0380547	1.03938	0.0557284	1.01769	0.0253011	1.02611	0.037183	12	0.0395731	0.119721	0.921829	0.0372126	FALSE
EMM-Control	SPAC890.03	1.01946	0.0278028	1.03202	0.0454765	1.02488	0.0354521	1.03335	0.047334	12	0.0982253	0.234758	0.629379	0.0338323	FALSE
EMM-Control	SPAC8C9.06c	0.547783	-0.868325	0.554535	-0.850651	0.482287	-1.05204	0.486276	-1.04015	11	5.72616e-05	0.00136855	2.86374	0.229416	TRUE
EMM-Control	SPAC8C9.16c	0.977966	-0.0321439	0.99002	-0.0144702	0.986195	-0.0200549	0.994351	-0.00817303	12	0.0884097	0.220103	0.657373	0.0379004	FALSE
EMM-Control	SPAC8F11.03	1.00689	0.00990052	1.0193	0.0275742	1.00371	0.0053355	1.01201	0.0172174	12	0.50649	0.726198	0.138945	0.0296325	FALSE
EMM-Control	SPAC977.15	1.0025	0.00360562	1.01486	0.0212793	0.993125	-0.00995247	1.00134	0.00192942	12	0.834094	0.918657	0.0368467	0.0361194	FALSE
EMM-Control	SPACUNK4.13c	1.01908	0.027264	1.03164	0.0449377	1.0176	0.0251731	1.02602	0.037055	12	0.0228431	0.0827808	1.08207	0.0199474	FALSE
EMM-Control	SPACUNK4.16c	0.960025	-0.0588558	0.971858	-0.0411821	0.986403	-0.0197508	0.994561	-0.00786891	12	0.0542594	0.154381	0.811407	0.0633139	FALSE
EMM-Control	SPACUNK4.17	1.0124	0.017775	1.02488	0.0354487	1.00896	0.0128761	1.01731	0.024758	12	0.290325	0.481859	0.31708	0.0346014	FALSE
EMM-Control	SPAP14E8.05c	1.02137	0.0305029	1.03396	0.0481766	1.00697	0.0100194	1.0153	0.0219013	12	0.350882	0.555369	0.255418	0.0747115	FALSE
EMM-Control	SPAP27G11.12	0.986753	-0.0192392	0.998915	-0.00156552	0.964885	-0.0515704	0.972865	-0.0396885	12	0.609526	0.796161	0.0989992	0.0863228	FALSE
EMM-Control	SPAP8A3.04c	0.998647	-0.0019534	1.01096	0.0157203	1.00844	0.0121205	1.01678	0.0240024	12	0.922719	0.980133	0.00871501	0.0437737	FALSE
EMM-Control	SPAPB1A11.02	0.96923	-0.0450884	0.981177	-0.0274147	1.0256	0.036471	1.03408	0.0483528	12	0.603186	0.796161	0.0989992	0.200742	FALSE
EMM-Control	SPAPB1E7.11c	0.976098	-0.0349027	0.988129	-0.0172291	1.04982	0.0701364	1.0585	0.0820183	12	0.781445	0.897911	0.0467668	0.294195	FALSE
EMM-Control	SPAPB24D3.08c	1.00413	0.00594005	1.0165	0.0236137	1.00566	0.00814187	1.01398	0.0200238	12	0.641157	0.815088	0.0887954	0.0233046	FALSE
EMM-Control	SPAPB2B4.07	1.00656	0.0094382	1.01897	0.0271119	1.01515	0.0216899	1.02354	0.0335718	12	0.741791	0.872491	0.0592392	0.0653916	FALSE
EMM-Control	SPBC106.10	0.952246	-0.0705945	0.963983	-0.0529208	0.958016	-0.0618779	0.965939	-0.049996	12	0.00623683	0.0338773	1.47009	0.0487304	FALSE
EMM-Control	SPBC1105.05	0.92177	-0.117522	0.933131	-0.0998484	0.88718	-0.172701	0.894517	-0.160819	12	0.0293187	0.100832	0.996401	0.108786	FALSE
EMM-Control	SPBC1105.14	1.1691	0.225403	1.18351	0.243077	1.18088	0.239865	1.19065	0.251747	12	0.000388292	0.00515565	2.28772	0.118884	TRUE
EMM-Control	SPBC119.03	1.01733	0.0247873	1.02987	0.042461	1.01548	0.0221613	1.02388	0.0340432	12	0.215263	0.392731	0.405905	0.0426566	FALSE
EMM-Control	SPBC119.16c	0.980078	-0.0290319	0.992158	-0.0113582	0.97199	-0.0409871	0.980028	-0.0291052	12	0.19486	0.367327	0.434947	0.0474584	FALSE
EMM-Control	SPBC1198.07c	1.03522	0.0499395	1.04798	0.0676132	1.01428	0.0204591	1.02267	0.032341	12	0.187421	0.362567	0.440612	0.0861445	FALSE
EMM-Control	SPBC1198.11c	0.866406	-0.206886	0.877085	-0.189212	0.839459	-0.252468	0.846401	-0.240587	12	0.000197871	0.0029557	2.52934	0.0871664	TRUE
EMM-Control	SPBC1198.14c	1.02966	0.0421657	1.04235	0.0598394	1.02991	0.0425153	1.03843	0.0543972	12	0.0498221	0.143464	0.843258	0.0446794	FALSE
EMM-Control	SPBC11B10.10c	0.893568	-0.162351	0.904582	-0.144678	0.887478	-0.172217	0.894817	-0.160335	12	0.00149093	0.0116699	1.93293	0.0892469	TRUE
EMM-Control	SPBC14C8.15	0.958747	-0.0607773	0.970565	-0.0431036	0.947837	-0.0772888	0.955676	-0.0654069	12	0.0630551	0.174025	0.759389	0.0682772	FALSE
EMM-Control	SPBC14C8.16c	1.00387	0.00557127	1.01624	0.0232449	1.00297	0.00427727	1.01126	0.0161592	12	0.886681	0.9503	0.0221393	0.0910441	FALSE
EMM-Control	SPBC14F5.10c	1.04077	0.0576478	1.0536	0.0753215	1.05212	0.0733036	1.06082	0.0851855	12	0.00411879	0.0266052	1.57503	0.0384989	TRUE
EMM-Control	SPBC1539.02	0.989152	-0.015736	1.00134	0.00193764	0.996299	-0.00534884	1.00454	0.00653305	12	0.374853	0.584102	0.233511	0.0367067	FALSE
EMM-Control	SPBC15C4.06c	0.983096	-0.0245956	0.995214	-0.00692193	0.999051	-0.00136935	1.00731	0.0105125	12	0.409762	0.615932	0.210467	0.0666558	FALSE
EMM-Control	SPBC15D4.05	0.993091	-0.0100017	1.00533	0.00767193	0.993521	-0.00937783	1.00174	0.00250406	12	0.567622	0.779665	0.108092	0.0364819	FALSE
EMM-Control	SPBC1604.16c	1.0067	0.00963839	1.01911	0.0273121	1.01431	0.0204958	1.0227	0.0323777	12	0.539727	0.758792	0.119877	0.0319339	FALSE
EMM-Control	SPBC16A3.02c	0.997099	-0.00419103	1.00939	0.0134826	1.01818	0.0259946	1.0266	0.0378765	12	0.903574	0.964081	0.0158863	0.0797901	FALSE
EMM-Control	SPBC16A3.08c	0.834505	-0.261008	0.844791	-0.243334	0.829862	-0.269056	0.836725	-0.257174	12	2.65701e-05	0.000705583	3.15145	0.0868114	TRUE
EMM-Control	SPBC16C6.01c	1.04316	0.0609609	1.05602	0.0786345	1.05855	0.0820906	1.0673	0.0939724	12	0.00896204	0.041001	1.38721	0.0465051	TRUE
EMM-Control	SPBC16D10.08c	0.937022	-0.0938457	0.948571	-0.0761721	0.922123	-0.116968	0.929749	-0.105087	12	0.0149324	0.0604888	1.21832	0.0757876	FALSE
EMM-Control	SPBC16E9.13	0.992347	-0.0110841	1.00458	0.00658959	0.990867	-0.0132362	0.999062	-0.00135435	12	0.610508	0.796161	0.0989992	0.0475519	FALSE
EMM-Control	SPBC16E9.16c	1.02135	0.0304752	1.03394	0.0481489	1.02234	0.0318715	1.03079	0.0437533	12	0.0589686	0.165806	0.780401	0.0317091	FALSE
EMM-Control	SPBC16H5.13	1.0283	0.0402586	1.04097	0.0579322	1.03492	0.0495243	1.04348	0.0614062	12	0.0832784	0.209511	0.678793	0.0495415	FALSE
EMM-Control	SPBC16H5.14c	1.03786	0.0536057	1.05065	0.0712793	1.04611	0.0650305	1.05476	0.0769124	12	0.0327087	0.104232	0.982001	0.0524963	FALSE
EMM-Control	SPBC1709.09	0.947785	-0.0773683	0.959467	-0.0596947	0.96414	-0.052685	0.972114	-0.0408031	12	0.00700321	0.0359249	1.4446	0.054548	FALSE
EMM-Control	SPBC1778.07	1.02607	0.0371285	1.03872	0.0548022	1.0125	0.0179166	1.02087	0.0297985	12	0.123971	0.269356	0.569674	0.0522524	FALSE
EMM-Control	SPBC17G9.07	0.834984	-0.26018	0.845276	-0.242506	0.88723	-0.17262	0.894567	-0.160739	12	0.00011917	0.00219089	2.65938	0.101229	TRUE
EMM-Control	SPBC17G9.09	1.00667	0.00958749	1.01908	0.0272612	1.00817	0.0117392	1.01651	0.0236211	12	0.552541	0.767775	0.114766	0.0331131	FALSE
EMM-Control	SPBC1861.02	1.02556	0.036418	1.03821	0.0540917	1.02426	0.0345813	1.03273	0.0464632	12	0.241192	0.426999	0.369573	0.0701524	FALSE
EMM-Control	SPBC18A7.01	0.998326	-0.00241676	1.01063	0.0152569	1.00746	0.0107273	1.01579	0.0226092	12	0.864556	0.935035	0.0291722	0.0275286	FALSE
EMM-Control	SPBC18E5.10	0.938627	-0.0913761	0.950196	-0.0737024	0.954268	-0.0675342	0.962159	-0.0556524	11	0.00721473	0.0359249	1.4446	0.0609144	FALSE
EMM-Control	SPBC18H10.02	0.833747	-0.262319	0.844024	-0.244645	0.776511	-0.364922	0.782933	-0.35304	12	0.0111312	0.0483701	1.31542	0.191179	TRUE
EMM-Control	SPBC18H10.04c	1.11466	0.156599	1.1284	0.174273	1.13385	0.181235	1.14323	0.193117	12	0.000143717	0.00228989	2.64019	0.0725632	TRUE
EMM-Control	SPBC18H10.05	1.01235	0.017704	1.02483	0.0353777	1.00572	0.00822217	1.01403	0.0201041	12	0.349422	0.555369	0.255418	0.0402847	FALSE
EMM-Control	SPBC19C7.01	1.01393	0.0199601	1.02643	0.0376338	1.00821	0.0117951	1.01655	0.023677	12	0.178865	0.353294	0.451863	0.0290019	FALSE
EMM-Control	SPBC1D7.03	0.878568	-0.186774	0.889397	-0.169101	0.877656	-0.188272	0.884915	-0.17639	12	5.78991e-06	0.000276758	3.5579	0.056763	TRUE
EMM-Control	SPBC20F10.02c	1.00605	0.00870613	1.01845	0.0263798	0.996762	-0.00467919	1.00501	0.0072027	12	0.827228	0.918657	0.0368467	0.0930224	FALSE
EMM-Control	SPBC20F10.03	0.988277	-0.017013	1.00046	0.000660648	0.991798	-0.0118819	1	0	12	0.135992	0.288023	0.540572	0.0182401	FALSE
EMM-Control	SPBC21.03c	0.959303	-0.0599408	0.971128	-0.0422672	0.966871	-0.0486043	0.974867	-0.0367224	12	0.000856029	0.00852463	2.06932	0.0310374	FALSE
EMM-Control	SPBC215.05	0.975257	-0.036145	0.987278	-0.0184713	0.969529	-0.0446439	0.977547	-0.032762	12	0.0749785	0.190637	0.719793	0.0410717	FALSE
EMM-Control	SPBC215.06c	0.996636	-0.00486149	1.00892	0.0128122	0.997988	-0.00290596	1.00624	0.00897593	11	0.718712	0.867536	0.0617124	0.0243534	FALSE
EMM-Control	SPBC21C3.03	0.97066	-0.042962	0.982624	-0.0252883	0.979341	-0.0301171	0.98744	-0.0182352	12	0.0345438	0.108631	0.964046	0.0400649	FALSE
EMM-Control	SPBC21C3.08c	0.990211	-0.0141923	1.00242	0.00348142	0.98438	-0.0227131	0.992521	-0.0108312	12	0.287506	0.480517	0.318291	0.0245387	FALSE
EMM-Control	SPBC21C3.14c	1.01973	0.0281848	1.0323	0.0458585	1.02214	0.0315877	1.03059	0.0434696	12	0.036908	0.11309	0.946576	0.0244909	FALSE
EMM-Control	SPBC21C3.18	1.02514	0.0358143	1.03777	0.053488	1.02922	0.0415464	1.03773	0.0534283	12	0.0450821	0.131398	0.881412	0.0358313	FALSE
EMM-Control	SPBC25B2.04c	0.869406	-0.201898	0.880122	-0.184225	0.856825	-0.222928	0.86391	-0.211046	12	1.37246e-05	0.000468597	3.3292	0.0653024	TRUE
EMM-Control	SPBC25H2.14	1.04544	0.0641071	1.05832	0.0817808	1.07238	0.100817	1.08125	0.112699	12	0.19519	0.367327	0.434947	0.114213	FALSE
EMM-Control	SPBC28F2.03	1.01708	0.0244261	1.02961	0.0420998	1.01988	0.0283941	1.02831	0.040276	12	0.106056	0.243725	0.6131	0.0294203	FALSE
EMM-Control	SPBC2D10.03c	1.01942	0.0277434	1.03198	0.0454171	0.997611	-0.00345084	1.00586	0.00843105	12	0.494441	0.720558	0.142331	0.0945183	FALSE
EMM-Control	SPBC2D10.05	0.989587	-0.0151009	1.00178	0.00257274	1.00375	0.00539973	1.01205	0.0172816	12	0.394211	0.603951	0.218998	0.036735	FALSE
EMM-Control	SPBC2G2.06c	0.997348	-0.00383177	1.00964	0.0138419	0.995617	-0.00633709	1.00385	0.0055448	11	0.769331	0.888261	0.0514594	0.0231404	FALSE
EMM-Control	SPBC30D10.10c	0.934472	-0.0977772	0.94599	-0.0801035	0.938711	-0.0912474	0.946474	-0.0793655	12	0.00505758	0.0289943	1.53769	0.0654117	TRUE
EMM-Control	SPBC30D10.13c	0.631296	-0.663611	0.639078	-0.645937	0.635914	-0.653096	0.641173	-0.641214	12	1.02829e-05	0.0004096	3.38764	0.171276	TRUE
EMM-Control	SPBC31E1.01c	1.04023	0.0569006	1.05305	0.0745743	1.01314	0.018833	1.02152	0.0307149	12	0.153836	0.314247	0.502729	0.0905286	FALSE
EMM-Control	SPBC32F12.03c	0.993316	-0.00967476	1.00556	0.00799892	0.980936	-0.027769	0.989048	-0.0158871	12	0.735595	0.872491	0.0592392	0.0649254	FALSE
EMM-Control	SPBC32H8.03	1.00709	0.0101897	1.0195	0.0278634	1.00111	0.00160429	1.00939	0.0134862	12	0.607067	0.796161	0.0989992	0.0429453	FALSE
EMM-Control	SPBC36.07	0.976245	-0.0346849	0.988278	-0.0170113	0.970075	-0.0438324	0.978097	-0.0319505	12	0.434554	0.645083	0.190384	0.101032	FALSE
EMM-Control	SPBC365.12c	1.03418	0.0484905	1.04693	0.0661642	1.04234	0.059824	1.05096	0.0717059	12	0.0137426	0.0566289	1.24696	0.0389124	FALSE
EMM-Control	SPBC365.20c	0.999932	-9.76874e-05	1.01226	0.017576	1.00228	0.00329211	1.01057	0.015174	12	0.995851	1	0	0.0402757	FALSE
EMM-Control	SPBC3B8.02	0.934907	-0.0971052	0.946431	-0.0794315	0.943413	-0.084038	0.951215	-0.0721561	12	0.00851587	0.0399077	1.39894	0.07078	TRUE
EMM-Control	SPBC3B8.08	0.995175	-0.00697839	1.00744	0.0106953	0.999011	-0.00142811	1.00727	0.0104538	12	0.574938	0.781328	0.107167	0.022158	FALSE
EMM-Control	SPBC3E7.07c	1.00287	0.00413138	1.01523	0.0218051	0.996525	-0.0050228	1.00477	0.00685909	12	0.755169	0.876142	0.0574253	0.0248649	FALSE
EMM-Control	SPBC3H7.03c	0.927438	-0.108678	0.938869	-0.091004	0.919932	-0.120401	0.927539	-0.10852	12	0.00102392	0.0097887	2.00927	0.0580142	TRUE
EMM-Control	SPBC3H7.10	0.932221	-0.101255	0.943712	-0.0835817	0.936997	-0.0938844	0.944745	-0.0820025	12	0.00145482	0.0116699	1.93293	0.0566557	TRUE
EMM-Control	SPBC409.07c	0.937635	-0.0929011	0.949192	-0.0752274	0.957734	-0.0623037	0.965654	-0.0504218	12	0.0211719	0.0790639	1.10202	0.0804595	FALSE
EMM-Control	SPBC428.08c	1.01658	0.0237177	1.02911	0.0413914	0.999637	-0.000524402	1.0079	0.0113575	12	0.507427	0.726198	0.138945	0.0827486	FALSE
EMM-Control	SPBC428.15	0.999807	-0.000278695	1.01213	0.017395	1.00582	0.00836637	1.01413	0.0202483	12	0.988109	0.997073	0.00127303	0.0400502	FALSE
EMM-Control	SPBC4F6.08c	0.903908	-0.145752	0.91505	-0.128078	0.920803	-0.119035	0.928418	-0.107153	12	8.50425e-05	0.00169376	2.77115	0.0580464	TRUE
EMM-Control	SPBC543.07	1.04741	0.0668255	1.06032	0.0844992	1.0626	0.0876022	1.07139	0.099484	12	0.101872	0.237595	0.624162	0.0917385	FALSE
EMM-Control	SPBC646.09c	1.00438	0.00630451	1.01676	0.0239782	1.02221	0.0316956	1.03067	0.0435775	12	0.809287	0.915918	0.0381435	0.0591034	FALSE
EMM-Control	SPBC646.13	0.980414	-0.0285367	0.992499	-0.010863	0.985404	-0.0212125	0.993553	-0.00933058	12	0.0718976	0.18883	0.723929	0.030323	FALSE
EMM-Control	SPBC649.04	1.00728	0.0104591	1.01969	0.0281328	1.00142	0.00205259	1.00971	0.0139345	12	0.522723	0.739235	0.131217	0.0337022	FALSE
EMM-Control	SPBC660.10	0.930491	-0.103935	0.94196	-0.0862616	0.929728	-0.10512	0.937417	-0.0932378	12	0.000723206	0.00751505	2.12407	0.0532678	TRUE
EMM-Control	SPBC685.04c	0.967617	-0.047492	0.979544	-0.0298183	0.9676	-0.0475178	0.975602	-0.0356359	12	0.00237784	0.0177595	1.75057	0.0270772	FALSE
EMM-Control	SPBC691.03c	0.934391	-0.0979021	0.945908	-0.0802284	0.954098	-0.0677914	0.961988	-0.0559095	12	0.0321862	0.103953	0.983165	0.092894	FALSE
EMM-Control	SPBC725.11c	0.95858	-0.0610291	0.970395	-0.0433554	0.962032	-0.0558434	0.969988	-0.0439615	11	0.000559958	0.00637285	2.19567	0.028329	FALSE
EMM-Control	SPBC776.01	0.987782	-0.017735	0.999957	-6.13524e-05	0.99521	-0.00692754	1.00344	0.00495435	12	0.202548	0.378196	0.422283	0.0259679	FALSE
EMM-Control	SPBC947.05c	1.01144	0.0164065	1.0239	0.0340802	1.01079	0.0154901	1.01915	0.027372	12	0.478938	0.702247	0.15351	0.0514201	FALSE
EMM-Control	SPBC947.09	1.01012	0.0145238	1.02257	0.0321975	1.022	0.0313915	1.03045	0.0432734	12	0.710251	0.861675	0.0646566	0.0910941	FALSE
EMM-Control	SPBC9B6.03	0.981609	-0.0267798	0.993708	-0.00910608	0.988341	-0.0169194	0.996514	-0.00503751	12	0.16505	0.331488	0.479533	0.0397046	FALSE
EMM-Control	SPBP22H7.04	0.994469	-0.0080015	1.00673	0.00967217	0.99363	-0.00921913	1.00185	0.00266276	12	0.612843	0.796161	0.0989992	0.0319938	FALSE
EMM-Control	SPBP35G2.11c	0.996239	-0.00543683	1.00852	0.0122369	0.994684	-0.0076895	1.00291	0.00419239	12	0.677132	0.842888	0.0742301	0.0241245	FALSE
EMM-Control	SPBP8B7.27	0.999715	-0.000411662	1.01204	0.017262	1.00432	0.00622472	1.01263	0.0181066	12	0.980812	0.997073	0.00127303	0.0358175	FALSE
EMM-Control	SPBP8B7.31	1.00803	0.0115388	1.02045	0.0292124	1.01833	0.0262091	1.02675	0.038091	12	0.614078	0.796161	0.0989992	0.0508431	FALSE
EMM-Control	SPBPB21E7.04c	1.02897	0.0412016	1.04165	0.0588753	1.02862	0.0407143	1.03713	0.0525962	12	0.0898489	0.22138	0.654861	0.052163	FALSE
EMM-Control	SPBPJ4664.05	0.980595	-0.0282709	0.992681	-0.0105973	0.982551	-0.0253959	0.990677	-0.013514	12	0.00836534	0.0399077	1.39894	0.0150018	FALSE
EMM-Control	SPCC1020.08	0.994175	-0.00842766	1.00643	0.00924602	0.995248	-0.00687249	1.00348	0.0050094	12	0.619606	0.796161	0.0989992	0.035162	FALSE
EMM-Control	SPCC1235.03	1.00144	0.00207587	1.01378	0.0197495	0.994782	-0.00754805	1.00301	0.00433384	12	0.860887	0.935035	0.0291722	0.0204249	FALSE
EMM-Control	SPCC1259.02c	0.999522	-0.000689952	1.01184	0.0169837	1.00182	0.00262912	1.01011	0.014511	12	0.972018	0.997073	0.00127303	0.0425868	FALSE
EMM-Control	SPCC126.12	1.00073	0.00105317	1.01307	0.0187268	1.01285	0.018422	1.02123	0.0303038	12	0.941566	0.987206	0.00559236	0.0281687	FALSE
EMM-Control	SPCC1393.13	0.980835	-0.0279181	0.992924	-0.0102444	0.942976	-0.0847068	0.950774	-0.0728249	12	0.633175	0.809245	0.0919199	0.135611	FALSE
EMM-Control	SPCC13B11.01	0.998746	-0.00180973	1.01106	0.0158639	0.985267	-0.0214139	0.993415	-0.00953205	12	0.948034	0.987206	0.00559236	0.0630815	FALSE
EMM-Control	SPCC1494.08c	0.961829	-0.0561471	0.973685	-0.0384734	0.953156	-0.069215	0.961039	-0.0573331	12	0.0733767	0.19062	0.719832	0.065796	FALSE
EMM-Control	SPCC162.12	0.999362	-0.000920116	1.01168	0.0167536	0.999997	-4.24574e-06	1.00827	0.0118776	12	0.949977	0.987206	0.00559236	0.0290024	FALSE
EMM-Control	SPCC1620.03	0.996791	-0.00463691	1.00908	0.0130368	0.999271	-0.00105237	1.00753	0.0108295	12	0.797666	0.912163	0.0399275	0.0383058	FALSE
EMM-Control	SPCC16A11.08	1.00998	0.0143322	1.02243	0.0320059	1.00288	0.00414505	1.01117	0.0160269	12	0.557821	0.770631	0.113154	0.0547671	FALSE
EMM-Control	SPCC16C4.11	0.980972	-0.0277155	0.993064	-0.0100419	0.984547	-0.0224684	0.992689	-0.0105865	12	0.299748	0.490683	0.309199	0.0585751	FALSE
EMM-Control	SPCC1753.02c	0.903326	-0.146682	0.91446	-0.129008	0.909555	-0.136768	0.917077	-0.124886	12	0.00302634	0.0201542	1.69563	0.089598	TRUE
EMM-Control	SPCC188.02	0.992514	-0.01084	1.00475	0.00683364	1.0106	0.0152156	1.01896	0.0270975	12	0.684367	0.847481	0.0718702	0.0599332	FALSE
EMM-Control	SPCC18B5.03	1.01647	0.0235649	1.029	0.0412386	1.0231	0.0329485	1.03156	0.0448304	12	0.1339	0.288023	0.540572	0.0311931	FALSE
EMM-Control	SPCC24B10.18	0.964288	-0.0524635	0.976174	-0.0347898	0.991798	-0.0118819	1	0	12	0.107395	0.244451	0.611809	0.0695381	FALSE
EMM-Control	SPCC320.03	1.04809	0.0677652	1.06101	0.0854389	1.04213	0.0595408	1.05075	0.0714227	12	0.00141524	0.0116699	1.93293	0.0396602	FALSE
EMM-Control	SPCC320.07c	1.02371	0.0338123	1.03633	0.051486	1.01441	0.0206473	1.0228	0.0325292	12	0.100495	0.237595	0.624162	0.0433182	FALSE
EMM-Control	SPCC338.04	0.965081	-0.0512776	0.976977	-0.0336039	0.974417	-0.0373886	0.982475	-0.0255067	12	0.0184555	0.0711429	1.14787	0.0423072	FALSE
EMM-Control	SPCC4B3.03c	1.02149	0.0306805	1.03408	0.0483542	1.0145	0.0207676	1.02289	0.0326495	12	0.235661	0.420321	0.376419	0.0573909	FALSE
EMM-Control	SPCC4B3.12	0.974236	-0.0376566	0.986244	-0.0199829	0.990742	-0.0134188	0.998935	-0.0015369	12	0.210071	0.3892	0.409827	0.0655602	FALSE
EMM-Control	SPCC4G3.09c	0.97058	-0.0430805	0.982543	-0.0254069	0.989412	-0.0153571	0.997594	-0.00347521	12	0.0687382	0.184589	0.733794	0.0486481	FALSE
EMM-Control	SPCC4G3.12c	0.951051	-0.0724048	0.962774	-0.0547312	0.97543	-0.0358901	0.983496	-0.0240083	12	0.0179903	0.0704865	1.15189	0.0605555	FALSE
EMM-Control	SPCC4G3.17	0.984406	-0.0226743	0.99654	-0.00500063	0.998611	-0.00200458	1.00687	0.00987731	12	0.234174	0.420321	0.376419	0.0395664	FALSE
EMM-Control	SPCC553.01c	0.998455	-0.0022304	1.01076	0.0154433	0.979002	-0.0306161	0.987098	-0.0187342	12	0.968646	0.997073	0.00127303	0.133356	FALSE
EMM-Control	SPCC5E4.10c	0.99154	-0.0122576	1.00376	0.00541604	0.993613	-0.00924438	1.00183	0.00263751	12	0.647396	0.818665	0.0868938	0.0601756	FALSE
EMM-Control	SPCC613.03	0.994713	-0.00764754	1.00697	0.0100261	1.00398	0.0057302	1.01228	0.0176121	12	0.748371	0.872491	0.0592392	0.0530262	FALSE
EMM-Control	SPCC622.11	1.00609	0.00876198	1.01849	0.0264357	0.99624	-0.00543531	1.00448	0.00644658	11	0.688628	0.848361	0.0714194	0.0461339	FALSE
EMM-Control	SPCC63.03	0.999415	-0.000843968	1.01173	0.0168297	1.00228	0.0032883	1.01057	0.0151702	12	0.950031	0.987206	0.00559236	0.0254878	FALSE
EMM-Control	SPCC63.06	0.951544	-0.0716582	0.963272	-0.0539845	0.944459	-0.0824403	0.952269	-0.0705584	12	0.00835709	0.0399077	1.39894	0.0519652	TRUE
EMM-Control	SPCC663.06c	0.986926	-0.0189865	0.99909	-0.00131279	0.982441	-0.0255572	0.990566	-0.0136753	12	0.248192	0.430485	0.366042	0.0329455	FALSE
EMM-Control	SPCC736.13	0.99182	-0.0118493	1.00405	0.00582438	0.986382	-0.0197817	0.994539	-0.00789976	12	0.696768	0.84963	0.0707702	0.0691303	FALSE
EMM-Control	SPCC794.03	1.00985	0.0141431	1.0223	0.0318168	1.02059	0.0294036	1.02903	0.0412855	12	0.403396	0.6102	0.214528	0.0351061	FALSE
EMM-Control	SPCC962.05	1.02406	0.0342973	1.03668	0.051971	1.02827	0.0402256	1.03678	0.0521075	12	0.0308907	0.10254	0.989107	0.030609	FALSE
EMM-Control	SPCC965.12	1.02196	0.0313406	1.03456	0.0490143	1.02438	0.0347503	1.03285	0.0466322	12	0.0949758	0.231625	0.635215	0.038758	FALSE
EMM-Control	SPCP31B10.02	1.00241	0.00347115	1.01476	0.0211448	0.998787	-0.00175169	1.00705	0.0101302	12	0.82531	0.918657	0.0368467	0.0320383	FALSE
EMMphlox-Control	972	1	0	1.01937	0.027675	1	0	1.01626	0.0232688	110	1	1	0	0.0301432	FALSE
EMMphlox-Control	SPAC105.02c	0.990756	-0.0133986	1.00994	0.0142764	0.984383	-0.0227081	1.00039	0.000560695	10	0.581757	0.658957	0.181143	0.0514751	FALSE
EMMphlox-Control	SPAC1071.07c	0.853325	-0.228833	0.869852	-0.201158	0.864303	-0.21039	0.878356	-0.187122	10	0.000489732	0.00212811	2.67201	0.0895029	TRUE
EMMphlox-Control	SPAC1071.09c	1.03409	0.0483659	1.05412	0.0760409	1.03532	0.0500719	1.05215	0.0733406	10	0.00177682	0.00583256	2.23414	0.0255575	FALSE
EMMphlox-Control	SPAC10F6.14c	0.963711	-0.0533268	0.982377	-0.0256518	0.97985	-0.0293673	0.995782	-0.0060985	10	0.000469629	0.00207854	2.68224	0.0228969	FALSE
EMMphlox-Control	SPAC11E3.12	1.0485	0.0683237	1.06881	0.0959987	1.05599	0.0785942	1.07316	0.101863	10	8.574e-05	0.000569218	3.24472	0.0249155	TRUE
EMMphlox-Control	SPAC12G12.11c	0.975693	-0.035501	0.99459	-0.00782601	0.971546	-0.0416452	0.987343	-0.0183765	10	0.0796111	0.127698	0.893815	0.0391165	FALSE
EMMphlox-Control	SPAC13A11.06	1.03146	0.0446826	1.05143	0.0723576	1.02991	0.042516	1.04665	0.0657848	10	0.00815521	0.0203031	1.69244	0.029969	FALSE
EMMphlox-Control	SPAC13F5.03c	0.967313	-0.0479447	0.986048	-0.0202697	0.974632	-0.0370709	0.990479	-0.0138021	10	0.000706766	0.00291236	2.53575	0.0217408	FALSE
EMMphlox-Control	SPAC13F5.04c	1.00865	0.0124233	1.02818	0.0400983	1.0121	0.0173522	1.02856	0.0406209	10	0.33043	0.424585	0.372035	0.0258667	FALSE
EMMphlox-Control	SPAC140.01	0.971545	-0.0416473	0.990362	-0.0139723	0.988595	-0.016549	1.00467	0.0067198	10	0.031839	0.0603931	1.21901	0.0357727	FALSE
EMMphlox-Control	SPAC1556.02c	0.933225	-0.0997029	0.9513	-0.0720278	0.936666	-0.094394	0.951895	-0.0711252	10	3.13769e-09	3.74954e-07	6.42602	0.0158331	TRUE
EMMphlox-Control	SPAC15A10.10	0.989516	-0.0152056	1.00868	0.0124694	0.985055	-0.0217233	1.00107	0.0015455	10	0.263094	0.359311	0.444529	0.027191	FALSE
EMMphlox-Control	SPAC16.01	0.976073	-0.0349397	0.994977	-0.00726464	0.97963	-0.0296907	0.995559	-0.00642187	10	0.0124977	0.0282538	1.54892	0.0245082	FALSE
EMMphlox-Control	SPAC1610.02c	0.93746	-0.0931713	0.955617	-0.0654963	0.952731	-0.0698587	0.968222	-0.04659	10	2.78953e-05	0.000251612	3.59927	0.0280015	FALSE
EMMphlox-Control	SPAC1687.14c	1.0147	0.021058	1.03436	0.048733	1.01962	0.0280291	1.0362	0.0512978	10	0.267666	0.363479	0.439521	0.0393381	FALSE
EMMphlox-Control	SPAC1687.15	0.994837	-0.0074678	1.01411	0.0202072	0.994094	-0.00854513	1.01026	0.0147236	10	0.505712	0.595395	0.225195	0.0225013	FALSE
EMMphlox-Control	SPAC16E8.01	0.860704	-0.21641	0.877374	-0.188735	0.853922	-0.227823	0.867807	-0.204554	10	6.50962e-07	1.94475e-05	4.71114	0.0396205	TRUE
EMMphlox-Control	SPAC1705.02	1.02448	0.0348973	1.04433	0.0625723	1.03111	0.0442026	1.04788	0.0674714	10	0.0237799	0.0485761	1.31358	0.0286572	FALSE
EMMphlox-Control	SPAC17A2.02c	0.900124	-0.151805	0.917558	-0.12413	0.897449	-0.156098	0.912041	-0.132829	8	0.000242917	0.00120952	2.91739	0.0433783	TRUE
EMMphlox-Control	SPAC17A5.16	0.968761	-0.0457879	0.987524	-0.0181129	0.959991	-0.0589076	0.9756	-0.0356388	10	0.00984602	0.0230706	1.63694	0.0307927	FALSE
EMMphlox-Control	SPAC17H9.04c	0.883307	-0.179012	0.900415	-0.151337	0.882343	-0.180588	0.89669	-0.15732	10	8.97394e-09	5.36193e-07	6.27068	0.0244792	TRUE
EMMphlox-Control	SPAC17H9.06c	0.97607	-0.0349434	0.994975	-0.00726842	0.972886	-0.0396575	0.988704	-0.0163887	10	0.120708	0.184931	0.732991	0.0444578	FALSE
EMMphlox-Control	SPAC1805.07c	0.90528	-0.143564	0.922813	-0.115889	0.921545	-0.117873	0.936529	-0.0946043	10	3.08006e-05	0.000262905	3.5802	0.0413768	TRUE
EMMphlox-Control	SPAC1834.04	1.00544	0.00783035	1.02492	0.0355054	0.998655	-0.00194137	1.01489	0.0213274	10	0.556692	0.63966	0.194051	0.0274822	FALSE
EMMphlox-Control	SPAC1834.09	0.994901	-0.0073758	1.01417	0.0202992	0.994249	-0.00832159	1.01041	0.0149472	10	0.579516	0.658957	0.181143	0.0273268	FALSE
EMMphlox-Control	SPAC186.06	0.996266	-0.00539661	1.01556	0.0222784	0.996171	-0.00553422	1.01237	0.0177346	10	0.503826	0.595395	0.225195	0.0150854	FALSE
EMMphlox-Control	SPAC18B11.04	1.0067	0.00963171	1.0262	0.0373067	1.00997	0.0143064	1.02639	0.0375752	10	0.37237	0.468402	0.329381	0.0214937	FALSE
EMMphlox-Control	SPAC19B12.07c	1.00789	0.0113351	1.02741	0.0390101	1.00413	0.00594866	1.02046	0.0292174	10	0.281034	0.375235	0.425697	0.0206801	FALSE
EMMphlox-Control	SPAC19G12.15c	0.716037	-0.481895	0.729905	-0.45422	0.727444	-0.459091	0.739272	-0.435822	10	1.03125e-06	2.46469e-05	4.60824	0.0804753	TRUE
EMMphlox-Control	SPAC1A6.04c	0.90391	-0.14575	0.921417	-0.118075	0.912854	-0.131543	0.927697	-0.108275	10	7.64671e-06	0.00013054	3.88426	0.0361893	TRUE
EMMphlox-Control	SPAC1B9.02c	0.961059	-0.0573036	0.979672	-0.0296286	0.9702	-0.0436452	0.985975	-0.0203764	10	9.56812e-05	0.000618049	3.20898	0.020612	FALSE
EMMphlox-Control	SPAC1D4.03c	0.988587	-0.0165595	1.00773	0.0111155	0.98892	-0.0160744	1.005	0.00719434	10	0.246512	0.342538	0.465292	0.0286314	FALSE
EMMphlox-Control	SPAC1F3.09	0.970104	-0.0437883	0.988893	-0.0161133	0.969864	-0.0441452	0.985634	-0.0208764	10	0.00517903	0.0143683	1.84259	0.0263447	FALSE
EMMphlox-Control	SPAC1F8.06	1.00127	0.00182658	1.02066	0.0295016	0.998788	-0.00174948	1.01503	0.0215193	10	0.905358	0.932675	0.0302699	0.0322723	FALSE
EMMphlox-Control	SPAC20G4.05c	1.01938	0.0276944	1.03913	0.0553694	1.03289	0.0466866	1.04968	0.0699554	10	0.0282087	0.0552614	1.25758	0.0233166	FALSE
EMMphlox-Control	SPAC20H4.03c	0.975307	-0.036072	0.994197	-0.00839693	0.995327	-0.00675767	1.01151	0.0165111	10	0.0450338	0.0797265	1.0984	0.0337261	FALSE
EMMphlox-Control	SPAC21E11.04	1.00188	0.00270916	1.02128	0.0303842	1.00877	0.0125995	1.02517	0.0358683	10	0.731386	0.794551	0.0998781	0.0147905	FALSE
EMMphlox-Control	SPAC227.17c	0.911401	-0.133842	0.929053	-0.106167	0.909951	-0.136139	0.924746	-0.112871	10	0.000223042	0.00115885	2.93597	0.0491019	TRUE
EMMphlox-Control	SPAC22A12.06c	1.03449	0.0489165	1.05452	0.0765915	1.04903	0.0690522	1.06608	0.0923209	10	0.00411896	0.0120053	1.92063	0.0293068	FALSE
EMMphlox-Control	SPAC22A12.14c	0.992477	-0.0108948	1.0117	0.0167802	0.989774	-0.0148292	1.00587	0.00843961	10	0.519291	0.605417	0.217945	0.0351835	FALSE
EMMphlox-Control	SPAC22E12.14c	0.85945	-0.218515	0.876096	-0.19084	0.866074	-0.207438	0.880155	-0.18417	10	3.80459e-06	7.57748e-05	4.12048	0.0476675	TRUE
EMMphlox-Control	SPAC22F3.04	1.01672	0.0239273	1.03642	0.0516023	1.00336	0.00483424	1.01967	0.028103	10	0.139276	0.205476	0.687239	0.0324385	FALSE
EMMphlox-Control	SPAC23A1.06c	0.962736	-0.0547882	0.981382	-0.0271131	0.966757	-0.0487742	0.982476	-0.0255054	10	0.00317161	0.00947518	2.02341	0.0303882	FALSE
EMMphlox-Control	SPAC23C11.08	0.898489	-0.154428	0.915891	-0.126753	0.913258	-0.130906	0.928107	-0.107638	10	8.17188e-05	0.000566926	3.24647	0.0494558	TRUE
EMMphlox-Control	SPAC23C4.09c	1.04792	0.0675229	1.06821	0.0951979	1.04333	0.0611976	1.0603	0.0844664	10	0.00621293	0.0163175	1.78735	0.043584	FALSE
EMMphlox-Control	SPAC23D3.03c	1.01191	0.0170804	1.03151	0.0447554	1.02499	0.035613	1.04166	0.0588818	10	0.388459	0.478566	0.320058	0.0415745	FALSE
EMMphlox-Control	SPAC23D3.04c	0.916395	-0.125959	0.934144	-0.0982839	0.917676	-0.123944	0.932596	-0.100675	10	0.000807416	0.00321621	2.49266	0.0551103	TRUE
EMMphlox-Control	SPAC23G3.05c	0.998973	-0.00148237	1.01832	0.0261927	0.980385	-0.0285799	0.996325	-0.00531112	10	0.9548	0.979387	0.00904546	0.0561529	FALSE
EMMphlox-Control	SPAC23H4.09	1.01198	0.0171824	1.03158	0.0448574	1.01072	0.015385	1.02715	0.0386538	10	0.193449	0.276852	0.557752	0.0264014	FALSE
EMMphlox-Control	SPAC24H6.04	1.01048	0.0150378	1.03005	0.0427128	1.01086	0.0155873	1.0273	0.0388561	10	0.27657	0.371349	0.430218	0.0280641	FALSE
EMMphlox-Control	SPAC25A8.03c	1.00492	0.00707999	1.02438	0.034755	1.01017	0.0145975	1.02659	0.0378663	10	0.493871	0.587239	0.231185	0.0206014	FALSE
EMMphlox-Control	SPAC25B8.08	0.990228	-0.014167	1.00941	0.013508	0.996336	-0.00529527	1.01254	0.0179735	10	0.209661	0.296503	0.527971	0.0219924	FALSE
EMMphlox-Control	SPAC26F1.10c	0.818838	-0.288351	0.834697	-0.260676	0.81625	-0.292918	0.829521	-0.269649	10	2.5774e-07	1.02666e-05	4.98857	0.0457542	TRUE
EMMphlox-Control	SPAC26F1.12c	0.984365	-0.0227352	1.00343	0.00493979	0.98739	-0.0183082	1.00344	0.00496063	10	0.0145254	0.0318492	1.4969	0.0159376	FALSE
EMMphlox-Control	SPAC27E2.03c	0.944774	-0.0819591	0.963072	-0.0542841	0.960118	-0.0587166	0.975729	-0.0354478	10	0.00178149	0.00583256	2.23414	0.041087	FALSE
EMMphlox-Control	SPAC29A4.20	0.93766	-0.0928627	0.955821	-0.0651877	0.938713	-0.0912443	0.953976	-0.0679755	10	0.00949005	0.0225126	1.64758	0.061218	TRUE
EMMphlox-Control	SPAC2F3.18c	0.979475	-0.0299198	0.998445	-0.00224481	0.984001	-0.0232688	1	0	10	0.0203294	0.0426205	1.37038	0.0230312	FALSE
EMMphlox-Control	SPAC32A11.03c	0.992097	-0.0114469	1.01131	0.0162281	0.99443	-0.00805759	1.0106	0.0152112	10	0.283654	0.376629	0.424086	0.0208626	FALSE
EMMphlox-Control	SPAC3A11.02	0.940073	-0.0891554	0.95828	-0.0614804	0.93564	-0.095974	0.950853	-0.0727052	10	1.19704e-05	0.000168867	3.77246	0.024895	TRUE
EMMphlox-Control	SPAC3A11.10c	0.998618	-0.0019954	1.01796	0.0256796	0.999468	-0.000767672	1.01572	0.0225011	10	0.860797	0.902327	0.0446361	0.0231455	FALSE
EMMphlox-Control	SPAC3A11.11c	1.0094	0.0135026	1.02895	0.0411777	1.01036	0.0148711	1.02679	0.0381398	10	0.158462	0.230929	0.636521	0.0182013	FALSE
EMMphlox-Control	SPAC3A12.03c	1.01334	0.0191174	1.03297	0.0467924	1.01628	0.0232978	1.0328	0.0465666	10	0.0434047	0.0779978	1.10792	0.0171947	FALSE
EMMphlox-Control	SPAC3A12.13c	0.920997	-0.118732	0.938835	-0.0910565	0.93538	-0.0963761	0.950588	-0.0731073	10	0.00164934	0.00571293	2.24314	0.0578353	TRUE
EMMphlox-Control	SPAC3G6.03c	0.967205	-0.0481066	0.985938	-0.0204316	0.972443	-0.0403151	0.988254	-0.0170463	10	0.000778766	0.00315466	2.50105	0.0220726	FALSE
EMMphlox-Control	SPAC3G6.05	0.96786	-0.0471297	0.986606	-0.0194547	0.971456	-0.0417798	0.987251	-0.018511	10	0.00162288	0.00570396	2.24382	0.0238109	FALSE
EMMphlox-Control	SPAC3G9.11c	0.961553	-0.0565622	0.980176	-0.0288872	0.966986	-0.0484333	0.982709	-0.0251645	10	2.82238e-05	0.000251612	3.59927	0.0182129	FALSE
EMMphlox-Control	SPAC3H1.03	0.987114	-0.0187112	1.00623	0.00896379	0.987956	-0.0174811	1.00402	0.00578765	8	0.382651	0.473853	0.324357	0.0392701	FALSE
EMMphlox-Control	SPAC3H1.08c	0.937499	-0.0931113	0.955656	-0.0654363	0.939484	-0.0900592	0.95476	-0.0667905	10	0.000158781	0.000950661	3.02197	0.0337397	TRUE
EMMphlox-Control	SPAC3H1.11	0.98709	-0.0187465	1.00621	0.00892852	0.980795	-0.0279763	0.996742	-0.00470752	10	0.186761	0.268892	0.570423	0.0281189	FALSE
EMMphlox-Control	SPAC3H5.08c	0.913817	-0.130022	0.931516	-0.102347	0.928985	-0.106273	0.94409	-0.0830039	10	1.40978e-05	0.000184801	3.7333	0.0348972	TRUE
EMMphlox-Control	SPAC3H5.09c	1.01809	0.0258704	1.03781	0.0535454	1.01536	0.0219858	1.03187	0.0452546	10	0.0512029	0.0887842	1.05166	0.0252101	FALSE
EMMphlox-Control	SPAC3H5.10	0.929777	-0.105044	0.947785	-0.0773686	0.948534	-0.0762285	0.963957	-0.0529597	10	0.00674427	0.0175205	1.75645	0.0647709	TRUE
EMMphlox-Control	SPAC3H8.03	0.894819	-0.160332	0.91215	-0.132657	0.913841	-0.129985	0.9287	-0.106716	9	0.000159107	0.000950661	3.02197	0.049411	TRUE
EMMphlox-Control	SPAC3H8.04	1.00302	0.00434627	1.02244	0.0320213	1.00505	0.00726161	1.02139	0.0305304	10	0.644408	0.719689	0.142855	0.0185003	FALSE
EMMphlox-Control	SPAC4G9.11c	0.969712	-0.0443711	0.988494	-0.016696	0.976426	-0.0344173	0.992302	-0.0111485	9	0.00372086	0.0109788	1.95944	0.023309	FALSE
EMMphlox-Control	SPAC4G9.14	0.972611	-0.0400656	0.991448	-0.0123906	0.982712	-0.0251593	0.99869	-0.00189053	10	0.00873028	0.0212912	1.6718	0.0263545	FALSE
EMMphlox-Control	SPAC4H3.04c	1.01417	0.0202998	1.03381	0.0479748	0.999075	-0.00133468	1.01532	0.0219341	10	0.342172	0.435998	0.360515	0.0448355	FALSE
EMMphlox-Control	SPAC4H3.06	0.996442	-0.00514237	1.01574	0.0225327	0.998472	-0.00220552	1.01471	0.0210633	10	0.488437	0.586616	0.231646	0.0134466	FALSE
EMMphlox-Control	SPAC4H3.07c	0.855975	-0.224359	0.872554	-0.196684	0.866789	-0.206247	0.880882	-0.182979	10	6.26973e-07	1.94475e-05	4.71114	0.0406584	TRUE
EMMphlox-Control	SPAC521.03	0.967074	-0.0483025	0.985804	-0.0206275	0.969228	-0.0450914	0.984988	-0.0218227	10	0.000369451	0.00169805	2.77005	0.0202944	FALSE
EMMphlox-Control	SPAC56F8.02	1.01664	0.0238026	1.03633	0.0514776	1.02432	0.03467	1.04098	0.0579388	10	0.0313927	0.0600228	1.22168	0.0202791	FALSE
EMMphlox-Control	SPAC57A7.09	0.995637	-0.00630806	1.01492	0.021367	1.00393	0.00565649	1.02025	0.0289253	10	0.789639	0.840556	0.0754335	0.0504518	FALSE
EMMphlox-Control	SPAC589.07c	1.00614	0.00883576	1.02563	0.0365108	0.985034	-0.021754	1.00105	0.00151483	10	0.709734	0.781689	0.106966	0.0508343	FALSE
EMMphlox-Control	SPAC5H10.06c	1.01576	0.0225598	1.03543	0.0502348	1.00967	0.0138887	1.02609	0.0371575	10	0.0970645	0.151624	0.819233	0.0265489	FALSE
EMMphlox-Control	SPAC637.07	0.979444	-0.0299647	0.998414	-0.00228971	0.984001	-0.0232688	1	0	10	0.012531	0.0282538	1.54892	0.0209105	FALSE
EMMphlox-Control	SPAC652.01	0.983097	-0.0245937	1.00214	0.00308133	0.975659	-0.0355517	0.991522	-0.012283	10	0.274041	0.370033	0.431759	0.0461116	FALSE
EMMphlox-Control	SPAC683.02c	1.01922	0.0274693	1.03896	0.0551444	1.02635	0.03752	1.04304	0.0607888	10	0.0243931	0.0489912	1.30988	0.0223564	FALSE
EMMphlox-Control	SPAC688.03c	0.993606	-0.00925399	1.01285	0.018421	0.997928	-0.00299181	1.01415	0.020277	10	0.316922	0.413904	0.3831	0.0176745	FALSE
EMMphlox-Control	SPAC688.13	0.981483	-0.0269649	1.00049	0.00071009	0.988909	-0.0160905	1.00499	0.00717827	10	0.00300922	0.00910386	2.04077	0.0146811	FALSE
EMMphlox-Control	SPAC694.02	0.953809	-0.0682278	0.972282	-0.0405528	0.961292	-0.0569528	0.976922	-0.033684	9	0.000135863	0.000854505	3.06829	0.022594	FALSE
EMMphlox-Control	SPAC694.04c	0.979156	-0.0303886	0.998121	-0.00271362	0.984001	-0.0232688	1	0	10	0.0223202	0.0463872	1.3336	0.0238874	FALSE
EMMphlox-Control	SPAC694.06c	0.986609	-0.0194489	1.00572	0.0082261	0.984066	-0.0231725	1.00007	9.63007e-05	10	0.131673	0.196687	0.706225	0.024999	FALSE
EMMphlox-Control	SPAC6F12.02	0.957972	-0.0619449	0.976526	-0.0342699	0.965833	-0.0501547	0.981537	-0.0268859	10	0.00457317	0.0131685	1.88046	0.0363077	FALSE
EMMphlox-Control	SPAC6F6.13c	0.974749	-0.0368969	0.993628	-0.00922185	0.979244	-0.0302604	0.995165	-0.00699164	10	0.00107	0.00387469	2.41176	0.0177239	FALSE
EMMphlox-Control	SPAC6G10.10c	0.971014	-0.042436	0.989821	-0.014761	0.979146	-0.0304034	0.995067	-0.00713459	10	0.0363097	0.0672715	1.17217	0.0376379	FALSE
EMMphlox-Control	SPAC7D4.05	1.01334	0.0191182	1.03297	0.0467933	1.02079	0.0296929	1.03739	0.0529617	10	0.19971	0.284112	0.546511	0.0301208	FALSE
EMMphlox-Control	SPAC806.04c	0.993761	-0.00902983	1.01301	0.0186452	0.99353	-0.00936463	1.00968	0.0139042	10	0.448854	0.547328	0.261753	0.0240085	FALSE
EMMphlox-Control	SPAC806.07	0.970512	-0.0431819	0.989309	-0.0155068	0.984001	-0.0232688	1	0	10	0.00033552	0.00159313	2.79775	0.0180553	FALSE
EMMphlox-Control	SPAC821.05	0.919187	-0.12157	0.93699	-0.0938952	0.916508	-0.125781	0.931409	-0.102513	10	0.000336397	0.00159313	2.79775	0.0473486	TRUE
EMMphlox-Control	SPAC821.07c	1.12544	0.170489	1.14724	0.198164	1.13188	0.178717	1.15028	0.201986	10	1.84902e-07	8.83829e-06	5.05363	0.0323767	TRUE
EMMphlox-Control	SPAC823.09c	0.992969	-0.010179	1.0122	0.0174961	1.00039	0.000563873	1.01666	0.0238327	10	0.455826	0.550886	0.258939	0.0278762	FALSE
EMMphlox-Control	SPAC823.16c	1.0349	0.0494908	1.05494	0.0771659	1.03002	0.0426779	1.04677	0.0659467	10	0.000823016	0.00322461	2.49152	0.0236105	FALSE
EMMphlox-Control	SPAC890.03	1.00673	0.00968151	1.02623	0.0373565	1.01048	0.0150376	1.02691	0.0383064	9	0.628747	0.705496	0.151506	0.0401877	FALSE
EMMphlox-Control	SPAC8C9.06c	0.324646	-1.62306	0.330934	-1.59539	0.259504	-1.94617	0.263723	-1.9229	9	2.08106e-05	0.000226079	3.64574	0.23352	TRUE
EMMphlox-Control	SPAC8C9.16c	0.969014	-0.0454111	0.987782	-0.017736	0.978198	-0.0318016	0.994103	-0.00853282	10	0.00249693	0.00775021	2.11069	0.0244027	FALSE
EMMphlox-Control	SPAC8F11.03	0.98583	-0.0205892	1.00492	0.00708582	0.987324	-0.0184048	1.00338	0.00486398	10	0.0237655	0.0485761	1.31358	0.0158337	FALSE
EMMphlox-Control	SPAC977.15	0.981826	-0.0264614	1.00084	0.00121366	0.984001	-0.0232688	1	0	10	0.0444685	0.0793133	1.10065	0.0243788	FALSE
EMMphlox-Control	SPACUNK4.13c	1.01755	0.025101	1.03726	0.052776	1.00858	0.0123272	1.02498	0.035596	10	0.0304397	0.0586701	1.23158	0.0213396	FALSE
EMMphlox-Control	SPACUNK4.16c	0.970234	-0.0435953	0.989026	-0.0159203	0.966122	-0.0497223	0.981831	-0.0264536	10	0.00849504	0.0209311	1.67921	0.0285449	FALSE
EMMphlox-Control	SPACUNK4.17	1.00009	0.000127377	1.01946	0.0278024	0.988917	-0.0160781	1.005	0.00719072	10	0.993066	0.997239	0.0012009	0.0306735	FALSE
EMMphlox-Control	SPAP14E8.05c	1.01928	0.0275511	1.03902	0.0552261	1.02781	0.0395748	1.04452	0.0628436	10	0.0175119	0.0377058	1.42359	0.0208789	FALSE
EMMphlox-Control	SPAP27G11.12	0.968782	-0.0457559	0.987545	-0.0180809	0.977634	-0.0326335	0.99353	-0.00936474	10	0.00951367	0.0225126	1.64758	0.0305778	FALSE
EMMphlox-Control	SPAP8A3.04c	1.00434	0.00625107	1.02379	0.0339261	1.00635	0.00913261	1.02271	0.0324014	10	0.456382	0.550886	0.258939	0.0159167	FALSE
EMMphlox-Control	SPAPB1A11.02	1.03949	0.0558783	1.05962	0.0835533	1.04043	0.057181	1.05735	0.0804498	10	0.00526514	0.0143683	1.84259	0.0349284	FALSE
EMMphlox-Control	SPAPB1E7.11c	1.04485	0.0632897	1.06508	0.0909648	1.04648	0.0655477	1.0635	0.0888165	10	0.000197908	0.001075	2.96859	0.0253437	FALSE
EMMphlox-Control	SPAPB24D3.08c	0.973029	-0.0394452	0.991875	-0.0117702	0.974398	-0.0374172	0.990241	-0.0141485	10	0.000339956	0.00159313	2.79775	0.0165692	FALSE
EMMphlox-Control	SPAPB2B4.07	0.984957	-0.0218675	1.00403	0.00580757	0.988733	-0.0163476	1.00481	0.00692121	10	0.238989	0.334025	0.476221	0.0376624	FALSE
EMMphlox-Control	SPBC106.10	0.964091	-0.0527589	0.982763	-0.0250839	0.968435	-0.0462726	0.984181	-0.0230038	10	0.00020687	0.00109871	2.95912	0.020685	FALSE
EMMphlox-Control	SPBC1105.05	0.928427	-0.107139	0.946409	-0.0794644	0.916842	-0.125254	0.93175	-0.101985	10	0.00728413	0.0185203	1.73235	0.0669356	TRUE
EMMphlox-Control	SPBC1105.14	1.10267	0.141006	1.12403	0.168681	1.09575	0.131915	1.11356	0.155184	10	6.57093e-05	0.000506598	3.29534	0.0487139	TRUE
EMMphlox-Control	SPBC119.03	0.998652	-0.00194544	1.01799	0.0257296	0.997597	-0.00347078	1.01382	0.019798	10	0.874028	0.908229	0.0418045	0.0252054	FALSE
EMMphlox-Control	SPBC119.16c	0.947396	-0.0779599	0.965746	-0.0502849	0.953663	-0.0684488	0.969169	-0.04518	10	0.000189518	0.00106913	2.97097	0.0292829	FALSE
EMMphlox-Control	SPBC1198.07c	1.00389	0.00559619	1.02333	0.0332712	1.00613	0.0088194	1.02249	0.0320882	9	0.794835	0.840556	0.0754335	0.0434678	FALSE
EMMphlox-Control	SPBC1198.11c	0.779553	-0.359281	0.794651	-0.331606	0.801793	-0.318699	0.81483	-0.29543	10	7.4099e-06	0.00013054	3.88426	0.0787865	TRUE
EMMphlox-Control	SPBC1198.14c	1.0105	0.0150712	1.03007	0.0427462	1.01585	0.0226862	1.03237	0.045955	10	0.33003	0.424585	0.372035	0.0318749	FALSE
EMMphlox-Control	SPBC11B10.10c	0.886764	-0.173378	0.903939	-0.145703	0.898081	-0.155082	0.912684	-0.131813	10	2.96772e-06	6.44805e-05	4.19057	0.0381706	TRUE
EMMphlox-Control	SPBC14C8.15	0.932517	-0.100798	0.950578	-0.0731227	0.934294	-0.0980508	0.949486	-0.074782	10	6.91041e-05	0.000516122	3.28725	0.0329927	TRUE
EMMphlox-Control	SPBC14C8.16c	0.958568	-0.0610472	0.977134	-0.0333722	0.961387	-0.0568104	0.977019	-0.0335416	10	0.000163929	0.000955584	3.01973	0.0230642	FALSE
EMMphlox-Control	SPBC14F5.10c	1.03057	0.0434376	1.05053	0.0711126	1.02961	0.0420921	1.04635	0.0653609	10	0.0016979	0.00579713	2.23679	0.022797	FALSE
EMMphlox-Control	SPBC1539.02	0.976873	-0.0337566	0.995793	-0.00608154	0.97314	-0.0392814	0.988962	-0.0160126	10	0.0386298	0.0710194	1.14862	0.0302925	FALSE
EMMphlox-Control	SPBC15C4.06c	0.993625	-0.00922614	1.01287	0.0184489	0.986411	-0.0197394	1.00245	0.00352935	10	0.343479	0.435998	0.360515	0.0188606	FALSE
EMMphlox-Control	SPBC15D4.05	0.985207	-0.0215018	1.00429	0.00617324	0.990458	-0.0138321	1.00656	0.00943669	10	0.157999	0.230929	0.636521	0.0300741	FALSE
EMMphlox-Control	SPBC1604.16c	0.991593	-0.0121806	1.0108	0.0154944	0.995134	-0.00703662	1.01131	0.0162322	10	0.510111	0.59763	0.223568	0.0386275	FALSE
EMMphlox-Control	SPBC16A3.02c	1.00311	0.00448321	1.02254	0.0321582	1.01093	0.0156823	1.02737	0.0389511	10	0.703908	0.778861	0.10854	0.0241031	FALSE
EMMphlox-Control	SPBC16A3.08c	0.916868	-0.125214	0.934626	-0.0975386	0.908634	-0.138229	0.923408	-0.11496	10	0.00210603	0.00671122	2.1732	0.0631488	TRUE
EMMphlox-Control	SPBC16C6.01c	1.04191	0.0592365	1.06209	0.0869115	1.04236	0.0598515	1.05931	0.0831203	10	0.00197276	0.00637149	2.19576	0.0317935	FALSE
EMMphlox-Control	SPBC16D10.08c	0.940833	-0.0879894	0.959055	-0.0603144	0.936024	-0.0953833	0.951243	-0.0721145	10	1.20114e-05	0.000168867	3.77246	0.0246285	TRUE
EMMphlox-Control	SPBC16E9.13	0.975919	-0.0351669	0.99482	-0.00749187	0.988287	-0.0169986	1.00436	0.00627015	10	0.175676	0.254465	0.594372	0.0522885	FALSE
EMMphlox-Control	SPBC16E9.16c	0.995915	-0.00590588	1.0152	0.0217691	1.01259	0.0180529	1.02906	0.0413217	10	0.773856	0.833116	0.0792947	0.0436443	FALSE
EMMphlox-Control	SPBC16H5.13	1.02088	0.0298131	1.04065	0.0574881	1.02822	0.0401523	1.04494	0.0634211	10	0.122745	0.186216	0.729982	0.038882	FALSE
EMMphlox-Control	SPBC16H5.14c	1.02422	0.034524	1.04406	0.062199	1.02489	0.035469	1.04155	0.0587378	10	0.0590305	0.0986594	1.00586	0.0356073	FALSE
EMMphlox-Control	SPBC1709.09	0.963719	-0.0533149	0.982385	-0.0256399	0.985433	-0.0211699	1.00146	0.00209883	10	0.0420998	0.076808	1.11459	0.0490933	FALSE
EMMphlox-Control	SPBC1778.07	0.996305	-0.00534044	1.0156	0.0223346	0.992221	-0.0112659	1.00835	0.0120029	10	0.771963	0.833116	0.0792947	0.0389514	FALSE
EMMphlox-Control	SPBC17G9.07	0.870471	-0.200131	0.887331	-0.172456	0.884617	-0.176876	0.899	-0.153607	10	0.00225167	0.00708092	2.14991	0.0992017	TRUE
EMMphlox-Control	SPBC17G9.09	1.00487	0.00700969	1.02433	0.0346847	1.00543	0.00780989	1.02178	0.0310787	10	0.727155	0.794551	0.0998781	0.0427734	FALSE
EMMphlox-Control	SPBC1861.02	1.04812	0.0677992	1.06842	0.0954742	1.05311	0.0746616	1.07024	0.0979304	10	0.00689586	0.0177216	1.7515	0.0445745	TRUE
EMMphlox-Control	SPBC18A7.01	1.01068	0.0153291	1.03026	0.0430042	1.00146	0.00210362	1.01774	0.0253724	10	0.492339	0.587239	0.231185	0.0473906	FALSE
EMMphlox-Control	SPBC18E5.10	0.965198	-0.0511037	0.983892	-0.0234286	0.983938	-0.0233602	0.999937	-9.14036e-05	10	0.0512645	0.0887842	1.05166	0.0495858	FALSE
EMMphlox-Control	SPBC18H10.02	0.74816	-0.418582	0.76265	-0.390907	0.738654	-0.43703	0.750664	-0.413761	9	8.30226e-05	0.000566926	3.24647	0.105992	TRUE
EMMphlox-Control	SPBC18H10.04c	1.0096	0.0137799	1.02915	0.041455	1.023	0.0328024	1.03963	0.0560712	10	0.588238	0.663155	0.178385	0.054463	FALSE
EMMphlox-Control	SPBC18H10.05	1.01684	0.024086	1.03653	0.051761	1.0204	0.0291303	1.03699	0.0523991	10	0.134825	0.200143	0.698659	0.0322359	FALSE
EMMphlox-Control	SPBC19C7.01	1.00857	0.0123098	1.0281	0.0399848	1.0025	0.00359791	1.0188	0.0268667	10	0.548152	0.632891	0.198671	0.0434709	FALSE
EMMphlox-Control	SPBC1D7.03	0.850675	-0.233319	0.867151	-0.205644	0.847886	-0.238058	0.861672	-0.214789	10	9.31187e-06	0.000148369	3.82866	0.0556096	TRUE
EMMphlox-Control	SPBC20F10.02c	1.00866	0.0124461	1.0282	0.0401211	1.00161	0.0023231	1.0179	0.0255919	10	0.324404	0.421373	0.375334	0.0255506	FALSE
EMMphlox-Control	SPBC20F10.03	0.965053	-0.0513197	0.983744	-0.0236447	0.963106	-0.0542335	0.978766	-0.0309647	10	1.54645e-05	0.000184801	3.7333	0.015926	FALSE
EMMphlox-Control	SPBC21.03c	0.981059	-0.0275887	1.00006	8.63684e-05	0.985208	-0.0214994	1.00123	0.00176938	10	0.00590979	0.0156938	1.80427	0.0167419	FALSE
EMMphlox-Control	SPBC215.05	0.981058	-0.0275899	1.00006	8.51418e-05	0.982369	-0.0256625	0.998342	-0.00239372	10	0.123105	0.186216	0.729982	0.0351835	FALSE
EMMphlox-Control	SPBC215.06c	0.968984	-0.0454557	0.987751	-0.0177807	0.970837	-0.0426988	0.986622	-0.01943	10	0.014337	0.0317273	1.49857	0.0328471	FALSE
EMMphlox-Control	SPBC21C3.03	1.01149	0.0164771	1.03108	0.0441521	1.01726	0.024687	1.0338	0.0479557	10	0.109033	0.169214	0.771564	0.019542	FALSE
EMMphlox-Control	SPBC21C3.08c	1.00205	0.00295755	1.02146	0.0306326	1.01043	0.0149632	1.02685	0.038232	10	0.791716	0.840556	0.0754335	0.0227518	FALSE
EMMphlox-Control	SPBC21C3.14c	0.981971	-0.0262476	1.00099	0.00142743	0.987498	-0.0181497	1.00355	0.00511905	10	4.86895e-05	0.000387893	3.41129	0.00870896	FALSE
EMMphlox-Control	SPBC21C3.18	1.02599	0.0370216	1.04586	0.0646966	1.02481	0.035359	1.04147	0.0586278	10	0.0538742	0.0916794	1.03773	0.0373221	FALSE
EMMphlox-Control	SPBC25B2.04c	0.831394	-0.266396	0.847496	-0.238721	0.860598	-0.216589	0.87459	-0.19332	10	1.46988e-05	0.000184801	3.7333	0.0658069	TRUE
EMMphlox-Control	SPBC25H2.14	0.988162	-0.0171807	1.0073	0.0104944	0.992631	-0.0106704	1.00877	0.0125984	10	0.344785	0.435998	0.360515	0.0374131	FALSE
EMMphlox-Control	SPBC28F2.03	1.01134	0.016263	1.03092	0.043938	1.00874	0.0125535	1.02514	0.0358223	10	0.289064	0.381692	0.418287	0.03145	FALSE
EMMphlox-Control	SPBC2D10.03c	1.00141	0.00203582	1.02081	0.0297108	1.01345	0.0192807	1.02993	0.0425495	8	0.879367	0.909821	0.041044	0.0247382	FALSE
EMMphlox-Control	SPBC2D10.05	0.990818	-0.0133086	1.01001	0.0143664	0.986949	-0.0189518	1.003	0.00431695	10	0.375854	0.47031	0.327616	0.0307098	FALSE
EMMphlox-Control	SPBC2G2.06c	0.977056	-0.0334867	0.99598	-0.00581164	0.983766	-0.0236127	0.999762	-0.00034395	10	7.37378e-05	0.000534041	3.27243	0.0120971	FALSE
EMMphlox-Control	SPBC30D10.10c	0.92394	-0.114129	0.941835	-0.0864541	0.941216	-0.0874025	0.956519	-0.0641338	10	0.000524892	0.00224016	2.64972	0.0473402	TRUE
EMMphlox-Control	SPBC30D10.13c	0.632371	-0.661157	0.644619	-0.633482	0.639455	-0.645086	0.649852	-0.621817	10	7.46992e-12	1.78531e-09	8.74829	0.0342386	TRUE
EMMphlox-Control	SPBC31E1.01c	1.01223	0.0175364	1.03183	0.0452115	1.01352	0.0193797	1.03	0.0426484	10	0.0900518	0.142532	0.846087	0.0195505	FALSE
EMMphlox-Control	SPBC32F12.03c	0.995161	-0.00699876	1.01443	0.0206763	0.997911	-0.00301699	1.01414	0.0202518	10	0.432788	0.530443	0.275361	0.0170747	FALSE
EMMphlox-Control	SPBC32H8.03	0.984865	-0.0220022	1.00394	0.00567286	0.985148	-0.0215877	1.00117	0.00168109	10	0.0885941	0.14116	0.850288	0.0246233	FALSE
EMMphlox-Control	SPBC36.07	0.934104	-0.0983451	0.952196	-0.0706701	0.939485	-0.0900579	0.954761	-0.0667891	10	0.00102726	0.00377717	2.42283	0.0451331	TRUE
EMMphlox-Control	SPBC365.12c	1.03445	0.0488649	1.05449	0.0765399	1.02762	0.0393003	1.04432	0.0625691	9	0.0090631	0.0218796	1.65996	0.0308934	FALSE
EMMphlox-Control	SPBC365.20c	1.02121	0.0302809	1.04099	0.0579559	1.01606	0.0229847	1.03258	0.0462535	10	0.036208	0.0672715	1.17217	0.0272342	FALSE
EMMphlox-Control	SPBC3B8.02	0.969932	-0.0440443	0.988718	-0.0163692	0.969617	-0.0445128	0.985383	-0.0212441	10	0.0923077	0.145142	0.838208	0.051028	FALSE
EMMphlox-Control	SPBC3B8.08	0.983555	-0.0239228	1.0026	0.00375219	0.979506	-0.0298743	0.995432	-0.0066055	10	0.057197	0.0962682	1.01652	0.0234776	FALSE
EMMphlox-Control	SPBC3E7.07c	0.97887	-0.0308103	0.997829	-0.00313524	0.982612	-0.0253068	0.998588	-0.00203797	10	0.00085216	0.00328494	2.48347	0.0143176	FALSE
EMMphlox-Control	SPBC3H7.03c	0.887388	-0.172363	0.904575	-0.144688	0.899193	-0.153297	0.913814	-0.130028	10	0.000391261	0.00176437	2.75341	0.0668324	TRUE
EMMphlox-Control	SPBC3H7.10	0.873113	-0.195759	0.890024	-0.168084	0.883255	-0.179098	0.897617	-0.155829	10	0.000192354	0.00106913	2.97097	0.0683834	TRUE
EMMphlox-Control	SPBC409.07c	0.934845	-0.0972015	0.952951	-0.0695265	0.932738	-0.100456	0.947904	-0.0771875	10	7.40752e-07	1.96711e-05	4.70617	0.0213268	TRUE
EMMphlox-Control	SPBC428.08c	0.968812	-0.0457107	0.987576	-0.0180357	0.96687	-0.0486059	0.982591	-0.0253371	10	0.0119723	0.0275133	1.56046	0.0318908	FALSE
EMMphlox-Control	SPBC428.15	1.00733	0.0105428	1.02684	0.0382178	1.00661	0.00950323	1.02298	0.032772	10	0.249057	0.344072	0.46335	0.0174619	FALSE
EMMphlox-Control	SPBC4F6.08c	0.865388	-0.208581	0.882149	-0.180906	0.883438	-0.178798	0.897803	-0.15553	10	2.84248e-05	0.000251612	3.59927	0.0572184	TRUE
EMMphlox-Control	SPBC543.07	0.997288	-0.00391726	1.0166	0.0237578	0.994948	-0.00730646	1.01113	0.0159623	10	0.854161	0.899315	0.0460882	0.0454066	FALSE
EMMphlox-Control	SPBC646.09c	0.972745	-0.0398659	0.991586	-0.0121909	0.980203	-0.0288474	0.996141	-0.00557861	10	0.00529043	0.0143683	1.84259	0.0240709	FALSE
EMMphlox-Control	SPBC646.13	0.985593	-0.0209354	1.00468	0.00673958	0.985894	-0.0204948	1.00192	0.00277396	10	0.0727402	0.118265	0.927145	0.0218597	FALSE
EMMphlox-Control	SPBC649.04	0.990008	-0.0144886	1.00918	0.0131864	0.997252	-0.00396943	1.01347	0.0192994	10	0.0602889	0.100063	0.999727	0.0133195	FALSE
EMMphlox-Control	SPBC660.10	0.911109	-0.134305	0.928755	-0.10663	0.937705	-0.0927939	0.952952	-0.0695252	10	0.000934869	0.00349115	2.45703	0.0597758	TRUE
EMMphlox-Control	SPBC685.04c	0.971433	-0.041814	0.990247	-0.014139	0.968825	-0.0456918	0.984578	-0.022423	10	0.00176655	0.00583256	2.23414	0.0214279	FALSE
EMMphlox-Control	SPBC691.03c	0.966696	-0.0488653	0.985419	-0.0211903	0.984001	-0.0232688	1	0	10	0.0759146	0.122592	0.911539	0.0531531	FALSE
EMMphlox-Control	SPBC725.11c	0.946893	-0.0787261	0.965233	-0.0510511	0.948641	-0.0760653	0.964066	-0.0527966	10	2.40078e-05	0.000249473	3.60298	0.0238695	TRUE
EMMphlox-Control	SPBC776.01	0.96999	-0.0439577	0.988777	-0.0162827	0.975125	-0.0363411	0.99098	-0.0130723	10	0.00127641	0.00455318	2.34169	0.0215452	FALSE
EMMphlox-Control	SPBC947.05c	0.992603	-0.0107107	1.01183	0.0169643	0.996628	-0.00487308	1.01283	0.0183957	10	0.231782	0.325858	0.486972	0.0168297	FALSE
EMMphlox-Control	SPBC947.09	0.987359	-0.0183532	1.00648	0.00932184	1.00013	0.000193309	1.0164	0.0234621	10	0.130506	0.196169	0.70737	0.0233843	FALSE
EMMphlox-Control	SPBC9B6.03	1.0328	0.0465653	1.05281	0.0742403	1.04063	0.0574531	1.05755	0.0807219	10	0.0173413	0.0376779	1.42391	0.0361374	FALSE
EMMphlox-Control	SPBP22H7.04	0.950404	-0.0733872	0.968811	-0.0457121	0.952358	-0.0704238	0.967843	-0.047155	10	3.6359e-05	0.000299648	3.52339	0.0233572	TRUE
EMMphlox-Control	SPBP35G2.11c	1.00597	0.00858957	1.02546	0.0362646	1.00911	0.0130849	1.02552	0.0363537	10	0.382146	0.473853	0.324357	0.0192661	FALSE
EMMphlox-Control	SPBP8B7.27	1.01421	0.0203497	1.03385	0.0480247	1.01892	0.0270438	1.03549	0.0503126	10	0.0200874	0.0424857	1.37176	0.0152794	FALSE
EMMphlox-Control	SPBP8B7.31	1.0214	0.0305525	1.04119	0.0582275	1.01728	0.0247127	1.03382	0.0479815	10	0.0349871	0.0658419	1.1815	0.0272611	FALSE
EMMphlox-Control	SPBPB21E7.04c	1.02409	0.0343483	1.04393	0.0620233	1.0324	0.0460005	1.04919	0.0692693	9	0.0129859	0.0290059	1.53751	0.0230583	FALSE
EMMphlox-Control	SPBPJ4664.05	0.984614	-0.0223692	1.00368	0.00530581	0.98397	-0.0233135	0.999969	-4.4696e-05	10	0.0116475	0.0270268	1.56821	0.0149651	FALSE
EMMphlox-Control	SPCC1020.08	0.998666	-0.00192551	1.01801	0.0257495	0.998411	-0.0022937	1.01465	0.0209751	10	0.780439	0.836434	0.0775681	0.0122196	FALSE
EMMphlox-Control	SPCC1235.03	0.987556	-0.0180651	1.00668	0.0096099	0.989307	-0.0155092	1.00539	0.00775958	10	0.054087	0.0916794	1.03773	0.01689	FALSE
EMMphlox-Control	SPCC1259.02c	1.00156	0.00225595	1.02096	0.029931	1.01192	0.0171015	1.02838	0.0403703	10	0.865577	0.903376	0.0441317	0.0276595	FALSE
EMMphlox-Control	SPCC126.12	1.00016	0.000234699	1.01953	0.0279097	1.00286	0.00411467	1.01916	0.0273834	10	0.977617	0.994257	0.00250129	0.0159935	FALSE
EMMphlox-Control	SPCC1393.13	0.95227	-0.0705574	0.970714	-0.0428824	0.963051	-0.054316	0.97871	-0.0310472	10	0.00463607	0.0131907	1.87973	0.0413064	FALSE
EMMphlox-Control	SPCC13B11.01	0.951333	-0.071977	0.969759	-0.044302	0.952328	-0.0704693	0.967813	-0.0472005	10	0.0193863	0.041369	1.38332	0.0550904	TRUE
EMMphlox-Control	SPCC1494.08c	0.932821	-0.100327	0.950888	-0.072652	0.938458	-0.0916364	0.953716	-0.0683676	10	1.79347e-05	0.000204114	3.69013	0.0285836	TRUE
EMMphlox-Control	SPCC162.12	0.999572	-0.000617881	1.01893	0.0270571	0.992906	-0.0102709	1.00905	0.0129979	10	0.965553	0.986185	0.00604176	0.0298733	FALSE
EMMphlox-Control	SPCC1620.03	1.00882	0.012663	1.02835	0.040338	1.01161	0.0166543	1.02806	0.0399231	10	0.296744	0.389681	0.409291	0.024377	FALSE
EMMphlox-Control	SPCC16A11.08	1.0298	0.0423601	1.04974	0.0700351	1.03545	0.050256	1.05228	0.0735248	10	0.00737594	0.0185563	1.73151	0.0278716	FALSE
EMMphlox-Control	SPCC16C4.11	0.934561	-0.0976387	0.952662	-0.0699637	0.946721	-0.0789889	0.962114	-0.0557201	10	0.000240034	0.00120952	2.91739	0.0370267	TRUE
EMMphlox-Control	SPCC1753.02c	0.873133	-0.195726	0.890044	-0.168051	0.878688	-0.186578	0.892975	-0.163309	10	5.79841e-09	4.6194e-07	6.33541	0.0252593	TRUE
EMMphlox-Control	SPCC188.02	1.00016	0.00022731	1.01953	0.0279023	1.00693	0.00996086	1.0233	0.0332296	10	0.991035	0.997239	0.0012009	0.0431229	FALSE
EMMphlox-Control	SPCC18B5.03	1.00012	0.000176508	1.01949	0.0278515	1.00947	0.0136008	1.02589	0.0368695	10	0.989367	0.997239	0.0012009	0.0274697	FALSE
EMMphlox-Control	SPCC24B10.18	0.980902	-0.0278193	0.9999	-0.000144311	0.985814	-0.0206133	1.00184	0.0026555	10	2.78235e-05	0.000251612	3.59927	0.00892817	FALSE
EMMphlox-Control	SPCC320.03	1.04106	0.0580562	1.06123	0.0857312	1.04819	0.0678971	1.06523	0.0911658	10	0.0303355	0.0586701	1.23158	0.0513276	FALSE
EMMphlox-Control	SPCC320.07c	1.02712	0.0386103	1.04702	0.0662853	1.02777	0.0395241	1.04449	0.0627929	10	0.00547079	0.0146912	1.83294	0.0240852	FALSE
EMMphlox-Control	SPCC338.04	1.01003	0.0143997	1.02959	0.0420747	1.01234	0.0176871	1.0288	0.0409558	10	0.0529434	0.0910321	1.04081	0.0128185	FALSE
EMMphlox-Control	SPCC4B3.03c	1.0292	0.0415205	1.04913	0.0691955	1.01863	0.0266312	1.03519	0.0499	10	0.0262783	0.0519051	1.28479	0.0351225	FALSE
EMMphlox-Control	SPCC4B3.12	1.00549	0.00790569	1.02497	0.0355807	1.00923	0.0132493	1.02564	0.0365181	10	0.691158	0.76831	0.114464	0.0423225	FALSE
EMMphlox-Control	SPCC4G3.09c	0.977283	-0.033151	0.996212	-0.00547599	0.978621	-0.0311784	0.994533	-0.00790957	10	0.0626442	0.103255	0.986089	0.0339042	FALSE
EMMphlox-Control	SPCC4G3.12c	0.944469	-0.0824241	0.962762	-0.054749	0.950318	-0.073518	0.965769	-0.0502492	8	0.00527186	0.0143683	1.84259	0.0405696	TRUE
EMMphlox-Control	SPCC4G3.17	1.01391	0.0199263	1.03355	0.0476013	1.01457	0.0208665	1.03106	0.0441353	10	0.0431788	0.0779978	1.10792	0.0180153	FALSE
EMMphlox-Control	SPCC553.01c	0.951551	-0.0716465	0.969981	-0.0439715	0.975182	-0.0362565	0.991038	-0.0129877	10	0.0695289	0.113818	0.94379	0.0755715	FALSE
EMMphlox-Control	SPCC5E4.10c	0.980187	-0.0288708	0.999171	-0.00119579	0.985545	-0.0210057	1.00157	0.00226305	10	0.0455542	0.0800548	1.09661	0.0268901	FALSE
EMMphlox-Control	SPCC613.03	0.991408	-0.0124487	1.01061	0.0152263	0.990319	-0.0140341	1.00642	0.00923465	9	0.259112	0.355907	0.448663	0.0203395	FALSE
EMMphlox-Control	SPCC622.11	0.996058	-0.00569849	1.01535	0.0219765	0.998135	-0.00269299	1.01436	0.0205758	8	0.580879	0.658957	0.181143	0.0181894	FALSE
EMMphlox-Control	SPCC63.03	0.983856	-0.0234813	1.00291	0.00419371	0.986004	-0.0203342	1.00204	0.0029346	10	0.11769	0.181471	0.741194	0.0292343	FALSE
EMMphlox-Control	SPCC63.06	0.951738	-0.0713642	0.970171	-0.0436892	0.958102	-0.0617484	0.97368	-0.0384796	10	0.000914772	0.00347033	2.45963	0.032777	FALSE
EMMphlox-Control	SPCC663.06c	0.990981	-0.0130711	1.01017	0.0146039	0.989248	-0.0155953	1.00533	0.00767353	10	0.52486	0.608939	0.215426	0.0431502	FALSE
EMMphlox-Control	SPCC736.13	0.985786	-0.0206529	1.00488	0.00702212	0.989971	-0.0145418	1.00607	0.00872701	10	0.0246293	0.0490534	1.30933	0.0160243	FALSE
EMMphlox-Control	SPCC794.03	1.02421	0.0345147	1.04405	0.0621897	1.02161	0.0308492	1.03822	0.054118	10	0.0242238	0.0489912	1.30988	0.0284447	FALSE
EMMphlox-Control	SPCC962.05	1.03367	0.0477794	1.05369	0.0754544	1.03146	0.0446921	1.04823	0.0679609	10	0.00276199	0.00846303	2.07247	0.0269064	FALSE
EMMphlox-Control	SPCC965.12	1.04135	0.0584535	1.06152	0.0861285	1.04173	0.0589826	1.05867	0.0822514	10	0.000633539	0.00265642	2.5757	0.0269128	FALSE
EMMphlox-Control	SPCP31B10.02	1.00314	0.00452141	1.02257	0.0321964	1.00213	0.00307176	1.01843	0.0263405	10	0.730555	0.794551	0.0998781	0.027169	FALSE

## Sheet: viability_benign
condition_short	strain_id	mean_effect_size	mean_effect_size_log2	mean_fitness	mean_fitness_log2	median_effect_size	median_effect_size_log2	median_fitness	median_fitness_log2	observation_count	p_Welch	p_Welch_BH	p_Welch_BH_-log10	stdev_fitness	is_hit
YESphlox-Control	972	1	0	1.00572	0.00822832	1	0	1.00469	0.00674414	548	1	1	0	0.0089078	FALSE
YESphlox-Control	SPAC105.02c	0.996229	-0.0054503	1.00193	0.00277802	0.998413	-0.00229198	1.00309	0.00445215	50	4.72981e-05	5.68053e-05	4.24561	0.0055889	FALSE
YESphlox-Control	SPAC1071.07c	1.12574	0.170876	1.13218	0.179105	1.13299	0.180138	1.1383	0.186882	50	2.10884e-25	1.07237e-24	23.9697	0.0444435	TRUE
YESphlox-Control	SPAC1071.09c	0.990763	-0.0133885	0.99643	-0.00516022	0.990051	-0.0144252	0.99469	-0.00768104	48	7.80953e-11	1.111e-10	9.95429	0.00768838	FALSE
YESphlox-Control	SPAC10F6.14c	0.988256	-0.0170435	0.993908	-0.00881514	0.990191	-0.0142216	0.99483	-0.00747743	50	4.53526e-19	1.12909e-18	17.9473	0.00622363	FALSE
YESphlox-Control	SPAC11E3.12	0.998624	-0.00198608	1.00434	0.00624224	0.998734	-0.00182807	1.00341	0.00491606	47	0.409697	0.420247	0.376496	0.0111087	FALSE
YESphlox-Control	SPAC12G12.11c	0.992615	-0.0106944	0.998292	-0.00246611	0.994048	-0.00861188	0.998706	-0.00186774	49	1.56186e-21	5.1845e-21	20.2853	0.00351699	FALSE
YESphlox-Control	SPAC13A11.06	0.992272	-0.0111919	0.997948	-0.00296356	0.992915	-0.0102581	0.997567	-0.00351392	50	1.37885e-17	2.99587e-17	16.5235	0.00442429	FALSE
YESphlox-Control	SPAC13F5.03c	0.992582	-0.0107422	0.998259	-0.00251384	0.993631	-0.00921782	0.998287	-0.00247369	50	2.08957e-14	3.59286e-14	13.4446	0.00499707	FALSE
YESphlox-Control	SPAC13F5.04c	0.990696	-0.0134861	0.996362	-0.00525783	0.990249	-0.0141371	0.994889	-0.00739293	42	1.39077e-06	1.74944e-06	5.7571	0.0106404	FALSE
YESphlox-Control	SPAC140.01	0.982164	-0.0259646	0.987781	-0.0177363	0.9822	-0.0259109	0.986802	-0.0191668	50	1.9616e-08	2.59018e-08	7.58667	0.018891	TRUE
YESphlox-Control	SPAC1556.02c	0.985606	-0.0209165	0.991244	-0.0126881	0.9885	-0.0166878	0.993131	-0.00994363	50	2.28662e-16	4.59245e-16	15.338	0.0086553	FALSE
YESphlox-Control	SPAC15A10.10	0.992373	-0.0110462	0.998049	-0.00281791	0.992852	-0.0103499	0.997504	-0.00360581	50	5.02069e-17	1.04343e-16	15.9815	0.00448319	FALSE
YESphlox-Control	SPAC16.01	0.984294	-0.0228391	0.989924	-0.0146107	0.986199	-0.0200493	0.99082	-0.0133052	50	4.58695e-27	2.81098e-26	25.5511	0.0059076	FALSE
YESphlox-Control	SPAC1610.02c	1.14577	0.196322	1.15233	0.204551	1.15136	0.203341	1.15676	0.210085	50	9.4821e-29	9.44259e-28	27.0249	0.0433939	TRUE
YESphlox-Control	SPAC1687.14c	0.996952	-0.00440351	1.00265	0.00382481	0.998381	-0.00233749	1.00306	0.00440664	50	7.70307e-05	9.15937e-05	4.03813	0.00448378	FALSE
YESphlox-Control	SPAC1687.15	0.995096	-0.00709284	1.00079	0.00113548	0.99667	-0.00481239	1.00134	0.00193175	50	1.01103e-07	1.30614e-07	6.88401	0.00529116	FALSE
YESphlox-Control	SPAC16E8.01	1.02639	0.0375854	1.03227	0.0458138	1.0258	0.0367435	1.0306	0.0434876	50	8.60582e-10	1.1889e-09	8.92486	0.0247663	TRUE
YESphlox-Control	SPAC1705.02	0.98998	-0.0145288	0.995642	-0.00630043	0.990982	-0.0130697	0.995625	-0.00632554	48	2.19579e-11	3.18056e-11	10.4975	0.00801272	FALSE
YESphlox-Control	SPAC17A2.02c	1.00296	0.00426509	1.0087	0.0124934	1.00103	0.00148003	1.00572	0.00822417	50	0.191299	0.199652	0.699726	0.0156733	FALSE
YESphlox-Control	SPAC17A5.16	1.00288	0.00414669	1.00861	0.012375	1.00374	0.00539064	1.00845	0.0121348	50	0.00862182	0.00976594	2.01029	0.00705811	FALSE
YESphlox-Control	SPAC17H9.04c	1.04888	0.0688478	1.05488	0.0770761	1.0545	0.0765636	1.05944	0.0833078	50	1.77338e-19	4.84537e-19	18.3147	0.0239711	TRUE
YESphlox-Control	SPAC17H9.06c	0.988529	-0.0166446	0.994183	-0.00841625	0.989925	-0.0146083	0.994564	-0.0078642	50	1.26296e-38	7.54619e-37	36.1223	0.003377	FALSE
YESphlox-Control	SPAC1805.07c	1.08581	0.118768	1.09202	0.126997	1.09187	0.126799	1.09698	0.133543	50	1.68279e-21	5.50941e-21	20.2589	0.0374186	TRUE
YESphlox-Control	SPAC1834.04	0.992793	-0.0104358	0.998471	-0.00220744	0.993625	-0.00922629	0.998281	-0.00248215	50	2.40677e-08	3.16054e-08	7.50024	0.00755763	FALSE
YESphlox-Control	SPAC1834.09	0.989101	-0.0158108	0.994758	-0.00758247	0.990713	-0.013461	0.995355	-0.0067169	50	1.95657e-21	6.23494e-21	20.2052	0.00524817	FALSE
YESphlox-Control	SPAC186.06	0.993111	-0.00997328	0.998791	-0.00174496	0.994018	-0.0086563	0.998675	-0.00191216	50	6.6287e-16	1.24745e-15	14.904	0.00425838	FALSE
YESphlox-Control	SPAC18B11.04	0.991706	-0.0120163	0.997378	-0.00378796	0.99263	-0.0106718	0.997281	-0.0039277	50	1.90336e-19	5.11128e-19	18.2915	0.00437682	FALSE
YESphlox-Control	SPAC19B12.07c	0.976093	-0.0349095	0.981676	-0.0266811	0.978243	-0.0317352	0.982827	-0.0249911	50	6.51553e-28	4.71882e-27	26.3262	0.00819492	TRUE
YESphlox-Control	SPAC19G12.15c	1.05578	0.0783136	1.06182	0.0865419	1.04196	0.0593002	1.04684	0.0660443	49	1.70728e-09	2.33165e-09	8.63234	0.0529581	TRUE
YESphlox-Control	SPAC1A6.04c	0.992954	-0.0102006	0.998634	-0.00197233	0.994256	-0.00831062	0.998915	-0.00156648	50	2.60789e-18	6.11065e-18	17.2139	0.00388268	FALSE
YESphlox-Control	SPAC1B9.02c	0.984208	-0.0229642	0.989838	-0.0147358	0.985247	-0.0214428	0.989863	-0.0146987	50	2.43134e-25	1.21061e-24	23.917	0.00630697	FALSE
YESphlox-Control	SPAC1D4.03c	0.99057	-0.0136697	0.996235	-0.00544141	0.991221	-0.0127208	0.995866	-0.00597662	49	3.30002e-09	4.43092e-09	8.35351	0.00910181	FALSE
YESphlox-Control	SPAC1F3.09	0.99116	-0.0128107	0.996829	-0.00458235	0.991996	-0.0115931	0.996645	-0.00484895	50	1.46331e-19	4.1145e-19	18.3857	0.00464029	FALSE
YESphlox-Control	SPAC1F8.06	0.984388	-0.0227006	0.990019	-0.0144722	0.984007	-0.0232594	0.988618	-0.0165153	48	2.68004e-14	4.51078e-14	13.3457	0.0102256	TRUE
YESphlox-Control	SPAC20G4.05c	0.9978	-0.00317804	1.00351	0.00505028	0.998665	-0.00192727	1.00334	0.00481686	50	0.00139707	0.00161304	2.79235	0.00393284	FALSE
YESphlox-Control	SPAC20H4.03c	0.989906	-0.0146364	0.995568	-0.00640805	0.990528	-0.0137298	0.99517	-0.00698561	50	3.50161e-12	5.19804e-12	11.2842	0.00786217	FALSE
YESphlox-Control	SPAC21E11.04	0.990842	-0.0132734	0.996509	-0.00504505	0.991455	-0.0123802	0.996101	-0.00563609	50	2.55327e-32	8.71758e-31	30.0596	0.00318174	FALSE
YESphlox-Control	SPAC227.17c	1.13992	0.188934	1.14644	0.197162	1.14202	0.191586	1.14737	0.19833	50	1.50416e-29	2.56782e-28	27.5904	0.0400405	TRUE
YESphlox-Control	SPAC22A12.06c	0.996008	-0.00577085	1.0017	0.00245747	0.997019	-0.00430647	1.00169	0.00243767	45	0.000651069	0.000755366	3.12184	0.00700955	FALSE
YESphlox-Control	SPAC22A12.14c	0.993312	-0.00968088	0.998994	-0.00145256	0.994023	-0.00864831	0.998681	-0.00190417	50	1.82843e-16	3.70334e-16	15.4314	0.00400692	FALSE
YESphlox-Control	SPAC22E12.14c	0.988428	-0.0167919	0.994082	-0.00856357	0.988269	-0.0170249	0.992899	-0.0102808	50	2.65087e-20	7.8217e-20	19.1067	0.00581308	FALSE
YESphlox-Control	SPAC22F3.04	0.996795	-0.00463065	1.0025	0.00359768	0.99747	-0.003655	1.00214	0.00308913	49	7.98316e-08	1.03694e-07	6.98425	0.00297392	FALSE
YESphlox-Control	SPAC23A1.06c	0.991985	-0.0116101	0.997659	-0.00338178	0.992712	-0.0105527	0.997364	-0.00380858	50	4.39656e-17	9.21735e-17	16.0354	0.00470452	FALSE
YESphlox-Control	SPAC23C11.08	0.989065	-0.0158628	0.994722	-0.0076345	0.990091	-0.0143673	0.99473	-0.00762317	50	2.02066e-14	3.49954e-14	13.456	0.00738974	FALSE
YESphlox-Control	SPAC23C4.09c	0.97718	-0.0333038	0.982769	-0.0250755	0.97861	-0.0311941	0.983195	-0.0244499	50	4.49499e-40	3.58101e-38	37.446	0.00546265	TRUE
YESphlox-Control	SPAC23D3.03c	0.995177	-0.00697435	1.00087	0.00125397	0.995648	-0.00629227	1.00031	0.000451866	50	0.000124958	0.000146397	3.83447	0.0079232	FALSE
YESphlox-Control	SPAC23D3.04c	1.12619	0.171446	1.13263	0.179674	1.13906	0.187841	1.1444	0.194585	50	1.62247e-24	6.92446e-24	23.1596	0.0467095	TRUE
YESphlox-Control	SPAC23G3.05c	0.99185	-0.0118065	0.997523	-0.00357817	0.993052	-0.0100594	0.997705	-0.00331526	50	8.12481e-13	1.25279e-12	11.9021	0.00606473	FALSE
YESphlox-Control	SPAC23H4.09	0.992369	-0.0110509	0.998045	-0.0028226	0.993089	-0.0100057	0.997742	-0.00326156	49	9.10543e-16	1.70015e-15	14.7695	0.0047077	FALSE
YESphlox-Control	SPAC24H6.04	0.991129	-0.0128554	0.996798	-0.00462706	0.991402	-0.0124584	0.996047	-0.00571429	50	9.53785e-18	2.13042e-17	16.6715	0.00504756	FALSE
YESphlox-Control	SPAC25A8.03c	0.993979	-0.00871237	0.999665	-0.000484055	0.995258	-0.00685816	0.999921	-0.000114021	50	2.40627e-14	4.10784e-14	13.3864	0.00399621	FALSE
YESphlox-Control	SPAC25B8.08	0.998479	-0.00219587	1.00419	0.00603245	0.999471	-0.000763041	1.00415	0.00598109	49	0.0666934	0.0711595	1.14777	0.00510323	FALSE
YESphlox-Control	SPAC26F1.10c	0.992516	-0.010837	0.998193	-0.00260873	0.991201	-0.0127507	0.995845	-0.00600653	50	0.000121001	0.000142459	3.84631	0.0125496	FALSE
YESphlox-Control	SPAC26F1.12c	0.993591	-0.00927551	0.999274	-0.00104719	0.994936	-0.00732427	0.999598	-0.000580136	50	2.69445e-16	5.36644e-16	15.2703	0.00385468	FALSE
YESphlox-Control	SPAC27E2.03c	1.13422	0.181704	1.14071	0.189932	1.13996	0.188984	1.1453	0.195728	50	5.28522e-31	1.30696e-29	28.8837	0.0357753	TRUE
YESphlox-Control	SPAC29A4.20	1.14487	0.195179	1.15141	0.203407	1.14943	0.200916	1.15481	0.20766	50	3.76538e-29	4.49962e-28	27.3468	0.0422699	TRUE
YESphlox-Control	SPAC2F3.18c	0.976888	-0.0337346	0.982476	-0.0255063	0.978509	-0.0313431	0.983094	-0.024599	50	2.72052e-27	1.71107e-26	25.7667	0.00815008	TRUE
YESphlox-Control	SPAC32A11.03c	1.00105	0.00150894	1.00677	0.00973726	0.999073	-0.00133828	1.00375	0.00540585	50	0.524654	0.533585	0.272797	0.0113069	FALSE
YESphlox-Control	SPAC3A11.02	0.994442	-0.00804087	1.00013	0.000187455	0.995533	-0.00645878	1.0002	0.000285355	50	1.63548e-12	2.47392e-12	11.6066	0.00408708	FALSE
YESphlox-Control	SPAC3A11.10c	0.975668	-0.0355383	0.981248	-0.02731	0.976794	-0.0338743	0.98137	-0.0271302	50	5.85364e-25	2.74318e-24	23.5617	0.00937663	TRUE
YESphlox-Control	SPAC3A11.11c	0.991311	-0.0125904	0.996981	-0.00436213	0.99211	-0.0114285	0.996758	-0.00468439	48	2.78649e-25	1.35913e-24	23.8667	0.0035787	FALSE
YESphlox-Control	SPAC3A12.03c	0.996229	-0.00545009	1.00193	0.00277823	0.996956	-0.00439897	1.00163	0.00234517	46	0.0110042	0.0123474	1.90842	0.00940583	FALSE
YESphlox-Control	SPAC3A12.13c	1.13424	0.18172	1.14072	0.189948	1.13874	0.187432	1.14407	0.194176	50	6.75809e-29	7.34175e-28	27.1342	0.0397006	TRUE
YESphlox-Control	SPAC3G6.03c	0.993608	-0.00925115	0.999291	-0.00102283	0.995548	-0.00643734	1.00021	0.000306792	50	9.84309e-18	2.17824e-17	16.6619	0.00357976	FALSE
YESphlox-Control	SPAC3G6.05	1.03314	0.0470329	1.03905	0.0552612	0.989601	-0.015081	0.994238	-0.00833691	49	0.197482	0.205209	0.687803	0.178493	FALSE
YESphlox-Control	SPAC3G9.11c	0.989112	-0.0157938	0.99477	-0.00756546	0.99004	-0.0144413	0.994679	-0.00769713	50	7.57893e-20	2.18237e-19	18.6611	0.00559867	FALSE
YESphlox-Control	SPAC3H1.03	0.987609	-0.0179881	0.993258	-0.00975975	0.98865	-0.0164689	0.993282	-0.00972481	50	6.82635e-19	1.68196e-18	17.7742	0.00660037	FALSE
YESphlox-Control	SPAC3H1.08c	0.990071	-0.0143959	0.995734	-0.00616761	0.991211	-0.0127364	0.995855	-0.00599231	50	2.28925e-19	6.01243e-19	18.2209	0.00523669	FALSE
YESphlox-Control	SPAC3H1.11	0.991463	-0.0123694	0.997134	-0.00414112	0.992039	-0.0115312	0.996687	-0.00478703	50	2.11651e-23	8.29255e-23	22.0813	0.0038683	FALSE
YESphlox-Control	SPAC3H5.08c	1.01996	0.0285142	1.0258	0.0367425	1.02129	0.0303979	1.02608	0.037142	50	4.94813e-13	7.78029e-13	12.109	0.0146475	TRUE
YESphlox-Control	SPAC3H5.09c	0.995528	-0.00646563	1.00122	0.00176269	0.996677	-0.00480262	1.00135	0.00194151	50	3.18197e-12	4.75307e-12	11.323	0.00317285	FALSE
YESphlox-Control	SPAC3H5.10	1.10409	0.142853	1.1104	0.151081	1.10651	0.146019	1.1117	0.152763	50	5.44557e-22	1.85927e-21	20.7307	0.0441393	TRUE
YESphlox-Control	SPAC3H8.03	0.990316	-0.0140397	0.99598	-0.00581141	0.991296	-0.0126129	0.99594	-0.00586876	50	2.24687e-22	7.89708e-22	21.1025	0.0045327	FALSE
YESphlox-Control	SPAC3H8.04	0.995792	-0.0060838	1.00149	0.00214452	0.996558	-0.00497404	1.00123	0.0017701	50	3.24622e-09	4.38332e-09	8.3582	0.00378301	FALSE
YESphlox-Control	SPAC4G9.11c	0.996632	-0.0048667	1.00233	0.00336162	0.997497	-0.00361593	1.00217	0.00312821	50	4.49089e-08	5.86515e-08	7.23172	0.00314457	FALSE
YESphlox-Control	SPAC4G9.14	0.991655	-0.0120897	0.997327	-0.00386141	0.992805	-0.0104171	0.997457	-0.00367297	50	5.96927e-14	9.70513e-14	13.013	0.00579417	FALSE
YESphlox-Control	SPAC4H3.04c	0.987892	-0.0175753	0.993542	-0.00934695	0.989238	-0.0156111	0.993873	-0.00886693	50	1.2784e-15	2.36851e-15	14.6255	0.00762595	FALSE
YESphlox-Control	SPAC4H3.06	0.996795	-0.0046306	1.0025	0.00359772	0.99695	-0.00440689	1.00162	0.00233724	50	1.92167e-07	2.45603e-07	6.60977	0.00316829	FALSE
YESphlox-Control	SPAC4H3.07c	0.994328	-0.00820576	1.00002	2.25565e-05	0.996174	-0.00553066	1.00084	0.00121347	50	0.000169349	0.000197436	3.70457	0.0096485	FALSE
YESphlox-Control	SPAC521.03	0.993669	-0.00916278	0.999352	-0.000934464	0.99502	-0.00720225	0.999683	-0.000458119	50	2.53316e-14	4.29379e-14	13.3672	0.00423417	FALSE
YESphlox-Control	SPAC56F8.02	1.00152	0.0021968	1.00725	0.0104251	1.00396	0.00570109	1.00866	0.0124452	45	0.458967	0.468774	0.329036	0.0135303	FALSE
YESphlox-Control	SPAC57A7.09	0.988656	-0.0164601	0.99431	-0.00823181	0.989894	-0.0146547	0.994532	-0.00791056	50	1.36649e-23	5.53542e-23	22.2568	0.0050181	FALSE
YESphlox-Control	SPAC589.07c	0.990944	-0.0131249	0.996612	-0.00489657	0.992638	-0.0106611	0.997289	-0.00391696	50	4.19753e-17	8.87797e-17	16.0517	0.00531259	FALSE
YESphlox-Control	SPAC5H10.06c	0.992628	-0.0106745	0.998306	-0.00244621	0.993774	-0.00901064	0.99843	-0.0022665	50	4.19373e-14	6.86507e-14	13.1634	0.00505156	FALSE
YESphlox-Control	SPAC637.07	1.14239	0.192061	1.14893	0.200289	1.15011	0.201777	1.1555	0.208522	50	7.29249e-30	1.45242e-28	27.8379	0.0401096	TRUE
YESphlox-Control	SPAC652.01	0.992058	-0.0115042	0.997732	-0.00327588	0.993543	-0.00934534	0.998199	-0.0026012	47	3.63006e-12	5.35545e-12	11.2712	0.00589539	FALSE
YESphlox-Control	SPAC683.02c	0.992353	-0.0110743	0.998029	-0.00284598	0.993094	-0.00999825	0.997747	-0.00325412	50	1.84642e-20	5.51618e-20	19.2584	0.00386312	FALSE
YESphlox-Control	SPAC688.03c	0.994025	-0.00864634	0.99971	-0.000418022	0.994818	-0.00749614	0.999479	-0.000752001	50	1.53016e-07	1.96618e-07	6.70638	0.00671355	FALSE
YESphlox-Control	SPAC688.13	0.996038	-0.00572795	1.00173	0.00250037	0.997318	-0.00387449	1.00199	0.00286965	50	3.1905e-06	3.97151e-06	5.40104	0.0049486	FALSE
YESphlox-Control	SPAC694.02	0.988073	-0.0173098	0.993725	-0.0090815	0.990012	-0.0144825	0.994651	-0.00773839	50	2.60554e-18	6.11065e-18	17.2139	0.00654281	FALSE
YESphlox-Control	SPAC694.04c	0.992407	-0.0109961	0.998083	-0.00276776	0.993459	-0.00946798	0.998114	-0.00272385	49	1.1349e-22	4.17294e-22	21.3796	0.00346999	FALSE
YESphlox-Control	SPAC694.06c	1.00939	0.0134803	1.01516	0.0217086	1.01164	0.0167022	1.01638	0.0234463	50	8.28969e-07	1.04827e-06	5.97953	0.0116911	FALSE
YESphlox-Control	SPAC6F12.02	0.997076	-0.00422446	1.00278	0.00400386	0.999812	-0.000270781	1.0045	0.00647335	49	0.101892	0.106807	0.971398	0.0120746	FALSE
YESphlox-Control	SPAC6F6.13c	0.991171	-0.0127937	0.996841	-0.00456537	0.992029	-0.0115453	0.996678	-0.00480112	44	5.6785e-16	1.09448e-15	14.9608	0.0049676	FALSE
YESphlox-Control	SPAC6G10.10c	0.99045	-0.0138441	0.996115	-0.00561574	0.991447	-0.0123918	0.996093	-0.00564762	48	4.54076e-18	1.03356e-17	16.9857	0.00517581	FALSE
YESphlox-Control	SPAC7D4.05	0.99225	-0.0112239	0.997926	-0.00299554	0.99316	-0.00990233	0.997813	-0.0031582	50	6.82277e-26	3.88248e-25	24.4109	0.00322307	FALSE
YESphlox-Control	SPAC806.04c	0.991402	-0.0124574	0.997073	-0.00422911	0.992373	-0.0110458	0.997023	-0.00430169	50	1.66244e-15	3.033e-15	14.5181	0.00547217	FALSE
YESphlox-Control	SPAC806.07	0.99098	-0.0130723	0.996648	-0.004844	0.991482	-0.012342	0.996127	-0.00559783	50	2.84204e-18	6.59463e-18	17.1808	0.00500824	FALSE
YESphlox-Control	SPAC821.05	1.12544	0.170486	1.13187	0.178714	1.13164	0.178418	1.13694	0.185162	50	1.37159e-28	1.26081e-27	26.8994	0.0377029	TRUE
YESphlox-Control	SPAC821.07c	0.990867	-0.013237	0.996534	-0.00500869	0.991727	-0.0119856	0.996373	-0.00524148	50	3.77565e-14	6.26653e-14	13.203	0.00627502	FALSE
YESphlox-Control	SPAC823.09c	0.989323	-0.0154871	0.994981	-0.00725879	0.990177	-0.0142422	0.994816	-0.00749806	50	9.45768e-26	5.04217e-25	24.2974	0.00441389	FALSE
YESphlox-Control	SPAC823.16c	0.991841	-0.0118193	0.997514	-0.00359102	0.992306	-0.0111431	0.996955	-0.00439901	49	6.02747e-16	1.14331e-15	14.9418	0.00499473	FALSE
YESphlox-Control	SPAC890.03	0.994519	-0.00792941	1.00021	0.000298915	0.996153	-0.00556035	1.00082	0.00118379	50	2.80382e-06	3.50844e-06	5.45489	0.00709101	FALSE
YESphlox-Control	SPAC8C9.06c	1.00857	0.0123183	1.01434	0.0205466	0.997108	-0.00417783	1.00178	0.00256631	44	0.0962651	0.101354	0.994159	0.0335544	FALSE
YESphlox-Control	SPAC8C9.16c	0.990767	-0.0133825	0.996434	-0.00515414	0.991982	-0.0116142	0.99663	-0.00487007	50	1.31762e-19	3.74894e-19	18.4261	0.00483228	FALSE
YESphlox-Control	SPAC8F11.03	0.987935	-0.0175123	0.993585	-0.00928399	0.988875	-0.0161401	0.993508	-0.00939596	49	7.89249e-24	3.25225e-23	22.4878	0.00516722	FALSE
YESphlox-Control	SPAC977.15	0.985899	-0.0204886	0.991538	-0.0122603	0.98698	-0.0189075	0.991604	-0.0121633	50	9.88686e-28	6.94988e-27	26.158	0.00527642	FALSE
YESphlox-Control	SPACUNK4.13c	0.992625	-0.0106786	0.998303	-0.00245027	0.994056	-0.00860146	0.998713	-0.00185732	50	2.06598e-21	6.41259e-21	20.193	0.00358093	FALSE
YESphlox-Control	SPACUNK4.16c	0.990158	-0.0142697	0.995821	-0.00604135	0.991291	-0.0126196	0.995936	-0.00587548	45	4.00067e-14	6.59421e-14	13.1808	0.00624373	FALSE
YESphlox-Control	SPACUNK4.17	0.989264	-0.0155721	0.994923	-0.00734377	0.988555	-0.0166064	0.993187	-0.00986224	50	5.71215e-13	8.86496e-13	12.0523	0.00793745	FALSE
YESphlox-Control	SPAP14E8.05c	0.990187	-0.0142265	0.995851	-0.0059982	0.991412	-0.0124431	0.996058	-0.005699	50	3.81291e-33	1.51881e-31	30.8185	0.00332762	FALSE
YESphlox-Control	SPAP27G11.12	0.981813	-0.0264796	0.987429	-0.0182512	0.982064	-0.0261115	0.986665	-0.0193674	50	1.39669e-25	7.25672e-25	24.1393	0.00706664	TRUE
YESphlox-Control	SPAP8A3.04c	0.989574	-0.0151206	0.995234	-0.00689229	0.99072	-0.013451	0.995362	-0.00670682	50	3.4908e-31	1.04288e-29	28.9818	0.00369315	FALSE
YESphlox-Control	SPAPB1A11.02	0.990357	-0.0139797	0.996021	-0.00575133	0.991731	-0.0119798	0.996377	-0.00523568	50	3.51109e-22	1.21616e-21	20.915	0.00454715	FALSE
YESphlox-Control	SPAPB1E7.11c	0.991501	-0.0123137	0.997172	-0.00408539	0.993104	-0.00998306	0.997757	-0.00323892	50	1.88034e-14	3.28031e-14	13.4841	0.00573314	FALSE
YESphlox-Control	SPAPB24D3.08c	0.98742	-0.0182642	0.993068	-0.0100359	0.988279	-0.0170098	0.99291	-0.0102657	49	5.46845e-31	1.30696e-29	28.8837	0.00428342	FALSE
YESphlox-Control	SPAPB2B4.07	0.995854	-0.00599421	1.00155	0.00223411	0.996761	-0.00468087	1.00143	0.00206327	49	0.0166819	0.018544	1.7318	0.0115059	FALSE
YESphlox-Control	SPBC106.10	1.12643	0.171755	1.13287	0.179984	1.13177	0.178576	1.13707	0.18532	50	2.99392e-29	3.97526e-28	27.4006	0.0367672	TRUE
YESphlox-Control	SPBC1105.05	0.984284	-0.0228535	0.989914	-0.0146252	0.987339	-0.0183828	0.991965	-0.0116387	50	6.32168e-18	1.42536e-17	16.8461	0.00866954	FALSE
YESphlox-Control	SPBC1105.14	1.0251	0.0357683	1.03097	0.0439966	1.02838	0.0403674	1.03319	0.0471115	49	5.30409e-13	8.28547e-13	12.0817	0.0181341	TRUE
YESphlox-Control	SPBC119.03	0.997076	-0.00422455	1.00278	0.00400377	0.995659	-0.00627605	1.00032	0.000468088	50	0.0483405	0.0525154	1.27971	0.00994582	FALSE
YESphlox-Control	SPBC119.16c	0.995934	-0.00587822	1.00163	0.0023501	0.99562	-0.0063327	1.00029	0.000411431	50	4.36338e-05	5.26691e-05	4.27844	0.00606027	FALSE
YESphlox-Control	SPBC1198.07c	0.981199	-0.0273819	0.986811	-0.0191536	0.982134	-0.0260081	0.986736	-0.019264	50	3.08767e-23	1.17135e-22	21.9313	0.00799574	TRUE
YESphlox-Control	SPBC1198.11c	1.02245	0.032027	1.0283	0.0402554	1.02221	0.0316984	1.027	0.0384425	50	6.97363e-11	9.98022e-11	10.0009	0.0192641	TRUE
YESphlox-Control	SPBC1198.14c	1.00302	0.00434531	1.00875	0.0125736	1.00068	0.00098414	1.00537	0.00772828	50	0.0556592	0.0601123	1.22104	0.0106391	FALSE
YESphlox-Control	SPBC11B10.10c	1.02358	0.0336249	1.02944	0.0418532	1.02812	0.0400019	1.03293	0.046746	50	3.59985e-11	5.18292e-11	10.2854	0.0197904	TRUE
YESphlox-Control	SPBC14C8.15	0.988066	-0.0173209	0.993717	-0.00909254	0.989139	-0.0157552	0.993773	-0.00901109	50	1.78407e-19	4.84537e-19	18.3147	0.00620369	FALSE
YESphlox-Control	SPBC14C8.16c	1.13569	0.183574	1.14219	0.191802	1.14091	0.190191	1.14626	0.196935	50	2.27578e-29	3.19947e-28	27.4949	0.0391936	TRUE
YESphlox-Control	SPBC14F5.10c	0.989302	-0.0155174	0.99496	-0.00728905	0.990588	-0.0136431	0.995229	-0.006899	50	1.2323e-16	2.53896e-16	15.5953	0.00640234	FALSE
YESphlox-Control	SPBC1539.02	0.990529	-0.0137282	0.996195	-0.00549989	0.991843	-0.0118162	0.99649	-0.00507209	50	1.12012e-27	7.64879e-27	26.1164	0.00372678	FALSE
YESphlox-Control	SPBC15C4.06c	0.992092	-0.0114535	0.997767	-0.00322514	0.992955	-0.0101993	0.997608	-0.00345516	50	2.05185e-23	8.17319e-23	22.0876	0.00357849	FALSE
YESphlox-Control	SPBC15D4.05	0.989656	-0.0150016	0.995316	-0.00677329	0.990261	-0.0141194	0.994901	-0.00737525	49	3.99222e-15	7.12046e-15	14.1475	0.00661221	FALSE
YESphlox-Control	SPBC1604.16c	0.993134	-0.00993922	0.998815	-0.0017109	0.993982	-0.00870813	0.99864	-0.001964	50	6.73307e-23	2.51438e-22	21.5996	0.00312656	FALSE
YESphlox-Control	SPBC16A3.02c	0.996671	-0.00481129	1.00237	0.00341703	0.99772	-0.00329238	1.0024	0.00345175	50	3.46861e-07	4.40956e-07	6.3556	0.00346975	FALSE
YESphlox-Control	SPBC16A3.08c	0.990224	-0.0141726	0.995888	-0.0059443	0.991582	-0.0121966	0.996228	-0.00545245	50	4.17723e-19	1.05851e-18	17.9753	0.00521819	FALSE
YESphlox-Control	SPBC16C6.01c	1.00119	0.00172275	1.00692	0.00995107	1.00256	0.00368582	1.00726	0.01043	50	0.336005	0.346143	0.460744	0.0083372	FALSE
YESphlox-Control	SPBC16D10.08c	0.982042	-0.0261441	0.987659	-0.0179158	0.984223	-0.0229426	0.988835	-0.0161984	50	3.09361e-24	1.29715e-23	22.887	0.00736512	TRUE
YESphlox-Control	SPBC16E9.13	0.993052	-0.0100588	0.998732	-0.00183046	0.993892	-0.00883913	0.998549	-0.00209499	50	1.48294e-12	2.25747e-12	11.6464	0.00521996	FALSE
YESphlox-Control	SPBC16E9.16c	0.998266	-0.0025045	1.00398	0.00572382	0.998255	-0.00252	1.00293	0.00422413	49	0.0446543	0.0487323	1.31218	0.00535232	FALSE
YESphlox-Control	SPBC16H5.13	0.986969	-0.0189237	0.992614	-0.0106954	0.987892	-0.0175744	0.992521	-0.0108303	50	5.98352e-41	7.15031e-39	38.1457	0.00357318	FALSE
YESphlox-Control	SPBC16H5.14c	0.986494	-0.0196185	0.992136	-0.0113902	0.988333	-0.0169316	0.992963	-0.0101874	49	6.28587e-48	1.50232e-45	44.8232	0.00318754	FALSE
YESphlox-Control	SPBC1709.09	1.00047	0.00067782	1.00619	0.00890614	1.00094	0.00135186	1.00563	0.00809599	50	0.649631	0.65789	0.181847	0.00681058	FALSE
YESphlox-Control	SPBC1778.07	0.997321	-0.00387031	1.00303	0.00435801	0.997321	-0.00387002	1.00199	0.00287411	50	0.00686178	0.00784673	2.10531	0.00628191	FALSE
YESphlox-Control	SPBC17G9.07	1.09888	0.136033	1.10516	0.144261	1.12091	0.164674	1.12616	0.171418	48	1.67068e-13	2.67982e-13	12.5719	0.067552	TRUE
YESphlox-Control	SPBC17G9.09	0.999752	-0.000358211	1.00547	0.00787011	0.99729	-0.00391449	1.00196	0.00282965	50	0.877656	0.885063	0.053026	0.0110938	FALSE
YESphlox-Control	SPBC1861.02	1.01159	0.0166298	1.01738	0.0248581	1.01328	0.0190378	1.01803	0.025782	49	2.95225e-16	5.83129e-16	15.2342	0.00694629	FALSE
YESphlox-Control	SPBC18A7.01	0.995732	-0.00617069	1.00143	0.00205763	0.997405	-0.00374898	1.00208	0.00299516	50	1.12622e-09	1.54694e-09	8.81053	0.00368907	FALSE
YESphlox-Control	SPBC18E5.10	1.03532	0.0500766	1.04124	0.0583049	1.02953	0.0419874	1.03436	0.0487315	50	3.83192e-10	5.32459e-10	9.27371	0.0321839	TRUE
YESphlox-Control	SPBC18H10.02	1.06072	0.085049	1.06679	0.0932773	1.04876	0.0686782	1.05367	0.0754224	50	1.76359e-16	3.60255e-16	15.4434	0.0354327	TRUE
YESphlox-Control	SPBC18H10.04c	1.01243	0.0178248	1.01822	0.0260531	1.01517	0.0217186	1.01992	0.0284627	50	2.75447e-12	4.14037e-12	11.383	0.00962177	TRUE
YESphlox-Control	SPBC18H10.05	0.989845	-0.0147261	0.995506	-0.00649776	0.991184	-0.0127752	0.995828	-0.00603103	50	2.39873e-27	1.54945e-26	25.8098	0.00401412	FALSE
YESphlox-Control	SPBC19C7.01	0.990262	-0.0141181	0.995926	-0.00588979	0.990531	-0.0137258	0.995172	-0.00698169	50	3.665e-19	9.52103e-19	18.0213	0.00518601	FALSE
YESphlox-Control	SPBC1D7.03	0.997056	-0.00425337	1.00276	0.00397495	0.998641	-0.00196208	1.00332	0.00478206	48	0.0348389	0.038371	1.416	0.00910656	FALSE
YESphlox-Control	SPBC20F10.02c	1.00093	0.0013461	1.00666	0.00957443	1.00256	0.00368714	1.00726	0.0104313	50	0.275796	0.285348	0.544625	0.00541586	FALSE
YESphlox-Control	SPBC20F10.03	0.992525	-0.0108245	0.998202	-0.0025962	0.994234	-0.00834217	0.998893	-0.00159803	50	3.49029e-16	6.78195e-16	15.1686	0.00457726	FALSE
YESphlox-Control	SPBC21.03c	0.994102	-0.00853487	0.999788	-0.000306554	0.99597	-0.00582647	1.00064	0.00091767	50	2.76467e-10	3.86407e-10	9.41295	0.00514398	FALSE
YESphlox-Control	SPBC215.05	1.08554	0.118414	1.09175	0.126642	1.09281	0.128044	1.09793	0.134788	49	1.92386e-21	6.21356e-21	20.2067	0.0365861	TRUE
YESphlox-Control	SPBC215.06c	0.984989	-0.0218201	0.990623	-0.0135918	0.98607	-0.020238	0.99069	-0.0134939	50	5.99291e-25	2.75444e-24	23.56	0.00612189	FALSE
YESphlox-Control	SPBC21C3.03	0.999733	-0.000384853	1.00545	0.00784347	0.997248	-0.00397505	1.00192	0.00276909	50	0.919786	0.923651	0.0344922	0.0185487	FALSE
YESphlox-Control	SPBC21C3.08c	0.986745	-0.0192511	0.992389	-0.0110228	0.987889	-0.0175797	0.992518	-0.0108355	50	4.34672e-26	2.53382e-25	24.5962	0.00528047	FALSE
YESphlox-Control	SPBC21C3.14c	0.998198	-0.00260174	1.00391	0.00562658	0.998517	-0.00214079	1.0032	0.00460334	50	0.0144002	0.0160825	1.79365	0.00437547	FALSE
YESphlox-Control	SPBC21C3.18	0.998736	-0.00182412	1.00445	0.0064042	0.999673	-0.000471853	1.00436	0.00627228	50	0.0680487	0.0722829	1.14096	0.00406071	FALSE
YESphlox-Control	SPBC25B2.04c	0.990523	-0.0137377	0.996188	-0.00550935	0.992566	-0.0107643	0.997217	-0.00402021	50	1.40916e-11	2.0662e-11	10.6848	0.00769342	FALSE
YESphlox-Control	SPBC25H2.14	0.990992	-0.0130546	0.99666	-0.00482631	0.990983	-0.0130682	0.995626	-0.00632402	50	3.69722e-14	6.17926e-14	13.2091	0.00618501	FALSE
YESphlox-Control	SPBC28F2.03	0.998264	-0.00250716	1.00397	0.00572116	0.999393	-0.000876438	1.00408	0.0058677	50	0.0639508	0.0685392	1.16406	0.00598367	FALSE
YESphlox-Control	SPBC2D10.03c	0.992579	-0.0107463	0.998256	-0.00251793	0.993454	-0.0094755	0.998109	-0.00273136	50	8.4664e-11	1.19732e-10	9.92179	0.00632852	FALSE
YESphlox-Control	SPBC2D10.05	0.994635	-0.00776057	1.00032	0.000467746	0.995328	-0.00675666	0.999991	-1.2528e-05	50	3.82405e-13	6.05264e-13	12.2181	0.00375898	FALSE
YESphlox-Control	SPBC2G2.06c	0.993592	-0.00927407	0.999275	-0.00104575	0.994835	-0.00747069	0.999497	-0.00072655	50	2.09182e-11	3.04845e-11	10.5159	0.00517563	FALSE
YESphlox-Control	SPBC30D10.10c	1.13092	0.177502	1.13739	0.18573	1.13658	0.184703	1.14191	0.191448	50	4.30441e-29	4.89883e-28	27.3099	0.0383566	TRUE
YESphlox-Control	SPBC30D10.13c	0.998257	-0.0025168	1.00397	0.00571152	0.998549	-0.00209544	1.00323	0.0046487	50	0.0691685	0.0731472	1.1358	0.00615215	FALSE
YESphlox-Control	SPBC31E1.01c	0.98275	-0.0251041	0.988371	-0.0168758	0.984709	-0.0222304	0.989323	-0.0154863	50	4.20745e-19	1.05851e-18	17.9753	0.0089244	TRUE
YESphlox-Control	SPBC32F12.03c	0.9969	-0.00447907	1.0026	0.00374925	0.997997	-0.00289242	1.00267	0.00385172	50	6.74877e-06	8.31421e-06	5.08018	0.00380179	FALSE
YESphlox-Control	SPBC32H8.03	0.981128	-0.0274867	0.98674	-0.0192583	0.982741	-0.0251165	0.987346	-0.0183723	50	9.49362e-26	5.04217e-25	24.2974	0.00725136	TRUE
YESphlox-Control	SPBC36.07	1.13888	0.18761	1.14539	0.195838	1.14641	0.197124	1.15178	0.203868	50	3.01124e-28	2.32157e-27	26.6342	0.0424149	TRUE
YESphlox-Control	SPBC365.12c	0.996802	-0.00462049	1.0025	0.00360783	0.997161	-0.00410236	1.00183	0.00264178	49	5.20374e-05	6.21847e-05	4.20632	0.00456158	FALSE
YESphlox-Control	SPBC365.20c	0.992364	-0.0110585	0.99804	-0.00283021	0.992574	-0.0107539	0.997224	-0.00400979	50	3.14089e-15	5.64416e-15	14.2484	0.00491994	FALSE
YESphlox-Control	SPBC3B8.02	1.1478	0.198869	1.15436	0.207097	1.15485	0.207711	1.16027	0.214455	50	1.32623e-29	2.43823e-28	27.6129	0.0421541	TRUE
YESphlox-Control	SPBC3B8.08	0.993315	-0.00967728	0.998996	-0.00144896	0.994349	-0.008176	0.999008	-0.00143187	50	1.80916e-13	2.88259e-13	12.5402	0.00472817	FALSE
YESphlox-Control	SPBC3E7.07c	0.989701	-0.0149354	0.995362	-0.0067071	0.990527	-0.0137324	0.995168	-0.00698825	50	3.74248e-25	1.78891e-24	23.7474	0.00435566	FALSE
YESphlox-Control	SPBC3H7.03c	1.1205	0.164141	1.12691	0.172369	1.12838	0.174254	1.13367	0.180998	50	1.95893e-29	3.05775e-28	27.5146	0.0347489	TRUE
YESphlox-Control	SPBC3H7.10	1.1328	0.179898	1.13928	0.188126	1.13731	0.185629	1.14264	0.192373	50	2.04703e-29	3.05775e-28	27.5146	0.0382814	TRUE
YESphlox-Control	SPBC409.07c	1.15021	0.201892	1.15678	0.21012	1.15013	0.201803	1.15552	0.208547	50	1.21599e-27	8.07282e-27	26.093	0.0472701	TRUE
YESphlox-Control	SPBC428.08c	0.995407	-0.0066413	1.0011	0.00158702	0.998066	-0.00279253	1.00274	0.00395161	45	0.0558365	0.0601123	1.22104	0.0155893	FALSE
YESphlox-Control	SPBC428.15	0.990614	-0.0136046	0.99628	-0.00537632	0.991756	-0.0119422	0.996403	-0.0051981	44	2.07169e-10	2.91256e-10	9.53573	0.00758494	FALSE
YESphlox-Control	SPBC4F6.08c	0.990039	-0.0144423	0.995702	-0.00621402	0.990604	-0.0136203	0.995245	-0.00687613	50	1.54456e-15	2.83962e-15	14.5467	0.00632577	FALSE
YESphlox-Control	SPBC543.07	1.00267	0.00385129	1.00841	0.0120796	1.00541	0.00778808	1.01012	0.0145322	50	0.0290855	0.0321826	1.49238	0.00806636	FALSE
YESphlox-Control	SPBC646.09c	1.14393	0.194004	1.15048	0.202232	1.14645	0.19717	1.15182	0.203915	50	2.32329e-28	1.98309e-27	26.7027	0.0436968	TRUE
YESphlox-Control	SPBC646.13	0.98496	-0.0218623	0.990594	-0.013634	0.986506	-0.0196	0.991129	-0.0128559	50	2.24689e-33	1.07401e-31	30.969	0.00472964	FALSE
YESphlox-Control	SPBC649.04	0.991861	-0.0117902	0.997534	-0.00356187	0.992935	-0.0102286	0.997588	-0.00348443	50	3.29378e-17	7.0287e-17	16.1531	0.00474971	FALSE
YESphlox-Control	SPBC660.10	0.988789	-0.0162648	0.994445	-0.00803651	0.990307	-0.0140519	0.994947	-0.00730779	50	8.76023e-19	2.11484e-18	17.6747	0.00603405	FALSE
YESphlox-Control	SPBC685.04c	0.989588	-0.0151001	0.995248	-0.00687178	0.990972	-0.0130831	0.995616	-0.00633895	49	3.40864e-18	7.83331e-18	17.1061	0.00568475	FALSE
YESphlox-Control	SPBC691.03c	0.985746	-0.0207117	0.991385	-0.0124834	0.986967	-0.0189269	0.991591	-0.0121828	49	8.5563e-25	3.7181e-24	23.4297	0.00577626	FALSE
YESphlox-Control	SPBC725.11c	0.991574	-0.0122073	0.997246	-0.00397899	0.993474	-0.00944524	0.998129	-0.0027011	50	1.59288e-19	4.42674e-19	18.3539	0.00443164	FALSE
YESphlox-Control	SPBC776.01	0.990622	-0.0135939	0.996288	-0.0053656	0.991654	-0.0120915	0.9963	-0.00534736	50	3.0677e-16	6.00967e-16	15.2211	0.00574281	FALSE
YESphlox-Control	SPBC947.05c	0.997371	-0.00379785	1.00308	0.00443047	0.998707	-0.00186678	1.00339	0.00487735	50	0.00762421	0.00867707	2.06163	0.00624518	FALSE
YESphlox-Control	SPBC947.09	0.992886	-0.0102995	0.998565	-0.00207115	0.993162	-0.00989882	0.997816	-0.00315469	50	3.12184e-09	4.23932e-09	8.3727	0.0068721	FALSE
YESphlox-Control	SPBC9B6.03	0.985964	-0.0203927	0.991604	-0.0121644	0.986912	-0.0190064	0.991536	-0.0122623	50	2.416e-15	4.37443e-15	14.3591	0.00894761	FALSE
YESphlox-Control	SPBP22H7.04	0.989915	-0.014623	0.995577	-0.00639465	0.990587	-0.0136449	0.995228	-0.00690072	50	1.76362e-28	1.56113e-27	26.8066	0.00385843	FALSE
YESphlox-Control	SPBP35G2.11c	0.993526	-0.00937092	0.999208	-0.0011426	0.99503	-0.00718802	0.999692	-0.000443883	50	1.53491e-13	2.47868e-13	12.6058	0.00454635	FALSE
YESphlox-Control	SPBP8B7.27	0.998046	-0.00282227	1.00375	0.00540605	0.999148	-0.00122997	1.00383	0.00551417	49	0.00997213	0.0112422	1.94915	0.00449162	FALSE
YESphlox-Control	SPBP8B7.31	0.980153	-0.0289205	0.98576	-0.0206922	0.981377	-0.0271205	0.985975	-0.0203763	50	9.31771e-26	5.04217e-25	24.2974	0.00757457	TRUE
YESphlox-Control	SPBPB21E7.04c	0.997011	-0.00431927	1.00271	0.00390905	0.997873	-0.00307235	1.00255	0.00367178	50	0.000104245	0.00012334	3.9089	0.00448945	FALSE
YESphlox-Control	SPBPJ4664.05	0.98849	-0.016702	0.994144	-0.00847369	0.989302	-0.0155174	0.993937	-0.00877322	50	6.04227e-30	1.31282e-28	27.8818	0.00416161	FALSE
YESphlox-Control	SPCC1020.08	0.986159	-0.0201074	0.9918	-0.0118791	0.98768	-0.0178848	0.992308	-0.0111406	50	2.49317e-18	5.95868e-18	17.2249	0.0075282	FALSE
YESphlox-Control	SPCC1235.03	0.991326	-0.0125678	0.996997	-0.00433952	0.99293	-0.0102355	0.997583	-0.0034914	50	2.37241e-23	9.14527e-23	22.0388	0.00393601	FALSE
YESphlox-Control	SPCC1259.02c	1.14011	0.189178	1.14664	0.197406	1.14527	0.195693	1.15064	0.202437	50	2.55399e-28	2.10484e-27	26.6768	0.0426359	TRUE
YESphlox-Control	SPCC126.12	0.99177	-0.0119222	0.997443	-0.00369387	0.993821	-0.00894215	0.998478	-0.00219801	50	3.97143e-20	1.15753e-19	18.9365	0.00422121	FALSE
YESphlox-Control	SPCC1393.13	0.990562	-0.0136803	0.996228	-0.00545193	0.992852	-0.010349	0.997504	-0.00360488	50	4.90963e-15	8.69186e-15	14.0609	0.00616396	FALSE
YESphlox-Control	SPCC13B11.01	1.12473	0.169573	1.13116	0.177801	1.13218	0.1791	1.13748	0.185844	50	7.24011e-29	7.52342e-28	27.1236	0.0369766	TRUE
YESphlox-Control	SPCC1494.08c	1.00405	0.00583818	1.0098	0.0140665	1.00565	0.00813155	1.01036	0.0148757	50	0.00231253	0.00265719	2.57558	0.00864388	FALSE
YESphlox-Control	SPCC162.12	0.989825	-0.0147551	0.995486	-0.00652679	0.991456	-0.0123797	0.996101	-0.00563556	50	2.27827e-19	6.01243e-19	18.2209	0.0053605	FALSE
YESphlox-Control	SPCC1620.03	0.990979	-0.0130738	0.996647	-0.00484544	0.991574	-0.012208	0.99622	-0.00546384	50	6.58356e-22	2.21616e-21	20.6544	0.00430986	FALSE
YESphlox-Control	SPCC16A11.08	0.99007	-0.0143982	0.995732	-0.00616989	0.990392	-0.0139288	0.995032	-0.00718462	50	1.12438e-17	2.46538e-17	16.6081	0.00565665	FALSE
YESphlox-Control	SPCC16C4.11	1.12346	0.167948	1.12989	0.176177	1.12861	0.174551	1.1339	0.181295	50	3.51198e-29	4.4177e-28	27.3548	0.0360394	TRUE
YESphlox-Control	SPCC1753.02c	1.09528	0.1313	1.10154	0.139528	1.10292	0.141329	1.10809	0.148073	50	1.16626e-22	4.22326e-22	21.3744	0.038993	TRUE
YESphlox-Control	SPCC188.02	1.13061	0.177101	1.13708	0.18533	1.13565	0.183523	1.14097	0.190267	50	5.15637e-28	3.85116e-27	26.4144	0.0403871	TRUE
YESphlox-Control	SPCC18B5.03	0.982585	-0.0253461	0.988205	-0.0171177	0.983955	-0.0233358	0.988565	-0.0165916	50	6.16064e-25	2.7781e-24	23.5563	0.00697377	TRUE
YESphlox-Control	SPCC24B10.18	0.977179	-0.0333052	0.982768	-0.0250769	0.979552	-0.0298056	0.984142	-0.0230614	49	3.83417e-26	2.29092e-25	24.64	0.00825339	TRUE
YESphlox-Control	SPCC320.03	0.98541	-0.0212035	0.991047	-0.0129752	0.986339	-0.0198444	0.990961	-0.0131003	44	1.5831e-14	2.78207e-14	13.5556	0.00876809	FALSE
YESphlox-Control	SPCC320.07c	0.98792	-0.0175337	0.993571	-0.00930542	0.988768	-0.0162958	0.993401	-0.00955169	50	8.21497e-25	3.63589e-24	23.4394	0.00508447	FALSE
YESphlox-Control	SPCC338.04	0.994727	-0.00762807	1.00042	0.000600253	0.995327	-0.00675812	0.99999	-1.39881e-05	50	1.28285e-08	1.71286e-08	7.76628	0.00524724	FALSE
YESphlox-Control	SPCC4B3.03c	0.994215	-0.00836951	0.999902	-0.000141186	0.996178	-0.00552525	1.00085	0.00121889	50	1.88617e-08	2.50442e-08	7.60129	0.00590993	FALSE
YESphlox-Control	SPCC4B3.12	0.987554	-0.0180684	0.993203	-0.00984005	0.988473	-0.0167259	0.993105	-0.00998181	50	5.88981e-16	1.12613e-15	14.9484	0.00768868	FALSE
YESphlox-Control	SPCC4G3.09c	0.989907	-0.0146356	0.995569	-0.00640723	0.991443	-0.0123977	0.996089	-0.00565356	48	9.56302e-13	1.4651e-12	11.8341	0.00734221	FALSE
YESphlox-Control	SPCC4G3.12c	0.995056	-0.00715081	1.00075	0.00107751	0.996687	-0.00478707	1.00136	0.00195706	50	4.61656e-06	5.71688e-06	5.24284	0.0065181	FALSE
YESphlox-Control	SPCC4G3.17	0.987466	-0.0181967	0.993114	-0.00996837	0.989466	-0.0152781	0.994102	-0.00853397	50	1.88663e-22	6.72992e-22	21.172	0.00573146	FALSE
YESphlox-Control	SPCC553.01c	1.13351	0.180803	1.14	0.189031	1.13804	0.18655	1.14337	0.193295	50	1.26863e-28	1.21281e-27	26.9162	0.0400332	TRUE
YESphlox-Control	SPCC5E4.10c	0.990533	-0.0137225	0.996199	-0.00549417	0.992068	-0.0114893	0.996716	-0.00474519	50	8.27004e-19	2.01688e-18	17.6953	0.00512534	FALSE
YESphlox-Control	SPCC613.03	0.996508	-0.00504692	1.00221	0.0031814	0.997412	-0.00373923	1.00209	0.00300491	50	9.03433e-06	1.10164e-05	4.95796	0.00453175	FALSE
YESphlox-Control	SPCC622.11	0.996533	-0.00501051	1.00223	0.00321781	0.996832	-0.00457753	1.0015	0.00216661	50	8.82763e-06	1.08195e-05	4.96579	0.00448388	FALSE
YESphlox-Control	SPCC63.03	0.995232	-0.00689538	1.00092	0.00133294	0.996337	-0.00529362	1.00101	0.00145051	50	9.29768e-06	1.12799e-05	4.94769	0.00653241	FALSE
YESphlox-Control	SPCC63.06	1.00377	0.00542823	1.00951	0.0136566	1.00455	0.00655231	1.00926	0.0132964	50	0.0411622	0.0451273	1.34556	0.012527	FALSE
YESphlox-Control	SPCC663.06c	0.988936	-0.0160512	0.994592	-0.00782285	0.991009	-0.0130299	0.995653	-0.00628574	50	1.53589e-17	3.307e-17	16.4806	0.00632071	FALSE
YESphlox-Control	SPCC736.13	0.987783	-0.0177338	0.993433	-0.00950548	0.988589	-0.0165574	0.993221	-0.00981329	50	3.82326e-19	9.82538e-19	18.0077	0.00643762	FALSE
YESphlox-Control	SPCC794.03	0.987684	-0.0178778	0.993334	-0.00964951	0.988856	-0.0161676	0.993489	-0.00942344	50	2.04183e-21	6.41259e-21	20.193	0.00587832	FALSE
YESphlox-Control	SPCC962.05	0.99157	-0.0122128	0.997242	-0.00398445	0.991823	-0.0118456	0.99647	-0.00510145	50	5.2823e-21	1.61855e-20	19.7909	0.0041747	FALSE
YESphlox-Control	SPCC965.12	0.987471	-0.0181894	0.993119	-0.00996109	0.990015	-0.0144777	0.994654	-0.00773361	50	2.9089e-28	2.31743e-27	26.635	0.00469593	FALSE
YESphlox-Control	SPCP31B10.02	0.986652	-0.0193861	0.992296	-0.0111578	0.987156	-0.0186501	0.991781	-0.011906	49	8.44171e-21	2.55389e-20	19.5928	0.00638072	FALSE
EMMphlox-Control	972	1	0	1.01404	0.0201211	1	0	1.01258	0.0180418	77	1	1	0	0.0155657	FALSE
EMMphlox-Control	SPAC105.02c	1.03061	0.043495	1.04508	0.0636161	1.01369	0.0196179	1.02645	0.0376597	6	0.186731	0.210513	0.676721	0.04964	FALSE
EMMphlox-Control	SPAC1071.07c	1.08268	0.11461	1.09789	0.134731	1.07946	0.110306	1.09304	0.128348	7	0.000902266	0.00199668	2.69969	0.0370225	TRUE
EMMphlox-Control	SPAC1071.09c	0.976611	-0.0341444	0.990327	-0.0140232	0.97359	-0.0386144	0.985841	-0.0205726	7	0.00114545	0.00248161	2.60527	0.0118387	TRUE
EMMphlox-Control	SPAC10F6.14c	0.978316	-0.0316269	0.992057	-0.0115058	0.971701	-0.0414162	0.983929	-0.0233744	7	0.00602064	0.00992367	2.00333	0.0144905	TRUE
EMMphlox-Control	SPAC11E3.12	0.998422	-0.00227856	1.01244	0.0178426	0.994147	-0.00846896	1.00666	0.00957282	7	0.806076	0.816323	0.0881381	0.0159364	FALSE
EMMphlox-Control	SPAC12G12.11c	0.985412	-0.0212018	0.999251	-0.00108063	0.986479	-0.0196391	0.998893	-0.00159732	7	3.77546e-08	4.85918e-07	6.31344	0.00336377	FALSE
EMMphlox-Control	SPAC13A11.06	0.979113	-0.0304526	0.992864	-0.0103314	0.979175	-0.030362	0.991497	-0.0123202	7	4.05329e-05	0.000172013	3.76444	0.0074193	TRUE
EMMphlox-Control	SPAC13F5.03c	0.986216	-0.0200238	1.00007	9.73107e-05	0.983456	-0.0240677	0.995832	-0.00602593	7	0.0202713	0.0283324	1.54772	0.011912	TRUE
EMMphlox-Control	SPAC13F5.04c	0.973044	-0.0394237	0.98671	-0.0193025	0.976748	-0.0339421	0.989039	-0.0159003	6	0.000402023	0.0010277	2.98813	0.0098288	TRUE
EMMphlox-Control	SPAC140.01	0.970377	-0.0433827	0.984006	-0.0232616	0.973167	-0.0392401	0.985414	-0.0211983	7	0.00019571	0.000599676	3.22208	0.0115146	TRUE
EMMphlox-Control	SPAC1556.02c	0.964869	-0.0515944	0.978421	-0.0314732	0.961204	-0.057085	0.9733	-0.0390432	7	0.000385012	0.00100897	2.99612	0.0145318	TRUE
EMMphlox-Control	SPAC15A10.10	0.980248	-0.0287809	0.994016	-0.00865974	0.982529	-0.025428	0.994893	-0.00738624	7	1.11417e-08	1.58738e-07	6.79932	0.00435123	TRUE
EMMphlox-Control	SPAC16.01	0.966049	-0.0498317	0.979617	-0.0297106	0.967348	-0.0478925	0.979522	-0.0298507	7	4.10239e-05	0.000172013	3.76444	0.0108004	TRUE
EMMphlox-Control	SPAC1610.02c	1.07409	0.103112	1.08917	0.123233	1.08551	0.11837	1.09917	0.136412	7	0.000511134	0.00119808	2.92152	0.0301261	TRUE
EMMphlox-Control	SPAC1687.14c	0.99275	-0.0104983	1.00669	0.00962286	0.999038	-0.00138877	1.01161	0.016653	7	0.15955	0.184214	0.734677	0.0116477	FALSE
EMMphlox-Control	SPAC1687.15	0.984718	-0.0222177	0.998548	-0.00209654	0.984096	-0.0231297	0.99648	-0.00508796	7	0.00210972	0.00387863	2.41132	0.00875726	TRUE
EMMphlox-Control	SPAC16E8.01	1.03946	0.0558357	1.05406	0.0759569	1.03474	0.049268	1.04776	0.0673098	7	0.0202334	0.0283324	1.54772	0.0338839	TRUE
EMMphlox-Control	SPAC1705.02	0.990223	-0.0141746	1.00413	0.00594658	0.989124	-0.0157763	1.00157	0.00226547	7	0.17141	0.194157	0.711848	0.0165629	FALSE
EMMphlox-Control	SPAC17A2.02c	0.983173	-0.0244825	0.996981	-0.00436141	0.983853	-0.0234852	0.996234	-0.00544343	7	0.00166091	0.00320126	2.49468	0.00925991	TRUE
EMMphlox-Control	SPAC17A5.16	1.0238	0.0339316	1.03818	0.0540528	1.01689	0.0241597	1.02968	0.0422015	7	0.0493581	0.0634779	1.19738	0.0259666	FALSE
EMMphlox-Control	SPAC17H9.04c	0.994573	-0.00785042	1.00854	0.0122707	0.99382	-0.00894411	1.00633	0.00909767	7	0.0916662	0.111209	0.953859	0.00650549	FALSE
EMMphlox-Control	SPAC17H9.06c	0.979136	-0.0304184	0.992888	-0.0102973	0.979557	-0.0297982	0.991884	-0.0117565	7	5.03445e-05	0.000197251	3.70498	0.00755435	TRUE
EMMphlox-Control	SPAC1805.07c	1.04602	0.0649133	1.06071	0.0850344	1.05479	0.0769625	1.06807	0.0950043	7	0.00413237	0.00705455	2.15153	0.0278586	TRUE
EMMphlox-Control	SPAC1834.04	0.994754	-0.00758839	1.00872	0.0125327	0.998266	-0.00250383	1.01083	0.015538	7	0.169162	0.192522	0.715519	0.00828786	FALSE
EMMphlox-Control	SPAC1834.09	0.974282	-0.0375892	0.987965	-0.0174681	0.971735	-0.0413651	0.983963	-0.0233233	7	2.76298e-05	0.000129481	3.88779	0.00842935	TRUE
EMMphlox-Control	SPAC186.06	0.988902	-0.0161009	1.00279	0.00402021	0.987412	-0.0182764	0.999837	-0.000234641	7	0.0148949	0.0217066	1.66341	0.00892484	FALSE
EMMphlox-Control	SPAC18B11.04	0.983685	-0.0237312	0.997501	-0.0036101	0.982824	-0.0249957	0.995192	-0.00695387	7	0.0526765	0.0666121	1.17645	0.0181017	FALSE
EMMphlox-Control	SPAC19B12.07c	0.96146	-0.0567014	0.974963	-0.0365802	0.963101	-0.0542416	0.97522	-0.0361998	7	4.23844e-05	0.000174653	3.75782	0.0119542	TRUE
EMMphlox-Control	SPAC19G12.15c	1.00023	0.000330958	1.01428	0.0204521	0.986154	-0.0201152	0.998564	-0.00207345	7	0.987034	0.991181	0.00384712	0.0360813	FALSE
EMMphlox-Control	SPAC1A6.04c	0.977334	-0.0330762	0.99106	-0.0129551	0.982715	-0.0251545	0.995082	-0.00711276	7	0.00621917	0.0100715	1.99691	0.0152123	TRUE
EMMphlox-Control	SPAC1B9.02c	0.97476	-0.0368809	0.98845	-0.0167598	0.977947	-0.0321712	0.990254	-0.0141294	7	0.000383554	0.00100897	2.99612	0.0109276	TRUE
EMMphlox-Control	SPAC1D4.03c	0.998241	-0.00254062	1.01226	0.0175805	0.998512	-0.00214904	1.01108	0.0158927	7	0.711227	0.726425	0.13881	0.011385	FALSE
EMMphlox-Control	SPAC1F3.09	0.982975	-0.0247739	0.99678	-0.00465279	0.991482	-0.0123416	1.00396	0.0057002	7	0.030715	0.0410598	1.38658	0.0162855	FALSE
EMMphlox-Control	SPAC1F8.06	0.981801	-0.0264977	0.99559	-0.00637661	0.974363	-0.0374688	0.986624	-0.019427	7	0.0631464	0.0781968	1.10681	0.0213691	FALSE
EMMphlox-Control	SPAC20G4.05c	0.988536	-0.0166348	1.00242	0.00348633	0.990684	-0.0135024	1.00315	0.00453935	7	0.000408499	0.0010277	2.98813	0.0053429	FALSE
EMMphlox-Control	SPAC20H4.03c	0.957924	-0.0620166	0.971378	-0.0418955	0.966081	-0.0497838	0.978238	-0.0317421	7	0.00328053	0.00589508	2.22951	0.0244191	TRUE
EMMphlox-Control	SPAC21E11.04	0.988244	-0.017061	1.00212	0.00306013	0.990345	-0.0139964	1.00281	0.00404536	7	5.6148e-06	3.35484e-05	4.47433	0.00360144	FALSE
EMMphlox-Control	SPAC227.17c	1.09723	0.133872	1.11264	0.153993	1.0821	0.113832	1.09572	0.131874	7	0.00133292	0.00269974	2.56868	0.0466375	TRUE
EMMphlox-Control	SPAC22A12.06c	0.967318	-0.0479377	0.980904	-0.0278165	0.967411	-0.0477986	0.979585	-0.0297568	6	1.28899e-12	1.02689e-10	9.98847	0.00390145	TRUE
EMMphlox-Control	SPAC22A12.14c	0.986476	-0.0196437	1.00033	0.000477465	0.989611	-0.015066	1.00206	0.00297574	7	5.08831e-06	3.11822e-05	4.50609	0.00427918	FALSE
EMMphlox-Control	SPAC22E12.14c	0.979512	-0.0298651	0.993269	-0.00974396	0.983637	-0.0238015	0.996016	-0.00575972	7	0.0011837	0.00252593	2.59758	0.0105625	TRUE
EMMphlox-Control	SPAC22F3.04	0.991305	-0.0125998	1.00523	0.00752135	0.993644	-0.00919954	1.00615	0.00884224	7	0.0173293	0.0248006	1.60554	0.0070701	FALSE
EMMphlox-Control	SPAC23A1.06c	0.983294	-0.0243052	0.997104	-0.0041841	0.983288	-0.0243137	0.995662	-0.00627188	7	0.00214036	0.00390493	2.40839	0.00954063	TRUE
EMMphlox-Control	SPAC23C11.08	1.05382	0.0756323	1.06862	0.0957535	1.07278	0.101355	1.08628	0.119397	7	0.00372792	0.00655128	2.18367	0.0318114	TRUE
EMMphlox-Control	SPAC23C4.09c	0.973556	-0.0386638	0.987229	-0.0185426	0.973289	-0.0390603	0.985537	-0.0210185	7	2.65011e-06	1.80965e-05	4.74241	0.00718966	TRUE
EMMphlox-Control	SPAC23D3.03c	0.992946	-0.0102125	1.00689	0.00990859	0.989628	-0.0150413	1.00208	0.00300048	7	0.402215	0.433016	0.363496	0.020624	FALSE
EMMphlox-Control	SPAC23D3.04c	1.07792	0.108251	1.09306	0.128372	1.07912	0.109856	1.0927	0.127898	7	0.000255244	0.000717686	3.14407	0.0281317	TRUE
EMMphlox-Control	SPAC23G3.05c	0.978181	-0.0318272	0.991919	-0.0117061	0.979714	-0.0295677	0.992043	-0.0115259	7	3.19025e-05	0.000140956	3.85092	0.00752361	TRUE
EMMphlox-Control	SPAC23H4.09	0.97534	-0.0360233	0.989038	-0.0159022	0.978884	-0.0307908	0.991202	-0.012749	6	1.91109e-09	5.075e-08	7.29456	0.00415074	TRUE
EMMphlox-Control	SPAC24H6.04	0.982264	-0.0258166	0.99606	-0.00569542	0.983741	-0.0236492	0.996121	-0.00560737	7	0.00396423	0.00686559	2.16332	0.0111153	TRUE
EMMphlox-Control	SPAC25A8.03c	0.970026	-0.0439052	0.983649	-0.023784	0.971764	-0.0413227	0.983992	-0.023281	7	4.53448e-07	3.73703e-06	5.42747	0.00700093	TRUE
EMMphlox-Control	SPAC25B8.08	1.03827	0.0541883	1.05286	0.0743095	1.06294	0.0880564	1.07631	0.106098	7	0.0518293	0.0658894	1.18118	0.0424096	FALSE
EMMphlox-Control	SPAC26F1.10c	0.992774	-0.0104631	1.00672	0.00965805	1.00335	0.00482907	1.01598	0.0228709	7	0.439743	0.471294	0.326708	0.0230908	FALSE
EMMphlox-Control	SPAC26F1.12c	0.979057	-0.0305349	0.992808	-0.0104138	0.979072	-0.0305137	0.991392	-0.012472	7	7.68627e-05	0.000282618	3.5488	0.00787471	TRUE
EMMphlox-Control	SPAC27E2.03c	1.07858	0.109134	1.09373	0.129255	1.07985	0.110831	1.09344	0.128873	7	0.000386879	0.00100897	2.99612	0.0303919	TRUE
EMMphlox-Control	SPAC29A4.20	1.08022	0.111323	1.09539	0.131444	1.09112	0.125806	1.10485	0.143848	7	0.0001925	0.000597501	3.22366	0.0276141	TRUE
EMMphlox-Control	SPAC2F3.18c	0.957855	-0.0621204	0.971308	-0.0419992	0.961742	-0.0562778	0.973845	-0.038236	7	0.000209219	0.000619404	3.20803	0.0156449	TRUE
EMMphlox-Control	SPAC32A11.03c	0.993985	-0.00870408	1.00795	0.0114171	0.997509	-0.00359871	1.01006	0.0144431	7	0.0936607	0.112487	0.948898	0.0074808	FALSE
EMMphlox-Control	SPAC3A11.02	0.989423	-0.0153402	1.00332	0.00478093	0.991681	-0.0120523	1.00416	0.00598946	7	0.0371405	0.0490419	1.30943	0.0105208	FALSE
EMMphlox-Control	SPAC3A11.10c	0.964686	-0.0518679	0.978235	-0.0317468	0.960546	-0.0580731	0.972634	-0.0400314	7	0.000407063	0.0010277	2.98813	0.0147125	TRUE
EMMphlox-Control	SPAC3A11.11c	0.977527	-0.0327917	0.991256	-0.0126705	0.980093	-0.0290094	0.992427	-0.0109676	7	6.38122e-09	1.17316e-07	6.93064	0.00470202	TRUE
EMMphlox-Control	SPAC3A12.03c	0.986391	-0.0197688	1.00024	0.000352312	0.984306	-0.0228214	0.996693	-0.00477957	6	0.0207726	0.0288642	1.53964	0.0104484	TRUE
EMMphlox-Control	SPAC3A12.13c	1.1066	0.146137	1.12214	0.166258	1.09624	0.132564	1.11004	0.150606	7	0.00142675	0.00284161	2.54644	0.0517268	TRUE
EMMphlox-Control	SPAC3G6.03c	0.974872	-0.0367149	0.988564	-0.0165938	0.978208	-0.0317872	0.990518	-0.0137454	7	0.000511313	0.00119808	2.92152	0.0112919	TRUE
EMMphlox-Control	SPAC3G6.05	0.967044	-0.0483466	0.980626	-0.0282255	0.964291	-0.0524595	0.976426	-0.0344177	7	0.000635284	0.00143619	2.84279	0.0147547	TRUE
EMMphlox-Control	SPAC3G9.11c	0.988359	-0.0168931	1.00224	0.00322804	0.988356	-0.0168968	1.00079	0.00114503	7	0.00206413	0.00382425	2.41745	0.00667902	FALSE
EMMphlox-Control	SPAC3H1.03	0.967434	-0.0477647	0.981021	-0.0276435	0.970033	-0.0438941	0.98224	-0.0258523	7	1.97707e-07	1.92163e-06	5.71633	0.00703637	TRUE
EMMphlox-Control	SPAC3H1.08c	1.0387	0.054782	1.05329	0.0749032	1.0199	0.028425	1.03273	0.0464667	7	0.0371266	0.0490419	1.30943	0.0389375	TRUE
EMMphlox-Control	SPAC3H1.11	0.983302	-0.0242933	0.997112	-0.00417214	0.983078	-0.0246222	0.995449	-0.00658043	7	1.72082e-05	8.75057e-05	4.05796	0.00575829	TRUE
EMMphlox-Control	SPAC3H5.08c	0.995143	-0.0070239	1.00912	0.0130972	0.998831	-0.00168761	1.0114	0.0163542	7	0.288615	0.320832	0.493722	0.0105218	FALSE
EMMphlox-Control	SPAC3H5.09c	0.997987	-0.0029067	1.012	0.0172144	0.996616	-0.0048905	1.00916	0.0131513	7	0.636369	0.65557	0.183381	0.00998561	FALSE
EMMphlox-Control	SPAC3H5.10	1.04428	0.0625102	1.05895	0.0826314	1.03426	0.0486043	1.04728	0.0666461	7	0.00970076	0.0148621	1.82792	0.0320316	TRUE
EMMphlox-Control	SPAC3H8.03	0.983509	-0.0239893	0.997322	-0.00386817	0.982509	-0.0254578	0.994873	-0.007416	7	2.86101e-05	0.000131496	3.88109	0.00592748	TRUE
EMMphlox-Control	SPAC3H8.04	0.9864	-0.0197547	1.00025	0.000366482	0.98768	-0.0178846	1.00011	0.000157233	7	7.01536e-09	1.19762e-07	6.92168	0.00264259	FALSE
EMMphlox-Control	SPAC4G9.11c	0.993397	-0.00955824	1.00735	0.0105629	0.993414	-0.00953267	1.00592	0.00850911	7	0.0229748	0.0315574	1.5009	0.00535872	FALSE
EMMphlox-Control	SPAC4G9.14	0.978773	-0.0309537	0.99252	-0.0108326	0.976374	-0.0344947	0.988661	-0.0164529	7	0.000436544	0.00108424	2.96488	0.00957469	TRUE
EMMphlox-Control	SPAC4H3.04c	0.979085	-0.0304936	0.992836	-0.0103725	0.973548	-0.0386765	0.985799	-0.0206347	7	0.00578613	0.00960337	2.01758	0.0138952	TRUE
EMMphlox-Control	SPAC4H3.06	0.994567	-0.00785933	1.00854	0.0122618	0.992748	-0.0105008	1.00524	0.00754098	7	0.137705	0.160543	0.794408	0.00780296	FALSE
EMMphlox-Control	SPAC4H3.07c	1.00429	0.00617614	1.0184	0.0262973	1.01254	0.0179758	1.02528	0.0360176	7	0.568252	0.590488	0.228789	0.018614	FALSE
EMMphlox-Control	SPAC521.03	0.977631	-0.032638	0.991362	-0.0125168	0.98008	-0.0290284	0.992414	-0.0109867	7	0.00138169	0.00277499	2.55674	0.0116875	TRUE
EMMphlox-Control	SPAC56F8.02	1.0098	0.0140678	1.02398	0.0341889	1.02665	0.0379486	1.03957	0.0559904	6	0.538928	0.564929	0.248006	0.0367398	FALSE
EMMphlox-Control	SPAC57A7.09	0.974918	-0.0366469	0.988611	-0.0165257	0.977762	-0.0324455	0.990066	-0.0144037	7	3.71457e-07	3.27366e-06	5.48497	0.00615518	TRUE
EMMphlox-Control	SPAC589.07c	0.975986	-0.0350682	0.989693	-0.0149471	0.982095	-0.0260654	0.994454	-0.00802357	7	0.0012774	0.0026094	2.58346	0.0123172	TRUE
EMMphlox-Control	SPAC5H10.06c	0.991233	-0.0127046	1.00515	0.00741657	0.994062	-0.00859252	1.00657	0.00944927	7	0.004067	0.00699291	2.15534	0.00537774	FALSE
EMMphlox-Control	SPAC637.07	1.09128	0.126023	1.10661	0.146144	1.09433	0.130042	1.1081	0.148084	7	1.22854e-05	6.39398e-05	4.19423	0.0206725	TRUE
EMMphlox-Control	SPAC652.01	0.973676	-0.0384861	0.987351	-0.0183649	0.972381	-0.0404064	0.984618	-0.0223646	6	0.0131016	0.0196937	1.70567	0.0177642	TRUE
EMMphlox-Control	SPAC683.02c	0.990903	-0.0131842	1.00482	0.00693693	0.992124	-0.0114076	1.00461	0.00663422	7	0.00453534	0.00768756	2.11421	0.00573534	FALSE
EMMphlox-Control	SPAC688.03c	0.985236	-0.0214588	0.999073	-0.00133771	0.993658	-0.00917938	1.00616	0.00886241	7	0.0307519	0.0410598	1.38658	0.014114	FALSE
EMMphlox-Control	SPAC688.13	0.990133	-0.0143064	1.00404	0.00581472	0.99123	-0.0127079	1.0037	0.00533393	7	0.0072976	0.0114745	1.94027	0.00685062	FALSE
EMMphlox-Control	SPAC694.02	0.981121	-0.0274967	0.994901	-0.00737558	0.983694	-0.0237186	0.996073	-0.00567683	7	6.66651e-05	0.000252904	3.59704	0.00714106	TRUE
EMMphlox-Control	SPAC694.04c	0.986021	-0.0203091	0.99987	-0.000187979	0.988101	-0.0172697	1.00054	0.000772053	7	0.0494012	0.0634779	1.19738	0.0151844	FALSE
EMMphlox-Control	SPAC694.06c	0.997346	-0.00383443	1.01135	0.0162867	0.995783	-0.00609667	1.00831	0.0119451	7	0.672472	0.689788	0.161284	0.0154638	FALSE
EMMphlox-Control	SPAC6F12.02	0.982337	-0.0257102	0.996133	-0.00558904	0.987785	-0.0177306	1.00022	0.000311228	7	0.00717732	0.0113601	1.94462	0.0122948	FALSE
EMMphlox-Control	SPAC6F6.13c	0.973787	-0.0383218	0.987464	-0.0182007	0.974793	-0.0368317	0.98706	-0.0187899	6	2.76261e-06	1.83407e-05	4.73658	0.00611852	TRUE
EMMphlox-Control	SPAC6G10.10c	0.964537	-0.0520922	0.978083	-0.031971	0.966808	-0.0486985	0.978975	-0.0306567	6	9.84356e-08	1.06937e-06	5.97087	0.00603123	TRUE
EMMphlox-Control	SPAC7D4.05	0.987519	-0.0181197	1.00139	0.00200144	0.986087	-0.0202132	0.998496	-0.00217138	7	0.00182157	0.00342799	2.46496	0.00704727	FALSE
EMMphlox-Control	SPAC806.04c	0.974184	-0.0377333	0.987866	-0.0176121	0.975595	-0.0356462	0.987872	-0.0176044	7	1.09515e-06	8.18895e-06	5.08677	0.00668287	TRUE
EMMphlox-Control	SPAC806.07	0.986756	-0.019235	1.00061	0.000886107	0.987412	-0.0182764	0.999837	-0.000234641	7	0.00150175	0.00294195	2.53136	0.00728035	FALSE
EMMphlox-Control	SPAC821.05	1.07406	0.103078	1.08915	0.123199	1.07802	0.108381	1.09158	0.126423	7	8.70439e-05	0.000315204	3.50141	0.0226864	TRUE
EMMphlox-Control	SPAC821.07c	0.979539	-0.0298249	0.993296	-0.00970376	0.979449	-0.0299584	0.991774	-0.0119166	7	0.109047	0.130311	0.88502	0.029063	FALSE
EMMphlox-Control	SPAC823.09c	0.973072	-0.0393821	0.986738	-0.019261	0.975633	-0.0355901	0.98791	-0.0175483	7	4.47392e-05	0.000178554	3.74823	0.00912	TRUE
EMMphlox-Control	SPAC823.16c	0.985181	-0.0215394	0.999017	-0.00141824	0.98551	-0.021058	0.997912	-0.00301618	7	0.000346461	0.000940955	3.02643	0.00679071	FALSE
EMMphlox-Control	SPAC890.03	0.995209	-0.006928	1.00919	0.0131931	0.992746	-0.0105037	1.00524	0.00753804	7	0.380186	0.413021	0.384028	0.0129808	FALSE
EMMphlox-Control	SPAC8C9.06c	0.992106	-0.0114344	1.00604	0.00868673	0.996976	-0.00436894	1.00952	0.0136728	6	0.459824	0.490616	0.309258	0.0242362	FALSE
EMMphlox-Control	SPAC8C9.16c	0.973779	-0.0383334	0.987456	-0.0182123	0.971932	-0.0410731	0.984163	-0.0230313	7	1.0832e-06	8.18895e-06	5.08677	0.00674984	TRUE
EMMphlox-Control	SPAC8F11.03	0.954701	-0.0668797	0.968109	-0.0467586	0.951457	-0.0717892	0.963431	-0.0537474	7	0.000118879	0.000394612	3.40383	0.0154252	TRUE
EMMphlox-Control	SPAC977.15	0.985532	-0.0210259	0.999373	-0.000904737	0.983918	-0.0233906	0.996299	-0.00534877	7	0.0709197	0.0873702	1.05864	0.0175744	FALSE
EMMphlox-Control	SPACUNK4.13c	0.977198	-0.0332768	0.990923	-0.0131556	0.984055	-0.0231886	0.996439	-0.00514684	7	0.000619178	0.00142292	2.84682	0.0106411	TRUE
EMMphlox-Control	SPACUNK4.16c	0.974324	-0.0375271	0.988008	-0.017406	0.974533	-0.0372169	0.986797	-0.0191751	6	0.000134415	0.000434123	3.36239	0.00832378	TRUE
EMMphlox-Control	SPACUNK4.17	0.967684	-0.0473925	0.981274	-0.0272714	0.967156	-0.0481788	0.979327	-0.030137	7	2.20107e-11	8.7676e-10	9.05712	0.00486443	TRUE
EMMphlox-Control	SPAP14E8.05c	0.983803	-0.0235584	0.99762	-0.00343727	0.985223	-0.0214781	0.997621	-0.00343634	7	1.59884e-11	7.64248e-10	9.11677	0.00246333	FALSE
EMMphlox-Control	SPAP27G11.12	0.981592	-0.0268048	0.995378	-0.00668362	0.983412	-0.0241317	0.995788	-0.00608995	7	3.24375e-05	0.000140956	3.85092	0.00657478	TRUE
EMMphlox-Control	SPAP8A3.04c	0.975452	-0.035857	0.989152	-0.0157358	0.977661	-0.0325944	0.989964	-0.0145526	7	1.77079e-05	8.81707e-05	4.05468	0.00784012	TRUE
EMMphlox-Control	SPAPB1A11.02	0.999582	-0.000602929	1.01362	0.0195182	0.99698	-0.00436357	1.00953	0.0136782	7	0.945383	0.95336	0.0207429	0.015092	FALSE
EMMphlox-Control	SPAPB1E7.11c	0.982406	-0.0256091	0.996203	-0.005488	0.979717	-0.0295632	0.992046	-0.0115214	7	0.010864	0.0164335	1.78427	0.0132779	TRUE
EMMphlox-Control	SPAPB24D3.08c	0.973102	-0.0393373	0.986769	-0.0192162	0.973196	-0.0391971	0.985443	-0.0211553	7	9.32951e-05	0.000332799	3.47782	0.00980112	TRUE
EMMphlox-Control	SPAPB2B4.07	0.99114	-0.0128388	1.00506	0.00728239	0.990887	-0.0132073	1.00336	0.0048345	7	0.0822003	0.100748	0.996763	0.0110781	FALSE
EMMphlox-Control	SPBC106.10	1.06238	0.0872983	1.0773	0.107419	1.07622	0.105971	1.08976	0.124013	7	0.000491074	0.00118552	2.92609	0.0254157	TRUE
EMMphlox-Control	SPBC1105.05	0.9684	-0.0463251	0.982001	-0.0262039	0.970536	-0.0431457	0.98275	-0.025104	7	0.000636972	0.00143619	2.84279	0.0142196	TRUE
EMMphlox-Control	SPBC1105.14	1.02753	0.0391873	1.04197	0.0593084	1.03023	0.042968	1.0432	0.0610098	7	0.0169404	0.0243901	1.61279	0.0227214	TRUE
EMMphlox-Control	SPBC119.03	0.984209	-0.0229641	0.998031	-0.00284294	0.985796	-0.0206384	0.998202	-0.00259667	7	2.70334e-12	1.61524e-10	9.79176	0.00196481	FALSE
EMMphlox-Control	SPBC119.16c	0.984478	-0.0225698	0.998304	-0.0024487	0.980585	-0.0282859	0.992924	-0.0102441	7	0.00623672	0.0100715	1.99691	0.0105759	TRUE
EMMphlox-Control	SPBC1198.07c	0.975207	-0.0362193	0.988904	-0.0160982	0.976119	-0.0348705	0.988403	-0.0168287	7	0.000503307	0.00119808	2.92152	0.011139	TRUE
EMMphlox-Control	SPBC1198.11c	0.992014	-0.0115673	1.00595	0.00855381	0.998062	-0.00279915	1.01062	0.0152426	7	0.362364	0.39727	0.400914	0.0213868	FALSE
EMMphlox-Control	SPBC1198.14c	0.997548	-0.00354201	1.01156	0.0165791	1.00003	4.96767e-05	1.01262	0.0180915	7	0.621602	0.64313	0.191701	0.0119253	FALSE
EMMphlox-Control	SPBC11B10.10c	0.99066	-0.0135386	1.00457	0.00658256	0.986948	-0.0189547	0.999367	-0.000912874	7	0.138938	0.161195	0.79265	0.0143517	FALSE
EMMphlox-Control	SPBC14C8.15	0.964397	-0.0523013	0.977941	-0.0321801	0.969674	-0.0444282	0.981877	-0.0263864	7	9.97978e-05	0.00035076	3.45499	0.0123616	TRUE
EMMphlox-Control	SPBC14C8.16c	1.08027	0.111386	1.09544	0.131507	1.0828	0.114766	1.09643	0.132807	7	0.00334222	0.00596112	2.22467	0.0461308	TRUE
EMMphlox-Control	SPBC14F5.10c	0.972103	-0.0408196	0.985755	-0.0206985	0.97264	-0.0400219	0.98488	-0.0219801	7	2.12012e-10	7.23869e-09	8.14034	0.00479237	TRUE
EMMphlox-Control	SPBC1539.02	0.976757	-0.0339289	0.990475	-0.0138078	0.977986	-0.0321143	0.990293	-0.0140725	7	3.83525e-07	3.27366e-06	5.48497	0.00584876	TRUE
EMMphlox-Control	SPBC15C4.06c	0.985301	-0.0213632	0.999139	-0.00124211	0.98546	-0.021131	0.997861	-0.00308926	7	0.00549327	0.00918106	2.03711	0.00980994	FALSE
EMMphlox-Control	SPBC15D4.05	0.974858	-0.0367365	0.988549	-0.0166154	0.978118	-0.0319188	0.990427	-0.0138771	6	1.57696e-07	1.63867e-06	5.78551	0.00507194	TRUE
EMMphlox-Control	SPBC1604.16c	0.983841	-0.0235029	0.997659	-0.00338179	0.985861	-0.020544	0.998267	-0.00250222	7	4.48252e-05	0.000178554	3.74823	0.00604191	FALSE
EMMphlox-Control	SPBC16A3.02c	0.986867	-0.0190731	1.00073	0.00104807	0.98723	-0.0185415	0.999654	-0.000499751	7	0.000128304	0.000420064	3.37668	0.00545926	FALSE
EMMphlox-Control	SPBC16A3.08c	0.981906	-0.0263425	0.995697	-0.00622136	0.985687	-0.0207978	0.998092	-0.002756	7	0.0159037	0.0230362	1.63759	0.0147959	FALSE
EMMphlox-Control	SPBC16C6.01c	1.00394	0.00566729	1.01804	0.0257884	1.01105	0.0158481	1.02377	0.0338899	7	0.482293	0.510036	0.292399	0.0134964	FALSE
EMMphlox-Control	SPBC16D10.08c	0.96616	-0.0496664	0.979729	-0.0295453	0.969151	-0.0452072	0.981347	-0.0271654	7	4.86345e-08	5.81182e-07	6.23569	0.00669254	TRUE
EMMphlox-Control	SPBC16E9.13	0.987992	-0.0174284	1.00187	0.00269278	0.995717	-0.00619275	1.00825	0.011849	7	0.166522	0.190425	0.720276	0.0202069	FALSE
EMMphlox-Control	SPBC16E9.16c	0.994148	-0.00846737	1.00811	0.0116538	0.990845	-0.0132693	1.00331	0.00477247	7	0.390708	0.42253	0.374142	0.0165087	FALSE
EMMphlox-Control	SPBC16H5.13	1.01052	0.0151006	1.02471	0.0352218	1.02047	0.0292399	1.03332	0.0472817	7	0.1128	0.133461	0.874645	0.0149274	FALSE
EMMphlox-Control	SPBC16H5.14c	0.973335	-0.0389924	0.987005	-0.0188712	0.976665	-0.0340642	0.988956	-0.0160224	7	1.1291e-08	1.58738e-07	6.79932	0.00541516	TRUE
EMMphlox-Control	SPBC1709.09	1.00577	0.00829402	1.01989	0.0284152	1.00089	0.00128131	1.01348	0.0193231	7	0.380127	0.413021	0.384028	0.0158492	FALSE
EMMphlox-Control	SPBC1778.07	0.995144	-0.00702232	1.00912	0.0130988	0.996624	-0.00487886	1.00917	0.0131629	7	0.123515	0.145419	0.837378	0.00640875	FALSE
EMMphlox-Control	SPBC17G9.07	1.08648	0.119665	1.10174	0.139787	1.08049	0.11168	1.09408	0.129721	7	0.00964751	0.0148621	1.82792	0.0621897	TRUE
EMMphlox-Control	SPBC17G9.09	0.988506	-0.0166791	1.00239	0.00344205	0.993304	-0.00969266	1.0058	0.00834912	7	0.00680032	0.0109079	1.96226	0.00796161	FALSE
EMMphlox-Control	SPBC1861.02	1.0091	0.0130674	1.02327	0.0331885	1.01278	0.0183169	1.02552	0.0363587	7	0.125467	0.146994	0.832701	0.0133722	FALSE
EMMphlox-Control	SPBC18A7.01	0.976854	-0.0337845	0.990574	-0.0136634	0.979738	-0.0295324	0.992067	-0.0114906	7	1.09643e-06	8.18895e-06	5.08677	0.00619185	TRUE
EMMphlox-Control	SPBC18E5.10	1.01501	0.0214943	1.02927	0.0416154	1.02634	0.0375146	1.03926	0.0555564	7	0.0887698	0.108245	0.965593	0.0196884	FALSE
EMMphlox-Control	SPBC18H10.02	1.12499	0.16991	1.14079	0.190031	1.12769	0.173377	1.14189	0.191419	7	0.000268631	0.000737963	3.13197	0.0446697	TRUE
EMMphlox-Control	SPBC18H10.04c	0.991055	-0.0129625	1.00497	0.00715859	0.995425	-0.00661481	1.00795	0.011427	7	0.223219	0.250466	0.601251	0.0173097	FALSE
EMMphlox-Control	SPBC18H10.05	0.976125	-0.0348627	0.989834	-0.0147415	0.976225	-0.0347148	0.98851	-0.016673	7	4.82701e-06	3.03593e-05	4.51771	0.00696623	TRUE
EMMphlox-Control	SPBC19C7.01	0.986727	-0.0192777	1.00058	0.000843402	0.989019	-0.0159305	1.00146	0.00211124	7	0.019913	0.0281611	1.55035	0.0114203	FALSE
EMMphlox-Control	SPBC1D7.03	0.964081	-0.0527744	0.977621	-0.0326533	0.96927	-0.0450293	0.981468	-0.0269875	6	0.0186761	0.026569	1.57563	0.0262573	TRUE
EMMphlox-Control	SPBC20F10.02c	0.998555	-0.00208558	1.01258	0.0180356	1.00299	0.00430354	1.01561	0.0223453	7	0.71785	0.730068	0.136636	0.00928898	FALSE
EMMphlox-Control	SPBC20F10.03	0.98297	-0.0247811	0.996775	-0.00465998	0.98159	-0.0268078	0.993942	-0.00876606	7	0.00011625	0.000391319	3.40747	0.00688832	TRUE
EMMphlox-Control	SPBC21.03c	0.979528	-0.0298412	0.993285	-0.00972006	0.987169	-0.0186305	0.999592	-0.000588745	7	0.00262059	0.00474485	2.32378	0.0118851	FALSE
EMMphlox-Control	SPBC215.05	1.01836	0.026248	1.03266	0.0463691	1.02193	0.0312983	1.03479	0.0493401	7	0.0251038	0.0338972	1.46984	0.0166962	TRUE
EMMphlox-Control	SPBC215.06c	0.977092	-0.0334337	0.990815	-0.0133126	0.9821	-0.0260579	0.994459	-0.00801615	7	0.000247223	0.000703408	3.15279	0.00955785	TRUE
EMMphlox-Control	SPBC21C3.03	0.963768	-0.0532422	0.977304	-0.0331211	0.964194	-0.0526045	0.976328	-0.0345627	7	0.000233336	0.000671894	3.1727	0.0139431	TRUE
EMMphlox-Control	SPBC21C3.08c	0.975948	-0.0351233	0.989655	-0.0150021	0.976702	-0.0340103	0.988993	-0.0159685	7	2.28619e-13	4.90516e-11	10.3093	0.00348613	TRUE
EMMphlox-Control	SPBC21C3.14c	0.984962	-0.0218597	0.998796	-0.00173857	0.989149	-0.0157405	1.0016	0.00230126	7	3.08388e-05	0.000139065	3.85678	0.00548615	FALSE
EMMphlox-Control	SPBC21C3.18	0.995633	-0.00631348	1.00962	0.0138077	0.993751	-0.00904394	1.00626	0.00899785	7	0.291817	0.32289	0.490946	0.00937693	FALSE
EMMphlox-Control	SPBC25B2.04c	1.00576	0.00828755	1.01989	0.0284087	1.00955	0.0137136	1.02226	0.0317554	7	0.226229	0.252658	0.597467	0.0108687	FALSE
EMMphlox-Control	SPBC25H2.14	1.00413	0.00595151	1.01824	0.0260726	1.00275	0.0039599	1.01537	0.0220017	7	0.489508	0.515385	0.287868	0.0145031	FALSE
EMMphlox-Control	SPBC28F2.03	0.988944	-0.0160386	1.00283	0.00408257	0.991491	-0.012328	1.00397	0.00571381	7	0.00615007	0.0100676	1.99708	0.00751169	FALSE
EMMphlox-Control	SPBC2D10.03c	0.978294	-0.0316594	0.992034	-0.0115382	0.980648	-0.0281921	0.992989	-0.0101503	7	0.000104205	0.000360944	3.44256	0.00834632	TRUE
EMMphlox-Control	SPBC2D10.05	0.982058	-0.0261196	0.995851	-0.00599848	0.983869	-0.0234622	0.99625	-0.00542045	7	2.78809e-09	6.05775e-08	7.21769	0.00373939	TRUE
EMMphlox-Control	SPBC2G2.06c	0.979196	-0.0303301	0.992949	-0.0102089	0.981126	-0.0274903	0.993472	-0.0094485	7	1.08895e-08	1.58738e-07	6.79932	0.00453508	TRUE
EMMphlox-Control	SPBC30D10.10c	1.0764	0.106214	1.09152	0.126336	1.07295	0.101576	1.08645	0.119618	7	0.00111799	0.00245138	2.61059	0.0356433	TRUE
EMMphlox-Control	SPBC30D10.13c	1.08488	0.117533	1.10011	0.137654	1.08818	0.121919	1.10188	0.139961	7	2.39471e-07	2.2013e-06	5.65732	0.0127607	TRUE
EMMphlox-Control	SPBC31E1.01c	0.971907	-0.0411096	0.985557	-0.0209884	0.97972	-0.0295593	0.992048	-0.0115175	7	0.0241249	0.0327606	1.48465	0.0252447	TRUE
EMMphlox-Control	SPBC32F12.03c	0.991522	-0.0122839	1.00545	0.00783728	0.996002	-0.00577947	1.00854	0.0122623	7	0.043012	0.0558688	1.25283	0.00862563	FALSE
EMMphlox-Control	SPBC32H8.03	0.970419	-0.0433209	0.984048	-0.0231997	0.974018	-0.0379802	0.986275	-0.0199385	7	0.000459335	0.00112021	2.9507	0.0128202	TRUE
EMMphlox-Control	SPBC36.07	1.06899	0.096244	1.084	0.116365	1.07081	0.0987049	1.08429	0.116747	7	0.000191306	0.000597501	3.22366	0.0239795	TRUE
EMMphlox-Control	SPBC365.12c	0.997355	-0.00382102	1.01136	0.0163001	0.994685	-0.00768891	1.0072	0.0103529	7	0.567222	0.590488	0.228789	0.0109531	FALSE
EMMphlox-Control	SPBC365.20c	0.976768	-0.0339116	0.990487	-0.0137905	0.977644	-0.0326189	0.989947	-0.0145772	7	0.000440045	0.00108424	2.96488	0.0103557	TRUE
EMMphlox-Control	SPBC3B8.02	1.10513	0.144213	1.12065	0.164334	1.12575	0.170892	1.13992	0.188934	7	0.000264678	0.000735558	3.13338	0.0376695	TRUE
EMMphlox-Control	SPBC3B8.08	0.985749	-0.0207071	0.999594	-0.000585981	0.986593	-0.0194737	0.999008	-0.00143191	7	7.41383e-05	0.00027686	3.55774	0.00562175	FALSE
EMMphlox-Control	SPBC3E7.07c	0.989198	-0.0156684	1.00309	0.00445271	0.990246	-0.014141	1.00271	0.00390081	7	0.00115255	0.00248161	2.60527	0.00568807	FALSE
EMMphlox-Control	SPBC3H7.03c	1.08705	0.120419	1.10232	0.14054	1.06485	0.0906474	1.07825	0.108689	7	0.00146233	0.00288841	2.53934	0.0425646	TRUE
EMMphlox-Control	SPBC3H7.10	1.09166	0.126529	1.107	0.14665	1.09002	0.124355	1.10374	0.142397	7	0.00167927	0.00321077	2.49339	0.045973	TRUE
EMMphlox-Control	SPBC409.07c	1.10971	0.150188	1.1253	0.170309	1.09505	0.130995	1.10883	0.149037	7	0.00155289	0.0030174	2.52037	0.054085	TRUE
EMMphlox-Control	SPBC428.08c	0.994998	-0.0072344	1.00897	0.0128867	0.998264	-0.00250733	1.01083	0.0155345	5	0.322685	0.3554	0.449283	0.00965038	FALSE
EMMphlox-Control	SPBC428.15	0.965556	-0.0505682	0.979117	-0.030447	0.965147	-0.0511794	0.977293	-0.0331377	6	0.00127421	0.0026094	2.58346	0.0143284	TRUE
EMMphlox-Control	SPBC4F6.08c	0.986223	-0.0200147	1.00007	0.000106438	0.986377	-0.0197884	0.99879	-0.0017466	7	0.0600164	0.0750991	1.12437	0.0158572	FALSE
EMMphlox-Control	SPBC543.07	0.9786	-0.0312085	0.992344	-0.0110873	0.988379	-0.0168631	1.00082	0.00117872	7	0.0209625	0.0289597	1.53821	0.0186144	FALSE
EMMphlox-Control	SPBC646.09c	1.09204	0.127029	1.10738	0.14715	1.09186	0.126783	1.1056	0.144825	7	0.00390692	0.00681572	2.16649	0.0545299	TRUE
EMMphlox-Control	SPBC646.13	0.969569	-0.0445847	0.983186	-0.0244636	0.970471	-0.0432425	0.982684	-0.0252007	7	2.01008e-07	1.92163e-06	5.71633	0.00675239	TRUE
EMMphlox-Control	SPBC649.04	0.978381	-0.031532	0.992122	-0.0114109	0.976861	-0.0337745	0.989154	-0.0157327	7	0.00120494	0.00254851	2.59371	0.0111123	TRUE
EMMphlox-Control	SPBC660.10	0.975993	-0.0350575	0.9897	-0.0149364	0.978366	-0.0315535	0.990678	-0.0135117	7	3.03676e-06	1.96159e-05	4.70739	0.00677701	TRUE
EMMphlox-Control	SPBC685.04c	0.986137	-0.0201395	0.999987	-1.83875e-05	0.986936	-0.0189719	0.999356	-0.000930072	7	0.0607827	0.0756618	1.12112	0.0160201	FALSE
EMMphlox-Control	SPBC691.03c	0.969496	-0.044693	0.983112	-0.0245719	0.968969	-0.0454768	0.981163	-0.0274351	6	6.69691e-10	2.0007e-08	7.69882	0.00453089	TRUE
EMMphlox-Control	SPBC725.11c	0.983424	-0.0241138	0.997236	-0.00399269	0.982284	-0.0257883	0.994645	-0.00774652	7	0.0101027	0.0153793	1.81306	0.0123438	TRUE
EMMphlox-Control	SPBC776.01	0.975987	-0.035066	0.989695	-0.0149448	0.981909	-0.0263389	0.994265	-0.00829709	7	1.2133e-05	6.39398e-05	4.19423	0.00748476	TRUE
EMMphlox-Control	SPBC947.05c	0.987245	-0.0185203	1.00111	0.00160084	0.989581	-0.0151107	1.00203	0.00293104	7	1.39159e-06	1.00785e-05	4.9966	0.00359915	FALSE
EMMphlox-Control	SPBC947.09	0.989862	-0.0147012	1.00376	0.00541991	0.984008	-0.0232584	0.996391	-0.00521666	7	0.160766	0.184727	0.733471	0.01669	FALSE
EMMphlox-Control	SPBC9B6.03	0.983684	-0.0237338	0.997499	-0.00361266	0.985727	-0.0207407	0.998131	-0.00269888	7	0.0378679	0.0497276	1.3034	0.0164878	FALSE
EMMphlox-Control	SPBP22H7.04	0.973054	-0.039408	0.98672	-0.0192868	0.97305	-0.0394143	0.985295	-0.0213726	7	7.99707e-08	9.10142e-07	6.04089	0.0059608	TRUE
EMMphlox-Control	SPBP35G2.11c	0.983875	-0.0234525	0.997694	-0.00333135	0.985792	-0.0206451	0.998197	-0.00260335	7	0.00195637	0.0036529	2.43736	0.0091104	FALSE
EMMphlox-Control	SPBP8B7.27	0.994851	-0.00744741	1.00882	0.0126737	0.998151	-0.00267006	1.01071	0.0153717	7	0.0502749	0.0642551	1.19209	0.00473645	FALSE
EMMphlox-Control	SPBP8B7.31	0.969864	-0.0441451	0.983486	-0.0240239	0.974668	-0.0370172	0.986933	-0.0189754	7	2.07445e-05	0.000101182	3.99489	0.00925079	TRUE
EMMphlox-Control	SPBPB21E7.04c	0.990949	-0.0131166	1.00487	0.00700455	0.995792	-0.0060839	1.00832	0.0119579	7	0.0240444	0.0327606	1.48465	0.00797662	FALSE
EMMphlox-Control	SPBPJ4664.05	0.984083	-0.0231488	0.997904	-0.00302768	0.985615	-0.0209036	0.998018	-0.00286179	7	2.66144e-09	6.05775e-08	7.21769	0.00324143	FALSE
EMMphlox-Control	SPCC1020.08	0.97839	-0.0315188	0.992131	-0.0113977	0.976091	-0.0349123	0.988374	-0.0168705	7	0.00038839	0.00100897	2.99612	0.00958768	TRUE
EMMphlox-Control	SPCC1235.03	0.975152	-0.0363015	0.988847	-0.0161803	0.97835	-0.0315768	0.990662	-0.013535	7	1.46364e-06	1.02886e-05	4.98765	0.00662597	TRUE
EMMphlox-Control	SPCC1259.02c	1.0876	0.121151	1.10288	0.141273	1.09556	0.131668	1.10935	0.14971	7	0.00175281	0.00332477	2.47824	0.0443267	TRUE
EMMphlox-Control	SPCC126.12	0.979235	-0.0302728	0.992988	-0.0101516	0.980423	-0.0285244	0.99276	-0.0104827	7	0.000532118	0.00123472	2.90843	0.00962373	TRUE
EMMphlox-Control	SPCC1393.13	0.983694	-0.0237182	0.99751	-0.00359704	0.990882	-0.0132152	1.00335	0.00482662	7	0.0929908	0.112247	0.949827	0.0217745	FALSE
EMMphlox-Control	SPCC13B11.01	1.06801	0.0949306	1.08301	0.115052	1.06391	0.0893705	1.07729	0.107412	7	0.00784282	0.0122512	1.91182	0.0467747	TRUE
EMMphlox-Control	SPCC1494.08c	0.987385	-0.0183147	1.00125	0.00180645	0.987735	-0.0178034	1.00017	0.000238425	7	0.0145112	0.0214085	1.66941	0.0101253	FALSE
EMMphlox-Control	SPCC162.12	0.985619	-0.0208981	0.999462	-0.000776962	0.98801	-0.0174019	1.00044	0.000639886	7	1.03881e-05	5.77388e-05	4.23853	0.00482257	FALSE
EMMphlox-Control	SPCC1620.03	0.985404	-0.0212123	0.999244	-0.00109115	0.98556	-0.0209849	0.997962	-0.00294312	7	0.0148474	0.0217066	1.66341	0.0117809	FALSE
EMMphlox-Control	SPCC16A11.08	0.986425	-0.0197191	1.00028	0.00040202	0.990693	-0.0134903	1.00316	0.00455151	7	0.0051854	0.00872754	2.05911	0.00898642	FALSE
EMMphlox-Control	SPCC16C4.11	1.06193	0.0866838	1.07684	0.106805	1.06427	0.089864	1.07766	0.107906	7	0.00126633	0.0026094	2.58346	0.0297417	TRUE
EMMphlox-Control	SPCC1753.02c	1.05237	0.073644	1.06715	0.0937652	1.05723	0.0802885	1.07053	0.0983302	7	0.000644255	0.00143904	2.84193	0.022563	TRUE
EMMphlox-Control	SPCC188.02	1.09554	0.131648	1.11093	0.151769	1.09204	0.127022	1.10578	0.145063	7	0.000209923	0.000619404	3.20803	0.0330463	TRUE
EMMphlox-Control	SPCC18B5.03	0.966159	-0.0496682	0.979728	-0.029547	0.967635	-0.0474645	0.979812	-0.0294227	7	4.10473e-13	4.90516e-11	10.3093	0.00446832	TRUE
EMMphlox-Control	SPCC24B10.18	0.957381	-0.0628349	0.970827	-0.0427137	0.956297	-0.0644687	0.968332	-0.0464269	7	8.5308e-06	4.97283e-05	4.3034	0.0109751	TRUE
EMMphlox-Control	SPCC320.03	0.952341	-0.0704494	0.965717	-0.0503283	0.953517	-0.0686699	0.965516	-0.0506281	6	4.68834e-09	9.33762e-08	7.02976	0.00606389	TRUE
EMMphlox-Control	SPCC320.07c	0.983279	-0.0243269	0.997089	-0.00420577	0.985268	-0.0214115	0.997667	-0.00336973	7	9.9739e-06	5.67562e-05	4.24599	0.00553571	FALSE
EMMphlox-Control	SPCC338.04	0.992318	-0.0111253	1.00625	0.00899588	0.994066	-0.00858653	1.00658	0.00945525	7	0.0540493	0.0679883	1.16757	0.00825385	FALSE
EMMphlox-Control	SPCC4B3.03c	0.993025	-0.0100979	1.00697	0.0100232	0.994531	-0.00791233	1.00705	0.0101295	7	0.0142926	0.0212169	1.67332	0.00512286	FALSE
EMMphlox-Control	SPCC4B3.12	0.993284	-0.00972228	1.00723	0.0103989	0.995585	-0.00638354	1.00811	0.0116582	7	0.112015	0.133192	0.875522	0.00915711	FALSE
EMMphlox-Control	SPCC4G3.09c	0.981419	-0.0270585	0.995203	-0.00693738	0.98075	-0.0280434	0.993091	-0.0100016	6	0.00362585	0.0064191	2.19253	0.00991485	TRUE
EMMphlox-Control	SPCC4G3.12c	0.985607	-0.0209158	0.999449	-0.000794697	0.990402	-0.0139136	1.00287	0.0041282	7	0.468628	0.497787	0.302957	0.0497643	FALSE
EMMphlox-Control	SPCC4G3.17	0.979927	-0.0292541	0.993689	-0.00913301	0.980726	-0.0280775	0.993068	-0.0100358	7	0.000180068	0.000573818	3.24123	0.00827065	TRUE
EMMphlox-Control	SPCC553.01c	1.07977	0.110727	1.09494	0.130848	1.0833	0.115429	1.09693	0.133471	7	0.000206786	0.000619404	3.20803	0.0277897	TRUE
EMMphlox-Control	SPCC5E4.10c	0.983647	-0.023788	0.997462	-0.00366685	0.984442	-0.0226224	0.99683	-0.00458067	7	6.61672e-05	0.000252904	3.59704	0.00631483	TRUE
EMMphlox-Control	SPCC613.03	0.98788	-0.0175919	1.00175	0.00252921	0.990932	-0.0131416	1.0034	0.00490015	7	2.72092e-05	0.000129481	3.88779	0.00432536	FALSE
EMMphlox-Control	SPCC622.11	0.986764	-0.0192229	1.00062	0.000898275	0.989934	-0.0145951	1.00239	0.0034467	7	0.0429673	0.0558688	1.25283	0.0138039	FALSE
EMMphlox-Control	SPCC63.03	0.987313	-0.0184213	1.00118	0.00169987	0.987401	-0.0182924	0.999826	-0.000250618	7	0.013342	0.0199296	1.7005	0.0100092	FALSE
EMMphlox-Control	SPCC63.06	0.975828	-0.035301	0.989533	-0.0151798	0.976637	-0.0341053	0.988927	-0.0160636	7	1.23064e-05	6.39398e-05	4.19423	0.00752976	TRUE
EMMphlox-Control	SPCC663.06c	0.970274	-0.0435356	0.983901	-0.0234145	0.968508	-0.0461645	0.980696	-0.0281228	7	3.86295e-08	4.85918e-07	6.31344	0.00612347	TRUE
EMMphlox-Control	SPCC736.13	0.979299	-0.0301789	0.993053	-0.0100577	0.97609	-0.0349145	0.988373	-0.0168727	7	0.00715255	0.0113601	1.94462	0.0143188	TRUE
EMMphlox-Control	SPCC794.03	0.974077	-0.0378927	0.987757	-0.0177716	0.978982	-0.030646	0.991301	-0.0126043	7	0.000224553	0.000654491	3.1841	0.0104776	TRUE
EMMphlox-Control	SPCC962.05	0.983718	-0.023684	0.997533	-0.00356288	0.980794	-0.0279781	0.993136	-0.00993632	7	0.00804568	0.0124865	1.90356	0.011608	TRUE
EMMphlox-Control	SPCC965.12	0.981613	-0.0267732	0.9954	-0.00665211	0.984849	-0.0220249	0.997243	-0.00398317	7	0.000114331	0.000390357	3.40854	0.00734317	TRUE
EMMphlox-Control	SPCP31B10.02	0.977947	-0.0321717	0.991682	-0.0120506	0.981377	-0.0271206	0.993727	-0.00907877	7	0.00124081	0.00260134	2.5848	0.0113599	TRUE

## Sheet: growth_stresses
strain_id	condition_short	mean_effect_size	mean_effect_size_log2	mean_fitness	mean_fitness_log2	median_effect_size	median_effect_size_log2	median_fitness	median_fitness_log2	observation_count	p_Welch	p_Welch_BH	p_Welch_BH_-log10	stdev_fitness	is_hit
972	EMM-3AT4	0.998472	-0.00220554	1.01078	0.0154681	1.00031	0.000440471	1.00858	0.0123224	29	0.875279	0.938362	0.0276294	0.0426597	FALSE
972	EMM-3AT6	0.982928	-0.0248419	0.995044	-0.00716824	0.992505	-0.0108533	1.00071	0.00102856	32	0.248491	0.482607	0.316406	0.0768784	FALSE
972	EMM-Bleo200	0.999702	-0.000430633	1.01202	0.017243	0.994198	-0.00839515	1.00242	0.00348674	33	0.968999	0.97307	0.0118559	0.0296582	FALSE
972	EMM-Canav60	0.954161	-0.0676956	0.965922	-0.050022	0.971882	-0.0411472	0.979919	-0.0292654	33	0.00212189	0.0315631	1.50082	0.0747398	FALSE
972	EMM-Cys	0.975005	-0.0365184	0.987023	-0.0188447	0.973971	-0.0380498	0.982025	-0.0261679	66	0.00270128	0.043526	1.36125	0.0484404	FALSE
972	EMM-Met	0.984057	-0.0231858	0.996187	-0.00551217	0.976944	-0.0336519	0.985023	-0.02177	66	0.188466	0.938401	0.0276114	0.0871618	FALSE
972	EMMphlox-Act0.1	1.00578	0.00831769	1.02526	0.0359927	1.0107	0.0153549	1.02713	0.0386237	44	0.314319	0.658688	0.18132	0.0335464	FALSE
972	EMMphlox-Act1	0.992826	-0.0103872	1.01206	0.0172879	0.992676	-0.0106051	1.00882	0.0126636	43	0.18983	0.657526	0.182087	0.0309587	FALSE
972	EMMphlox-Act2	0.997452	-0.0036803	1.01677	0.0239947	1.00164	0.00237064	1.01793	0.0256394	44	0.606747	0.943955	0.0250488	0.02736	FALSE
972	EMMphlox-Cana75	1.001	0.00144561	1.02039	0.0291206	1.00176	0.00254041	1.01805	0.0258092	66	0.806937	0.918175	0.0370745	0.0245993	FALSE
972	EMMphlox-EtOH0.1	1.01204	0.0172705	1.03164	0.0449455	1.01356	0.0194382	1.03004	0.0427069	44	0.0277573	0.414625	0.382345	0.0308976	FALSE
972	YES-Bleo200	0.994686	-0.00768713	0.998557	-0.0020831	0.99603	-0.00573898	0.998937	-0.00153384	33	0.430451	0.627243	0.202564	0.0376816	FALSE
972	YES-Bleo300	1.00774	0.0111217	1.01166	0.0167258	1.00354	0.00509113	1.00646	0.00929627	11	0.331053	0.331053	0.480102	0.0249252	FALSE
972	YES-Bleo600	1.00738	0.0106131	1.0113	0.0162171	0.998955	-0.00150792	1.00187	0.00269722	22	0.14971	0.398532	0.399536	0.0225567	FALSE
972	YES-Bortezomib100	1.04625	0.0652325	1.05033	0.0708366	1.03903	0.0552442	1.04207	0.0594494	32	1.32002e-09	4.48807e-08	7.34794	0.0312143	FALSE
972	YES-Bortezomib200	1.02299	0.0327966	1.02697	0.0384006	1.02236	0.0319056	1.02535	0.0361107	33	2.07551e-05	0.000407756	3.3896	0.0261979	FALSE
972	YES-Bref60	1.13818	0.186729	1.14261	0.192333	1.1557	0.208761	1.15907	0.212967	31	2.80774e-05	0.000711294	3.14795	0.156489	TRUE
972	YES-Calco10KCl0.5	0.98216	-0.0259706	0.985982	-0.0203665	1.00081	0.00117441	1.00374	0.00537955	33	0.196184	0.343415	0.464181	0.0776112	FALSE
972	YES-Calco2	0.972993	-0.039499	0.97678	-0.033895	0.978667	-0.0311104	0.981524	-0.0269053	33	0.000103746	0.00617288	2.20951	0.0347973	FALSE
972	YES-Calco4KCl0.5	0.999816	-0.000265153	1.00371	0.00533888	0.997588	-0.00348449	1.0005	0.000720653	33	0.95889	0.981053	0.00830761	0.0190258	FALSE
972	YES-Cana120	0.980009	-0.0291336	0.983823	-0.0235296	0.980093	-0.0290092	0.982954	-0.0248041	33	0.000189616	0.00755302	2.12188	0.0268017	FALSE
972	YES-Cana60	0.984776	-0.0221332	0.988608	-0.0165291	0.988365	-0.0168838	0.99125	-0.0126787	33	0.000134655	0.00268188	2.57156	0.0195089	FALSE
972	YES-CoCl0.25	0.989726	-0.0148991	0.993578	-0.00929505	0.996519	-0.00503125	0.999428	-0.000826105	33	0.0267942	0.148926	0.827029	0.0246134	FALSE
972	YES-CoCl5	1.00016	0.00023657	1.00406	0.0058406	1.00127	0.00182705	1.00419	0.00603219	32	0.958313	0.974625	0.0111627	0.016119	FALSE
972	YES-Cycloh100	0.999236	-0.00110195	1.00313	0.00450208	0.999146	-0.00123319	1.00206	0.00297195	32	0.79099	0.945233	0.024461	0.0145136	FALSE
972	YES-Cycloh200	0.997215	-0.00402304	1.0011	0.00158099	0.997089	-0.00420514	1	0	33	0.438174	0.780923	0.107392	0.0191108	FALSE
972	YES-Cycloh400	0.995346	-0.00672964	0.99922	-0.00112561	0.995964	-0.00583398	0.998872	-0.00162884	33	0.248461	0.755143	0.121971	0.0216642	FALSE
972	YES-Cycloh600	1.00234	0.00337094	1.00624	0.00897498	1.00168	0.00241706	1.0046	0.0066222	33	0.6332	0.854928	0.0680703	0.0270215	FALSE
972	YES-Dhcumarin100	0.997228	-0.00400465	1.00111	0.00159939	0.996319	-0.00532082	0.999227	-0.00111568	32	0.492539	0.756503	0.121189	0.0214961	FALSE
972	YES-Dhcumarin200	1.00752	0.0108021	1.01144	0.0164062	1.00684	0.00982738	1.00977	0.0140325	31	0.0546308	0.324322	0.489023	0.0199162	FALSE
972	YES-Dhcumarin50	0.999465	-0.000772321	1.00335	0.00483171	0.998551	-0.00209176	1.00147	0.00211338	32	0.899692	0.942635	0.0256564	0.0227925	FALSE
972	YES-EDTA0.1	0.993587	-0.00928134	0.997454	-0.0036773	0.996458	-0.00511933	0.999367	-0.000914186	33	0.0511019	0.19699	0.705557	0.0168813	FALSE
972	YES-EDTA0.3	0.980897	-0.0278264	0.984715	-0.0222223	0.976047	-0.0349771	0.978896	-0.0307719	33	0.000996756	0.0158817	1.7991	0.0298327	FALSE
972	YES-EDTA0.6	0.972653	-0.0400027	0.976439	-0.0343987	0.973502	-0.0387442	0.976344	-0.0345391	33	3.26964e-07	6.01111e-06	5.22105	0.0244521	FALSE
972	YES-EtOH5	1.03549	0.0503166	1.03952	0.0559206	1.03497	0.0495822	1.03799	0.0537873	32	7.17088e-06	0.000155804	3.80742	0.0372593	FALSE
972	YES-Forma2	1.01658	0.0237198	1.02053	0.0293239	1.00896	0.0128623	1.0119	0.0170674	33	0.00323965	0.016474	1.7832	0.0293865	FALSE
972	YES-Forma3	1.00341	0.00491023	1.00731	0.0105143	1.00162	0.00233593	1.00454	0.00654107	33	0.544418	0.6707	0.173472	0.0312464	FALSE
972	YES-HU30	0.983424	-0.0241142	0.987252	-0.0185101	0.988169	-0.0171699	0.991054	-0.0129647	33	0.000890957	0.0101399	1.99396	0.0254183	FALSE
972	YES-HU45	1.00654	0.0093982	1.01045	0.0150022	1.00909	0.013057	1.01204	0.0172621	33	0.277883	0.488339	0.311278	0.0333732	FALSE
972	YES-KCl0.5SDS0.01	0.967942	-0.0470081	0.971709	-0.041404	0.977472	-0.0328722	0.980326	-0.0286671	32	3.84657e-07	4.57742e-05	4.33938	0.0283381	FALSE
972	YES-KCl1SDS0.01	0.981132	-0.0274806	0.984951	-0.0218765	0.993882	-0.00885326	0.996783	-0.00464812	33	0.00225371	0.024381	1.61295	0.0321954	FALSE
972	YES-Ovana6	1.03391	0.0481084	1.03793	0.0537124	1.0299	0.0425083	1.03291	0.0467135	19	0.00550695	0.110751	0.955653	0.0469044	FALSE
972	YES-SDS0.01	0.988598	-0.0165435	0.992446	-0.0109395	0.985441	-0.0211584	0.988318	-0.0169533	39	0.140836	0.744868	0.127921	0.0468852	FALSE
972	YES-SDS0.02	1.06868	0.0958345	1.07284	0.101439	1.05142	0.072343	1.05449	0.0765481	31	1.87622e-07	5.50358e-06	5.25935	0.0571246	TRUE
972	YES-TBH15	0.868747	-0.202991	0.872129	-0.197387	0.840003	-0.251533	0.842455	-0.247328	11	0.0167641	0.0167641	1.77562	0.152431	TRUE
972	YES-UV1000	0.994101	-0.00853612	0.99797	-0.00293208	0.997089	-0.00420514	1	0	33	0.533201	0.943223	0.0253856	0.0535093	FALSE
972	YES-UV10m	0.994259	-0.00830605	0.998129	-0.00270202	0.997089	-0.00420514	1	0	31	0.297239	0.550356	0.259356	0.0294299	FALSE
972	YES-UV2000	1.0227	0.0323845	1.02668	0.0379885	1.00689	0.00990115	1.00983	0.0141063	32	0.136617	0.786899	0.104081	0.0840741	FALSE
972	YES-UV20m	1.01935	0.0276456	1.02331	0.0332497	1.01817	0.025975	1.02114	0.0301802	32	2.78078e-06	6.04187e-05	4.21883	0.0188539	FALSE
972	YES-UV3000	0.985755	-0.0206983	0.989592	-0.0150943	0.991756	-0.0119424	0.994651	-0.00773727	33	0.0696818	0.464373	0.333133	0.0432143	FALSE
972	YES-UV4000	0.98736	-0.0183524	0.991202	-0.0127483	0.992447	-0.0109378	0.995344	-0.00673263	27	0.080529	0.49593	0.30458	0.0357255	FALSE
972	YES-UV5m	0.991794	-0.0118875	0.995654	-0.00628346	0.998033	-0.00284015	1.00095	0.00136499	33	0.469148	0.728787	0.137399	0.0641853	FALSE
972	YES-UV6000	1.00472	0.00679952	1.00863	0.0124035	1.00175	0.00251568	1.00467	0.00672082	33	0.63008	0.809618	0.0917197	0.055544	FALSE
972	YES-UV9000	0.993618	-0.00923718	0.997485	-0.00363314	0.991683	-0.0120495	0.994577	-0.00784434	33	0.195269	0.474224	0.324016	0.0268875	FALSE
972	YES-VPA5	1.00056	0.000805372	1.00445	0.0064094	1.00062	0.000889281	1.00354	0.00509442	33	0.910482	0.921555	0.0354788	0.0274479	FALSE
972	YESphlox-Act0.1	1.01461	0.0209306	1.01973	0.0281852	1.00972	0.0139557	1.01544	0.022104	44	0.0184791	0.346937	0.45975	0.0390968	FALSE
972	YESphlox-Act1	1.01717	0.024561	1.0223	0.0318155	1.00631	0.0090719	1.01201	0.0172202	44	0.0154915	0.190958	0.719061	0.0448123	FALSE
972	YESphlox-Act2	0.990256	-0.0141269	0.995248	-0.0068724	0.994368	-0.00814833	1	0	32	0.336442	0.900875	0.0453353	0.0563556	FALSE
972	YESphlox-Aged7	0.99865	-0.00194843	1.00368	0.00530609	0.994708	-0.00765572	1.00034	0.000492617	66	0.594604	0.826929	0.0825319	0.0181758	FALSE
972	YESphlox-Benza12	1.01118	0.0160441	1.01628	0.0232987	1.01135	0.0162766	1.01707	0.0244249	33	0.00290098	0.0266667	1.57403	0.0191665	FALSE
972	YESphlox-Benza4	1.00307	0.00441606	1.00812	0.0116706	0.998775	-0.00176884	1.00443	0.00637949	33	0.36577	0.865911	0.0625267	0.0180783	FALSE
972	YESphlox-Benza8	1.00985	0.0141469	1.01494	0.0214015	1.00704	0.0101234	1.01275	0.0182718	33	0.0319803	0.234972	0.628984	0.0245763	FALSE
972	YESphlox-Bort500	1.03071	0.043645	1.03591	0.0508995	1.02808	0.0399537	1.0339	0.0481021	33	4.50715e-05	0.000828623	3.08164	0.0373284	FALSE
972	YESphlox-CdCl1	1.07194	0.100229	1.07735	0.107483	1.05603	0.0786553	1.06201	0.0868036	19	0.00545949	0.0608943	1.21542	0.0997842	FALSE
972	YESphlox-Diamide2	1.00671	0.00964314	1.01178	0.0168977	0.997388	-0.00377378	1.00304	0.00437456	33	0.185963	0.445753	0.350905	0.0278703	FALSE
972	YESphlox-Diamide3	1.0044	0.00633392	1.00946	0.0135884	1.01918	0.0274043	1.02495	0.0355527	22	0.718093	0.847045	0.0720933	0.0564183	FALSE
972	YESphlox-Diamide3.5	0.992144	-0.011379	0.997145	-0.00412449	0.994368	-0.00814833	1	0	33	0.243353	0.323565	0.490039	0.037576	FALSE
972	YESphlox-EDTA4	0.980543	-0.0283474	0.985486	-0.0210928	0.973302	-0.0390401	0.978815	-0.0308918	33	0.0611065	0.334239	0.475943	0.0575192	FALSE
972	YESphlox-EGTA1	0.990262	-0.0141182	0.995254	-0.00686369	0.994768	-0.00756746	1.0004	0.000580873	33	0.0472276	0.203944	0.690489	0.0264883	FALSE
972	YESphlox-EGTA10	0.921051	-0.118647	0.925694	-0.111393	0.923826	-0.114307	0.929059	-0.106159	33	0.00349915	0.104537	0.98073	0.144443	FALSE
972	YESphlox-EGTA15	1.01906	0.0272333	1.02419	0.0344878	0.994368	-0.00814833	1	0	29	0.42579	0.833387	0.0791534	0.127458	FALSE
972	YESphlox-EGTA5	0.996166	-0.00554259	1.00119	0.00171194	0.994368	-0.00814833	1	0	33	0.303117	0.611174	0.213835	0.0200607	FALSE
972	YESphlox-EtOH0.1	1.02154	0.0307458	1.02669	0.0380003	1.00818	0.0117532	1.01389	0.0199015	44	0.0155768	0.286373	0.543067	0.0565414	FALSE
972	YESphlox-EtOH10	1.01965	0.0280771	1.02479	0.0353316	1.02843	0.040442	1.03425	0.0485904	43	0.0666073	0.471683	0.32635	0.0683671	FALSE
972	YESphlox-Forma2.5	1.01746	0.0249741	1.02259	0.0322286	1.01722	0.0246281	1.02298	0.0327765	33	5.5765e-05	0.000619676	3.20784	0.0212012	FALSE
972	YESphlox-Gluc0.1Aged7	0.999541	-0.00066193	1.00458	0.00659259	0.99597	-0.00582605	1.00161	0.00232229	55	0.904961	0.949878	0.0223323	0.0270904	FALSE
972	YESphlox-Gluc0.5Aged7	1.00149	0.0021461	1.00654	0.00940063	0.994868	-0.00742353	1.0005	0.000724802	132	0.572218	0.67005	0.173893	0.027049	FALSE
972	YESphlox-Gluc1Aged7	1.00121	0.00175165	1.00626	0.00900617	0.998157	-0.00266065	1.00381	0.00548768	66	0.671418	0.806376	0.0934624	0.021156	FALSE
972	YESphlox-Glycerol2	0.99817	-0.00264222	1.0032	0.0046123	0.994368	-0.00814833	1	0	31	0.604152	0.869949	0.060506	0.0184021	FALSE
972	YESphlox-Glycerol2MMS0.0075	0.849318	-0.235624	0.853599	-0.228369	0.842538	-0.247187	0.84731	-0.239038	33	1.30058e-14	5.15895e-13	12.2874	0.065773	TRUE
972	YESphlox-Glycerol3	0.996068	-0.00568328	1.00109	0.00157124	0.994368	-0.00814833	1	0	33	0.203668	0.52341	0.281158	0.0161765	FALSE
972	YESphlox-Glycerol3MMS0.005	0.972522	-0.0401973	0.977425	-0.0329428	0.968322	-0.0464419	0.973806	-0.0382935	33	3.97208e-09	9.49328e-08	7.02258	0.0200366	FALSE
972	YESphlox-HP10	0.957222	-0.063075	0.962047	-0.0558205	0.950978	-0.0725158	0.956365	-0.0643674	55	1.96942e-05	0.00156897	2.80438	0.0677674	TRUE
972	YESphlox-HP15	0.989841	-0.0147312	0.994831	-0.00747663	0.996423	-0.00516945	1.00207	0.00297888	33	0.430853	0.593912	0.226278	0.0732056	FALSE
972	YESphlox-HP2	1.00668	0.00961126	1.01176	0.0168658	1.00418	0.00602197	1.00987	0.0141703	66	0.28794	0.659426	0.180834	0.0500198	FALSE
972	YESphlox-HP4	0.979719	-0.0295594	0.984658	-0.0223049	0.99367	-0.00916135	0.999298	-0.00101302	99	0.000288994	0.0138139	1.85968	0.0527827	FALSE
972	YESphlox-HP6	0.99305	-0.0100623	0.998056	-0.0028078	0.994368	-0.00814833	1	0	88	0.20543	0.438374	0.358156	0.0501419	FALSE
972	YESphlox-HP8	0.981319	-0.0272065	0.986266	-0.019952	0.994368	-0.00814833	1	0	88	0.128478	0.310035	0.508589	0.114226	FALSE
972	YESphlox-HU8	0.994078	-0.00856947	0.999089	-0.00131495	0.992002	-0.0115844	0.997621	-0.00343604	33	0.284239	0.406785	0.390635	0.0306739	FALSE
972	YESphlox-HU8MMS0.075	1.01491	0.0213483	1.02002	0.0286028	1.0231	0.0329467	1.02889	0.041095	33	0.0775445	0.30573	0.514662	0.0467505	FALSE
972	YESphlox-KCl0.5	0.996376	-0.00523711	1.0014	0.00201741	0.993565	-0.00931442	0.999192	-0.00116609	33	0.380752	0.545149	0.263485	0.0225537	FALSE
972	YESphlox-KCl0.5SDS0.004	1.04099	0.0579606	1.04624	0.0652151	1.03474	0.0492692	1.0406	0.0574175	33	2.20491e-05	0.000469044	3.32879	0.0474994	FALSE
972	YESphlox-KCl1	1.0088	0.0126472	1.01389	0.0199017	1.0087	0.0124944	1.01441	0.0206427	33	0.20753	0.583526	0.23394	0.0389559	FALSE
972	YESphlox-LiCl4	0.998397	-0.00231405	1.00343	0.00494047	0.998673	-0.00191573	1.00433	0.00623261	33	0.718197	0.841978	0.0746994	0.0244878	FALSE
972	YESphlox-LiCl6	0.995066	-0.00713647	1.00008	0.000118048	0.99647	-0.00510113	1.00211	0.0030472	33	0.476275	0.608715	0.215586	0.0389426	FALSE
972	YESphlox-MMS0.005	0.960677	-0.057877	0.96552	-0.0506225	0.959969	-0.0589404	0.965406	-0.0507921	33	3.4681e-09	9.20974e-08	7.03575	0.0284297	FALSE
972	YESphlox-MMS0.075	0.861837	-0.214513	0.866182	-0.207259	0.86623	-0.207177	0.871137	-0.199029	66	5.49102e-27	1.31235e-24	23.8819	0.0634996	TRUE
972	YESphlox-NaCl150	0.999876	-0.000178851	1.00492	0.00707567	0.995093	-0.00709735	1.00073	0.00105098	33	0.970648	0.989106	0.00475736	0.0180534	FALSE
972	YESphlox-NaCl150MMS0.005	0.972818	-0.0397582	0.977722	-0.0325037	0.972314	-0.0405053	0.977821	-0.032357	33	2.54159e-05	0.000337467	3.47177	0.0316448	FALSE
972	YESphlox-Ovana0.5	1.01433	0.0205279	1.01944	0.0277824	1.00889	0.0127619	1.0146	0.0209102	33	0.000382495	0.00537743	2.26943	0.0201743	FALSE
972	YESphlox-Ovana1	1.0221	0.0315353	1.02725	0.0387898	1.0131	0.0187822	1.01884	0.0269305	33	1.80118e-05	0.000253225	3.59649	0.0249964	FALSE
972	YESphlox-Ovana4	1.04935	0.069497	1.05464	0.0767516	1.02668	0.0379898	1.0325	0.0461381	28	0.0373209	0.308243	0.511107	0.119695	FALSE
972	YESphlox-Phloxine2	0.991448	-0.0123908	0.996446	-0.00513629	0.99439	-0.00811644	1.00002	3.18962e-05	33	0.128842	0.405749	0.391742	0.0309852	FALSE
972	YESphlox-Phloxine2HP10	0.975733	-0.0354419	0.980652	-0.0281874	0.972772	-0.0398261	0.978282	-0.0316778	33	0.0178387	0.177643	0.750451	0.0557603	FALSE
972	YESphlox-Phloxine2HP15	1.00574	0.00826373	1.01081	0.0155182	1.00436	0.00627998	1.01005	0.0144283	33	0.78894	0.827915	0.0820144	0.122674	FALSE
972	YESphlox-SDS0.004	1.00675	0.00970696	1.01183	0.0169615	1.00394	0.00567392	1.00963	0.0138222	33	0.0819615	0.447274	0.349426	0.0207113	FALSE
972	YESphlox-TBH1	0.95296	-0.0695122	0.957764	-0.0622577	0.95335	-0.0689228	0.958749	-0.0607744	33	3.72661e-12	1.78132e-10	9.74926	0.0259564	FALSE
972	YESphlox-TBH1.5	0.776125	-0.365639	0.780038	-0.358384	0.795054	-0.330876	0.799557	-0.322727	22	8.07426e-10	6.35175e-08	7.19711	0.100657	TRUE
972	YESphlox-TSA1000	1.00888	0.0127479	1.01396	0.0200024	1.01068	0.0153298	1.01641	0.0234781	33	0.0372621	0.171263	0.766338	0.0227113	FALSE
972	YESphlox-TSA500	1.0109	0.0156348	1.01599	0.0228893	1.01258	0.0180305	1.01831	0.0261789	33	0.0133468	0.11765	0.929409	0.0232241	FALSE
972	YESphlox-TeaTree1	0.983962	-0.0233251	0.988923	-0.0160706	0.983029	-0.0246941	0.988597	-0.0165458	32	0.00152436	0.0191897	1.71693	0.0256543	FALSE
972	YESphlox-TeaTree10	0.986051	-0.0202657	0.991022	-0.0130112	0.988731	-0.0163493	0.994332	-0.00820101	33	0.0143299	0.118099	0.927756	0.0304891	FALSE
972	YESphlox-TeaTree100	1.0029	0.00418485	1.00796	0.0114394	1.00414	0.00595327	1.00982	0.0141016	33	0.330448	0.810003	0.0915132	0.0155813	FALSE
972	YESphlox-Temp25	1.01116	0.016015	1.01626	0.0232695	1.01117	0.0160228	1.0169	0.0241712	33	0.0143204	0.190144	0.720918	0.0241155	FALSE
972	YESphlox-Temp25Gluc0.1	0.997071	-0.00423147	1.0021	0.00302305	0.994368	-0.00814833	1	0	66	0.427989	0.565134	0.247848	0.0283763	FALSE
972	YESphlox-Temp25Gluc0.5	1.00178	0.00256107	1.00683	0.00981559	0.997688	-0.00333974	1.00334	0.00480859	66	0.660174	0.781097	0.107295	0.031378	FALSE
972	YESphlox-Temp25Gluc1	1.0019	0.00274194	1.00695	0.00999646	0.997476	-0.00364623	1.00313	0.0045021	66	0.517292	0.650698	0.18662	0.0217992	FALSE
972	YESphlox-Temp25Gluc3	1.00349	0.00502978	1.00855	0.0122843	1.00232	0.00333802	1.00799	0.0114864	33	0.392424	0.880614	0.0552144	0.0222602	FALSE
972	YESphlox-Tuni20	1.03708	0.0525317	1.04231	0.0597862	1.0304	0.043205	1.03624	0.0513533	18	0.0824902	0.406104	0.391363	0.0855768	FALSE
972	YESphlox-Tuni40	1.02935	0.0417333	1.03454	0.0489878	1.02131	0.0304151	1.02709	0.0385635	30	0.0757127	0.548913	0.260497	0.0874968	FALSE
972	YESphlox-Tuni60	1.00125	0.00179745	1.00629	0.00905197	1.02247	0.0320645	1.02827	0.0402128	18	0.960147	0.960147	0.0176621	0.10471	FALSE
972	YESphlox-Tuni80	1.029	0.0412408	1.03419	0.0484953	1.03084	0.0438148	1.03667	0.0519632	29	0.0197323	0.170605	0.768009	0.0632111	FALSE
972	YESphlox-VPA10	0.981352	-0.0271568	0.9863	-0.0199023	0.983032	-0.0246901	0.9886	-0.0165417	29	0.00395289	0.0327526	1.48475	0.0317014	FALSE
972	YESphlox-VPA8	0.974197	-0.0377143	0.979108	-0.0304598	0.977154	-0.0333421	0.982689	-0.0251938	32	0.0003432	0.0068068	2.16706	0.036132	FALSE
972	YESphlox-Xylose2	0.991379	-0.012492	0.996376	-0.00523744	0.991517	-0.0122907	0.997133	-0.00414232	22	0.18813	0.47833	0.320272	0.0294069	FALSE
972	Yesphlox-Caffeine10	1.009	0.0129252	1.01409	0.0201797	1.00564	0.00811056	1.01133	0.0162589	44	0.688465	0.968011	0.0141196	0.14842	FALSE
972	Yesphlox-DMSO	1.01156	0.0165821	1.01666	0.0238366	0.998086	-0.00276451	1.00374	0.00538383	44	0.149534	0.498649	0.302205	0.0519508	FALSE
972	Yesphlox-Gal2	1.01949	0.0278459	1.02463	0.0351004	1.00464	0.00668253	1.01033	0.0148309	44	0.104896	0.481627	0.317289	0.0780593	FALSE
972	Yesphlox-Rapa1	1.01109	0.0159178	1.01619	0.0231723	0.999824	-0.00025384	1.00549	0.00789449	44	0.330937	0.757118	0.120836	0.0748091	FALSE
972	Yesphlox-Rapa100	1.00919	0.0132007	1.01428	0.0204553	1.01354	0.0194051	1.01928	0.0275534	33	0.480198	0.789726	0.102523	0.0739854	FALSE
972	Yesphlox-Sorb1.2	1.03504	0.0496868	1.04026	0.0569413	1.04037	0.0570937	1.04626	0.0652421	33	0.0007038	0.042052	1.37621	0.0536937	FALSE
972	Yesphlox-Torin5	1.02147	0.0306398	1.02661	0.0378943	1.0106	0.015213	1.01632	0.0233614	44	0.0931957	0.426743	0.369833	0.0829993	FALSE
SPAC105.02c	EMM-3AT4	1.01955	0.0279345	1.02843	0.0404401	1.00694	0.00997572	1.02843	0.0404401	2	0.0946102	0.34117	0.467029	0.00705077	FALSE
SPAC105.02c	EMM-3AT6	1.05127	0.0721266	1.06042	0.0846322	1.03115	0.0442546	1.05316	0.074719	3	0.0644992	0.261857	0.581935	0.0289416	FALSE
SPAC105.02c	EMM-Bleo200	1.19977	0.262755	1.21021	0.275261	1.18007	0.238872	1.20525	0.269336	3	0.00362271	0.0309225	1.50973	0.0360922	TRUE
SPAC105.02c	EMM-Canav60	0.854041	-0.227623	0.861476	-0.215117	0.848499	-0.237014	0.866607	-0.20655	3	0.0130446	0.114986	0.939356	0.0401228	FALSE
SPAC105.02c	EMM-Cys	1.01818	0.0259915	1.02704	0.0384971	0.997049	-0.0042637	1.01833	0.0262006	6	0.309829	0.688148	0.162318	0.0349555	FALSE
SPAC105.02c	EMM-Met	1.01796	0.025684	1.02682	0.0381895	0.998588	-0.00203819	1.0199	0.0284262	6	0.52196	0.974361	0.0112802	0.061381	FALSE
SPAC105.02c	EMMphlox-Act0.1	0.954499	-0.0671849	0.963991	-0.0529085	0.952136	-0.0707598	0.952507	-0.0701991	4	0.123876	0.507086	0.294918	0.041263	FALSE
SPAC105.02c	EMMphlox-Act1	0.961763	-0.0562473	0.971327	-0.0419709	0.960198	-0.0585958	0.960572	-0.0580351	4	0.222295	0.699059	0.155486	0.0466526	FALSE
SPAC105.02c	EMMphlox-Act2	0.95641	-0.0642982	0.965922	-0.0500219	0.960197	-0.0585978	0.96057	-0.0580371	4	0.0308246	0.566698	0.246648	0.0150323	FALSE
SPAC105.02c	EMMphlox-Cana75	1.03911	0.0553534	1.04945	0.0696298	1.04715	0.0664677	1.04756	0.0670284	6	0.0994145	0.273104	0.563672	0.0373408	FALSE
SPAC105.02c	EMMphlox-EtOH0.1	0.963771	-0.0532376	0.973356	-0.0389613	0.969735	-0.0443378	0.970112	-0.0437771	4	0.255381	0.607774	0.216258	0.0481871	FALSE
SPAC105.02c	YES-Bleo200	1.09585	0.132046	1.12021	0.163768	1.11014	0.150745	1.13837	0.18697	3	0.218851	0.443687	0.352923	0.0961059	FALSE
SPAC105.02c	YES-Bleo300	1.08875	0.122673	1.11295	0.154395	1.08536	0.11817	1.11295	0.154395	1					FALSE
SPAC105.02c	YES-Bleo600	1.12517	0.170148	1.15019	0.20187	1.12167	0.165645	1.15019	0.20187	2	0.120254	0.357717	0.446461	0.0370745	FALSE
SPAC105.02c	YES-Bortezomib100	1.05378	0.0755682	1.0772	0.10729	1.05902	0.0827241	1.08594	0.118949	3	0.0229009	0.0656676	1.18265	0.018856	FALSE
SPAC105.02c	YES-Bortezomib200	1.01209	0.0173378	1.03459	0.0490599	1.01106	0.0158653	1.03677	0.0520904	3	0.0398508	0.0933758	1.02977	0.00551769	FALSE
SPAC105.02c	YES-Bref60	0.934618	-0.0975516	0.955396	-0.0658295	0.968389	-0.0463416	0.993012	-0.0101165	3	0.476526	0.587286	0.23115	0.133197	FALSE
SPAC105.02c	YES-Calco10KCl0.5	0.959137	-0.0601912	0.98046	-0.0284691	0.943174	-0.0844045	0.967156	-0.0481794	3	0.0983665	0.207179	0.683654	0.0260982	FALSE
SPAC105.02c	YES-Calco2	1.01795	0.0256692	1.04058	0.0573913	1.01598	0.0228682	1.04181	0.0590934	3	0.0403875	0.331456	0.479574	0.00919914	FALSE
SPAC105.02c	YES-Calco4KCl0.5	0.973062	-0.0393965	0.994695	-0.00767444	0.96335	-0.0538681	0.987845	-0.017643	3	0.168464	0.460278	0.33698	0.0234121	FALSE
SPAC105.02c	YES-Cana120	0.99371	-0.00910267	1.0158	0.0226194	0.988497	-0.0166918	1.01363	0.0195334	3	0.712908	0.878274	0.0563701	0.0257245	FALSE
SPAC105.02c	YES-Cana60	1.02025	0.0289179	1.04293	0.06064	1.01661	0.0237665	1.04246	0.0599917	3	0.103802	0.400142	0.397786	0.0141812	FALSE
SPAC105.02c	YES-CoCl0.25	0.98565	-0.0208526	1.00756	0.0108695	0.999415	-0.000844305	1.02483	0.0353808	3	0.575358	0.813445	0.0896721	0.0380398	FALSE
SPAC105.02c	YES-CoCl5	1.01503	0.021526	1.0376	0.0532481	1.01971	0.028155	1.04564	0.0643802	3	0.268207	0.471334	0.326671	0.0177564	FALSE
SPAC105.02c	YES-Cycloh100	1.02672	0.0380394	1.04954	0.0697615	1.02484	0.0354017	1.0509	0.0716269	3	0.0491963	0.37588	0.424951	0.013817	FALSE
SPAC105.02c	YES-Cycloh200	1.03918	0.0554428	1.06228	0.0871649	1.04233	0.0598077	1.06883	0.0960328	3	0.087723	0.635328	0.197002	0.023818	FALSE
SPAC105.02c	YES-Cycloh400	0.995456	-0.00657001	1.01759	0.0251521	0.982372	-0.0256592	1.00735	0.0105659	3	0.764316	0.908813	0.0415254	0.0227918	FALSE
SPAC105.02c	YES-Cycloh600	0.976043	-0.0349834	0.997742	-0.00326137	0.978781	-0.0309424	1.00367	0.00528272	3	0.414689	0.744304	0.12825	0.0414908	FALSE
SPAC105.02c	YES-Dhcumarin100	1.00645	0.00927064	1.02882	0.0409927	1.00602	0.00866033	1.0316	0.0448855	3	0.414829	0.74064	0.130393	0.0102224	FALSE
SPAC105.02c	YES-Dhcumarin200	1.02907	0.0413364	1.05194	0.0730584	1.02586	0.0368333	1.05194	0.0730584	2	0.401376	0.750763	0.124497	0.0313341	FALSE
SPAC105.02c	YES-Dhcumarin50	0.994076	-0.00857262	1.01618	0.0231495	0.995672	-0.00625684	1.02099	0.0299683	3	0.560153	0.825781	0.0831354	0.0142884	FALSE
SPAC105.02c	YES-EDTA0.1	0.992123	-0.0114092	1.01418	0.0203129	0.982125	-0.0260215	1.0071	0.0102037	3	0.761975	0.868967	0.0609966	0.0398758	FALSE
SPAC105.02c	YES-EDTA0.3	0.991224	-0.0127174	1.01326	0.0190047	0.990433	-0.0138681	1.01562	0.022357	3	0.341565	0.601794	0.220552	0.0121222	FALSE
SPAC105.02c	YES-EDTA0.6	0.98023	-0.0288072	1.00202	0.00291492	0.964072	-0.0527876	0.988585	-0.0165624	3	0.525561	0.657639	0.182012	0.0457498	FALSE
SPAC105.02c	YES-EtOH5	1.09793	0.134782	1.12234	0.166504	1.09595	0.132182	1.12382	0.168407	3	0.000160104	0.00166369	2.77893	0.0113337	TRUE
SPAC105.02c	YES-Forma2	1.12019	0.163738	1.14509	0.19546	1.10917	0.14948	1.13737	0.185706	3	0.000602764	0.00335025	2.47492	0.0144132	TRUE
SPAC105.02c	YES-Forma3	1.0915	0.126317	1.11577	0.158039	1.10084	0.138607	1.12883	0.174832	3	0.142044	0.283474	0.547487	0.0691003	FALSE
SPAC105.02c	YES-HU30	1.00482	0.00694211	1.02716	0.0386642	0.988868	-0.0161506	1.01401	0.0200745	3	0.858773	0.932241	0.030472	0.0419558	FALSE
SPAC105.02c	YES-HU45	1.03214	0.0456373	1.05509	0.0773594	1.01711	0.0244745	1.04297	0.0606997	3	0.128014	0.321365	0.493001	0.0238415	FALSE
SPAC105.02c	YES-KCl0.5SDS0.01	0.872357	-0.19701	0.891751	-0.165288	0.865195	-0.208903	0.887194	-0.172678	3	0.0117723	0.0700449	1.15462	0.0291738	FALSE
SPAC105.02c	YES-KCl1SDS0.01	0.873584	-0.194981	0.893006	-0.163259	0.861964	-0.214301	0.883881	-0.178075	3	0.0101181	0.0617466	1.20939	0.0274979	FALSE
SPAC105.02c	YES-Ovana6	1.20918	0.274031	1.23606	0.305753	1.20541	0.269528	1.23606	0.305753	2	0.306109	0.686682	0.163244	0.157998	FALSE
SPAC105.02c	YES-SDS0.01	0.976192	-0.0347635	0.997894	-0.00304146	0.967136	-0.0482096	0.991727	-0.0119844	4	0.0832867	0.645204	0.190303	0.0197883	FALSE
SPAC105.02c	YES-SDS0.02	1.068	0.0949178	1.09175	0.12664	1.05605	0.0786793	1.0829	0.114904	3	0.0234538	0.10068	0.997058	0.0226881	FALSE
SPAC105.02c	YES-TBH15	0.48184	-1.05337	0.492552	-1.02165	0.480338	-1.05788	0.492552	-1.02165	1					FALSE
SPAC105.02c	YES-UV1000	0.968559	-0.0460883	0.990091	-0.0143663	0.973452	-0.0388176	0.998205	-0.00259244	3	0.195359	0.908841	0.0415119	0.0296729	FALSE
SPAC105.02c	YES-UV10m	1.01283	0.0183879	1.03534	0.05011	0.995205	-0.00693395	1.02051	0.0292912	3	0.585448	0.762369	0.117835	0.0349529	FALSE
SPAC105.02c	YES-UV2000	1.04919	0.0692723	1.07251	0.100994	1.01465	0.0209838	1.04045	0.0572089	3	0.438048	0.786899	0.104081	0.0906109	FALSE
SPAC105.02c	YES-UV20m	1.01091	0.0156537	1.03338	0.0473758	1.00382	0.00549398	1.02934	0.0417191	3	0.125073	0.243027	0.614345	0.00800246	FALSE
SPAC105.02c	YES-UV3000	1.01378	0.0197494	1.03632	0.0514715	1.00953	0.0136795	1.0352	0.0499047	3	0.027836	0.33474	0.475293	0.00601605	FALSE
SPAC105.02c	YES-UV4000	1.00007	9.60219e-05	1.0223	0.0318181	0.979396	-0.0300356	1.0043	0.00618958	3	0.99849	0.99849	0.000656202	0.0548951	FALSE
SPAC105.02c	YES-UV5m	1.05554	0.077975	1.079	0.109697	1.01798	0.0257089	1.04386	0.061934	3	0.246746	0.728787	0.137399	0.0609411	FALSE
SPAC105.02c	YES-UV6000	0.989533	-0.015181	1.01153	0.0165411	0.982724	-0.0251417	1.00771	0.0110834	3	0.114841	0.60388	0.219049	0.00721748	FALSE
SPAC105.02c	YES-UV9000	1.00326	0.00469013	1.02556	0.0364122	0.993911	-0.00881172	1.01918	0.0274134	3	0.84795	0.943048	0.0254664	0.0258827	FALSE
SPAC105.02c	YES-VPA5	0.95537	-0.065869	0.976609	-0.0341469	0.962315	-0.0554187	0.986784	-0.0191935	3	0.0604764	0.133545	0.874374	0.0227715	FALSE
SPAC105.02c	YESphlox-Act0.1	1.01726	0.0246884	1.04981	0.0701228	1.01692	0.024205	1.04286	0.0605523	4	0.286042	0.612316	0.213025	0.0273175	FALSE
SPAC105.02c	YESphlox-Act1	1.01389	0.0199	1.04633	0.0653344	1.01851	0.0264663	1.0445	0.0628136	4	0.649191	0.881572	0.0547421	0.0566658	FALSE
SPAC105.02c	YESphlox-Act2	0.997802	-0.00317507	1.02973	0.0422594	0.987246	-0.0185188	1.01243	0.0178286	3	0.971392	0.998377	0.000705372	0.0969847	FALSE
SPAC105.02c	YESphlox-Aged7	0.985048	-0.0217343	1.01656	0.0237001	0.990015	-0.0144778	1.01527	0.0218695	6	0.0134387	0.13132	0.88167	0.0102308	FALSE
SPAC105.02c	YESphlox-Benza12	0.993902	-0.00882475	1.0257	0.0366097	0.998227	-0.0025601	1.0237	0.0337872	3	0.172449	0.364024	0.438871	0.00454211	FALSE
SPAC105.02c	YESphlox-Benza4	1.00053	0.000759811	1.03254	0.0461943	1.02124	0.0303223	1.0473	0.0666696	3	0.974411	0.997494	0.00108988	0.0256137	FALSE
SPAC105.02c	YESphlox-Benza8	0.988075	-0.017307	1.01969	0.0281275	0.986905	-0.0190172	1.01208	0.0173301	3	0.302487	0.530524	0.275295	0.0155732	FALSE
SPAC105.02c	YESphlox-Bort500	1.08121	0.112641	1.1158	0.158075	1.09556	0.131666	1.12351	0.168013	3	0.0145701	0.0563815	1.24886	0.0211177	FALSE
SPAC105.02c	YESphlox-CdCl1	1.39105	0.47617	1.43555	0.521604	1.39984	0.485257	1.43555	0.521604	1					FALSE
SPAC105.02c	YESphlox-Diamide2	0.995754	-0.00613859	1.02761	0.0392959	0.998505	-0.00215779	1.02398	0.0341895	3	0.756915	0.875031	0.0579767	0.0209777	FALSE
SPAC105.02c	YESphlox-Diamide3	0.749778	-0.415464	0.773766	-0.37003	0.754516	-0.406377	0.773766	-0.37003	2	0.289489	0.706209	0.151067	0.178685	FALSE
SPAC105.02c	YESphlox-Diamide3.5	0.894857	-0.160272	0.923487	-0.114837	0.93436	-0.0979495	0.958199	-0.0616022	3	0.127632	0.210948	0.675824	0.0748	FALSE
SPAC105.02c	YESphlox-EDTA4	1.14976	0.20133	1.18654	0.246764	1.17139	0.228218	1.20127	0.264566	3	0.0614789	0.334239	0.475943	0.0702629	FALSE
SPAC105.02c	YESphlox-EGTA1	0.969965	-0.0439959	1.001	0.00143853	0.979277	-0.0302107	1.00426	0.00613666	3	0.000930516	0.0131734	1.8803	0.0068332	FALSE
SPAC105.02c	YESphlox-EGTA10	0.742583	-0.429376	0.766341	-0.383942	0.694639	-0.525664	0.712362	-0.489317	3	0.0999359	0.314681	0.50213	0.157719	FALSE
SPAC105.02c	YESphlox-EGTA15	1.1441	0.194215	1.18071	0.239649	1.15133	0.203302	1.18071	0.239649	1					FALSE
SPAC105.02c	YESphlox-EGTA5	0.992539	-0.0108044	1.02429	0.0346301	0.994274	-0.00828471	1.01964	0.0280626	3	0.383837	0.669614	0.174175	0.0117679	FALSE
SPAC105.02c	YESphlox-EtOH0.1	1.00284	0.00409448	1.03493	0.0495289	1.02681	0.0381762	1.05301	0.0745235	4	0.915685	0.943313	0.0253442	0.0506652	FALSE
SPAC105.02c	YESphlox-EtOH10	1.05119	0.072028	1.08483	0.117462	1.0652	0.0911291	1.09238	0.127476	4	0.211382	0.597615	0.223578	0.0667197	FALSE
SPAC105.02c	YESphlox-Forma2.5	1.03325	0.0471832	1.0663	0.0926176	1.04224	0.0596821	1.06883	0.0960294	3	5.91829e-06	9.42981e-05	4.0255	0.00485816	FALSE
SPAC105.02c	YESphlox-Gluc0.1Aged7	1.01148	0.0164668	1.04384	0.0619013	1.00789	0.0113401	1.03361	0.0476874	5	0.350359	0.529973	0.275747	0.0244265	FALSE
SPAC105.02c	YESphlox-Gluc0.5Aged7	1.02612	0.0371927	1.05894	0.0826272	1.03134	0.0445262	1.05766	0.0808735	12	0.00229771	0.00624038	2.20479	0.0232288	FALSE
SPAC105.02c	YESphlox-Gluc1Aged7	0.974981	-0.0365545	1.00617	0.00887989	0.990871	-0.0132314	1.01615	0.0231159	6	0.0429886	0.118399	0.926652	0.023604	FALSE
SPAC105.02c	YESphlox-Glycerol2	0.980234	-0.0288022	1.0116	0.0166323	0.984017	-0.0232443	1.00912	0.013103	3	0.252566	0.775001	0.110698	0.0224858	FALSE
SPAC105.02c	YESphlox-Glycerol2MMS0.0075	0.928744	-0.106646	0.958459	-0.061212	0.950821	-0.072755	0.97508	-0.0364077	3	0.0461473	0.0914117	1.039	0.0299679	FALSE
SPAC105.02c	YESphlox-Glycerol3	0.997886	-0.00305251	1.02981	0.0423819	1.00105	0.00151597	1.02659	0.0378633	3	0.81536	0.945976	0.0241199	0.0134778	FALSE
SPAC105.02c	YESphlox-Glycerol3MMS0.005	0.997308	-0.00388964	1.02922	0.0415448	1.00763	0.010966	1.03334	0.0473133	3	0.642059	0.697509	0.15645	0.00765108	FALSE
SPAC105.02c	YESphlox-HP10	0.983118	-0.0245641	1.01457	0.0208703	1.00957	0.0137338	1.03532	0.0500811	5	0.660756	0.822504	0.0848622	0.0820726	FALSE
SPAC105.02c	YESphlox-HP15	1.03979	0.0562925	1.07306	0.101727	1.01295	0.0185696	1.0388	0.0549169	3	0.401168	0.567333	0.246162	0.0672536	FALSE
SPAC105.02c	YESphlox-HP2	0.975171	-0.0362731	1.00637	0.00916138	0.984829	-0.0220541	1.00996	0.0142932	6	0.291657	0.659426	0.180834	0.052885	FALSE
SPAC105.02c	YESphlox-HP4	0.973346	-0.0389757	1.00449	0.00645874	0.972351	-0.0404506	0.99716	-0.00410324	9	0.024252	0.152533	0.816638	0.0293822	FALSE
SPAC105.02c	YESphlox-HP6	0.960723	-0.0578077	0.99146	-0.0123732	0.972805	-0.0397774	0.997625	-0.00343014	8	0.0688565	0.249344	0.603201	0.0530953	FALSE
SPAC105.02c	YESphlox-HP8	0.951565	-0.0716258	0.982009	-0.0261914	0.947375	-0.0779928	0.971546	-0.0416455	8	0.00581622	0.0695038	1.15799	0.0367048	FALSE
SPAC105.02c	YESphlox-HU8	0.978095	-0.0319536	1.00939	0.0134808	0.992486	-0.0108821	1.01781	0.0254652	3	0.4838	0.581047	0.235789	0.0458583	FALSE
SPAC105.02c	YESphlox-HU8MMS0.075	1.01274	0.0182702	1.04515	0.0637046	1.02932	0.0416966	1.05559	0.0780439	3	0.73134	0.865298	0.0628344	0.0576046	FALSE
SPAC105.02c	YESphlox-KCl0.5	0.954861	-0.0666372	0.985411	-0.0212028	0.963362	-0.0538496	0.987942	-0.0175023	3	8.18683e-05	0.00130443	2.88458	0.00676376	FALSE
SPAC105.02c	YESphlox-KCl0.5SDS0.004	0.895913	-0.158569	0.924577	-0.113135	0.903281	-0.146753	0.926327	-0.110406	3	1.76689e-08	1.03363e-06	5.98563	0.00592248	TRUE
SPAC105.02c	YESphlox-KCl1	0.946813	-0.0788487	0.977105	-0.0334142	0.960958	-0.0574554	0.985476	-0.021108	3	0.180749	0.561491	0.250657	0.0473816	FALSE
SPAC105.02c	YESphlox-LiCl4	0.999445	-0.000800963	1.03142	0.0446335	1.00146	0.00210154	1.02701	0.0384489	3	0.951504	0.971835	0.0124074	0.0136811	FALSE
SPAC105.02c	YESphlox-LiCl6	0.949946	-0.074082	0.980339	-0.0286475	0.952559	-0.0701195	0.976863	-0.0337722	3	0.000158909	0.00474741	2.32354	0.00748007	FALSE
SPAC105.02c	YESphlox-MMS0.005	0.971537	-0.0416591	1.00262	0.00377533	0.983865	-0.0234676	1.00897	0.0128797	3	0.134521	0.251382	0.599667	0.0216913	FALSE
SPAC105.02c	YESphlox-MMS0.075	0.94055	-0.0884231	0.970642	-0.0429887	0.936225	-0.0950732	0.960112	-0.0587259	6	0.00434706	0.00911357	2.04031	0.0319124	TRUE
SPAC105.02c	YESphlox-NaCl150	0.961743	-0.0562772	0.992513	-0.0108427	0.972414	-0.0403568	0.997225	-0.00400952	3	0.020138	0.114521	0.941115	0.0133821	FALSE
SPAC105.02c	YESphlox-NaCl150MMS0.005	0.973416	-0.0388717	1.00456	0.00656276	0.975036	-0.036472	0.999914	-0.000124728	3	0.0313625	0.104106	0.982524	0.0115574	FALSE
SPAC105.02c	YESphlox-Ovana0.5	1.01747	0.0249863	1.05002	0.0704207	1.03636	0.0515244	1.0628	0.0878717	3	0.505712	0.646338	0.18954	0.0387214	FALSE
SPAC105.02c	YESphlox-Ovana1	1.00947	0.0135936	1.04176	0.0590281	1.02843	0.0404459	1.05467	0.0767932	3	0.736762	0.800392	0.0966973	0.0436541	FALSE
SPAC105.02c	YESphlox-Ovana4	0.905396	-0.14338	0.934363	-0.0979453	0.92515	-0.11224	0.948755	-0.0758928	3	0.0300222	0.29795	0.525857	0.0318988	FALSE
SPAC105.02c	YESphlox-Phloxine2	0.978484	-0.0313791	1.00979	0.0140553	0.984846	-0.0220297	1.00997	0.0143176	3	0.0064879	0.086145	1.06477	0.00709208	FALSE
SPAC105.02c	YESphlox-Phloxine2HP10	1.01405	0.0201262	1.04649	0.0655606	0.927408	-0.108725	0.951069	-0.0723774	3	0.900623	0.912072	0.0399711	0.177732	FALSE
SPAC105.02c	YESphlox-Phloxine2HP15	1.03158	0.0448579	1.06459	0.0902923	0.976027	-0.0350071	1.00093	0.00134025	3	0.686691	0.75499	0.122059	0.120924	FALSE
SPAC105.02c	YESphlox-SDS0.004	0.97032	-0.0434671	1.00136	0.00196734	0.98228	-0.0257934	1.00734	0.0105539	3	0.0806109	0.447274	0.349426	0.0176035	FALSE
SPAC105.02c	YESphlox-TBH1	0.82531	-0.276992	0.851715	-0.231558	0.811021	-0.302189	0.831713	-0.265842	3	0.0238549	0.0891221	1.05001	0.0505441	FALSE
SPAC105.02c	YESphlox-TBH1.5	0.445579	-1.16625	0.459834	-1.12081	0.448394	-1.15716	0.459834	-1.12081	2	0.0476263	0.244343	0.611999	0.0623048	FALSE
SPAC105.02c	YESphlox-TSA1000	1.04381	0.0618645	1.07721	0.107299	1.04748	0.0669277	1.07421	0.103275	3	0.0351216	0.167881	0.774998	0.0176602	FALSE
SPAC105.02c	YESphlox-TSA500	1.03566	0.0505443	1.06879	0.0959787	1.04332	0.061187	1.06994	0.0975343	3	0.0742124	0.31234	0.505372	0.0199629	FALSE
SPAC105.02c	YESphlox-TeaTree1	0.959841	-0.0591334	0.99055	-0.0136989	0.960834	-0.0576405	0.985349	-0.0212931	3	0.168003	0.389444	0.409554	0.0343247	FALSE
SPAC105.02c	YESphlox-TeaTree10	0.986865	-0.0190757	1.01844	0.0263587	0.993745	-0.00905253	1.0191	0.0272948	3	0.095014	0.327587	0.484673	0.00906388	FALSE
SPAC105.02c	YESphlox-TeaTree100	0.975715	-0.0354676	1.00693	0.00996682	0.979441	-0.0299698	1.00443	0.00637753	3	0.411984	0.845035	0.0731254	0.0421943	FALSE
SPAC105.02c	YESphlox-Temp25	1.02184	0.0311628	1.05453	0.0765973	1.00528	0.00760107	1.03093	0.0439484	3	0.475778	0.80646	0.0934172	0.0447574	FALSE
SPAC105.02c	YESphlox-Temp25Gluc0.1	1.01642	0.0234907	1.04893	0.0689251	1.01338	0.0191712	1.03923	0.0555186	6	0.370599	0.521018	0.283147	0.0416527	FALSE
SPAC105.02c	YESphlox-Temp25Gluc0.5	1.0025	0.00360227	1.03457	0.0490367	1.01784	0.0255131	1.04381	0.0618605	6	0.881622	0.941261	0.0262899	0.0395935	FALSE
SPAC105.02c	YESphlox-Temp25Gluc1	0.97236	-0.0404382	1.00347	0.00499628	0.978522	-0.0313239	1.00349	0.00502343	6	0.142378	0.298677	0.524799	0.0398853	FALSE
SPAC105.02c	YESphlox-Temp25Gluc3	0.999228	-0.00111449	1.0312	0.04432	1.01311	0.0187886	1.03896	0.0551359	3	0.941032	0.995971	0.00175317	0.0158688	FALSE
SPAC105.02c	YESphlox-Tuni20	1.01994	0.0284775	1.05257	0.0739119	1.02638	0.0375646	1.05257	0.0739119	2	0.794331	0.916617	0.0378122	0.0868889	FALSE
SPAC105.02c	YESphlox-Tuni40	1.08347	0.115661	1.11814	0.161096	1.10917	0.149477	1.13747	0.185824	3	0.130857	0.591608	0.227966	0.0604263	FALSE
SPAC105.02c	YESphlox-Tuni60									0					FALSE
SPAC105.02c	YESphlox-Tuni80	1.10187	0.139954	1.13712	0.185389	1.10883	0.149041	1.13712	0.185389	2	0.399265	0.704394	0.152184	0.107892	FALSE
SPAC105.02c	YESphlox-VPA10	0.97052	-0.0431698	1.00157	0.00226467	0.974595	-0.0371252	0.999461	-0.000777907	3	0.00204102	0.0225485	1.64688	0.00741978	FALSE
SPAC105.02c	YESphlox-VPA8	0.984288	-0.0228482	1.01578	0.0225862	0.998889	-0.00160399	1.02437	0.0347433	3	0.239014	0.415221	0.381721	0.0172712	FALSE
SPAC105.02c	YESphlox-Xylose2	1.002	0.00288811	1.03406	0.0483226	1.00834	0.0119752	1.03406	0.0483226	2	0.903904	0.955899	0.0195882	0.01908	FALSE
SPAC105.02c	Yesphlox-Caffeine10	0.994895	-0.00738395	1.02673	0.0380505	0.997694	-0.00333115	1.02315	0.0330162	4	0.857495	0.996233	0.00163927	0.0535911	FALSE
SPAC105.02c	Yesphlox-DMSO	0.988882	-0.0161297	1.02052	0.0293048	1.00115	0.00165856	1.02669	0.0380059	4	0.66992	0.874923	0.0580303	0.0484369	FALSE
SPAC105.02c	Yesphlox-Gal2	0.967706	-0.0473588	0.998667	-0.00192435	0.968509	-0.0461632	0.993219	-0.00981587	4	0.0261535	0.458653	0.338516	0.0179668	FALSE
SPAC105.02c	Yesphlox-Rapa1	0.987587	-0.0180209	1.01918	0.0274136	1.0076	0.0109277	1.03331	0.047275	4	0.746783	0.934547	0.0293988	0.072167	FALSE
SPAC105.02c	Yesphlox-Rapa100	0.990931	-0.0131438	1.02263	0.0322906	0.981484	-0.026963	1.00653	0.00938436	3	0.673475	0.863591	0.063692	0.0329417	FALSE
SPAC105.02c	Yesphlox-Sorb1.2	1.05429	0.0762734	1.08802	0.121708	1.05995	0.0839985	1.087	0.120346	3	0.298704	0.620351	0.207362	0.0698248	FALSE
SPAC105.02c	Yesphlox-Torin5	0.959214	-0.0600759	0.989903	-0.0146415	0.988621	-0.0165107	1.01384	0.0198366	4	0.356703	0.710433	0.148477	0.0773725	FALSE
SPAC1071.07c	EMM-3AT4	0.911127	-0.134276	0.834861	-0.260392	0.960233	-0.0585442	0.831798	-0.265696	3	0.0918722	0.34117	0.467029	0.0253374	FALSE
SPAC1071.07c	EMM-3AT6	0.912099	-0.132737	0.835752	-0.258853	0.964797	-0.051702	0.835752	-0.258853	2	0.107427	0.323658	0.489913	0.0258726	FALSE
SPAC1071.07c	EMM-Bleo200	0.909559	-0.13676	0.833424	-0.262877	0.958137	-0.061696	0.829982	-0.268847	3	0.0765449	0.207205	0.6836	0.00860746	FALSE
SPAC1071.07c	EMM-Canav60	0.889556	-0.168842	0.815096	-0.294959	0.897633	-0.155802	0.777571	-0.362953	3	0.326471	0.611812	0.213382	0.133836	FALSE
SPAC1071.07c	EMM-Cys	0.964687	-0.0518665	0.883938	-0.177983	1.07449	0.103646	0.930769	-0.103505	6	0.567873	0.838762	0.0763611	0.0879123	FALSE
SPAC1071.07c	EMM-Met	1.01568	0.0224442	0.930661	-0.103672	0.917247	-0.124618	0.794561	-0.331769	6	0.927055	0.982526	0.00765581	0.353472	FALSE
SPAC1071.07c	EMMphlox-Act0.1	0.95812	-0.0617223	0.833423	-0.26288	0.971529	-0.041671	0.853349	-0.228793	4	0.681194	0.856233	0.067408	0.154194	FALSE
SPAC1071.07c	EMMphlox-Act1	0.940009	-0.0892532	0.817669	-0.290411	1.00504	0.00725297	0.882783	-0.179869	4	0.567537	0.79789	0.0980568	0.157134	FALSE
SPAC1071.07c	EMMphlox-Act2	1.01331	0.01908	0.881433	-0.182078	1.057	0.0799811	0.928426	-0.107141	4	0.882399	0.965025	0.0154613	0.13583	FALSE
SPAC1071.07c	EMMphlox-Cana75	1.0222	0.0316823	0.889166	-0.169475	1.00702	0.01009	0.884521	-0.177032	6	0.592191	0.795133	0.0995605	0.0513906	FALSE
SPAC1071.07c	EMMphlox-EtOH0.1	0.949007	-0.0755089	0.825496	-0.276666	0.935201	-0.0966519	0.82144	-0.283773	4	0.571268	0.792862	0.100802	0.1329	FALSE
SPAC1071.07c	YES-Bleo200	0.925527	-0.111654	0.833484	-0.262773	0.910959	-0.134543	0.815919	-0.293502	3	0.278859	0.499764	0.301235	0.079308	FALSE
SPAC1071.07c	YES-Bleo300	0.946283	-0.0796571	0.852176	-0.230777	0.951439	-0.0718173	0.852176	-0.230777	1					FALSE
SPAC1071.07c	YES-Bleo600	0.907429	-0.140143	0.817186	-0.291263	0.912373	-0.132304	0.817186	-0.291263	1					FALSE
SPAC1071.07c	YES-Bortezomib100	0.887013	-0.172972	0.798801	-0.324092	0.879151	-0.185816	0.78743	-0.344776	3	0.00112156	0.00741478	2.1299	0.0197668	TRUE
SPAC1071.07c	YES-Bortezomib200	0.758278	-0.399202	0.682868	-0.550321	0.766098	-0.3844	0.686171	-0.543359	3	0.0217354	0.0641328	1.19292	0.0625481	FALSE
SPAC1071.07c	YES-Bref60	3.54166	1.82443	3.18945	1.67331	3.56096	1.83227	3.18945	1.67331	2	0.0830692	0.197445	0.704553	0.425838	FALSE
SPAC1071.07c	YES-Calco10KCl0.5	1.04124	0.0582994	0.937688	-0.0928203	0.999129	-0.00125681	0.894891	-0.160216	3	0.573049	0.678535	0.168428	0.0959814	FALSE
SPAC1071.07c	YES-Calco2	0.898736	-0.154031	0.809357	-0.305151	0.990851	-0.0132598	0.887476	-0.172219	3	0.364709	0.741886	0.129663	0.135819	FALSE
SPAC1071.07c	YES-Calco4KCl0.5	0.997196	-0.0040504	0.898026	-0.15517	1.0347	0.0492103	0.926749	-0.109749	3	0.947605	0.97632	0.0104077	0.057949	FALSE
SPAC1071.07c	YES-Cana120	0.91979	-0.120624	0.828318	-0.271744	0.987342	-0.0183777	0.884334	-0.177337	3	0.494918	0.830782	0.0805131	0.151029	FALSE
SPAC1071.07c	YES-Cana60	0.965714	-0.0503319	0.869675	-0.201452	1.00004	5.44718e-05	0.895705	-0.158905	3	0.414602	0.714823	0.145801	0.0521403	FALSE
SPAC1071.07c	YES-CoCl0.25	1.0588	0.0824352	0.953507	-0.0686846	1.09193	0.126879	0.978009	-0.0320801	3	0.516202	0.761557	0.118298	0.117109	FALSE
SPAC1071.07c	YES-CoCl5	1.09208	0.127074	0.983471	-0.0240459	1.08594	0.118942	0.972643	-0.0400174	3	0.0270323	0.134598	0.870961	0.0315299	FALSE
SPAC1071.07c	YES-Cycloh100	1.01341	0.0192211	0.91263	-0.131899	1.013	0.0186334	0.907314	-0.140326	3	0.737	0.945233	0.024461	0.0533266	FALSE
SPAC1071.07c	YES-Cycloh200	1.02513	0.0358023	0.923179	-0.115317	1.02073	0.0295982	0.914236	-0.129361	3	0.172169	0.689433	0.161508	0.0196086	FALSE
SPAC1071.07c	YES-Cycloh400	1.05843	0.0819272	0.953171	-0.0691925	1.05671	0.0795769	0.946463	-0.0793825	3	0.170904	0.675706	0.170242	0.0450531	FALSE
SPAC1071.07c	YES-Cycloh600	1.01714	0.0245191	0.915987	-0.126601	1.0195	0.0278594	0.913135	-0.1311	3	0.560035	0.814284	0.089224	0.0375783	FALSE
SPAC1071.07c	YES-Dhcumarin100	1.03181	0.0451799	0.929199	-0.10594	1.03618	0.051279	0.928079	-0.10768	3	0.0241762	0.239748	0.620246	0.0121642	FALSE
SPAC1071.07c	YES-Dhcumarin200	1.0526	0.0739566	0.94792	-0.0771631	1.0756	0.105139	0.963382	-0.0538207	3	0.252849	0.596359	0.224492	0.0522735	FALSE
SPAC1071.07c	YES-Dhcumarin50	0.994415	-0.00807956	0.895522	-0.159199	0.996078	-0.00566997	0.892158	-0.164629	3	0.764586	0.896411	0.0474926	0.0229701	FALSE
SPAC1071.07c	YES-EDTA0.1	1.07218	0.100553	0.965557	-0.0505665	1.0968	0.133298	0.98237	-0.0256617	3	0.0439174	0.177903	0.749817	0.0302917	FALSE
SPAC1071.07c	YES-EDTA0.3	1.08946	0.123619	0.981119	-0.0275005	1.08882	0.122765	0.975224	-0.0361941	3	0.0263341	0.168335	0.773826	0.0306285	FALSE
SPAC1071.07c	YES-EDTA0.6	0.936072	-0.0953086	0.842981	-0.246428	0.98767	-0.0178991	0.884627	-0.176859	3	0.330605	0.487744	0.311808	0.0784236	FALSE
SPAC1071.07c	YES-EtOH5	0.880979	-0.182821	0.793367	-0.33394	0.877796	-0.188043	0.786216	-0.347003	3	0.0301917	0.0901976	1.0448	0.0397164	FALSE
SPAC1071.07c	YES-Forma2	0.560424	-0.835409	0.504691	-0.986528	0.567486	-0.817342	0.508281	-0.976302	3	9.86223e-26	7.85691e-24	23.1047	0.00735979	TRUE
SPAC1071.07c	YES-Forma3	0.693785	-0.52744	0.624789	-0.67856	0.672676	-0.572016	0.602496	-0.730976	3	0.0238175	0.105414	0.9771	0.0798899	FALSE
SPAC1071.07c	YES-HU30	0.963137	-0.0541876	0.867354	-0.205307	0.970407	-0.0433381	0.869165	-0.202298	3	0.000607827	0.00764583	2.11658	0.00528193	FALSE
SPAC1071.07c	YES-HU45	0.982509	-0.0254569	0.8848	-0.176577	0.986554	-0.0195304	0.883627	-0.17849	3	0.247138	0.44747	0.349236	0.0158799	FALSE
SPAC1071.07c	YES-KCl0.5SDS0.01	1.05173	0.0727656	0.947138	-0.0783541	1.11744	0.160201	1.00086	0.00124121	3	0.548949	0.655782	0.18324	0.11263	FALSE
SPAC1071.07c	YES-KCl1SDS0.01	0.984664	-0.0222971	0.88674	-0.173417	1.02247	0.032052	0.915792	-0.126907	3	0.830389	0.87448	0.05825	0.0977365	FALSE
SPAC1071.07c	YES-Ovana6	0.711057	-0.491963	0.640343	-0.643083	0.714931	-0.484123	0.640343	-0.643083	2	0.346204	0.687035	0.163021	0.222982	FALSE
SPAC1071.07c	YES-SDS0.01	0.761009	-0.394014	0.685328	-0.545134	0.769644	-0.377737	0.689348	-0.536696	4	0.244755	0.822211	0.0850166	0.298298	FALSE
SPAC1071.07c	YES-SDS0.02	0.314121	-1.67061	0.282882	-1.82173	0.315832	-1.66277	0.282882	-1.82173	2	0.0342819	0.128332	0.891666	0.0571648	FALSE
SPAC1071.07c	YES-TBH15	0.431014	-1.21419	0.38815	-1.36531	0.433363	-1.20635	0.38815	-1.36531	1					FALSE
SPAC1071.07c	YES-UV1000	0.947418	-0.0779263	0.853199	-0.229046	1.16014	0.214297	1.0391	0.0553372	3	0.83153	0.968242	0.0140161	0.339166	FALSE
SPAC1071.07c	YES-UV10m	1.03855	0.0545772	0.935272	-0.0965425	1.0167	0.0239002	0.910632	-0.135059	3	0.35469	0.587176	0.231232	0.0503592	FALSE
SPAC1071.07c	YES-UV2000	0.820068	-0.286184	0.738514	-0.437304	0.840494	-0.25069	0.752806	-0.409649	3	0.406227	0.786899	0.104081	0.268918	FALSE
SPAC1071.07c	YES-UV20m	0.872112	-0.197414	0.785382	-0.348534	0.874185	-0.19399	0.782982	-0.352949	3	2.99945e-14	1.79217e-12	11.7466	0.00611376	TRUE
SPAC1071.07c	YES-UV3000	1.09057	0.125085	0.982116	-0.0260343	1.11648	0.158959	1	0	3	0.0726287	0.467179	0.330517	0.0441851	FALSE
SPAC1071.07c	YES-UV4000	1.02838	0.0403783	0.926112	-0.110741	1.04124	0.0583002	0.932607	-0.100659	3	0.204147	0.58283	0.234458	0.024652	FALSE
SPAC1071.07c	YES-UV5m	0.640644	-0.642404	0.576933	-0.793524	0.881019	-0.182755	0.789103	-0.341714	3	0.380235	0.728787	0.137399	0.501892	FALSE
SPAC1071.07c	YES-UV6000	0.955608	-0.0655089	0.860574	-0.216629	0.974687	-0.0369897	0.872998	-0.195949	3	0.196526	0.626263	0.203243	0.0375672	FALSE
SPAC1071.07c	YES-UV9000	0.995568	-0.00640759	0.89656	-0.157527	1.00054	0.000778726	0.896154	-0.158181	3	0.751257	0.880784	0.0551306	0.0152344	FALSE
SPAC1071.07c	YES-VPA5	0.813517	-0.297756	0.732614	-0.448875	0.801673	-0.318914	0.718035	-0.477873	3	0.00743999	0.0306579	1.51346	0.0364089	TRUE
SPAC1071.07c	YESphlox-Act0.1	0.838775	-0.253645	0.751123	-0.412878	0.878267	-0.187268	0.811477	-0.301378	4	0.204363	0.551428	0.258511	0.178671	FALSE
SPAC1071.07c	YESphlox-Act1	0.891941	-0.16498	0.798734	-0.324213	0.905473	-0.143257	0.836613	-0.257367	4	0.351297	0.712421	0.147263	0.175297	FALSE
SPAC1071.07c	YESphlox-Act2	0.800006	-0.321917	0.716406	-0.48115	0.870272	-0.200461	0.80409	-0.314571	3	0.343104	0.900875	0.0453353	0.251869	FALSE
SPAC1071.07c	YESphlox-Aged7	0.988353	-0.0169018	0.885071	-0.176135	0.964881	-0.0515769	0.891504	-0.165687	6	0.555294	0.809239	0.0919232	0.0312386	FALSE
SPAC1071.07c	YESphlox-Benza12	0.993046	-0.0100673	0.889274	-0.169301	0.969481	-0.0447149	0.895755	-0.158825	3	0.752868	0.856835	0.0671026	0.0254192	FALSE
SPAC1071.07c	YESphlox-Benza4	0.994663	-0.0077207	0.890721	-0.166954	0.975304	-0.0360761	0.901134	-0.150186	3	0.778228	0.941023	0.0263999	0.019912	FALSE
SPAC1071.07c	YESphlox-Benza8	0.99329	-0.0097127	0.889492	-0.168946	0.954223	-0.0676023	0.881656	-0.181712	3	0.784265	0.860161	0.0654201	0.0294122	FALSE
SPAC1071.07c	YESphlox-Bort500	0.671943	-0.573588	0.601726	-0.732822	0.665103	-0.588351	0.614523	-0.70246	3	0.000146914	0.00167202	2.77676	0.0309203	TRUE
SPAC1071.07c	YESphlox-CdCl1	0.971227	-0.0421196	0.869735	-0.201353	0.94132	-0.0872432	0.869735	-0.201353	2	0.071833	0.359165	0.444706	0.00905851	FALSE
SPAC1071.07c	YESphlox-Diamide2	0.95193	-0.0710732	0.852454	-0.230306	0.929108	-0.106082	0.858452	-0.220191	3	0.0216404	0.133078	0.875893	0.0181435	FALSE
SPAC1071.07c	YESphlox-Diamide3	0.829936	-0.268928	0.743208	-0.428161	0.80438	-0.314052	0.743208	-0.428161	2	0.24094	0.706209	0.151067	0.0893522	FALSE
SPAC1071.07c	YESphlox-Diamide3.5	0.541238	-0.885665	0.484679	-1.0449	0.500121	-0.999652	0.462088	-1.11376	3	0.00113955	0.00797683	2.09817	0.0471086	TRUE
SPAC1071.07c	YESphlox-EDTA4	0.958142	-0.0616889	0.858017	-0.220922	0.934241	-0.0981338	0.863194	-0.212243	3	0.740429	0.838685	0.0764014	0.170232	FALSE
SPAC1071.07c	YESphlox-EGTA1	1.08681	0.120096	0.973237	-0.0391375	1.04668	0.0658155	0.967079	-0.0482942	3	0.0167512	0.100088	0.999617	0.0292876	FALSE
SPAC1071.07c	YESphlox-EGTA10	1.39024	0.475335	1.24496	0.316102	1.23091	0.299724	1.1373	0.185614	3	0.140025	0.35286	0.452397	0.254968	FALSE
SPAC1071.07c	YESphlox-EGTA15	1.27311	0.348362	1.14007	0.189129	1.07713	0.107194	0.995218	-0.00691562	3	0.396411	0.833387	0.0791534	0.395667	FALSE
SPAC1071.07c	YESphlox-EGTA5	1.06747	0.0941906	0.955917	-0.0650427	1.04334	0.0612087	0.963996	-0.0529009	3	0.0509989	0.264973	0.576799	0.0317888	FALSE
SPAC1071.07c	YESphlox-EtOH0.1	0.802837	-0.316822	0.718941	-0.476055	0.770943	-0.375305	0.712314	-0.489414	4	0.0993818	0.418984	0.377803	0.150667	FALSE
SPAC1071.07c	YESphlox-EtOH10	0.819847	-0.286573	0.734174	-0.445806	0.784262	-0.350591	0.724621	-0.464701	4	0.166366	0.586314	0.231869	0.177602	FALSE
SPAC1071.07c	YESphlox-Forma2.5	0.669086	-0.579735	0.599167	-0.738969	0.572588	-0.804431	0.529044	-0.918541	3	0.0537151	0.151444	0.819748	0.128055	FALSE
SPAC1071.07c	YESphlox-Gluc0.1Aged7	0.976606	-0.0341511	0.874552	-0.193384	0.956565	-0.0640651	0.88382	-0.178175	5	0.374069	0.548481	0.260838	0.0421407	FALSE
SPAC1071.07c	YESphlox-Gluc0.5Aged7	0.96715	-0.0481892	0.866083	-0.207422	0.942682	-0.0851575	0.870993	-0.199267	12	0.090724	0.140799	0.851401	0.0422572	FALSE
SPAC1071.07c	YESphlox-Gluc1Aged7	0.998739	-0.00182077	0.894371	-0.161054	0.966372	-0.0493489	0.892882	-0.163459	6	0.96068	0.973024	0.0118764	0.046518	FALSE
SPAC1071.07c	YESphlox-Glycerol2	1.04293	0.0606447	0.933946	-0.0985886	1.01405	0.0201341	0.936937	-0.0939755	3	0.0967232	0.673835	0.171446	0.0258314	FALSE
SPAC1071.07c	YESphlox-Glycerol2MMS0.0075	0.732214	-0.449662	0.655698	-0.608896	0.712722	-0.488589	0.658521	-0.602699	3	1.60109e-08	2.72186e-07	6.56513	0.0174218	TRUE
SPAC1071.07c	YESphlox-Glycerol3	1.03337	0.0473524	0.925381	-0.111881	0.992075	-0.0114789	0.91663	-0.125589	3	0.0650748	0.352531	0.452803	0.0157279	FALSE
SPAC1071.07c	YESphlox-Glycerol3MMS0.005	0.899154	-0.15336	0.805193	-0.312593	0.893926	-0.161772	0.825945	-0.275882	3	0.0667968	0.128745	0.890268	0.0489008	FALSE
SPAC1071.07c	YESphlox-HP10	0.983268	-0.024344	0.880517	-0.183577	0.993382	-0.00957921	0.917838	-0.123689	5	0.918574	0.971412	0.0125966	0.307006	FALSE
SPAC1071.07c	YESphlox-HP15	0.877678	-0.188236	0.785961	-0.34747	0.904817	-0.144302	0.836008	-0.258411	3	0.260273	0.438543	0.357988	0.122691	FALSE
SPAC1071.07c	YESphlox-HP2	0.937296	-0.0934239	0.839349	-0.252657	0.955358	-0.0658871	0.882705	-0.179997	6	0.404055	0.727932	0.137909	0.149201	FALSE
SPAC1071.07c	YESphlox-HP4	0.924246	-0.11365	0.827664	-0.272884	0.988662	-0.0164506	0.913477	-0.13056	9	0.283583	0.534705	0.271886	0.174524	FALSE
SPAC1071.07c	YESphlox-HP6	0.869384	-0.201935	0.778534	-0.361168	1.02948	0.0419113	0.951187	-0.0721984	8	0.271511	0.506962	0.295024	0.275857	FALSE
SPAC1071.07c	YESphlox-HP8	0.731089	-0.451882	0.654691	-0.611115	0.923257	-0.115195	0.853046	-0.229305	8	0.139838	0.319655	0.495319	0.408391	FALSE
SPAC1071.07c	YESphlox-HU8	0.743953	-0.426717	0.66621	-0.585951	0.698008	-0.518684	0.644926	-0.632794	3	0.00580994	0.024361	1.61331	0.0474053	TRUE
SPAC1071.07c	YESphlox-HU8MMS0.075	1.0876	0.121155	0.973951	-0.0380786	1.04343	0.0613339	0.96408	-0.0527758	3	0.00673902	0.0699863	1.15499	0.0248461	FALSE
SPAC1071.07c	YESphlox-KCl0.5	1.07021	0.0978951	0.958375	-0.0613381	1.04486	0.0633038	0.965397	-0.0508059	3	0.121015	0.28694	0.542209	0.0455441	FALSE
SPAC1071.07c	YESphlox-KCl0.5SDS0.004	0.754029	-0.407309	0.675233	-0.566542	0.725799	-0.462358	0.670604	-0.576467	3	0.00172059	0.0154853	1.81008	0.0368265	TRUE
SPAC1071.07c	YESphlox-KCl1	1.11539	0.157546	0.998831	-0.00168705	1.13494	0.182616	1.04863	0.0685066	3	0.236298	0.61386	0.21193	0.107893	FALSE
SPAC1071.07c	YESphlox-LiCl4	1.05257	0.0739154	0.942577	-0.0853179	1.01726	0.0246899	0.939901	-0.0894198	3	0.0451667	0.239885	0.619996	0.0244384	FALSE
SPAC1071.07c	YESphlox-LiCl6	1.04937	0.0695199	0.939709	-0.0897134	1.00346	0.00498169	0.927148	-0.109128	3	0.0672834	0.239172	0.621289	0.0260626	FALSE
SPAC1071.07c	YESphlox-MMS0.005	0.809644	-0.304641	0.725037	-0.463874	0.784712	-0.349765	0.725037	-0.463874	2	0.0164435	0.0484134	1.31503	0.0259179	TRUE
SPAC1071.07c	YESphlox-MMS0.075	0.779741	-0.358933	0.698259	-0.518166	0.742853	-0.428852	0.686361	-0.542961	6	5.2824e-05	0.000293603	3.53224	0.0551108	TRUE
SPAC1071.07c	YESphlox-NaCl150	1.11769	0.160524	1.00089	0.00129033	1.10448	0.143373	1.02049	0.0292629	3	0.0272216	0.127568	0.894258	0.0412415	FALSE
SPAC1071.07c	YESphlox-NaCl150MMS0.005	0.898262	-0.154792	0.804394	-0.314025	0.846956	-0.23964	0.782547	-0.35375	3	0.0660154	0.160997	0.793183	0.0490464	FALSE
SPAC1071.07c	YESphlox-Ovana0.5	0.993314	-0.00967808	0.889514	-0.168911	0.981631	-0.026747	0.90698	-0.140857	3	0.822844	0.881882	0.0545893	0.0377096	FALSE
SPAC1071.07c	YESphlox-Ovana1	1.03079	0.0437506	0.923073	-0.115483	0.984666	-0.022293	0.909785	-0.136403	3	0.376831	0.459503	0.337712	0.0416122	FALSE
SPAC1071.07c	YESphlox-Ovana4	1.03106	0.0441351	0.923319	-0.115098	1.02349	0.0334911	0.945652	-0.0806186	3	0.68148	0.82146	0.0854137	0.100499	FALSE
SPAC1071.07c	YESphlox-Phloxine2	1.05185	0.0729282	0.941932	-0.0863051	1.01989	0.0284172	0.942332	-0.0856924	3	0.0053467	0.0799344	1.09727	0.0143926	FALSE
SPAC1071.07c	YESphlox-Phloxine2HP10	1.06557	0.091628	0.954221	-0.0676052	1.00962	0.0138157	0.932843	-0.100294	3	0.329528	0.495201	0.305218	0.0798266	FALSE
SPAC1071.07c	YESphlox-Phloxine2HP15	1.00941	0.013506	0.903924	-0.145727	1.00762	0.0109487	0.930991	-0.103161	3	0.900853	0.924051	0.0343039	0.102445	FALSE
SPAC1071.07c	YESphlox-SDS0.004	1.03806	0.0538965	0.929588	-0.105337	1.03371	0.0478268	0.955096	-0.0662829	3	0.434045	0.823307	0.0844381	0.0602014	FALSE
SPAC1071.07c	YESphlox-TBH1	1.0578	0.0810618	0.947257	-0.0781715	1.0422	0.0596337	0.962944	-0.054476	3	0.146017	0.24576	0.609488	0.0415419	FALSE
SPAC1071.07c	YESphlox-TBH1.5	0.923868	-0.114242	0.827324	-0.273475	0.895419	-0.159365	0.827324	-0.273475	2	0.0995781	0.327973	0.484162	0.0269705	FALSE
SPAC1071.07c	YESphlox-TSA1000	0.945146	-0.0813916	0.846379	-0.240625	0.900544	-0.151131	0.83206	-0.265241	3	0.38712	0.620951	0.206943	0.0774253	FALSE
SPAC1071.07c	YESphlox-TSA500	0.989298	-0.0155235	0.885917	-0.174757	0.982249	-0.0258394	0.907551	-0.139949	3	0.730941	0.874191	0.0583937	0.0393073	FALSE
SPAC1071.07c	YESphlox-TeaTree1	1.03767	0.0533446	0.929232	-0.105889	1.04868	0.0685805	0.968934	-0.0455291	3	0.502895	0.702328	0.15346	0.0713426	FALSE
SPAC1071.07c	YESphlox-TeaTree10	0.980522	-0.0283788	0.878058	-0.187612	0.980871	-0.0278649	0.906278	-0.141975	3	0.690124	0.828508	0.0817032	0.0640642	FALSE
SPAC1071.07c	YESphlox-TeaTree100	0.996327	-0.00530876	0.892212	-0.164542	0.97125	-0.0420847	0.897389	-0.156194	3	0.84757	0.970269	0.0131079	0.0202597	FALSE
SPAC1071.07c	YESphlox-Temp25	0.97681	-0.0338496	0.874735	-0.193083	0.923801	-0.114346	0.853548	-0.228456	3	0.58611	0.837329	0.0771038	0.0544703	FALSE
SPAC1071.07c	YESphlox-Temp25Gluc0.1	0.998895	-0.00159576	0.894511	-0.160829	0.987503	-0.0181426	0.912406	-0.132252	6	0.973041	0.979427	0.00902807	0.0631211	FALSE
SPAC1071.07c	YESphlox-Temp25Gluc0.5	1.02239	0.0319515	0.915555	-0.127282	1.0054	0.00776474	0.928939	-0.106345	6	0.207995	0.365521	0.437087	0.0248405	FALSE
SPAC1071.07c	YESphlox-Temp25Gluc1	1.04019	0.0568406	0.931487	-0.102393	1.01717	0.0245679	0.939821	-0.0895418	6	0.0320739	0.116146	0.934995	0.025721	FALSE
SPAC1071.07c	YESphlox-Temp25Gluc3	0.981562	-0.0268487	0.87899	-0.186082	0.931749	-0.101987	0.860891	-0.216097	3	0.630788	0.919086	0.0366439	0.0490665	FALSE
SPAC1071.07c	YESphlox-Tuni20	1.20424	0.268119	1.0784	0.108886	1.17498	0.232642	1.08563	0.118532	3	0.00875069	0.0868338	1.06131	0.0452127	FALSE
SPAC1071.07c	YESphlox-Tuni40	0.987738	-0.0177997	0.88452	-0.177033	0.904129	-0.145399	0.835372	-0.259509	3	0.855966	0.948622	0.0229067	0.0911975	FALSE
SPAC1071.07c	YESphlox-Tuni60									0					FALSE
SPAC1071.07c	YESphlox-Tuni80	1.03205	0.0455163	0.924204	-0.113717	1.04366	0.0616467	0.964289	-0.052463	3	0.676451	0.85842	0.0663001	0.101932	FALSE
SPAC1071.07c	YESphlox-VPA10	0.950855	-0.0727034	0.851491	-0.231937	0.921575	-0.117827	0.851491	-0.231937	2	0.270124	0.400225	0.397696	0.033289	FALSE
SPAC1071.07c	YESphlox-VPA8	1.00209	0.00301647	0.897375	-0.156217	0.971235	-0.0421072	0.897375	-0.156217	2	0.873713	0.920005	0.0362098	0.00124188	FALSE
SPAC1071.07c	YESphlox-Xylose2	0.829112	-0.27036	0.742471	-0.429594	0.803581	-0.315484	0.742471	-0.429594	2	0.362491	0.643491	0.191457	0.139901	FALSE
SPAC1071.07c	Yesphlox-Caffeine10	0.915097	-0.128004	0.81947	-0.287237	0.82658	-0.274773	0.763721	-0.388883	4	0.56995	0.900268	0.045628	0.238448	FALSE
SPAC1071.07c	Yesphlox-DMSO	0.781415	-0.355838	0.699758	-0.515072	0.817136	-0.291351	0.754995	-0.405461	4	0.140425	0.498649	0.302205	0.196989	FALSE
SPAC1071.07c	Yesphlox-Gal2	0.848635	-0.236784	0.759953	-0.396017	0.807983	-0.307603	0.746538	-0.421712	3	0.365307	0.666476	0.176216	0.202188	FALSE
SPAC1071.07c	Yesphlox-Rapa1	0.897884	-0.155399	0.804056	-0.314633	0.952455	-0.0702766	0.880023	-0.184386	4	0.517493	0.837038	0.0772546	0.249508	FALSE
SPAC1071.07c	Yesphlox-Rapa100	0.96418	-0.0526261	0.863424	-0.211859	0.933209	-0.0997285	0.86224	-0.213838	3	0.00936356	0.23605	0.626997	0.0038963	FALSE
SPAC1071.07c	Yesphlox-Sorb1.2	0.658597	-0.602532	0.589774	-0.761765	0.616082	-0.698805	0.569231	-0.812914	3	0.119082	0.547319	0.26176	0.20261	FALSE
SPAC1071.07c	Yesphlox-Torin5	0.687447	-0.54068	0.615609	-0.699913	0.712464	-0.489111	0.658283	-0.603221	4	0.036647	0.296286	0.528289	0.157852	FALSE
SPAC1071.09c	EMM-3AT4	0.973871	-0.0381978	0.990166	-0.0142575	0.972565	-0.0401341	0.995849	-0.00600046	3	0.204915	0.475189	0.323134	0.0135976	FALSE
SPAC1071.09c	EMM-3AT6	0.979614	-0.0297141	0.996006	-0.00577389	0.976618	-0.0341336	1	0	3	0.313261	0.533451	0.272905	0.012927	FALSE
SPAC1071.09c	EMM-Bleo200	0.98511	-0.021643	1.00159	0.00229722	0.97942	-0.0300008	1.00287	0.00413279	3	0.428639	0.592167	0.227556	0.00407386	FALSE
SPAC1071.09c	EMM-Canav60	0.894332	-0.161118	0.909296	-0.137177	0.883111	-0.179334	0.904254	-0.1452	3	0.0148988	0.122273	0.912671	0.0398835	FALSE
SPAC1071.09c	EMM-Cys	1.03495	0.0495548	1.05226	0.0734951	1.01659	0.0237417	1.04093	0.0578753	6	0.385509	0.72579	0.139189	0.0835516	FALSE
SPAC1071.09c	EMM-Met	1.08583	0.118793	1.10399	0.142733	1.03089	0.0438971	1.05558	0.0780307	6	0.218617	0.969361	0.0135145	0.148761	FALSE
SPAC1071.09c	EMMphlox-Act0.1	1.01445	0.0207016	1.06936	0.0967425	1.00614	0.008828	1.05861	0.0821686	4	0.634493	0.815289	0.0886885	0.0563861	FALSE
SPAC1071.09c	EMMphlox-Act1	0.986478	-0.0196406	1.03987	0.0564004	0.995232	-0.00689551	1.04713	0.0664451	3	0.553762	0.79789	0.0980568	0.0339204	FALSE
SPAC1071.09c	EMMphlox-Act2	1.00167	0.00241194	1.05589	0.0784529	1.00318	0.00458614	1.0555	0.0779268	4	0.838343	0.954579	0.020188	0.00480854	FALSE
SPAC1071.09c	EMMphlox-Cana75	0.969217	-0.045108	1.02167	0.0309329	0.97278	-0.039815	1.02351	0.0335256	6	0.00715274	0.0494993	1.3054	0.0156775	FALSE
SPAC1071.09c	EMMphlox-EtOH0.1	1.00486	0.00699229	1.05924	0.0830332	1.00382	0.00550573	1.05617	0.0788464	4	0.692597	0.848353	0.0714232	0.0189883	FALSE
SPAC1071.09c	YES-Bleo200	1.00156	0.00225189	1.00304	0.0043843	0.995709	-0.00620462	1.00269	0.00387007	3	0.910001	0.956566	0.0192849	0.0196866	FALSE
SPAC1071.09c	YES-Bleo300	1.01953	0.0279028	1.02104	0.0300352	1.01393	0.0199605	1.02104	0.0300352	1					FALSE
SPAC1071.09c	YES-Bleo600	1.00943	0.0135402	1.01092	0.0156726	1.00389	0.00559786	1.01092	0.0156726	2	0.550835	0.789306	0.102755	0.0159574	FALSE
SPAC1071.09c	YES-Bortezomib100	0.968023	-0.0468874	0.969454	-0.044755	0.959839	-0.0591358	0.966565	-0.0490611	3	0.179494	0.270378	0.568029	0.0284034	FALSE
SPAC1071.09c	YES-Bortezomib200	0.977585	-0.0327054	0.979031	-0.030573	0.970092	-0.0438072	0.97689	-0.0337325	3	0.176693	0.265595	0.57578	0.019984	FALSE
SPAC1071.09c	YES-Bref60	1.62419	0.699722	1.62659	0.701854	1.61895	0.695058	1.63029	0.705132	3	0.00514219	0.0460029	1.33722	0.0821395	TRUE
SPAC1071.09c	YES-Calco10KCl0.5	1.0383	0.0542214	1.03983	0.0563539	1.03094	0.0439595	1.03816	0.0540341	3	3.05742e-05	0.000344773	3.46247	0.00648459	FALSE
SPAC1071.09c	YES-Calco2	0.945176	-0.0813447	0.946574	-0.0792123	0.921932	-0.117268	0.928392	-0.107194	3	0.106447	0.484072	0.31509	0.0356708	FALSE
SPAC1071.09c	YES-Calco4KCl0.5	0.941338	-0.0872149	0.942731	-0.0850825	0.923146	-0.115369	0.929616	-0.105294	3	0.259292	0.571402	0.243059	0.0655773	FALSE
SPAC1071.09c	YES-Cana120	0.964627	-0.0519572	0.966054	-0.0498248	0.959539	-0.0595862	0.966263	-0.0495115	3	1.37893e-06	0.000329564	3.48206	0.00334465	FALSE
SPAC1071.09c	YES-Cana60	0.942147	-0.0859755	0.943541	-0.0838431	0.941864	-0.08641	0.948464	-0.0763353	3	0.0293628	0.213792	0.670009	0.0226615	FALSE
SPAC1071.09c	YES-CoCl0.25	0.989963	-0.0145538	0.991427	-0.0124214	0.993041	-0.0100747	1	0	3	0.766203	0.897539	0.0469466	0.0506921	FALSE
SPAC1071.09c	YES-CoCl5	0.983023	-0.0247026	0.984477	-0.0225702	0.98261	-0.0253097	0.989495	-0.015235	3	0.347033	0.536615	0.270337	0.024023	FALSE
SPAC1071.09c	YES-Cycloh100	1.00399	0.00573794	1.00547	0.00787034	0.993041	-0.0100747	1	0	3	0.634629	0.896746	0.0473308	0.00962189	FALSE
SPAC1071.09c	YES-Cycloh200	1.0008	0.00115589	1.00228	0.00328829	0.983989	-0.0232858	0.990885	-0.0132111	3	0.960718	0.983269	0.00732773	0.0237565	FALSE
SPAC1071.09c	YES-Cycloh400	1.00539	0.00775355	1.00688	0.00988596	1.00081	0.00116731	1.00782	0.011242	3	0.811045	0.923778	0.0344325	0.0335349	FALSE
SPAC1071.09c	YES-Cycloh600	1.03357	0.0476305	1.03509	0.0497629	1.02643	0.0376397	1.03363	0.0477144	3	0.0754807	0.354686	0.450156	0.0198954	FALSE
SPAC1071.09c	YES-Dhcumarin100	1.0026	0.00374418	1.00408	0.00587658	0.993314	-0.00967783	1.00028	0.000396868	3	0.83725	0.94993	0.0223083	0.0176604	FALSE
SPAC1071.09c	YES-Dhcumarin200	1.03931	0.0556213	1.04084	0.0577537	1.03545	0.0502552	1.0427	0.0603299	3	0.00148726	0.0317733	1.49794	0.0100206	FALSE
SPAC1071.09c	YES-Dhcumarin50	1.03704	0.0524672	1.03857	0.0545996	1.03516	0.0498525	1.04241	0.0599272	3	0.034941	0.230999	0.636391	0.0168892	FALSE
SPAC1071.09c	YES-EDTA0.1	1.04644	0.0654846	1.04798	0.067617	1.04351	0.0614392	1.05082	0.0715139	3	0.0183	0.0994023	1.0026	0.0170357	FALSE
SPAC1071.09c	YES-EDTA0.3	1.05799	0.0813306	1.05956	0.083463	1.04182	0.0591074	1.04912	0.0691821	3	0.0673282	0.263794	0.578735	0.0304569	FALSE
SPAC1071.09c	YES-EDTA0.6	1.0267	0.0380152	1.02822	0.0401476	1.02365	0.0337275	1.03083	0.0438022	3	0.064867	0.161492	0.79185	0.0154089	FALSE
SPAC1071.09c	YES-EtOH5	0.968699	-0.0458796	0.970132	-0.0437472	0.970313	-0.0434772	0.977113	-0.0334026	3	0.0154376	0.0670833	1.17339	0.0121517	FALSE
SPAC1071.09c	YES-Forma2	0.907319	-0.140319	0.908661	-0.138186	0.901305	-0.149912	0.907621	-0.139838	3	4.94728e-05	0.000370966	3.43067	0.0117516	TRUE
SPAC1071.09c	YES-Forma3	0.934816	-0.0972463	0.936198	-0.0951139	0.921656	-0.1177	0.928114	-0.107625	3	0.0743032	0.195148	0.709636	0.0352251	FALSE
SPAC1071.09c	YES-HU30	1.02284	0.0325737	1.02435	0.0347061	0.993041	-0.0100747	1	0	3	0.448621	0.645907	0.18983	0.0421722	FALSE
SPAC1071.09c	YES-HU45	1.02125	0.0303326	1.02276	0.032465	0.989609	-0.0150698	0.996544	-0.00499515	3	0.547961	0.719576	0.142923	0.0511165	FALSE
SPAC1071.09c	YES-KCl0.5SDS0.01	1.01579	0.0225983	1.01729	0.0247307	0.997192	-0.00405631	1.00418	0.00601838	3	0.376773	0.533762	0.272652	0.0240363	FALSE
SPAC1071.09c	YES-KCl1SDS0.01	1.15879	0.212618	1.1605	0.21475	1.15827	0.211973	1.16639	0.222048	3	0.0410754	0.133917	0.873164	0.0601297	FALSE
SPAC1071.09c	YES-Ovana6	1.15929	0.213239	1.161	0.215371	1.15292	0.205297	1.161	0.215371	2	0.407141	0.687035	0.163021	0.168042	FALSE
SPAC1071.09c	YES-SDS0.01	0.985456	-0.0211368	0.986914	-0.0190044	1.0007	0.00101409	1.00772	0.0110888	4	0.678828	0.895312	0.0480255	0.0630897	FALSE
SPAC1071.09c	YES-SDS0.02	0.981933	-0.026303	0.983386	-0.0241706	0.993041	-0.0100747	1	0	3	0.475711	0.593795	0.226363	0.0356591	FALSE
SPAC1071.09c	YES-TBH15	0.502101	-0.99395	0.502844	-0.991818	0.499345	-1.00189	0.502844	-0.991818	1					FALSE
SPAC1071.09c	YES-UV1000	0.930238	-0.104328	0.931614	-0.102196	0.910676	-0.13499	0.917058	-0.124915	3	0.316414	0.908841	0.0415119	0.0914769	FALSE
SPAC1071.09c	YES-UV10m	0.969713	-0.0443695	0.971148	-0.0422371	0.960956	-0.057458	0.96769	-0.0473833	3	0.183253	0.471759	0.32628	0.027288	FALSE
SPAC1071.09c	YES-UV2000	0.886626	-0.173602	0.887938	-0.17147	0.854576	-0.226719	0.860565	-0.216644	3	0.224755	0.786899	0.104081	0.113578	FALSE
SPAC1071.09c	YES-UV20m	1.0082	0.0117809	1.00969	0.0139133	0.996324	-0.0053135	1.00331	0.0047612	3	0.428484	0.540968	0.266829	0.0130236	FALSE
SPAC1071.09c	YES-UV3000	0.974896	-0.0366802	0.976338	-0.0345478	0.958324	-0.0614148	0.965039	-0.0513401	3	0.150285	0.638711	0.194696	0.0204991	FALSE
SPAC1071.09c	YES-UV4000	0.951127	-0.0722906	0.952534	-0.0701581	0.954016	-0.0679147	0.960701	-0.05784	3	0.225718	0.598393	0.223013	0.0495387	FALSE
SPAC1071.09c	YES-UV5m	0.971525	-0.0416768	0.972962	-0.0395444	0.966722	-0.0488273	0.973496	-0.0387526	3	0.382112	0.728787	0.137399	0.0444118	FALSE
SPAC1071.09c	YES-UV6000	0.984773	-0.0221375	0.986229	-0.0200051	0.987713	-0.0178362	0.994635	-0.00776151	3	0.568424	0.778802	0.108573	0.038575	FALSE
SPAC1071.09c	YES-UV9000	1.00915	0.0131337	1.01064	0.0152661	1.00744	0.0106957	1.0145	0.0207704	3	0.312474	0.5677	0.245881	0.0104648	FALSE
SPAC1071.09c	YES-VPA5	1.00471	0.00677938	1.0062	0.00891179	0.999288	-0.00102813	1.00629	0.00904657	3	0.500676	0.592384	0.227397	0.00614983	FALSE
SPAC1071.09c	YESphlox-Act0.1	1.02341	0.0333907	1.03416	0.0484624	1.01214	0.0174081	1.01767	0.0252645	4	0.262577	0.59173	0.227877	0.0341125	FALSE
SPAC1071.09c	YESphlox-Act1	1.03741	0.0529889	1.04831	0.0680606	1.02304	0.0328637	1.02863	0.0407201	4	0.211523	0.587837	0.230743	0.0477412	FALSE
SPAC1071.09c	YESphlox-Act2	1.05668	0.0795341	1.06777	0.0946058	1.01689	0.0241679	1.02245	0.0320243	3	0.395937	0.900875	0.0453353	0.0925344	FALSE
SPAC1071.09c	YESphlox-Aged7	0.994917	-0.00735241	1.00536	0.0077193	0.992833	-0.0103776	0.998254	-0.00252122	6	0.654948	0.851156	0.0699908	0.0240899	FALSE
SPAC1071.09c	YESphlox-Benza12	1.00697	0.0100278	1.01755	0.0250995	1.02005	0.028637	1.02562	0.0364934	3	0.530045	0.696048	0.157361	0.015215	FALSE
SPAC1071.09c	YESphlox-Benza4	0.986324	-0.019867	0.996682	-0.0047953	0.997254	-0.0039665	1.0027	0.00388984	3	0.545671	0.903092	0.0442682	0.032814	FALSE
SPAC1071.09c	YESphlox-Benza8	1.01029	0.0147694	1.0209	0.0298411	1.00797	0.0114541	1.01347	0.0193104	3	0.399318	0.593985	0.226224	0.0164367	FALSE
SPAC1071.09c	YESphlox-Bort500	0.75343	-0.408455	0.761342	-0.393384	0.738995	-0.436364	0.74303	-0.428508	3	0.015133	0.0568564	1.24522	0.0568168	FALSE
SPAC1071.09c	YESphlox-CdCl1	0.902915	-0.147338	0.912397	-0.132266	0.907442	-0.140123	0.912397	-0.132266	1					FALSE
SPAC1071.09c	YESphlox-Diamide2	0.981076	-0.0275635	0.991379	-0.0124918	0.975136	-0.036325	0.98046	-0.0284687	3	0.300892	0.540831	0.266938	0.0241133	FALSE
SPAC1071.09c	YESphlox-Diamide3	0.800865	-0.320369	0.809276	-0.305297	0.804881	-0.313153	0.809276	-0.305297	2	0.303112	0.706209	0.151067	0.147097	FALSE
SPAC1071.09c	YESphlox-Diamide3.5	0.871193	-0.198936	0.880342	-0.183864	0.85661	-0.22329	0.861287	-0.215433	3	0.0217766	0.0647854	1.18852	0.0375573	FALSE
SPAC1071.09c	YESphlox-EDTA4	0.941089	-0.0875963	0.950972	-0.0725246	0.994569	-0.00785633	1	0	3	0.530809	0.664206	0.177697	0.137152	FALSE
SPAC1071.09c	YESphlox-EGTA1	1.03373	0.04786	1.04459	0.0629317	1.03787	0.0536242	1.04354	0.0614806	3	0.00047953	0.00881598	2.05473	0.00766475	FALSE
SPAC1071.09c	YESphlox-EGTA10	0.937842	-0.0925833	0.947691	-0.0775116	0.927776	-0.108152	0.932842	-0.100296	3	0.140643	0.35286	0.452397	0.0466905	FALSE
SPAC1071.09c	YESphlox-EGTA15	0.953337	-0.0689422	0.963348	-0.0538705	0.958117	-0.0617268	0.963348	-0.0538705	2	0.527326	0.840085	0.0756768	0.0728579	FALSE
SPAC1071.09c	YESphlox-EGTA5	1.06362	0.08898	1.07479	0.104052	1.06232	0.0872181	1.06812	0.0950744	3	0.0017985	0.0390765	1.40808	0.0130903	TRUE
SPAC1071.09c	YESphlox-EtOH0.1	1.08714	0.120533	1.09855	0.135605	1.09916	0.136398	1.10516	0.144254	4	0.012365	0.264244	0.577995	0.0356696	FALSE
SPAC1071.09c	YESphlox-EtOH10	0.944625	-0.0821869	0.954545	-0.0671152	0.953508	-0.0686828	0.958715	-0.0608264	4	0.149863	0.568529	0.245247	0.0583478	FALSE
SPAC1071.09c	YESphlox-Forma2.5	0.920456	-0.11958	0.930122	-0.104508	0.926438	-0.110233	0.931497	-0.102377	3	0.0321395	0.105224	0.977886	0.0292476	FALSE
SPAC1071.09c	YESphlox-Gluc0.1Aged7	0.985729	-0.0207372	0.996081	-0.00566545	1.01963	0.0280401	1.02519	0.0358964	5	0.593795	0.716752	0.144631	0.0549286	FALSE
SPAC1071.09c	YESphlox-Gluc0.5Aged7	1.00365	0.0052615	1.01419	0.0203332	1.0185	0.0264491	1.02406	0.0343055	12	0.764723	0.835029	0.0782987	0.0381587	FALSE
SPAC1071.09c	YESphlox-Gluc1Aged7	0.990324	-0.0140282	1.00072	0.00104354	0.998504	-0.00215973	1.00396	0.0056966	6	0.170773	0.318645	0.496693	0.011436	FALSE
SPAC1071.09c	YESphlox-Glycerol2	0.994893	-0.00738666	1.00534	0.00768504	0.98149	-0.0269541	0.98685	-0.0190978	3	0.841768	0.935232	0.0290808	0.0389168	FALSE
SPAC1071.09c	YESphlox-Glycerol2MMS0.0075	0.824142	-0.279035	0.832797	-0.263963	0.831534	-0.266154	0.836074	-0.258297	3	0.0017983	0.0104389	1.98134	0.0223186	TRUE
SPAC1071.09c	YESphlox-Glycerol3	1.02656	0.0378203	1.03734	0.052892	1.03845	0.0544268	1.04412	0.0622831	3	0.14029	0.466518	0.331132	0.020895	FALSE
SPAC1071.09c	YESphlox-Glycerol3MMS0.005	0.86874	-0.203004	0.877863	-0.187932	0.869806	-0.201234	0.874556	-0.193378	3	0.00583632	0.021795	1.66164	0.0247111	TRUE
SPAC1071.09c	YESphlox-HP10	1.03176	0.0451138	1.0426	0.0601855	1.00257	0.00370483	1.00805	0.0115612	5	0.4539	0.695398	0.157767	0.0861799	FALSE
SPAC1071.09c	YESphlox-HP15	0.964844	-0.0516331	0.974976	-0.0365614	0.93607	-0.0953112	0.941182	-0.0874548	3	0.497777	0.643074	0.191739	0.0748048	FALSE
SPAC1071.09c	YESphlox-HP2	1.03676	0.052077	1.04764	0.0671487	1.03479	0.0493445	1.04045	0.0572009	6	0.0848213	0.529224	0.276361	0.042187	FALSE
SPAC1071.09c	YESphlox-HP4	1.02573	0.0366489	1.0365	0.0517206	1.02813	0.0400264	1.03375	0.0478827	9	0.0310451	0.18097	0.742393	0.0284688	FALSE
SPAC1071.09c	YESphlox-HP6	1.02294	0.0327233	1.03368	0.047795	1.01062	0.0152374	1.01614	0.0230938	8	0.254544	0.486688	0.31275	0.0515195	FALSE
SPAC1071.09c	YESphlox-HP8	1.06238	0.0872938	1.07353	0.102366	1.02762	0.0393012	1.03323	0.0471576	8	0.314893	0.48622	0.313168	0.164251	FALSE
SPAC1071.09c	YESphlox-HU8	0.948561	-0.076187	0.958523	-0.0611153	0.939451	-0.0901102	0.944581	-0.0822538	3	0.109443	0.216173	0.665199	0.0340064	FALSE
SPAC1071.09c	YESphlox-HU8MMS0.075	0.897798	-0.155537	0.907227	-0.140465	0.880896	-0.182956	0.885706	-0.1751	3	0.0365927	0.200594	0.697681	0.0381108	FALSE
SPAC1071.09c	YESphlox-KCl0.5	0.964881	-0.0515772	0.975014	-0.0365055	0.978199	-0.0318008	0.98354	-0.0239445	3	0.132554	0.301717	0.5204	0.0263199	FALSE
SPAC1071.09c	YESphlox-KCl0.5SDS0.004	1.01277	0.0183044	1.0234	0.0333761	1.02148	0.0306546	1.02705	0.038511	3	0.480302	0.597823	0.223428	0.025593	FALSE
SPAC1071.09c	YESphlox-KCl1	1.00041	0.000588138	1.01091	0.0156598	0.992098	-0.0114452	0.997515	-0.00358888	3	0.983041	0.995537	0.00194244	0.029006	FALSE
SPAC1071.09c	YESphlox-LiCl4	0.998947	-0.00152019	1.00944	0.0135515	0.999561	-0.000633928	1.00502	0.00722241	3	0.907962	0.951673	0.0215121	0.0122593	FALSE
SPAC1071.09c	YESphlox-LiCl6	1.00747	0.0107332	1.01805	0.0258049	1.02551	0.0363421	1.03111	0.0441985	3	0.777841	0.829928	0.0809594	0.0400778	FALSE
SPAC1071.09c	YESphlox-MMS0.005	0.880292	-0.183946	0.889536	-0.168874	0.888329	-0.170834	0.89318	-0.162978	3	7.98377e-05	0.000795051	3.09961	0.0124237	TRUE
SPAC1071.09c	YESphlox-MMS0.075	0.788856	-0.342165	0.797141	-0.327094	0.796746	-0.327808	0.801097	-0.319952	6	0.0011978	0.00307823	2.5117	0.0812585	TRUE
SPAC1071.09c	YESphlox-NaCl150	0.984643	-0.0223271	0.994984	-0.00725542	0.987139	-0.0186751	0.992529	-0.0108187	3	0.184876	0.435849	0.360664	0.014134	FALSE
SPAC1071.09c	YESphlox-NaCl150MMS0.005	0.940347	-0.0887344	0.950223	-0.0736627	0.945149	-0.0813864	0.95031	-0.07353	3	1.05104e-16	2.51199e-14	13.6	0.00132175	TRUE
SPAC1071.09c	YESphlox-Ovana0.5	1.01068	0.0153266	1.02129	0.0303983	1.02058	0.0293901	1.02615	0.0372464	3	0.165484	0.307789	0.511748	0.00855602	FALSE
SPAC1071.09c	YESphlox-Ovana1	1.06232	0.0872191	1.07348	0.102291	1.07717	0.107248	1.08305	0.115104	3	0.0949595	0.187565	0.726849	0.0378243	FALSE
SPAC1071.09c	YESphlox-Ovana4	1.04111	0.058126	1.05205	0.0731977	1.05182	0.0728925	1.05757	0.0807488	3	0.145474	0.433554	0.362957	0.0320613	FALSE
SPAC1071.09c	YESphlox-Phloxine2	1.0082	0.0117842	1.01879	0.0268559	1.00879	0.0126223	1.0143	0.0204786	3	0.579753	0.774083	0.111212	0.0211981	FALSE
SPAC1071.09c	YESphlox-Phloxine2HP10	0.972169	-0.0407206	0.982379	-0.0256489	0.994569	-0.00785633	1	0	3	0.322512	0.490958	0.308956	0.0375253	FALSE
SPAC1071.09c	YESphlox-Phloxine2HP15	0.983607	-0.0238462	0.993936	-0.00877445	0.957498	-0.0626582	0.962727	-0.0548019	3	0.82496	0.853816	0.0686356	0.113943	FALSE
SPAC1071.09c	YESphlox-SDS0.004	0.997635	-0.00341589	1.00811	0.0116558	1.00698	0.0100404	1.01248	0.0178967	3	0.850892	0.942257	0.0258308	0.0182282	FALSE
SPAC1071.09c	YESphlox-TBH1	0.903908	-0.145752	0.913401	-0.13068	0.891894	-0.165057	0.896764	-0.1572	3	0.051339	0.126495	0.897927	0.041913	FALSE
SPAC1071.09c	YESphlox-TBH1.5	0.553432	-0.853522	0.559244	-0.83845	0.556207	-0.846306	0.559244	-0.83845	2	0.0849862	0.30066	0.521925	0.0875401	FALSE
SPAC1071.09c	YESphlox-TSA1000	0.989746	-0.0148692	1.00014	0.000202517	1.01306	0.0187129	1.01859	0.0265692	3	0.641705	0.798739	0.0975953	0.0325718	FALSE
SPAC1071.09c	YESphlox-TSA500	0.999857	-0.000205646	1.01036	0.0148661	1.0191	0.0272908	1.02466	0.0351472	3	0.993975	0.998216	0.000775528	0.0285173	FALSE
SPAC1071.09c	YESphlox-TeaTree1	0.989938	-0.01459	1.00033	0.000481671	1.03737	0.0529275	1.04303	0.0607838	3	0.855241	0.933703	0.0297911	0.0848805	FALSE
SPAC1071.09c	YESphlox-TeaTree10	0.990464	-0.0138242	1.00087	0.00124753	1.00335	0.0048195	1.00882	0.0126758	3	0.449626	0.66508	0.177126	0.01728	FALSE
SPAC1071.09c	YESphlox-TeaTree100	1.02709	0.0385606	1.03787	0.0536323	1.02924	0.041582	1.03486	0.0494383	3	0.31913	0.794501	0.0999056	0.0362033	FALSE
SPAC1071.09c	YESphlox-Temp25	1.03009	0.0427708	1.04091	0.0578425	1.01688	0.0241482	1.02243	0.0320046	3	0.250384	0.700742	0.154442	0.0332946	FALSE
SPAC1071.09c	YESphlox-Temp25Gluc0.1	0.998541	-0.00210692	1.00903	0.0129648	1.02447	0.034878	1.03006	0.0427343	6	0.960513	0.976527	0.0103156	0.0685089	FALSE
SPAC1071.09c	YESphlox-Temp25Gluc0.5	1.00739	0.0106286	1.01797	0.0257003	1.01229	0.017625	1.01782	0.0254813	6	0.460297	0.588294	0.230406	0.0202606	FALSE
SPAC1071.09c	YESphlox-Temp25Gluc1	1.00947	0.0135943	1.02007	0.028666	1.01107	0.0158899	1.0166	0.0237462	6	0.328075	0.502628	0.298753	0.019099	FALSE
SPAC1071.09c	YESphlox-Temp25Gluc3	1.02444	0.0348312	1.0352	0.0499029	1.0253	0.0360512	1.0309	0.0439075	3	0.233329	0.864009	0.0634818	0.0258558	FALSE
SPAC1071.09c	YESphlox-Tuni20	0.775093	-0.367559	0.783233	-0.352487	0.778979	-0.360343	0.783233	-0.352487	1					FALSE
SPAC1071.09c	YESphlox-Tuni40	0.996595	-0.00492099	1.00706	0.0101507	1.00159	0.00229438	1.00706	0.0101507	2	0.926822	0.976798	0.0101953	0.0420098	FALSE
SPAC1071.09c	YESphlox-Tuni60	0.961092	-0.0572529	0.971185	-0.0421812	0.852826	-0.229676	0.857483	-0.22182	3	0.827877	0.903138	0.0442458	0.275508	FALSE
SPAC1071.09c	YESphlox-Tuni80	0.989046	-0.01589	0.999433	-0.000818247	1.0201	0.0287053	1.02567	0.0365616	3	0.734996	0.887204	0.0519767	0.0489533	FALSE
SPAC1071.09c	YESphlox-VPA10	0.955625	-0.0654834	0.965661	-0.0504117	0.975966	-0.0350971	0.981295	-0.0272407	3	0.171588	0.318466	0.496936	0.0379528	FALSE
SPAC1071.09c	YESphlox-VPA8	1.00674	0.00969416	1.01731	0.0247659	1.01179	0.0169095	1.01731	0.0247659	2	0.705877	0.823523	0.0843242	0.0192613	FALSE
SPAC1071.09c	YESphlox-Xylose2	1.00564	0.0081132	1.0162	0.0231849	1.01068	0.0153286	1.0162	0.0231849	2	0.298797	0.616445	0.210106	0.0026293	FALSE
SPAC1071.09c	Yesphlox-Caffeine10	1.07866	0.10924	1.08999	0.124312	1.0972	0.133824	1.10319	0.14168	4	0.448335	0.892933	0.0491811	0.182612	FALSE
SPAC1071.09c	Yesphlox-DMSO	1.0589	0.0825717	1.07002	0.0976434	1.04265	0.060254	1.04834	0.0681103	4	0.151608	0.498649	0.302205	0.0624164	FALSE
SPAC1071.09c	Yesphlox-Gal2	1.11615	0.158535	1.12787	0.173607	1.09923	0.136495	1.10523	0.144352	4	0.111199	0.481627	0.317289	0.10516	FALSE
SPAC1071.09c	Yesphlox-Rapa1	0.997022	-0.00430337	1.00749	0.0107683	0.999811	-0.000273351	1.00527	0.00758298	4	0.923812	0.955806	0.0196305	0.0573285	FALSE
SPAC1071.09c	Yesphlox-Rapa100	1.02001	0.0285771	1.03072	0.0436488	1.00798	0.0114701	1.01349	0.0193264	3	0.551732	0.82415	0.0839935	0.0491335	FALSE
SPAC1071.09c	Yesphlox-Sorb1.2	1.08207	0.1138	1.09344	0.128872	1.09772	0.134513	1.10372	0.142369	3	0.0331253	0.458434	0.338723	0.0303589	FALSE
SPAC1071.09c	Yesphlox-Torin5	0.998281	-0.00248183	1.00876	0.0125899	0.979152	-0.0303953	0.984499	-0.0225389	4	0.98338	0.997451	0.00110854	0.153399	FALSE
SPAC10F6.14c	EMM-3AT4	1.07216	0.100525	1.04848	0.0683037	1.07602	0.105704	1.05562	0.0780942	3	0.000965665	0.0255365	1.59284	0.0159939	TRUE
SPAC10F6.14c	EMM-3AT6	1.03689	0.0522645	1.01399	0.0200435	1.03051	0.0433627	1.01098	0.0157533	3	0.00668621	0.0570098	1.24405	0.00599721	FALSE
SPAC10F6.14c	EMM-Bleo200	1.04992	0.0702753	1.02673	0.0380544	1.03875	0.0548448	1.01906	0.0272354	3	0.0809659	0.211	0.675717	0.0301996	FALSE
SPAC10F6.14c	EMM-Canav60	1.01132	0.0162403	0.988984	-0.0159806	1.01609	0.0230343	0.996834	-0.00457505	3	0.474448	0.672135	0.172544	0.0175722	FALSE
SPAC10F6.14c	EMM-Cys	0.9733	-0.0390431	0.951804	-0.0712641	0.992414	-0.0109865	0.973602	-0.0385959	6	0.381534	0.72579	0.139189	0.0632006	FALSE
SPAC10F6.14c	EMM-Met	1.04905	0.0690861	1.02588	0.0368652	0.981474	-0.0269775	0.96287	-0.0545869	6	0.573812	0.974361	0.0112802	0.194114	FALSE
SPAC10F6.14c	EMMphlox-Act0.1	1.01289	0.018479	0.995041	-0.00717281	0.998095	-0.00275065	0.993885	-0.00884915	4	0.294304	0.658688	0.18132	0.0171769	FALSE
SPAC10F6.14c	EMMphlox-Act1	0.990175	-0.0142447	0.972725	-0.0398965	0.990986	-0.0130641	0.986805	-0.0191626	4	0.657154	0.844408	0.0734476	0.0375776	FALSE
SPAC10F6.14c	EMMphlox-Act2	1.00787	0.0113137	0.990111	-0.0143381	0.997099	-0.00419071	0.992893	-0.0102892	4	0.680405	0.954579	0.020188	0.0319357	FALSE
SPAC10F6.14c	EMMphlox-Cana75	1.0285	0.0405437	1.01038	0.0148919	1.00937	0.0134536	1.00511	0.00735506	6	0.00766307	0.0494993	1.3054	0.013093	FALSE
SPAC10F6.14c	EMMphlox-EtOH0.1	1.01059	0.0151909	0.992775	-0.0104608	0.997838	-0.00312234	0.993629	-0.00922084	4	0.217881	0.589796	0.229298	0.00672848	FALSE
SPAC10F6.14c	YES-Bleo200	1.04203	0.0594024	1.0196	0.0280011	1.03603	0.0510725	1.01443	0.0206642	3	0.0760779	0.298076	0.525673	0.0226321	FALSE
SPAC10F6.14c	YES-Bleo300	1.022	0.0314013	1	0	1.0213	0.0304083	1	0	1					FALSE
SPAC10F6.14c	YES-Bleo600	1.01555	0.0222544	0.99368	-0.00914691	1.01485	0.0212614	0.99368	-0.00914691	2	0.181576	0.449162	0.347597	0.00893796	FALSE
SPAC10F6.14c	YES-Bortezomib100	1.00209	0.00301309	0.980515	-0.0283882	1.00513	0.00738387	0.984167	-0.0230244	3	0.765253	0.817793	0.0873566	0.00883369	FALSE
SPAC10F6.14c	YES-Bortezomib200	0.995544	-0.00644276	0.97411	-0.037844	0.993336	-0.00964693	0.972618	-0.0400552	3	0.419556	0.50137	0.299842	0.00570053	FALSE
SPAC10F6.14c	YES-Bref60	0.994278	-0.00827901	0.972871	-0.0396803	0.992552	-0.0107856	0.97185	-0.0411939	3	0.754571	0.823168	0.0845114	0.0266341	FALSE
SPAC10F6.14c	YES-Calco10KCl0.5	0.996607	-0.00490306	0.97515	-0.0363044	0.993001	-0.0101333	0.97229	-0.0405416	3	0.54461	0.664703	0.177372	0.00595867	FALSE
SPAC10F6.14c	YES-Calco2	0.983121	-0.0245585	0.961954	-0.0559598	0.980847	-0.0279004	0.960389	-0.0583087	3	0.105582	0.484072	0.31509	0.0114878	FALSE
SPAC10F6.14c	YES-Calco4KCl0.5	0.984923	-0.0219167	0.963717	-0.053318	0.992317	-0.0111265	0.971621	-0.0415348	3	0.30952	0.625675	0.203651	0.0190206	FALSE
SPAC10F6.14c	YES-Cana120	0.98821	-0.0171104	0.966933	-0.0485117	0.985376	-0.0212537	0.964824	-0.051662	3	0.551148	0.840631	0.0753948	0.0278488	FALSE
SPAC10F6.14c	YES-Cana60	0.98188	-0.0263818	0.960739	-0.0577831	0.972004	-0.0409654	0.951731	-0.0713738	3	0.3775	0.694019	0.158628	0.0272746	FALSE
SPAC10F6.14c	YES-CoCl0.25	0.992363	-0.0110594	0.970997	-0.0424607	0.982544	-0.0254064	0.962051	-0.0558147	3	0.651605	0.856003	0.0675247	0.0241899	FALSE
SPAC10F6.14c	YES-CoCl5	0.998786	-0.0017525	0.977282	-0.0331538	0.994166	-0.00844069	0.973431	-0.038849	3	0.903013	0.934339	0.0294954	0.0139326	FALSE
SPAC10F6.14c	YES-Cycloh100	1.01905	0.0272268	0.997111	-0.00417449	1.0213	0.0304083	1	0	3	0.035862	0.307639	0.511959	0.00897604	FALSE
SPAC10F6.14c	YES-Cycloh200	1.01824	0.0260799	0.996318	-0.00532142	1.02514	0.0358148	1.00375	0.00540652	3	0.260386	0.725272	0.139499	0.0201862	FALSE
SPAC10F6.14c	YES-Cycloh400	1.01496	0.0214257	0.993109	-0.00997558	1.01738	0.0248571	0.99616	-0.00555117	3	0.0720377	0.501907	0.299377	0.00882071	FALSE
SPAC10F6.14c	YES-Cycloh600	1.01076	0.0154337	0.988993	-0.0159676	1.01022	0.0146694	0.98915	-0.0157389	3	0.0183881	0.219138	0.659282	0.0024243	FALSE
SPAC10F6.14c	YES-Dhcumarin100	0.976952	-0.033641	0.955917	-0.0650422	0.976229	-0.034708	0.955868	-0.0651163	3	0.0963939	0.40148	0.396336	0.0147257	FALSE
SPAC10F6.14c	YES-Dhcumarin200	0.984034	-0.0232198	0.962847	-0.054621	0.983357	-0.0242127	0.962847	-0.054621	2	0.441057	0.757328	0.120716	0.0189569	FALSE
SPAC10F6.14c	YES-Dhcumarin50	0.983333	-0.0242481	0.962161	-0.0556494	0.969032	-0.0453844	0.948821	-0.0757927	3	0.358119	0.728482	0.137581	0.0238577	FALSE
SPAC10F6.14c	YES-EDTA0.1	1.00789	0.0113347	0.986187	-0.0200666	1.0213	0.0304083	1	0	3	0.638128	0.790221	0.102251	0.0239245	FALSE
SPAC10F6.14c	YES-EDTA0.3	1.01171	0.0167899	0.989923	-0.0146114	1.00585	0.00841343	0.98487	-0.0219949	3	0.414993	0.635791	0.196685	0.0192467	FALSE
SPAC10F6.14c	YES-EDTA0.6	1.01453	0.0208111	0.992686	-0.0105902	1.01333	0.0191024	0.992194	-0.0113059	3	0.0905732	0.206162	0.685791	0.00932291	FALSE
SPAC10F6.14c	YES-EtOH5	0.785129	-0.348998	0.768225	-0.380399	0.784167	-0.350767	0.767812	-0.381175	3	2.44826e-05	0.000344197	3.46319	0.0116598	TRUE
SPAC10F6.14c	YES-Forma2	0.994273	-0.0082862	0.972866	-0.0396875	0.992577	-0.0107487	0.971875	-0.041157	3	0.230939	0.367962	0.434197	0.00370971	FALSE
SPAC10F6.14c	YES-Forma3	1.06629	0.0925974	1.04333	0.0611961	1.05454	0.0766084	1.03254	0.0462	3	0.0723482	0.192125	0.716417	0.0334109	FALSE
SPAC10F6.14c	YES-HU30	1.04772	0.0672471	1.02516	0.0358458	1.05544	0.0778471	1.03343	0.0474388	3	0.0685518	0.212778	0.672074	0.0241831	FALSE
SPAC10F6.14c	YES-HU45	1.02094	0.029895	0.998956	-0.0015063	1.02024	0.028902	0.998956	-0.0015063	2	0.475511	0.672469	0.172328	0.0272259	FALSE
SPAC10F6.14c	YES-KCl0.5SDS0.01	0.936353	-0.0948756	0.916193	-0.126277	0.934151	-0.0982718	0.914668	-0.12868	3	0.000396209	0.00942976	2.0255	0.00955857	TRUE
SPAC10F6.14c	YES-KCl1SDS0.01	0.947485	-0.0778249	0.927085	-0.109226	0.943877	-0.0833292	0.924191	-0.113737	3	0.00782871	0.0551157	1.25872	0.0133418	FALSE
SPAC10F6.14c	YES-Ovana6	0.880444	-0.183697	0.861488	-0.215098	0.879838	-0.18469	0.861488	-0.215098	1					FALSE
SPAC10F6.14c	YES-SDS0.01	0.894521	-0.160813	0.875261	-0.192214	0.964685	-0.0518707	0.944564	-0.082279	4	0.252271	0.822601	0.084811	0.145961	FALSE
SPAC10F6.14c	YES-SDS0.02									0					FALSE
SPAC10F6.14c	YES-TBH15	0.868068	-0.204119	0.849378	-0.235521	0.867471	-0.205112	0.849378	-0.235521	1					FALSE
SPAC10F6.14c	YES-UV1000	1.00207	0.00298954	0.980499	-0.0284118	0.996501	-0.00505694	0.975717	-0.0354652	3	0.871549	0.976825	0.010183	0.0184642	FALSE
SPAC10F6.14c	YES-UV10m	0.99259	-0.0107298	0.971219	-0.0421311	0.991907	-0.0117228	0.971219	-0.0421311	2	0.631121	0.801994	0.0958288	0.0157453	FALSE
SPAC10F6.14c	YES-UV2000	0.921114	-0.118549	0.901282	-0.14995	0.973926	-0.0381158	0.953613	-0.0685241	3	0.396814	0.786899	0.104081	0.125003	FALSE
SPAC10F6.14c	YES-UV20m	0.945752	-0.0804657	0.92539	-0.111867	0.944911	-0.081749	0.925204	-0.112157	3	1.32159e-15	1.5793e-13	12.8015	0.000630046	TRUE
SPAC10F6.14c	YES-UV3000	1.01894	0.0270628	0.996997	-0.00433852	1.01251	0.0179385	0.991394	-0.0124698	3	0.142871	0.619398	0.20803	0.0146777	FALSE
SPAC10F6.14c	YES-UV4000	0.969561	-0.0445969	0.948686	-0.0759982	0.969503	-0.0446828	0.949282	-0.0750911	3	0.0357494	0.3178	0.497846	0.01319	FALSE
SPAC10F6.14c	YES-UV5m	0.981011	-0.0276593	0.959889	-0.0590606	0.971921	-0.0410896	0.951649	-0.0714979	3	0.511376	0.728787	0.137399	0.0404851	FALSE
SPAC10F6.14c	YES-UV6000	0.972358	-0.0404402	0.951423	-0.0718415	0.969341	-0.0449234	0.949124	-0.0753318	3	0.0970301	0.576696	0.239053	0.0173649	FALSE
SPAC10F6.14c	YES-UV9000	0.959244	-0.060031	0.93859	-0.0914323	0.957672	-0.0623964	0.937698	-0.0928047	3	0.0122207	0.145427	0.837356	0.0124488	FALSE
SPAC10F6.14c	YES-VPA5	1.00318	0.00457788	0.981579	-0.0268234	0.997821	-0.00314648	0.97701	-0.0335548	3	0.774543	0.82641	0.0828043	0.0156352	FALSE
SPAC10F6.14c	YESphlox-Act0.1	1.05527	0.0776058	1.01514	0.0216763	1.02272	0.0324134	0.988838	-0.0161935	4	0.196903	0.551428	0.258511	0.0643724	FALSE
SPAC10F6.14c	YESphlox-Act1	1.07768	0.107923	1.0367	0.0519935	1.06625	0.0925456	1.03092	0.0439388	4	0.0365456	0.249554	0.602835	0.043093	FALSE
SPAC10F6.14c	YESphlox-Act2	1.08287	0.114857	1.04169	0.0589278	1.07169	0.0998812	1.03618	0.0512744	3	0.11677	0.811084	0.0909342	0.0529004	FALSE
SPAC10F6.14c	YESphlox-Aged7	0.999763	-0.000342529	0.961746	-0.056272	0.993629	-0.00922035	0.96071	-0.0578272	6	0.983669	0.99197	0.00350138	0.0232356	FALSE
SPAC10F6.14c	YESphlox-Benza12	0.977403	-0.0329746	0.940237	-0.0889041	0.977936	-0.0321884	0.945536	-0.0807952	3	0.0365639	0.161829	0.790944	0.0106172	FALSE
SPAC10F6.14c	YESphlox-Benza4	0.998885	-0.0016088	0.960902	-0.0575383	0.989139	-0.0157548	0.956368	-0.0643616	3	0.924789	0.986798	0.00577153	0.0159192	FALSE
SPAC10F6.14c	YESphlox-Benza8	1.00332	0.00477879	0.965166	-0.0511507	0.997857	-0.00309437	0.964798	-0.0517012	3	0.577941	0.738902	0.131413	0.00388396	FALSE
SPAC10F6.14c	YESphlox-Bort500	1.10279	0.141156	1.06085	0.0852261	1.05964	0.0835705	1.02453	0.0349637	3	0.178216	0.26131	0.582844	0.0843941	FALSE
SPAC10F6.14c	YESphlox-CdCl1	0.925779	-0.11126	0.890576	-0.16719	0.921092	-0.118583	0.890576	-0.16719	1					FALSE
SPAC10F6.14c	YESphlox-Diamide2	1.04473	0.0631294	1.005	0.00719983	1.03493	0.0495376	1.00065	0.000930785	3	0.00013626	0.00407075	2.39033	0.00811299	FALSE
SPAC10F6.14c	YESphlox-Diamide3	1.03357	0.0476389	0.99427	-0.0082906	1.02834	0.0403162	0.99427	-0.0082906	2	0.0281986	0.396439	0.401824	0.00863836	FALSE
SPAC10F6.14c	YESphlox-Diamide3.5	1.17396	0.231381	1.12932	0.175452	1.1256	0.170696	1.08831	0.122089	3	0.0901103	0.16625	0.779238	0.0942435	FALSE
SPAC10F6.14c	YESphlox-EDTA4	0.971656	-0.0414829	0.934708	-0.0974124	0.959599	-0.0594966	0.927807	-0.108103	3	0.500133	0.639207	0.194359	0.0576999	FALSE
SPAC10F6.14c	YESphlox-EGTA1	1.00687	0.00987383	0.968581	-0.0460557	0.999028	-0.00140367	0.965929	-0.0500105	3	0.30533	0.553992	0.256496	0.00597248	FALSE
SPAC10F6.14c	YESphlox-EGTA10	0.884357	-0.177299	0.850729	-0.233229	0.845489	-0.242142	0.817478	-0.290748	3	0.106421	0.314681	0.50213	0.0693648	FALSE
SPAC10F6.14c	YESphlox-EGTA15	0.977245	-0.0332082	0.940084	-0.0891377	0.972297	-0.0405309	0.940084	-0.0891377	2	0.598008	0.868803	0.0610785	0.0424992	FALSE
SPAC10F6.14c	YESphlox-EGTA5	1.00089	0.0012825	0.96283	-0.054647	0.993313	-0.00967996	0.960404	-0.0582868	3	0.96481	0.977074	0.0100725	0.0289641	FALSE
SPAC10F6.14c	YESphlox-EtOH0.1	1.06402	0.0895315	1.02356	0.033602	1.06057	0.0848407	1.02543	0.0362339	4	0.0053016	0.16672	0.778013	0.0220391	FALSE
SPAC10F6.14c	YESphlox-EtOH10	0.892603	-0.16391	0.858661	-0.219839	0.837654	-0.255574	0.809902	-0.304181	4	0.175004	0.586314	0.231869	0.116868	FALSE
SPAC10F6.14c	YESphlox-Forma2.5	1.01945	0.0277958	0.980688	-0.0281337	1.00727	0.0104451	0.973895	-0.0381617	3	0.182387	0.330231	0.481183	0.0169679	FALSE
SPAC10F6.14c	YESphlox-Gluc0.1Aged7	1.04763	0.0671225	1.00779	0.011193	1.04352	0.061455	1.00895	0.0128482	5	0.000433303	0.00414238	2.38275	0.015594	FALSE
SPAC10F6.14c	YESphlox-Gluc0.5Aged7	1.01672	0.0239221	0.978058	-0.0320074	1.01529	0.0218972	0.981657	-0.0267096	12	0.0390073	0.0680492	1.16718	0.0186316	FALSE
SPAC10F6.14c	YESphlox-Gluc1Aged7	1.02521	0.0359161	0.986224	-0.0200135	1.01551	0.0222054	0.981866	-0.0264014	6	0.0193821	0.0698233	1.156	0.0176682	FALSE
SPAC10F6.14c	YESphlox-Glycerol2	0.984775	-0.0221346	0.947328	-0.0780641	0.980421	-0.028527	0.947939	-0.0771338	3	0.270028	0.787032	0.104007	0.0169041	FALSE
SPAC10F6.14c	YESphlox-Glycerol2MMS0.0075	1.02035	0.0290676	0.981553	-0.0268619	1.01029	0.0147641	0.976815	-0.0338427	3	0.151291	0.215007	0.667547	0.016087	FALSE
SPAC10F6.14c	YESphlox-Glycerol3	0.990692	-0.0134916	0.95302	-0.0694211	0.98582	-0.0206043	0.953159	-0.0692112	3	0.136973	0.466518	0.331132	0.0045929	FALSE
SPAC10F6.14c	YESphlox-Glycerol3MMS0.005	1.02045	0.0291985	0.981642	-0.026731	1.02493	0.0355213	0.990971	-0.0130855	3	0.207401	0.298316	0.525324	0.0191996	FALSE
SPAC10F6.14c	YESphlox-HP10	1.03051	0.0433607	0.991326	-0.0125688	1.00576	0.00828126	0.972435	-0.0403256	5	0.154197	0.379929	0.420298	0.0370751	FALSE
SPAC10F6.14c	YESphlox-HP15	1.17375	0.231122	1.12912	0.175193	1.06052	0.0847657	1.02538	0.0361589	3	0.342864	0.507839	0.294274	0.234832	FALSE
SPAC10F6.14c	YESphlox-HP2	1.02302	0.0328283	0.984115	-0.0231013	1.01339	0.0191912	0.979817	-0.0294156	6	0.0195946	0.280887	0.551468	0.0158805	FALSE
SPAC10F6.14c	YESphlox-HP4	1.03227	0.0458141	0.993013	-0.0101154	1.01691	0.0241887	0.983217	-0.0244182	9	0.0660173	0.282351	0.549211	0.0424863	FALSE
SPAC10F6.14c	YESphlox-HP6	1.03252	0.0461766	0.993263	-0.00975289	1.03642	0.0516018	1.00208	0.00299502	8	0.0271743	0.162367	0.789503	0.0311432	FALSE
SPAC10F6.14c	YESphlox-HP8	1.04539	0.06404	1.00564	0.00811046	1.052	0.073136	1.01715	0.0245292	8	0.0321822	0.194928	0.710126	0.0459747	FALSE
SPAC10F6.14c	YESphlox-HU8	1.0648	0.0905806	1.02431	0.0346511	1.06172	0.0864054	1.02655	0.0377986	3	0.00116123	0.00792955	2.10075	0.0123474	TRUE
SPAC10F6.14c	YESphlox-HU8MMS0.075	1.07078	0.0986652	1.03007	0.0427357	1.05026	0.0707456	1.01546	0.0221388	3	0.0614964	0.267279	0.573035	0.0331768	FALSE
SPAC10F6.14c	YESphlox-KCl0.5	1.01417	0.0203028	0.975608	-0.0356267	1.01351	0.0193643	0.979935	-0.0292425	3	0.350681	0.523829	0.28081	0.0193577	FALSE
SPAC10F6.14c	YESphlox-KCl0.5SDS0.004	1.03399	0.0482175	0.994669	-0.007712	1.02672	0.0380426	0.992704	-0.0105642	3	5.0653e-06	0.000131698	3.88042	0.00466996	FALSE
SPAC10F6.14c	YESphlox-KCl1	1.02659	0.0378616	0.987554	-0.0180679	1.01403	0.0201027	0.980436	-0.0285041	3	0.0566164	0.561491	0.250657	0.0140018	FALSE
SPAC10F6.14c	YESphlox-LiCl4	0.998917	-0.00156346	0.960933	-0.057493	0.998101	-0.00274203	0.965034	-0.0513489	3	0.924767	0.952669	0.0210579	0.0153664	FALSE
SPAC10F6.14c	YESphlox-LiCl6	1.00928	0.0133205	0.970898	-0.042609	1.01089	0.015625	0.977398	-0.0329818	3	0.689081	0.749201	0.125402	0.0328389	FALSE
SPAC10F6.14c	YESphlox-MMS0.005	1.01657	0.0237048	0.977911	-0.0322247	1.00608	0.00874982	0.972751	-0.039857	3	0.2369	0.356094	0.448435	0.0168691	FALSE
SPAC10F6.14c	YESphlox-MMS0.075	1.03128	0.0444406	0.992068	-0.0114889	1.02311	0.0329608	0.989214	-0.015646	6	0.0734135	0.100262	0.998864	0.0322955	FALSE
SPAC10F6.14c	YESphlox-NaCl150	1.00541	0.00778983	0.967183	-0.0481397	0.996664	-0.00482048	0.963644	-0.0534273	3	0.564468	0.753182	0.1231	0.0115286	FALSE
SPAC10F6.14c	YESphlox-NaCl150MMS0.005	1.03594	0.0509459	0.996552	-0.00498361	1.03139	0.0445882	0.997218	-0.00401859	3	0.0438396	0.132629	0.877363	0.0166584	FALSE
SPAC10F6.14c	YESphlox-Ovana0.5	1.00458	0.00658593	0.966376	-0.0493436	0.988275	-0.017015	0.955533	-0.0656219	3	0.77259	0.850917	0.070113	0.0221152	FALSE
SPAC10F6.14c	YESphlox-Ovana1	1.00427	0.00614156	0.966078	-0.049788	1.00385	0.00554985	0.970596	-0.043057	3	0.715382	0.785247	0.104994	0.0155578	FALSE
SPAC10F6.14c	YESphlox-Ovana4	1.06331	0.0885679	1.02288	0.0326384	1.11017	0.150776	1.07339	0.102169	3	0.352838	0.619796	0.207751	0.0879173	FALSE
SPAC10F6.14c	YESphlox-Phloxine2	1.02671	0.0380219	0.987664	-0.0179076	1.01881	0.0268793	0.985052	-0.0217276	3	0.0100987	0.104939	0.979064	0.00927569	FALSE
SPAC10F6.14c	YESphlox-Phloxine2HP10	1.02672	0.038045	0.98768	-0.0178845	1.03427	0.0486068	1	0	3	0.553973	0.661998	0.179143	0.0629788	FALSE
SPAC10F6.14c	YESphlox-Phloxine2HP15	1.03671	0.0520153	0.997291	-0.00391418	1.0196	0.0280081	0.985823	-0.0205988	3	0.549563	0.65346	0.184781	0.0855933	FALSE
SPAC10F6.14c	YESphlox-SDS0.004	1.0162	0.0231806	0.977556	-0.0327489	1.00683	0.00982185	0.973474	-0.038785	3	0.0782469	0.447274	0.349426	0.00949159	FALSE
SPAC10F6.14c	YESphlox-TBH1	0.975089	-0.0363941	0.938011	-0.0923236	0.982139	-0.0260002	0.949601	-0.074607	3	0.198921	0.3075	0.512155	0.0227208	FALSE
SPAC10F6.14c	YESphlox-TBH1.5	0.994965	-0.00728269	0.957131	-0.0632122	0.989927	-0.0146054	0.957131	-0.0632122	2	0.950733	0.967125	0.0145174	0.0882707	FALSE
SPAC10F6.14c	YESphlox-TSA1000	0.961362	-0.0568481	0.924806	-0.112778	0.953642	-0.0684804	0.922047	-0.117087	3	0.00379263	0.0431638	1.36488	0.0105813	FALSE
SPAC10F6.14c	YESphlox-TSA500	0.956037	-0.0648609	0.919684	-0.12079	0.945905	-0.0802328	0.914567	-0.12884	3	0.00244585	0.0323395	1.49027	0.0108478	TRUE
SPAC10F6.14c	YESphlox-TeaTree1	1.04044	0.0571943	1.00088	0.00126476	1.03427	0.0486068	1	0	3	1.06416e-09	8.44231e-08	7.07354	0.00151909	FALSE
SPAC10F6.14c	YESphlox-TeaTree10	1.02896	0.0411879	0.989834	-0.0147416	1.02855	0.040611	0.994473	-0.00799581	3	0.0248804	0.146517	0.834113	0.0120253	FALSE
SPAC10F6.14c	YESphlox-TeaTree100	0.92752	-0.108549	0.892251	-0.164479	0.943585	-0.0837753	0.912324	-0.132382	3	0.0829636	0.526442	0.278649	0.0389518	FALSE
SPAC10F6.14c	YESphlox-Temp25	1.01408	0.0201676	0.975516	-0.035762	1.02555	0.0363947	0.991571	-0.0122121	3	0.579341	0.837329	0.0771038	0.0353591	FALSE
SPAC10F6.14c	YESphlox-Temp25Gluc0.1	1.03435	0.0487251	0.995019	-0.00720443	1.03253	0.0461882	0.998325	-0.00241866	6	0.0016892	0.0120874	1.91767	0.0160214	FALSE
SPAC10F6.14c	YESphlox-Temp25Gluc0.5	1.02426	0.0345813	0.985311	-0.0213483	1.02473	0.0352421	0.990779	-0.0133647	6	0.0064038	0.0340113	1.46838	0.0132607	FALSE
SPAC10F6.14c	YESphlox-Temp25Gluc1	1.02692	0.03833	0.987875	-0.0175995	1.02249	0.0320904	0.988617	-0.0165164	6	0.000667235	0.0088594	2.0526	0.0103254	FALSE
SPAC10F6.14c	YESphlox-Temp25Gluc3	1.0004	0.000584129	0.962364	-0.0553454	1.01574	0.0225348	0.982091	-0.026072	3	0.986329	0.995971	0.00175317	0.0342293	FALSE
SPAC10F6.14c	YESphlox-Tuni20	0.769822	-0.377402	0.74055	-0.433332	0.765925	-0.384725	0.74055	-0.433332	2	0.107231	0.476994	0.321487	0.0557981	FALSE
SPAC10F6.14c	YESphlox-Tuni40	0.924661	-0.113003	0.8895	-0.168933	0.91998	-0.120326	0.8895	-0.168933	1					FALSE
SPAC10F6.14c	YESphlox-Tuni60	0.747798	-0.41928	0.719363	-0.475209	0.744012	-0.426602	0.719363	-0.475209	1					FALSE
SPAC10F6.14c	YESphlox-Tuni80	1.07594	0.105592	1.03502	0.0496621	1.07049	0.0982689	1.03502	0.0496621	2	0.355289	0.675055	0.170661	0.0651027	FALSE
SPAC10F6.14c	YESphlox-VPA10	1.01791	0.0256144	0.979206	-0.0303151	1.03427	0.0486068	1	0	3	0.668013	0.745091	0.127791	0.0596762	FALSE
SPAC10F6.14c	YESphlox-VPA8	1.02891	0.0411215	0.989788	-0.014808	1.02046	0.0292133	0.986647	-0.0193935	3	0.0059301	0.0522727	1.28173	0.00905915	FALSE
SPAC10F6.14c	YESphlox-Xylose2	0.938985	-0.0908265	0.903279	-0.146756	0.934231	-0.0981492	0.903279	-0.146756	2	0.051568	0.276533	0.558253	0.0139602	FALSE
SPAC10F6.14c	Yesphlox-Caffeine10	0.995904	-0.00592147	0.958034	-0.061851	1.03258	0.0462578	0.998373	-0.00234904	4	0.949576	0.997472	0.00109915	0.114442	FALSE
SPAC10F6.14c	Yesphlox-DMSO	1.03866	0.0547269	0.999167	-0.00120257	1.03024	0.0429851	0.996111	-0.00562177	4	0.0838913	0.424354	0.372272	0.03009	FALSE
SPAC10F6.14c	Yesphlox-Gal2	1.03285	0.0466267	0.993573	-0.00930278	1.03788	0.0536327	1.00349	0.00502592	4	0.0737482	0.481627	0.317289	0.0244976	FALSE
SPAC10F6.14c	Yesphlox-Rapa1	1.06284	0.0879311	1.02243	0.0320016	1.05336	0.0750028	1.01846	0.0263959	4	0.23686	0.708712	0.14953	0.081977	FALSE
SPAC10F6.14c	Yesphlox-Rapa100	1.06508	0.090958	1.02458	0.0350285	1.03329	0.0472434	0.999055	-0.00136342	3	0.258709	0.783465	0.10598	0.0696654	FALSE
SPAC10F6.14c	Yesphlox-Sorb1.2	1.05837	0.0818473	1.01813	0.0259178	1.03427	0.0486068	1	0	3	0.142187	0.574399	0.240787	0.0422308	FALSE
SPAC10F6.14c	Yesphlox-Torin5	1.10154	0.13952	1.05965	0.0835904	1.07854	0.109084	1.04281	0.0604773	4	0.0817037	0.415472	0.381458	0.076229	FALSE
SPAC11E3.12	EMM-3AT4	0.96858	-0.0460571	1.05747	0.0806235	0.998389	-0.00232641	1.07543	0.104909	3	0.564506	0.750573	0.124607	0.0789515	FALSE
SPAC11E3.12	EMM-3AT6	0.981322	-0.0272019	1.07139	0.0994787	0.998731	-0.00183252	1.07579	0.105403	3	0.572646	0.717113	0.144412	0.0311011	FALSE
SPAC11E3.12	EMM-Bleo200	1.00929	0.0133421	1.10192	0.140023	1.01957	0.0279638	1.09824	0.135199	3	0.760369	0.814925	0.0888824	0.0209951	FALSE
SPAC11E3.12	EMM-Canav60	1.02754	0.0391933	1.12185	0.165874	1.02165	0.0308995	1.10048	0.138135	3	0.531277	0.702467	0.153374	0.0582135	FALSE
SPAC11E3.12	EMM-Cys	0.987176	-0.0186207	1.07778	0.10806	0.978214	-0.0317784	1.05369	0.0754573	6	0.810111	0.948949	0.022757	0.117228	FALSE
SPAC11E3.12	EMM-Met	0.945835	-0.080339	1.03264	0.0463416	0.95737	-0.062851	1.03124	0.0443847	5	0.105527	0.89438	0.0484777	0.036315	FALSE
SPAC11E3.12	EMMphlox-Act0.1	0.974531	-0.0372199	1.04158	0.0587788	0.972762	-0.0398418	1.04393	0.0620212	4	0.0169078	0.233112	0.632436	0.0114679	FALSE
SPAC11E3.12	EMMphlox-Act1	0.958535	-0.0610966	1.02449	0.0349021	0.959677	-0.0593786	1.02989	0.0424843	3	0.00464652	0.381468	0.418542	0.0129209	FALSE
SPAC11E3.12	EMMphlox-Act2	1.06804	0.0949619	1.14152	0.190961	1.05667	0.0795255	1.13397	0.181388	4	0.241097	0.860286	0.065357	0.0996998	FALSE
SPAC11E3.12	EMMphlox-Cana75	0.972987	-0.039507	1.03993	0.0564917	0.973706	-0.0384415	1.04494	0.0634215	6	0.0449268	0.170437	0.768437	0.0245079	FALSE
SPAC11E3.12	EMMphlox-EtOH0.1	0.977309	-0.033113	1.04455	0.0628857	0.98231	-0.0257502	1.05417	0.0761127	3	0.43047	0.724523	0.139948	0.0424873	FALSE
SPAC11E3.12	YES-Bleo200	0.984297	-0.022835	1.02873	0.0408667	1.02069	0.029539	1.06754	0.0942904	3	0.75159	0.880539	0.0552513	0.0777201	FALSE
SPAC11E3.12	YES-Bleo300	0.973434	-0.0388449	1.01738	0.0248568	0.972726	-0.0398946	1.01738	0.0248568	1					FALSE
SPAC11E3.12	YES-Bleo600	0.998629	-0.00198001	1.04371	0.0617216	0.997902	-0.00302979	1.04371	0.0617216	2	0.922704	0.985963	0.00613954	0.0148573	FALSE
SPAC11E3.12	YES-Bortezomib100	1.01648	0.0235857	1.06237	0.0872874	1.01267	0.0181667	1.05916	0.0829181	3	0.0972726	0.18229	0.739236	0.00897308	FALSE
SPAC11E3.12	YES-Bortezomib200	1.02066	0.0295041	1.06674	0.0932057	1.02453	0.0349687	1.07157	0.0997201	3	0.250167	0.341657	0.46641	0.0234447	FALSE
SPAC11E3.12	YES-Bref60	1.07271	0.101262	1.12114	0.164964	1.10822	0.148243	1.15909	0.212995	3	0.418791	0.533432	0.272921	0.130256	FALSE
SPAC11E3.12	YES-Calco10KCl0.5	1.07332	0.102075	1.12177	0.165777	1.09155	0.126377	1.14166	0.191128	3	0.0559916	0.156628	0.80513	0.037801	FALSE
SPAC11E3.12	YES-Calco2	0.985296	-0.0213706	1.02978	0.0423311	0.983145	-0.0245234	1.02828	0.0402281	3	0.716248	0.929956	0.0315374	0.0628129	FALSE
SPAC11E3.12	YES-Calco4KCl0.5	1.00007	0.000107652	1.04522	0.0638093	1.0065	0.00934238	1.0527	0.0740938	3	0.997074	0.997074	0.00127264	0.0306428	FALSE
SPAC11E3.12	YES-Cana120	0.961455	-0.0567082	1.00486	0.00699349	0.961408	-0.0567794	1.00554	0.00797205	3	0.000426513	0.0127421	1.89476	0.00838955	FALSE
SPAC11E3.12	YES-Cana60	0.960413	-0.0582738	1.00377	0.00542782	0.961706	-0.0563326	1.00585	0.00841878	3	0.000204523	0.00376008	2.4248	0.00771778	FALSE
SPAC11E3.12	YES-CoCl0.25	0.984317	-0.0228054	1.02875	0.0408963	0.979152	-0.0303958	1.0241	0.0343557	3	0.318228	0.585404	0.232544	0.0206321	FALSE
SPAC11E3.12	YES-CoCl5	1.01194	0.0171179	1.05762	0.0808195	1.01802	0.0257729	1.06476	0.0905244	3	0.583649	0.719032	0.143252	0.032002	FALSE
SPAC11E3.12	YES-Cycloh100	0.98978	-0.0148199	1.03446	0.0488817	0.986095	-0.0202013	1.03136	0.0445501	3	0.44763	0.815033	0.0888247	0.0173706	FALSE
SPAC11E3.12	YES-Cycloh200	1.03162	0.0449146	1.07819	0.108616	1.03558	0.0504384	1.08312	0.11519	3	0.0270514	0.431019	0.365504	0.0148377	FALSE
SPAC11E3.12	YES-Cycloh400	1.01466	0.0210024	1.06047	0.084704	1.02242	0.0319918	1.06936	0.0967432	3	0.418199	0.792418	0.101046	0.0251014	FALSE
SPAC11E3.12	YES-Cycloh600	0.972558	-0.0401439	1.01646	0.0235577	0.965012	-0.0513809	1.00931	0.0133705	3	0.181694	0.538268	0.269001	0.0259373	FALSE
SPAC11E3.12	YES-Dhcumarin100	0.949943	-0.0740872	0.992827	-0.0103855	0.960132	-0.0586959	1.00421	0.00605555	3	0.0538865	0.328846	0.483008	0.0271898	FALSE
SPAC11E3.12	YES-Dhcumarin200	1.00199	0.00286334	1.04722	0.066565	1.00056	0.000805115	1.04649	0.0655565	3	0.811414	0.935307	0.0290459	0.00338571	FALSE
SPAC11E3.12	YES-Dhcumarin50	0.998043	-0.00282648	1.0431	0.0608752	0.995653	-0.00628434	1.04136	0.0584671	3	0.84131	0.918494	0.0369236	0.00954599	FALSE
SPAC11E3.12	YES-EDTA0.1	1.00747	0.0107352	1.05295	0.0744369	1.02755	0.039205	1.07472	0.103956	3	0.791416	0.875687	0.0576511	0.0435542	FALSE
SPAC11E3.12	YES-EDTA0.3	1.00091	0.00131068	1.04609	0.0650123	0.994758	-0.00758288	1.04042	0.0571685	3	0.942029	0.962158	0.0167535	0.0161405	FALSE
SPAC11E3.12	YES-EDTA0.6	1.03031	0.043085	1.07683	0.106787	1.04087	0.0577848	1.08865	0.122536	3	0.123285	0.260151	0.584774	0.0236268	FALSE
SPAC11E3.12	YES-EtOH5	1.00906	0.0130123	1.05461	0.0767139	1.00856	0.0122936	1.05486	0.077045	3	0.562985	0.708176	0.149859	0.0216853	FALSE
SPAC11E3.12	YES-Forma2	1.00992	0.0142481	1.05552	0.0779498	0.997562	-0.00352171	1.04335	0.0612297	3	0.666843	0.741281	0.130017	0.0345158	FALSE
SPAC11E3.12	YES-Forma3	1.01913	0.0273355	1.06514	0.0910371	1.00229	0.00330546	1.0483	0.0680569	3	0.459044	0.589287	0.229673	0.0373742	FALSE
SPAC11E3.12	YES-HU30	0.917715	-0.123881	0.959145	-0.0601798	0.915014	-0.128135	0.957017	-0.0633836	3	6.47575e-09	2.21101e-07	6.65541	0.0081475	TRUE
SPAC11E3.12	YES-HU45	0.960997	-0.0573956	1.00438	0.00630608	0.952442	-0.0702966	0.996164	-0.00554523	3	0.424476	0.630123	0.200574	0.0707772	FALSE
SPAC11E3.12	YES-KCl0.5SDS0.01	0.999688	-0.000449697	1.04482	0.0632519	0.999285	-0.00103167	1.04516	0.0637198	3	0.969583	0.979448	0.00901868	0.001837	FALSE
SPAC11E3.12	YES-KCl1SDS0.01	0.992556	-0.0107795	1.03736	0.0529222	0.971178	-0.0421923	1.01576	0.0225591	3	0.80002	0.850021	0.0705703	0.0454615	FALSE
SPAC11E3.12	YES-Ovana6	1.02296	0.0327455	1.06914	0.0964471	1.02221	0.0316957	1.06914	0.0964471	2	0.500518	0.696875	0.156845	0.0348861	FALSE
SPAC11E3.12	YES-SDS0.01	1.0031	0.0044594	1.04838	0.068161	1.01546	0.0221344	1.06208	0.0868858	4	0.91438	0.982161	0.00781737	0.0535817	FALSE
SPAC11E3.12	YES-SDS0.02	1.03751	0.05312	1.08434	0.116822	1.02754	0.039194	1.07471	0.103945	3	0.0691252	0.181583	0.740926	0.0230272	FALSE
SPAC11E3.12	YES-TBH15	1.01055	0.0151364	1.05617	0.078838	1.00981	0.0140866	1.05617	0.078838	1					FALSE
SPAC11E3.12	YES-UV1000	0.903143	-0.146974	0.943914	-0.0832724	0.92708	-0.109234	0.969638	-0.0444823	3	0.13142	0.908841	0.0415119	0.0724571	FALSE
SPAC11E3.12	YES-UV10m	0.95873	-0.0608036	1.00201	0.00289806	0.957286	-0.0629787	1.00123	0.00177275	3	0.0188457	0.208974	0.679909	0.0175499	FALSE
SPAC11E3.12	YES-UV2000	0.986382	-0.0197819	1.03091	0.0439198	1.00886	0.012721	1.05517	0.0774724	3	0.755405	0.84381	0.0737551	0.0683427	FALSE
SPAC11E3.12	YES-UV20m	0.974876	-0.0367093	1.01889	0.0269923	0.969474	-0.0447259	1.01398	0.0200255	3	0.174508	0.300053	0.522801	0.0231735	FALSE
SPAC11E3.12	YES-UV3000	0.994823	-0.00748846	1.03973	0.0562132	0.998538	-0.00211015	1.04438	0.0626413	3	0.83315	0.984269	0.00688616	0.037627	FALSE
SPAC11E3.12	YES-UV4000	0.968213	-0.0466038	1.01192	0.0170979	0.967509	-0.0476535	1.01192	0.0170979	2	0.137329	0.54191	0.266073	0.0168601	FALSE
SPAC11E3.12	YES-UV5m	0.991694	-0.0120328	1.03646	0.0516689	0.993821	-0.00894229	1.03944	0.0558091	3	0.377484	0.728787	0.137399	0.00814707	FALSE
SPAC11E3.12	YES-UV6000	1.0678	0.0946456	1.11601	0.158347	1.08262	0.114526	1.13232	0.179278	3	0.32121	0.693765	0.158787	0.0940864	FALSE
SPAC11E3.12	YES-UV9000	1.01434	0.0205457	1.06013	0.0842474	1.01534	0.0219679	1.06195	0.0867193	3	0.128176	0.39618	0.402108	0.0077172	FALSE
SPAC11E3.12	YES-VPA5	1.02977	0.0423247	1.07626	0.106026	1.03486	0.0494418	1.08237	0.114193	3	0.32019	0.422792	0.373873	0.0412507	FALSE
SPAC11E3.12	YESphlox-Act0.1	1.00086	0.00123583	1.04482	0.0632608	0.996592	-0.00492526	1.03277	0.0465133	4	0.968572	0.999555	0.000193251	0.0411188	FALSE
SPAC11E3.12	YESphlox-Act1	1.02364	0.0337026	1.0686	0.0957276	1.03059	0.0434641	1.06799	0.0949026	4	0.47784	0.787612	0.103687	0.0606846	FALSE
SPAC11E3.12	YESphlox-Act2	1.04393	0.0620209	1.08979	0.124046	1.00085	0.00123188	1.03718	0.0526704	3	0.496454	0.900875	0.0453353	0.0962927	FALSE
SPAC11E3.12	YESphlox-Aged7	1.0173	0.0247422	1.06199	0.0867672	1.02064	0.0294776	1.05769	0.0809161	6	0.0569764	0.29305	0.533058	0.0171902	FALSE
SPAC11E3.12	YESphlox-Benza12	1.01522	0.0217987	1.05982	0.0838237	1.02074	0.0296097	1.05779	0.0810483	3	0.0384505	0.164101	0.784888	0.00777547	FALSE
SPAC11E3.12	YESphlox-Benza4	1.03353	0.0475749	1.07893	0.1096	1.02089	0.0298258	1.05794	0.0812643	3	0.278823	0.812489	0.0901827	0.0414065	FALSE
SPAC11E3.12	YESphlox-Benza8	1.00934	0.0134051	1.05368	0.0754302	1.01948	0.0278284	1.05648	0.079267	3	0.101146	0.324718	0.488493	0.00550212	FALSE
SPAC11E3.12	YESphlox-Bort500	1.09595	0.132184	1.1441	0.194209	1.09174	0.126636	1.13137	0.178074	3	0.0480645	0.117218	0.931004	0.0414911	FALSE
SPAC11E3.12	YESphlox-CdCl1	0.999609	-0.000563896	1.04352	0.0614611	1.00697	0.0100226	1.04352	0.0614611	2	0.973711	0.980473	0.00856434	0.0134792	FALSE
SPAC11E3.12	YESphlox-Diamide2	0.986551	-0.0195346	1.02989	0.0424904	0.965727	-0.0503131	1.00078	0.0011255	3	0.726641	0.862085	0.0644498	0.0602606	FALSE
SPAC11E3.12	YESphlox-Diamide3	1.02808	0.0399559	1.07325	0.101981	1.03565	0.0505424	1.07325	0.101981	2	0.202801	0.706209	0.151067	0.0164527	FALSE
SPAC11E3.12	YESphlox-Diamide3.5	0.952068	-0.0708629	0.993893	-0.00883792	0.970399	-0.0433505	1.00562	0.00808809	3	0.0595446	0.123231	0.909278	0.0246351	FALSE
SPAC11E3.12	YESphlox-EDTA4	1.04772	0.0672553	1.09375	0.12928	1.10974	0.150215	1.15002	0.201654	3	0.643391	0.780561	0.107593	0.159768	FALSE
SPAC11E3.12	YESphlox-EGTA1	1.00781	0.0112289	1.05209	0.0732539	1.00936	0.0134398	1.046	0.0648783	3	0.40735	0.6047	0.21846	0.0129033	FALSE
SPAC11E3.12	YESphlox-EGTA10	0.98915	-0.0157384	1.0326	0.0462866	0.961235	-0.0570384	0.996126	-0.00559982	3	0.788165	0.844715	0.07329	0.0637468	FALSE
SPAC11E3.12	YESphlox-EGTA15	1.28471	0.361444	1.34115	0.423469	1.1816	0.240743	1.22449	0.292182	3	0.213591	0.734166	0.134206	0.286003	FALSE
SPAC11E3.12	YESphlox-EGTA5	1.01779	0.0254423	1.0625	0.0874673	1.02933	0.0417059	1.06669	0.0931444	3	0.150381	0.442013	0.354565	0.0151893	FALSE
SPAC11E3.12	YESphlox-EtOH0.1	1.02035	0.0290672	1.06518	0.0910922	1.02059	0.0294091	1.05764	0.0808476	4	0.0823821	0.418984	0.377803	0.0172334	FALSE
SPAC11E3.12	YESphlox-EtOH10	1.00911	0.0130904	1.05345	0.0751154	1.01702	0.0243454	1.05393	0.0757839	4	0.613562	0.820611	0.0858624	0.03312	FALSE
SPAC11E3.12	YESphlox-Forma2.5	0.981994	-0.0262139	1.02513	0.0358111	0.991445	-0.0123949	1.02743	0.0390437	3	0.203983	0.35847	0.445547	0.0181481	FALSE
SPAC11E3.12	YESphlox-Gluc0.1Aged7	1.00184	0.00265534	1.04585	0.0646803	0.983527	-0.0239641	1.01923	0.0274745	5	0.937354	0.95358	0.0206429	0.050608	FALSE
SPAC11E3.12	YESphlox-Gluc0.5Aged7	0.989746	-0.0148699	1.03323	0.0471551	1.00159	0.00228873	1.03794	0.0537273	12	0.079324	0.125553	0.901175	0.0130395	FALSE
SPAC11E3.12	YESphlox-Gluc1Aged7	1.00377	0.00543448	1.04787	0.0674595	1.00741	0.010657	1.04398	0.0620955	6	0.805363	0.912235	0.0398931	0.0357264	FALSE
SPAC11E3.12	YESphlox-Glycerol2	1.01781	0.0254634	1.06252	0.0874884	1.02529	0.0360364	1.06251	0.0874749	3	0.0730104	0.673835	0.171446	0.0112577	FALSE
SPAC11E3.12	YESphlox-Glycerol2MMS0.0075	1.04036	0.0570892	1.08607	0.119114	1.07911	0.109845	1.11828	0.161284	3	0.3852	0.463462	0.333986	0.0662072	FALSE
SPAC11E3.12	YESphlox-Glycerol3	0.996746	-0.00470149	1.04053	0.0573235	1.00249	0.00359435	1.03888	0.0550329	3	0.708958	0.868928	0.061016	0.0122958	FALSE
SPAC11E3.12	YESphlox-Glycerol3MMS0.005	1.00799	0.0114818	1.05227	0.0735068	1.01574	0.0225308	1.05261	0.0739693	3	0.600472	0.670621	0.173523	0.0228812	FALSE
SPAC11E3.12	YESphlox-HP10	0.923337	-0.11507	0.9639	-0.0530451	0.904254	-0.145201	0.937076	-0.0937621	5	0.250009	0.483843	0.315296	0.132977	FALSE
SPAC11E3.12	YESphlox-HP15	0.632163	-0.661631	0.659934	-0.599606	0.65533	-0.609707	0.679117	-0.558269	3	0.00811103	0.121158	0.916646	0.0632191	FALSE
SPAC11E3.12	YESphlox-HP2	0.987105	-0.018725	1.03047	0.0433	0.998333	-0.00240662	1.03457	0.0490319	6	0.211188	0.636582	0.196145	0.0214801	FALSE
SPAC11E3.12	YESphlox-HP4	1.04503	0.0635511	1.09094	0.125576	1.02056	0.029361	1.0576	0.0807996	9	0.159321	0.375754	0.425096	0.0902513	FALSE
SPAC11E3.12	YESphlox-HP6	1.04915	0.0692149	1.09523	0.13124	1.03167	0.0449886	1.06912	0.0964271	8	0.0901645	0.28992	0.537722	0.0733992	FALSE
SPAC11E3.12	YESphlox-HP8	1.02563	0.0365117	1.07069	0.0985368	1.02179	0.0311012	1.05888	0.0825397	8	0.463264	0.608352	0.215845	0.0968664	FALSE
SPAC11E3.12	YESphlox-HU8	1.00558	0.00802328	1.04975	0.0700483	1.01066	0.0153028	1.04735	0.0667413	3	0.469434	0.571321	0.243119	0.0101405	FALSE
SPAC11E3.12	YESphlox-HU8MMS0.075	1.0836	0.115834	1.1312	0.177859	1.04287	0.0605602	1.08072	0.111999	3	0.255164	0.495806	0.304689	0.0959045	FALSE
SPAC11E3.12	YESphlox-KCl0.5	1.02147	0.0306454	1.06634	0.0926704	1.00863	0.0123921	1.04524	0.0638307	3	0.535727	0.681057	0.166816	0.0521928	FALSE
SPAC11E3.12	YESphlox-KCl0.5SDS0.004	0.999056	-0.00136273	1.04294	0.0606623	1.02653	0.0377697	1.06379	0.0892083	3	0.985088	0.993383	0.0028834	0.0807202	FALSE
SPAC11E3.12	YESphlox-KCl1	0.998916	-0.00156464	1.0428	0.0604604	0.970876	-0.042641	1.00612	0.00879753	3	0.978786	0.995447	0.00198207	0.0650432	FALSE
SPAC11E3.12	YESphlox-LiCl4	1.02435	0.0347082	1.06935	0.0967332	1.02749	0.0391279	1.06479	0.0905664	3	0.012953	0.118171	0.927489	0.00948503	FALSE
SPAC11E3.12	YESphlox-LiCl6	0.977543	-0.0327686	1.02049	0.0292565	0.971168	-0.0422077	1.00642	0.00923086	3	0.252805	0.392339	0.406338	0.0259193	FALSE
SPAC11E3.12	YESphlox-MMS0.005	1.01659	0.0237395	1.06125	0.0857645	1.02463	0.0351095	1.06183	0.086548	3	0.557797	0.675487	0.170383	0.042789	FALSE
SPAC11E3.12	YESphlox-MMS0.075	1.09528	0.131296	1.14339	0.193321	1.07638	0.106188	1.11545	0.157627	6	0.094095	0.123564	0.908107	0.118053	FALSE
SPAC11E3.12	YESphlox-NaCl150	0.991918	-0.0117075	1.03549	0.0503175	1.00399	0.00573905	1.04043	0.0571776	3	0.656448	0.817141	0.087703	0.0277452	FALSE
SPAC11E3.12	YESphlox-NaCl150MMS0.005	1.0162	0.0231871	1.06084	0.0852121	1.0279	0.0396977	1.06521	0.0911362	3	0.112926	0.223052	0.651595	0.0121518	FALSE
SPAC11E3.12	YESphlox-Ovana0.5	1.02162	0.030862	1.0665	0.092887	1.04697	0.0662224	1.08497	0.117661	3	0.367738	0.517939	0.285722	0.0338795	FALSE
SPAC11E3.12	YESphlox-Ovana1	1.02219	0.0316628	1.06709	0.0936879	1.05372	0.0754911	1.09197	0.12693	3	0.526379	0.610702	0.214171	0.0525943	FALSE
SPAC11E3.12	YESphlox-Ovana4	0.993385	-0.00957486	1.03702	0.0524502	1.0096	0.013788	1.04625	0.0652266	3	0.866528	0.915809	0.0381951	0.062525	FALSE
SPAC11E3.12	YESphlox-Phloxine2	1.00274	0.0039445	1.04679	0.0659695	1.01994	0.028483	1.05696	0.0799216	3	0.918925	0.950964	0.021836	0.0426223	FALSE
SPAC11E3.12	YESphlox-Phloxine2HP10	0.842028	-0.24806	0.879018	-0.186035	0.805357	-0.312299	0.83459	-0.26086	3	0.113704	0.288613	0.539684	0.105998	FALSE
SPAC11E3.12	YESphlox-Phloxine2HP15	0.746298	-0.422176	0.779083	-0.360151	0.709863	-0.494388	0.735629	-0.44295	3	0.0484644	0.246157	0.608788	0.105701	FALSE
SPAC11E3.12	YESphlox-SDS0.004	1.00343	0.00494657	1.04752	0.0669716	1.01016	0.0145843	1.04683	0.0660229	3	0.686107	0.910997	0.0404828	0.0118768	FALSE
SPAC11E3.12	YESphlox-TBH1	0.993506	-0.00939874	1.03715	0.0526263	1.0094	0.0134964	1.04604	0.064935	3	0.614822	0.69641	0.157135	0.0191752	FALSE
SPAC11E3.12	YESphlox-TBH1.5	0.956368	-0.0643615	0.998382	-0.00233651	0.963412	-0.0537751	0.998382	-0.00233651	2	0.0137661	0.154704	0.810497	0.00838012	FALSE
SPAC11E3.12	YESphlox-TSA1000	1.00375	0.00540105	1.04785	0.0674261	1.02358	0.0336182	1.06073	0.0850567	3	0.859879	0.901364	0.0450998	0.03337	FALSE
SPAC11E3.12	YESphlox-TSA500	1.0105	0.0150669	1.05489	0.0770919	1.00937	0.0134588	1.04601	0.0648973	3	0.663984	0.844985	0.073151	0.0372553	FALSE
SPAC11E3.12	YESphlox-TeaTree1	0.99595	-0.00585455	1.0397	0.0561705	0.982775	-0.0250674	1.01845	0.0263711	3	0.8935	0.942879	0.0255441	0.0479815	FALSE
SPAC11E3.12	YESphlox-TeaTree10	0.944921	-0.081735	0.986431	-0.01971	0.963658	-0.0534068	0.998637	-0.00196829	3	0.0478807	0.22887	0.640412	0.0254065	FALSE
SPAC11E3.12	YESphlox-TeaTree100	1.06178	0.0864866	1.10843	0.148512	1.06575	0.0918633	1.10443	0.143302	3	0.35507	0.828714	0.0815955	0.0936358	FALSE
SPAC11E3.12	YESphlox-Temp25	0.999118	-0.00127283	1.04301	0.0607522	1.00128	0.00184377	1.03762	0.0532823	3	0.950035	0.970335	0.0130782	0.021701	FALSE
SPAC11E3.12	YESphlox-Temp25Gluc0.1	0.952918	-0.0695755	0.99478	-0.0075505	0.956371	-0.064358	0.991085	-0.0129195	6	0.00117511	0.0104019	1.98289	0.0217721	FALSE
SPAC11E3.12	YESphlox-Temp25Gluc0.5	0.983665	-0.0237605	1.02688	0.0382645	0.991401	-0.01246	1.02739	0.0389785	6	0.03335	0.119947	0.92101	0.0135559	FALSE
SPAC11E3.12	YESphlox-Temp25Gluc1	0.993944	-0.00876295	1.03761	0.0532621	1.00725	0.0104165	1.04381	0.0618551	6	0.636278	0.72761	0.138101	0.0291183	FALSE
SPAC11E3.12	YESphlox-Temp25Gluc3	1.00719	0.0103396	1.05144	0.0723646	1.01827	0.0261244	1.05523	0.077563	3	0.259263	0.880614	0.0552144	0.00726786	FALSE
SPAC11E3.12	YESphlox-Tuni20	1.02766	0.0393641	1.07281	0.101389	1.00243	0.00349597	1.03881	0.0549345	3	0.589563	0.818017	0.0872378	0.0784346	FALSE
SPAC11E3.12	YESphlox-Tuni40	1.01728	0.0247206	1.06197	0.0867456	1.03909	0.055325	1.07681	0.106764	3	0.580299	0.803087	0.0952373	0.0475592	FALSE
SPAC11E3.12	YESphlox-Tuni60	1.03724	0.0527435	1.0828	0.114769	1.04487	0.06333	1.0828	0.114769	2	0.088192	0.470358	0.327572	0.0128146	FALSE
SPAC11E3.12	YESphlox-Tuni80	1.08472	0.117322	1.13237	0.179347	1.10476	0.143728	1.14486	0.195167	3	0.0953528	0.431074	0.365448	0.0520642	FALSE
SPAC11E3.12	YESphlox-VPA10	1.10073	0.138464	1.14909	0.200489	1.11521	0.15732	1.15569	0.208759	3	0.102443	0.225289	0.64726	0.0640763	FALSE
SPAC11E3.12	YESphlox-VPA8	1.00157	0.00226204	1.04557	0.0642871	1.00029	0.000415469	1.0366	0.051854	3	0.955534	0.959566	0.0179251	0.0446786	FALSE
SPAC11E3.12	YESphlox-Xylose2	1.08452	0.117056	1.13216	0.179081	1.09251	0.127643	1.13216	0.179081	2	0.349189	0.63707	0.195813	0.0766736	FALSE
SPAC11E3.12	Yesphlox-Caffeine10	0.941306	-0.0872644	0.982657	-0.0252394	0.942558	-0.0853467	0.976771	-0.0339081	4	0.537661	0.898491	0.0464864	0.176483	FALSE
SPAC11E3.12	Yesphlox-DMSO	1.03588	0.0508572	1.08139	0.112882	1.03357	0.047642	1.07109	0.0990805	4	0.292569	0.587597	0.23092	0.0586789	FALSE
SPAC11E3.12	Yesphlox-Gal2	0.995613	-0.00634315	1.03935	0.0556819	0.981365	-0.0271388	1.01699	0.0242997	4	0.884179	0.969398	0.0134978	0.0573074	FALSE
SPAC11E3.12	Yesphlox-Rapa1	1.00811	0.0116559	1.0524	0.0736809	1.00379	0.00546197	1.04023	0.0569005	4	0.709157	0.921395	0.0355542	0.0406176	FALSE
SPAC11E3.12	Yesphlox-Rapa100	1.00945	0.0135663	1.05379	0.0755913	1.02244	0.0320141	1.05955	0.0834527	3	0.648391	0.863591	0.063692	0.0317356	FALSE
SPAC11E3.12	Yesphlox-Sorb1.2	1.03136	0.0445429	1.07666	0.106568	1.04391	0.0619989	1.0818	0.113437	3	0.242251	0.57898	0.237336	0.0349121	FALSE
SPAC11E3.12	Yesphlox-Torin5	0.958223	-0.0615662	1.00032	0.000458799	0.963549	-0.0535699	0.998524	-0.00213132	4	0.565252	0.789542	0.102625	0.135205	FALSE
SPAC12G12.11c	EMM-3AT4	0.981537	-0.0268852	1.00145	0.00208331	0.982481	-0.0254979	1.00145	0.00208331	2	0.249794	0.524007	0.280663	0.0116361	FALSE
SPAC12G12.11c	EMM-3AT6	1.00068	0.000980512	1.02098	0.029949	0.996766	-0.00467395	1.016	0.0229073	3	0.960417	0.977047	0.0100845	0.00908514	FALSE
SPAC12G12.11c	EMM-Bleo200	0.960124	-0.0587067	0.979598	-0.0297382	0.962692	-0.0548534	0.981274	-0.0272722	3	0.0428379	0.14025	0.853097	0.019417	FALSE
SPAC12G12.11c	EMM-Canav60	0.937399	-0.0932654	0.956411	-0.0642969	0.942935	-0.0847691	0.961136	-0.0571878	3	0.0746527	0.301141	0.52123	0.0380391	FALSE
SPAC12G12.11c	EMM-Cys	0.975839	-0.0352856	0.995631	-0.00631707	0.972961	-0.0395467	0.99174	-0.0119654	6	0.106396	0.454083	0.342865	0.0166551	FALSE
SPAC12G12.11c	EMM-Met	0.980205	-0.0288444	1.00009	0.000124159	0.975524	-0.035751	0.994353	-0.00816973	6	0.305919	0.974361	0.0112802	0.0344487	FALSE
SPAC12G12.11c	EMMphlox-Act0.1	1.03352	0.0475679	1.02793	0.0397419	1.04014	0.0567745	1.02697	0.038398	4	0.0452439	0.332007	0.478853	0.01657	FALSE
SPAC12G12.11c	EMMphlox-Act1	1.03694	0.0523289	1.03133	0.0445029	1.04558	0.0643	1.03234	0.0459235	4	0.0250387	0.381468	0.418542	0.0145663	FALSE
SPAC12G12.11c	EMMphlox-Act2	1.02003	0.0286151	1.01451	0.0207891	1.0237	0.0337894	1.01074	0.0154129	4	0.200574	0.860286	0.065357	0.0158955	FALSE
SPAC12G12.11c	EMMphlox-Cana75	1.01131	0.0162204	1.00584	0.00839436	1.01467	0.0210049	1.00182	0.00262847	6	0.434106	0.665072	0.177131	0.0156683	FALSE
SPAC12G12.11c	EMMphlox-EtOH0.1	1.01408	0.0201654	1.00859	0.0123394	1.01981	0.0283059	1.00691	0.00992944	4	0.468656	0.767184	0.1151	0.0272907	FALSE
SPAC12G12.11c	YES-Bleo200	0.964159	-0.0526574	0.961844	-0.0561252	0.954117	-0.0677613	0.953471	-0.0687391	3	0.0335302	0.210887	0.675949	0.0145489	FALSE
SPAC12G12.11c	YES-Bleo300	0.998186	-0.00261878	0.99579	-0.00608654	0.996465	-0.00510872	0.99579	-0.00608654	1					FALSE
SPAC12G12.11c	YES-Bleo600	0.986189	-0.0200643	0.983821	-0.023532	0.984488	-0.0225542	0.983821	-0.023532	2	0.381604	0.631527	0.199608	0.0141593	FALSE
SPAC12G12.11c	YES-Bortezomib100	1.03042	0.043237	1.02795	0.0397693	1.02801	0.0398571	1.02732	0.0388793	3	0.00667643	0.0269203	1.56992	0.00892291	FALSE
SPAC12G12.11c	YES-Bortezomib200	1.01447	0.0207224	1.01203	0.0172546	1.0198	0.0282796	1.0191	0.0273018	3	0.2332	0.324627	0.488615	0.0151542	FALSE
SPAC12G12.11c	YES-Bref60	1.09856	0.135617	1.09593	0.132149	1.09422	0.129901	1.09348	0.128923	3	0.0435184	0.139749	0.85465	0.0381932	FALSE
SPAC12G12.11c	YES-Calco10KCl0.5	0.980901	-0.0278213	0.978546	-0.031289	0.995034	-0.00718235	0.99436	-0.00816017	3	0.422027	0.572065	0.242555	0.0328901	FALSE
SPAC12G12.11c	YES-Calco2	0.995162	-0.00699723	0.992772	-0.010465	0.994557	-0.00787444	0.993883	-0.00885226	3	0.529281	0.879196	0.0559142	0.0103149	FALSE
SPAC12G12.11c	YES-Calco4KCl0.5	0.990539	-0.013714	0.988161	-0.0171818	0.987498	-0.0181507	0.986829	-0.0191286	3	0.170187	0.460278	0.33698	0.00807471	FALSE
SPAC12G12.11c	YES-Cana120	0.997398	-0.0037585	0.995004	-0.00722626	0.995527	-0.0064675	0.994853	-0.00744531	3	0.585284	0.840631	0.0753948	0.004993	FALSE
SPAC12G12.11c	YES-Cana60	0.987377	-0.0183274	0.985006	-0.0217952	0.983567	-0.0239051	0.9829	-0.0248829	3	0.0540247	0.274721	0.561108	0.00685834	FALSE
SPAC12G12.11c	YES-CoCl0.25	0.993031	-0.0100895	0.990647	-0.0135573	0.982209	-0.0258975	0.981544	-0.0268753	3	0.634143	0.856003	0.0675247	0.0212768	FALSE
SPAC12G12.11c	YES-CoCl5	1.00143	0.00205708	0.999023	-0.00141068	1.00596	0.0085728	1.00528	0.00759499	3	0.929752	0.949618	0.022451	0.0243101	FALSE
SPAC12G12.11c	YES-Cycloh100	1.01051	0.0150786	1.00808	0.0116108	1.00483	0.00695354	1.00415	0.00597572	3	0.152841	0.581482	0.235464	0.00858027	FALSE
SPAC12G12.11c	YES-Cycloh200	1.01423	0.0203834	1.01179	0.0169157	1.00917	0.0131642	1.00848	0.0121863	3	0.144259	0.689433	0.161508	0.0113771	FALSE
SPAC12G12.11c	YES-Cycloh400	0.986975	-0.0189152	0.984605	-0.022383	0.985721	-0.0207481	0.985054	-0.0217259	3	0.186251	0.701019	0.15427	0.0119168	FALSE
SPAC12G12.11c	YES-Cycloh600	0.988807	-0.0162392	0.986433	-0.0197069	0.990845	-0.0132681	0.990174	-0.014246	3	0.245489	0.6256	0.203703	0.0121049	FALSE
SPAC12G12.11c	YES-Dhcumarin100	0.998017	-0.00286391	0.995621	-0.00633166	0.996296	-0.00535385	0.995621	-0.00633166	2	0.891819	0.969192	0.0135904	0.0161135	FALSE
SPAC12G12.11c	YES-Dhcumarin200	1.01955	0.027938	1.01711	0.0244702	1.00512	0.00737127	1.00444	0.00639346	3	0.473092	0.759087	0.119708	0.0384426	FALSE
SPAC12G12.11c	YES-Dhcumarin50	0.992294	-0.0111608	0.989911	-0.0146286	0.993807	-0.00896269	0.993133	-0.00994051	3	0.164469	0.575643	0.239847	0.00605215	FALSE
SPAC12G12.11c	YES-EDTA0.1	1.00168	0.00241735	0.999272	-0.0010504	0.998931	-0.0015435	0.998254	-0.00252132	3	0.672194	0.819666	0.0863633	0.00260912	FALSE
SPAC12G12.11c	YES-EDTA0.3	0.98284	-0.0249712	0.980481	-0.028439	0.988704	-0.0163892	0.988034	-0.0173671	3	0.289115	0.553275	0.257059	0.0209165	FALSE
SPAC12G12.11c	YES-EDTA0.6	0.961711	-0.0563244	0.959402	-0.0597922	0.954049	-0.0678651	0.953402	-0.0688429	3	0.0514129	0.141271	0.849946	0.0178031	FALSE
SPAC12G12.11c	YES-EtOH5	1.00107	0.00154811	0.99867	-0.00191965	1.00109	0.00157658	1.00042	0.000598762	3	0.886488	0.917189	0.0375413	0.0103928	FALSE
SPAC12G12.11c	YES-Forma2	1.04119	0.0582304	1.03869	0.0547627	1.0332	0.0471223	1.0325	0.0461445	3	0.0385254	0.0959121	1.01813	0.0170026	FALSE
SPAC12G12.11c	YES-Forma3	1.01623	0.0232215	1.01379	0.0197537	1.02139	0.0305354	1.0207	0.0295576	3	0.379886	0.535311	0.271394	0.0250563	FALSE
SPAC12G12.11c	YES-HU30	1.0096	0.013781	1.00717	0.0103132	1.01029	0.014774	1.00961	0.0137962	3	0.23939	0.454082	0.342866	0.0101162	FALSE
SPAC12G12.11c	YES-HU45	1.02331	0.0332424	1.02085	0.0297746	1.01662	0.0237742	1.01593	0.0227964	3	0.243818	0.444829	0.351807	0.0249552	FALSE
SPAC12G12.11c	YES-KCl0.5SDS0.01	1.00467	0.00671814	1.00226	0.00325038	1.00181	0.00260373	1.00113	0.00162592	3	0.30045	0.455933	0.341099	0.0042014	FALSE
SPAC12G12.11c	YES-KCl1SDS0.01	0.988247	-0.0170562	0.985875	-0.020524	1.00047	0.000671507	0.999788	-0.000306308	3	0.524084	0.633157	0.198488	0.0263262	FALSE
SPAC12G12.11c	YES-Ovana6	0.991173	-0.0127905	0.988794	-0.0162583	0.989464	-0.0152804	0.988794	-0.0162583	1					FALSE
SPAC12G12.11c	YES-SDS0.01	1.02056	0.0293604	1.01811	0.0258927	1.01415	0.0202716	1.01346	0.0192937	4	0.606044	0.865181	0.062893	0.071227	FALSE
SPAC12G12.11c	YES-SDS0.02	1.04716	0.0664865	1.04465	0.0630187	1.04536	0.0639965	1.04465	0.0630187	2	8.84681e-15	7.78519e-13	12.1087	0.00138606	FALSE
SPAC12G12.11c	YES-TBH15	0.934283	-0.098069	0.93204	-0.101537	0.932672	-0.100559	0.93204	-0.101537	1					FALSE
SPAC12G12.11c	YES-UV1000	1.04891	0.0688922	1.04639	0.0654244	1.04979	0.0700969	1.04908	0.0691191	3	0.0468293	0.746147	0.127176	0.0210992	FALSE
SPAC12G12.11c	YES-UV10m	0.951779	-0.0713015	0.949494	-0.0747692	0.963973	-0.0529348	0.96332	-0.0539126	3	0.295346	0.550356	0.259356	0.0594184	FALSE
SPAC12G12.11c	YES-UV2000	1.01902	0.0271837	1.01657	0.0237159	1.01936	0.0276678	1.01867	0.02669	3	0.511107	0.786899	0.104081	0.0413521	FALSE
SPAC12G12.11c	YES-UV20m	0.992562	-0.0107703	0.990179	-0.014238	0.99082	-0.0133052	0.990149	-0.014283	3	0.669013	0.749686	0.125121	0.0255736	FALSE
SPAC12G12.11c	YES-UV3000	1.01541	0.0220677	1.01298	0.0186	1.01689	0.0241671	1.0162	0.0231892	3	0.020429	0.33474	0.475293	0.00645782	FALSE
SPAC12G12.11c	YES-UV4000	0.956592	-0.0640238	0.954296	-0.0674915	0.985804	-0.0206274	0.985136	-0.0216052	3	0.299026	0.64136	0.192898	0.054055	FALSE
SPAC12G12.11c	YES-UV5m	1.11286	0.154275	1.11019	0.150807	1.04239	0.0599012	1.04169	0.0589233	3	0.383478	0.728787	0.137399	0.176104	FALSE
SPAC12G12.11c	YES-UV6000	0.960016	-0.0588694	0.957711	-0.0623371	0.978931	-0.0307206	0.978268	-0.0316984	3	0.195924	0.626263	0.203243	0.0365029	FALSE
SPAC12G12.11c	YES-UV9000	0.980437	-0.0285028	0.978083	-0.0319705	0.970801	-0.0427521	0.970144	-0.0437299	3	0.271973	0.513726	0.289268	0.0227344	FALSE
SPAC12G12.11c	YES-VPA5	0.973843	-0.0382395	0.971505	-0.0417072	0.967807	-0.0472083	0.967152	-0.0481861	3	0.0152307	0.0455018	1.34197	0.00941233	FALSE
SPAC12G12.11c	YESphlox-Act0.1	1.01494	0.0213937	1.00977	0.0140296	1.00426	0.00613738	1.00597	0.00859166	4	0.33848	0.654041	0.184395	0.025633	FALSE
SPAC12G12.11c	YESphlox-Act1	1.02141	0.0305575	1.01621	0.0231933	1.02604	0.0370903	1.02779	0.0395446	4	0.497112	0.80823	0.0924651	0.054925	FALSE
SPAC12G12.11c	YESphlox-Act2	0.997886	-0.00305358	0.992805	-0.0104178	0.998638	-0.00196616	1.00034	0.000488116	3	0.943426	0.998377	0.000705372	0.0451021	FALSE
SPAC12G12.11c	YESphlox-Aged7	0.996559	-0.00497223	0.991486	-0.0123364	0.993928	-0.00878638	0.995621	-0.0063321	6	0.702522	0.873345	0.0588143	0.0182353	FALSE
SPAC12G12.11c	YESphlox-Benza12	0.99662	-0.00488502	0.991545	-0.0122492	0.988518	-0.0166609	0.990201	-0.0142067	3	0.576175	0.733829	0.134405	0.00649363	FALSE
SPAC12G12.11c	YESphlox-Benza4	1.01632	0.0233516	1.01114	0.0159874	1.01132	0.0162354	1.01304	0.0186897	3	0.00245303	0.0651416	1.18614	0.00370577	FALSE
SPAC12G12.11c	YESphlox-Benza8	1.00679	0.00976265	1.00166	0.00239847	0.999728	-0.000391989	1.00143	0.00206229	3	0.202258	0.445717	0.350941	0.0044363	FALSE
SPAC12G12.11c	YESphlox-Bort500	1.00687	0.00988073	1.00175	0.00251655	1.00107	0.0015379	1.00277	0.00399218	3	0.312296	0.397015	0.401193	0.00774418	FALSE
SPAC12G12.11c	YESphlox-CdCl1	0.937824	-0.0926116	0.933049	-0.0999758	0.931463	-0.10243	0.933049	-0.0999758	2	2.50702e-06	4.54397e-05	4.34256	0.00448751	TRUE
SPAC12G12.11c	YESphlox-Diamide2	1.02233	0.0318607	1.01712	0.0244965	1.01244	0.0178308	1.01416	0.0202851	3	0.000647115	0.0154661	1.81062	0.00517412	FALSE
SPAC12G12.11c	YESphlox-Diamide3	1.02887	0.0410675	1.02364	0.0337034	1.0219	0.0312491	1.02364	0.0337034	2	0.405232	0.706209	0.151067	0.0306982	FALSE
SPAC12G12.11c	YESphlox-Diamide3.5	0.904783	-0.144356	0.900176	-0.151721	0.895328	-0.159513	0.896852	-0.157058	3	0.0350469	0.0896898	1.04726	0.0341535	FALSE
SPAC12G12.11c	YESphlox-EDTA4	1.01113	0.0159696	1.00598	0.00860539	0.981883	-0.0263764	0.983555	-0.0239221	3	0.839359	0.899582	0.0459591	0.0831466	FALSE
SPAC12G12.11c	YESphlox-EGTA1	0.991327	-0.0125674	0.986279	-0.0199316	0.984903	-0.0219461	0.98658	-0.0194918	3	0.216498	0.476954	0.321524	0.00790195	FALSE
SPAC12G12.11c	YESphlox-EGTA10	0.729153	-0.455707	0.72544	-0.463071	0.791186	-0.337911	0.792533	-0.335457	3	0.106649	0.314681	0.50213	0.166299	FALSE
SPAC12G12.11c	YESphlox-EGTA15	0.969432	-0.0447889	0.964496	-0.0521531	1.01987	0.0283841	1.02161	0.0308384	3	0.7808	0.920627	0.0359165	0.165704	FALSE
SPAC12G12.11c	YESphlox-EGTA5	1.00633	0.00911026	1.00121	0.00174608	1.00738	0.0106094	1.0091	0.0130636	3	0.72444	0.908837	0.041514	0.02638	FALSE
SPAC12G12.11c	YESphlox-EtOH0.1	1.01284	0.0184086	1.00768	0.0110444	0.997278	-0.0039321	0.998976	-0.00147782	4	0.527053	0.724879	0.139735	0.0352163	FALSE
SPAC12G12.11c	YESphlox-EtOH10	1.01111	0.0159387	1.00596	0.00857452	1.00044	0.000628566	1.00214	0.00308285	3	0.306504	0.67017	0.173815	0.0139359	FALSE
SPAC12G12.11c	YESphlox-Forma2.5	1.00705	0.0101329	1.00192	0.00276875	1.0213	0.0304127	1.02304	0.032867	3	0.792457	0.897617	0.0469087	0.0401025	FALSE
SPAC12G12.11c	YESphlox-Gluc0.1Aged7	0.979764	-0.0294943	0.974775	-0.0368585	0.9857	-0.0207796	0.987378	-0.0183253	5	0.285715	0.470937	0.327037	0.0359673	FALSE
SPAC12G12.11c	YESphlox-Gluc0.5Aged7	0.990013	-0.0144809	0.984972	-0.0218451	0.980255	-0.0287711	0.981924	-0.0263168	12	0.093395	0.144009	0.84161	0.0127924	FALSE
SPAC12G12.11c	YESphlox-Gluc1Aged7	0.994078	-0.00856913	0.989017	-0.0159333	0.988278	-0.0170119	0.98996	-0.0145576	6	0.509457	0.676446	0.169767	0.0179587	FALSE
SPAC12G12.11c	YESphlox-Glycerol2	1.00921	0.0132221	1.00407	0.00585794	0.993684	-0.00914068	0.995376	-0.0066864	3	0.424068	0.829351	0.0812616	0.015458	FALSE
SPAC12G12.11c	YESphlox-Glycerol2MMS0.0075	0.757823	-0.400067	0.753965	-0.407431	0.773204	-0.371079	0.774521	-0.368625	3	0.00812432	0.0276227	1.55873	0.0417645	TRUE
SPAC12G12.11c	YESphlox-Glycerol3	1.0064	0.00920781	1.00128	0.00184363	0.999132	-0.00125318	1.00083	0.0012011	3	0.537153	0.792466	0.101019	0.0141077	FALSE
SPAC12G12.11c	YESphlox-Glycerol3MMS0.005	0.960816	-0.057668	0.955924	-0.0650322	0.955304	-0.0659677	0.956931	-0.0635134	3	0.0277055	0.0702536	1.15333	0.015458	FALSE
SPAC12G12.11c	YESphlox-HP10	0.961732	-0.0562929	0.956836	-0.0636571	0.983658	-0.023771	0.985333	-0.0213167	5	0.50456	0.71956	0.142933	0.115981	FALSE
SPAC12G12.11c	YESphlox-HP15	1.12007	0.163592	1.11437	0.156227	1.00113	0.00163005	1.00284	0.00408433	3	0.528613	0.661458	0.179498	0.273704	FALSE
SPAC12G12.11c	YESphlox-HP2	0.998417	-0.00228506	0.993334	-0.00964924	1.00716	0.0102897	1.00887	0.012744	6	0.927235	0.959347	0.0180243	0.0389373	FALSE
SPAC12G12.11c	YESphlox-HP4	0.997845	-0.00311253	0.992764	-0.0104767	0.994054	-0.00860342	0.995747	-0.00614914	9	0.864242	0.949002	0.0227327	0.0341808	FALSE
SPAC12G12.11c	YESphlox-HP6	1.00803	0.0115457	1.0029	0.00418153	1.00407	0.00586109	1.00578	0.00831537	8	0.541184	0.714603	0.145935	0.0333015	FALSE
SPAC12G12.11c	YESphlox-HP8	1.02178	0.0310803	1.01657	0.0237161	1.02861	0.0406976	1.03036	0.0431519	8	0.471889	0.609124	0.215295	0.0798213	FALSE
SPAC12G12.11c	YESphlox-HU8	0.99302	-0.0101048	0.987964	-0.017469	0.993015	-0.0101119	0.994706	-0.0076576	3	0.611618	0.696079	0.157341	0.0195355	FALSE
SPAC12G12.11c	YESphlox-HU8MMS0.075	1.04996	0.0703312	1.04461	0.0629671	1.05123	0.0720727	1.05302	0.074527	3	0.0454776	0.232291	0.633968	0.0219318	FALSE
SPAC12G12.11c	YESphlox-KCl0.5	1.02039	0.0291221	1.0152	0.0217579	1.02365	0.0337222	1.02539	0.0361764	3	0.261064	0.4512	0.345631	0.0229825	FALSE
SPAC12G12.11c	YESphlox-KCl0.5SDS0.004	0.995858	-0.00598826	0.990787	-0.0133524	0.980377	-0.0285917	0.982046	-0.0261374	3	0.925099	0.949443	0.0225309	0.0669532	FALSE
SPAC12G12.11c	YESphlox-KCl1	1.0159	0.0227623	1.01073	0.0153981	1.00305	0.00439829	1.00476	0.00685257	3	0.0980228	0.561491	0.250657	0.0107192	FALSE
SPAC12G12.11c	YESphlox-LiCl4	0.987099	-0.0187334	0.982073	-0.0260976	0.976947	-0.0336475	0.978611	-0.0311932	3	0.306111	0.585284	0.232633	0.0163148	FALSE
SPAC12G12.11c	YESphlox-LiCl6	0.977552	-0.0327545	0.972575	-0.0401187	0.971945	-0.0410538	0.9736	-0.0385995	3	0.0192646	0.184295	0.734487	0.00918484	FALSE
SPAC12G12.11c	YESphlox-MMS0.005	0.964906	-0.0515396	0.959993	-0.0589038	0.951706	-0.0714118	0.953327	-0.0689575	3	0.0118972	0.0406204	1.39126	0.0117132	TRUE
SPAC12G12.11c	YESphlox-MMS0.075	0.849897	-0.234641	0.845569	-0.242005	0.864179	-0.210598	0.86565	-0.208144	6	0.000868084	0.00233115	2.63243	0.0541933	TRUE
SPAC12G12.11c	YESphlox-NaCl150	1.0168	0.0240297	1.01162	0.0166655	1.00689	0.00990141	1.0086	0.0123557	3	0.135497	0.363863	0.439063	0.01302	FALSE
SPAC12G12.11c	YESphlox-NaCl150MMS0.005	0.989436	-0.0153222	0.984398	-0.0226864	0.986119	-0.0201663	0.987798	-0.017712	3	0.295858	0.428546	0.368003	0.0128188	FALSE
SPAC12G12.11c	YESphlox-Ovana0.5	1.00316	0.00454586	0.998048	-0.00281832	0.999535	-0.000670636	1.00124	0.00178364	3	0.829244	0.884774	0.0531678	0.0214363	FALSE
SPAC12G12.11c	YESphlox-Ovana1	1.02298	0.0327796	1.01777	0.0254155	1.0196	0.0280044	1.02134	0.0304587	3	0.106802	0.201272	0.696217	0.0157346	FALSE
SPAC12G12.11c	YESphlox-Ovana4	1.01694	0.0242321	1.01176	0.0168679	1.04738	0.0667824	1.04916	0.0692367	3	0.721027	0.843828	0.0737459	0.0708526	FALSE
SPAC12G12.11c	YESphlox-Phloxine2	0.997766	-0.0032267	0.992686	-0.0105909	0.985979	-0.0203717	0.987657	-0.0179174	3	0.78371	0.900513	0.0455101	0.0107206	FALSE
SPAC12G12.11c	YESphlox-Phloxine2HP10	1.095	0.130927	1.08942	0.123563	1.08758	0.121116	1.08943	0.12357	3	0.136733	0.31257	0.505052	0.0682188	FALSE
SPAC12G12.11c	YESphlox-Phloxine2HP15	1.13224	0.179175	1.12647	0.171811	1.11527	0.157392	1.11717	0.159846	3	0.192546	0.407244	0.390145	0.117927	FALSE
SPAC12G12.11c	YESphlox-SDS0.004	1.02808	0.0399562	1.02285	0.0325921	1.02299	0.0327915	1.02473	0.0352458	3	0.0514576	0.384324	0.415303	0.0143006	FALSE
SPAC12G12.11c	YESphlox-TBH1	0.997211	-0.00402998	0.992133	-0.0113942	0.982068	-0.0261057	0.98374	-0.0236514	3	0.847126	0.887996	0.0515888	0.0212023	FALSE
SPAC12G12.11c	YESphlox-TBH1.5	0.799283	-0.323221	0.795214	-0.330585	0.793862	-0.33304	0.795214	-0.330585	2	0.221778	0.408239	0.389086	0.103131	FALSE
SPAC12G12.11c	YESphlox-TSA1000	1.00751	0.0107913	1.00238	0.0034271	0.997956	-0.00295121	0.999656	-0.000496926	3	0.622666	0.795814	0.0991886	0.021879	FALSE
SPAC12G12.11c	YESphlox-TSA500	1.01751	0.0250434	1.01233	0.0176792	1.03017	0.0428804	1.03192	0.0453347	3	0.531437	0.777463	0.10932	0.040017	FALSE
SPAC12G12.11c	YESphlox-TeaTree1	1.01747	0.0249876	1.01229	0.0176234	1.01338	0.0191771	1.01511	0.0216314	3	0.196949	0.414814	0.382147	0.0164499	FALSE
SPAC12G12.11c	YESphlox-TeaTree10	0.989553	-0.0151509	0.984515	-0.0225151	0.980457	-0.0284735	0.982126	-0.0260193	3	0.372305	0.626626	0.202992	0.0154867	FALSE
SPAC12G12.11c	YESphlox-TeaTree100	1.01908	0.0272672	1.01389	0.0199031	1.01092	0.0156664	1.01264	0.0181207	3	0.0147954	0.19532	0.709252	0.00743526	FALSE
SPAC12G12.11c	YESphlox-Temp25	1.01022	0.0146715	1.00508	0.00730732	1.01501	0.0214911	1.01674	0.0239454	3	0.52179	0.815266	0.0887007	0.0224576	FALSE
SPAC12G12.11c	YESphlox-Temp25Gluc0.1	1.03505	0.0496981	1.02978	0.0423339	1.01721	0.0246242	1.01895	0.0270785	6	0.0498404	0.141808	0.8483	0.0333025	FALSE
SPAC12G12.11c	YESphlox-Temp25Gluc0.5	0.983306	-0.0242874	0.9783	-0.0316516	0.970577	-0.0430847	0.97223	-0.0406304	6	0.0671938	0.176476	0.753314	0.016558	FALSE
SPAC12G12.11c	YESphlox-Temp25Gluc1	1.00766	0.0110121	1.00253	0.00364788	0.998839	-0.00167657	1.00054	0.000777712	6	0.446268	0.594737	0.225675	0.0206037	FALSE
SPAC12G12.11c	YESphlox-Temp25Gluc3	1.00779	0.0111938	1.00266	0.00382967	1.00344	0.00495456	1.00515	0.00740884	3	0.506552	0.895482	0.0479433	0.0160969	FALSE
SPAC12G12.11c	YESphlox-Tuni20	1.09679	0.133287	1.09121	0.125923	1.08935	0.123469	1.09121	0.125923	1					FALSE
SPAC12G12.11c	YESphlox-Tuni40	1.02538	0.0361553	1.02016	0.0287911	1.04002	0.056616	1.04179	0.0590702	3	0.4788	0.75149	0.124077	0.0505202	FALSE
SPAC12G12.11c	YESphlox-Tuni60	0.759412	-0.397046	0.755545	-0.40441	0.741681	-0.431129	0.742944	-0.428675	3	0.0178736	0.245124	0.610614	0.0584402	FALSE
SPAC12G12.11c	YESphlox-Tuni80	0.982283	-0.0257892	0.977282	-0.0331533	0.975621	-0.0356076	0.977282	-0.0331533	2	0.420539	0.724262	0.140104	0.0201629	FALSE
SPAC12G12.11c	YESphlox-VPA10	0.779196	-0.359942	0.775229	-0.367306	0.813691	-0.297448	0.815076	-0.294994	3	0.0520505	0.149083	0.826572	0.0912663	FALSE
SPAC12G12.11c	YESphlox-VPA8	0.927075	-0.109242	0.922355	-0.116606	0.932744	-0.100447	0.934332	-0.0979931	3	0.0434678	0.155903	0.807146	0.0296493	FALSE
SPAC12G12.11c	YESphlox-Xylose2	0.990971	-0.0130848	0.985926	-0.020449	0.98425	-0.0229033	0.985926	-0.020449	2	0.782822	0.903524	0.0440603	0.035723	FALSE
SPAC12G12.11c	Yesphlox-Caffeine10	1.01431	0.0204978	1.00915	0.0131336	1.0326	0.0462791	1.03436	0.0487334	4	0.733034	0.989802	0.00445154	0.0757236	FALSE
SPAC12G12.11c	Yesphlox-DMSO	1.04394	0.0620348	1.03862	0.0546707	1.04591	0.0647565	1.04769	0.0672108	4	0.0477433	0.350585	0.455207	0.028332	FALSE
SPAC12G12.11c	Yesphlox-Gal2	1.01645	0.0235437	1.01128	0.0161796	1.02071	0.0295794	1.02245	0.0320336	4	0.632109	0.847684	0.0717662	0.0612504	FALSE
SPAC12G12.11c	Yesphlox-Rapa1	0.999008	-0.00143138	0.993922	-0.00879556	1.00754	0.0108432	1.00926	0.0132975	4	0.984315	0.984315	0.00686593	0.0921727	FALSE
SPAC12G12.11c	Yesphlox-Rapa100	1.04407	0.0622233	1.03876	0.0548591	1.06214	0.0869791	1.06395	0.0894334	3	0.245649	0.771186	0.112841	0.0470252	FALSE
SPAC12G12.11c	Yesphlox-Sorb1.2	1.00793	0.0113892	1.00279	0.00402506	1.00808	0.0116079	1.00979	0.0140622	3	0.538639	0.784968	0.105148	0.0179735	FALSE
SPAC12G12.11c	Yesphlox-Torin5	1.0652	0.0911268	1.05978	0.0837626	1.0114	0.0163517	1.01312	0.018806	4	0.463828	0.739033	0.131336	0.154815	FALSE
SPAC13A11.06	EMM-3AT4	0.997744	-0.00325774	1.03174	0.0450849	0.978532	-0.0313085	1.00632	0.00909056	3	0.958012	0.982789	0.00753989	0.0673776	FALSE
SPAC13A11.06	EMM-3AT6	0.977448	-0.0329088	1.01076	0.0154338	0.984151	-0.023049	1.0121	0.0173501	3	0.00833361	0.0657521	1.18209	0.00476158	FALSE
SPAC13A11.06	EMM-Bleo200	1.00696	0.0100126	1.04128	0.0583553	1.013	0.0186346	1.04177	0.0590337	3	0.35771	0.527732	0.277586	0.00499451	FALSE
SPAC13A11.06	EMM-Canav60	1.03015	0.0428479	1.06525	0.0911905	1.03526	0.0499935	1.06466	0.0903926	3	0.123017	0.366349	0.436105	0.0229839	FALSE
SPAC13A11.06	EMM-Cys	1.02374	0.0338486	1.05862	0.0821912	1.02009	0.028698	1.04906	0.0690971	6	0.268415	0.669861	0.174015	0.0465706	FALSE
SPAC13A11.06	EMM-Met	1.02097	0.0299466	1.05577	0.0782893	1.0277	0.0394192	1.05688	0.0798183	6	0.0280188	0.571104	0.243285	0.0137276	FALSE
SPAC13A11.06	EMMphlox-Act0.1	0.957807	-0.0621933	1.00707	0.0101643	0.967658	-0.0474311	1.0128	0.0183537	4	0.198498	0.570621	0.243652	0.0537148	FALSE
SPAC13A11.06	EMMphlox-Act1	0.973607	-0.0385887	1.02368	0.0337689	0.971113	-0.0422891	1.01642	0.0234957	4	0.145802	0.632955	0.198627	0.0273768	FALSE
SPAC13A11.06	EMMphlox-Act2	0.990765	-0.0133849	1.04172	0.0589727	0.989988	-0.0145172	1.03617	0.0512676	4	0.563073	0.943955	0.0250488	0.0256387	FALSE
SPAC13A11.06	EMMphlox-Cana75	1.00232	0.00334973	1.05388	0.0757073	1.00769	0.0110562	1.05471	0.076841	6	0.871262	0.934231	0.0295457	0.0276723	FALSE
SPAC13A11.06	EMMphlox-EtOH0.1	0.96772	-0.0473384	1.01749	0.0250192	0.976498	-0.0343105	1.02206	0.0314743	4	0.0108942	0.307087	0.512739	0.0121714	FALSE
SPAC13A11.06	YES-Bleo200	0.982005	-0.0261975	1.01432	0.0205197	0.995028	-0.00719031	1.02914	0.0414347	3	0.376805	0.577284	0.23861	0.0285631	FALSE
SPAC13A11.06	YES-Bleo300	0.995023	-0.0071975	1.02777	0.0395196	0.993709	-0.00910538	1.02777	0.0395196	1					FALSE
SPAC13A11.06	YES-Bleo600	1.02823	0.0401649	1.06207	0.086882	1.02687	0.038257	1.06207	0.086882	2	9.67831e-10	2.843e-08	7.54622	0.00118275	FALSE
SPAC13A11.06	YES-Bortezomib100	1.02055	0.029352	1.05414	0.0760692	1.01283	0.0183871	1.04754	0.0670122	3	0.0813325	0.158577	0.79976	0.0128342	FALSE
SPAC13A11.06	YES-Bortezomib200	1.01062	0.0152439	1.04388	0.061961	1.00671	0.00964369	1.04122	0.0582687	3	0.201996	0.292589	0.533742	0.0105205	FALSE
SPAC13A11.06	YES-Bref60	0.958937	-0.0604918	0.990498	-0.0137747	0.938524	-0.0915346	0.970695	-0.0429095	3	0.67512	0.758263	0.12018	0.15117	FALSE
SPAC13A11.06	YES-Calco10KCl0.5	1.01036	0.0148647	1.04361	0.0615819	1.01061	0.0152327	1.04526	0.0638578	3	0.0817659	0.190787	0.719451	0.00664427	FALSE
SPAC13A11.06	YES-Calco2	1.02618	0.0372815	1.05995	0.0839987	1.02792	0.0397225	1.06315	0.0883475	3	0.22854	0.633864	0.198004	0.0276435	FALSE
SPAC13A11.06	YES-Calco4KCl0.5	1.0062	0.00891371	1.03931	0.0556309	1.00657	0.00944858	1.04107	0.0580736	3	0.699527	0.862598	0.0641917	0.024541	FALSE
SPAC13A11.06	YES-Cana120	1.00804	0.0115458	1.04121	0.058263	1.00406	0.00584199	1.03848	0.054467	3	0.371831	0.72941	0.137028	0.0123638	FALSE
SPAC13A11.06	YES-Cana60	1.02573	0.0366575	1.05949	0.0833746	1.0155	0.0221867	1.05031	0.0708117	3	0.301357	0.655674	0.183312	0.0334638	FALSE
SPAC13A11.06	YES-CoCl0.25	0.980501	-0.0284093	1.01277	0.0183078	0.975009	-0.0365129	1.00843	0.0121121	3	0.0139897	0.0928761	1.0321	0.00755161	FALSE
SPAC13A11.06	YES-CoCl5	0.994836	-0.0074691	1.02758	0.039248	0.991805	-0.011871	1.0258	0.0367541	3	0.369941	0.546459	0.262443	0.00727053	FALSE
SPAC13A11.06	YES-Cycloh100	1.00577	0.00830261	1.03887	0.0550198	1.00335	0.00482854	1.03775	0.0534536	3	0.434034	0.815033	0.0888247	0.0100849	FALSE
SPAC13A11.06	YES-Cycloh200	0.999938	-8.91883e-05	1.03285	0.046628	0.998987	-0.00146178	1.03323	0.0471633	3	0.991566	0.992541	0.00325154	0.00787527	FALSE
SPAC13A11.06	YES-Cycloh400	0.985664	-0.0208321	1.0181	0.025885	0.981904	-0.0263456	1.01556	0.0222794	3	0.589242	0.827734	0.0821092	0.0400958	FALSE
SPAC13A11.06	YES-Cycloh600	1.01648	0.0235787	1.04993	0.0702959	1.01058	0.0151782	1.04522	0.0638032	3	0.0762289	0.354686	0.450156	0.0103091	FALSE
SPAC13A11.06	YES-Dhcumarin100	0.975811	-0.0353263	1.00793	0.0113908	0.971527	-0.0416735	1.00483	0.00695154	3	0.00166961	0.0485016	1.31424	0.00634733	FALSE
SPAC13A11.06	YES-Dhcumarin200	0.994019	-0.00865454	1.02673	0.0380626	0.991742	-0.0119626	1.02574	0.0366625	3	0.70313	0.888363	0.0514096	0.0239802	FALSE
SPAC13A11.06	YES-Dhcumarin50	0.97901	-0.0306045	1.01123	0.0161126	0.983359	-0.0242103	1.01707	0.0244147	3	0.190101	0.603253	0.219501	0.0197907	FALSE
SPAC13A11.06	YES-EDTA0.1	0.995372	-0.0066919	1.02813	0.0400252	0.990641	-0.0135653	1.0246	0.0350598	3	0.552782	0.738072	0.131901	0.0110209	FALSE
SPAC13A11.06	YES-EDTA0.3	1.02868	0.0407973	1.06254	0.0875144	1.02226	0.0317636	1.0573	0.0803887	3	0.0771901	0.279522	0.553585	0.0167915	FALSE
SPAC13A11.06	YES-EDTA0.6	1.03706	0.0525052	1.0712	0.0992223	1.02335	0.0333013	1.05843	0.0819263	3	0.289344	0.461021	0.33628	0.0465349	FALSE
SPAC13A11.06	YES-EtOH5	1.01083	0.0155368	1.0441	0.0622539	1.01136	0.0162971	1.04603	0.0649222	3	0.0366614	0.101885	0.991891	0.0052506	FALSE
SPAC13A11.06	YES-Forma2	1.01818	0.0259862	1.05169	0.0727034	1.02086	0.0297826	1.05585	0.0784076	3	0.0600368	0.134101	0.872568	0.010348	FALSE
SPAC13A11.06	YES-Forma3	1.00567	0.00816247	1.03877	0.0548796	0.99549	-0.00652142	1.02961	0.0421036	3	0.811095	0.873206	0.0588831	0.0370563	FALSE
SPAC13A11.06	YES-HU30	0.99006	-0.0144128	1.02264	0.0323043	0.990015	-0.0144776	1.02395	0.0341474	3	0.395779	0.610266	0.214481	0.0164395	FALSE
SPAC13A11.06	YES-HU45	0.999858	-0.000204817	1.03277	0.0465123	1.00936	0.013441	1.04396	0.062066	3	0.99385	0.99385	0.00267899	0.0288459	FALSE
SPAC13A11.06	YES-KCl0.5SDS0.01	1.02187	0.0312133	1.0555	0.0779305	1.01658	0.0237208	1.05142	0.0723458	3	0.058144	0.16091	0.793416	0.0119763	FALSE
SPAC13A11.06	YES-KCl1SDS0.01	1.05722	0.0802793	1.09202	0.126996	1.02654	0.0377872	1.06173	0.0864122	3	0.194876	0.326623	0.485953	0.0535901	FALSE
SPAC13A11.06	YES-Ovana6	1.05601	0.0786234	1.09077	0.125341	1.05461	0.0767155	1.09077	0.125341	1					FALSE
SPAC13A11.06	YES-SDS0.01	1.01902	0.0271882	1.05256	0.0739053	1.01947	0.0278206	1.05442	0.0764456	4	0.0840391	0.645204	0.190303	0.0160241	FALSE
SPAC13A11.06	YES-SDS0.02	0.99854	-0.00210847	1.0314	0.0446087	0.998892	-0.00160009	1.03313	0.0470249	3	0.908012	0.951251	0.0217051	0.0194714	FALSE
SPAC13A11.06	YES-TBH15	1.3442	0.426743	1.38844	0.47346	1.34242	0.424835	1.38844	0.47346	1					FALSE
SPAC13A11.06	YES-UV1000	1.02728	0.038831	1.06109	0.0855481	1.03797	0.0537618	1.07355	0.102387	3	0.475153	0.908841	0.0415119	0.0559128	FALSE
SPAC13A11.06	YES-UV10m	1.04118	0.0582195	1.07545	0.104937	1.01495	0.0214078	1.04974	0.0700328	3	0.27621	0.547662	0.261487	0.0497933	FALSE
SPAC13A11.06	YES-UV2000	1.01115	0.0159917	1.04442	0.0627088	0.991118	-0.0128718	1.02509	0.0357533	3	0.631427	0.805786	0.0937802	0.0353585	FALSE
SPAC13A11.06	YES-UV20m	1.01069	0.0153433	1.04396	0.0620604	1.01651	0.0236264	1.05136	0.0722514	3	0.436848	0.540968	0.266829	0.0196842	FALSE
SPAC13A11.06	YES-UV3000	1.01054	0.0151291	1.0438	0.0618463	1.00665	0.00956493	1.04116	0.05819	3	0.308026	0.786307	0.104408	0.0139443	FALSE
SPAC13A11.06	YES-UV4000	0.988253	-0.0170483	1.02078	0.0296688	0.974849	-0.0367496	1.00827	0.0118754	3	0.547896	0.758771	0.119889	0.0291248	FALSE
SPAC13A11.06	YES-UV5m	1.03897	0.0551556	1.07317	0.101873	1.01858	0.0265594	1.0535	0.0751845	3	0.498955	0.728787	0.137399	0.0851076	FALSE
SPAC13A11.06	YES-UV6000	1.00428	0.00616397	1.03733	0.0528811	0.989364	-0.0154265	1.02328	0.0331986	3	0.797914	0.886013	0.0525599	0.0258831	FALSE
SPAC13A11.06	YES-UV9000	0.994773	-0.00756006	1.02751	0.0391571	0.998768	-0.00177913	1.033	0.0468459	3	0.601314	0.804003	0.0947421	0.0146847	FALSE
SPAC13A11.06	YES-VPA5	1.01612	0.0230738	1.04956	0.069791	1.01311	0.0187979	1.04784	0.0674229	3	0.601869	0.684984	0.164319	0.0468519	FALSE
SPAC13A11.06	YESphlox-Act0.1	0.973836	-0.0382491	1.00226	0.00325499	0.980751	-0.028041	1.01104	0.0158458	4	0.340595	0.654041	0.184395	0.0475095	FALSE
SPAC13A11.06	YESphlox-Act1	0.966598	-0.0490123	0.994809	-0.00750817	0.966433	-0.0492578	0.996284	-0.00537108	4	0.0303329	0.24361	0.613305	0.0192297	FALSE
SPAC13A11.06	YESphlox-Act2	0.943361	-0.0841185	0.970894	-0.0426144	0.992023	-0.0115545	1.02266	0.0323323	3	0.437463	0.900875	0.0453353	0.104912	FALSE
SPAC13A11.06	YESphlox-Aged7	0.990328	-0.0140212	1.01923	0.027483	0.984124	-0.0230877	1.01452	0.0207991	6	0.326742	0.6732	0.171856	0.0214506	FALSE
SPAC13A11.06	YESphlox-Benza12	0.998639	-0.00196525	1.02779	0.0395389	0.996309	-0.00533432	1.02708	0.0385525	3	0.871002	0.927476	0.0326973	0.0123956	FALSE
SPAC13A11.06	YESphlox-Benza4	1.00853	0.0122509	1.03796	0.053755	1.00301	0.00434144	1.03399	0.0482282	3	0.458603	0.865911	0.0625267	0.0164483	FALSE
SPAC13A11.06	YESphlox-Benza8	0.997476	-0.00364561	1.02659	0.0378585	0.997828	-0.00313657	1.02865	0.0407502	3	0.738204	0.836632	0.0774658	0.0108805	FALSE
SPAC13A11.06	YESphlox-Bort500	1.03877	0.0548791	1.06909	0.0963833	1.03006	0.0427234	1.06187	0.0866102	3	0.0498969	0.120458	0.919164	0.0180932	FALSE
SPAC13A11.06	YESphlox-CdCl1									0					FALSE
SPAC13A11.06	YESphlox-Diamide2	0.984285	-0.0228513	1.01301	0.0186529	0.976345	-0.0345376	1.0065	0.00934917	3	0.228338	0.493906	0.306356	0.0167038	FALSE
SPAC13A11.06	YESphlox-Diamide3	1.03105	0.0441192	1.06115	0.0856234	1.02935	0.0417366	1.06115	0.0856234	2	0.693361	0.831788	0.0799876	0.0864737	FALSE
SPAC13A11.06	YESphlox-Diamide3.5	1.08592	0.11892	1.11762	0.160424	1.06839	0.0954403	1.10139	0.139327	3	0.0528093	0.11476	0.940208	0.0378479	FALSE
SPAC13A11.06	YESphlox-EDTA4	1.10171	0.139745	1.13387	0.18125	1.10764	0.14749	1.14185	0.191377	3	0.0405952	0.303195	0.518278	0.0390246	FALSE
SPAC13A11.06	YESphlox-EGTA1	0.995089	-0.00710277	1.02413	0.0344014	0.991172	-0.0127921	1.02179	0.0310947	3	0.656415	0.76053	0.118884	0.0164444	FALSE
SPAC13A11.06	YESphlox-EGTA10	1.06782	0.0946624	1.09898	0.136166	1.09761	0.134362	1.13151	0.178249	3	0.262279	0.441441	0.355127	0.0783198	FALSE
SPAC13A11.06	YESphlox-EGTA15	1.11285	0.154258	1.14533	0.195762	1.11101	0.151875	1.14533	0.195762	2	0.171693	0.708233	0.149824	0.0463332	FALSE
SPAC13A11.06	YESphlox-EGTA5	1.0063	0.00906501	1.03567	0.0505691	0.998857	-0.00164965	1.02971	0.0422371	3	0.599409	0.821767	0.0852512	0.0177857	FALSE
SPAC13A11.06	YESphlox-EtOH0.1	0.959834	-0.0591438	0.987848	-0.0176397	0.961565	-0.0565441	0.991265	-0.0126574	4	0.120044	0.428215	0.368338	0.0386006	FALSE
SPAC13A11.06	YESphlox-EtOH10	0.986941	-0.0189635	1.01575	0.0225406	0.985547	-0.0210033	1.01599	0.0228835	4	0.177308	0.586314	0.231869	0.0152272	FALSE
SPAC13A11.06	YESphlox-Forma2.5	1.03005	0.0427079	1.06011	0.084212	1.02368	0.0337677	1.0553	0.0776545	3	0.0702175	0.176652	0.75288	0.0166945	FALSE
SPAC13A11.06	YESphlox-Gluc0.1Aged7	0.997266	-0.00394943	1.02637	0.0375547	1.00909	0.0130556	1.04026	0.0569424	5	0.864709	0.926751	0.0330368	0.0339959	FALSE
SPAC13A11.06	YESphlox-Gluc0.5Aged7	0.996266	-0.00539782	1.02534	0.0361063	0.996717	-0.00474402	1.0275	0.0391427	12	0.466411	0.571652	0.242868	0.0136219	FALSE
SPAC13A11.06	YESphlox-Gluc1Aged7	0.991644	-0.0121053	1.02059	0.0293988	0.99413	-0.0084929	1.02484	0.0353939	6	0.394162	0.560742	0.251237	0.0215449	FALSE
SPAC13A11.06	YESphlox-Glycerol2	1.0024	0.00346406	1.03166	0.0449682	1.0151	0.021627	1.04646	0.0655138	3	0.89158	0.953895	0.0204995	0.0274382	FALSE
SPAC13A11.06	YESphlox-Glycerol2MMS0.0075	1.01977	0.0282461	1.04953	0.0697503	1.01177	0.0168834	1.04302	0.0607702	3	0.575773	0.630789	0.200116	0.0530917	FALSE
SPAC13A11.06	YESphlox-Glycerol3	1.00803	0.0115316	1.03745	0.0530357	1.01006	0.0144417	1.04126	0.0583285	3	0.345966	0.661011	0.179791	0.0115277	FALSE
SPAC13A11.06	YESphlox-Glycerol3MMS0.005	1.01423	0.0203901	1.04384	0.0618942	1.01617	0.02314	1.04756	0.0670268	3	0.0370227	0.0842707	1.07432	0.00717107	FALSE
SPAC13A11.06	YESphlox-HP10	1.0064	0.00920937	1.03578	0.0507135	0.982243	-0.0258474	1.01258	0.0180394	5	0.865913	0.93644	0.0285202	0.0816123	FALSE
SPAC13A11.06	YESphlox-HP15	1.19139	0.252651	1.22617	0.294155	1.16791	0.223923	1.20398	0.26781	3	0.321885	0.487459	0.312062	0.261486	FALSE
SPAC13A11.06	YESphlox-HP2	1.02379	0.0339208	1.05367	0.0754249	1.02103	0.0300296	1.05257	0.0739163	6	0.0896323	0.535553	0.271198	0.0283596	FALSE
SPAC13A11.06	YESphlox-HP4	1.01149	0.0164857	1.04101	0.0579898	1.01105	0.0158481	1.04227	0.0597348	9	0.376085	0.599229	0.222407	0.036765	FALSE
SPAC13A11.06	YESphlox-HP6	1.02155	0.0307536	1.05136	0.0722577	1.012	0.0172145	1.04326	0.0611012	8	0.259657	0.492524	0.307572	0.0505296	FALSE
SPAC13A11.06	YESphlox-HP8	1.03143	0.0446462	1.06153	0.0861504	1.0273	0.0388539	1.05903	0.0827407	8	0.408924	0.564929	0.248006	0.103836	FALSE
SPAC13A11.06	YESphlox-HU8	0.99956	-0.000634831	1.02873	0.0408693	1.00889	0.0127732	1.04006	0.05666	3	0.973176	0.973176	0.0118087	0.0201797	FALSE
SPAC13A11.06	YESphlox-HU8MMS0.075	1.00675	0.00970286	1.03613	0.051207	0.994344	-0.0081826	1.02506	0.0357042	3	0.781171	0.885179	0.0529687	0.0376977	FALSE
SPAC13A11.06	YESphlox-KCl0.5	0.998134	-0.00269488	1.02727	0.0388092	0.987958	-0.0174779	1.01847	0.0264089	3	0.901921	0.941306	0.0262691	0.02346	FALSE
SPAC13A11.06	YESphlox-KCl0.5SDS0.004	1.08502	0.117727	1.11669	0.159231	1.07851	0.10904	1.11182	0.152927	3	0.0417423	0.123642	0.907835	0.0334746	FALSE
SPAC13A11.06	YESphlox-KCl1	0.979145	-0.0304057	1.00772	0.0110984	0.981807	-0.0264894	1.01213	0.0173974	3	0.127485	0.561491	0.250657	0.0157376	FALSE
SPAC13A11.06	YESphlox-LiCl4	1.00085	0.00123272	1.03007	0.0427368	0.992207	-0.0112866	1.02285	0.0326001	3	0.922998	0.952669	0.0210579	0.0131963	FALSE
SPAC13A11.06	YESphlox-LiCl6	1.01587	0.0227101	1.04552	0.0642143	0.999717	-0.000407803	1.0306	0.043479	3	0.65639	0.730442	0.136414	0.0545279	FALSE
SPAC13A11.06	YESphlox-MMS0.005	1.0052	0.00747792	1.03453	0.048982	1.01669	0.0238836	1.0481	0.0677704	3	0.747457	0.804695	0.0943689	0.0247523	FALSE
SPAC13A11.06	YESphlox-MMS0.075	1.02564	0.0365264	1.05558	0.0780305	1.02808	0.0399471	1.05983	0.0838339	6	0.112123	0.143827	0.84216	0.0333404	FALSE
SPAC13A11.06	YESphlox-NaCl150	0.993895	-0.00883425	1.0229	0.0326699	0.998262	-0.00250907	1.0291	0.0413777	3	0.590572	0.767443	0.114954	0.0167394	FALSE
SPAC13A11.06	YESphlox-NaCl150MMS0.005	0.999491	-0.000734945	1.02866	0.0407692	0.996621	-0.00488243	1.0274	0.0390043	3	0.933921	0.953877	0.0205076	0.00848082	FALSE
SPAC13A11.06	YESphlox-Ovana0.5	1.00003	4.90789e-05	1.02922	0.0415532	0.997091	-0.00420331	1.02789	0.0396835	3	0.993374	0.996306	0.00160713	0.00408275	FALSE
SPAC13A11.06	YESphlox-Ovana1	1.01218	0.0174715	1.04173	0.0589756	1.00703	0.0101135	1.03814	0.0540003	3	0.127959	0.220015	0.657547	0.00951853	FALSE
SPAC13A11.06	YESphlox-Ovana4	1.06003	0.0841083	1.09097	0.125612	1.05828	0.0817257	1.09097	0.125612	1					FALSE
SPAC13A11.06	YESphlox-Phloxine2	0.99317	-0.0098879	1.02216	0.0316162	0.990665	-0.013531	1.02126	0.0303557	3	0.346589	0.611304	0.213743	0.0096615	FALSE
SPAC13A11.06	YESphlox-Phloxine2HP10	1.07897	0.10965	1.11046	0.151154	1.08234	0.11416	1.11578	0.158047	3	0.0239735	0.190964	0.719048	0.024657	FALSE
SPAC13A11.06	YESphlox-Phloxine2HP15	1.15417	0.206855	1.18786	0.24836	1.18768	0.248149	1.22437	0.292036	3	0.0748307	0.286482	0.542902	0.0801925	FALSE
SPAC13A11.06	YESphlox-SDS0.004	1.00308	0.00443624	1.03236	0.0459404	0.996349	-0.00527634	1.02712	0.0386104	3	0.772019	0.937043	0.0282405	0.0160133	FALSE
SPAC13A11.06	YESphlox-TBH1	1.02378	0.0339001	1.05366	0.0754042	0.999537	-0.000668392	1.03041	0.0432184	3	0.413502	0.514724	0.288426	0.04136	FALSE
SPAC13A11.06	YESphlox-TBH1.5	1.24138	0.311943	1.27761	0.353448	1.23933	0.309561	1.27761	0.353448	2	0.266749	0.448358	0.348375	0.156649	FALSE
SPAC13A11.06	YESphlox-TSA1000	1.0018	0.00259301	1.03104	0.0440971	1.00017	0.000251984	1.03107	0.0441388	3	0.591111	0.784344	0.105493	0.000380817	FALSE
SPAC13A11.06	YESphlox-TSA500	1.0188	0.0268705	1.04853	0.0683746	1.00864	0.0124105	1.03979	0.0562973	3	0.292801	0.557493	0.25376	0.0238463	FALSE
SPAC13A11.06	YESphlox-TeaTree1	0.983055	-0.0246565	1.01175	0.0168477	0.984905	-0.0219434	1.01533	0.0219434	3	0.17039	0.389521	0.409469	0.0150657	FALSE
SPAC13A11.06	YESphlox-TeaTree10	0.979081	-0.0304996	1.00766	0.0110046	0.975564	-0.0356917	1.0057	0.00819505	3	0.0075592	0.0752771	1.12334	0.00706726	FALSE
SPAC13A11.06	YESphlox-TeaTree100	1.00814	0.0116993	1.03757	0.0532034	1.01369	0.01961	1.045	0.0634968	3	0.474202	0.845035	0.0731254	0.016331	FALSE
SPAC13A11.06	YESphlox-Temp25	0.999092	-0.00131053	1.02825	0.0401936	0.977851	-0.0323132	1.00805	0.0115735	3	0.973004	0.981215	0.00823602	0.042151	FALSE
SPAC13A11.06	YESphlox-Temp25Gluc0.1	1.02387	0.0340266	1.05375	0.0755307	1.0095	0.0136437	1.04068	0.0575305	6	0.0760798	0.185542	0.731559	0.0268444	FALSE
SPAC13A11.06	YESphlox-Temp25Gluc0.5	0.997461	-0.00366796	1.02657	0.0378362	0.999946	-7.7669e-05	1.03083	0.0438091	6	0.811054	0.893281	0.0490119	0.024264	FALSE
SPAC13A11.06	YESphlox-Temp25Gluc1	1.00923	0.0132519	1.03868	0.0547561	1.01333	0.0191044	1.04463	0.0629912	6	0.376789	0.545773	0.262988	0.0230225	FALSE
SPAC13A11.06	YESphlox-Temp25Gluc3	0.994998	-0.00723404	1.02404	0.0342701	0.978559	-0.0312699	1.00878	0.0126169	3	0.817041	0.972279	0.012209	0.0336092	FALSE
SPAC13A11.06	YESphlox-Tuni20	1.05788	0.0811776	1.08876	0.122682	1.05614	0.078795	1.08876	0.122682	2	0.462691	0.761054	0.118584	0.0750366	FALSE
SPAC13A11.06	YESphlox-Tuni40	1.0585	0.0820272	1.0894	0.123531	1.05597	0.078569	1.08859	0.122456	3	0.159155	0.591608	0.227966	0.0478417	FALSE
SPAC13A11.06	YESphlox-Tuni60	1.05747	0.08061	1.08833	0.122114	1.05572	0.0782274	1.08833	0.122114	1					FALSE
SPAC13A11.06	YESphlox-Tuni80	1.0728	0.101385	1.10411	0.142889	1.05157	0.0725477	1.08405	0.116434	3	0.195927	0.607375	0.216543	0.0680506	FALSE
SPAC13A11.06	YESphlox-VPA10	1.00406	0.00584351	1.03336	0.0473476	1.00432	0.00622273	1.03534	0.0501095	3	0.81695	0.857613	0.0667087	0.0271411	FALSE
SPAC13A11.06	YESphlox-VPA8	0.99096	-0.0131019	1.01988	0.0284023	0.979737	-0.029534	1.01	0.0143528	3	0.497197	0.630863	0.200065	0.0193496	FALSE
SPAC13A11.06	YESphlox-Xylose2	1.00782	0.0112376	1.03723	0.0527417	1.00616	0.00885498	1.03723	0.0527417	2	0.831577	0.936457	0.0285122	0.0419707	FALSE
SPAC13A11.06	Yesphlox-Caffeine10	1.04339	0.0612732	1.07384	0.102777	1.04425	0.0624625	1.0765	0.106349	4	0.446861	0.892933	0.0491811	0.102185	FALSE
SPAC13A11.06	Yesphlox-DMSO	0.991854	-0.0118002	1.0208	0.0297039	0.976142	-0.0348373	1.00629	0.00904945	4	0.696754	0.882879	0.054099	0.0386938	FALSE
SPAC13A11.06	Yesphlox-Gal2	0.983677	-0.0237437	1.01239	0.0177604	0.983741	-0.0236498	1.01413	0.0202369	4	0.0228337	0.454772	0.342206	0.00932159	FALSE
SPAC13A11.06	Yesphlox-Rapa1	0.950064	-0.0739034	0.977793	-0.0323993	0.957057	-0.0633239	0.986618	-0.0194371	4	0.0332216	0.598378	0.223025	0.0285979	FALSE
SPAC13A11.06	Yesphlox-Rapa100	0.973948	-0.0380837	1.00237	0.00342039	0.971123	-0.0422735	1.00112	0.00161325	3	0.275982	0.783465	0.10598	0.0314596	FALSE
SPAC13A11.06	Yesphlox-Sorb1.2	0.951493	-0.0717357	0.979263	-0.0302316	0.998917	-0.00156325	1.02977	0.0423235	3	0.450263	0.722234	0.141322	0.0928849	FALSE
SPAC13A11.06	Yesphlox-Torin5	1.07035	0.0980886	1.10159	0.139593	1.04718	0.0665083	1.07952	0.110395	4	0.479528	0.739402	0.13112	0.179754	FALSE
SPAC13F5.03c	EMM-3AT4	0.999268	-0.00105584	0.958877	-0.0605825	0.988311	-0.0169623	0.947995	-0.077049	3	0.977575	0.986962	0.00569939	0.0241082	FALSE
SPAC13F5.03c	EMM-3AT6	0.950866	-0.0726853	0.912431	-0.132212	0.9488	-0.075824	0.910095	-0.135911	3	0.111709	0.328147	0.483932	0.0299919	FALSE
SPAC13F5.03c	EMM-Bleo200	1.01257	0.0180202	0.97164	-0.0415065	1.0203	0.0289978	0.978681	-0.0310889	3	0.583333	0.705869	0.151276	0.0132302	FALSE
SPAC13F5.03c	EMM-Canav60	1.03464	0.0491322	0.992821	-0.0103945	1.05482	0.0769995	1.01179	0.0169127	3	0.285017	0.566118	0.247093	0.0353033	FALSE
SPAC13F5.03c	EMM-Cys	0.994397	-0.00810562	0.954203	-0.0676323	1.04254	0.0601003	1.00001	1.35545e-05	6	0.90079	0.971293	0.0126499	0.0898575	FALSE
SPAC13F5.03c	EMM-Met	1.06884	0.0960496	1.02564	0.036523	1.0324	0.0460087	0.990289	-0.0140781	6	0.0677976	0.716528	0.144767	0.0630959	FALSE
SPAC13F5.03c	EMMphlox-Act0.1	1.01161	0.0166523	0.997496	-0.00361739	1.00168	0.00241967	0.992141	-0.0113824	4	0.500816	0.775794	0.110254	0.0281335	FALSE
SPAC13F5.03c	EMMphlox-Act1	1.00112	0.00160834	0.987148	-0.0186614	0.999732	-0.000386774	0.990213	-0.0141889	4	0.923549	0.976673	0.0102508	0.0173241	FALSE
SPAC13F5.03c	EMMphlox-Act2	1.01476	0.021134	1.0006	0.000864308	1.01642	0.0235012	1.00675	0.00969911	4	0.655096	0.947932	0.0232227	0.0578943	FALSE
SPAC13F5.03c	EMMphlox-Cana75	0.993695	-0.00912515	0.979831	-0.0293949	1.0037	0.00532387	0.994141	-0.00847824	6	0.646306	0.812984	0.0899178	0.0272798	FALSE
SPAC13F5.03c	EMMphlox-EtOH0.1	0.9805	-0.0284109	0.96682	-0.0486806	0.979705	-0.0295813	0.970377	-0.0433834	4	0.465197	0.766773	0.115333	0.0450572	FALSE
SPAC13F5.03c	YES-Bleo200	0.967359	-0.0478767	0.954917	-0.066553	0.966021	-0.0498734	0.957488	-0.0626736	3	0.0994927	0.312878	0.504624	0.0202869	FALSE
SPAC13F5.03c	YES-Bleo300	0.948481	-0.0763094	0.936282	-0.0949857	0.944626	-0.0821855	0.936282	-0.0949857	1					FALSE
SPAC13F5.03c	YES-Bleo600	0.914766	-0.128525	0.903	-0.147201	0.911048	-0.134401	0.903	-0.147201	2	0.0655952	0.237152	0.624973	0.0163946	FALSE
SPAC13F5.03c	YES-Bortezomib100	1.0264	0.0375974	1.0132	0.0189211	1.01141	0.0163703	1.00248	0.00357006	3	0.127297	0.220484	0.656624	0.0188559	FALSE
SPAC13F5.03c	YES-Bortezomib200	1.02572	0.0366302	1.01252	0.0179538	1.02225	0.0317475	1.01322	0.0189473	3	0.0506977	0.1087	0.963772	0.0125961	FALSE
SPAC13F5.03c	YES-Bref60	0.825591	-0.276501	0.814972	-0.295177	0.822987	-0.281059	0.815717	-0.293859	3	0.114416	0.235016	0.628902	0.110847	FALSE
SPAC13F5.03c	YES-Calco10KCl0.5	0.990548	-0.0137008	0.977808	-0.0323771	0.989578	-0.0151153	0.980836	-0.0279155	3	0.705598	0.781081	0.107304	0.0368662	FALSE
SPAC13F5.03c	YES-Calco2	1.01495	0.021405	1.00189	0.00272867	1.00781	0.0112165	0.998903	-0.00158369	3	0.538307	0.879196	0.0559142	0.0345657	FALSE
SPAC13F5.03c	YES-Calco4KCl0.5	0.994841	-0.00746162	0.982046	-0.026138	0.993983	-0.0087064	0.985203	-0.0215066	3	0.605049	0.822322	0.0849579	0.0139418	FALSE
SPAC13F5.03c	YES-Cana120	0.977611	-0.0326681	0.965037	-0.0513444	0.971625	-0.0415286	0.963042	-0.0543288	3	0.0163397	0.16317	0.787361	0.00838558	FALSE
SPAC13F5.03c	YES-Cana60	0.990118	-0.0143277	0.977383	-0.033004	0.997698	-0.00332548	0.988885	-0.0161257	3	0.622119	0.820923	0.0856973	0.0290233	FALSE
SPAC13F5.03c	YES-CoCl0.25	1.03366	0.0477602	1.02036	0.0290839	1.03825	0.0541517	1.02908	0.0413515	3	0.167032	0.475245	0.323082	0.0276049	FALSE
SPAC13F5.03c	YES-CoCl5	0.993139	-0.00993207	0.980365	-0.0286084	1.00415	0.00597333	0.995279	-0.00682688	3	0.738709	0.844744	0.073275	0.0303491	FALSE
SPAC13F5.03c	YES-Cycloh100	1.01208	0.0173304	0.999068	-0.0013459	1.00679	0.00975845	0.997894	-0.00304176	3	0.0775179	0.469978	0.327922	0.00735668	FALSE
SPAC13F5.03c	YES-Cycloh200	0.985566	-0.0209763	0.972889	-0.0396527	0.988004	-0.0174107	0.979277	-0.030211	3	0.140915	0.689433	0.161508	0.0112801	FALSE
SPAC13F5.03c	YES-Cycloh400	0.944995	-0.0816208	0.932841	-0.100297	0.941154	-0.0874969	0.932841	-0.100297	2	0.0457656	0.400195	0.397729	0.0106797	FALSE
SPAC13F5.03c	YES-Cycloh600	0.991949	-0.0116616	0.979191	-0.0303379	0.987917	-0.0175377	0.979191	-0.0303379	2	0.498985	0.796817	0.0986415	0.0115803	FALSE
SPAC13F5.03c	YES-Dhcumarin100	1.02085	0.0297656	1.00772	0.0110893	1.01189	0.01705	1.00295	0.00424983	3	0.066118	0.349691	0.456316	0.0115722	FALSE
SPAC13F5.03c	YES-Dhcumarin200	1.02703	0.0384755	1.01382	0.0197991	1.02625	0.0373886	1.01719	0.0245884	3	0.0435187	0.310033	0.508592	0.0124791	FALSE
SPAC13F5.03c	YES-Dhcumarin50	1.01244	0.0178309	0.999414	-0.000845389	1.01429	0.0204637	1.00533	0.00766349	3	0.284038	0.689807	0.161273	0.0147973	FALSE
SPAC13F5.03c	YES-EDTA0.1	0.973249	-0.0391192	0.960731	-0.0577956	0.965399	-0.0508022	0.956872	-0.0636024	3	0.0306095	0.135683	0.867476	0.0111583	FALSE
SPAC13F5.03c	YES-EDTA0.3	0.981812	-0.0264811	0.969184	-0.0451575	0.977821	-0.0323572	0.969184	-0.0451575	2	0.159947	0.415514	0.381414	0.00918675	FALSE
SPAC13F5.03c	YES-EDTA0.6	0.988242	-0.0170632	0.975532	-0.0357395	0.966623	-0.0489746	0.958085	-0.0617748	3	0.608845	0.742418	0.129351	0.0332377	FALSE
SPAC13F5.03c	YES-EtOH5	1.00054	0.000780727	0.987672	-0.0178956	0.995358	-0.00671195	0.986566	-0.0195122	3	0.948634	0.960692	0.0174156	0.0118135	FALSE
SPAC13F5.03c	YES-Forma2	0.960292	-0.0584546	0.947941	-0.077131	0.960259	-0.0585044	0.951777	-0.0713046	3	0.000205237	0.00129083	2.88913	0.00669654	FALSE
SPAC13F5.03c	YES-Forma3	0.914099	-0.129577	0.902342	-0.148253	0.910213	-0.135724	0.902173	-0.148525	3	0.0316848	0.125319	0.901982	0.0288273	FALSE
SPAC13F5.03c	YES-HU30	1.01723	0.02464	1.00414	0.00596363	1.02569	0.0365921	1.01663	0.0237919	3	0.388777	0.607305	0.216593	0.0269387	FALSE
SPAC13F5.03c	YES-HU45	0.978563	-0.0312635	0.965977	-0.0499398	0.980983	-0.0276996	0.972318	-0.0404998	3	0.13453	0.324775	0.488418	0.0159863	FALSE
SPAC13F5.03c	YES-KCl0.5SDS0.01	0.980423	-0.0285244	0.967812	-0.0472008	0.974789	-0.0368381	0.966178	-0.0496384	3	0.250778	0.417378	0.37947	0.0212159	FALSE
SPAC13F5.03c	YES-KCl1SDS0.01	0.971208	-0.0421485	0.958716	-0.0608248	0.963337	-0.0538877	0.954828	-0.066688	3	0.33815	0.467905	0.329842	0.0394838	FALSE
SPAC13F5.03c	YES-Ovana6	1.0635	0.0888245	1.04982	0.0701481	1.05918	0.0829483	1.04982	0.0701481	2	0.162118	0.686682	0.163244	0.0248502	FALSE
SPAC13F5.03c	YES-SDS0.01	0.92844	-0.107119	0.916499	-0.125795	0.973444	-0.0388294	0.964846	-0.0516296	4	0.284845	0.822601	0.084811	0.108743	FALSE
SPAC13F5.03c	YES-SDS0.02	1.10324	0.141746	1.08905	0.123069	1.08183	0.113473	1.07227	0.100673	3	0.140167	0.283555	0.547362	0.0744191	FALSE
SPAC13F5.03c	YES-TBH15	0.682033	-0.552087	0.67326	-0.570764	0.67926	-0.557963	0.67326	-0.570764	1					FALSE
SPAC13F5.03c	YES-UV1000	1.04539	0.0640416	1.03194	0.0453652	1.06698	0.0935372	1.05756	0.080737	3	0.36072	0.908841	0.0415119	0.066031	FALSE
SPAC13F5.03c	YES-UV10m	0.979168	-0.0303714	0.966574	-0.0490477	0.974677	-0.0370035	0.966068	-0.0498037	3	1.2729e-05	0.00150838	2.82149	0.00291303	FALSE
SPAC13F5.03c	YES-UV2000	0.981474	-0.0269773	0.968851	-0.0456537	0.999191	-0.00116811	0.990365	-0.0139683	3	0.617322	0.795471	0.0993758	0.053945	FALSE
SPAC13F5.03c	YES-UV20m	0.951402	-0.0718736	0.939165	-0.0905499	0.942838	-0.0849183	0.93451	-0.0977185	3	0.00430882	0.0210165	1.67744	0.0108195	TRUE
SPAC13F5.03c	YES-UV3000	0.992362	-0.011061	0.979599	-0.0297373	0.973196	-0.0391976	0.9646	-0.0519978	3	0.716015	0.947608	0.0233714	0.0308977	FALSE
SPAC13F5.03c	YES-UV4000	0.982319	-0.0257372	0.969684	-0.0444135	0.975346	-0.0360141	0.966731	-0.0488143	3	0.688472	0.834728	0.0784549	0.0650809	FALSE
SPAC13F5.03c	YES-UV5m	0.984335	-0.0227782	0.971675	-0.0414545	0.984413	-0.0226647	0.975717	-0.0354649	3	0.16452	0.706455	0.150915	0.0131938	FALSE
SPAC13F5.03c	YES-UV6000	0.990869	-0.0132341	0.978124	-0.0319104	0.988004	-0.0174108	0.979277	-0.0302111	3	0.0697474	0.520926	0.283224	0.00488303	FALSE
SPAC13F5.03c	YES-UV9000	1.028	0.039841	1.01478	0.0211646	1.02061	0.0294263	1.01159	0.016626	3	0.032506	0.234437	0.629974	0.0117518	FALSE
SPAC13F5.03c	YES-VPA5	0.940051	-0.0891896	0.92796	-0.107866	0.935949	-0.0954978	0.927682	-0.108298	3	0.00366216	0.0189935	1.72139	0.0118432	TRUE
SPAC13F5.03c	YESphlox-Act0.1	1.01096	0.0157247	1.01076	0.015438	1.01596	0.0228412	1.01471	0.0210706	4	0.373901	0.682155	0.166117	0.0202858	FALSE
SPAC13F5.03c	YESphlox-Act1	1.03342	0.0474248	1.03321	0.0471382	1.04353	0.0614706	1.04225	0.0597001	4	0.030806	0.24361	0.613305	0.0192819	FALSE
SPAC13F5.03c	YESphlox-Act2	1.02142	0.0305752	1.02122	0.0302885	1.01591	0.0227756	1.01467	0.021005	3	0.656141	0.918598	0.0368746	0.0714686	FALSE
SPAC13F5.03c	YESphlox-Aged7	0.993703	-0.00911388	0.993505	-0.00940052	0.995538	-0.00645108	0.994317	-0.00822166	6	0.209836	0.522404	0.281994	0.006102	FALSE
SPAC13F5.03c	YESphlox-Benza12	0.990694	-0.0134889	0.990497	-0.0137755	0.995509	-0.00649332	0.994288	-0.0082639	3	0.158167	0.337518	0.471703	0.00724489	FALSE
SPAC13F5.03c	YESphlox-Benza4	0.983543	-0.0239405	0.983347	-0.0242271	0.974987	-0.0365445	0.973792	-0.0383151	3	0.264958	0.812489	0.0901827	0.0188593	FALSE
SPAC13F5.03c	YESphlox-Benza8	0.994094	-0.00854585	0.993896	-0.00883249	0.995117	-0.00706191	0.993896	-0.00883249	2	0.689639	0.800654	0.0965552	0.0156963	FALSE
SPAC13F5.03c	YESphlox-Bort500	1.08381	0.116116	1.0836	0.115829	1.14872	0.200033	1.14732	0.198263	3	0.327772	0.409308	0.38795	0.113072	FALSE
SPAC13F5.03c	YESphlox-CdCl1	1.02402	0.034247	1.02382	0.0339604	1.02508	0.035731	1.02382	0.0339604	2	0.69626	0.807662	0.0927704	0.0657193	FALSE
SPAC13F5.03c	YESphlox-Diamide2	0.974873	-0.0367137	0.974679	-0.0370003	0.976131	-0.0348535	0.974934	-0.036624	3	0.113095	0.339191	0.469555	0.0175035	FALSE
SPAC13F5.03c	YESphlox-Diamide3	0.913542	-0.130457	0.913361	-0.130743	0.914482	-0.128973	0.913361	-0.130743	2	0.255826	0.706209	0.151067	0.0527776	FALSE
SPAC13F5.03c	YESphlox-Diamide3.5	0.909879	-0.136254	0.909698	-0.136541	0.920547	-0.119436	0.919418	-0.121207	3	0.0138317	0.0484111	1.31506	0.023017	TRUE
SPAC13F5.03c	YESphlox-EDTA4	1.05882	0.0824631	1.05861	0.0821764	1.12956	0.175762	1.12818	0.173992	3	0.549985	0.681069	0.166809	0.142884	FALSE
SPAC13F5.03c	YESphlox-EGTA1	0.987892	-0.0175753	0.987695	-0.0178619	0.990478	-0.0138032	0.989263	-0.0155738	3	0.165922	0.419585	0.37718	0.0103342	FALSE
SPAC13F5.03c	YESphlox-EGTA10	0.939014	-0.0907815	0.938827	-0.0910681	0.953201	-0.0691478	0.952032	-0.0709184	3	0.169754	0.359038	0.44486	0.0506276	FALSE
SPAC13F5.03c	YESphlox-EGTA15	0.93076	-0.10352	0.930575	-0.103806	0.931717	-0.102036	0.930575	-0.103806	2	2.11949e-22	2.44801e-20	19.6112	0.000179933	TRUE
SPAC13F5.03c	YESphlox-EGTA5	1.01018	0.0146076	1.00998	0.014321	1.00486	0.00698996	1.00362	0.00521938	3	0.532286	0.785287	0.104972	0.0231758	FALSE
SPAC13F5.03c	YESphlox-EtOH0.1	0.988313	-0.0169597	0.988117	-0.0172464	0.991372	-0.0125017	0.990156	-0.0142723	4	0.283407	0.566138	0.247077	0.0172707	FALSE
SPAC13F5.03c	YESphlox-EtOH10	0.969687	-0.0444091	0.969494	-0.0446957	0.967387	-0.0478345	0.966201	-0.049605	4	0.000114771	0.0274303	1.56177	0.00763829	FALSE
SPAC13F5.03c	YESphlox-Forma2.5	0.98236	-0.0256765	0.982165	-0.0259632	0.991576	-0.0122046	0.99036	-0.0139752	3	0.283887	0.455362	0.341643	0.0212648	FALSE
SPAC13F5.03c	YESphlox-Gluc0.1Aged7	0.958927	-0.0605067	0.958737	-0.0607933	0.949132	-0.0753188	0.947968	-0.0770894	5	0.00206435	0.013705	1.86312	0.0167335	TRUE
SPAC13F5.03c	YESphlox-Gluc0.5Aged7	0.948157	-0.0768017	0.947969	-0.0770883	0.94324	-0.0843033	0.942083	-0.0860739	12	6.51319e-09	8.64807e-08	7.06308	0.017043	TRUE
SPAC13F5.03c	YESphlox-Gluc1Aged7	0.977621	-0.0326526	0.977427	-0.0329393	0.982221	-0.0258806	0.981016	-0.0276512	6	0.0564556	0.145085	0.838378	0.0219547	FALSE
SPAC13F5.03c	YESphlox-Glycerol2	1.00524	0.00753861	1.00504	0.00725197	0.992734	-0.0105202	0.991517	-0.0122908	3	0.794117	0.92475	0.0339757	0.0300258	FALSE
SPAC13F5.03c	YESphlox-Glycerol2MMS0.0075	1.01517	0.0217284	1.01497	0.0214417	1.00381	0.00548803	1.00258	0.00371745	3	0.448942	0.511236	0.291379	0.0279666	FALSE
SPAC13F5.03c	YESphlox-Glycerol3	1.02438	0.0347556	1.02418	0.034469	1.02206	0.031477	1.0208	0.0297065	3	0.0093408	0.106307	0.973437	0.00849085	FALSE
SPAC13F5.03c	YESphlox-Glycerol3MMS0.005	1.02065	0.0294927	1.02045	0.029206	1.01941	0.0277279	1.01816	0.0259573	3	0.0712494	0.132933	0.876367	0.01222	FALSE
SPAC13F5.03c	YESphlox-HP10	1.01678	0.024008	1.01658	0.0237213	1.01358	0.0194572	1.01233	0.0176866	5	0.29767	0.538185	0.269069	0.0306841	FALSE
SPAC13F5.03c	YESphlox-HP15	0.896329	-0.157899	0.896151	-0.158186	0.952819	-0.069726	0.95165	-0.0714966	3	0.205671	0.421142	0.375572	0.0972854	FALSE
SPAC13F5.03c	YESphlox-HP2	0.963604	-0.0534878	0.963413	-0.0537744	0.95738	-0.0628369	0.956205	-0.0646075	6	0.00723155	0.192038	0.716613	0.0220195	FALSE
SPAC13F5.03c	YESphlox-HP4	0.963705	-0.0533369	0.963513	-0.0536236	0.969872	-0.0441341	0.968682	-0.0459047	9	0.0067665	0.0814588	1.08906	0.0301885	FALSE
SPAC13F5.03c	YESphlox-HP6	0.982014	-0.0261843	0.981819	-0.0264709	0.974188	-0.0377273	0.972994	-0.0394978	8	0.28931	0.527824	0.277511	0.0432125	FALSE
SPAC13F5.03c	YESphlox-HP8	1.06617	0.0924344	1.06596	0.0921478	0.991836	-0.0118259	0.99062	-0.0135965	8	0.403695	0.560949	0.251077	0.210302	FALSE
SPAC13F5.03c	YESphlox-HU8	0.985841	-0.0205727	0.985645	-0.0208593	0.971957	-0.0410351	0.970765	-0.0428056	3	0.458962	0.562523	0.24986	0.0267478	FALSE
SPAC13F5.03c	YESphlox-HU8MMS0.075	0.960307	-0.0584322	0.960116	-0.0587188	0.960858	-0.0576043	0.95968	-0.0593748	3	0.00478527	0.0635378	1.19697	0.0106566	FALSE
SPAC13F5.03c	YESphlox-KCl0.5	1.00482	0.00693209	1.00462	0.00664545	1.0015	0.00215783	1.00027	0.000387247	3	0.506682	0.657548	0.182073	0.00910938	FALSE
SPAC13F5.03c	YESphlox-KCl0.5SDS0.004	1.01301	0.0186528	1.01281	0.0183661	1.00963	0.0138327	1.0084	0.0120621	3	0.398891	0.53644	0.270479	0.0210245	FALSE
SPAC13F5.03c	YESphlox-KCl1	1.00407	0.00586355	1.00387	0.00557691	0.998405	-0.00230231	0.997181	-0.00407289	3	0.702042	0.911892	0.0400567	0.015068	FALSE
SPAC13F5.03c	YESphlox-LiCl4	0.987992	-0.0174287	0.987796	-0.0177153	0.993543	-0.00934574	0.992324	-0.0111163	3	0.154782	0.41565	0.381272	0.00986909	FALSE
SPAC13F5.03c	YESphlox-LiCl6	0.868667	-0.203124	0.868495	-0.203411	0.85179	-0.23143	0.850745	-0.233201	3	0.0261028	0.203464	0.691511	0.0399286	FALSE
SPAC13F5.03c	YESphlox-MMS0.005	1.01434	0.0205347	1.01413	0.020248	1.01395	0.0199887	1.01271	0.0182181	3	0.393342	0.525188	0.279685	0.0228859	FALSE
SPAC13F5.03c	YESphlox-MMS0.075	1.03962	0.056054	1.03941	0.0557673	1.04143	0.0585591	1.04015	0.0567885	6	0.00881316	0.016079	1.79374	0.0247736	FALSE
SPAC13F5.03c	YESphlox-NaCl150	0.996917	-0.00445443	0.996719	-0.00474107	0.998023	-0.00285497	0.996799	-0.00462555	3	0.489504	0.68416	0.164842	0.00202326	FALSE
SPAC13F5.03c	YESphlox-NaCl150MMS0.005	1.03101	0.0440653	1.03081	0.0437787	1.02283	0.0325718	1.02158	0.0308013	3	0.125269	0.239747	0.620248	0.022286	FALSE
SPAC13F5.03c	YESphlox-Ovana0.5	0.983105	-0.0245833	0.982909	-0.0248699	0.993848	-0.00890274	0.992629	-0.0106733	3	0.338772	0.493699	0.306538	0.0235094	FALSE
SPAC13F5.03c	YESphlox-Ovana1	0.955082	-0.0663032	0.954892	-0.0665898	0.939625	-0.0898435	0.938472	-0.0916141	3	0.11399	0.211192	0.675323	0.0299558	FALSE
SPAC13F5.03c	YESphlox-Ovana4	1.06851	0.0956068	1.0683	0.0953202	1.04168	0.0589118	1.0404	0.0571412	3	0.246787	0.50957	0.292796	0.0734462	FALSE
SPAC13F5.03c	YESphlox-Phloxine2	1.00431	0.00620786	1.00411	0.00592122	1.0152	0.0217581	1.01395	0.0199875	3	0.755928	0.882198	0.0544339	0.020294	FALSE
SPAC13F5.03c	YESphlox-Phloxine2HP10	0.95727	-0.0630016	0.95708	-0.0632883	0.945166	-0.0813598	0.944007	-0.0831303	3	0.120759	0.288613	0.539684	0.0294665	FALSE
SPAC13F5.03c	YESphlox-Phloxine2HP15	0.798086	-0.325384	0.797927	-0.325671	0.789579	-0.340844	0.788611	-0.342615	3	0.00855203	0.139547	0.855279	0.0364856	FALSE
SPAC13F5.03c	YESphlox-SDS0.004	0.973383	-0.038921	0.973189	-0.0392077	0.987677	-0.0178887	0.986466	-0.0196593	3	0.215107	0.642632	0.192038	0.026249	FALSE
SPAC13F5.03c	YESphlox-TBH1	0.919206	-0.12154	0.919023	-0.121827	0.911234	-0.134107	0.910116	-0.135878	3	0.0105345	0.0547336	1.26175	0.0196388	FALSE
SPAC13F5.03c	YESphlox-TBH1.5	0.732724	-0.448658	0.732578	-0.448945	0.733478	-0.447174	0.732578	-0.448945	2	0.0543787	0.254084	0.595023	0.036055	FALSE
SPAC13F5.03c	YESphlox-TSA1000	1.00886	0.0127244	1.00866	0.0124378	1.01454	0.0208275	1.0133	0.0190569	3	0.382855	0.618259	0.20883	0.0134214	FALSE
SPAC13F5.03c	YESphlox-TSA500	1.02423	0.0345327	1.02402	0.0342461	1.02243	0.0320013	1.02118	0.0302307	3	0.0100236	0.0917546	1.03737	0.00855566	FALSE
SPAC13F5.03c	YESphlox-TeaTree1	1.00679	0.00976781	1.00659	0.00948117	1.00901	0.0129396	1.00777	0.0111691	3	0.74638	0.883774	0.0536589	0.0313022	FALSE
SPAC13F5.03c	YESphlox-TeaTree10	0.960289	-0.0584588	0.960099	-0.0587454	0.957811	-0.0621867	0.956636	-0.0639573	3	0.241067	0.489297	0.310428	0.0420253	FALSE
SPAC13F5.03c	YESphlox-TeaTree100	1.02502	0.0356451	1.02481	0.0353584	1.04519	0.0637617	1.04391	0.0619911	3	0.373086	0.838527	0.0764827	0.0380736	FALSE
SPAC13F5.03c	YESphlox-Temp25	0.976629	-0.034118	0.976435	-0.0344047	0.972593	-0.0400924	0.9714	-0.041863	3	0.140111	0.595711	0.224965	0.0181382	FALSE
SPAC13F5.03c	YESphlox-Temp25Gluc0.1	0.959134	-0.0601956	0.958944	-0.0604822	0.965005	-0.0513919	0.963821	-0.0531625	6	0.0487973	0.141808	0.8483	0.0387878	FALSE
SPAC13F5.03c	YESphlox-Temp25Gluc0.5	0.987262	-0.0184957	0.987065	-0.0187824	0.992305	-0.0111438	0.991088	-0.0129144	6	0.122152	0.264966	0.57681	0.0153275	FALSE
SPAC13F5.03c	YESphlox-Temp25Gluc1	0.981456	-0.0270045	0.981261	-0.0272911	0.986762	-0.0192264	0.985551	-0.0209969	6	0.0212421	0.0870659	1.06015	0.0136424	FALSE
SPAC13F5.03c	YESphlox-Temp25Gluc3	0.996482	-0.00508409	0.996284	-0.00537073	0.994724	-0.00763242	0.993504	-0.009403	3	0.629064	0.919086	0.0366439	0.00929987	FALSE
SPAC13F5.03c	YESphlox-Tuni20	1.12655	0.171913	1.12633	0.171626	1.12771	0.173397	1.12633	0.171626	2	0.433262	0.755281	0.121892	0.14499	FALSE
SPAC13F5.03c	YESphlox-Tuni40	1.12883	0.174834	1.12861	0.174547	1.07022	0.0979046	1.06891	0.096134	3	0.168011	0.591608	0.227966	0.10545	FALSE
SPAC13F5.03c	YESphlox-Tuni60	1.06323	0.0884526	1.06302	0.088166	1.07893	0.109599	1.0776	0.107828	3	0.352679	0.715939	0.145124	0.0911971	FALSE
SPAC13F5.03c	YESphlox-Tuni80	0.860224	-0.217215	0.860053	-0.217502	0.861109	-0.215732	0.860053	-0.217502	2	0.25701	0.656132	0.183009	0.0849463	FALSE
SPAC13F5.03c	YESphlox-VPA10	0.860571	-0.216634	0.8604	-0.21692	0.867846	-0.204489	0.866782	-0.206259	3	0.0404267	0.125686	0.900715	0.05167	FALSE
SPAC13F5.03c	YESphlox-VPA8	0.97368	-0.0384808	0.973486	-0.0387675	0.964944	-0.0514836	0.96376	-0.0532541	3	0.19756	0.388589	0.41051	0.0245967	FALSE
SPAC13F5.03c	YESphlox-Xylose2	0.950148	-0.073776	0.949959	-0.0740626	0.951126	-0.072292	0.949959	-0.0740626	2	0.101037	0.395868	0.40245	0.0156009	FALSE
SPAC13F5.03c	Yesphlox-Caffeine10	1.17446	0.232003	1.17423	0.231717	1.21008	0.275107	1.2086	0.273336	4	0.251712	0.88515	0.0529833	0.246337	FALSE
SPAC13F5.03c	Yesphlox-DMSO	0.980471	-0.0284525	0.980277	-0.0287391	1.00209	0.00300751	1.00086	0.00123693	4	0.623818	0.851103	0.070018	0.0713875	FALSE
SPAC13F5.03c	Yesphlox-Gal2	0.983399	-0.0241517	0.983203	-0.0244383	0.991345	-0.0125403	0.990129	-0.0143109	4	0.215133	0.571062	0.243317	0.0209603	FALSE
SPAC13F5.03c	Yesphlox-Rapa1	1.03332	0.0472865	1.03311	0.0469999	1.03139	0.0445846	1.03012	0.042814	4	0.170782	0.685346	0.16409	0.0372673	FALSE
SPAC13F5.03c	Yesphlox-Rapa100	0.928743	-0.106648	0.928559	-0.106935	0.976492	-0.0343197	0.975294	-0.0360902	3	0.287593	0.783465	0.10598	0.086051	FALSE
SPAC13F5.03c	Yesphlox-Sorb1.2	1.06959	0.0970582	1.06938	0.0967716	1.08751	0.121032	1.08618	0.119262	3	0.145676	0.574399	0.240787	0.0524215	FALSE
SPAC13F5.03c	Yesphlox-Torin5	1.06196	0.0867289	1.06175	0.0864423	1.05933	0.0831486	1.05803	0.081378	4	0.164968	0.492841	0.307293	0.067876	FALSE
SPAC13F5.04c	EMM-3AT4	0.964697	-0.0518516	0.961143	-0.0571768	0.963526	-0.0536038	0.961143	-0.0571768	2	0.216113	0.489857	0.309931	0.0227898	FALSE
SPAC13F5.04c	EMM-3AT6	0.985691	-0.0207929	0.982059	-0.0261181	0.980487	-0.0284291	0.978062	-0.0320021	3	0.202283	0.420676	0.376052	0.00869422	FALSE
SPAC13F5.04c	EMM-Bleo200	1.01373	0.0196673	1.00999	0.0143421	1.02146	0.0306325	1.01893	0.0270594	3	0.526764	0.666921	0.175925	0.0294389	FALSE
SPAC13F5.04c	EMM-Canav60	1.00634	0.0091189	1.00263	0.00379366	1.00248	0.00357306	1	0	3	0.526528	0.702467	0.153374	0.00456054	FALSE
SPAC13F5.04c	EMM-Cys	1.01506	0.0215611	1.01132	0.0162359	1.00064	0.000929186	0.998169	-0.00264387	6	0.355891	0.72579	0.139189	0.0304587	FALSE
SPAC13F5.04c	EMM-Met	0.956777	-0.0637459	0.953252	-0.0690711	0.988866	-0.016153	0.98642	-0.019726	6	0.340426	0.974361	0.0112802	0.0985563	FALSE
SPAC13F5.04c	EMMphlox-Act0.1	0.986716	-0.0192929	1.01453	0.0208055	0.980501	-0.0284093	1.0085	0.0122116	4	0.532973	0.776625	0.109789	0.0368235	FALSE
SPAC13F5.04c	EMMphlox-Act1	0.998701	-0.00187592	1.02685	0.0382224	0.98314	-0.0245314	1.01121	0.0160895	4	0.969523	0.990239	0.00425983	0.062964	FALSE
SPAC13F5.04c	EMMphlox-Act2	1.01008	0.014474	1.03855	0.0545723	1.00602	0.00865344	1.03474	0.0492744	4	0.721734	0.954579	0.020188	0.0513128	FALSE
SPAC13F5.04c	EMMphlox-Cana75	0.968194	-0.0466312	0.995482	-0.00653288	0.967591	-0.0475311	0.995222	-0.0069102	6	0.00423752	0.0375099	1.42585	0.0119429	FALSE
SPAC13F5.04c	EMMphlox-EtOH0.1	0.994042	-0.00862117	1.02206	0.0314772	1.00332	0.00477869	1.03197	0.0453996	4	0.77741	0.854019	0.0685326	0.037217	FALSE
SPAC13F5.04c	YES-Bleo200	0.985988	-0.0203581	0.991281	-0.012634	0.995791	-0.00608505	0.99668	-0.00479716	3	0.175225	0.403988	0.393631	0.0124407	FALSE
SPAC13F5.04c	YES-Bleo300	0.991397	-0.0124653	0.996719	-0.00474121	0.99583	-0.0060291	0.996719	-0.00474121	1					FALSE
SPAC13F5.04c	YES-Bleo600	0.988797	-0.016254	0.994105	-0.00852992	0.993218	-0.00981782	0.994105	-0.00852992	2	0.0828942	0.278288	0.555506	0.00481922	FALSE
SPAC13F5.04c	YES-Bortezomib100	0.952456	-0.070275	0.95757	-0.0625509	0.953571	-0.0685882	0.954422	-0.0673003	3	0.0260564	0.0689047	1.16175	0.0163713	FALSE
SPAC13F5.04c	YES-Bortezomib200	0.956336	-0.0644109	0.96147	-0.0566868	0.968016	-0.0468965	0.968881	-0.0456087	3	0.0386383	0.0914312	1.03891	0.0176008	FALSE
SPAC13F5.04c	YES-Bref60	0.768226	-0.380398	0.77235	-0.372674	0.754704	-0.406017	0.755378	-0.404729	3	0.0312103	0.111187	0.953947	0.0737873	FALSE
SPAC13F5.04c	YES-Calco10KCl0.5	0.966659	-0.0489214	0.971848	-0.0411972	0.976608	-0.034149	0.97748	-0.0328611	3	0.0742894	0.177438	0.750953	0.0182272	FALSE
SPAC13F5.04c	YES-Calco2	1.0241	0.0343601	1.0296	0.0420842	1.0413	0.0583827	1.04223	0.0596706	3	0.241018	0.651844	0.185856	0.0257264	FALSE
SPAC13F5.04c	YES-Calco4KCl0.5	0.972922	-0.0396042	0.978145	-0.0318801	0.971297	-0.0420158	0.972164	-0.0407279	3	0.158917	0.457981	0.339152	0.0220615	FALSE
SPAC13F5.04c	YES-Cana120	1.00756	0.0108661	1.01297	0.0185903	1.01339	0.0191826	1.01429	0.0204705	3	0.504587	0.831698	0.0800342	0.0160357	FALSE
[truncated: 30,339 more rows]

## Sheet: viability_stresses
strain_id	condition_short	mean_effect_size	mean_effect_size_log2	mean_fitness	mean_fitness_log2	median_effect_size	median_effect_size_log2	median_fitness	median_fitness_log2	observation_count	p_Welch	p_Welch_BH	p_Welch_BH_-log10	stdev_fitness	is_hit
[truncated: 16,013 more rows]
