# Supplementary material for: Functional profiling of long intergenic non-coding RNAs in fission yeast
Source: eLife. 2022 Jan 5;11:e76000. doi: 10.7554/eLife.76000 (PMC8730722; doi:10.7554/eLife.76000)
Supplement: Supplementary file 5. [file elife-76000-supp5.xlsx]

## Sheet: overview
Supplementary file 5: Clustering analysis of deletion-mutant phenotypes
Sheets included in this dataset
modified_z_scores	Modified z-scores for coding and non-coding genes in growth and viability conditions. The value indicates the deviation of log2 transformed effect size in units of of wt standard deviations in the same condition. Numbers without prefix refer to non-coding genes (usually SPNCRNA.xxxxx).
trigitised_data	Discretized data using a threshold of ±1.5
cluster_members	List of clusters with additional information retrieved from PomBase. Integer gene IDs are lincRNA identifiers (SPNCRNAxxx)

## Sheet: modified_z_scores
	YES_size	Bleomycin_size	Cycloheximide_size	Ethylenediaminetetraacetic acid_size	Trichostatin A_size	Tunicamycin_size	Cadmium chloride_size	0.1% glucose in media + grown for 7d_size	0.5% glucose in media + grown for 7d _size	1% glucose in media + grown for 7d _size	Grown for 7 days_size	Valproic Acid_size	EMM_size	Canavanin A_size	0.1% glucose in media + grown at 25Ã‚Â°C_size	0.5% glucose in media + grown at 25Ã‚Â°C_size	1% glucose in media + grown at 25Ã‚Â°C_size	3% glucose in media + grown at 25Ã‚Â°C_size	Ethanol_size	Formamide_size	Sodium orthovanadate_size	Grown at 25Ã‚Â°C_size	Sodium dodecyl sulfate_size	0.5M potassium chloride + 0.004% sodium dodecyl sulfate_size	Potassium chloride_size	Lithium chloride_size	Diamide_size	Hydrogen peroxide_size	Phloxine B (twice the usual concentration)_size	Phloxine B (twice the usual concentration) + 10mM hydrogen peroxide_size	Phloxine B (twice the usual concentration) + 15mM hydrogen peroxide _size	Tert-Butyl hydroperoxide_size	Benzamidine_size	Sodium Chloride_size	150mM sodium chloride + 0.005% methyl methanesulfonate_size	Glycerol as carbon source with 0.1% starter glucose_size	Methyl methanesulfonate_size	3% Glycerol as carbon source + 0.005% methyl methanesulfonate_size	2% Glycerol as carbon source with 0.1% starter glucose + 0.0075% methyl methanesulfonate_size	Xylose as carbon source with 0.1% starter glucose_size	Egtazic acid_size	Tea tree oil_size	Hydroxyurea_size	8mM hydroxyurea + 0.075% methyl methanesulfonate _size	Bortezomib_size	Dihydrocoumarin_size	UV light (Stratalinker)_size	3-Amino-1,2,4-triazole_size	Cobalt(II) chloride_size
1	-0.309322	-4.51234	1.59836	0.833964	-0.944756	0.815127	2.06768	-0.46674	-0.265756	0.00866067	-0.179034	2.27949	-1.53616	-0.38749	-0.421573	-0.681055	-0.490636	-0.758571	-1.91167	-6.80801	1.20115	-0.967672	-1.3334	-1.19526	-3.83834	5.85623	-2.33544	-1.49376	0.461338	-1.91334	-0.594283	-2.23008	0.965683	0.658763	-0.388796	0.253652	1.40052	1.18084	-0.431327	0.115926	4.67191	-2.65385	-5.14299	0.0216006	-2.45764	1.41642	1.34095	1.76955	1.55198
103	-0.108158	2.04738	0.42085	1.0326	0.154242	0.89903	0.424086	-0.156493	-0.0948231	0.0809887	-0.239053	0.363146	0.0968486	0.425333	0.0688944	0.00351189	0.285939	0.12711	0.798249	-0.511516	1.50401	0.0503396	0.54756	0.458336	-0.565725	0.630286	0.211096	0.15713	0.427927	-0.0821365	0.0110012	-0.743075	0.246548	-0.102106	-0.0682721	0.194441	-0.796256	-0.390598	-0.855545	0.0161463	0.747071	-0.178532	0.777743	0.556669	1.29537	-0.129195	0.234068	-0.307165	-0.473753
1039	-0.200696	0.259541	0.716117	0.38561	0.188477	0.221387	-0.204099	0.122126	0.122126	-0.0803538	0.204284	0.786198	-0.171661	-0.111619	-0.0650918	-0.048101	0.14804	0.135847	-0.246901	0.4972	0.49699	0.354177	0.552988	0.210162	-0.124966	-0.140324	-0.334603	-0.552837	0.0591211	0.781045	-0.0197182	0.847805	0.487435	-0.00385139	-0.178823	0.599793	-0.228329	0.0539009	-0.107713	0.35157	-0.304956	0.209036	-0.159694	0.0897006	0.165886	0.301369	0.337949	-0.217525	-0.135491
1064	0.283411	-0.992765	-0.79958	-0.442762	-0.234592	0.327029	0.205944	-0.325589	-0.325589	-0.0696401	-0.0147684	1.02766	0.654292	0.430262	-0.162933	-0.1079	0.352002	-0.232245	-0.608135	-0.579453	0.108787	-0.137971	1.00189	0.0196962	0.421113	-1.31734	0.617031	0.987756	0.211821	0.164416	0.439884	0.45169	-0.238093	0.769422	-0.0467345	0.0705516	-0.399475	-0.127896	-0.00923491	-0.0365405	-0.58674	0.47179	-0.565844	-0.317152	-0.889691	-0.262058	0.51469	-0.46084	-0.885923
1088	-0.182219	1.05582	-0.359934	-0.507818	-0.0613954	0.474148	-0.301504	-0.245077	-0.245077	-0.0139056	0.107571	-0.6554	0.144079	0.151139	-0.151799	-0.215827	-0.567226	0.222162	0.528684	0.448124	0.275774	-0.0789124	0.583194	0.756255	-0.0611859	0.164097	-0.379318	0.912146	0.329524	0.201499	-0.0310471	0.49416	0.218057	-0.278354	0.174445	0.2507	0.2287	-0.443305	0.227844	0.00924983	-0.240528	0.642164	0.241421	0.121768	-0.373505	-0.369608	-0.460936	0.434991	0.136081
1097	-0.433241				-0.678125	-1.27617	0.607297			-0.608537	0	0.463589	-0.343641	0.101287			-0.141241	-0.201639	-0.237146	0.0775565	0.263884	-0.162161						-0.483835
1119	-1.57416				-1.12698	1.60888	1.85564			-1.90362	-1.00305	1.94691	-2.91741	0.250798			-2.55484	-0.797331	0.860147	0.44985	-1.04836	0.0394212						-2.41425
1122	0.0641417	1.00251	0.604972	0.48952	-0.439581	1.0645	-0.346635	-0.141776	0.0273441	0.450934	-0.304025	-0.119241	-0.200295	0.617261	-0.0925469	0.0197126	0.0918098	0.030811	0.416598	0.247354	-0.672103	0.0778624	0.741051	1.23579	1.9719	0.898732	-0.682097	-0.283532	-0.0934523	-0.541223	0.596605	-0.749166	-0.595219	-0.345536	0.212081	-0.399558	0.178535	-0.447335	-0.302389	-0.405573	-0.439482	0.48974	-0.420389	-0.0771848	-0.841393	-0.592067	0.0856943	0.157522	0.50785
1125	0.18343	-0.558996	0.381055	0.694591	0.601491	0.762977	-0.461748	-0.0398996	0.0153538	0.0602712	-0.15149	-0.310479	0.519465	-0.653822	-0.0708818	-0.0177789	0.741055	0.166702	-0.252293	0.410712	0.860756	0.0722798	-0.745209	0.488484	-0.509318	-0.512894	-0.57803	-0.34412	0.644461	0.532758	1.09664	-0.349471	-0.361904	-0.696367	-0.553327	0.695203	-0.426138	0.162812	-0.438728	0.103333	0.750748	0.749883	-0.848157	-0.0344203	0.451655	-1.01353	0.534008	-0.112733	-0.145618
1130	0.369969	0.660817	-0.52013	0.467593	0.270835	0.649803	0.424215	-0.634924	-0.522953	-0.339629	0.20089	-0.875148	0.35934	-0.0805306	-0.263399	-0.340708	-0.313837	-0.00492542	-0.21559	-0.471682	1.31958	0.156697	0.373994	-0.214152	-0.722124	-0.829154	-0.507822	0.89682	0.0242205	0.517838	1.05731	1.06918	-0.922767	0.340482	-0.12334	0.225092	1.4912	1.2616	1.46983	-0.290176	0.680086	-0.178388	0.245613	-0.0118594	0.45806	0.476872	0.287903	-0.272591	-0.071476
115	-0.460349	0.924473	0.615643	0.467237	0.418739	1.30224	-1.05309	-0.508209	0.0335297	-0.499617	-0.463291	-0.704569	-0.196736	-0.326047	-0.0701139	0.0878936	-0.673664	-0.100108	-0.277496	0.774108	1.03452	-0.535202	-0.694831	-0.580839	-0.956262	-0.413583	-0.628783	0.256592	0.130504	0	0.49185	-1.16718	-1.18118	-0.0176757	0.512098	-0.757718	0.475614	0.0996566	1.29048	0.632024	2.35431	0.314347	-1.32852	0.0987019	-0.859159	0.929487	0.1525	-0.0216032	-0.371766
1154	-0.0121078	0.729494	0.222722	0.769861	0.22376	0.202788	0.252527	0.228848	0.228848	-0.108617	0.0745462	-0.932438	0.154121	0.158898	-0.248054	-0.0342402	-0.254674	0.240617	0.547602	-0.279496	0.572349	0.336574	-0.52771	0.12559	0.165195	0.271699	-0.192049	0.279306	0.0770374	-0.23007	0.020469	-0.641876	-0.457224	0.0742046	0.488199	-0.361695	0.408697	-0.0793616	0.0831754	-0.041104	0.941973	-0.22192	0.225868	0.214308	0.41294	0.318272	-0.14059	0.119679	0.281006
1164	0.262429	-0.834923	-0.511421	0.522269	-0.295348	0.492142	0.0690956	-0.176014	-0.0460016	-0.0211903	0.381018	1.76959	0.462081	1.33815	-0.258222	-0.0979185	0.273437	-0.186355	0.765241	-0.845375	0.455644	0.00470009	1.0116	0.212017	0.484637	-0.678503	0.294204	0.397194	-0.386827	-0.258273	-0.130734	-1.0236	-0.920915	-0.631976	0.492686	-0.485927	0.585268	0.854717	0.595605	0.217385	-0.30095	-0.332313	1.3631	-0.0211843	0.398191	0.597253	-0.169148	-0.144273	0.0359807
1165	-0.209775	-0.81224	0.327154	0.413946	0.321177	0.662799	0.488904	-0.24607	-0.0337221	-0.00852511	0.0241318	0.322373	-0.091566	0.295812	-0.377803	-0.0999155	-0.396171	0.318966	-0.589816	0.0217949	0.351057	0	0.321203	0.0474442	0.162135	-0.0196809	-0.326826	0.0866219	0.0265498	0.228796	0.0466991	-0.518582	-0.104173	0.0138303	0.251743	0.152802	0.140154	0.254991	0	0.709866	-0.95518	-0.334547	0.324247	0.157184	-0.603114	0.34701	0.356421	0.454905	-0.538112
1166	0.140283	1.23723	-0.466094	-0.481493	-0.303849	-0.361163	-0.338362	0.12595	-0.0127716	0.204924	-0.210392	-0.0588449	0.294437	0.34687	-0.0380074	0.225725	-0.240259	0.096559	0.245984	0.525521	0.497509	-0.01566	0.424717	-0.00044906	-0.876346	0.396169	-0.578368	0.272932	-0.234882	0.482635	0.502422	1.27642	0.552723	-0.513444	0.158039	0.485309	-0.386877	-0.0764169	-0.110911	-0.369301	0.885815	0.579164	-0.767881	0.114661	-0.274127	-0.492172	-0.447482	-0.55843	-0.577008
12	-0.209775	0.749695	0.426429	-0.128238	0.712042	1.0169	0.61319	0.18963	0.18963	-0.000383768	0.147103	0.877921	0.12143	-0.537745	0.0754574	0.11067	0.328798	0.350815	0.487509	0.312027	-0.172598	0.296238	0.59673	-0.251856	0.113072	-0.152761	2.37429	0.529799	-0.289597	0.125482	0.127281	-1.57591	-0.292745	0.140702	-0.217685	-0.0434214	0.824641	0.875762	0.556499	-0.00651011	0.290369	-0.321751	0.324554	0.262288	-0.439377	-0.242406	0.676087	-0.340523	0.553482
1234	-0.532763	15.1892	-0.738483	-0.516072	-0.765632	-1.00531	-1.78769	0.932171	0.932171	0.697948	0.163679	0.59372	-6.24739	3.35286	0.386936	0.231873	0.149473	0.199597	-0.684053	0.26081	-0.999076	-0.0300915	0.579761	0.0309544	3.09505	0.822479	1.60077	-0.211924	0.340852	0.072668	0.998907	2.75858	-0.663005	-0.412696	-0.000844796	-0.199636	-0.86037	-0.492542	-1.00254	0.786949	0.388588	-0.796417	-2.69925	-0.436226	-1.01171	-1.02841	-1.08712	10.1298	0.446023
1249	0.0479429	-0.715159	0.477309	0.426418	-0.200829	-0.514556	-0.058019	-0.625206	-0.250285	-0.015414	-0.030162	-0.731066	-0.0871647	0.213585	-0.589441	-0.0951374	0.111568	-0.0690235	0.0568257	-0.467895	0.80655	-0.224808	-0.309245	1.0527	0.650814	-0.100883	-0.48735	0.711847	-0.00216122	0.0814842	0.738904	-1.11144	0.281309	-0.0281232	0.504938	-0.122777	0.848792	0.378547	0.334401	-0.0239322	0.485076	-0.268062	-0.802218	0.13946	0.599364	-0.636689	0.254603	0.163128	-0.781226
1255	0.0429071	0.378961	-0.260358	0.585405	-0.427472	-0.335164	0.761596	-0.128939	-0.128939	0.162288	-0.210693	-0.647885	-0.21081	0.283879	0.0815488	0.0716636	-0.408736	-0.00152867	0.412075	-0.466915	1.40449	-0.301064	0.24341	0.378084	0.252586	1.79722	0.448013	-0.284096	0.460221	-0.437223	-0.0574268	1.80058	0.232596	0.366422	0.0555049	-0.436602	-0.490816	0.541593	-0.431268	-0.144713	4.1079	-0.706281	-1.62741	-0.0834636	0.550087	-0.257477	0.717376	-0.106228	0.423858
130	-0.0799333	-1.13739	-0.230262	0.546939	-0.568507	0.701069	-0.499454	-0.143799	-0.143799	-0.148301	-0.210015	-0.456335	0.146314	0.127076	0.0735996	-0.3439	-0.0619026	-0.169537	-0.505474	-0.779365	-0.621625	-0.127347	0.473376	0.71647	0.373824	0.33525	-0.270299	0.432062	0.322905	0.482341	0.167671	-1.41235	0.274865	0.570104	0.653575	0.363677	0.710803	-0.0487936	0.446248	0.0587927	0.347989	0.386196	-0.699512	-0.520909	-0.689593	0.462254	-0.142024	-0.2604	-0.395166
1326	0.456939	0.32768	-0.699604	0.564828	0.532349	-0.520816	0.438158	-0.76394	-0.560915	-0.199695	-0.085252	0.831077	0.143893	-0.219243	-0.340227	-0.684954	-0.458727	-0.0132413	0.337087	-0.537272	0.586832	-0.292715	0.548421	1.33532	-0.759192	0.908392	0.976859	0.638553	0.101039	0.485502	-0.129962	1.3659	0.906722	-1.01386	0.289702	-0.406364	0.439089	1.22095	0.203831	0.598255	-0.95139	0.404847	-0.607822	0.254575	0.386037	0.405975	-0.492344	0.198566	-0.905413
1343	-3.15677	4.61456	1.59011	1.82502	1.51106	2.5915	2.64768	9.69907	8.62542	6.66238	1.11163	4.16149	-1.0826	1.99989	2.98791	2.80017	2.82824	0.467568	0.773458	13.4357	3.41911	-0.0149685	4.0123	3.36301	3.61722	1.75614	-2.26655	1.6002	5.37822	2.07999	1.27964	-6.79512	2.78333	-1.23037	4.58978	0.138573	9.12796	10.7072	4.03075	2.5009	-3.30618	2.63733	-4.87389	2.82998	-2.05981	-2.33373	1.34951	-0.615859	6.25171
1348	-0.168975	-1.32293	0.890044	0.713093	0.735207	0.791632	-0.629693	-0.860178	-0.860178	-0.348426	0.0225972	-1.3737	0.371338	0.478658	-0.270434	-0.520471	0.374658	-0.0206632	-0.348637	0.730653	-0.497741	0.27557	1.03398	-0.226611	-1.55511	-0.328621	-0.570946	0.522198	0.0328932	0.841138	0.56488	-0.659857	0.423442	-0.741074	-1.35334	0.980443	-2.78534	-1.66967	-1.39682	-0.184903	-0.374186	1.1845	0.653905	0.301011	1.70971	-0.132644	-0.207324	0.336081	-0.749183
1361	0.144285	0.636282	-0.367297	-0.188245	0.369791	0.862484	-0.138512	-0.362227	-0.128682	-0.292727	-0.143017	0.326494	0.266138	0.308786	-0.226767	-0.236691	-0.066145	-0.0287091	0.722564	-0.416577	0.772357	-0.0555245	0.738685	-0.356318	-1.10461	-0.510895	0.372252	0.795778	0.469249	0.27601	-0.103203	-1.09698	-1.24111	0.0796977	0.112975	0.431218	1.21736	0.644797	0.478187	-0.0486767	0.910302	-0.950844	-0.507601	0.305581	0.667973	0.634103	0.735324	-1.25161	-0.807544
137	0.2625	-1.17436	-0.432569	0.664574	-0.603651	0.355325	-3.55947	-0.631771	-0.631771	-0.409914	-0.141462	0.686436	0.228824	0.167799	-0.134025	-0.212925	-0.207383	-0.374834	0.590227	0.349099	1.06334	-0.277709	0.643823	-0.0894866	-0.487746	-0.794042	-0.303673	0.532309	-0.111847	0.521408	1.02526	0.562272	0.293446	-0.298411	0.393353	0.44845	0.754571	0.306671	0.0361679	-0.22771	-0.340776	0.503351	0.204727	0.199016	-0.712978	-0.541049	0.510095	0.27007	-0.570214
1372	0.172666	0.396762	-0.436871	-0.562315	0.368778	1.51061	-0.334345	-0.326625	-0.0759571	0.0856937	-0.0107667	0.83754	0.149515	-0.71309	0.182612	0.202517	-0.0847782	-0.128224	-0.328683	0.412369	-1.15135	-0.14349	0.583423	1.39248	-0.49041	0.756563	0.545808	-0.523622	-0.240938	-0.693995	-0.160438	-0.36873	-0.492356	0.15225	0.575474	-0.637498	0.35077	0.403381	0.13096	-0.623805	-1.36387	0.256538	0.74332	0.162994	-0.204615	0.16154	0.631918	-0.484006	-0.27962
1415	-0.233239	0.37263	-0.535601	-0.334176	-0.342886	0.685612	-0.118977	0.0941615	0.0941615	-0.266984	0.0236652	0.786695	-0.142287	-0.107653	-0.00424395	-0.0363919	-0.105272	0.0308078	0.221294	-0.287917	0.501496	0.149356	-0.344542	-0.00155828	-0.217165	0.0994108	-0.487285	-0.220502	-0.346142	0.331655	0.00696275	1.78951	-1.05252	0.0186374	0.793162	-0.653761	-0.179016	0.155738	-0.00986703	-0.483235	0.247379	0.613541	0.474024	-0.367885	-0.615491	0.55696	0.473864	-0.106603	-0.436947
144	-0.312392	0.640715	-0.64076	-1.33291	0.226282	-0.931823	0.545596	-0.155435	-0.155435	0.194538	0.419814	-0.642203	-0.396192	0.682186	0.144287	0.15803	0.0103876	0.00252181	0.454287	-0.657402	1.28099	-0.222716	-0.421506	0.946782	2.0576	-0.577021	-1.3735	0.652712	0.574925	-0.472563	0.251533	-0.907541	-0.270972	1.37107	1.33812	-0.471659	1.5025	1.41479	1.73951	-0.0552301	0.801743	-1.28842	0.640202	0.108767	-1.45774	0.460208	-0.0802559	-0.136345	1.06221
1443	-0.209775	0.827597	0.481453	-0.093758	-0.255485	-0.168121	0.239446	-0.210795	-0.0243444	0	-0.0737005	-0.687281	0.205844	-0.351597	0.0173808	-0.0306064	-0.225238	-0.309553	0.175217	0.252056	0.383451	-0.0828068	0.408786	-0.0848616	0.734895	0.341316	0.545955	0.174504	0	0.500454	0.2451	0.796845	0.137419	0.0506745	0	-0.106842	-0.584971	-0.353649	-0.277111	0.1046	0.830337	0.29361	0.196515	0.157215	-0.230443	0.439874	0.17016	-0.384724	-0.117255
145	0.110043	1.0148	0.531665	0.793235	0.316331	0.483269	2.66052	-0.368537	-0.153231	0.140039	-0.295336	0.27761	-0.138175	0.433638	-0.269433	-0.223729	-0.32342	-0.037177	0.413774	-0.338669	0.492956	0.0131054	-1.1304	-0.0333872	0.676786	-0.220569	0.256883	0.191592	-1.03725	-0.0486351	-0.251803	0.456633	-0.139663	-0.00876846	1.17544	-0.369055	1.7582	0.729205	1.33954	-0.238085	0.443913	0.382042	1.00828	-0.213824	0.501871	-0.289883	-1.2159	0.128641	-0.686601
1460	-0.396016	-1.25042	-0.170054	0.618065	0.162773	-0.546928	-0.299659	-0.322253	-0.322253	0.0346738	0.0790317	-0.755971	0.252967	-0.345694	-0.0174454	-0.0780168	0.405818	0.0145293	0.0874847	0.746601	-0.730281	0.106328	0.621773	1.0953	1.31736	-1.20335	0.307108	-0.184912	0.180359	-0.291927	-0.0792375	-0.885754	0.63395	0.141007	0.798764	0.20981	0.139747	-0.694201	0.217977	0.486941	0.396633	0.969336	1.32218	0.0389185	0.589974	0.461466	0.932902	-0.351745	-0.663661
1519	-0.656251	-0.239895	-0.392109	-0.416451	-0.167646	-1.51116	0.132271	-0.675678	-0.553566	0.0272557	-0.307927	-1.30198	-0.420139	-0.524178	-0.520587	-0.282448	-0.23713	-0.480235	-0.287276	1.1444	0.642072	-0.77814	-0.790948	-1.39371	0.736671	-0.2744	-1.45604	-0.501808	-0.472495	0.0706354	-0.240123	-0.695381	-0.11174	0.358785	0.5929	-0.360754	0.458601	0.249199	0.109454	-0.0816128	-3.87464	-0.530107	0.505496	-0.630539	4.52553	-0.560423	1.11082	-0.227225	-0.825646
1530	0.296446	-0.684998	0.516637	0.935791	-0.682808	-0.456387	-0.11765	-0.943487	-0.937494	-0.270362	-0.206187	-0.536773	0.357232	-0.837296	-0.488361	-0.283465	-0.289858	-0.184142	0.627768	0.664971	0.53806	0.0198666	2.47259	-0.0551649	-0.544202	-0.292293	-0.251306	-0.318108	-0.299331	0.413267	0.0829627	0.335082	-0.796536	0.205155	0.0790896	-0.173515	-0.48064	0.194114	-0.000774647	-0.0748834	-0.556476	0.692866	-0.739469	0.329761	-0.383116	0.715245	-0.782453	-0.07766	0.305403
1559	-0.187054	-0.300531	0.297037	0.47992	0.125982	0.304384	-0.0898965	-0.496138	-0.496138	-0.0510037	0.287487	1.03424	-0.124151	0.547529	-0.14187	0.0655808	0.10724	0.124991	-0.481912	0.482607	-0.670095	0.301955	0.387003	-0.0141557	-0.315823	-0.60694	0.26377	0.266931	0.0837979	-0.0126296	0.157353	-2.42222	0.508223	-0.00811121	0.0525924	-0.0382273	-0.0672654	-0.14086	-0.0265873	-0.128065	0.286188	0.267929	0.442724	-0.210641	-0.461618	-0.588279	0.190508	-0.233921	-1.42154
1562	-0.0774385	-0.381978	-0.51152	0.481428	-0.0988696	0.736815	-0.322649	0.137336	-0.0485201	0.182122	0.0892828	-0.50446	-0.140996	0.176816	0.0320462	0.070317	0.537254	0.0835651	0.552284	0.566922	1.23096	0.133892	-0.458995	0.197677	-1.033	-0.474446	-0.259821	-0.276379	0.12118	0.273026	0.0615667	-1.12639	-0.827459	-0.118984	-0.0726412	-0.49854	0.312204	-0.602355	0.697526	0.445799	-0.238713	-0.781377	-1.39534	0.017951	0.709592	0.365909	0.280607	-0.121467	-0.291607
1624	0.136383	-1.04717	-0.411578	-0.292093	-0.228907	-0.42034	-0.284055	-0.330024	-0.190396	-0.0881391	0.0796612	-0.491659	0.166717	0.268824	0.15009	-0.157027	-0.143906	-0.250638	0.146075	-0.37815	0.64163	-0.365591	0.678022	0.406603	0.205101	0.297092	-0.0490022	0.562577	0.0473153	0.602403	0.649709	0.433814	-0.547035	-1.02431	-0.021934	0.563802	-0.121482	0.377304	0.113685	-0.100375	0.365892	0.623859	-0.344559	-0.347114	0.493243	0.518503	0.463311	-0.19977	-0.90445
1670	-0.309673	-0.63127	0.760121	0.785334	0.530728	0.523137	-0.043172	0.349431	0.0604122	0.0494728	-0.36368	-0.598399	-0.108336	-1.93842	0.238793	0.136	0.462815	-0.0700854	-0.605927	-0.640541	0.71522	-0.104572	-1.34532	0.810831	0.598208	-0.395046	1.42011	-1.40108	0.145015	0.679987	0.694379	-0.887861	0.791004	0.621649	-0.0166461	-0.280689	0.669027	0.446044	1.54203	0.525034	2.71269	-0.673656	0.32424	0.469507	0.886706	-0.471464	1.0138	0.193571	-0.121686
168	-0.129863	-0.996839	0.650188	-0.554992	-0.121357	0.441849	1.0698	-0.347473	-0.347473	-0.0774322	-0.0768478	1.27216	-0.174144	-0.188143	-0.110034	-0.342287	0.0643434	-0.00160001	0.852162	1.52484	-1.08405	-0.0936552	0.413632	0.044395	0.251251	-0.527572	1.51058	0.681628	0.00885318	0.335736	1.12718	0.881277	-0.542173	-0.129194	0.0748471	-0.156364	-1.40972	-1.2825	-0.621773	0.00197835	-1.03321	-1.01839	0.831604	0.169592	0.260267	0.334973	-0.754178	0.742854	-1.09913
1696	0.355783	-0.61019	0.269011	0.482655	0.494235	0.711834	0.80029	0.381266	0.381266	-0.0791093	-0.0490513	0.703467	0.367774	0.153366	0.191767	-0.0538941	0.473165	-0.0792284	0.894797	0.311895	0.646001	-0.208159	0.291761	0.500796	0.334149	-0.356712	0.386759	0.536257	-0.189168	0.266966	0.0440785	-1.15483	-0.481583	-0.277918	-0.599281	-0.356652	-0.573405	-0.724316	-0.368425	-0.394219	0.322767	-0.439004	-0.835227	0.32372	-0.319805	0.542458	-1.24016	0.52834	-0.778947
175	0.785461	-0.952337	1.10269	2.00258	1.05911	1.48307	-0.0237018	-1.22165	-1.22165	-0.554376	-0.263351	2.35391	0.982017	1.45837	-0.188577	-0.454848	-0.105698	0.817978	0.479572	1.20997	-1.20765	0.689477	-1.79002	-0.807361	-1.24084	-1.56837	0.321905	-0.851823	-0.387709	-0.299765	-0.0307492	-1.27597	-1.30199	-0.29974	-0.189083	1.18769	0.941219	0.52731	0.758281	0.0418193	-0.95812	1.07263	1.15456	-0.051224	-0.938249	-0.65701	-1.27093	-1.95887	-1.19314
177	-0.0726533	-0.3022	0.250177	-0.542221	0.472437	1.56052	0.863509	-0.542493	-0.542493	-0.261456	0.101889	0.439559	-0.174144	-0.192204	-0.384961	-0.424328	-0.16029	-0.159076	-0.539095	-0.175918	-0.813377	-0.431741	0.599499	0.230938	0.791411	-0.820755	0.757075	1.13552	0.320926	0.314537	1.67017	0.511633	-1.05147	0.360046	-0.339156	-0.282481	-0.0407244	-0.0412167	0.447262	0.310953	-0.229834	-0.233307	-0.296451	-0.41128	-0.280099	-0.378329	-0.131214	0.549401	-0.194638
187	-0.061073	-0.15443	0.208083	0.159721	0.161725	0.364969	0.397058	-0.159608	-0.0964046	0.334178	0.0289593	0.457278	0.298589	-0.188721	0.0178907	0.278138	0.22731	-0.107181	0.649807	0.106747	0.564524	0.0287384	0.689049	0.203013	-0.243264	0.412317	0.400462	0.3015	-0.19991	0.764623	-0.0367301	1.02073	0.148331	0.681666	-0.20115	0.0628869	0.243136	-0.544312	-0.142056	-0.185564	0.267032	-0.172495	0.522875	0.263206	-0.283221	-0.202776	-0.113657	-0.136966	-0.914995
188	-0.0333203	-1.31048	-0.947896	-0.450663	0.0417658	0.757717		-0.55148	-0.55148	-0.537212	0.0145911	0.449666	0.690228	-0.914365	0.115656	0.211671	-0.575132	-0.192483	0.230132	-0.66579	1.12167	-0.705527	0.938448	-0.210646	2.28591	-0.789319	-0.461771	-0.73096	0.0235653	-0.0630519	-0.709899	-0.957953	1.22975	0.521706	0.198654	-0.343381	-0.588136	-0.0725749	-0.766487	0.154094	1.39858	-0.4066	-0.788843	-0.520916	0.432276	-1.03003	1.20936	0.232362	-0.975742
189	-1.45269	-2.84721	0.422625	-1.09183	-0.425974	-2.70943	-0.402025	2.90006	2.90006	1.52935	0.725122	3.20398	-0.387561	1.24152	1.06699	0.844514	-0.0594974	0.491565	-0.679474	3.87906	-2.67321	-1.07953	1.96417	-0.138325	2.75858	1.87784	6.10274	2.13091	-0.224541	2.36882	1.38473	8.78519	-2.03822	1.58598	3.44851	1.05312	3.69001	2.65684	1.35585	4.4667	-3.70334	0.691251	-16.7144	-0.183046	7.39227	-1.48727	-0.552814	0.261996	3.79027
190	-0.126152	-0.289178	-0.600357	0.266796	0.331082	-0.299016	0.353858	-0.508663	-0.144841	0.0785766	0.00192817	-0.118471	-0.171154	0.0291698	-0.159547	0.0466014	0.232545	-0.135949	0.179712	-0.658786	1.18498	0.0623026	-0.506283	0.857486	-1.05329	0.618449	0.388577	0.278983	-0.0409145	0.278875	0.564256	0.766576	-0.172355	-0.233886	-0.486732	-0.0318484	0.369257	-0.160517	0.52306	-0.0949838	-0.720768	-0.394732	-0.203726	-0.181192	0.404256	-0.188792	0.795988	0.260649	-0.509876
194	-0.0868138	-0.71172	0.465839	-0.416688	-0.120617	0.276736	0.0187096	0.110967	0.110967	-0.0647765	-0.193205	-0.6997	0.185494	-0.142928	0.316146	0.0174986	0.25665	0.709905	0.331553	0.13917	0.756409	0.86514	0.374441	-0.021184	0.51024	-0.550209	-0.2589	0.814807	0.183713	0.946623	0.800473	1.68064	0.724173	0.0221235	-0.222922	0.374836	-0.402613	0.468707	-0.368588	-0.908348	-0.549092	-0.597329	-0.679346	0.0966603	0.998315	0.297217	0.887684	-0.581027	0.0342233
230	-0.780547				-0.733352	-0.946104	0.706993			-1.40962	-0.713074	-0.468665	0.229244	-0.687937			-0.843701	-0.920858	0.140825	-1.08819	-0.526314	-0.794259						-0.635105
236	-3.18768	4.60475	0.570954	-0.784816	0.720396	1.11882	-0.803479	3.15496	3.15496	2.056	-0.147198	2.22481	-3.39429	2.14294	1.83951	1.32531	0.538836	-0.474648	2.59594	3.73119	1.93079	-1.01605	3.22413	2.77527	2.19903	1.99011	2.64193	1.05481	-0.286166	0.301376	0.614517	5.76696	1.62308	0.0847938	1.74115	1.55562	1.31267	3.80487	1.23729	2.46965	-2.06138	-1.02381	3.9619	2.67333	-2.27682	-2.48638	-1.45608	1.89429	5.42993
239	-0.09423	0.374291	0.340368	0.390016	-0.485733	-0.333147	-2.04428	-0.180712	-0.180712	0.000427977	-0.0193921	-0.212272	0.537677	-0.727773	-0.0564312	0.050759	-0.374388	-0.33752	0.223297	-0.402558	0.566961	-0.34138	1.06649	0.200249	1.37387	-0.49448	-0.893266	-0.212324	-0.811338	-0.297549	0.0502027	0.486039	-0.059156	0.447498	0.364508	-0.347269	-0.216979	-0.326604	0.294521	-0.0118764	1.84937	-0.331421	-0.285434	-0.133912	0.220401	0.408738	0.165693	0.0176205	0.222828
242	-0.361938	-0.938162	0.15716	0.402125	-0.650135	-0.441872	0.151622	-0.343111	-0.343111	-0.0407185	-0.212099	1.25919	-0.170475	0.112292	-0.0473312	-0.180281	-0.555535	-0.269997	-0.295964	0.389588	-0.665464	-0.125743	0.156237	-0.363498	1.64305	-1.20913	0.607208	0.347565	-0.176525	0.137049	0.613381	0.701939	-0.461736	-0.775258	-0.229882	-0.878666	-1.2234	-0.631652	-0.564415	-0.113952	-0.649065	0.234314	0.475784	0.22603	0.579202	0.840887	0.155606	-0.197944	0.681218
248	-0.204233	0.297438	-0.580106	0.606644	0.551227	0.662244	0.571105	0.384404	0.384404	0.429927	0.0392959	0.452052	-0.313482	-0.241011	0.180037	0.13377	0.659472	-0.0655593	0.332639	0.439669	1.21393	-0.0114329	0.735727	0.839554	0.401298	1.13323	0.814885	0.598089	0.393391	-0.00308264	0.549099	1.2534	0.347639	1.68272	-0.0726132	-0.485684	-0.468302	-0.00962921	-0.359762	0.334372	0.69044	-0.226926	-1.3279	0.680009	1.29249	-0.910762	0.430412	0.317767	0.307717
253	0.240152				-0.627664	0.500794	0.724714			0.407421	0.43275	1.35314	-0.810883	-0.679579			-1.05442	0.381515	-0.0270273	-0.839535	-0.506156	-0.0694569						1.31505
254	-0.209775	0.540841	-0.980715	-0.0674339	0.556029	-0.723429	-0.249414	-0.489252	0.0104766	0	-0.409579	-0.358097	-0.174144	-0.316935	-0.118475	-0.302702	-0.0923451	0.10024	0.103291	-1.41369	0.631193	-0.125123	0.371405	0.115246	-1.07063	-0.357433	-0.417477	0.441894	0	-0.268144	0.046584	-1.09611	0.304353	-0.23644	0.195187	0.274854	-0.0944987	-0.145849	0.0935633	0.0035037	-0.542227	-0.455352	-0.909148	-0.00526481	-0.524782	-0.127409	-0.214298	0.406025	0.109936
256	-0.176532	-0.451968	-0.352794	-0.487924	0.376466	0.349429	-0.718042	-0.604511	0.129673	-0.108778	0.0786887	-0.704884	0.241268	-0.358075	-0.237745	0.0526209	-0.0850826	0.0824343	-0.709281	0.376781	0.508716	0.0849576	-0.23268	-0.286618	-0.347799	-0.521791	-0.0799742	0.15694	-0.447711	-0.497755	0.0865977	0.297729	-0.405995	-0.104012	0.56294	-0.470691	0.321547	0.324756	-0.18607	-0.268012	-0.224437	-0.529776	-0.736479	-0.00233691	0.512092	0.271431	0.448	-0.527011	-0.175023
26	0.162581	0.498752	-0.487614	0.679472	0.28514	0.475083	-0.0332497	-0.143473	-0.143473	-0.285412	0.421371	-0.17374	0.184297	0.205198	0.0842315	-0.019166	0.567428	0.0774915	-0.414724	0.437454	-0.40641	0.240549	-0.912439	-0.400638	-0.361115	-0.65344	-0.677056	0.579553	-0.190473	0.508543	0.411781	-1.14202	-0.755309	-0.322258	-0.209617	-0.998501	-0.0645021	-0.534328	0.428402	0.412374	0.226446	-0.774601	-0.616337	0.660031	0.426755	0.101584	-0.122632	0.175398	-0.44195
264	-0.112454				0.967486	0.774621	0.0822175			0.22388	0.210101	1.78182	0.0417741	0.213971			0.271984	0.460203	0.670848	0.674126	0.850946	0.439626						1.29645
282	-0.209775	-1.78624	0.225268	0.778775	0.382409	-0.823446	-0.0878326	-0.170052	-0.170052	-0.13535	-0.219568	-1.39897	0.325276	-0.455648	1.42138	0.993854	0.984457	0.161825	-0.883073	-0.815817	0.952733	0.308003	0.695968	-0.561955	-1.73101	0.584256	0.193431	0.239574	-0.909757	0.74633	0.502217	1.36545	0.949238	-0.00712656	-2.10414	0.149677	-3.30083	-2.30012	-2.19638	0.236987	0.821636	-0.744638	-1.11516	0.0879721	1.38273	0.385264	0.0646726	-1.08645	-0.929451
284	-0.578517	0.966118	-0.481282	0.21878	-0.695251	-4.5295	0.687466	0.431557	0.278288	0.500115	0.756595	0.360961	-0.868006	0.255829	0.131456	0.114659	0.106526	1.1261	0.868098	1.04219	-0.892447	0.806732	0.850439	-0.0166315	1.16642	2.38892	0.607126	-0.522824	-0.956846	-0.571141	-0.177794	1.369	-0.573234	-0.16039	0.0385424	-0.902794	-1.30524	-1.07388	-1.76371	0.668399	-0.471554	-0.308773	0.661948	-0.292883	-1.06983	-0.650996	-0.660917	0.472617	1.4843
289	-0.147606	0.707745	0.372819	-0.277451	-0.107748	-1.4909	-0.650453	0.277342	0.277342	-0.0309518	0.238901	-1.25366	-0.141343	0.383867	-0.0382665	0.213168	-0.126977	0.547521	0.636134	-0.608232	-1.81064	0.515966	0.357177	0.307983	0.319164	0.502741	-0.133584	0.113904	-0.285284	0.0456914	-0.093522	-0.224339	0.649275	0.474853	0.000264825	-0.190197	-0.478349	-0.238264	-0.05501	-0.548298	0.285286	0.168776	0.361322	0.0256889	-0.440581	0.124897	0.546177	0.140581	0.485
29	-0.200696				-0.22079	1.30646	0.0466701			0.305095	-0.23939	-2.81618	2.72696	-1.26739			1.39083	-0.176932	0.37775	-0.155496	0.433986	0.279176						0.391184
30	0.0902868	0.483178	-0.151322	0.9643	-0.370915	-0.147175	1.52611	-0.176904	-0.176904	-0.00881898	-0.0841864	-0.729538	0.113719	-0.141034	-0.196513	0.0158216	-0.12617	-0.228965	0.445183	0.121115	0.344877	-0.19021	0.0557475	0.180961	0.293974	0.508555	0.553393	0.395459	-0.197072	0.145211	0.278287	-0.126889	0.692618	-0.363563	-0.141515	0.537665	0.420417	-0.0373623	0.430862	-0.358319	0.168571	0.549055	0.540976	0.16191	0.377802	-0.394978	0.154646	0.114681	-0.248727
31	0.143272	-1.94648	0.510928	-0.369562	-0.587207	-1.31527	-1.20289	-0.736644	-0.396507	-0.830414	-0.225665	-0.908096	0.691407	0.201328	-0.520865	-0.178607	-0.437101	-0.1532	-0.866368	-0.426727	1.50261	-0.409719	0.353909	0.206436	-2.44943	-0.314707	0.44027	-1.08181	-0.961255	-0.487374	-0.749	1.15191	0.442867	0.681559	-2.0758	-0.4903	-3.10323	-2.62672	-3.85612	-0.156104	0.522451	-0.650783	-0.49813	-0.514672	1.80524	0.84038	0.360471	-1.01326	0.164722
311	0.498156				0.158469	0.671919	-0.721892			0.618946	0.462507	-0.896812	-1.31595	-0.301074			-0.0532805	-0.152177	0.483504	-1.34079	-0.745018	-0.520699						1.3083
318	0.539185				1.62945	1.49837				0.852073	2.0148	-1.70694	-1.76069	0.602121			-0.331106	0.861646	0.703232	0.853631		0.378168						1.13122
3205	0.387531				-0.317231	2.54916	-0.00896138			0.388674	0.73695	-2.27463	-1.15699	-0.615432			-1.01649	0.0173663	0.371704	-0.137749	-0.532808	-0.569105						0.809836
323	-0.224165	-0.498973	-0.386404	-0.894349	-1.09827	-1.31809	-1.00144	-0.386999	-0.386999	0.0260921	-0.104655	-0.788477	-0.177127	-0.642288	0.0318237	-0.452618	0.674418	-0.406204	0.96568	2.54497	-0.67087	-0.448046	0.291529	0.717893	0.900719	-0.344189	1.09191	-0.981533	-0.159721	0.00800924	0.214014	1.56466	0.858428	0.354084	0.640056	-0.458935	-0.268071	-0.58995	-0.488304	-0.316417	-0.346458	1.38603	-0.427086	-0.0816442	-1.25406	-0.629237	0.750372	1.04912	0.305098
335	0.352631	0.984408	-0.683313	-0.725055	-0.30558	-0.339863	-0.570524	0.14763	0.14763	-0.0670056	-0.392549	1.32062	0.188922	-0.281153	0.200595	0.0970317	-0.358867	-0.360469	0.45059	-0.819573	0.547051	-0.405449	-0.149127	0.315004	0.774784	-0.20747	-0.668457	0.372948	-0.168599	0.136241	0.655936	-0.574079	0.525865	0.455793	-0.329335	-0.883165	-0.25123	0.0666574	0.129807	0.049462	0.35956	0.742463	-0.778261	0.22874	0.238047	-0.407983	-0.149631	0.600591	1.22053
3461	0.153621				-1.31824	-2.32664	-0.0821923			0.0145085	-0.555493	-1.70025	-2.01441	-0.405713			-2.29644	-0.648731	0.56789	-0.723526	-2.11325	-0.0333815						0.651914
37	-0.286372	-0.833764	0.754161	-0.415153	0.182918	1.0367	-0.049773	-0.468327	-0.0328432	-0.0623436	0.0578124	0.434594	-0.388474	0.144681	-0.373018	0.142717	0.461494	0.31337	-0.605715	0.911868	1.10403	-0.00215776	0.524212	-0.455519	0.468986	0.452389	-0.701384	1.99183	-0.0908647	0.590257	0.710827	1.20675	0.391401	-0.0305029	0.531672	0.148754	0.507158	0.345214	-0.0219642	-0.469181	-1.38776	0.791236	-0.815371	-0.60524	0.422757	-0.714359	0.940869	-0.467187	-0.519873
377	0.747575	1.33981	-1.03368	0.520666	1.67625	1.2776	-0.5682	0.603654	0.603654	0.214645	0.271428	0.658384	0.463733	0.820248	0.168385	0.2109	0.516991	1.41514	0.715525	0.931819	-1.09525	1.20069	1.05264	0.574359	0.743828	1.82059	0.569309	-0.412677	-0.111043	1.23725	1.82518	-0.418437	-0.979394	0.196064	0.502728	-0.124334	0.873533	1.09616	-0.376386	-0.552036	-0.784639	1.66086	-0.676761	0.208745	-1.34137	-0.968869	-0.939187	1.68348	0.314151
382	0.168145	0.844444	-0.747256	-0.45913	0.530047	0.416066	-0.0834409	-0.814562	-0.348367	-0.155969	-0.212896	0.62135	0.258765	0.437893	-0.29084	-0.256099	0.220412	-0.365615	0.594501	-0.649282	0.446135	-0.42836	0.645085	0.207372	0.160331	0.413789	0.717805	0.164867	0.741938	0.0722638	0.695798	-1.12792	0.421526	0.037732	0.440636	-0.432827	1.45054	0.877091	1.15215	-0.517001	0.384296	-0.405803	-0.691515	0.0902939	0.467536	0.397343	0.779007	-0.101995	-1.0508
383	-0.126396	-0.777899	-0.315125	-0.534073	-0.740745	-0.54871	0.709389	-0.151303	-0.151303	-0.0953926	-0.119266	-1.03747	0.127913	0.286367	-0.0173319	-0.0749957	-0.220288	0.309424	0.275131	0.690735	0.413036	0.163429	0.733201	0.833874	0.0358757	0.159394	-0.959973	-0.197578	0.390513	-0.580854	-0.206433	-1.1238	0.524351	0.0703077	0.510644	-0.115544	1.60726	0.900651	1.70228	-0.242863	0.926007	0.485352	0.764968	0.0409468	0.280384	-0.401461	0.296654	0.242999	-0.673498
388	0.151398	-1.20106	0.439158	-0.418337	-0.400187	0.623794	-0.194285	0.350026	0.350026	0.107153	0.0207191	-0.270001	0.383357	-0.282406	-0.0110596	-0.0433935	0.367685	0.158203	-0.385269	0.571615	0.607294	0.252232	0.35236	-0.0576928	-0.5943	0.388846	0.479201	-0.167829	-0.283278	0.282359	-0.107758	1.2152	0.172517	0.320345	-0.725496	-0.0788932	-1.15906	-1.47065	-0.34585	0.041773	0.711844	-0.210833	-0.454599	-0.196315	0.477661	0.371219	0.737285	-0.413222	-0.233256
389	-0.200696	0.554429	0.477374	0.336536	-0.119987	-0.427096	-0.00373739	-0.221089	-0.221089	0.286485	0.362287	-0.315143	-0.392948	-0.513851	-0.0355671	-0.240233	0.432442	0.0451095	0.573949	-0.874989	0.65419	-0.0677649	-0.476366	0.38918	0.57376	-0.263422	-0.522376	-0.315938	-0.089002	0.186903	-0.496088	2.2487	1.11266	0.312901	-0.393181	-0.376621	-0.0633276	-0.541253	-0.203281	0.123565	-0.739005	0.863757	-1.58452	0.409931	0.978096	-0.381659	1.68865	-0.608487	-0.426553
394	0.0690123	0.580766	-0.138858	0.285181	-0.424959	0.336311	-0.137823	0.357378	0.357378	0.196644	0.305132	0.372186	-0.08506	0.194074	0.187587	0.0947596	0.368413	0.157211	-0.149792	-0.756866	-0.176438	0.251528	0.196757	0.300355	0.409978	0.854213	-0.289584	0.217263	-0.0482248	-0.188491	-0.469188	0.192859	-0.356511	0.594608	-0.105487	-0.19683	-0.232677	-0.0400855	0.30002	-0.0990285	-0.196894	-0.499425	-0.40538	-0.0250783	-0.438693	0.319646	-0.205188	-0.244656	-0.247728
399	-0.453146	2.15033	-1.45251	0.37621	0.532739	1.20681	0.525164	-0.445818	-0.445818	-0.224584	-0.208142	0.879902	-0.904909	0.512515	-0.544414	-0.0794681	-0.569468	-0.0101749	-0.527705	0.379177	-0.648113	-0.563204	-0.368778	-0.277572	0.682477	0.943359	0.691046	-1.30285	0.671067	-0.545272	-0.595846	-1.89296	0.236091	-0.461389	0.123606	0.361018	-1.21998	0.0780932	-1.13527	0.203682	-0.515536	0.679464	1.39452	0.162296	0.562866	0.819679	0.484109	2.14057	0.124017
400	-0.116952	0.895208	-0.782554	-0.956152	-0.468375	-0.90155	0.576469	0.127949	-0.12716	0.0595569	-0.15034	0.846974	-0.45839	0.235453	-0.0570714	-0.0796703	-0.116738	0.123998	0.302917	0.379404	0.637592	0.175588	-0.16049	0.342353	-0.589959	0.426698	1.06387	-0.42229	-0.402748	-0.66437	-0.0260512	0.571802	-0.216911	-0.000981118	-0.203128	-0.38175	-0.133892	0.236107	-0.082043	-0.8601	0.303501	0.292144	0.444178	-0.0517316	-0.25722	0.631345	0.42982	0.379984	0.324901
401	0.256269	-0.867366	0.639736	0.622767	0.218303	-0.188622	-0.0180325	-0.501225	-0.501225	-0.498093	-0.320091	-1.61873	0.658732	-1.0418	-0.105542	-0.157315	0.342181	-0.321204	-0.471044	0.31951	-0.480396	-0.416575	1.43917	-0.194704	-0.905468	-0.595193	0.114746	-0.365958	0.028161	-0.021802	-0.0307083	0.702034	-0.407005	-0.521005	-0.798709	-0.246836	-1.91298	-1.49105	-0.872106	0.486609	-0.241234	-0.666877	-0.952629	0.16868	0.448972	0.245036	-0.477906	-0.305466	-0.340303
402	0.525826	0.696883	-0.380058	0.594802	0.11952	0.924766	-1.15845	-0.268256	-0.268256	-0.214715	-0.00920958	0.801745	0.658445	0.506591	-0.115319	0.223953	0.0202565	-0.0604949	-0.434824	0.413715	1.12918	0.268409	0.553127	0.176921	-0.290374	0.340142	1.31578	0.32074	1.36982	0.410352	0.626408	1.26483	-1.03653	-0.0114888	-0.124603	-0.344754	1.78128	0.882387	2.65679	0.215559	-0.40509	-0.403057	-0.886814	0.0524847	0.487847	-0.613973	0.549742	0.39888	-1.40903
405	-0.928003				-1.49031	-1.12972	1.27205			-0.994523	0.0727213	2.22568	-0.0748222	0.685986			-0.0886976	0.0466594	0.43241	0.620085	1.2599	-0.521729						-0.34178
410	-0.157336	1.89766	-0.422083	-0.320724	-1.22729	-0.35816	-1.08935	-0.586193	-0.549169	-0.0998261	0.186216	-0.537694	-0.145985	0.346548	-0.110459	-0.151332	-0.211412	0.276514	-0.136978	-0.194405	0.802069	0.19143	0.70147	0.0942013	-1.30976	-0.483588	-0.504151	0.303017	-0.0580025	-0.376551	-0.0654336	-0.782284	0.320249	-0.542873	0.032734	-0.277851	0.467795	-0.012891	0.364716	-0.121877	0.688792	0.582493	0.391871	-0.0538762	-0.179342	0.131343	0.0985862	-0.0909327	0.647832
412	0.358876	-0.421035	-0.585388	-0.245274	-0.57661	-0.247018	0.47238	0.311384	0.311384	0.223076	0.508353	-0.85845	0.661656	0.407963	-0.129962	-0.153945	-0.259068	0.977629	-0.627371	0.465853	-0.95169	0.827031	0.953197	1.12324	0.787836	0.87818	-0.579286	-0.148438	-0.040112	0.210359	0.17269	-1.00666	-1.6371	-0.198191	0.0273592	0.235057	0.459653	0.686625	0.356491	0.326941	0.298842	0.162904	0.874873	0.0641397	0.706065	-0.053449	-0.171452	0.273836	0.58666
414	-0.224487	0.874517	0.874428	-0.342889	-0.877673	0.164026	-0.579372	-0.0655729	-0.0655729	0.329318	0.037124	0.579045	-0.125797	0.238478	0.0117478	-0.0540627	0.447947	0.291813	0.471776	0.565829	-0.581145	0.206713	0.284024	-0.0625109	0.793661	-0.195661	-0.972643	0.254819	-0.126791	-0.723114	-0.653027	-0.186	-0.247936	-0.156643	0.0541812	-0.391933	-1.00794	-0.2928	-0.537581	-0.30707	4.17817	0.381181	-0.152402	-0.464975	0.258444	-0.469631	0.168112	-0.111417	0.528018
421	0.250413	-0.627934	0.222635	0.85217	0.191572	1.01316	-3.79366	0.696189	0.696189	0.200112	0.688941	-2.03666	0.535476	0.375626	0.387703	0.463898	0.853495	1.19409	-1.29923	0.840607	1.8802	0.717378	-0.499548	0.367512	-0.87241	-1.96636	1.07676	0.399054	2.49002	1.04058	-0.130326	-0.556413	-0.680866	0.239668	-0.297341	1.39432	0.924981	-0.154808	0.36946	1.64373	1.82834	0.405311	-0.941754	0.213897	0.294445	0.208602	1.91169	0.197563	-0.358985
426	0.426518	-1.23437	-0.609003	-0.791557	0.361927	0.234596	0.668084	0.372543	-0.242447	0.0740516	0.0781653	-0.751187	0.289536	-0.301368	0.231903	0.0148262	-0.269236	0.146405	-0.334019	0.538224	-0.380409	-0.0639269	-1.05341	1.20824	-0.775155	0.893607	0.508675	0.944521	-0.266022	-0.194018	0.598031	-1.3421	0.218995	-0.298601	-0.931731	-0.307196	-0.596106	-0.606051	-0.532419	-0.27854	-0.633375	0.977373	-0.641758	-0.248489	-0.697127	-0.566336	0.136881	0.598393	0.503822
4302	0.578637				-1.54331	-1.05284	-1.58707			0.109104	-0.118499	-0.704845	-1.44042	-0.0930353			-1.85703	-0.689788	-0.43496	-1.08955	-1.19981	-1.21849						0.972529
4320	-0.235504				-1.44248	-1.97221	0.340211			0.865595	-0.197089	-2.51694	-0.712291	-1.60572			-0.35165	-0.626827	0.218553	-1.26733	-0.517241	-0.323359						0.698857
4472	0.368963				-1.26324	-1.01933	-1.81283			0.989758	0.631379	-0.207895	-1.32573	-0.401626			0.146279	0.0298415	0.405553	-0.25557	-1.28183	-0.582907						0.683205
452	0.133024	0.619829	0.35186	-0.21709	-0.398679	-0.191785	0.0648533	-0.433609	-0.433609	0.0766743	0.0789115	1.13178	0.14072	0.106235	-0.136262	-0.118975	0.167029	-0.0219039	0.17843	-0.3566	-0.512831	-0.0980856	0.480001	-0.175602	-0.614302	0.347534	0.506103	0.788771	-0.132914	-0.132925	0.866245	-0.730391	-0.396093	0.162547	-0.0904897	-0.545408	-0.13065	-0.168555	0.251151	-0.317385	0.608772	-0.633199	-0.722831	0.101955	-0.483354	-0.258656	-0.734554	-0.444054	-0.441666
46	-0.209775	-1.06988	0.280708	0.252378	-0.229685	0.695895	-0.27786	-0.564441	-0.0870014	0	0.243155	-0.3911	0.103012	0.150348	-0.5239	-0.319575	-0.00637442	0.406746	0.508304	0.81522	0.356256	0.499407	-0.324246	0.333363	0.358163	0.440479	0.197831	-0.332074	-0.0204893	0.660775	-0.176308	1.1009	0.101702	0.326192	0.294535	0.19269	-0.234719	-0.848345	-0.383407	0.283376	-0.510027	-0.135028	-0.606693	0.322535	0.625699	-0.838035	-0.617437	-0.0535433	0.446277
463	-0.215276	0.534336	-0.603734	-0.987055	0.00793655	-2.35406	-1.87435	-0.779919	-0.779919	0.000547012	0.109046	-0.633942	-0.341678	0.664485	-0.261792	-0.375847	-0.326092	-0.00795051	-0.781062	-0.367464	-0.411616	-0.184068	-0.293541	-0.289326	-0.735514	-0.140044	-0.433191	0.306994	0.131343	-0.796606	0.00154916	-0.785927	0.228833	0.0120853	0.00603154	0.28984	-0.819909	-0.286613	-0.240745	-0.159066	-0.44397	0.280539	-0.458725	-0.245339	0.0102661	0.415538	0.660299	0.520335	-0.773933
475	-0.200696	0.149434	0.199652	0.340202	0.29183	0.593776	-0.0853657	0.421383	0.158999	-0.39874	-0.0569501	-0.492456	0.183374	0.505434	0.194187	0.156956	-0.356619	0.262118	-0.602505	-0.566445	-0.778799	0.442049	-0.309341	-0.101714	0.28013	-0.147298	0.148531	0.44571	0.776628	0.258685	0.15866	-1.03095	-0.749261	0.470798	0.30085	-0.920929	0.561812	0.226848	0.30522	-0.24208	0.423628	0.654362	0.662903	-0.230236	1.12087	1.01319	1.33902	-0.402866	0.334325
5036	0.503271				-0.972579	3.68406	3.39627			0.99117	-0.194729	2.22799	-0.873778	0.256695			-0.0654012	-0.716683	-0.616461	-1.26556	-0.422788	-2.2306						1.09896
5040	0.519842				-2.10795	-1.78177	-0.306304			0.0983729	0.104355	-1.37899	-0.587878	-0.897563			0.186508	0.298374	0.964964	-0.488898	0.358472	-0.0408009						1.13409
5041	0.401591				-1.08927	-0.840713	0.0102018			0.275427	-0.2026	-1.05406	-0.246356	-1.9885			-1.01139	-0.631223	-0.236479	-1.40898	-0.492254	-0.957332						0.939206
507	-0.14675	-1.55246	0.568934	-0.245176	-0.239415	-0.684742	-0.635292	-0.346609	-0.150881	-0.313008	-0.106431	0.844215	0.254215	-0.361259	-0.0143388	-0.166318	-0.457755	-0.183822	0.198915	-0.486744	0.440744	-0.204973	-0.505662	-0.101968	-0.518725	-0.0830111	-0.403752	0.307557	-0.0520548	-0.204179	-0.0177074	-1.02055	-0.639848	-0.124315	0.0170364	-0.204192	-0.528107	-0.787383	-0.465193	-0.214653	0.114024	0.538008	-0.424569	-0.239703	-0.796065	0.161857	-0.523192	0.279552	-0.574481
51	-0.583945	0.743575	-0.775614	0.416262	-1.22243	-1.00116	-0.497259	-0.365447	-0.365447	-0.205549	0.0851983	-0.956176	-0.335288	-1.3883	-0.201107	-0.0973606	-0.0781478	-0.130529	-0.347711	0.616734	0.913865	-0.456623	0.420296	0.801583	0.626512	2.71135	-1.00922	-0.489246	-0.196865	0.120018	1.11646	1.09368	-0.523222	0.100805	0.535887	-0.316023	-1.37937	0.0251549	-1.48965	-1.01227	-0.843755	-0.699171	-2.42181	-1.14288	-2.14862	0.981198	0.201097	-0.365698	1.41262
515	-0.107103	0.176186	-0.375166	-0.896559	-0.468229	-0.144458	0.0204728	-0.313399	-0.313399	-0.180837	-0.0334074	-0.722766	-0.180077	0.144321	0.0842137	-0.287811	-0.138029	0.112974	-0.276111	0.446457	-0.535387	-0.00518121	0.308193	-0.342741	0.634682	0.337966	0.606376	0.0429888	-0.226644	-0.825357	-0.0288051	-1.22711	-0.392992	0.0787505	0.664009	-0.189004	1.27997	0.325673	0.459419	-0.39048	0.211756	-0.280906	0.232949	0.170654	0.594265	-0.250227	0.306044	-0.116281	-0.483126
524	-0.323023	-2.62284	-1.7863	-0.94066	-1.54804	1.3055	-1.05936	-0.391429	0.0570717	0.0907334	0.429505	-1.33114	-0.297165	-0.584219	-0.479844	-0.15461	-0.158784	0.0635694	-0.336118	-1.18435	-1.17427	0.080685	0.111918	0.107179	-0.767616	-0.340328	-3.00791	-0.505127	-0.374631	-0.781283	-0.479221	-0.320487	-0.182816	0.326748	-0.501641	0.434232	-1.84465	-1.55576	-1.51286	-0.60296	-1.16083	0.277853	0.522501	-0.241619	-1.28324	-0.475326	0.289248	-0.155401	-0.264581
5296	1.11715				-3.5545	-1.30108	-2.81206			0.84694	-1.45882	-2.85628	-1.56124	-0.148895			-0.939837	-0.942035	-0.666178	-2.62362	0.885101	-1.61159						0.810912
534	-0.201318	0.642537	-0.424	-0.355237	-0.320423	0.574021	2.82088	-0.22452	-0.22452	-0.130689	0.277539	0.294354	0.397965	-0.359029	-0.154528	-0.0201658	0.204782	0.155608	0.562657	0.695145	0.425634	-0.0716882	-0.886576	0.555727	0.388419	0.219883	-0.419695	-0.398667	0.0419222	0.134495	-0.224118	-0.425875	0.998319	0.824492	0.295684	0.166189	0.36449	0.302331	-0.377836	0.110456	0.742917	-0.445231	0.610292	0.0290392	1.62509	0.800524	0.868523	-0.348527	-0.869387
538	-0.16366	-0.558669	-0.547539	-0.491893	0.203298	-0.744134	1.07668	-0.16643	-0.16643	-0.219069	-0.00690273	0.295074	-0.35456	0.360696	-0.0809717	-0.250613	-0.462397	-0.0424514	-0.224835	-0.503292	0.852815	-0.0541124	0.160425	-0.0144801	0.455965	0.680699	0.677742	-0.415129	0.100382	-0.0827434	0.0338402	0.652662	0.201379	0.268515	-0.422877	0.378924	-0.211916	0.134602	-0.0710327	0.291414	-0.249548	0.785965	-0.561913	0.0747534	0.259143	-0.29678	-0.112897	0.603393	-0.500697
539	-0.200696	0.631279	-0.289582	-0.482443	0.0959395	0.276187	-0.0748434	0.13164	-0.0227503	-0.0194366	-0.027525	-0.231611	-0.209265	0.0136594	-0.0434701	0.0984346	0.222392	-0.306069	0.262195	-0.248623	0.238364	-0.309371	-0.329279	0.12446	0.377931	0.21812	-0.23286	0.237895	-0.236317	0.0774849	0.417499	0.398239	0.409727	0.62972	0.218553	0.128936	0.850755	-0.0294332	1.35185	-0.0175097	0.857218	0.428392	0.986641	-0.0767761	0.944523	0.422158	0.698758	-0.163538	0.0587256
549	0.517579				-0.427288	1.18388	-2.26256			-0.0920284	-0.403801	0.661398	0.621069	0.310433			0.497894	0.721138	0.197361	0.232164	0.953141	0.376687						0.43991
59	-0.100138	0.827486	0.557903	0.74145	-0.808412	-0.609275	-0.0545315	-0.124139	-0.0254576	0.12737	0.155576	0.608108	-0.174144	-0.17939	0.154301	-0.0762304	0.437676	0.18626	0.660946	0.170575	1.04472	0.314831	0.319376	0.148495	-0.242717	0.154215	0.59642	1.4176	-0.25787	0.14759	0.0134995	-0.303285	-0.375614	-0.0403258	0.989894	0.278803	1.54086	1.64317	1.23677	-0.254367	0.417778	0.346098	-0.381226	0.30874	-0.702196	-0.318626	-0.410673	0.793795	-0.527264
5916	-0.585117				-2.72969	-0.3378	0.349748			0.0520512	-0.158195	-0.657935	-0.405404	-1.66972			-2.41368	-1.71421	0.338267	-0.553631	-0.761109	-2.38946						1.25516
601	0.126628	0.564483	0.832815	-1.25801	-0.0330373	0.489738	-0.129673	-0.508841	-0.508841	0.213812	0.368645	-0.524918	0.166025	-0.505379	-0.175511	-0.0658396	0.207839	-0.106991	0.770515	0.361603	0.281845	0.0641821	1.27239	0.373068	-0.389959	0.182314	0.307685	0.398244	0.00484428	-0.0913857	0.313112	0.985225	0.164835	-0.428101	-0.201958	0.789894	0.384257	-0.49497	0.115303	0.146532	1.79235	0.669403	-0.352445	0.370122	-1.23161	0.138723	0.726334	0.359563	0.275537
603	0.257109				-0.507662	1.42151	0.704362			0.379039	0.834206	1.02676	-1.34525	-0.569294			-1.33076	-0.512532	0.257976	-0.769929	-0.340209	0.0836545						-0.670737
628	-0.464408	-0.802294	0.0940659	-0.290512	-1.16535	-0.508826	0.843975	0.192593	0.1183	-0.114869	0.127626	-0.459392	-0.720484	0.825591	-0.189827	-0.0105042	0.029192	0.316854	-1.25902	0.962377	-0.307641	-0.149289	0.613763	0.261961	1.3166	0.131095	-0.689919	-0.320763	-0.219176	-0.522717	0.314709	2.03693	-0.818061	0.195651	-0.240069	0.142771	0.403774	0.328537	0.22792	0.149188	-0.975102	0.493509	-0.273161	0.168996	-0.714744	0.807401	0.146524	0.18637	1.59863
6379	0.0442377				-0.370639	2.40443	0.480617			1.1681	0.987359	-1.75599	-0.982942	-1.24895			0.563821	0.854615	0.3096	-0.876936	-0.266791	0.839357						0.668647
650	-0.200696	1.24465	-0.371224	-0.483821	-0.340901	-0.514263	-0.271399	-0.646847	0.160855	-0.066381	0.00929006	0.339152	-0.174144	0.306497	-0.278864	0.089532	-0.0519092	-0.0758866	0.070648	-0.796989	1.03296	-0.0616721	-0.848323	-0.0592244	0.42296	0.164742	-0.467387	0.826822	0.10383	0.0860193	-0.0162894	0.885924	-0.346974	0.329677	-0.227595	0.44823	-0.452968	-0.887535	-0.472791	-0.42228	0.200573	0.579756	-0.815347	0.102329	1.67571	1.60993	1.01398	-0.379571	0.320272
6596	0.571712				-1.16812	-1.02922	-2.49612			0.130224	0.571201	-2.2229	-0.308219	-1.18172			-0.651431	-0.862279	1.27808	-1.30047	0.100609	-0.676968						0.952086
7	1.30032				-0.978319	-1.17187	-0.737541			0.147708	0.470324	0.223699	-1.23105	0.212926			-1.18095	-0.269633	-0.619432	-0.845701	-0.212089	-0.488208						1.53542
720	0.118897	-0.931197	0.941822	1.0236	1.56487	1.96883	0.376172	-0.436269	-0.436269	0.271039	0.44143	0.627741	-0.375239	0.347652	-0.293402	-0.34052	-0.124143	0.765477	0.353092	-0.473244	1.72701	0.843867	-0.179589	1.61484	-1.16975	-0.474053	1.35357	0.617087	-0.114057	0.0640342	0.40095	-1.19201	1.17542	-1.42502	-0.211832	1.23668	0.849429	1.00831	0.444012	-0.11096	-1.19978	0.425138	-1.11005	0.396653	0.952366	0.811702	0.402412	0.355293	-0.565812
737	-0.416625	0.396453	-0.207104	-0.682979	-0.263503	0.55938	0.15381	0.758932	0.605443	0.387571	0.183472	-0.60145	-0.313218	0.388792	0.224301	0.0458744	0.335321	-0.316508	0.37921	0.323963	-0.746918	-0.107021	0.166495	0.217103	0.409094	0.565607	-0.583898	0.282175	0.0887747	-0.491297	-0.298191	-0.664318	-0.59008	0.312029	0.185249	-0.599534	-0.16216	0.0925433	-0.462563	-0.598997	-0.441488	-0.847331	-0.871896	-0.249211	-0.510923	-0.382333	0.269585	1.05276	0.54336
738	-0.155808	0.544833	-0.248954	0.422769	-0.164332	0.591486	0.188348	0.293563	-0.0718363	0.278395	0.00657573	-0.639261	-0.661106	0.447316	-0.0395886	-0.134175	-0.080655	0.115467	0.267623	-0.279409	-0.827385	-0.0203155	0.29389	-0.235913	-0.688615	-0.950486	1.67552	-0.130079	0.214677	-0.524745	0.000568476	-0.813788	0.525097	0.0902645	0.175755	-0.399714	0.578396	-0.0851823	1.36145	0.183605	-0.579233	-0.689726	0.430239	-0.068434	0.422958	-0.256691	-1.65883	0.287395	0.529192
745	-0.361786	-0.47344	0.658939	1.21557	0.806088	-1.04271	0.0608296	0.170262	0.170262	-0.0336921	0.227807	0.377637	-0.318757	-0.550654	0.12514	0.0488075	0.594747	0.47488	-1.28388	-1.43214	0.771157	0.435276	-0.527656	0.134389	0.584609	0.819046	0.774954	0.331194	0.353549	0.303771	0.162152	0.505928	-0.962051	0.0266866	0.24954	0.145519	0.0917705	0.178475	0.402193	0.0838121	-0.761156	-0.370498	-1.55331	-0.550343	-0.249841	0.400892	0.375351	-0.604511	-0.494355
7506	0.472318				-1.31586	3.34563	2.31148			0.980502	1.49057	-4.71471	-0.855081	-0.344755			-0.36065	1.75916	0.556913	-1.34065	-0.0288146	1.88239						1.59529
7507	0.32444				-0.823945	0.60132	0.821858			-0.281498	0.136273	-1.83199	-0.924367	-0.597907			-1.01938	0.361783	0.588595	-0.876651	-0.507188	-0.302617						0.927673
767	-0.15532	0.851449	0.250057	0.443482	0.184095	-0.666531	-0.0742017	-0.527633	-0.0998669	-0.40998	-0.222633	-0.53608	0.274902	-0.353831	-0.295053	-0.35098	-0.670757	-0.138349	-0.290135	-0.148964	0.357621	-0.196987	-0.47039	0.000997892	-0.298982	0.234273	-0.402717	-0.241549	0.0818164	-0.174726	0.243811	-0.758265	0.333054	-0.168251	-0.259212	0.362018	0.683412	0.394975	0.537125	0.0675639	0.963005	-0.449441	-0.542206	-0.038558	1.01083	0.769147	0.285008	0.107649	0.258425
7767	0.186674				-0.771104	-1.74417	-1.12526			-0.000205078	0.248603	-0.545995	-0.974467	-1.48425			-0.521794	-0.00634132	-0.381278	-0.457517	-0.169256	-0.211173						0.84155
778	0.25828	1.39787	0.636661	-1.00935	0.455658	-0.435338	-0.613231	-0.308909	-0.308909	0.146196	-0.317074	-0.642472	-0.0536991	-0.429348	-0.213411	-0.153086	0.451481	0.0835013	0.577142	0.833517	1.19709	0.241053	0.439294	1.5811	-0.324626	-1.28518	0.819806	1.03265	0.43924	1.33137	0.648644	-1.01012	-0.336228	-0.0507412	0.508763	0.579362	0.64638	0.777535	0.293203	0.155665	0.662961	-0.412	1.05461	0.789848	-1.39261	-0.399523	-1.36348	0.826909	-0.623174
780	-0.145558	-0.655785	0.235232	-0.361884	0.215501	0.835023	-0.0722158	-0.377693	-0.377693	-0.38328	0.108292	-0.968916	0.104693	-0.222452	-0.148787	-0.242174	0.0949741	-0.193143	-0.317655	-0.206288	-1.34681	-0.0512033	0.803585	0.284134	-0.545076	-0.423496	-0.762193	-0.2196	0.448793	-0.0369368	-0.0407238	1.17523	-0.226086	0.108911	-0.994626	0.794564	-1.65491	-1.42044	-1.50474	-0.171369	0.812829	0.264908	-0.505673	0.12063	0.530885	0.395921	-0.354253	0.189118	0.528636
781	-0.458891	-0.891587	-0.708983	-0.378124	0.900796	0.682427	0.688127	0.34106	0.34106	0.301896	0.274901	-0.286243	-0.290615	-0.250723	0.155081	0.271121	0.655363	0.318442	0.385829	0.253917	1.34533	0.364915	0.243979	0.256234	0.413961	-0.840708	1.30555	1.4768	0.505006	1.61155	1.88188	-0.935078	-0.535895	0.530316	0.0395545	-0.964817	0.0616274	-0.796891	-0.378807	0.669377	-0.823783	0.441225	-0.541498	0.591493	0.957112	-0.945568	-0.916672	1.2797	0.109338
784	-0.214625	-1.18379	-1.2527	-1.15918	2.03348	0.416839	0.66274	0.62829	-0.147722	0.193832	0	0.709225	0.179801	-2.09828	0.371047	0	0.876311	0.0268472	-0.317188	0.357101	0.990039	0.322147	2.24118	-0.696655	0.237488	-0.830788	-2.86389	1.78216	1.46296	1.63644	1.18284	1.89155	0.401	-0.721647	1.03723	0.31364	1.14287	0.845947	1.94685	0.157339	0.392057	-1.5917	0.681602	-0.143933	0.9478	-1.09805	0.68751	0.44924	-0.304511
79	0.0817783	1.01683	0.167562	0.405865	0.392247	0.553761	-0.0766171	-0.297316	-0.297316	-0.216109	0.0700027	-0.635311	0.25766	-0.346263	0.0755852	-0.143152	-0.175747	0.23975	0.448586	-1.25891	1.18259	0.308857	0.305446	-0.579423	-0.662133	-0.41735	-0.305038	1.15645	0.504685	0.658585	0.474114	0.333251	-0.740177	0.324184	-0.175301	0.304507	-0.299765	-0.128767	-0.134398	-0.226838	1.81792	-0.710247	-0.762068	-0.564601	0.55825	0.765986	-0.221562	-0.586014	-0.924538
808	-0.0551551	-0.726016	-0.414527	0.686233	-0.304055	-1.01031	-0.0722122	-0.271923	-0.271923	-0.0710613	0.0222097	1.6094	0.305485	0.246632	-0.0801656	-0.134808	0.119559	0.423655	1.51623	-0.232932	0.600926	0.61857	-1.62921	0.657578	-0.74293	0.513923	-0.500848	-0.240712	-0.657099	-0.432384	-0.742147	-1.38435	0.144768	1.17326	-0.0396814	-1.01108	0.529123	-0.815977	0.582583	-0.114152	0.900546	-0.284982	-0.442542	0.171881	0.451764	-0.491024	1.0764	0.357759	-0.885915
819	-0.209775	-0.658518	0.274695	-0.291476	-0.459511	0.447209	-0.450009	0.456347	0	0.1351	0.000475219	0.469285	-0.0960861	0.381383	0.283207	0.0520706	-0.563656	-0.190118	0.457433	0.657696	-1.05519	0.0340404	0.275101	-0.824422	0.436769	1.335	0.425379	-0.238265	-1.76795	-0.233961	-0.684538	0.844953	0.403945	-0.125613	0	-0.570052	-1.1976	-1.47435	-0.133754	-0.544168	-0.405908	0.60685	0.323738	-0.523239	-0.353937	-0.415481	0.146864	0.624855	0.145977
86	0.00931434	0.70528	-0.206726	0.341062	0.347324	1.14454	0.29757	-0.090996	-0.0721343	0.216393	0.166875	0.547485	0.251934	-0.122717	0.0842229	0.135815	0.0944318	0.209064	-0.278379	-0.383907	0.178134	0.0897557	-0.155434	0.353409	-0.551117	0.133847	0.585454	0.388914	-0.125981	-0.0277887	0.778752	-0.236124	-0.791553	-0.498697	-0.278038	-0.609366	0.65917	0.0906204	0.839225	0.0240286	-0.256516	-0.471856	0.466122	0.0139198	0.126653	0.143917	-0.231299	-0.680758	0.273636
87	-0.445029	2.3687	-0.731855	0.995565	-0.598022	1.13232	-0.822856	-0.103188	-0.103188	0.0817327	-0.452094	-1.91165	-0.222654	-0.217749	-0.0455989	-0.0773382	-0.228558	-0.469844	0.162124	-1.52023	-1.09585	-0.978582	-1.50579	1.36399	0.329083	-0.913105	-1.82822	-0.723326	-0.263448	-0.611643	-0.519743	-3.17441	-1.25769	1.26617	-0.0021829	-0.366198	-0.819111	0.317552	-0.225391	-0.0228932	-1.14383	0.935173	-1.98648	0.120541	-0.945903	0.326243	-0.775889	-0.55761	0.6999
90	0.178527	-0.379776	0.373124	0.780615	0.316364	0.935776	-0.106936	0.114075	-0.0441339	0.0969648	-0.326049	-0.866983	0.189235	-0.144158	-0.0198944	-0.00753281	0.506842	0.0654414	-0.371164	0.618217	0.60017	0.149257	0.661231	0.26176	0.426137	0.450504	0.325121	-0.192145	0.157801	0.153968	0.342554	-0.610119	-0.441835	-0.31989	0.312243	-0.394993	0.463192	0.470453	0.211419	-0.205631	0.313667	0.736991	-0.714292	0.183173	-0.826787	-0.337413	-0.27958	0.0823773	-0.0617472
900	-0.209402	-2.04237	-0.68918	0.270259	0.313754	-0.166967	0.229413	0.0621628	0.0621628	-0.0936332	0.163131	-0.301922	0.11353	-0.25285	-0.0136152	-0.270989	0.28321	0.378076	0.539051	0.446188	0.97337	0.214816	-0.318755	-0.103065	-2.34748	0.667561	0.372034	0.333952	0.416399	-0.000207868	-0.323948	0.79723	0.439937	0.383509	-1.22214	0.30349	-1.82851	-1.1911	-0.937559	0.482537	0.540617	0.601909	0.857004	0.215447	0.807156	-0.4892	1.09743	-0.271514	-0.29128
917	-0.213297	-0.795291	-0.603954	-0.348212	0.698228	-2.16087	0.00175874	-0.502784	-0.502784	-0.0374178	-0.0770188	-1.98961	0.0963392	-1.01662	0.000226633	-0.0987705	-0.521155	-0.0974394	-0.600162	-0.870758	-0.450445	0.0437884	1.11899	-0.808051	0.560397	-0.0971332	0.338574	-0.757283	0.0770554	-0.0865518	0.472741	-1.16378	-0.865444	-0.264548	-0.010498	0.239011	0.615533	0.418376	0.814244	0.383444	-1.22463	0.567706	1.06418	0.234055	-0.920194	-0.583695	-0.63985	1.56672	1.36523
93	-0.513166	1.46552	-0.685238	-0.555629	0.557576	-0.396123	-0.370534	0.239521	0.239521	0.726084	0.435813	-0.487775	-0.86699	0.735645	-0.154308	-0.201663	0.456515	0.412429	0.809335	0.721578	0.737814	0.256563	1.7384	0.459566	-1.01902	0.108084	-0.12643	0.568813	0.0328925	-0.0735145	0.0611351	1.66735	0.639089	0.51658	1.14143	0.240781	1.56603	0.533076	1.06867	-0.140615	-1.0747	1.47248	-0.58069	0.0702753	-1.09921	0.604057	-0.480768	-0.531787	0.331309
934	0.322757	1.17152	-0.530468	1.61086	0.831143	0.245072	-0.019877	0.618059	0.618059	-0.406719	0.26669	-0.586267	0.49456	0.693312	0.212237	0.203556	-0.440299	0.69241	-0.308829	-0.616342	0.817021	0.5751	-0.58657	0.434533	0.595724	0.131645	-0.284907	0.241535	0.0455239	1.55142	0.424886	-0.927538	-0.513031	-0.807549	0.0548005	0.769845	1.02081	0.806003	0.591798	0.354701	0.493942	-0.454275	-1.61339	-0.253542	0.757384	0.572501	0.365728	-0.828538	-0.53779
942	-0.114094	1.44317	-0.390673	-1.38164	0.355297	0.781351	-0.264873	0.468899	0.202551	0.297329	-0.0543	-1.32986	-0.284607	0.420626	-0.0969883	0.0256024	-0.0252101	-0.173838	0.775983	0.732185	-1.70576	-0.309756	-1.29253	-1.19834	0.138773	-1.21905	0.804698	1.56026	-0.510516	1.08111	2.40145	2.55624	-2.10184	-0.180613	0.599666	0.445673	2.01764	1.78897	1.61892	0.464497	0.807127	1.14155	1.03918	0.932895	-0.295139	0.957493	-0.190061	0.399804	0.715163
965	-0.553292	-2.24559	0.335132	-0.311153	-0.817932	0.888716	-0.150635			-0.339525	-0.0369147	-4.95154	0.748837	-4.39982			0.0489648	-0.246309	-0.538663	1.96929	1.16644	-0.0694511	-2.0193	0.10046	-8.23723	0.780664	-0.921787	0.302142	0.192329	0.308679	0.424341	1.89307	-0.621479	0.926198	-2.74801	-0.967318	-5.37985	-4.38217	-3.76628	-1.63588	-1.16547	0.397864	-0.188536	-0.0303216	1.17185	0.756368	1.56688	-1.89927	-0.167268
974	0.294709	-1.44616	-0.355093	-0.205068	-0.139759	-0.521546	-0.795508	-1.07033	-0.337782	-0.0554645	-0.057721	-0.41348	0.433754	-0.428243	-0.455502	-0.204717	-0.0440424	-0.275941	0.388792	-0.468267	0.591315	-0.335016	22.563	1.1418	-0.476884	0.230464	0.334558	0.724837	-0.424255	0.528492	0.217465	1.60396	0.608579	-0.27578	0.364081	0.717062	-0.377193	-0.591127	-0.148814	0.187976	0.517014	-0.378858	-0.414085	0.296255	0.884914	0.616603	-0.437737	0.227756	-0.465112
989	-4.05791	-4.15881	2.99448	-2.01711	-5.11973	1.27641	0.384103	2.17996	2.17996	2.60363	1.29537	-2.0662	-2.01378	3.2671	0.75717	1.6989	2.88499	1.72883	-7.15393	-12.4046	-3.88722	1.55235	21.0832	-2.76468	5.35061	-1.80097	-12.3347	3.01155	-5.57457	1.98144	0.0522602	5.91541	-5.06826	1.98837	6.32134	2.66538	6.83359	3.24197	4.30619	-1.49534	-3.69357	2.54503	8.25683	1.01474	6.38781	-5.36044	-9.36305	-0.998359	2.97909
993	-0.668347				-0.657949	-2.16974	-0.105144			0.974353	0.501022	-1.55385	-1.61871	-0.425969			-0.717526	-0.673868	0.46958	-0.855709	1.31367	-0.754035						1.03034
996	-0.216158	1.706	-0.396125	-0.528928	0.511812	-1.09029	-1.23926	-0.545313	-0.545313	0.0652594	0.108629	0.666598	-0.460751	-0.485001	0.0130445	-0.15979	-0.13109	-0.986867	0.747619	0.83343	0.716924	-0.904567	-0.117835	-0.356048	0.498492	-0.0288136	-0.469089	-0.388308	-0.015959	1.08333	0.790494	1.29892	0.370361	-0.0174516	-0.116997	0.413876	-0.368381	-0.0138049	0.532728	0.984396	2.44184	1.70185	-0.882512	0.313094	2.74363	0.150118	0.887586	0.288738	-0.615013
972	0	-0.313318	-0.162868	-0.770972	0.568084	0.468255	0.772076	-0.19022	-0.19022	-0.058342	-0.237321	-0.619141	0	-0.41843	-0.0958714	-0.043828	-0.0878892	0.0838507	1.57705	0.547736	0.528321	0.362206	1.42223	0.977094	-0.394681	-0.142337	0.411661	-0.568784	-0.310977	-0.417957	0.0338968	-3.57497	0.7068	-0.29747	-1.23795	-0.304965	-3.73836	-1.51897	-3.85319	-0.24198	-0.830222	-0.714625	-0.625296	0.454141	1.80326	0.201805	0.977648	-0.141458	-0.102634
SPAC105.02c	0.745863	9.72377	1.93617	3.43022	1.99551	1.65943	5.50928	1.16171	1.16171	-0.289075	-0.447741	-1.51922	-0.411257	1.57116	0.227712	0.338182	-0.747842	0.474505	4.32767	4.9651	3.62922	0.171325	1.55023	-2.72026	-2.24695	-1.91313	-5.26972	-0.66585	-0.840004	-1.11432	-0.186274	-14.4821	1.00005	-1.67214	-1.11624	-0.865426	-1.78228	0.365858	-1.20345	0.237761	-3.32813	-1.64921	0.625062	0.576504	3.24423	0.763503	0.225316	0.587943	1.25195
SPAC1071.07c	-3.55392	-3.62793	2.28859	4.87202	-4.17966	2.69528	-0.808548	-2.12437	-2.12437	-1.06479	-1.57477	-7.99531	-3.57347	-0.266056	-0.212725	0.102291	0.598014	-2.47059	-5.51185	-17.976	-5.03656	-2.4713	-18.9224	-7.712	4.89555	0.720008	-12.9684	-1.11231	1.10268	0.147706	0.0591926	-3.50421	-2.70139	6.33344	-6.84328	0.760981	-10.1536	-5.08621	-7.02986	-5.60287	2.51668	2.05003	-15.1092	0.853837	-11.745	2.23202	-6.77047	-1.32303	5.45945
SPAC1071.09c	0.135487	-1.11134	1.14752	2.18975	0.862617	-3.40437	-1.27535	0.685741	0.685741	-0.0473662	-0.321392	-0.555868	0.930034	-1.43302	0.416541	0.232984	0.385616	0.91595	2.38405	-4.10193	2.70184	0.547427	0.460204	0.604008	-1.33707	1.02875	-4.18855	0.866948	0.487105	-0.0833647	-0.330245	-8.28454	1.24889	-0.779595	-2.45264	1.96014	-5.68019	-6.24276	-4.12247	0.304694	3.14838	1.5735	-3.02937	-2.34159	-8.86123	1.5393	-0.966992	-0.912758	-1.10477
SPAC10F6.14c	-1.07252	2.09236	1.23125	1.07213	-2.44353	-3.60544	-1.08727	1.36503	0.566827	0.491134	-0.285668	0.792513	-0.530637	-0.690074	0.553793	0.468725	0.783167	0.569857	-9.73481	2.68517	-2.12301	0.82857	-0.619668	0.751507	0.828727	0.439129	3.25847	0.603085	1.04244	0.525991	0.152321	-1.36871	-1.3745	-0.202199	1.40353	-1.06017	0.64583	1.19525	0.25171	-1.87608	-1.68402	-2.98917	3.08803	0.988102	2.02471	-1.35583	-2.96447	2.5291	-0.514631
SPAC11E3.12	1.42443	-1.31286	1.62753	2.19628	0.990785	1.29845	0.0960567	-0.516726	0.0588438	0.234765	0.925631	2.66472	1.47442	-0.943927	-0.742673	-0.163	0.252308	0.661454	0.495146	-0.272148	2.22277	0.0414749	0.761678	0.746045	-1.0566	-1.16271	-0.992254	-3.30985	1.10526	-2.98783	-2.25441	0.720267	1.29175	0.241612	1.24746	1.36957	2.13455	0.754716	1.93593	2.63878	2.03469	3.48357	-4.49185	0.84284	3.11477	-1.92057	-1.64269	-0.053605	1.14508
SPAC12G12.11c	-0.119181	-2.01462	-0.576245	-1.01424	1.36275	-2.93358	-0.944367	-0.731803	-0.731803	-0.371183	-0.272264	-4.30906	-0.749306	0.488714	0.293035	-0.557693	-0.0404398	0.124528	0.241855	1.37993	0.619893	0.486742	1.51494	-0.551909	1.45042	-1.13138	-2.71552	0.33182	-0.777227	1.34432	0.895661	-2.24444	-0.715278	0.417449	-0.62068	-0.341988	-3.7957	-2.14315	-5.54982	-0.449271	-2.27587	-0.950898	0.607031	1.0071	1.29404	-0.271145	-0.892258	-0.582829	-0.52449
SPAC13A11.06	1.03918	1.11258	-0.730294	2.15437	0.390253	0.864652		0.285145	-0.121673	-0.185854	-0.711888	-0.549148	0.787616	0.382002	0.161746	-0.00102042	0.464143	-0.776146	-0.924106	0.866907	0.96492	-0.718336	0.34165	2.20813	-0.738503	-0.325061	1.77428	1.61238	-0.517463	1.26402	1.45832	2.60584	-0.229909	-0.105329	-0.151069	0.81783	0.787275	0.775289	0.288053	0.17562	1.2438	-1.18899	-0.527741	-0.111191	1.02043	-1.37161	0.888525	-0.714213	-0.736774
SPAC13F5.03c	-0.389437	-3.68281	-2.37486	2.59309	1.01316	1.96712	0.34552	-2.10368	-2.10368	-0.562963	-0.200061	-3.05652	-0.937026	-0.596427	-0.595701	-0.145847	-0.460943	-0.190998	-0.716215	-4.42082	-1.90943	-0.88888	2.26321	0.270965	0.091798	-5.97682	-2.06125	-1.06193	0.842331	-0.841716	-1.635	-6.80245	-1.17767	-0.119836	1.02101	1.1246	1.15768	0.930485	0.0932635	-1.39415	-0.765049	2.39428	-1.40302	-0.769527	5.04927	0.775164	-3.07605	-0.966367	1.12761
SPAC13F5.04c	-0.169866	1.15884	0.730699	-2.62671	-1.24744	-1.22957	-2.3398	-0.446244	0.185306	-0.204598	0.283446	0.657518	0.31865	-1.07997	-0.83772	-0.353582	-0.611851	-0.246887	0.923238	2.24279	-1.06261	-0.381872	-3.19975	-3.37031	-2.51375	1.08797	1.35047	-2.52239	0.97511	-0.888247	-2.22313	-3.1872	-0.959169	1.58738	0.831079	1.08686	-2.78482	-1.66801	-4.58721	-0.20328	-0.967691	0.328253	-6.71698	-1.54119	-3.43587	-0.444742	-0.287548	-1.21345	-2.18765
SPAC140.01	0.869138	3.49897	1.14442	4.26782	2.79411	-5.32633	0.935244	-9.00089	-6.67477	-4.12803	-0.159953	1.80472	-0.300351	-2.70293	-3.62478	-1.35844	-0.109572	3.46977	3.07593	8.06061	5.32293	3.78562	3.94525	0.114373	1.68481	2.7281	7.51153	-1.83504	-0.665984	-2.71607	-1.68547	15.1376	-3.33144	-2.1631	-1.5223	1.92635	-1.95422	-1.81524	-3.21292	-12.761	4.77129	1.39784	4.4896	1.54191	9.99298	-1.08033	2.67254	1.77773	3.4205
SPAC1556.02c	-0.321939	3.57713	1.98452	-0.875195	-0.257873	-4.39937	-0.182782	-9.5454	-8.43887	-4.71891	-1.46384	1.97618	-1.66786	-2.35411	-3.13204	-1.23515	-0.0858182	0.811234	3.18841	3.89124	3.94857	0.753013	0.315893	0.169228	1.61261	5.09467	6.984	-2.25292	-0.432448	-2.47634	-1.45929	17.3154	-3.47688	-2.19615	-1.41507	2.89919	3.20043	-0.0633478	2.67699	-12.6254	95.9058	2.16865	4.22525	0.827191	6.82108	-0.938786	-2.97935	-0.792959	5.85112
SPAC15A10.10	0.353637	-0.533044	1.4096	0.970801	1.24195	-0.892862	-1.61815	0.685849	0.685849	0.834362	1.06792	-2.35191	-0.393556	1.27458	-0.168567	0.538227	1.40138	0.542772	1.07296	1.27651	0.625257	0.972624	0.942783	-3.59674	0.888677	1.47169	1.28078	0.550758	-0.0663603	0.0688961	0.784216	-0.627358	1.29307	1.33248	2.96135	1.58442	1.84418	-0.0797584	2.20744	0.454988	0.783792	2.80411	-0.708696	0.0904742	2.13378	-1.96327	0.440871	-0.64577	-0.851819
SPAC16.01	-0.300361	-6.72877	1.46971	3.41392	0.52842	1.41675	1.1961	-0.888209	-0.250246	-0.276109	-0.129537	9.74724	-0.53642	-1.71394	-0.314301	-0.085943	0.0739484	2.84558	-1.97367	-3.78115	2.18727	3.2815	-0.195777	-8.93409	-13.6771	-8.05481	6.16407	-1.67697	0.00678519	-1.5965	-0.598646	-1.0099	-0.493146	-0.116865	-0.288003	-1.85343	3.3018	-1.40583	3.3486	1.02552	10.5413	1.16707	-3.67468	1.29103	-2.22023	-2.4074	-0.299358	4.51021	-11.8027
SPAC1610.02c	-0.758136	-6.51908	1.79595	-4.73906	-2.84004	-0.763152	-5.2297	-1.32419	-1.32419	-0.166635	0.0782098	-6.18435	-1.24479	2.37596	-0.54669	-1.16379	-1.13962	-0.443662	-6.33692	-18.7758	-7.45057	-0.886108	-18.4737	-11.8564	-3.72307	0.896971	-12.6099	-2.96921	2.47047	-1.57637	-2.47612	-3.0747	-2.46747	5.3245	-7.99711	-0.780261	-19.9727	-11.643	-8.15659	-8.59101	4.74217	2.26161	-13.4902	0.00222117	-5.03523	2.03469	-2.57646	-3.11162	4.73714
SPAC1687.14c	0.759654	-2.07167	-0.891664	0.771658	-0.905089	1.32852	-0.98917	-0.767484	-0.399768	-0.723519	-0.105141	-1.27459	0.516631	-0.464537	-0.207052	0.0847547	-1.51482	-0.143261	-0.568442	-1.03429	0.726659	-0.0437042	4.33047	-0.0363725	1.2271	-2.41165	-0.573705	-0.524047	-0.458897	-0.318756	-0.1956	-2.81484	0.871713	-0.215557	-1.92087	-0.892349	-5.85863	-4.5785	-6.04173	-0.646294	0.680812	0.957495	-1.66393	-0.30714	1.26025	-0.612896	-0.661393	1.27369	-1.84427
SPAC1687.15	0.787406	5.11966	0.894954	-3.80514	-0.707569	-2.04751	14.9911	1.46754	1.46754	1.37763	-0.549503	-2.68215	-0.155518	0.394247	0.191059	0.825567	0.661684	0.395944	-0.530408	-4.2855	-2.72271	-0.0333871	-4.81037	-11.8193	-19.9522	4.97724	-8.96833	1.15221	-0.725952	0.903175	0.693654	3.37833	-1.47056	1.62313	2.02381	-0.70914	0.69874	1.69408	0.788798	-1.0127	-1.49922	-1.26599	-4.12691	-2.16504	-1.45853	1.25764	-1.53187	3.47907	1.2751
SPAC16E8.01	-3.43312	-11.6822	1.30662	3.79651	1.80096	1.23999	0.934931	1.53272	1.53272	1.44922	2.00222	-1.68682	-3.84684	1.46342	0.717973	1.32279	0.913791	1.52955	0.690831	-5.08625	1.41419	0.90288	-2.94705	-16.8651	-17.4258	-6.06849	-4.16483	-3.88162	2.35187	-3.46422	-2.27915	-25.1343	1.76773	-1.16483	0.556223	1.90205	0.188293	2.647	-1.63036	1.67128	-3.98956	-0.832762	-1.37067	0.0226545	-3.16136	-3.00137	-7.05078	2.10717	-0.941731
SPAC1705.02	1.62844	1.94505	-0.824358	1.70851	1.4465	-0.700129	-0.0155173	0.369104	0.369104	-0.591082	-1.14448	1.72078	1.29569	1.68918	0.142003	0.0513725	-0.153898	0.104965	1.43216	-2.43647	4.00005	-0.077166	-1.27345	3.95138	1.44077	-0.32802	3.23416	-0.534169	0.252511	-0.576599	-0.0931112	4.37667	3.71346	-2.79191	1.17003	0.443983	-1.13889	-0.879765	-1.12708	-0.350524	2.09584	-0.944372	0.880617	0.60426	6.83232	1.01224	2.92628	-2.35314	0.395891
SPAC17A2.02c	-2.24537	3.52164	-3.08472	2.20728	-0.392946	0.876231	-3.01336	-1.24926	-1.24926	-2.05163	-0.115767	2.03895	-2.7006	0.637126	-0.0209011	0.0771399	-0.213314	-0.764182	0.660881	3.41388	3.62284	-0.186057	20.002	-8.00017	1.8843	5.75664	5.342	-1.69666	1.60505	0.427412	-0.515425	-4.64008	-2.47334	2.35823	5.51428	1.35746	3.40011	2.46356	3.05858	-3.47534	1.6511	1.42698	4.06817	-0.758988	4.92848	1.65511	-0.979495	0.935703	-3.3899
SPAC17A5.16	-0.533425	4.35215	-1.37487	-5.77175	0.95753	0.830041	30.5271	3.45002	3.45002	1.7112	-1.85481	-6.55459	-1.05361	2.19188	1.71079	2.2091	0.661102	-1.33262	-3.37598	-2.20857	-3.48857	-1.51339	2.16628	4.54778	-4.70023	-2.77723	-2.46298	-3.15925	1.01411	0.274308	0.511272	14.6606	1.43614	-0.930383	0.0505425	-2.89312	1.20014	1.70712	3.15361	0.270792	-5.66758	-1.64969	-1.46018	3.75875	9.62565	-1.3452	-1.10246	-0.533564	6.72544
SPAC17H9.04c	-1.39402	7.20854	-0.451097	1.45663	-0.729557	-3.65199	0.264121	5.92958	4.82476	3.29683	0.230454	-2.89299	-3.09841	2.23198	2.52413	0.99597	0.33992	0.272889	-0.708713	-2.31764	4.85044	-0.613233	2.5277	0.984209	5.88393	-11.8401	9.28254	-3.92739	-0.000130738	-4.29033	-3.47899	-11.299	2.87632	-0.603762	-6.84851	0.949974	-10.5071	-5.52813	-7.2525	1.65513	6.789	-1.90459	-10.1608	0.968591	-15.1454	-1.47176	1.84421	-3.28092	-6.45918
SPAC17H9.06c	0.230477	0.64968	-0.754822	-0.638918	-1.04061	-0.892162	-0.595411	-0.367175	-0.00384165	-0.110782	0.0848305	-0.370219	-0.71403	-0.581839	0.19987	-0.0356697	-0.872324	-0.39378	0.565604	-0.48142	0.652631	-0.34015	2.59826	0.253302	0.791933	0.99085	0.659793	-0.29166	-0.890417	-0.179687	-0.656252	0.467372	2.04832	-0.597678	1.75135	0.591291	1.65645	-0.037109	-0.286445	-0.329284	-1.32674	2.29114	1.94986	0.113908	2.58501	-0.381316	1.24238	-0.476499	-0.324711
SPAC1805.07c	-3.52605	-2.64578	-1.27908	1.99953	2.11686	1.96276	0.449018	2.31283	1.84992	1.76628	-0.78447	-8.80288	-2.06605	1.85154	1.76908	0.301495	1.45663	-0.384482	-7.79921	-20.513	-2.48968	-0.369789	3.35373	-18.4658	-14.869	-4.0579	-11.6768	2.14657	3.63348	-1.00995	0.391416	-5.17727	3.485	2.32532	-7.25593	2.37614	-10.618	-8.03298	-8.71604	2.78129	2.72439	2.25181	1.83267	0.470059	-16.4991	2.49558	-0.758194	-1.52046	5.20675
SPAC1834.04	0.799901	-1.27311	0.796633	-4.0035	3.42666	3.12729	1.2323	0.383883	0.0651831	-0.200778	0.203938	5.76796	0.598615	1.07486	0.588822	0.889119	0.587345	0.197879	0.953156	-2.26383	5.66849	-0.198211	1.75031	-1.20284	-6.60378	2.8873	1.52158	1.00209	-0.0173729	-0.698595	0.787929	-3.24642	2.23341	-3.90957	-2.13465	-0.416839	-4.87173	-1.43752	-4.3551	1.51782	5.13414	-2.23135	-2.09985	0.266931	-3.01489	-1.43979	0.900257	-1.25056	2.11482
SPAC1834.09	0.283017	0.693506	0.5958	0.485098	-1.29247	-4.34632	-0.152229	-0.673858	-0.210917	-0.211054	0.223617	0.954599	-0.285906	-0.366886	-0.597662	0.0811848	-0.354554	-0.0944252	0.303194	1.2458	-3.49155	-0.209281	-1.31111	-1.13757	-0.933326	-0.652898	0.78362	-0.842723	1.60077	0.09794	-1.01974	-2.18015	-0.73695	-0.664578	-4.42928	-1.91415	-8.38151	-5.27128	-6.67996	-1.56884	-1.06628	-1.30431	0.679878	-1.6358	1.1013	-1.12158	1.20553	-0.586287	-0.68443
SPAC186.06	-0.235504	1.72355	-0.608887	1.71028	-0.345706	0.351486	0.899565	-0.733558	-0.601659	-0.596734	-0.237781	-1.08697	-0.341761	0.216538	-0.274476	-0.538096	-1.26003	0.125007	0.726333	0.538792	0.594028	-0.056765	-0.199566	0.330183	0.0966204	0.95588	-0.701434	-0.489291	-1.28474	-0.408858	-0.0775146	-0.92657	1.01067	-0.603351	-0.566902	1.00019	1.20025	0.902516	0.344309	0.274721	1.1811	-0.749761	1.07622	0.555201	1.12498	0.20259	1.46493	-0.647013	-0.523996
SPAC18B11.04	0.198346	1.38967	-0.581981	2.02241	-0.416167	-0.718725	2.64155	-0.747158	-0.747158	-0.268797	-0.065466	4.51928	0.325458	0.341238	-0.115376	0.138869	0.0170944	0.366469	0.374388	-2.04184	-4.1862	0.28389	-18.9537	-8.99901	-3.69205	1.08866	2.70348	2.67657	0.627782	2.21628	2.1346	9.00456	-1.08863	-1.13642	-0.454845	0.695611	-1.30546	-0.441767	1.06049	0.539494	3.94516	0.809992	2.44618	2.24174	0.905836	-0.434724	-0.769575	-1.27357	-0.557241
SPAC19B12.07c	-0.096729	2.59733	-2.06008	1.3518	1.24085	-0.530507	0.745355	0.940033	0.940033	0.868012	0.37708	0.663977	-0.223885	0.477235	0.191533	-0.0927672	0.466633	0.156234	1.6683	4.05778	1.93517	0.44871	4.40851	3.15398	3.74997	0.836994	1.80466	0.648248	0.764203	-0.0933718	-0.673183	-1.89108	2.7135	0.139664	1.23762	0.873312	1.75538	1.97556	2.8883	0.361992	-1.47403	1.49484	2.8877	-0.691529	1.78592	1.17821	3.59861	-0.422678	0.948472
SPAC19G12.15c	-6.7849	3.4997	-5.57775	-3.84248	-3.59976	-4.49954	24.9554	4.84824	4.84824	3.80927	3.77983	9.81998	-7.17755	3.70459	1.32722	2.64156	5.8104	3.40239	-12.9277	-12.9659	-16.6743	3.3492	-17.3046	-15.5718	-21.5654	2.46879	-10.4225	-4.80195	8.83523	-4.60354	-1.34375	12.1092	3.52039	4.80882	-1.70696	5.40242	2.61453	1.01151	5.04717	-13.195	3.41448	15.3446	8.41484	2.80983	-19.0358	-10.6549	-6.10718	7.95878	13.3874
SPAC1A6.04c	-1.08756	4.73753	2.10318	-2.65501	1.56871	-1.26296	7.84262	-5.03227	-5.03227	-1.74108	0.593136	4.94663	-2.29492	-1.12627	-1.74764	-1.49946	-1.12194	1.50171	-1.60928	-5.17455	-2.32432	3.2481	-14.6334		-32.9957	2.05432	-7.16007	-4.13693	0.186586	-5.67951	-3.85995	-5.01676	1.06937	0.341588	-0.126375	-1.30165	-2.53279	-3.79641	-0.595241	-5.64235	4.15102	2.70141	-2.15183	-0.311384	-2.64776	-2.66557	2.03181	3.00549	3.92768
SPAC1B9.02c	0.213023	3.7854	-1.62565	-5.33164	-0.339536	-2.34618	3.23058	-2.46719	-0.686188	-0.520381	-0.294779	-1.49939	-0.784749	-1.04189	-1.37853	-0.111848	-0.750383	-0.477561	-5.3135	-2.18012	-3.85947	-0.427873	1.24237	-0.828766	-4.9802	0.663209	-7.51884	-4.19697	-2.55546	-5.9516	-3.6797	-2.59066	-0.775687	0.89826	0.253663	0.526374	-1.94352	-2.10914	-1.8845	-3.77849	-2.24751	-0.555533	1.13948	-0.748784	-6.58777	-0.777373	0.831449	1.26613	-0.836602
SPAC1D4.03c	-0.647726	-21.003	-2.77593	-3.34217	-1.00195	1.90655	-0.900631	-0.85633	-0.85633	0.0499704	-0.250143	-23.6387	-0.583862	-0.332375	0.0358753	-0.329315	0.59114	0.724318	2.92583	-7.70044	-4.51259	1.09089	-7.09436	-9.19632	-14.3153	-3.88629	1.95848	-4.41709	-1.45709	-1.55145	-2.42812	2.92955	1.41797	-1.03143	-3.02418	-0.483189	-3.21256	-2.49607	-2.29036	1.7481	3.32816	-2.96075	2.35538	-2.37169	2.70926	1.56302	-2.29993	-0.578015	-3.04459
SPAC1F3.09	-0.208915	-0.819187	-0.186035	-0.785223	1.55567	-1.32364	0.657656	-0.100353	0.0077377	0.163097	-0.241542	1.27907	-0.793601	0.481786	-0.466937	0.0398314	0.71538	-0.277938	0.579187	1.45043	-2.71193	-0.30532	0.16782	-1.84609	-5.76388	3.48037	-0.929207	-1.21604	1.25821	-0.535282	-0.644913	-6.05806	-1.0345	-2.83799	1.27454	0.442212	2.98261	1.79622	1.29015	-1.27944	-2.89111	1.10099	1.62095	1.30013	1.20507	-0.518167	2.13412	-0.619068	3.18147
SPAC1F8.06	-0.791188	-2.5452	1.99201	-4.10878	1.3656	-1.61939	-5.54331	-3.5907	-3.5907	-3.07918	-2.05089	-6.24329	0.199294	-1.75563	0.0854439	-0.425306	-1.26231	-0.274244	2.15042	-4.81441	5.27324	0.600019	-5.2974	-3.66698	1.19186	4.60103	0.640351	-3.89458	-2.07418	-1.65159	-1.13315	3.08065	-0.743959	1.6311	-1.05413	3.28251	-1.81942	-3.93133	-3.41607	2.28385	7.26793	-1.06038	3.83627	-5.51341	-6.54645	-0.783735	-4.87112	-5.77441	-6.33332
SPAC20G4.05c	0.993549	1.60816	0.598055	-0.278315	1.00526	1.68989	1.43101	0.725207	0.725207	0.579242	-1.44209	-1.58125	0.866134	-0.708134	0.649419	0.18914	0.373586	-1.3693	1.36212	-1.15665	1.10089	-1.01225	2.97178	3.19642	-1.47673	-1.71969	-1.39074	4.20341	-0.11977	1.32322	2.52758	-4.17721	-1.00023	-0.206594	-3.15678	-0.73931	-4.42802	-0.877482	-3.19227	0.673154	-1.34334	-1.67445	-2.20819	2.07581	1.92354	-0.503347	-1.26792	0.343365	-0.300781
SPAC20H4.03c	-1.21659	-10.2379	-3.06347	6.06115	-2.64252	-1.4329	11.3721	-1.90014	-1.19768	-0.442495	0.0288004	7.1704	-0.229825	0.845114	-0.384186	0.665416	0.932244	0.79276	-2.61248	-2.94256	5.44337	0.571966	-1.89615	-0.89208	9.41681	7.63008	-6.79848	-3.59103	-1.26807	-3.18469	-2.553	7.2825	1.17114	-2.83055	-3.82265	0.682656	-5.03334	-0.482597	-4.75926	2.06563	4.72954	0.880091	-3.21934	-2.20237	-10.6267	-1.47016	-2.74233	1.56328	-5.54683
SPAC21E11.04	-0.138411	1.05443	-2.76077	-2.09296	-0.295219	0.890804	-1.86591	-0.407478	0.0622097	-0.294792	-0.095473	-1.48196	0.230993	-0.824388	-0.296791	0.125699	-0.0434973	0.580163	1.78529	0.67506	1.38438	0.722126	1.31124	0.183534	0.214975	-1.25304	-1.53623	0.398095	-1.14356	-0.149268	0.119087	-3.36267	1.06135	0.516549	-0.68416	-0.363369	-2.63967	-0.412405	-1.18418	-0.554512	-3.24352	-1.13008	-1.36461	-0.251799	1.52672	0.524073	2.29374	-0.128328	-0.315178
SPAC227.17c	-0.437252	-6.4525	2.02627	-6.95779	0.134394	1.94221	-3.08146	-4.89456	-3.55363	-1.99873	-1.2693	-9.87766	-2.37138	0.260525	-1.80645	-0.576316	-1.08212	-1.53947	-5.5676	-19.3478	-5.40556	-2.18553	-15.6404	-10.5286	-7.01549	0.749304	-13.1289	-1.37485	2.97151	-0.897616	-1.62972	-5.66977	-2.05575	3.52805	-10.4241	1.64029	-18.0395	-11.5613	-8.56475	-9.85735	2.14267	0.485314	-12.1783	0.284997	-10.543	-2.14181	-3.60825	-5.29284	2.48816
SPAC22A12.06c	0.515214	2.04954	1.77375	1.75965	-0.268295	-0.891194	2.89921	1.27879	0.827862	-0.073155	0.172982	1.02535	1.2911	-0.762189	0.340027	-0.0216592	0.325681	-0.435877	-0.483036	0.345137	0.519638	-0.641644	-0.653072	0.0762389	-0.933984	-2.55741	-2.30377	1.72433	-0.966204	1.2404	2.59097	-1.36876	-1.00015	-1.19924	-0.00700936	0.313024	-1.20658	-1.01904	-0.460256	1.83413	1.12483	-1.05424	-6.77417	-2.23803	1.91905	1.01659	1.58331	-1.64686	-35.3374
SPAC22A12.14c	1.38649	2.35428	0.739666	1.8649	1.1325	1.51826	-0.276193	-0.628745	0.426665	-0.300916	0.363252	-1.36251	0.866915	0.552379	-0.221303	0.110396	0.086327	-0.32015	0.905288	-2.1094	0.901367	-0.447298	-1.32087	-1.6041	-1.22932	-1.79812	-1.30076	0.648609	-0.983326	1.51928	0.036442	1.15094	1.0473	-0.206325	-0.52569	1.14831	-2.01078	0.135019	-1.18832	-0.393151	0.644187	-0.628529	-1.56519	-0.0232783	0.914404	0.25693	-1.76937	-0.96126	-2.54987
SPAC22E12.14c	-2.42109	3.30768	0.88613	-3.70012	1.99172	-1.88586	1.43489	2.79949	1.68383	0.50886	-1.06822	4.82045	-3.52685	0.603734	1.39252	0.626371	-0.0346867	-0.954053	-2.61908	4.0574	1.84846	-0.342297	2.15335	-0.27322	4.16507	-0.951238	-3.4759	2.38899	-1.17117	0.304994	1.99306	-2.25057	0.729668	-2.57922	-0.240927	-1.6418	2.9919	2.17652	2.79481	0.302712	-4.13096	-2.44669	3.98699	3.90694	1.91922	0.827287	3.35034	4.37052	6.82739
SPAC22F3.04	0.275946	0.413538	-0.736992	-1.21192	1.03907	1.74225	1.33982	1.04252	0.784152	1.10008	0.631902	0.585604	0.0883899	-0.694732	0.139492	0.789146	2.17386	0.201229	2.22723	1.69227	2.40427	0.704522	1.37018	2.86627	1.75861	-1.21508	-2.5344	-0.599438	-0.397139	-0.409292	0.0974647	-3.93261	1.99385	1.72476	-2.22754	-0.940053	-3.79243	-2.76554	-3.52585	-0.444069	-1.51421	-1.07056	-2.11917	-0.149738	2.62122	0.86187	1.94644	0.584355	-0.385771
SPAC23A1.06c	0.255031	-0.654162	1.17202	3.55086	0.68381	1.57705	1.80503	0.691717	0.691717	0.32753	0.319136	3.54242	-0.87542	0.516511	-0.0325548	-0.000679632	0.576335	-0.285484	1.04414	2.75595	2.1017	-0.401977	-1.13525	0.545259	-1.17233	0.702207	-1.50154	0.91898	0.751254	-0.0679202	0.375445	2.78799	-0.983346	0.464408	-1.46038	0.893184	-2.65354	-0.437831	-1.54724	0.444135	4.19861	-0.417878	-5.56261	-0.629345	-2.62236	0.629455	1.16692	-1.12771	-1.62206
SPAC23C11.08	-0.159009	2.76554	-0.43623	0.45805	0.36031	-2.6415	-0.793766	-2.27588	-2.27588	-1.06436	-0.775691	0.610759	-2.2843	-1.34652	0.143791	-1.04499	-0.840207	-0.575698	0.826644	-2.14133	-2.45398	-0.463463	-2.65949	2.26835	-1.74993	-0.7662	1.82555	0.94716	0.437978	2.16588	3.0342	-2.95054	0.368789	0	1.17219	-0.937195	1.2995	1.20594	0.50558	0.473343	-2.28361	-0.657404	-0.41057	1.16538	-0.706343	-0.145965	1.09635	1.78542	-1.76802
SPAC23C4.09c	0.745975	-2.06194	-1.06295	5.68377	1.07071	1.01435	0.432868	-1.33374	-1.0596	-1.26927	0.442119	3.04507	1.1411	0.841264	-0.387455	-0.112989	-1.09809	0.371248	3.43585	8.92008	3.5001	1.41516	1.37969	4.67696	0.989445	-0.156953	5.17973	0.655365	-0.481541	-0.588531	0.801142	-3.93609	1.71421	-0.332154	0.22351	0.28582	-2.40388	2.09547	-2.70969	-0.706818	2.37127	2.06366	6.72763	-0.791429	3.91888	-0.586281	1.71727	-1.41272	-2.81205
SPAC23D3.03c	0.321691	1.06216	2.77666	5.38059	1.32408	-0.943164	-5.1078	-0.673255	-0.103506	-0.332569	-0.60258	2.21786	0.857471	1.04312	-0.718044	0.393781	-0.59212	-0.198457	-0.887555	0.894497	0.927266	-0.551532	-1.12062	1.99055	0.744483	-1.79607	1.69006	-0.871007	1.05874	-0.278032	-0.357058	-1.67003	0.426016	0.479332	1.3592	0.239109	1.27729	-0.721076	-0.0715508	0.144933	6.59571	1.36299	1.44253	1.44903	-1.90728	1.16436	0.736256	-2.34717	5.31535
SPAC23D3.04c	-0.865027	-6.12725	2.83027	-3.88426	0.834687	1.73768	-4.38203	-2.13431	-1.93161	-1.14555	0.0544888	-7.59142	-2.16795	-3.11427	-1.36976	-0.596933	-0.469423	-0.404622	-4.19147	-20.3552	-8.72359	-0.225357	-19.623	-9.34062	-2.37976	3.2623	-11.0976	-1.00423	1.55508	-2.30498	0.0929023	-4.35587	-1.90323	4.96211	-5.94167	-2.05189	-16.3828	-7.89339	-6.94803	-10.4916	1.28043	2.79904	-12.1075	0.632579	-7.8903	0.703254	-2.33324	-3.30176	3.19065
SPAC23G3.05c	-0.39389	2.15532	0.944284	0.814584	2.23042	0.902445	-2.03487	0.938507	0.938507	0.57311	1.01714	-4.07074	-0.890956	1.88159	-0.229691	0.0747373	0.205118	0.533811	1.99614	2.87987	-3.88611	0.783385	2.48068	0.655385	1.61763	2.2363	0.713873	0.957559	0.728609	0.203496	1.69693	1.02568	0.610771	0.0333976	2.35544	1.10119	2.19451	0.984687	0.86393	-2.42511	0.514833	-2.59956	2.91669	-0.884667	1.37821	0.860537	0.486935	0.840371	-2.6285
SPAC23H4.09	1.11699	3.02209	-0.543096	2.42753	-0.400654	1.22478	0.884882	-0.764098	-0.764098	-0.786151	-1.41663	-0.812777	0.646459	-0.215596	-0.0721053	-0.74561	-0.856016	-1.22916	-1.76653	1.52622	-0.309246	-1.39992	-2.28815	1.71453	1.23257	0.553897	2.30037	-1.14096	0.184545	1.73774	0.187623	-1.66122	1.21381	-0.565431	0.611462	0.306551	1.25227	1.67405	2.827	0.119631	0.783176	-1.05345	1.88999	-0.269834	2.15433	-0.486086	1.02242	-1.28718	0.76837
SPAC24H6.04	0.223418	0.66448	-1.23088	-1.47824	0.421293	1.02634	0.248567	-0.28269	-0.28269	0.0919632	-0.49073	-1.69183	0.286066	-0.479578	0.0307011	-0.177968	-0.304348	-0.266877	1.29176	1.37395	1.13586	-0.117186	1.99647	2.43549	-0.308587	-1.69181	-2.09631	0.708293	-0.216089	-0.346804	1.04891	-2.88135	0.818181	0.346893	-0.590186	0.71147	-4.03512	-1.28227	-3.9733	-0.141038	-0.833563	1.06541	-1.1297	0.0457259	3.13275	0.335701	4.28298	0.179911	1.57873
SPAC25A8.03c	0.170618	1.57485	-1.89622	1.89812	0.265102	0.963321	-0.543271	0.951566	0.709525	0.568625	-0.524344	-1.45867	0.267809	-0.456849	1.11666	-0.142055	-0.384213	-0.173103	1.2369	0.334232	1.11796	-0.248077	1.55405	0.820402	0.775125	-1.57468	-1.02345	0.520685	-1.0348	0.621466	3.02992	-1.85501	1.10178	-0.275815	-1.09563	-1.02152	-3.04375	-1.33583	-2.13216	0.37431	-1.33273	-1.29747	-1.10361	-0.468168	2.95959	-1.10036	4.10434	-0.692998	-1.91048
SPAC25B8.08	0.22868	2.68412	1.01357	0.956037	-0.387491	1.72233	0.464232	-0.44026	0.232666	-0.241706	-0.26681	-1.95051	-0.178254	0.467863	-0.21354	-0.407035	-0.0329671	-0.576182	1.97492	-2.57251	-0.691844	-0.74387	1.40778	1.27756	-0.882434	-1.73986	-2.62222	1.1025	1.0034	0.923993	0.934345	-10.207	-1.8497	-2.04363	-1.57547	-1.04543	-1.31711	0.0967394	-1.47767	0.550208	-1.55112	-1.04821	0.985764	-0.346317	1.46828	-1.78194	2.66235	0.259599	-0.91469
SPAC26F1.10c	-4.64784	4.09594	-0.94237	-3.617	3.92124	6.79277	15.374	6.50177	6.50177	2.02022	1.26009	-5.54586	-4.83893	-2.24701	1.61041	2.84502	1.66401	0.828216	3.65376	7.83878	-3.88646	0.498562	-2.76873	-10.7873	-7.70729	8.89531	8.88368	0.876089	3.00832	-1.75799	0.952038	3.12746	-3.38409	-0.13878	3.00997	-0.434754	-1.28583	-4.57405	2.15118	-5.52946	-1.18248	-0.7746	8.79297	-1.9475	-5.89898	1.82651	-3.78225	2.8676	-26.1764
SPAC26F1.12c	-0.243876	2.6632	1.00545	2.44805	-0.424011	2.93617		-0.340975	-0.340975	0.243148	-0.341022	1.28697	-0.332077	-1.39814	-0.129168	-0.206	0.0326855	-0.596647	-0.796576	-0.653838	0.717016	-0.0135557	0.901696	0.261055	0.663629	-1.22923	1.95917	0.439939	0.54861	0.607502	-0.123293	0.695276	-0.475086	0.443089	1.75807	0.834592	0.83033	1.62178	0.697213	1.20295	0.734799	-1.79131	1.35843	0.407539	1.12227	1.46334	-0.752544	0.382844	-0.501808
SPAC27E2.03c	-0.284235	-4.12895	1.83423	-4.83041	-1.65705	0.943647	-4.48325	0.640823	0.640823	0.679156	0.207998	-7.10396	-1.05027	-2.01772	5.98678e-05	0.721525	1.34315	0.167908	-4.96875	-16.4033	-8.22876	-0.16614	-0.48329	-3.74484	2.57349	2.78702	-11.03	-2.08858	0.543635	-1.01483	-0.0887153	-2.94327	-2.24179	5.26774	-8.9866	1.29119	-17.9347	-9.84523	-7.22931	-9.31893	3.74829	3.19993	-14.7944	0.669845	-12.5507	0.805502	-2.74557	2.21799	1.9869
SPAC29A4.20	-0.365769	-3.84017	1.83008	-1.40399	-3.71856	0.0867542	-3.52448	-1.57484	-1.57484	0.849241	0.277027	-6.83242	-1.61395	-1.2836	-1.33353	-1.00554	0.580408	-1.75425	-7.30285	-20.7093	-7.22389	-1.89131	-17.7946	-9.44048	-2.21358	2.43941	-13.5607	-1.68108	0.374807	-1.18382	-2.33425	3.26886	-2.98309	6.09444	-9.43299	-1.63335	-22.0335	-13.8419	-7.91589	-10.263	4.91854	2.6794	-15.175	0.661368	-9.95895	1.33287	1.54448	-2.8736	1.77325
SPAC2F3.18c	0.0883718	1.95373	-0.480832	1.49479	1.25483	-2.80273	-0.0363103	-0.153472	-0.0783392	-0.193656	-0.00350471	1.34976	0.514055	-0.359591	-0.181998	-0.0456801	-0.660987	0.0562079	0.678858	0.501802	0.637321	-0.0300586	1.76182	3.07023	2.19935	-1.9229	2.41504	1.19802	-0.531597	0.8496	0.881898	2.48566	2.32296	-0.627929	0.177066	0.826583	1.1769	1.25725	0.172297	0.980651	-1.54895	0.627323	2.40664	-0.211187	2.39676	-0.243197	2.13178	0.327828	1.66759
SPAC32A11.03c	0.974796	3.26591	1.24493	4.25666	-2.22118	0.270642	1.48256	-0.30486	-0.30486	-1.59679	0.463887	-1.2217	0.161944	0.993137	-0.148991	-0.224624	-0.724798	0.262397	-2.4005	-2.20812	-2.35899	-0.48656	2.31178	-2.19706	-2.06649	6.6887	2.88678	1.21287	0.208273	0.509879	0.684619	15.2927	-2.45958	-0.99067	-0.129195	-3.28125	1.20111	0.483568	-2.73255	-0.299047	-3.90012	1.37535	-3.72058	-4.97653	4.78526	1.6903	0.905832	-1.23999	-1.93772
SPAC3A11.02	-0.818397	-1.1247	-0.744798	-3.20816	0.562201	1.10066	0.602151	-0.35733	-0.35733	0.152275	0.246619	-2.27969	-1.69486	0.727687	0.254031	-0.105882	0.626614	-0.637182	1.08359	-0.39143	-0.80155	-0.638698	1.5521	-1.79532	-2.30607	-1.10452	2.66618	0.991495	0.634736	0.098861	0.5097	-2.53613	-0.657022	-0.116551	-2.44018	-0.518389	-3.58546	-0.0708095	-4.63617	-0.832424	-3.20888	-1.24294	-2.51353	0.654309	-3.62704	1.16203	-0.490249	1.02287	-1.14499
SPAC3A11.10c	0.103181	4.12512	-0.743423	3.07962	2.33764	-2.07013	1.22865	-0.291987	-0.00873954	-0.240593	0.75893	1.70612	-0.120466	0.601062	0.201702	-0.176443	0.536919	0.181815	1.31419	1.97978	-3.31948	-0.301901	1.55532	2.08351	3.71075	-0.450807	2.28404	0.779842	-0.515995	0.879482	1.30294	2.03813	2.61109	0.195592	2.39519	0.787149	2.54037	2.57091	3.48818	0.293646	1.16674	-1.51695	1.39953	-0.365177	4.0382	0.933095	2.01521	-0.865262	-0.87149
SPAC3A11.11c	0.464229	1.81963	-0.97281	-0.275646	0.944484	1.40025	0.465788	-0.51044	-0.51044	-0.249805	-0.194061	2.31595	0.272853	1.10953	-0.267499	-0.0965444	-0.181438	-1.09902	0.293148	-0.831177	-1.9945	-0.914298	1.51336	1.0509	-0.844646	-0.77977	1.69854	1.10086	-0.80751	1.70003	0.455245	4.92715	-0.812727	-0.567326	-0.398285	0.221481	0.617686	0.600459	-0.52684	-0.0752095	1.18383	-0.42832	0.530782	0.780921	-0.722434	-1.27699	0.763162	0.267498	-0.490387
SPAC3A12.03c	1.02055	1.97036	-0.850606	-1.21979	-0.70271	-0.393788		-0.982181	-0.166796	-0.0533807	-0.381892	-0.80199	0.729969	0.542789	-0.548186	-0.112128	0.349433	-0.122225	0.838554	-0.937086	0.970968	-0.740798	-0.823746	0.691149	-0.709099	-1.39834	-0.382215	-0.618126	-1.16621	-0.53228	-1.33391	-1.17256	1.18484	-1.33833	1.4087	0.716183	-1.29007	-0.955585	-1.79734	-0.292908	0.641422	-1.15483	-0.973965	-0.263855	-1.05491	0.762716	1.48767	-1.26361	-1.75409
SPAC3A12.13c	0.448179	-5.99422	0.771103	-5.47209	-3.02292	-2.49844	-2.83061	-3.70415	-3.70415	-1.28383	-0.642783	-8.15292	-1.70173	-1.15399	-1.16877	-0.915134	-0.324803	-0.30656	-6.39461	-19.1812	-4.51838	-0.377546	-16.4079	-9.14774	-6.89068	3.29631	-13.8425	-1.83005	2.9934	-2.3625	-1.65236	-4.99123	-2.2783	1.63632	-11.4812	-1.19223	-20.888	-12.3939	-10.5421	-10.984	-1.50795	2.42694	-11.8081	0.668637	-9.9338	-1.16625	-2.59896	-1.3977	1.58588
SPAC3G6.03c	-0.570659	1.34926	-0.770244	-0.633744	-0.46075	1.23198	-1.02035	0.274141	0.244715	0.156234	-0.53185	1.88515	-0.725706	0.357648	0.148771	0.0292546	-0.0979618	-0.873004	-0.561221	-1.36388	0.387448	-0.910029	-0.473454	-0.495423	0.585681	-1.8903	2.09756	-0.686205	-0.782261	0.177844	-0.432747	1.93615	0.405333	-0.444726	-0.200264	-0.646386	1.00869	0.402171	0.867182	0.0584585	5.13882	-0.684737	2.8856	-0.0239265	-0.860146	0.902811	0.901626	-1.44039	1.22692
SPAC3G6.05	-0.241381	1.60903	1.66408	3.15761	0.728651	0.272515	-0.450225	-0.363522	-0.073673	0.0145263	-0.204377	-1.65945	-0.751692	-0.75753	-0.549239	-0.409547	0.213205	0.139137	-0.649126	2.43312	2.06216	0.170181	3.05118	0.133678	0.827283	2.04248	6.14257	-0.833381	0.170535	-0.0117332	-1.1276	3.39944	0.84472	2.08966	2.66314	0.663653	1.87667	-0.93252	2.54167	-0.861918	1.79157	1.44849	3.09839	-0.286616	3.43113	-0.889165	1.36901	0.211946	-0.687018
SPAC3G9.11c	-0.959572	-9.9657	1.50739	1.29244	-0.77365	-2.07554	-3.43604	0.606437	0.606437	1.05944	1.10583	0.346074	-0.869403	0.393803	-0.0258903	-0.0108907	0.636023	0.356775	1.20308	-7.63271	-0.738689	-0.320324	0.641603	0.712988	-0.524145	4.02692	5.50375	-2.77975	0.98319	-0.510562	-1.05109	20.8427	-1.45449	0.188481	1.85178	-2.87808	1.55525	-1.99957	0.936203	1.48548	3.27773	1.55372	-2.78383	0.484726	1.8792	-0.890112	-1.21353	0.30151	-1.77752
SPAC3H1.03	0.140155	-3.15102	0.717853	-1.10902	1.82529	-1.18707	-0.602137	-0.316972	-0.316972	-0.513415	-0.763099	1.41451	0.684044	-0.450018	0.304264	-0.0362066	0.177045	-0.295376	1.13568	0.571465	1.63288	-0.0241784	0.468447	0.160457	2.17344	-1.62795	-5.50987	0.530773	-0.934476	1.07397	0.317891	4.97744	3.00798	-0.929796	-1.12197	0.571775	-0.938479	-0.546979	-0.0789783	-0.229497	0.601781	0.579123	2.218	0.473074	-3.10693	0.540125	1.29509	-0.416417	-0.862502
SPAC3H1.08c	-0.572738	-0.804843	0.619635	-2.81972	0.699839	-1.32493	-0.730923	-1.23085	-1.23085	-0.732849	0.129247	-2.45691	-1.59364	-2.25328	-0.571958	-0.338095	-1.21989	-0.165135	1.33566	-4.19515	-1.65263	0.00737601	-2.25702	0.765544	-0.841957	-2.31023	1.07753	0.293506	-0.532697	0.536433	0.623299	-5.42719	-1.4329	-0.802686	-1.04453	-1.08191	-1.76466	-1.66604	-1.50007	1.17649	-2.40998	-1.6394	-1.3254	0.437949	-5.48988	1.24294	-0.934518	5.96392	-2.72477
SPAC3H1.11	-0.156588	-2.80217	1.22716	0.429226	0.770898	-1.8811	0.616089	0.401928	0.401928	0.77514	0.364498	1.5002	-0.505746	1.13886	0.0563858	0	0.831837	0.446626	0.236263	1.64886	1.50829	0.18408	1.2495	-0.323162	2.0596	2.33433	2.59896	0.71059	0	0.427895	0.0917319	-1.77777	0.742448	0.434593	0.696259	0.302798	0.128239	0.156157	-0.139812	0.601375	-0.877888	-0.17881	1.52781	-0.131843	-0.825213	0.441347	-2.05137	0.0696735	0.743699
SPAC3H5.08c	-2.54779	-4.63922	0.809899	2.56306	2.65302	1.60616	2.01837	2.2677	2.2677	1.6234	-1.01447	-5.69653	-1.87013	1.15762	1.61622	1.23099	2.83631	-0.44831	-5.0315	1.87624	-3.88695	2.38345	4.2554	-0.507838	0.699498	7.42419	-8.38598	-2.22182	2.69891	-0.254137	-0.706915	-15.9878	-1.60614	2.58111	1.50876	-1.3035	-0.197637	0.616526	0.91402	3.17467	-1.37113	-2.66981	-1.77692	-0.107421	-5.71646	-3.08218	-0.564093	1.24326	1.67619
SPAC3H5.09c	0.173702	-0.761878	-1.58782	0.946504	1.35154	-0.746586	1.66183	-0.578981	0.304253	0.393335	0.466268	1.00366	0.404392	-0.407703	-0.136672	-0.094934	0.634916	0.270727	1.65372	-1.01043	2.58084	1.25249	-1.04311	1.27411	-1.96058	0.310141	0.437348	0.512208	-1.77634	-0.544713	-0.581408	2.20733	-0.810048	0.461149	-0.164607	0.0693859	-3.99709	-1.61814	-5.34887	0.253675	-1.15654	-1.86939	-0.719181	0.431847	2.97561	-0.262142	0.801844	-1.79648	0.383502
SPAC3H5.10	-3.37688	-3.53771	2.46643	3.56584	2.00926	-1.59661	0.299935	2.1452	1.9827	1.11817	0.797767	-6.52231	-2.25729	-2.50344	0.795025	0.719396	0.794577	1.31143	-2.61006	-16.7826	-6.1807	1.31582	-15.2077	-9.35548	-1.62916	1.54227	-9.88838	-3.09286	1.98887	-0.10845	-0.966709	-7.04101	1.72136	6.3006	-7.14005	0.779277	-14.1396	-8.2508	-4.96943	-3.36699	4.69492	2.10614	-10.1259	2.39902	-11.9978	-2.02518	-3.36072	-0.45263	4.71325
SPAC3H8.03	-0.751771	3.00013	0.928463	1.32532	-0.556505	-0.931766	2.12825	-2.89925	-2.89925	-2.30912	0.775944	0.943839	-2.26893	-0.74313	-2.04063	-1.34403	-1.21297	0.518205	1.59921	-1.79433	1.3858	1.80504	-1.58399	-0.74595	-3.69954	1.29645	0.410544	-0.683174	0.383038	-1.21135	-0.554154	0.958206	0.941995	-1.67531	0.257436	1.38124	0.211194	-0.782388	-0.410216	-6.64911	0.972848	1.10217	1.85655	-0.353895	0.74698	0.577057	0.800681	0.300294	1.48426
SPAC3H8.04	0.298215	1.46503	-0.791154	0.178321	0.829897	3.54362	1.81142	0.824621	0.824621	0.18248	0.490835	0.363317	0.132884	-1.15811	0.360299	0.53907	1.08068	-0.489491	0.639569	1.1815	0.95394	0.208697	-0.25507	-1.16869	-0.704466	-0.561293	1.18738	0.983991	-0.782481	-0.238879	-0.000447668	-1.54633	-1.73605	0.957698	0.101543	-1.27444	-0.52645	-0.776044	-1.17873	0.566768	-1.06184	-0.754774	-1.2325	-0.679908	0.898675	0.519587	0.737296	-0.601518	-1.45647
SPAC4G9.11c	0.23891	0.49851	1.06217	2.41017	-0.246711	-0.91148	1.20119	0.786624	0.786624	0.381826	0.498353	-0.539089	-0.620802	-0.45857	0.251534	0.0514733	0.747734	0.0717506	-0.45226	-0.544925	1.49884	0.562123	-0.277327	0.834505	-3.05175	-0.0199408	1.2249	0.437664	-0.415398	0.255606	0.763621	-0.745384	0.458867	-0.0285585	1.08538	1.02318	0.719261	0.684814	0.440169	1.03122	1.39426	1.52213	0.848075	0.707333	-0.445656	-0.439	-0.962032	0.759074	-0.776392
SPAC4G9.14	-0.156588	-2.03299	-0.982175	-1.85938	-2.25616	-1.44764	-1.25721	1.13796	1.13796	1.11365	1.19884	1.76704	-0.455265	0.462551	-0.0324358	0.418978	1.111	0.731535	-1.04072	0.457638	-3.26305	0.231025	-0.0121654	-1.53854	-0.770044	-1.75231	1.53636	-1.90575	0.211127	-0.357201	-0.508446	1.56847	-1.36073	0.644505	0	-0.524631	-1.42969	-0.515541	0.28165	0.601892	-2.15294	0.482818	-0.89153	0.461052	-9.73474	-2.41497	0.495472	-0.316411	-3.27863
SPAC4H3.04c	1.79188	-2.18967	1.22224	-3.54998	0.492966	-1.37485	0.280181	-1.45445	-1.45445	-0.687266	-0.435256	1.05272	1.5011	-0.512779	-1.19392	-0.61065	-0.388393	0.784116	1.10006	-1.82702	2.54649	0.869585	-2.49931	1.53263	1.48048	-2.12738	3.61248	0.59376	0.249404	1.68907	1.32977	3.25724	2.32269	-2.15157	-1.69592	-1.47033	-0.246386	0.682955	-1.1256	0.0292193	1.25734	0.856864	-1.62525	-0.640183	1.02729	-1.11534	-3.0245	-1.40431	-1.1643
SPAC4H3.06	1.02535	1.3721	-0.633783	-1.31279	0.75777	2.31686	1.16319	-0.70722	-0.316621	0.149356	-0.0218285	-1.75251	0.871116	-0.635357	-0.136262	-0.346029	0.0347295	-0.221401	1.29348	-1.7963	0.69063	-0.222054	0.329981	0.535029	-0.633895	-0.645015	-0.581352	0.67116	-0.601424	0.673853	1.06624	-3.96207	0.974112	-0.300195	-0.844977	-0.535577	-4.91989	-1.85588	-5.33449	-0.436764	-2.3498	-1.55027	-1.66284	-0.178927	1.16797	1.69155	0.577271	-1.14245	-2.13789
SPAC4H3.07c	-3.38388	-7.67171	2.86788	-5.15599	-1.16894	2.9611	-4.46173	-1.91903	-1.91903	-0.0677705	-2.36968	4.69511	-3.50801	-0.899173	-0.551768	-1.20989	-1.75033	-3.27963	-1.55406	10.4253	9.80726	-3.08099	2.29984	-1.56789	1.37152	6.17644	5.50384	-4.11292	4.84626	-6.68375	-2.57113	5.25523	3.1671	-1.82341	3.36313	-1.98166	2.97159	2.49183	2.81128	2.3178	1.42333	-4.04503	8.33914	1.85699	-2.82054	5.30488	-3.8399	1.42092	2.61481
SPAC521.03	0.215821	0.915044	-0.82445	-0.991375	0.934812	1.96372	-0.0328828	-0.445755	-0.303482	-0.360361	-0.221105	-1.18085	-0.810348	0.0902004	-0.0525205	-0.0944239	-0.848385	-0.780401	0.436115	-0.251399	-1.58713	-1.16768	0.667147	0.23126	-1.51678	-0.0995465	-1.86349	-0.592678	-0.319342	1.06646	1.08153	6.67051	-0.654681	-0.270526	0.216147	-1.04134	0.179959	-0.446137	-0.125617	0.1666	-1.61408	1.19164	-1.27052	-0.283463	0.83933	-1.47512	-0.502818	1.3794	-1.51746
SPAC56F8.02	-1.01566	-5.56849	2.12973	-6.4854	5.01832	3.91925	1.48793	1.61553	1.61553	1.4474	1.58169	1.42101	0.640515	0.529662	0.648644	0.955935	2.70976	2.60142	1.01014	-3.62524	2.95882	1.90596	-5.12549	-6.72654	-7.85681	1.59734	-7.03478	0.895543	1.78789	-0.495979	-1.10095	-1.5807	-2.56644	1.69156	1.434	-2.68276	3.03103	-1.75367	4.08003	-2.00966	5.88112	-4.3099	-5.76924	-1.01355	-9.97106	-1.26967	-0.565982	1.02177	-1.28158
SPAC57A7.09	0.4653	2.07582	0.736527	1.11828	0.96876	0.812149	-0.797705	1.31951	0.757405	0.938283	-0.0674914	1.65977	0.305206	0.722135	0.199213	0.646811	1.07875	0.489117	-0.352114	1.00512	0.761712	0.202698	-1.33776	0.787467	0.578867	-0.155907	2.94183	4.69055	1.34701	1.34185	1.26019	-1.48835	0.252845	-0.246866	-0.907745	-1.05729	-2.50526	0.0337887	-0.919149	0.455812	0.948177	-1.44567	-1.01569	0.265141	0.755314	0.187925	0.78015	1.0863	0.925625
SPAC589.07c	0.30137	-4.07236	-1.7621	-6.5878	-0.986006	2.4148	0.551947	-1.837	-1.78466	-1.41717	-0.503031	1.43112	-0.39816	0.486983	-0.228993	0.0961784	-0.300345	-0.210774	1.7756	-2.8718	1.9807	-0.27511	-1.43862	-0.681012	-0.935045	2.98009	-0.895138	0.722583	0.561618	0.221273	-0.386421	15.3244	-1.02121	-0.0358489	-0.303609	-0.790662	0.238783	-0.786442	-1.11238	-1.71894	1.11621	-1.10729	1.57595	-0.895967	3.40065	0.524063	2.04029	-1.08865	-1.7901
SPAC5H10.06c	0.195987	-2.17334	-1.69384	-1.74013	1.83639	1.20602	0.366242	1.16296	1.16296	0.263704	-1.00555	1.31005	0.325567	-0.579348	1.1109	0.528767	-0.256733	-0.950293	0.982577	1.02812	2.39473	-0.315284	1.61556	3.66332	-2.91789	-0.201858	-0.661942	1.41053	-1.844	0.173266	0.143319	-2.02172	-1.20511	0.713608	-1.15576	-2.54537	-2.66174	-0.673906	-1.7275	-0.926309	2.11527	-1.30756	0.842797	0.0289993	1.63402	0.708824	4.04633	-0.566202	-0.706545
SPAC637.07	-0.53321	-10.0183	0.610568	-3.95711	-3.4575	-0.70059	-4.56411	-0.530855	-0.29098	1.7838	1.20059	-11.839	-0.42133	2.76434	-0.192981	-0.237646	0.845919	0.272076	-8.82437	-17.3157	-8.98116	-0.910459	-17.3795	-11.3692	-8.58534	0.582861	-12.6309	-2.6155	0.416638	-1.65777	-2.10267	-5.81896	-3.39866	3.09282	-8.88889	1.41796	-19.2171	-12.3413	-7.7702	-13.7507	-4.03102	2.92592	-8.98576	-0.101909	-11.552	1.53475	-4.61	-3.85402	2.21329
SPAC652.01	-0.50544	2.02615	1.55221	0.561424	-2.5301	-1.60007	0.918883	-0.641116	-0.641116	-0.513479	-0.484138	-1.33541	-0.641014	0.791108	-0.352046	-0.809085	-1.25136	-0.607799	0.884466	-1.03516	1.53902	-0.686036	0.246631	-0.641406	-1.47618	-1.80348	10.5578	-0.540761	-1.9596	0.390233	0.0387296	-1.99744	-3.51816	-0.370648	1.93228	0.915487	0.934849	1.21155	-0.848754	1.25802	-1.57032	-0.701414	1.452	0.347106	1.82811	1.26238	2.04968	0.704014	-2.20573
SPAC683.02c	-0.363838	2.26052	0.484311	-0.541315	1.26698	0.665678	2.11078	0.584435	0.199918	-0.61986	-2.7956	-1.87824	0.693856	-1.24086	0.136803	0.153461	-1.03074	-2.32671	1.97431	2.16114	1.92425	-2.59485	2.85873	3.81143	2.11756	0.65386	-9.41386	1.35743	0.535264	1.62812	1.73372	-1.82663	0.781498	-0.336455	2.035	-1.04703	-2.65989	1.32893	-3.06057	0.534687	-1.30806	-1.59326	-5.33814	-0.597675	2.9783	1.31785	4.61375	0.32926	1.02276
SPAC688.03c	0.868998	-1.44721	-1.33766	-3.59883	0.641402	0.549861	0.0708831	-0.38535	-0.253709	0.102405	-0.457216	-1.30698	0.540903	-0.531268	-0.318268	-0.147422	0.0347935	-0.702407	1.24384	0.723602	0.843652	-0.549357	-0.214081	0.594745	-1.1696	-4.48066	2.44551	2.34631	-0.0101245	1.15809	2.10645	1.64964	-0.784069	-1.9888	-2.65846	-0.102061	-5.66619	-2.50412	-5.87364	-0.694717	-2.00899	0.806262	-1.78634	-1.00919	3.68201	-1.21049	-0.35711	1.09065	0.937372
SPAC688.13	-0.392403	0.238279	1.72763	-1.79453	0.606394	1.48769	0.953067	0.809001	0.809001	0.736284	0.598267	-0.979927	-0.292077	0.349914	0.185577	0.676946	0.719177	0.615959	0.644859	0.797581	1.64793	0.257906	-0.977732	-0.994429	0.593172	2.25298	-3.60487	-1.01871	0.19634	-0.699526	-0.166625	-2.84281	0.697045	0.633988	0.211873	-0.670438	-2.5266	-1.4479	-3.01878	0.677736	-1.53943	-1.07732	5.34586	0.530412	-4.00872	0.184978	2.04881	0.69147	-0.681414
SPAC694.02	-0.096729	6.05258	1.03534	11.3178	-0.190308	2.8863	7.5637	2.40118	2.40118	0.564745	-0.267885	6.32183	-1.01934	-4.14065	0.854137	0.40225	-0.297101	-0.53977	-2.79319	-5.42108	4.21249	-0.0849673	-0.722831	2.61792	2.06701	5.81216	-9.19557	-2.24013	-1.39433	2.14984	0.929535	-2.05135	3.46823	1.02137	3.70297	-1.54512	1.87527	0.863508	2.94366	1.19535	4.82496	-1.02883	-12.0184	0.370606	9.27246	-3.22055	1.59582	3.11529	1.09378
SPAC694.04c	0.356582	1.05271	0.588559	-3.47834	0.782253	-1.19534	3.18488	1.02382	1.02382	0.542702	-0.437619	-0.544041	0.445431	1.05902	0.431512	0.50321	0.456928	-0.522965	-1.3608	-5.88604	2.5798	-0.547522	-12.2479	-1.26566	-1.5697	-4.02097	4.55627	5.72262	0.598975	4.56633	4.26773	6.52055	1.11272	-2.11501	-1.77437	0.589621	2.4607	0.801436	3.07521	0.651043	1.62633	1.38653	5.48022	1.08362	-1.06525	-1.32058	-1.68833	-0.777124	0.49421
SPAC694.06c	-1.78573	-11.6657	1.55252	2.96791	0.409878	-2.86081	2.65728	1.42508	1.42508	0.503413	-0.384466	-1.44522	-0.419601	-1.32936	0.960074	0.250056	-0.478088	-0.132883	-0.498237	-0.885476	1.77007	0.538629	2.78272	3.61496	2.49081	-4.64276	2.96766	1.01228	1.38947	1.61612	1.5355	4.67804	2.4138	0.889437	-28.5368	-1.31117	-30.9809	-25.9434	-9.40671	1.45171	-2.74158	-1.95019	-33.0906	-3.80605	2.43665	-1.9999	-2.52548	-0.30509	0.552962
SPAC6F12.02	-1.78935	-3.5178	3.12733	1.68154	6.14217	5.70682	3.30998	-3.03903	-0.595629	-0.460408	-2.46232	9.09546	-0.899769	-3.49994	0.604366	0.84025	0.0442211	-0.0285625	1.18318	2.06717	-2.47454	1.39099	3.72249	0.331539	7.37719	-2.80219	2.67132	3.10523	3.13244	1.83725	4.16414	8.63007	-2.20347	0.510546	2.98457	-2.09694	6.73362	5.57362	9.93492	-1.37325	-2.97829	-3.72909	-7.54516	0.738765	0.791987	-1.63945	4.09225	2.35497	8.58163
SPAC6F6.13c	-0.156588	-1.62841	-0.820919	3.74269	-1.50351	0.807585	-0.670586	1.67865	0.961972	1.02699	0.734086	-0.764003	-0.546607	0.639596	0.60771	-0.124727	0.0869549	0.14428	1.0544	1.1796	1.91222	0.481744	-2.05331	-0.131629	-3.24879	1.51298	-1.97113	1.40868	1.1944	1.47816	0	-0.367627	1.64087	-0.13466	-0.0172014	0.0750181	1.77136	1.6286	0.814691	1.60632	-1.07854	-0.797329	-0.611055	-0.0508846	-0.713063	-0.32818	0.673858	0.67563	-0.366522
SPAC6G10.10c	-0.175945	2.97179	-0.979521	3.33327	-0.62055	-0.372356	0.546802	-0.455981	-0.455981	-0.341441	-0.0598834	-1.47186	-0.549162	-0.408222	0.0291928	-0.665469	-0.201455	-0.1787	-0.852534	0.608456	-3.21158	-0.545231	0.390363	-0.0719115	1.05258	-0.44352	1.21999	-0.461701	-1.29124	0.188644	1.03502	1.99058	-1.37703	1.76616	0.995164	0.690394	-1.57617	-0.0810187	-0.804645	-0.588626	-1.41595	0.32825	1.24187	-0.118163	1.79812	-0.332778	1.9148	0.553891	0.0993352
SPAC7D4.05	0.657365	0.888549	-0.757259	2.74035	-0.508819	0.221671	-0.684136	0.792222	0.792222	0.205965	0.508426	-0.740793	0.547616	0.045485	0.341574	0.169085	0.144856	1.19379	-0.360409	1.43811	-0.694401	1.02976	0.555712	1.91168	0.112395	-0.764062	1.51419	1.24341	-0.0290923	1.22618	0.40518	3.51652	-0.72636	-0.643829	-0.725905	-0.257681	-2.12045	-1.39565	-1.35597	0.679459	1.55491	1.80485	-0.900444	-0.529713	0.431137	0.172205	0.549688	-0.349596	-1.02855
SPAC806.04c	-0.12022	1.50498	1.11435	0.513196	-0.605485	-1.76965	1.44802	-0.0817512	-0.0817512	0.158611	0.784273	2.01155	-0.170384	-0.579349	0.261671	-0.287387	0.185992	1.0827	0.367328	0.663492	3.23153	0.267258	0.938663	0.53659	0.651376	1.40361	-2.02813	-0.240746	-1.69706	-0.00429287	-0.0714372	2.10315	0.298727	0.421965	-0.620738	0.69488	0.517898	-0.0697517	1.62587	0.195679	-0.199307	0.323132	0.625798	-0.0707141	0.455354	-0.24843	0.407056	0.675397	-1.18668
SPAC806.07	0.462916	1.93309	-1.17438	-1.43969	-0.371572	0.825649	0.0807172	-1.37465	-1.37465	-0.707397	-0.572101	0.879891	-0.42133	0.644298	-0.0716744	-0.110237	-0.445581	-0.792455	1.63576	2.63095	1.91762	-0.328847	0.980952	0.942587	0.190285	2.94631	-0.615897	-0.808652	-0.967956	-0.278669	-0.204423	6.31357	0.864905	0.270636	-0.282104	-1.12055	-0.809344	0.00814505	0.143349	-5.6958	1.85597	1.26363	-1.95515	0.570365	3.29432	-1.03479	0.263963	1.56727	0.380588
SPAC821.05	-0.950865	-8.36606	1.55993	-3.38938	-2.9456	-1.0854	-2.06318	1.93758	1.93758	1.76035	0.918155	-7.48159	-2.19871	-2.07856	0.337282	-0.0101851	1.05906	-0.383066	-5.38622	-17.0309	-5.88279	-1.41001	-19.6194	-5.97369	-5.58575	3.22816	-12.9691	-3.74543	2.09579	-1.64629	-2.80869	-2.31269	-1.91172	3.90426	-9.53554	1.21178	-20.6134	-10.2503	-7.60969	-11.2884	1.78352	-1.53894	-12.609	1.65712	-12.9383	0.781158	-10.1928	0.921953	1.8064
SPAC821.07c	2.92492	-5.30873	2.15681	12.6526	2.46099	4.75214	2.80655	-0.414154	-0.414154	0.0846617	-0.542576	3.20431	3.47288	1.09405	-0.0355345	0.766628	-0.523318	0.38401	3.61715	-4.22427	4.32861	-0.192004	-1.60492	-0.721319	-2.92568	2.62954	-0.776442	-1.30979	-2.01675	-1.29943	-0.779221	-0.962068	1.46054	-1.42787	-2.95303	-0.278601	-4.79248	-1.67005	-4.32637	-0.201507	3.72101	-2.54852	-3.77172	-2.44047	4.71428	1.4442	2.3035	-4.30945	-2.69534
SPAC823.09c	-0.187556	-2.35768	0.684935	-0.893773	-1.59937	-2.28114	0.183165	-0.572208	-0.0589516	-0.587746	-0.0347431	-1.03042	0.177011	-0.76955	-0.223523	-0.372541	-1.01232	-0.335854	-0.597028	-3.23895	-0.672925	-0.290415	1.16186	2.26877	3.71277	-2.11149	1.22229	0.359897	0.00817809	0.0590466	-0.0521319	-2.03914	1.09452	-0.859515	-0.414868	0.164726	1.78773	0.629759	2.46643	0.030989	-1.51841	0.84768	-1.12332	-1.88892	-1.60097	0.8445	-0.539245	0.318396	0.174603
SPAC823.16c	0.992475	-1.42527	1.26386	-7.18634	1.31373	5.97565	-0.877519	-0.839773	-0.684445	-0.905987	-0.388543	0.348588	0.79066	-0.784423	0.243066	0.377262	0.211959	-0.272251	1.52245	1.92517	2.22361	0.303866	1.4383	0.843005	1.96204	4.71683	-0.711065	-0.599277	-0.117956	-0.150268	1.18493	13.3607	-1.66779	-0.306359	0.15463	-1.36495	2.22399	0.623423	2.38472	0.227455	4.19681	1.38876	4.33857	1.73001	6.07273	-1.01459	-0.733305	0.913473	4.37503
SPAC890.03	0.410135	1.84682	-0.671118	5.44226	0.932778	2.10565		2.19394	2.19394	1.62964	0.0131033	0.718729	0.479054	1.29718	0.807875	0.81922	1.71388	0.217662	-1.62835	1.35348	-0.835093	-0.0217655	-10.4164	1.0439	3.34992	-0.982853	0.938948	1.04491	1.17203	0.675686	2.31231	-1.82699	2.35	-0.057865	-0.816728	2.12225	0.714347	-0.20741	0.952707	0.648447	1.8717	0.697441	-1.8675	0.101278	1.16794	-0.659581	1.465	0.457409	-3.07456
SPAC8C9.06c	-14.6647	-43.7449	-20.4334	-8.36676	-21.5653	-8.89787	1.43669	-23.9592	-22.0321	-10.2421	-5.0926	-10.952	-19.5004	21.738	-12.2056	-5.85232	-10.8187	4.60384	-20.7603	-23.2687	-14.6399	1.07067	30.5387	0.887917	23.9548	12.2025	22.0918	-7.48802	46.0996	-8.42149	0.903665	-16.6611	-30.3142	-37.8979	-28.9502	5.66189	-13.2165	-13.8993	-12.8736	-21.5352	-24.7073	32.1783	-32.2853	-8.13668	-24.8382	-12.2012	-39.6606	-20.9732	-7.94128
SPAC8C9.16c	-0.601187	-1.48471	-1.44114	-1.73483	-0.950142	-1.44337	-1.338	0.448441	0.448441	0.484749	0.666551	-1.19011	-0.57414	0.103801	0.269635	-0.117155	0.330896	0.713268	-0.894866	-0.699011	-1.42433	0.270237	0.427244	0.522931	0.910376	0.610111	-2.2622	-1.13348	-0.70396	-1.357	-1.43554	-1.05441	0.753832	2.3643	1.03999	-0.450092	1.77341	0.324278	0.489904	-0.56446	-1.24214	0.678455	0.551372	-0.291748	-0.842244	-0.326097	2.42849	0.745072	0.450505
SPAC8F11.03	0.18101	1.40815	-0.940943	-1.16676	-0.780243	-0.604121	-0.508419	-1.0191	-0.316583	0.210574	-0.00770288	-0.559372	-0.333819	0.439837	-0.204387	-0.205383	0.481377	0.603335	0.520002	0.553455	1.36896	-0.162959	-0.561568	0.836314	-0.945276	1.15645	-0.642904	0.397021	0.0915199	-0.184311	-0.0932957	-0.668514	-0.747974	-1.48379	-1.75832	-0.420567	-1.81642	-0.846892	-0.548252	-0.418062	-1.0811	-0.584222	-0.536229	0.00161383	0.545878	-0.3639	0.546804	-0.0693703	-1.32933
SPAC977.15	0.218102	-0.776605	-1.33554	0.703445	-0.946031	-0.656583	1.75215	0.56257	0.464514	0.72104	-0.0545197	-1.06629	-0.42133	-0.231983	0.0678631	-0.251109	0.0858147	0.0664806	0.427966	-0.705139	-0.493974	0.219371	1.357	0.0489195	-0.167266	0.771731	0.510213	-0.712576	0.422389	-0.998379	-1.43305	-1.0778	-0.488499	-0.688862	1.58198	0.933733	1.18105	0.881121	0.0433564	0.613017	1.51209	1.49674	1.94554	0.52572	0.795903	-0.666851	0.755723	-0.288285	-0.990417
SPACUNK4.13c	1.00933	-1.2149	-1.17976	1.23024	-0.561632	1.0985	1.23162	-0.527618	-0.0683131	0.0564109	-0.6636	-1.20241	0.338943	-0.544479	-0.223816	0.026342	0.59413	-0.370055	0.717157	1.82932	0.935229	-0.211651	0.348769	1.20461	-0.316679	-1.00721	1.15158	0.364258	-1.32681	0.343498	0.661244	-0.124884	-0.355193	-0.838288	0.380964	-0.94042	0.295716	1.48361	0.115719	-1.44668	-1.54748	-1.44562	0.256903	0.381324	2.6678	-0.65189	0.794362	0.594186	-1.25595
SPACUNK4.16c	-1.09182	-4.09681	1.01974	2.26181	-0.635	-0.792615	-2.52883	3.50711	2.22248	1.56991	0.00468176	-3.41142	-0.892146	0.577376	1.82835	0.199573	0.208007	-0.343647	-4.63309	-4.58017	1.73775	-0.337789	7.9686	2.08191	3.85051	-3.54996	1.1893	4.15776	1.06783	2.28746	5.84379	8.30631	-1.57898	-3.08518	-1.20259	0.128304	0.92585	0.927018	0.73629	1.92633	-1.23435	0.572759	0.353835	0.507772	-3.44381	-0.869187	-1.52673	0.962463	1.47197
SPACUNK4.17	0.373891	0.592418	-1.07817	0.667778	-0.661398	0.63256	-1.17674	-0.4554	-0.4554	-0.452857	-0.550707	2.32504	-0.291852	0.498029	-0.131274	-0.284115	-0.526357	-0.530019	0.965436	-0.689471	3.88185	-0.474873	0.671578	1.87791	0.965312	-0.549357	1.05032	0.556686	-0.133009	1.5734	0.459022	-0.967562	0.663144	1.19954	0.392293	0.987465	3.91723	1.74732	5.63636	0.991967	0.722189	1.63001	1.6548	-0.287864	1.86469	1.51562	0.772777	-0.427676	-0.535514
SPAP14E8.05c	-0.0509895	-0.49938	-1.61311	-0.661575	-0.657052	-2.21954	-1.56016	1.14827	0.878482	0.039912	0.109867	-1.73367	0.732378	-0.43088	0.163341	-0.380911	0.201165	0.223433	0.95571	0.691406	0.994571	0.42395	1.05033	0.127611	-1.19167	-1.47383	0.681078	-0.864343	-0.129314	-1.03293	-1.22563	-1.2532	1.13814	0.421456	-0.374986	-0.0613069	-3.24893	-2.25515	-3.60292	0.120932	-0.714472	-0.543524	0.756185	-0.584633	0.687016	0.518172	1.62525	-0.457317	1.19778
SPAP27G11.12	-0.0935996	3.82026	-1.00074	-0.621223	-0.843758	-1.59642	0.437588	-0.875454	-0.211117	0.172521	-0.401209	-2.41624	-0.676172	0.260693	-0.611566	-0.101148	0.50853	-0.103408	0.789862	1.00773	1.78951	0.215433	-1.10965	-3.03676	-6.37266	2.04696	-3.27478	-0.864298	-0.771154	-1.56124	-1.09403	5.73616	1.38219	0.783541	1.56606	-1.49433	1.63028	-0.228741	-0.363453	-1.22282	1.51177	-0.576385	2.37131	-0.62295	1.35019	-1.71716	1.48743	0.927942	1.97503
SPAP8A3.04c	0.657373	0.980198	1.20608	0.522279	-0.295986	0.768271	-0.804874	-0.593493	-0.109822	-0.189553	0.215499	-0.242969	0.167231	-0.363077	-0.0364554	-0.191141	-0.451335	0.177429	0.644597	0.940414	-1.29502	0.194745	-1.48626	-0.0875418	-1.06574	1.60894	0.744469	0.5503	-1.02146	-0.439018	1.2259	2.51399	-0.936063	-0.550647	-0.616366	-0.663139	0.570905	-0.0406095	0.735323	-0.683146	1.2427	0.533957	-0.658096	-0.258583	0.34558	0.669953	0.883128	0.326812	0.225995
SPAPB1A11.02	0.762911	1.38801	-1.41353	-1.43007	0.876092	0.474796	-0.262186	-0.168742	-0.0930479	-0.557147	-0.0674037	0.998755	1.06472	-0.422712	0.498307	-0.0740094	-0.331999	-0.0937091	3.37106	1.62557	2.24238	-0.542407	0.920102	2.34605	1.53255	-0.676502	0.789967	0.717164	-0.600876	-0.183687	1.1558	-2.27156	1.69587	-0.122616	-0.821978	-0.627565	-2.23461	-0.5662	-1.70101	-0.0952167	-1.01821	-1.15974	1.76528	0.174841	3.54232	1.0531	3.4265	-0.630445	-0.803903
SPAPB1E7.11c	1.71175	1.73642	0.604343	1.97243	1.64882	3.71652	1.23402	0.308463	0.308463	-0.363353	0.533497	2.63339	1.22407	-0.58975	0.480001	-0.053947	-0.805276	0.531425	1.58033	2.09362	2.72265	0.990925	1.71596	0.26705	0.530289	1.09313	-1.4033	2.96011	-0.338372	1.61621	2.17464	-2.28154	1.28496	0.0310538	-2.5563	-0.358742	-2.79015	-2.37102	-2.4129	0.896444	1.91236	-1.48392	0.95818	0.671869	3.67713	1.15136	-1.00134	0.931345	-1.0759
SPAPB24D3.08c	-0.325578	0.811425	-0.46963	-1.09447	-0.106463	-1.96636	-0.640168	0.461693	-0.0105076	0.184207	0.273979	-1.88698	-0.674215	0.807327	0.3567	0.133529	0.673351	0.547891	0.632792	1.81699	1.00701	0.400867	0.55731	-0.0431172	0.317353	0.626524	-11.2648	-0.481725	-1.41615	0.370972	-0.227061	0.987066	-0.720308	-0.583077	-0.094727	-0.166328	0.569767	0.241347	0.00243535	-0.0662163	-0.165514	0.503218	0.336447	0.581481	0.581253	-0.270344	1.34152	-0.683988	-1.01673
SPAPB2B4.07	0.54996	0.90204	1.07411	-5.96447	0.437088	-0.794413	2.17956	-1.176	0.0373459	-0.0534606	0.496928	-1.83333	-0.296716	0.450533	-0.276774	0.237063	-1.29476	1.13321	1.7052	2.30182	1.87663	1.26285	-0.644077	1.81856	3.10752	0.477443	4.16189	0.804385	1.907	0.36571	0.85379	-6.46001	3.77876	-2.30037	-0.876776	0.501793	-4.09487	-0.916872	-3.44943	-0.145427	-0.840508	1.22341	-1.82102	-0.507752	2.95227	-0.534537	-3.86539	2.42449	-1.96443
SPBC106.10	0.429791	-4.5918	-1.26922	-4.56657	-2.35793	-0.6765	-4.12439	-2.6797	-1.60758	-0.108056	-0.0543005	-8.28758	-0.831235	-2.31211	-2.04708	-0.874275	-0.24148	-0.814311	-5.51943	-17.2947	-7.34362	-1.53625	-17.9303	-11.3029	-6.04969	-3.12577	-12.2155	-3.79459	-0.563355	-2.11703	-2.29446	-2.1198	-2.18955	5.73092	-8.91994	1.55583	-21.5767	-12.9785	-7.40189	-4.63976	1.23639	3.16504	-13.5355	0.566961	-11.8749	-0.68476	-0.896141	-1.84101	2.06197
SPBC1105.05	-2.64997	1.89654	-1.45487	1.31563	-1.69493	-2.92834	-1.73388	-1.06448	-0.919111	-0.306782	-1.70829	3.36551	-2.18989	-1.81659	-1.2746	-1.12544	0.973111	-1.40722	1.96104	-3.04455	-8.13596	-2.17178	3.86516	-1.79002	3.92752	-4.42676	-1.91037	-2.55699	-2.94245	-3.03751	-2.66447	3.62603	-3.7243	3.79111	5.37818	1.67449	2.85539	-0.895829	0.0327525	-1.58167	-1.17703	1.84712	3.99609	-1.56837	2.59833	3.29775	1.43869	0.122302	0.915794
SPBC1105.14	3.00914	-6.5348	-3.73181	17.9929	-0.864562	5.12925	11.2696	0.748834	0.334287	-0.624843	-2.2167	6.69122	3.4831	-1.72315	0.699433	0.482318	0.429752	-1.26146	-2.65575	0.904653	7.49412	-0.14271	8.36014	2.34254	4.44366	-19.9473	-3.822	-2.20146	2.15919	-0.951992	-1.00543	6.73929	-2.01486	-17.2625	-17.5102	-2.47771	-0.841949	3.23982	-1.91741	0.944024	11.02	-4.30507	-6.88047	0.593559	9.48576	1.18888	-1.23813	-0.349274	2.20408
SPBC119.03	0.351683	1.30504	0.642586	0.606309	0.308409	-2.00832	-0.124618	0.389571	-0.126318	0.648446	0.187136	0.620404	0.298078	-0.256823	0.272843	0.0576399	0.605806	0.822943	0.683519	0.515955	0.818008	0.746515	2.71382	2.2643	0.776866	0.782068	2.41292	0.851639	-0.0106201	-0.448577	-0.590061	-2.49566	-0.776148	1.49226	-0.0877297	0.614931	-0.0881984	0.868441	0.409771	0.065669	-0.502724	1.2112	2.71218	-0.0620472	1.90598	0.403458	0.517761	0.394738	0.210836
SPBC119.16c	-0.625316	1.49425	0.80541	1.06477	0.628565	-1.09697	2.08129	0.289057	-0.116283	0.21345	0.250209	0.71865	-1.22025	0.484104	0.240297	0.304995	0.299398	-0.108849	2.40747	4.35416	0.972464	-0.0610293	1.28115	1.61475	0.930102	0.931443	2.41151	0.20011	0.0897241	1.23184	1.08671	2.44392	1.09389	1.08495	2.95016	-0.539454	2.38175	0.954548	1.84535	-0.62895	0.379195	0.798769	2.17644	0.339074	1.01594	-1.22811	-1.0505	0.965995	0.611807
SPBC1198.07c	-0.123201	-1.75869	1.12841	-1.35537	0.166528	0.432334	0.852309	0.562167	-0.0447054	0.00646745	0.0038573	6.96039	0.275021	-0.327806	0.253252	0.324639	0.0685555	0.58538	0.389673	-0.509467	1.24594	0.578658	-1.02498	-3.87073	-0.648674	-1.50388	5.89384	0.653138	2.02555	-0.352641	-0.0224227	4.31625	0.546646	-0.0731162	0.300055	0.126989	1.94063	0.817032	0.640257	-0.0590093	1.50164	0.145785	-0.428641	-0.0751142	2.03839	0.352391	-0.574729	-0.145872	1.52623
SPBC1198.11c	-4.78203	-2.30196	1.17178	1.75986	0.857152	5.06384	1.39137	-6.05492	-4.56612	-3.36174	-2.14861	2.18342	-5.21964	-2.57544	-3.01293	-0.831203	-1.63218	-0.478919	-2.25171	-1.82427	-0.937239	0.158738	4.83374	-6.79429	-4.6511	1.63423	13.2703	-1.20483	3.90959	1.70498	0.375107	1.35487	-1.53464	1.67284	-1.59391	0.531401	-7.19032	-1.59859	-7.24742	-11.6491	-4.31121	3.03071	11.7653	2.43121	5.21489	1.91572	-6.02113	2.27009	12.9355
SPBC1198.14c	0.56213	-5.8738	0.559816	-0.649494	1.15296	3.63855	4.6023	0.683187	0.648044	-0.0510231	-0.261508	-2.14006	0.575912	0.184982	0.451427	0.285635	0.264301	0.206557	1.20943	-1.84415	3.86156	-0.0608612	0.624531	2.44346	1.41314	0.561306	1.3842	-0.168165	-0.754066	-0.204659	0.205447	27.4688	-1.00255	-0.648465	0.57813	-0.782056	0.931103	0.291822	-0.0669626	-0.305194	4.63417	-1.38643	-1.26604	0.848735	3.02738	-0.78428	-2.98033	-1.33073	-0.970099
SPBC11B10.10c	-5.7822	-12.7085	-2.22612	7.03931	-1.17757	-0.891977		4.07402	3.04985	0.859689	0.19079	-11.9716	-2.68395	1.36634	1.21933	1.08997	-1.20328	1.28847	0.885248	-6.03779	-3.22405	1.17432	-3.91451	-14.8083	-6.5971	-4.76856	-8.89042	1.91735	-0.137575	-0.424717	-0.341683	7.37547	3.55093	3.7318	-3.62124	1.76365	-15.011	-11.7087	-8.07193	1.97704	6.14755	-3.72261	9.55791	-3.49932	-3.34662	-3.38375	-14.1863	1.91566	4.9101
SPBC14C8.15	-0.278829	2.61834	-0.824615	0.746066	-0.378694	0.854301	0.851785	-0.923721	-0.199097	-0.422558	0.381091	1.41585	-1.73031	-0.31418	-0.0254468	-0.363277	-0.277692	0.485191	0.392529	1.01714	2.07842	0.308321	1.06049	0.162816	1.1895	-2.75172	2.07894	-0.692453	-0.129714	0.0921476	0.756245	7.82728	0.922481	-0.110956	-0.10871	-0.388944	2.21304	2.3702	1.82064	0.392568	-1.12576	-1.24673	-0.88737	0.17799	-3.49865	1.0518	1.95176	0.881224	1.62873
SPBC14C8.16c	-0.401272	-8.77587	-1.17353	-7.30934	-1.87832	-1.23418	-5.09105	-3.78308	-2.28126	-1.26013	0.300324	-7.81231	-1.01684	0.627266	-2.36426	-0.824517	-1.44516	0.253979	-5.77546	-19.2575	-6.48688	-0.0992287	-18.0116	-8.68411	2.58033	-1.06938	-13.1198	-1.98267	0.811064	-2.12976	-2.13856	-4.34771	-2.23452	4.67001	-11.2159	-0.514306	-20.7587	-14.1376	-9.97129	-9.94655	-1.82579	3.17178	-14.7914	0.902807	-8.06547	-0.6043	-1.45185	-3.48513	0.978329
SPBC14F5.10c	1.45561	2.15566	0.973245	-0.83178	0.103697	0.668873	1.59194	0.132819	0.132819	0.676503	0.378669	-0.835782	1.00369	-1.3931	-0.506978	-0.196986	1.30652	-0.0279821	1.06619	-2.73277	-2.36869	0.773216	-1.50736	-0.150379	1.01796	-5.86385	-2.21645	0.286398	-0.346751	-0.388112	0.102652	4.9553	1.99504	-0.553074	-1.18335	0.128977	-1.36492	-0.593773	-0.754671	0.362249	2.98494	0.801159	-6.53336	-0.704032	-1.60836	-0.685536	1.63711	-1.4884	-2.84282
SPBC1539.02	-0.299631	-1.03374	1.26481	0.591582	-0.506103	-3.58651	-0.383886	0.319237	0.0812602	0.212567	-0.2455	0.947383	-0.70735	-0.393731	0.0688952	-0.275589	0.0853034	-0.560098	-0.581497	-0.916721	-3.11165	-0.357377	0.924551	-0.252289	-1.02412	-0.844117	-1.06746	0.487867	0.449945	0.321961	0.742718	1.24274	-0.787835	-0.0903729	-0.444262	-0.279373	1.32798	1.40771	1.74027	0.71737	0.502322	0.698093	0.26021	-0.750049	-0.532339	-0.706763	-0.400577	1.26651	0.940154
SPBC15C4.06c	0.340712	1.2262	-0.753096	1.61878	0.798685	0.539007	3.70418	0.222483	-0.0166759	0.661573	0.463894	0.126743	-0.35786	1.36402	0.6556	-0.227554	0.0851901	0.211506	0.607343	0.784687	-0.745317	0.921412	-1.03788	-0.478864	-0.773965	0.590899	2.7813	0.588101	-0.701028	0.598897	1.58485	1.75612	0.616998	-1.6068	0.187512	-0.850484	1.45124	0.696418	2.30493	0.178619	1.18433	0.944956	-0.788002	0.367282	1.17735	0.685085	3.49057	-0.366983	-0.827692
SPBC15D4.05	-0.263907	2.2111	-2.52367	-4.70353	-0.793047	3.77578	-1.18263	0.762209	0.762209	-0.165455	0.0955298	-1.54672	-0.251278	-0.26945	0.0472905	0.169327	-0.375051	-0.271912	-0.527785	-1.00054	0.883618	0	1.98384	0.382644	1.83195	2.19902	-2.95372	0.762542	0	0.861385	-0.236688	-2.0394	-1.38936	0.128857	2.33537	-1.13401	0.895951	1.02559	0.620941	0.209137	-4.79078	-1.96086	4.51623	0	-3.2809	-0.615986	-3.27521	-0.721185	-1.70306
SPBC1604.16c	0.286385	0.937385	1.16152	0.518234	0.0651772	-1.31629	0.63178	1.1475	0.605243	0.985935	0.700713	1.33119	0.275517	0.565001	0.072231	0.146337	0.956027	0.962069	1.3751	0.944126	1.24455	1.13609	-0.85072	0.184841	1.58647	-1.14782	-0.416479	-0.137691	0.816023	0.316778	0.583701	-1.20852	-1.1037	0.991263	0.196586	-0.617281	0.384296	-0.49742	0.85759	-0.0910741	-0.761923	1.39455	-1.36688	0.144555	1.10888	0.404822	0.443066	0.339112	-0.409484
SPBC16A3.02c	0.786209	0.53348	-1.13144	-2.23749	1.38674	0.62544	0.550886	0.503643	0.503643	0.147015	0.745926	-0.8214	0.350104	0.811597	-0.321577	0.112675	0.427658	1.27205	0.676599	1.63944	1.81557	0.714003	1.30036	-0.227873	-0.889774	-1.30269	0.836142	0.800984	-0.143446	0.0946507	1.19601	-2.50864	0.837697	-0.133423	-0.799239	0.347689	-4.83751	-2.10136	-4.29264	-0.512182	-0.656992	-1.11075	-1.58056	-0.202601	4.09534	-0.675888	-0.213243	0.617989	-1.99074
SPBC16A3.08c	-3.14474	5.14928	-3.337	-3.92138	-0.647422	3.03325	-2.25939	2.61761	2.00831	0.46107	0.0327851	1.78636	-3.2762	-2.2832	1.30778	1.08316	0.453647	0.831135	-2.39262	5.41424	5.64138	1.23232	3.36951	-4.69352	-2.51227	4.17436	-7.61809	-4.56919	2.14304	-5.14013	-3.49245	-18.2117	-0.805821	-0.458413	1.18064	1.81766	-3.37345	1.0726	-4.10499	0.482982	4.16234	-3.93902	7.41156	-0.650605	-15.1329	1.81826	-3.00903	1.47317	3.34299
SPBC16C6.01c	1.10266	1.39058	-2.81836	-3.1606	-1.87274	-3.27674	-2.61001	0.630932	0.630932	0.607371	-0.808346	-1.53083	1.12747	1.20782	0.225066	0.331149	0.51563	-0.400721	1.18901	-2.04705	1.3355	-0.852618	1.50042	4.47609	7.38114	2.70574	-8.73158	1.56957	-0.478301	2.15628	2.49371	-1.57889	2.60951	0.298456	0.824742	-1.67418	-1.75741	-0.852482	-0.672631	-2.36923	6.65115	-1.19025	-1.1464	0.652649	5.83804	1.55457	3.01548	-0.726607	2.51297
SPBC16D10.08c	-2.2388	5.00186	-1.38433	-1.3614	1.7594	-1.92805	3.15517	0.959349	0.959349	-0.0692792	0.928376	-19.3896	-1.68477	1.09239	-0.378953	-0.098593	0.267327	-0.036127	-1.75531	3.40272	2.6998	1.04617	-4.95969	-1.37836	-4.80494	1.09414	-11.4627	0.763643	0.491454	0.923981	-0.690557	-4.46712	2.30416	1.26526	2.69149	1.01214	3.93648	2.25262	3.43014	1.84884	-2.53105	1.66833	1.15214	-1.82773	3.23807	1.10547	1.53561	1.63048	3.72045
SPBC16E9.13	0.66639	-3.85172	1.87736	-7.39912	1.01992	1.61235	0.0232947	1.82267	1.82267	1.17441	1.02067	4.19298	-0.308464	0.954479	-0.2789	0.574867	0.271641	0.735895	2.33308	-1.66203	-2.62475	0.387554	-1.85788	-6.59572	-2.62489	5.71047	14.0499	1.5092	0.73993	-1.01844	1.12143	18.3335	-2.03567	-1.22381	-0.093698	-1.71646	-4.70235	-1.47655	-2.99367	-6.00193	0.771354	-1.44985	-3.75285	-1.55771	9.35262	-1.03908	-0.682206	-0.915415	-0.898325
SPBC16E9.16c	0.774493	-2.81902	1.04418	-2.35875	0.353252	1.20675	-0.731774	-0.704661	-0.704661	-0.189301	-1.23479	-1.61726	0.430134	-0.845748	-0.328016	0.450603	-0.0384277	-0.876245	1.62225	-1.80963	1.36751	-0.685807	1.69307	0.682188	-0.875011	-0.904815	1.05977	1.1466	1.18699	-0.428384	0.666956	-3.51566	-0.235311	-0.820344	-1.84331	-1.0076	-1.20171	-0.214877	-1.06329	-0.372078	1.18765	-0.519377	1.33066	2.05132	0.500081	-0.795018	-1.24976	0.483541	-1.17244
SPBC16H5.13	0.845225	-6.14316	1.38323	-10.2809	-0.297394	1.43151	0.233363	-0.668654	-0.668654	-0.928783	-0.651096	3.98933	0.743216	1.62912	0.660246	0.125924	-0.436193	0.956386	2.71312	6.30997	4.37779	2.0662	-10.4509	-1.44469	0.880818	1.80737	3.84678	-1.02285	1.3269	-0.932402	-0.279053	-5.27134	2.46561	-2.80992	-2.54986	-1.1898	1.50616	4.33434	1.4965	0.0757323	-3.62577	-0.490058	0.642215	1.93154	9.00447	-1.21011	-2.74734	2.35082	1.95979
SPBC16H5.14c	0.916918	-1.76021	-0.999604	2.99476	1.04555	-2.77327	-0.060144	-0.595694	-0.595694	-0.231487	0.22509	-1.35414	0.887846	-0.841082	-0.159577	-0.362914	-0.580706	-0.00777946	0.795643	3.36643	-0.704084	1.16267	6.08646	4.45717	1.05618	-2.19511	-0.71155	2.4451	-0.366887	0.187414	0.915981	1.48324	-0.684543	-0.0175173	-1.14297	1.1599	-3.27921	-1.68701	-3.26129	0.328627	-2.36087	1.1082	1.41089	-0.122824	2.01071	-0.940416	-0.658338	2.83856	0.508454
SPBC1709.09	-0.381315	4.29192	0.95294	2.03034	1.36588	4.8283	0.899822	-3.43256	-3.43256	-4.02666	-1.0611	1.60828	-0.69052	-1.91788	-2.19414	-1.62776	-2.6175	-0.334767	1.68095	4.30743	3.97707	1.15515	3.08246	2.4587	-5.04953	2.05896	3.45088	-1.98216	0.0684562	-1.92614	-0.268692	-3.37959	-2.20931	-1.7518	-1.94593	-1.40193	-3.74727	-1.84339	-3.49314	-5.42486	4.66317	-1.42051	3.12918	1.1755	2.04361	-0.671303	2.47301	0.839379	1.7761
SPBC1778.07	0.291187	1.79084	0.905066	-4.49238	1.30828	2.12618	-0.512841	1.05396	1.04342	0.0198317	-0.262448	-1.41427	0.240631	0.889059	0.497708	0.716898	0.0272557	0.0394919	1.41179	1.60535	4.15803	0.444268	1.993	1.45863	-1.09571	-0.220062	2.13453	0.496277	-0.0308499	0.473866	1.07056	-3.43383	0.944068	-1.0443	-2.37461	1.37458	-0.930435	0.120637	-0.0433116	0.872055	1.05978	-0.68775	-1.89351	1.9875	0.960331	-1.15829	-0.364888	0.961877	0.675404
SPBC17G9.07	-4.50068	-1.79619	-2.39226	-3.1583	-5.32649	2.54103	0.733416	2.7385	1.91673	0.943578	-1.38984	-10.4239	-3.03853	-3.67507	1.92706	2.05009	0.117335	1.33373	-8.55744	-16.2183	-4.39497	1.06386	-14.2307	-4.97448	3.98482	5.68441	-13.232	-3.66449	1.82736	-0.298844	0.293514	-4.50163	4.47936	7.1402	-5.45018	2.09826	-14.7519	-3.65655	-9.54334	-6.05563	1.32249	-3.96057	-13.8862	2.63637	-13.74	0.437942	-7.81156	-0.564233	7.46756
SPBC17G9.09	0.385443	2.90643	0.627804	1.37341	0.675263	1.4873	0.970375	-0.816232	-0.288289	-0.0716	-0.222799	2.75345	0.157327	-0.682214	-0.0502244	-0.0965611	0.223982	-0.269509	0.99804	0.595802	3.98193	-0.300885	2.77078	0.258504	1.81898	-0.802772	1.37499	-0.519649	-0.759601	1.59912	0.26985	-2.73105	1.48217	0.507721	-0.218594	1.34665	1.02045	1.56145	0.43655	1.06632	-0.526685	0.663226	-0.552814	1.16178	3.62924	0.983904	0.536349	0.525464	-0.375932
SPBC1861.02	1.89466	-2.58984	1.42676	14.0499	1.91451	4.4605	1.5163	-1.7561	-1.10206	-1.10448	-1.07984	6.51058	1.39872	-1.48911	0.292566	-0.49031	-1.04625	-0.978171	2.65262	-6.61942	3.44267	-1.14187	-4.25402	-3.16513	2.07167	12.9636	1.71247	-3.2776	-2.46363	-1.60559	-1.66042	2.58292	-1.03386	0.641834	1.09345	-0.576057	-1.82948	-0.507921	-1.30109	-1.39527	7.67916	-3.12777	-5.23583	-1.77609	-4.6945	2.92258	3.4299	-0.598181	-1.48803
SPBC18A7.01	0.0279096	0.870597	-0.51046	1.1869	0.8045	0.765874	0.0762211	0.646325	0.646325	0.268989	-0.271887	0.99733	0.143715	-0.332177	0.325579	-0.0356332	0.0332665	-0.373391	-0.434151	0.343299	-0.896936	-0.376823	1.36889	1.93478	1.44975	-0.287426	-0.157302	0.528626	-0.336102	0.501219	0.39468	2.28429	-0.723555	0.383081	-0.181154	-0.309132	0.821423	0.552009	0.309908	0.512678	-0.743249	-0.478108	-1.3554	-0.108298	1.057	-0.665474	3.44981	-0.348006	-0.849242
SPBC18E5.10	-0.544165	1.56333	1.58812	-2.37607	-0.325452	-2.01249	-2.17684	0.163822	-0.0717019	-0.214628	1.10917	-4.07397	-0.880632	0.56068	0.0483041	-0.490844	0.464367	1.04736	-1.13419	-8.84309	-7.47208	0.800422	0.953178	-0.336198	1.78663	0.698224	-4.02527	-3.15401	1.87899	-0.250948	-0.795701	-0.93583	1.31828	0.327209	0.540356	0.473279	0.205284	-0.280857	1.65395	-1.1264	-1.28702	-2.58918	-4.53612	-0.313781	-4.86765	-0.568288	-1.79114	-4.06302	-1.12771
SPBC18H10.02	-5.26158	1.84636	-9.23252	-11.2295	-10.5594	-6.06537	-8.02771	-0.248758	-0.248758	-0.588048	1.40637	5.01166	-6.88236	-4.07834	0.393389	-1.90066	3.05622	0.0372401	1.5592	-12.0276	-8.75015	-2.21463	21.1755	-10.1463	2.76371	2.23523	-6.75316	-5.53301	-7.41969	-10.7599	-4.39518	15.5609	-9.80478	3.64069	-7.99636	-8.18523	-7.02674	-9.17942	-5.89316	-3.20523	-3.70169	-4.11033	-13.6326	-4.00904	-7.34809	-3.87081	-12.3868	-4.6975	-9.82091
SPBC18H10.04c	-0.8653	-8.4251	3.40251	4.82167	-1.30289	-3.19973	3.42945	-2.80385	-2.80385	-1.92212	-0.769406	6.5803	2.57752	-1.96762	0.329352	-0.0841056	-1.75412	-1.48994	3.89441	-4.13626	11.3047	-1.20077	2.20866	7.1234	9.10399	13.0315	-3.40925	-4.43178	-0.638475	-3.33665	-1.58449	6.41979	-2.98099	-1.30603	2.34935	2.3803	6.33912	8.32204	9.0795	1.2006	113.251	-3.45831	-13.3211	0.884546	-10.5587	-0.823243	4.68449	-2.96645	3.87995
SPBC18H10.05	0.498418	-0.971109	-1.21206	0.914314	-1.04544	-4.71858	1.27579	-0.502502	-0.408887	-0.574158	0.21908	1.68384	0.537135	-0.50153	-0.29092	0.0294262	-0.320201	0.0960564	-0.660865	-0.490912	2.96336	-0.270132	-1.16953	1.68043	0.533945	-2.51173	-2.29807	-1.7183	-0.890498	-1.38452	-1.53582	-1.7736	0.982095	-1.14644	0.414824	-0.637261	0.619522	-0.00889796	-0.213755	0.889371	1.05048	-1.20507	2.51638	-0.6973	3.11882	1.44002	2.10043	-0.705262	1.0915
SPBC19C7.01	-0.104495	-0.315	0.625778	2.71411	0.227539	-0.568435		0.578173	0.578173	-0.119643	0.181106	2.55283	0.158079	-0.375233	0.13008	0.08818	-0.288904	0.075067	0.366365	3.20244	2.17085	0.145328	1.88479	-0.052896	0.482732	5.2175	5.96628	-0.441702	-0.36066	1.29394	-0.94838	-5.6257	1.64514	-0.349785	1.25372	1.31289	1.4142	-0.450374	0.322159	0.845719	-0.861072	-1.46147	-0.743982	-0.574078	7.18456	0.937436	2.23983	0.24418	-0.0662416
SPBC1D7.03	-3.60202	4.44513	-0.524956	-8.42232	0.467389	-3.46154	0.989748	-0.525937	-0.525937	0.23164	1.45225	-9.85545	-4.00581	-2.38682	-0.297737	-0.560778	-0.854815	-0.140236	0.994593	4.06729	-7.69468	-0.282006	3.21585	-9.61791	-6.47102	-7.51992	-8.78778	-5.70548	0.580436	-5.90078	1.00121	-20.4981	-3.25839	-0.0957622	3.82125	2.45505	3.68516	4.09605	1.98091	-0.3105	-8.10022	-1.33717	-6.66512	-3.86	-36.3799	-1.25461	-2.70586	2.06188	-2.28895
SPBC20F10.02c	-0.284938	0.750202	0.574721	-0.420825	0.717684	1.2142	-0.63826	-0.469497	0.115157	0.128241	-0.333155	-1.6367	-0.0623536	-0.0538049	0.0656428	-0.0578415	-0.331603	0.168837	-0.340351	1.02846	-0.821879	-0.192714	-1.02667	-2.96714	1.30976	-2.25674	0.839297	-0.24074	0.886025	-0.00111288	-0.100188	-1.67908	-0.570936	0.0935524	0.208558	-0.248756	0.809814	0.551698	-0.343722	-0.110012	1.70554	0.169618	-1.3162	-0.411454	0.719865	0.27928	1.10443	1.8303	-1.71894
SPBC20F10.03	0.149122	0.622135	-0.921806	0.682579	-0.68618	0.859121	-1.55937	-0.178568	-0.00799314	0.666219	0.14208	0.84243	-0.971576	0.726955	0.0499377	0.27739	0.305595	-0.384885	-0.487761	1.03894	1.61861	-0.19092	-1.3175	0.540577	-1.18786	1.45711	0.885564	-0.567052	-0.0279204	-0.419357	0.753297	-5.63553	1.12702	-1.54227	-0.0896378	-0.290542	1.86664	1.83188	1.44711	-0.355157	1.18054	-0.659626	-0.502652	-0.215021	0.731837	0.277195	1.99585	-0.0818185	-0.910555
SPBC21.03c	-0.690845	4.58899	-0.900041	-5.77322	0.884304	-0.749589	0.475305	-0.840143	-0.109484	0.0689281	-0.396902	-2.91523	-0.637932	-0.958331	-0.30971	-0.0117953	-0.179885	0.190756	1.14425	3.35818	2.34883	0.461804	-1.5236	-0.439126	-1.57245	-0.349867	-2.5846	-0.905465	0.972269	-0.183187	0.676035	-4.36018	-1.04407	-0.194829	-2.2857	-0.482234	-4.12435	-1.1151	-4.1153	0.925041	-7.21672	1.2823	-2.71314	0.0317239	5.12312	-0.675711	-0.734013	1.34496	-0.631102
SPBC215.05	-1.3187	-4.92741	2.29286	1.65986	3.15151	5.39603	18.6526	-4.6819	-4.6819	-2.93239	2.16687	13.4882	-0.586753	0.942645	0.532077	-1.62786	-0.983372	1.62228	-9.34081	-10.8059	3.80024	0.609895	1.72786	-12.4597	-14.3343	-3.83389	1.30782	-2.61517	2.3217	-6.30285	-0.248564	12.9727	-5.16271	0.376765	-3.79548	3.43962	-7.25588	1.7375	-1.77217	-11.6319	3.17556	-7.24913	6.32238	4.41259	-6.08693	2.46843	-5.7176	-1.26913	6.22126
SPBC215.06c	-0.234441	0.464888	-0.768598	0.697059	-0.515654	-1.67795	0.336127	1.91036	1.91036	1.54115	0.657604	-1.09077	-0.767983	1.1957	0.26843	0.407896	1.79682	0.102224	0.739896	2.54819	0.890769	0.203623	2.84628	0.881873	2.61423	-4.0311	-0.940455	-0.436839	-1.38576	0.0433492	0.0219428	1.04156	1.16462	-0.618182	1.25274	-0.274788	0.843806	1.99143	0.216491	0.525054	-1.22807	1.25504	1.21183	0.156503	0.975662	0.269878	1.74583	-0.467809	2.62631
SPBC21C3.03	0.337978	1.83341	-1.86795	-2.1847	-2.50723	-4.3701	-4.14375	-6.52754	-4.87411	-1.17127	0.46374	1.8434	0.454501	-2.32215	-1.2736	-0.142872	0.545444	1.23837	-3.08834	1.77602	2.1553	1.52785	-4.24288	1.85397	-1.82322	1.04544	1.18982	-4.83297	-0.0234481	-4.34137	-2.82016	-1.90344	1.31428	1.52968	4.98034	2.05762	2.26744	-5.99638	2.86866	-0.0896314	7.03583	0.968318	4.20198	-2.29069	-1.40137	3.06567	0.616082	2.00732	-5.17904
SPBC21C3.08c	0.254937	0.452981	1.35882	1.0171	-0.511358	-0.666264	-2.20239	0.436096	0.409163	0.489217	0.350278	2.73219	-0.300786	0.475335	-0.168908	0.0848888	-0.112096	-0.02912	0.350598	-0.487072	-0.798738	0.241502	-1.17301	-0.493384	-0.323694	-0.611805	-0.342365	1.19699	0.196668	-0.165047	0.230648	-1.98149	1.61067	-0.341844	0.2615	-0.652906	-1.71921	0.170127	-0.35891	0.161852	-1.04635	-1.18832	1.12247	-0.288354	2.41431	-0.737409	-0.440827	1.3698	-0.83435
SPBC21C3.14c	0.555485	-1.6028	-0.882947	2.04449	0.577911	0.176491	-1.07428	1.39162	0.544474	0.240861	-0.0785797	4.39542	0.426262	-0.563293	0.567393	0.295252	0.0100148	0.0841558	0.924733	-2.24855	0.662253	0.451753	-1.70822	1.46964	1.42816	-0.738315	3.52515	2.95807	-0.41608	2.22331	4.41094	6.3673	0.789222	-0.30244	-2.31692	0.267279	-0.810543	-0.139671	0.264691	1.78362	3.72058	1.26128	-5.4701	-0.0980921	-0.969231	-1.27754	1.14493	0.324903	-1.86386
SPBC21C3.18	0.8522	-0.901221	-0.661928	0.649505	2.1523	1.19419	2.01155	0.472569	0.178699	0.140934	0.114429	-1.29191	0.653401	-0.653046	-0.397183	0.343131	0.547628	-0.337721	1.07551	1.88379	2.23188	0.125917	1.60139	0.859371	-0.983141	0.591265	1.5631	1.19081	-0.313955	0.210981	0.575342	-2.82004	1.00095	0.6335	-0.924642	0.223484	-3.8251	-0.677112	-2.76175	0.156842	0.842091	-0.757004	-1.63832	0.130442	2.7709	1.51516	1.27997	-0.48559	0.794235
SPBC25B2.04c	-2.48077	3.72762	2.63836	3.9018	1.13824	-4.30329	1.61284	-5.81049	-4.09123	-2.8476	-1.32775	3.56981	-3.67106	-2.53828	-3.89743	-1.54361	-2.87571	-0.253391	1.16037	3.81689	7.01863	2.11081	-1.01198	-0.653079	-4.6776	5.41934	8.38488	-4.1137	2.00064	-6.34761	-1.76259	5.28821	-2.92778	-0.757212	1.37492	-0.295691	3.59226	2.15814	6.22504	-10.3515	2.34848	1.31222	4.80591	-0.0359538	2.76357	3.44442	-2.3902	3.9317	6.64676
SPBC25H2.14	0.679955	-3.23372	-1.22263	-1.91061	1.12619	-2.94215	2.02808	0.27533	0.27533	0.311819	-0.162871	0.435475	1.39377	-0.709617	0.0773971	0.0033348	-0.472375	-1.14733	1.39088	-0.715209	0.937746	-0.722914	2.29006	0.247144	-0.660028	-1.43942	-0.644555	1.21767	-0.354735	1.9813	4.06734	-2.86017	1.26936	-2.28294	-0.707105	-1.57621	-2.76617	-0.756976	-3.07597	-0.33916	2.41427	-1.07925	0.490353	0.826487	4.14552	-1.31547	1.79676	0.752564	-4.54669
SPBC28F2.03	-0.551425	-5.32617	-1.76509	-3.72778	1.37628	-2.30511	-2.70647	1.11855	0.078643	0.317825	0.377244	5.4605	0.38274	0.570503	0.109821	-0.312953	-0.25869	0.536903	0.899149	3.01201	1.82982	0.530249	2.67347	6.52181	6.5834	-4.31471	-0.800786	1.41037	-2.81964	-0.53872	-0.33642	1.00801	-1.81081	-2.83345	-1.81004	0.234833	-1.80993	-1.30968	-2.21448	1.51018	-2.68069	0.611338	-4.17951	-0.856755	3.16043	-1.74286	1.20622	0.760781	-1.66311
SPBC2D10.03c	0.378397	1.40901	-0.417476	0.335375	0.221357	1.71003	-3.7786	1.69403	1.46868	1.19096	1.79669	2.3058	0.354303	0.376269	0.844032	1.16819	0.883525	1.36247	0.926225	-0.587492	-1.23517	1.33796	1.36227	1.78097	1.0524	0.78295	1.70976	1.01541	-0.569579	1.0377	0.605291	2.21189	-0.712379	0.920213	0.355081	-0.519547	0.700574	1.03138	1.1462	-0.310527	-1.76327	-0.692329	-1.96642	-0.631388	-0.821221	0.937865	0.507625	-0.193857	-1.16301
SPBC2D10.05	0.23118	-5.18943	0.393719	0.658881	-0.636133	-1.08415	2.20298	-0.9285	-0.827004	-0.384738	0.466531	0.266878	-0.343675	0.448751	-0.165687	-0.420788	-0.33386	-0.108945	-0.590552	0.237831	1.96491	0.207744	1.86558	-0.778514	-0.36374	-0.121203	1.05011	-1.30529	-1.21148	-0.72202	-0.107477	1.51822	1.08039	-0.780027	-0.967709	0.238647	1.08287	0.87736	0.672903	0.064406	1.28575	-0.731508	-0.46654	0.569986	1.11024	-0.231919	0.632177	0.209656	1.04759
SPBC2G2.06c	-0.412485	2.32382	-1.52299	-1.47503	-1.0611	1.02704	0.356086	1.24679	0.392727	0.228529	0.430722	-2.79353	-0.427507	1.16401	0.483244	0.23234	0.482735	-0.00506473	-0.295474	-1.5322	0.595229	0.270376	4.58293	-2.98329	1.63103	-2.38078	-6.81916	2.05792	0.744929	1.75377	1.3322	-13.8022	2.00719	-0.310401	0.982851	0.169112	0.510808	1.0365	0.563093	-0.307245	1.44183	-1.39176	0.510691	-0.260686	-6.20878	0.623257	-0.859724	0.418799	0.941238
SPBC30D10.10c	-0.511868	-5.22007	2.43976	-5.01498	-4.16058	-3.78972	-4.32146	-3.12515	-3.12515	-1.1757	0.38525	-9.11258	-1.54804	2.43963	-0.679701	-0.763719	-0.427904	-1.6786	-7.32553	-18.0739	-8.33753	-1.7708	-19.3201	-11.9516	-6.49658	0.975994	-12.6413	-2.85339	0.757697	-1.91629	-2.25797	-5.14468	-5.16408	3.97384	-10.336	0.704907	-20.8105	-13.4153	-8.87515	-8.62556	2.36907	4.54937	-12.3494	0.312123	-14.7925	1.35477	-4.91839	-4.93297	3.69805
SPBC30D10.13c	0.221339	24.6506	2.12429	2.72564	-1.07307	0.341079	1.09501	1.66565	1.66565	-0.127376	-1.268	4.85997	-9.49469	1.6352	0.839742	0.220807	-0.49336	0.488227	-4.14756	3.06403	3.39859	-0.282762	-0.751461	2.03693	6.38484	0.543274	1.98917	0.732656	1.08368	-0.207011	-0.104786	-0.757372	-2.34348	-1.60479	-4.40824	-1.02525	-3.41943	0.206698	1.02709	-0.384682	1.98782	-1.48235	4.52339	0.539479	1.57066	-1.481	-2.07518	7.52667	-0.878472
SPBC31E1.01c	0.357932	-1.13751	1.86771	-6.58767	1.35095	10.8561	1.0764	-0.951778	-0.842723	-0.960881	-0.783576	1.50037	0.356134	0.268529	-0.208852	-0.0349771	-0.209371	-0.35072	1.5894	-0.42056	3.10246	-0.108857	-0.284434	1.15473	0.633272	2.6711	0.379263	0.721857	0.906123	0.895797	2.37487	14.7916	-1.2652	-1.44761	0.760196	2.04485	1.46772	1.13401	0.873539	-1.2346	4.92693	1.10162	3.49433	0.969514	4.27438	-0.592568	-1.6673	1.61338	6.14385
SPBC32F12.03c	0.375923	-2.42631	-1.49474	-1.20618	-0.496713	1.55249	-1.83982	-2.14333	-2.14333	-1.09065	-0.415039	-0.557262	-0.367098	0.778159	-0.710613	-0.276503	-1.09101	-0.167533	1.18324	2.56292	-1.00331	-0.610057	9.63886	0.956672	-1.25115	-1.14059	0.93941	-3.63807	0.543318	-0.677702	-2.49296	-4.13592	0.94315	-0.532911	0.537965	-0.421539	1.58197	-1.41461	1.15154	-4.25311	1.85553	0.533702	0.877305	-0.407048	7.25619	-1.2133	-0.800728	2.59477	1.39178
SPBC32H8.03	-0.374465	2.83819	-2.63666	-1.0613	-0.552072	0.957845	-1.43128	-0.166137	-0.166137	0.121115	0.978167	-2.1345	-0.391118	-0.332572	0.173838	-0.250112	-0.622563	1.07798	0.915889	2.71361	2.48178	0.870897	2.71723	1.37292	0.733473	-5.24855	3.53806	2.22363	-0.707292	0.959154	1.73837	3.24316	-1.72876	-1.0604	-1.20706	0.730062	-2.36785	0.392105	-1.8277	2.74963	-1.66734	-0.625402	2.51963	0.334464	0.782904	-0.77479	-2.21914	0.159528	-3.04093
SPBC36.07	-0.847833	-6.71303	1.27152	-3.40469	-3.31002	0.394998	-6.04002	0.777792	-0.363994	1.56463	1.17118	-6.96854	-1.59362	0.663951	-0.0538412	0.193416	0.653346	0.0543403	-5.12069	-17.5113	-4.39561	0.763124	-17.9935	-9.78201	-2.84917	2.22467	-12.2108	-1.61649	-0.0777186	-0.17702	-0.13107	-3.84351	-1.6664	5.66408	-8.42113	-1.1034	-20.3854	-11.7807	-7.1848	-7.53318	4.81899	2.56032	-11.2827	1.41059	-10.8388	0.516977	-1.93303	-0.640302	1.19802
SPBC365.12c	0.906597	1.47477	-0.694757	-1.40835	0.486004	2.92767	-0.505982	0.746549	0.746549	0.913477	-0.125952	-1.71114	0.815279	-0.345818	-0.322537	0.575027	0.844359	0.0361468	-0.757412	-0.186894	-3.23826	-0.249783	2.62134	0.0772079	-2.36184	1.13777	-1.46593	-0.504359	0.506667	1.61275	-0.0325759	-5.5901	1.17551	-0.544883	-1.05922	-0.435839	-2.59839	-1.64485	-3.34836	-0.0128312	-1.8937	0.515491	-2.20643	-0.99338	1.47344	0.441205	2.96947	-0.74359	-1.27075
SPBC365.20c	-0.255222	-1.55462	0.37432	0.520742	0.479537	0.387885	-1.53732	1.3471	-0.0407843	0.0880781	-0.74974	-1.06572	0.422912	-1.27335	-0.175207	0.0399373	0.194262	-0.562632	1.10209	0.861729	2.37772	-0.284539	1.2116	-0.0417438	2.0597	0.73188	-2.61492	-0.824525	-0.219063	-1.04627	-0.383631	-1.34555	0.318679	-0.376446	-0.48138	-0.332058	-2.62321	-0.199508	-2.15788	-0.461897	-1.4431	-0.718475	0.350566	-1.22621	1.76705	0.941943	1.20078	-0.811139	-0.607487
SPBC3B8.02	0.44561	-6.81011	-3.21172	-3.21947	-1.83801	1.52977	-5.57704	-2.47152	-2.23945	-0.864192	-1.23514	-7.66263	-1.08964	-2.28295	-1.19776	-0.0739474	0.344935	-1.16374	-6.85359	-24.0526	-7.41733	-0.942782	-11.7774	-10.9219	-7.81456	-0.837088	-14.532	-1.89837	1.96704	-0.533249	-0.0892092	-8.03741	-2.90438	2.13903	-11.1752	-1.29502	-23.1105	-16.1096	-11.1022	-11.0007	1.20411	-3.55344	-17.4191	-0.013453	-7.16177	3.34279	-4.26792	-3.93788	-2.35435
SPBC3B8.08	-0.32645	-0.686606	0.664006	-2.82542	1.38163	0.581324	-0.944798	0.971477	0.971477	1.28879	0.685813	1.62752	-0.539704	0.535872	-0.505355	0.382104	0.288021	0.764452	1.34472	-7.94354	1.31135	0.842912	0.600546	0.101863	-0.11272	0.663443	2.35132	-0.557302	-0.211139	-0.367222	0.513226	-3.57343	-1.33903	1.24221	-0.175269	-0.550448	-3.44284	-1.89328	-3.36032	-0.249466	1.61055	-1.64129	-1.21351	-1.45565	1.41173	0.532461	0.89065	-0.653789	-2.17601
SPBC3E7.07c	0.106386	2.77236	0.682011	0.478676	0.803737	-1.14736		1.11325	0.821241	0.873662	0.214522	0.492954	-0.457909	0.335337	0.399464	-0.141709	1.24672	-0.415996	0.665952	0.648597	-0.313681	-0.138064	0.435201	-0.26501	-1.01559	0.58611	1.13035	-0.491852	-0.753338	0.0889713	0.33969	-1.37846	1.24979	1.04816	1.00573	0.609836	3.32051	1.46622	3.38985	0.396063	0.500433	-0.730754	0.943966	-0.105824	-0.994417	-0.347382	1.3579	0.340639	-0.657073
SPBC3H7.03c	-1.1815	-6.74462	2.14226	-4.67553	-3.15151	-3.94281	-3.34632	-5.90601	-5.66527	-3.53727	-2.57882	-9.24143	-2.65467	-1.65501	-2.4603	-1.4974	-1.26371	-1.7647	-6.61651	-18.0129	-5.40105	-1.93214	-20.6675	-11.7137	-3.07069	-1.77998	-14.024	-2.64639	0.172368	-1.47691	-1.1419	-3.12787	-3.5455	4.43833	-10.9478	1.63919	-20.309	-14.21	-7.90424	-11.0608	2.96242	2.14143	-14.0816	-0.435781	-12.8808	1.49074	-6.27151	-4.09345	1.57592
SPBC3H7.10	-0.663151	-6.92356	2.15303	-3.95609	-4.06625	-1.31041	-3.19936	-5.4783	-5.4783	-2.75642	-1.56264	-8.25315	-3.07439	1.49018	-2.40442	-1.12698	0.478658	-2.35488	-6.8035	-19.0876	-7.90222	-1.79306	-18.95	-10.8596	-7.3822	-0.948432	-12.2592	-4.08153	-0.989064	-2.30016	-2.19444	-2.98043	-4.10268	2.1536	-11.9369	0.826665	-19.2466	-12.9164	-8.96708	-11.1111	2.56695	0.795802	-12.5914	-0.691195	-11.4488	0.933305	-1.48638	-5.57602	1.82508
SPBC409.07c	-0.348767	-12.5521	-0.764812	-3.40753	0.836952	-0.29069	-4.47764	-3.61727	-3.61727	-1.84808	-2.17217	-6.24893	-1.7713	0.490789	-1.31125	-1.09011	-2.03176	-2.23446	-8.42098	-19.2309	-6.72202	-2.36071	-16.3296	-12.9216	0.780744	2.53601	-14.2929	-4.25073	0.684073	-4.29141	-1.80771	-9.35937	-2.00523	4.23364	-14.0114	1.52408	-22.9185	-15.1707	-10.9254	-10.3327	-3.65964	2.04144	-12.3147	0.626018	-8.46268	-0.746494	-0.980298	-3.3021	2.6345
SPBC428.08c	0.693512	-2.36703	-1.34633	-0.832762	-0.681064	-0.313662	-0.848257	-0.0996398	-0.0033597	-0.522539	-0.346021	1.79165	-0.87245	0.696749	0.154803	0.532297	-0.718472	-0.799505	0.392848	-3.26651	0.943506	-0.955205	0.940454	0.849068	2.46608	0.900865	-0.597396	0.486512	-0.0935792	-0.451647	0.360012	-1.71914	1.5115	0.620336	-2.84515	-0.48744	-3.62204	-3.04304	-3.87882	-0.570285	-0.760322	-1.80067	1.43305	0.98179	0.904814	-0.40788	0.452163	-1.3804	-1.64103
SPBC428.15	0.158361	2.01177	-0.733125	-0.709552	0.556012	1.07958	0.448509	-0.188116	-0.00191213	0.0921198	-0.0360251	0.955675	0.17404	-0.621314	-0.552755	0.311341	-0.0291878	0.116074	0.548478	0.981538	1.17042	-0.301634	1.29823	-0.0722653	0.185328	-0.532877	-0.411844	0.756127	-0.37381	0.771722	-0.259266	1.80674	-0.282367	-0.36353	0.740765	0.482579	1.53162	1.50836	1.63664	-0.047844	-1.49247	0.985227	0.822208	-0.579023	1.05627	-0.922969	1.24157	-0.440671	-0.485297
SPBC4F6.08c	-1.98584	3.44442	3.21518	5.21947	2.4912	1.75574	9.09657	-8.92751	-7.19132	-5.84948	-3.50925	4.71056	-3.06956	-2.04629	-5.39689	-2.8959	-4.82613	0.103478	2.72673	4.52495	6.61081	2.15398	2.15637	0.435734	-2.43546	9.18564	10.4263	-2.98919	2.20943	-5.07223	-1.92007	4.59248	-3.61636	-1.38626	3.55071	2.32272	3.45458	7.26352	3.60665	-10.5014	1.76718	-2.30005	7.02765	1.58225	4.53819	-0.528874	1.28695	4.61346	5.92821
SPBC543.07	-2.04655	-7.55146	-4.47819	-5.88997	4.46403	2.7943	5.87707	-1.05819	-1.05819	-1.76524	0.3643	-11.7289	1.20549	-2.72269	0.222755	0.793283	0.605526	0.768852	1.55675	4.61775	3.55877	2.83839	0.589414	-5.13604	-11.2214	-1.10025	-7.41479	-2.59859	-0.617937	-2.09664	-1.42314	-3.18187	-3.02789	0.420191	0.46351	-1.14535	1.74638	2.36012	2.75755	-0.94348	37.1969	-2.93856	5.87236	-1.27736	-6.1155	-3.35274	-2.02659	4.62926	-1.84517
SPBC646.09c	-0.521985	-8.22438	2.25096	-6.92025	-3.13503	-0.838899	-3.73504	1.81278	1.81278	2.57504	1.66973	-13.0768	-0.521337	2.02856	0.593755	0.572615	0.356273	-0.0169755	-8.94922	-19.8067	-7.03422	-1.81283	-20.1054	-9.75438	-7.17801	-0.265171	-13.5572	-2.09365	1.17665	-2.42049	-0.684823	-14.1001	-4.67598	3.37606	-11.8668	-1.05933	-19.8606	-11.7595	-10.2675	-17.1342	-6.16243	-1.83801	-10.6724	0.56019	-15.6726	2.91367	-8.13962	-3.56365	1.94358
SPBC646.13	-0.217636	2.39641	-1.22677	-0.735155	0.384591	1.12532		0.397081	0.397081	0.180624	0.0883756	0.636593	-0.371458	-0.350311	0.122163	0.40643	0.622805	0.520824	1.06272	1.03733	-0.928193	0.0990303	-0.6707	-0.429276	0.697336	0.699471	2.49237	0.485626	0	0.512875	1.2055	1.77029	2.86521	0.500872	0.657353	-0.0594134	0.996894	0	0.429754	0.797065	-1.42131	-0.696863	-0.348708	0.0195621	0.786648	0.917556	-0.667658	0.738762	-0.38453
SPBC649.04	-0.134413	-2.68577	1.20032	-1.83022	-0.430492	0.35025	1.19314	0.556723	-0.373165	-0.351935	-0.0144407	-0.829734	-0.0723565	-0.136303	0.270848	0.00459408	-0.523836	0.219906	0.448361	1.31237	1.58385	-0.0305836	-10.8953	-4.57461	-1.02589	-0.839141	2.04395	-0.423101	0.387099	0.56305	-0.549995	-3.65512	0.899078	-0.534358	-0.118464	0.628347	-0.776308	-2.01183	-0.582597	1.16926	-2.65834	0.409429	1.49289	-1.18456	4.56502	0.674079	-0.10614	0.465218	1.00482
SPBC660.10	-1.50238	2.70716	1.49005	2.02113	1.02301	1.33404	3.47274	-3.38915	-2.8443	-2.91019	-0.974089	1.41168	-1.64049	-1.59373	-2.70229	-1.3003	-2.91665	-1.08467	1.52978	4.57197	3.3925	0.0500029	4.57433	-0.0560241	-4.4206	4.82255	6.17275	-1.1333	0.46038	-1.36458	0.347449	8.38156	-2.12278	-0.921368	1.38747	-2.60933	1.85039	1.78904	2.42994	-5.46276	3.33614	-1.28685	4.53406	-0.355501	2.04639	-0.34402	1.01273	1.64988	4.23786
SPBC685.04c	-0.364434	3.26773	-0.698965	-0.706301	-0.863508	1.06786	0.583013	0.939309	0.939309	0.0293759	0.33471	-3.22829	-0.820967	0.814029	0.301298	0.14852	-0.00786931	-0.230717	0.58464	-0.736293	-0.934954	-1.0514	19.1626	-7.05785	1.33292	-0.874388	-5.12359	0.654485	-1.03418	0.44778	0.187925	-7.26174	0.727059	0.307734	0.247838	0.10177	1.93336	1.30961	0.551539	0.066865	1.66338	-3.56549	1.63765	-0.983856	-9.77004	-0.605122	0.517066	1.27075	1.82339
SPBC691.03c	-1.18175	3.37547	-1.90795	-0.902169	-1.83058	1.34339	-0.0564274	1.15253	-0.220156	-0.556316	0.446278	-1.99813	-0.883906	-0.439293	0.374625	-0.171038	-0.711662	-0.177691	-0.81328	1.02286	1.11772	-0.341937	9.58206	-7.37408	2.36525	-2.07621	-9.02208	1.34563	-1.58107	0.337828	0.599359	-12.5836	1.24971	0.992651	1.81426	0.922402	1.4693	0.793813	0.379979	-0.299037	-0.944743	-2.43435	2.70917	-1.68695	-5.36007	1.48206	1.82164	0.793995	1.93948
SPBC725.11c	-1.98197	2.59262	1.89985	2.6638	-3.50187	0.493465	1.32812	3.31088	2.54454	0.593321	1.62386	2.73162	-1.35249	2.04896	1.09309	0.998642	-0.0197827	1.37635	-1.30978	1.48819	2.23624	0.57842	2.48854	-0.267597	2.48598	-2.87241	4.78252	-0.807663	0.363483	0.720252	0.457218	-1.75884	3.68502	-5.40286	0.885058	-1.53494	6.80291	5.1064	7.2798	-1.16507	1.92558	0.941489	5.50067	1.18192	4.15419	2.07031	0.726832	-1.60118	2.13202
SPBC776.01	-0.561903	-1.08688	0.436525	1.16086	-0.624374	-2.20414	1.48779	0.874355	0.582893	0.829715	0.00216877	8.95816	-0.655068	-0.403368	-0.0568183	0.00857896	0.324218	-0.145472	0.421165	-2.69788	1.40033	0.271565	1.52513	-1.65531	1.91452	2.03515	-3.27588	-1.68699	0.00752492	0.730825	0.606185	-6.61036	0.210683	1.01306	-0.0589823	0.230737	-0.969353	0.796762	-1.64655	-0.112859	-0.896178	-1.7932	-1.75065	0.00889823	-3.02219	-1.06561	0.563888	0.489215	1.92823
SPBC947.05c	0.83994	-0.788522	-1.25745	1.12307	0.676499	0.675812	0.438119	-0.4437	-0.0308869	-0.550086	-0.0790746	7.16436	0.207866	0.42801	0.304221	-0.223495	-0.0265636	-0.651365	-0.691044	-2.88907	0.862241	-0.991837	-4.85088	-3.42902	-1.29893	-1.0804	2.69885	-0.761982	-1.36953	0.348911	1.53512	-1.32146	0.592502	-3.26823	-0.944099	0.96596	1.31072	0.170555	1.2436	0.119478	-0.482828	-0.641626	-1.00429	-0.318662	0.385355	-0.405219	2.51905	0.0382398	0.895516
SPBC947.09	1.04212	2.8864	-1.91431	-1.46762	-0.49761	0.531816	-0.0380593	-0.352656	-0.171334	-0.526233	-0.129242	1.5078	0.423585	-0.784354	-0.676427	-0.0705409	-0.564505	0.0534857	0.806869	-0.925635	1.23958	-0.223596	8.75412	-5.55025	-1.99468	-0.504326	-0.966971	-0.705401	-0.00797504	1.31655	-0.945174	-7.40549	0.381136	-2.98845	0.173658	1.85579	1.36479	-0.57973	0.599313	0.674115	-1.24006	2.24015	-1.4512	-0.217316	-1.55441	-1.52837	-1.36111	-0.983088	-0.50967
SPBC9B6.03	1.6417	6.30738	-0.597837	4.06832	-1.02525	-0.755232		1.11245	1.11245	0.24571	0.40494	-1.61333	1.06988	-1.62548	0.000763849	0.442908	0.468902	1.16894	-2.04792	0.950472	5.85805	0.00273506	7.9317	3.35434	-3.1478	-0.936158	1.81345	1.23843	-2.78633	0.0938658	0.432583	-4.71544	1.76692	-0.309817	-0.10334	1.08385	-1.65182	1.18172	-0.530466	0.25742	3.59844	-3.38269	3.05445	0.0650297	5.98287	1.26109	2.8576	0.682012	-2.17199
SPBP22H7.04	-0.569188	0.896626	0.42892	1.91679	0.818602	-0.497032	1.59865	-1.0622	-0.906786	-0.853128	0.110604	-1.22321	-1.25461	1.29257	-0.295825	-0.579702	-1.1082	-0.0210908	-0.753203	-0.963776	4.55051	0.252187	-0.752126	-1.32333	0.699482	-0.278337	0.393045	-0.267577	0.0591399	-0.252793	0.11772	-0.884672	-1.5351	0.817095	1.63262	1.07837	0.360578	1.7415	-0.0296474	0.0146938	-0.4098	0.982732	0.936173	-0.115566	0.423904	0.412012	0.188934	-0.212525	1.6828
SPBP35G2.11c	0.27639	1.19119	-0.368044	-0.726015	-0.112606	-0.313196	-3.00656	-0.913921	-0.913921	-0.254984	-1.2036	-0.551334	0.239932	-0.599517	-0.085703	-0.435694	-0.0031445	-1.16613	0.799403	-1.07124	2.5249	-1.35341	0.872342	1.81722	-2.24599	-2.48103	-1.68553	-0.586384	-0.874486	-0.375825	-0.980509	-3.40607	1.72528	0.321348	-1.28403	-1.14194	-3.39423	-1.84016	-2.9785	-0.133183	-2.50009	-1.70677	-2.13967	0.755954	2.55948	0.831706	1.29997	-0.960212	-0.713364
SPBP8B7.27	0.403063	-0.743358	0.354285	-1.21081	0.251894	-0.817879	-0.382347	0.467711	0.467711	0.0150139	-0.715152	-2.24772	0.4983	-0.534343	-0.0315474	0.317162	-0.25981	-0.778348	2.01562	-1.16311	1.27474	-0.860283	1.38983	3.49639	0.761647	-1.35655	2.92365	-0.36958	-0.883598	0.160739	0.740491	-1.38622	0.789472	-0.618249	-1.54372	-1.14643	-4.2725	-1.08074	-3.53692	0.288665	0.657133	-1.54336	-0.975881	0.644998	2.10695	0.531248	1.33751	-1.27292	-0.548603
SPBP8B7.31	0.859541	4.22099	1.54759	1.24991	1.8925	1.35727	3.47362	1.35663	0.812149	0.818688	0.339759	2.55435	0.45498	0.887158	0.916596	0.540977	0.552199	0.73415	0.947522	2.67603	2.0287	1.23505	1.63947	4.57515	1.63048	1.42016	2.2217	1.93825	3.01218	1.13155	0.897818	-0.797156	0.599675	-1.01353	1.67647	-0.828531	2.54293	1.42949	2.60315	-0.268276	0.900431	-1.59051	0.634624	-0.28678	2.86156	0.826987	0.987994	1.26264	-1.90185
SPBPB21E7.04c	0.590876	-1.05565	-0.75607	-0.572488	0.586474	0.877692	0.57673	0.642056	0.463137	-0.416787	-0.867015	-0.895261	0.853201	-0.951978	-0.0795207	0.245674	-1.21123	-0.573776	2.3341	0.388275	1.36502	-0.339356	-1.35564	0.939772	1.14528	-2.89781	0.637853	-0.475324	-0.767995	0.815098	0.544489	-1.61387	-0.943034	-1.70572	-2.19	-0.907044	-3.59203	-1.69226	-3.12357	0.733285	-0.987371	-1.28708	-1.69	0.646603	2.10089	-1.10661	0.428777	1.21374	-0.893536
SPBPJ4664.05	-0.190366	1.08629	0.84374	-1.21985	0.485258	1.41778	-0.222795	0.154409	0	-0.446007	0.506241	0.868978	-0.422133	0.114003	-0.405337	0.00810015	0	0.547398	0.667631	0.439792	0.670536	0.690896	0.750143	-1.32877	2.73805	1.29669	1.13508	-0.575911	0	0.311682	0	1.42407	0.350117	0.476959	1.47977	0.306143	-0.0922611	0.820594	0.466859	-0.970813	-0.793279	0.72034	0.856077	0.542546	2.01588	0.39728	1.52075	-0.689868	-2.9098
SPCC1020.08	0.154568	1.01356	-0.344283	1.49226	-0.0520728	1.63665	2.06005	0.614329	0.614329	0.676544	1.49629	-1.18783	-0.0915115	0.594037	0.357349	-0.370142	-0.0622652	-0.460375	1.22119	0.784038	0.960739	-1.21313	0.676933	-3.35147	-1.27042	-1.10871	1.71982	1.60621	-0.448696	0.977686	0.104481	1.6244	0.761343	-0.182889	1.05769	1.23947	1.21316	1.37137	-0.0265938	0.694273	-1.37667	-1.86487	3.19257	-0.0348966	-3.82896	0.946896	-0.48679	0.880481	-1.98026
SPCC1235.03	-0.0688768	-1.79806	-0.709366	-0.0865343	-0.341252	0.158104	-2.50741	0.396441	-0.190305	-0.0395199	-0.0782438	-0.824316	-0.281581	0.445961	0.241329	0.0129691	-0.285974	-0.326748	-0.664527	-0.931834	-1.67437	-0.00821763	0.346402	0.604234	-0.384013	-1.34793	1.2847	-0.459109	0.956421	-0.603573	-0.151955	-2.3823	-0.598475	0.39459	-1.52313	0.740196	2.74592	0.877754	3.44348	0.0485624	-1.91845	-0.426424	1.11386	1.48647	-1.20378	-0.450173	0.69298	-1.23963	-2.68851
SPCC1259.02c	-0.564751	-9.50775	1.90925	-6.48998	-2.40287	-2.60687	-4.58729	-0.295192	-0.295192	0.185736	0.69421	-5.03336	0.31402	3.02557	-0.285579	0.747703	-0.999992	0.380179	-4.8141	-19.9658	-5.18777	-0.725808	-16.2642	-12.0976	-7.59689	-0.358443	-12.5924	-0.723157	1.12239	-0.730828	-0.719082	-5.33788	-1.1507	4.93263	-8.38024	-1.17396	-20.2202	-12.262	-11.2513	-7.58658	-2.04455	2.3903	-17.8903	0.106172	-3.15546	0.523705	-1.0135	-3.17193	3.94555
SPCC126.12	-0.603764	-4.5186	-0.968406	-0.995179	-0.688931	0.725853		0.633117	0.633117	0.764959	1.07765	1.33009	0.247461	0.387293	0.0468422	0.648955	0.255296	1.08354	1.19044	1.925	1.16215	0.507722	2.41807	0.978856	2.53812	-0.727836	-2.39014	1.11149	0.779908	0.360993	0.202904	-2.2037	1.57553	1.0778	-0.561066	0.939627	-7.12384	-2.64144	-6.32579	1.42364	-1.62101	-0.459604	0.870044	0.57401	-4.19295	-2.2893	-0.587447	0.871307	-0.559354
SPCC1393.13	-1.80284	4.65636	-1.79212	-1.1039	0.192613	-5.67232	1.35798	3.13951	3.13951	2.34033	-0.140871	-1.56912	-1.09806	-3.10621	1.57257	1.61806	1.31829	0.838798	-1.31584	11.1146	5.24328	0.914014	17.1014	5.04591	1.17786	6.50447	-11.0527	-2.66137	0.209777	-2.26305	-0.22177	1.66605	2.42217	2.27282	1.577	1.25473	2.19724	1.88507	3.21035	4.53072	-1.87903	-2.32807	4.59776	-0.197745	-2.58019	-1.06634	1.79725	5.58464	0.429072
SPCC13B11.01	0.226088	-7.02851	-2.52083	-7.17574	-1.341	1.5881	-3.48074	-4.61739	-2.60673	-0.455066	-0.840339	-7.24781	-1.2554	-0.759342	-1.46692	0.0485099	-0.43289	-0.432173	-5.10378	-19.1028	-5.21988	-0.385785	1.7974	-4.64784	3.65885	1.3637	-13.0459	-1.98809	-0.053755	-1.59962	-1.84799	-3.05036	-3.60422	3.15058	-11.9744	-1.44001	-22.1737	-13.487	-9.32133	-11.8297	-2.23725	3.01457	-13.5831	1.18173	-8.72348	0.993507	-0.851021	-2.52529	2.52749
SPCC1494.08c	-2.44853	-3.55945	2.2122	3.47492	1.73198	2.31958	0.366029	2.34275	2.22722	1.56296	-0.782197	-8.4493	-1.62067	0.203191	1.28653	1.61275	2.27007	-1.04006	-4.93485	-1.33371	-4.11799	0.156809	3.80769	2.21835	1.38322	9.52809	-8.16383	-1.02326	0.0488916	0.291526	-1.22246	-18.131	-2.83247	0.676776	2.56384	-3.38786	0.715958	0.483481	0.353548	0.713356	-2.08797	-2.54479	-2.67537	-0.867207	-2.66479	-2.38757	-3.04666	3.26767	4.86296
SPCC162.12	-0.0433828	0.627559	-1.75329	-0.999341	0.940831	0.822913	-0.112714	1.06255	0.962047	0.776243	-0.566197	1.32217	-0.186815	-1.06949	0.442294	0.205403	0.020691	-0.149586	-0.732728	1.38539	1.57507	-0.701585	4.46347	1.06011	2.54949	-1.79347	5.48516	-0.770582	0.00259255	0.0125604	0.086256	-4.1522	1.0226	-0.0826697	-0.53032	0.432706	-0.192334	0.502897	-0.0896327	0.616999	-0.931384	-0.714304	2.46445	1.2762	5.6799	-1.89908	-1.78383	0.315413	1.46144
SPCC1620.03	0.224392	0.670966	-0.942555	-1.0553	0.465713	-1.39656	-0.145478	-0.739416	-0.739416	-1.28169	-0.43385	-1.5587	0.305762	-0.864855	-0.0542938	0.00938751	-0.998763	0.0356702	1.11255	2.05736	1.03074	0.814478	3.43571	0.311027	2.11898	0.995337	3.05089	-1.3415	-0.578966	-1.33516	-0.488269	1.28342	-1.04866	-0.148916	1.05552	-0.557735	-2.08629	-1.2722	-1.01149	-1.52469	-1.26386	-0.980433	1.68302	0.132321	2.29292	0.738312	1.17098	-0.650231	1.81389
SPCC16A11.08	0.642204	3.08273	1.35851	-2.69469	1.87181	4.29969	0.286333	1.34062	1.34062	0.171339	0.262905	-1.56594	0.933514	-0.74347	-0.0215924	0.881237	0.941615	0.98128	1.82616	-3.74288	-2.43071	0.767911	0.609364	0.405452	-0.853672	-1.39592	-1.13106	-0.899039	-0.593592	0.0728978	-0.59614	-2.61167	-0.975598	-0.24847	-1.76206	1.05309	-1.42448	0.27749	-1.92452	0.931117	0.941422	-2.1656	-1.58737	2.05166	-3.23751	1.59095	1.34217	-0.257626	-1.09957
SPCC16C4.11	0.275752	-4.67811	1.61217	-4.27918	-3.45426	-2.09483		-0.456282	0.0388949	0.783164	0.936158	-8.50135	-1.40306	0.919568	-0.184149	-0.229836	0.0877811	0.416579	-7.33825	-14.8522	-5.34443	-0.521373	-1.24205	-7.08888	-2.40602	-1.87102	-12.4385	-1.33854	0	-2.23112	-1.87283	-4.41505	-1.16612	2.69402	-7.44879	-0.874829	-20.1828	-10.2994	-6.27122	-6.4134	-1.12155	3.37142	-12.8462	0.0931723	-11.8447	-1.48985	-2.39982	-2.83003	1.55942
SPCC1753.02c	-1.65092	2.17021	-2.50901	-4.75933	-5.40943	-1.06658	-0.616959	-0.962305	-0.962305	0.340144	1.5472	-5.16125	-3.19467	-1.58452	0.229594	-0.979705	-0.25758	0.755488	-2.6815	-11.8891	-4.51945	0.0632609	-14.7459	-13.6116	-11.2941	-0.315362	-10.649	-3.51033	2.51761	-2.8566	-2.51219	-14.6475	-0.465971	2.84045	-3.2767	0.984197	-6.79061	-4.63425	-2.71236	-5.91068	2.90161	1.79397	-5.20423	0.273226	-13.6936	-0.614157	-1.45798	-2.46798	-2.52979
SPCC188.02	0.50561	-9.14596	1.56651	-3.87099	-0.982839	2.29012	-1.67517	-1.9914	-1.9914	0.515705	1.6261	-14.3937	0.204163	1.19004	-0.183999	0.436601	1.1163	1.74099	-4.42607	-19.2668	-13.5864	1.13595	-19.1551	-11.3683	2.61087	3.21247	-12.5522	-1.61987	2.97407	-0.41936	0.834249	-4.86147	-0.710285	3.50395	-13.2585	4.46381	-20.1303	-13.6923	-10.0983	-9.90198	-1.4833	3.07088	-12.1513	1.81958	-10.7962	-1.60257	-3.3518	-0.761391	3.36052
SPCC18B5.03	0.133514	1.76603	-0.315637	-0.667774	0.972361	0.948207	2.36056	-0.599281	-0.253411	0.0805402	1.07071	1.78522	0.444836	-0.820963	-0.357938	-0.1796	-0.158128	0.865238	1.14395	1.74416	-0.292681	0.168742	-0.624387	0.799627	-1.69022	0.71909	-0.652913	-0.397338	-0.552255	0.835132	0.172339	0.974057	1.1506	-0.574355	1.16887	0.876391	2.19149	1.04499	1.03582	0.965038	0.386304	1.36401	0.553773	-0.0409593	1.78149	0.91022	0.991584	-0.93969	-0.469993
SPCC24B10.18	-1.08211	4.27826	1.08919	2.28316	1.57457	-1.30469	1.73117	1.06448	1.06448	0.324178	-1.53847	1.56316	-0.37359	-0.981282	0.668693	0.606353	0.237781	-0.915505	1.38231	-2.73024	2.78743	-1.55963	3.03647	0.582375	1.64744	-0.526203	-5.54167	0.760204	0.425707	1.0344	1.16494	-3.16951	1.79812	-0.0308618	2.80483	1.12121	1.99419	2.15008	2.50618	0.886807	2.90348	2.27342	1.8102	-0.156029	4.62533	-1.2135	1.64923	0.224212	0.996549
SPCC320.03	0.361437	3.61866	-0.709049	-0.951732	-0.875233	-0.279588		5.37664	5.37664	3.70988	2.25127	-7.08975	1.26899	0.419203	0.240472	0.160078	0.11575	1.18485	0.584956	-6.30098	-0.912827	1.49578	-0.608868	-0.517308	-10.23	-0.263447	0.89609	0.508784	-0.858077	-0.0790082	0.259193	-3.08953	-0.514293	-1.68436	-0.478907	1.25729	2.63129	8.48013	0.301687	0.0976784	-4.0785	-1.55733	7.0704	0.0644114	-2.87558	1.39456	0.615286	-0.827293	-0.453767
SPCC320.07c	0.704758	1.04956	-0.636328	-0.535366	1.78084	2.34445	5.06785	-0.374544	0.0826434	-0.0721758	0.574371	0.429003	0.731427	0.254196	0.547368	0.157701	-0.242672	0.844181	2.757	2.06525	3.89904	0.412995	1.86942	0.951809	-3.55522	-0.830489	1.14669	3.84826	-1.44943	2.01113	2.31519	-2.23965	1.72939	-1.09296	-1.10225	-0.771849	-3.03801	-1.23781	-3.72422	0.0165737	-1.20607	1.08177	-1.86767	-0.406679	4.62502	0.40171	1.23529	0.52277	-0.340428
SPCC338.04	-0.744308	-1.66878	1.11484	-1.36547	1.6456	2.20327	2.21136	4.37221	4.37221	3.30932	0.813075	1.26118	-0.492629	-0.798385	0.197633	1.36617	1.78916	1.19159	0.758039	-1.47188	-2.87721	-0.567699	-0.75594	0.895046	-3.34552	-2.09912	-4.46258	0.958688	0.012687	0.0488541	0.665025	-1.71102	0.933188	-1.22997	-2.41578	-0.61458	-3.49701	-0.080344	-2.3859	0.332947	-2.12177	-2.70473	-1.95863	0.938664	3.41151	0.494278	2.63657	-1.28846	0.483704
SPCC4B3.03c	0.44614	-3.83186	-1.76299	-2.75071	-0.871526	1.66797	-0.142293	-0.873811	-0.873811	-0.608677	-0.691583	-4.05919	0.490628	-0.640887	0.3095	0.037157	-0.368007	-0.215497	1.9688	-1.93473	2.6125	-0.455862	8.96181	0.761478	0.560928	-3.94671	-1.26735	0.784666	-1.25019	0.420661	0.905373	-8.17045	-1.79401	-0.252773	-1.06744	-1.09792	-3.61266	-1.74216	-3.9344	-0.0112893	-1.79338	-1.47254	3.98844	1.25348	3.77381	0.783587	3.94065	-0.399793	12.3114
SPCC4B3.12	-0.0773655	0.75304	1.19489	2.75599	1.44718	1.19779	-1.03199	0.754235	-0.0729478	0.449284	-0.317626	3.07976	0.24296	0.625235	0.15523	-0.0280854	1.81613	1.20978	2.55935	5.59804	3.00152	1.8758	1.65518	3.58689	1.69882	-1.98494	2.11253	0.900255	-0.359584	1.32551	0.319855	-0.844209	3.65421	-1.73239	-4.28789	2.16461	-12.4741	-9.61293	-10.5695	1.42466	-1.73806	1.40675	-0.720696	-0.659687	4.1108	-0.905208	3.9458	-0.534003	-2.22775
SPCC4G3.09c	0.712944	-2.31741	3.3564	4.82955	0.70237	1.25126	2.34414	0.912691	0.912691	0.774379	-0.093714	2.0297	-0.563009	1.39256	0.286996	-0.013461	0.449105	1.02738	1.43794	4.8358	3.70318	-0.184842	-3.46593	-2.89024	-2.68783	-7.06598	16.1323	0.488708	0.537667	-1.04738	-0.846498	4.28818	1.87442	-1.74549	-1.57432	-0.147804	-2.49901	-1.7186	-1.86368	-0.0769123	4.42751	-1.26455	-2.50699	0.264133	0.789277	1.0234	1.46859	-0.5156	-1.50187
SPCC4G3.12c	0.362101	1.01815	-0.990811	-3.28487	-0.252938	1.04277	-0.279494	0.909734	0.378212	0.756228	0.771631	1.23443	-1.30834	0.996297	1.21188	0.555754	0.819205	0.398374	-0.671258	1.12729	3.67497	0.405877	1.48466	-0.167606	1.22158	0.530278	1.28051	0.943997	2.35947	1.22736	1.47322	1.98021	-1.37586	0.398742	-0.683418	0.488476	-1.85744	-0.493609	-2.17082	-0.403666	1.14969	1.1755	-1.52928	1.92083	-3.80547	-1.23298	-0.996605	-0.325901	-0.736143
SPCC4G3.17	0.732767	2.89115	1.12018	2.68174	1.39528	2.32059	0.919864	1.01472	1.01472	0.22562	0.369331	1.23164	0.383655	-0.742448	-0.307782	0.385473	-0.434897	-0.604467	2.27043	4.93535	3.42768	0.00245114	2.76838	1.94466	1.78093	-0.924787	-1.29779	3.45861	-0.989651	1.27424	1.60529	2.55462	1.14291	0.649041	-0.0117982	-1.41233	-2.58202	-0.758162	-1.9618	-0.578332	-0.830965	-2.10182	3.61852	-0.46532	4.93921	0.321721	3.45731	0.422198	-0.324906
SPCC553.01c	0.414589	-6.91765	2.26493	-2.17499	-3.21606	-1.72153	-5.50897	-2.4795	-2.4795	-0.901719	1.90128	-6.45825	-0.653562	-2.60686	-1.06736	-0.652515	-1.06955	-1.16504	-6.75549	-19.8565	-8.80876	-0.808643	-20.1355	-9.50573	1.20261	-0.985354	-12.0871	-2.89005	0.809986	-1.57889	-2.0649	-3.46618	-2.37709	2.69973	-10.4716	-0.910414	-22.4376	-13.2517	-7.35079	-7.8575	5.02926	1.84241	-13.8294	-0.200417	-10.9746	0.831079	-4.63005	-3.95023	1.09808
SPCC5E4.10c	-0.19164	-2.85995	0.561596	-1.47367	-0.497645	-3.78498	0.745297	-0.0936746	0.0491742	-0.507719	0.552724	1.23452	-0.380651	0.198435	0.322557	-0.284842	0.125981	-0.77442	1.40902	-1.68918	1.13356	-1.13358	3.40923	1.46099	0.763625	-1.86422	1.02468	0.449723	-2.10616	1.04371	1.36145	-1.52079	1.16087	-0.710271	-0.916531	-1.31933	-5.81421	-3.5756	-7.70821	-0.999319	-2.72809	-2.98514	-2.12571	-0.318217	4.04712	-0.479814	0.535987	0.596897	0.674234
SPCC613.03	0.428107	2.38091	-0.762323	2.09418	-0.5469	1.91835		-0.658635	0.574486	-0.199341	0.0144922	-13.0466	-0.25493	1.53818	0.210516	0.102844	0.663887	1.45899	2.81725	-0.84529	3.27141	1.94102	-0.464459	-11.8199	-25.8946	-3.67459	-6.51918	1.06212	-0.314499	-1.20706	0.753465	-0.764942	2.55083	1.75294	1.52887	-1.74055	-0.547757	0.489353	-0.548635	-1.26716	2.04518	0.718172	-1.52354	1.98882	2.21252	-1.34976	-0.82164	1.32021	-0.990477
SPCC622.11	0.304729	0.681776	-0.665734	-1.18282	-0.211464	1.60759	0.131309	1.12079	1.12079	0.0956904	0.150457	-1.0829	-0.0724106	0.461626	-0.0113266	0.357688	0.897009	0.490242	0.122816	-0.797501	2.26142	0.318986	0.542667	1.18853	0.653126	-1.18234	-3.40107	-0.565216	-0.536258	0.643657	0.403774	-1.83014	-0.804668	-0.408348	0.98213	-0.660512	-3.22841	-0.883057	-3.37384	-0.390376	-0.317747	-1.44393	0.606908	-0.329162	2.05308	0.74348	1.0341	-1.18484	-2.01612
SPCC63.03	-0.248932	0.820834	-0.545803	-1.46591	2.13714	1.50336	2.54584	-2.73374	-1.54365	-0.331813	-0.23749	-0.711336	-0.368567	1.02699	-0.184671	-0.033699	0.385515	0.0275471	0.500832	0.57549	-0.887685	0.445728	3.44626	1.74311	-0.321743	1.47133	1.7556	3.93304	0.708037	-0.0426163	1.48808	1.78607	1.80834	0.386678	-1.99794	-0.258055	-3.94747	1.21365	-3.55013	-1.12103	-1.08876	0.991735	2.23918	0.925009	1.59899	-0.886745	0.540081	0.878523	0.828789
SPCC63.06	-4.38392	4.77462	1.13964	5.89188	2.1654	3.25864		3.912	3.86047	2.77858	2.56444	3.85381	-1.10335	1.21302	2.1892	2.36162	2.30643	1.78392	0.793234	4.04482	4.5298	2.40871	8.86982	3.47564	5.32022	2.42976	1.05458	-4.36357	1.81635	1.89695	1.85883	-6.81227	1.76789	2.82486	4.0202	-1.75951	3.29967	4.20272	3.85498	3.02563	2.19243	0.825167	8.53675	3.13772	4.2551	-2.66299	-0.55533	3.28292	7.09407
SPCC663.06c	-0.288027	2.53054	0.91937	-1.71066	0.520416	-0.820954	1.10647	0.30711	0.30711	0.177492	0.257166	-1.20567	-0.338117	0.347571	-0.114867	-0.149414	-0.282654	0.254514	0.765008	0.516807	0.787899	0.48169	0.85335	0.548021	0.932943	-0.850093	-0.3925	1.09224	-0.539162	0.0670634	1.07415	-1.00658	0.596816	-0.254156	0.042244	-0.234984	-0.165348	-0.616791	-0.304512	-0.271532	-1.19075	0.409922	-1.55989	-0.375048	0.558073	-0.466615	1.83864	0.244885	0.792506
SPCC736.13	-0.430611	-1.84075	-0.807528	-1.10128	-1.57791	-2.24439	0.370481	0.838876	0.838876	0.655645	0.184233	-3.18114	-0.264105	0.604959	0.333825	-0.0726853	-0.145867	-0.0933029	-1.00314	-0.886342	-0.325153	-0.0512765	-1.30432	-0.0218177	0.385784	-1.43973	-0.706669	0.410741	0.155919	-0.277376	-0.742085	-1.55907	-0.672189	-0.0702724	-0.0197297	-0.884158	-0.723647	-0.0371961	-0.582952	0.169277	-0.631513	-1.17754	2.17512	-1.03439	1.45185	0.652841	1.39876	-1.0586	-1.22257
SPCC794.03	0.657528	1.03665	-0.773595	6.21362	1.81009	1.79286		-0.505904	-0.300007	-0.274765	0.0264725	2.45626	0.56917	0.788597	0.160076	0.678486	0.504204	-1.2031	3.52165	7.24441	1.81073	0.0619046	4.49491	2.18917	1.04988	-0.927677	1.79219	2.85909	-0.736405	1.2802	2.08885	2.42309	2.49783	0.150564	0.145136	-1.10588	-3.2964	-1.87555	-2.55763	-0.133827	-1.96319	-2.35721	0.47219	-0.599701	5.72034	-1.43286	2.69624	0.353937	-0.528072
SPCC962.05	0.824815	1.3417	0.83967	-1.49237	-0.726821	1.24147	-0.472361	0.944087	0.929525	0.614479	0.118396	-0.567059	0.828555	-0.475835	0.392346	0.387455	0.430903	-0.149071	1.57893	1.00428	-0.837581	-0.111755	1.42094	3.37888	0.448315	-0.979231	2.51495	0.903259	-0.917571	0.0838145	0.520326	2.05477	1.02956	-0.197836	0.705845	0.458516	1.01791	0.930105	1.77107	-0.332763	-1.09277	-0.526839	1.61107	0.199992	1.32247	1.8366	1.72426	-0.692953	0.868591
SPCC965.12	0.0690995	-0.684115	1.67917	1.33363	2.12182	1.1473		0.986778	0.986778	0.957936	1.20968	2.17534	1.09895	-1.16589	0.527812	0.328706	1.28794	0.404272	3.07294	5.43843	3.16458	1.00797	3.2088	3.1365	3.68698	-3.6345	1.45651	1.61957	0.223809	0.665701	1.07047	1.32114	3.70261	1.83908	-0.688909	1.92035	-5.22589	-1.55804	-3.81888	0.397421	-2.05199	1.59284	1.33687	0.285988	5.38723	-0.815022	6.14919	-0.685008	-0.528377
SPCP31B10.02	0.254365	1.61438	-1.60256	0.846763	0.545054	-1.26742		-0.524322	-0.524322	-0.324484	0.491283	1.28224	0.0561301	-0.710911	0.341172	0.0753099	0.220988	0.555414	2.86931	2.65812	1.76996	0.651865	-0.924782	1.16217	1.47786	0.930218	3.89375	-3.25401	-1.39719	-3.58236	-1.90174	-2.00857	1.30157	-0.588009	0.78084	-0.305104	2.49145	0.876078	2.07966	-0.886246	-0.382317	-0.809582	-4.77405	-0.231262	0.660208	-1.33468	0.715362	-1.00995	-1.18913
[truncated: 59 more columns]

## Sheet: trigitised_data
	YES_size	Bleomycin_size	Cycloheximide_size	Ethylenediaminetetraacetic acid_size	Trichostatin A_size	Tunicamycin_size	Cadmium chloride_size	0.1% glucose in media + grown for 7d_size	0.5% glucose in media + grown for 7d _size	1% glucose in media + grown for 7d _size	Grown for 7 days_size	Valproic Acid_size	EMM_size	Canavanin A_size	0.1% glucose in media + grown at 25Ã‚Â°C_size	0.5% glucose in media + grown at 25Ã‚Â°C_size	1% glucose in media + grown at 25Ã‚Â°C_size	3% glucose in media + grown at 25Ã‚Â°C_size	Ethanol_size	Formamide_size	Sodium orthovanadate_size	Grown at 25Ã‚Â°C_size	Sodium dodecyl sulfate_size	0.5M potassium chloride + 0.004% sodium dodecyl sulfate_size	Potassium chloride_size	Lithium chloride_size	Diamide_size	Hydrogen peroxide_size	Phloxine B (twice the usual concentration)_size	Phloxine B (twice the usual concentration) + 10mM hydrogen peroxide_size	Phloxine B (twice the usual concentration) + 15mM hydrogen peroxide _size	Tert-Butyl hydroperoxide_size	Benzamidine_size	Sodium Chloride_size	150mM sodium chloride + 0.005% methyl methanesulfonate_size	Glycerol as carbon source with 0.1% starter glucose_size	Methyl methanesulfonate_size	3% Glycerol as carbon source + 0.005% methyl methanesulfonate_size	2% Glycerol as carbon source with 0.1% starter glucose + 0.0075% methyl methanesulfonate_size	Xylose as carbon source with 0.1% starter glucose_size	Egtazic acid_size	Tea tree oil_size	Hydroxyurea_size	8mM hydroxyurea + 0.075% methyl methanesulfonate _size	Bortezomib_size	Dihydrocoumarin_size	UV light (Stratalinker)_size	3-Amino-1,2,4-triazole_size	Cobalt(II) chloride_size
1	0	-1	1	0	0	0	1	0	0	0	0	1	-1	0	0	0	0	0	-1	-1	0	0	0	0	-1	1	-1	0	0	-1	0	-1	0	0	0	0	0	0	0	0	1	-1	-1	0	-1	0	0	1	1
103	0	1	0	0	0	0	0	0	0	0	0	0	0	0	0	0	0	0	0	0	1	0	0	0	0	0	0	0	0	0	0	0	0	0	0	0	0	0	0	0	0	0	0	0	0	0	0	0	0
1039	0	0	0	0	0	0	0	0	0	0	0	0	0	0	0	0	0	0	0	0	0	0	0	0	0	0	0	0	0	0	0	0	0	0	0	0	0	0	0	0	0	0	0	0	0	0	0	0	0
1064	0	0	0	0	0	0	0	0	0	0	0	0	0	0	0	0	0	0	0	0	0	0	0	0	0	0	0	0	0	0	0	0	0	0	0	0	0	0	0	0	0	0	0	0	0	0	0	0	0
1088	0	0	0	0	0	0	0	0	0	0	0	0	0	0	0	0	0	0	0	0	0	0	0	0	0	0	0	0	0	0	0	0	0	0	0	0	0	0	0	0	0	0	0	0	0	0	0	0	0
1097	0				0	0	0			0	0	0	0	0			0	0	0	0	0	0						0
1119	-1				0	1	1			-1	0	1	-1	0			-1	0	0	0	0	0						-1
1122	0	0	0	0	0	0	0	0	0	0	0	0	0	0	0	0	0	0	0	0	0	0	0	0	1	0	0	0	0	0	0	0	0	0	0	0	0	0	0	0	0	0	0	0	0	0	0	0	0
1125	0	0	0	0	0	0	0	0	0	0	0	0	0	0	0	0	0	0	0	0	0	0	0	0	0	0	0	0	0	0	0	0	0	0	0	0	0	0	0	0	0	0	0	0	0	0	0	0	0
1130	0	0	0	0	0	0	0	0	0	0	0	0	0	0	0	0	0	0	0	0	0	0	0	0	0	0	0	0	0	0	0	0	0	0	0	0	0	0	0	0	0	0	0	0	0	0	0	0	0
115	0	0	0	0	0	0	0	0	0	0	0	0	0	0	0	0	0	0	0	0	0	0	0	0	0	0	0	0	0	0	0	0	0	0	0	0	0	0	0	0	1	0	0	0	0	0	0	0	0
1154	0	0	0	0	0	0	0	0	0	0	0	0	0	0	0	0	0	0	0	0	0	0	0	0	0	0	0	0	0	0	0	0	0	0	0	0	0	0	0	0	0	0	0	0	0	0	0	0	0
1164	0	0	0	0	0	0	0	0	0	0	0	1	0	0	0	0	0	0	0	0	0	0	0	0	0	0	0	0	0	0	0	0	0	0	0	0	0	0	0	0	0	0	0	0	0	0	0	0	0
1165	0	0	0	0	0	0	0	0	0	0	0	0	0	0	0	0	0	0	0	0	0	0	0	0	0	0	0	0	0	0	0	0	0	0	0	0	0	0	0	0	0	0	0	0	0	0	0	0	0
1166	0	0	0	0	0	0	0	0	0	0	0	0	0	0	0	0	0	0	0	0	0	0	0	0	0	0	0	0	0	0	0	0	0	0	0	0	0	0	0	0	0	0	0	0	0	0	0	0	0
12	0	0	0	0	0	0	0	0	0	0	0	0	0	0	0	0	0	0	0	0	0	0	0	0	0	0	1	0	0	0	0	-1	0	0	0	0	0	0	0	0	0	0	0	0	0	0	0	0	0
1234	0	1	0	0	0	0	-1	0	0	0	0	0	-1	1	0	0	0	0	0	0	0	0	0	0	1	0	1	0	0	0	0	1	0	0	0	0	0	0	0	0	0	0	-1	0	0	0	0	1	0
1249	0	0	0	0	0	0	0	0	0	0	0	0	0	0	0	0	0	0	0	0	0	0	0	0	0	0	0	0	0	0	0	0	0	0	0	0	0	0	0	0	0	0	0	0	0	0	0	0	0
1255	0	0	0	0	0	0	0	0	0	0	0	0	0	0	0	0	0	0	0	0	0	0	0	0	0	1	0	0	0	0	0	1	0	0	0	0	0	0	0	0	1	0	-1	0	0	0	0	0	0
130	0	0	0	0	0	0	0	0	0	0	0	0	0	0	0	0	0	0	0	0	0	0	0	0	0	0	0	0	0	0	0	0	0	0	0	0	0	0	0	0	0	0	0	0	0	0	0	0	0
1326	0	0	0	0	0	0	0	0	0	0	0	0	0	0	0	0	0	0	0	0	0	0	0	0	0	0	0	0	0	0	0	0	0	0	0	0	0	0	0	0	0	0	0	0	0	0	0	0	0
1343	-1	1	1	1	1	1	1	1	1	1	0	1	0	1	1	1	1	0	0	1	1	0	1	1	1	1	-1	1	1	1	0	-1	1	0	1	0	1	1	1	1	-1	1	-1	1	-1	-1	0	0	1
1348	0	0	0	0	0	0	0	0	0	0	0	0	0	0	0	0	0	0	0	0	0	0	0	0	-1	0	0	0	0	0	0	0	0	0	0	0	-1	-1	0	0	0	0	0	0	1	0	0	0	0
1361	0	0	0	0	0	0	0	0	0	0	0	0	0	0	0	0	0	0	0	0	0	0	0	0	0	0	0	0	0	0	0	0	0	0	0	0	0	0	0	0	0	0	0	0	0	0	0	0	0
137	0	0	0	0	0	0	-1	0	0	0	0	0	0	0	0	0	0	0	0	0	0	0	0	0	0	0	0	0	0	0	0	0	0	0	0	0	0	0	0	0	0	0	0	0	0	0	0	0	0
1372	0	0	0	0	0	1	0	0	0	0	0	0	0	0	0	0	0	0	0	0	0	0	0	0	0	0	0	0	0	0	0	0	0	0	0	0	0	0	0	0	0	0	0	0	0	0	0	0	0
1415	0	0	0	0	0	0	0	0	0	0	0	0	0	0	0	0	0	0	0	0	0	0	0	0	0	0	0	0	0	0	0	1	0	0	0	0	0	0	0	0	0	0	0	0	0	0	0	0	0
144	0	0	0	0	0	0	0	0	0	0	0	0	0	0	0	0	0	0	0	0	0	0	0	0	1	0	0	0	0	0	0	0	0	0	0	0	1	0	1	0	0	0	0	0	0	0	0	0	0
1443	0	0	0	0	0	0	0	0	0	0	0	0	0	0	0	0	0	0	0	0	0	0	0	0	0	0	0	0	0	0	0	0	0	0	0	0	0	0	0	0	0	0	0	0	0	0	0	0	0
145	0	0	0	0	0	0	1	0	0	0	0	0	0	0	0	0	0	0	0	0	0	0	0	0	0	0	0	0	0	0	0	0	0	0	0	0	1	0	0	0	0	0	0	0	0	0	0	0	0
1460	0	0	0	0	0	0	0	0	0	0	0	0	0	0	0	0	0	0	0	0	0	0	0	0	0	0	0	0	0	0	0	0	0	0	0	0	0	0	0	0	0	0	0	0	0	0	0	0	0
1519	0	0	0	0	0	-1	0	0	0	0	0	0	0	0	0	0	0	0	0	0	0	0	0	0	0	0	0	0	0	0	0	0	0	0	0	0	0	0	0	0	-1	0	0	0	1	0	0	0	0
1530	0	0	0	0	0	0	0	0	0	0	0	0	0	0	0	0	0	0	0	0	0	0	1	0	0	0	0	0	0	0	0	0	0	0	0	0	0	0	0	0	0	0	0	0	0	0	0	0	0
1559	0	0	0	0	0	0	0	0	0	0	0	0	0	0	0	0	0	0	0	0	0	0	0	0	0	0	0	0	0	0	0	-1	0	0	0	0	0	0	0	0	0	0	0	0	0	0	0	0	0
1562	0	0	0	0	0	0	0	0	0	0	0	0	0	0	0	0	0	0	0	0	0	0	0	0	0	0	0	0	0	0	0	0	0	0	0	0	0	0	0	0	0	0	0	0	0	0	0	0	0
1624	0	0	0	0	0	0	0	0	0	0	0	0	0	0	0	0	0	0	0	0	0	0	0	0	0	0	0	0	0	0	0	0	0	0	0	0	0	0	0	0	0	0	0	0	0	0	0	0	0
1670	0	0	0	0	0	0	0	0	0	0	0	0	0	-1	0	0	0	0	0	0	0	0	0	0	0	0	0	0	0	0	0	0	0	0	0	0	0	0	1	0	1	0	0	0	0	0	0	0	0
168	0	0	0	0	0	0	0	0	0	0	0	0	0	0	0	0	0	0	0	1	0	0	0	0	0	0	1	0	0	0	0	0	0	0	0	0	0	0	0	0	0	0	0	0	0	0	0	0	0
1696	0	0	0	0	0	0	0	0	0	0	0	0	0	0	0	0	0	0	0	0	0	0	0	0	0	0	0	0	0	0	0	0	0	0	0	0	0	0	0	0	0	0	0	0	0	0	0	0	0
175	0	0	0	1	0	0	0	0	0	0	0	1	0	0	0	0	0	0	0	0	0	0	-1	0	0	-1	0	0	0	0	0	0	0	0	0	0	0	0	0	0	0	0	0	0	0	0	0	-1	0
177	0	0	0	0	0	1	0	0	0	0	0	0	0	0	0	0	0	0	0	0	0	0	0	0	0	0	0	0	0	0	1	0	0	0	0	0	0	0	0	0	0	0	0	0	0	0	0	0	0
187	0	0	0	0	0	0	0	0	0	0	0	0	0	0	0	0	0	0	0	0	0	0	0	0	0	0	0	0	0	0	0	0	0	0	0	0	0	0	0	0	0	0	0	0	0	0	0	0	0
188	0	0	0	0	0	0		0	0	0	0	0	0	0	0	0	0	0	0	0	0	0	0	0	1	0	0	0	0	0	0	0	0	0	0	0	0	0	0	0	0	0	0	0	0	0	0	0	0
189	0	-1	0	0	0	-1	0	1	1	1	0	1	0	0	0	0	0	0	0	1	-1	0	1	0	1	1	1	1	0	1	0	1	-1	1	1	0	1	1	0	1	-1	0	-1	0	1	0	0	0	1
190	0	0	0	0	0	0	0	0	0	0	0	0	0	0	0	0	0	0	0	0	0	0	0	0	0	0	0	0	0	0	0	0	0	0	0	0	0	0	0	0	0	0	0	0	0	0	0	0	0
194	0	0	0	0	0	0	0	0	0	0	0	0	0	0	0	0	0	0	0	0	0	0	0	0	0	0	0	0	0	0	0	1	0	0	0	0	0	0	0	0	0	0	0	0	0	0	0	0	0
230	0				0	0	0			0	0	0	0	0			0	0	0	0	0	0						0
236	-1	1	0	0	0	0	0	1	1	1	0	1	-1	1	1	0	0	0	1	1	1	0	1	1	1	1	1	0	0	0	0	1	1	0	1	1	0	1	0	1	-1	0	1	1	-1	-1	0	1	1
239	0	0	0	0	0	0	-1	0	0	0	0	0	0	0	0	0	0	0	0	0	0	0	0	0	0	0	0	0	0	0	0	0	0	0	0	0	0	0	0	0	1	0	0	0	0	0	0	0	0
242	0	0	0	0	0	0	0	0	0	0	0	0	0	0	0	0	0	0	0	0	0	0	0	0	1	0	0	0	0	0	0	0	0	0	0	0	0	0	0	0	0	0	0	0	0	0	0	0	0
248	0	0	0	0	0	0	0	0	0	0	0	0	0	0	0	0	0	0	0	0	0	0	0	0	0	0	0	0	0	0	0	0	0	1	0	0	0	0	0	0	0	0	0	0	0	0	0	0	0
253	0				0	0	0			0	0	0	0	0			0	0	0	0	0	0						0
254	0	0	0	0	0	0	0	0	0	0	0	0	0	0	0	0	0	0	0	0	0	0	0	0	0	0	0	0	0	0	0	0	0	0	0	0	0	0	0	0	0	0	0	0	0	0	0	0	0
256	0	0	0	0	0	0	0	0	0	0	0	0	0	0	0	0	0	0	0	0	0	0	0	0	0	0	0	0	0	0	0	0	0	0	0	0	0	0	0	0	0	0	0	0	0	0	0	0	0
26	0	0	0	0	0	0	0	0	0	0	0	0	0	0	0	0	0	0	0	0	0	0	0	0	0	0	0	0	0	0	0	0	0	0	0	0	0	0	0	0	0	0	0	0	0	0	0	0	0
264	0				0	0	0			0	0	1	0	0			0	0	0	0	0	0						0
282	0	-1	0	0	0	0	0	0	0	0	0	0	0	0	0	0	0	0	0	0	0	0	0	0	-1	0	0	0	0	0	0	0	0	0	-1	0	-1	-1	-1	0	0	0	0	0	0	0	0	0	0
284	0	0	0	0	0	-1	0	0	0	0	0	0	0	0	0	0	0	0	0	0	0	0	0	0	0	1	0	0	0	0	0	0	0	0	0	0	0	0	-1	0	0	0	0	0	0	0	0	0	0
289	0	0	0	0	0	0	0	0	0	0	0	0	0	0	0	0	0	0	0	0	-1	0	0	0	0	0	0	0	0	0	0	0	0	0	0	0	0	0	0	0	0	0	0	0	0	0	0	0	0
29	0				0	0	0			0	0	-1	1	0			0	0	0	0	0	0						0
30	0	0	0	0	0	0	1	0	0	0	0	0	0	0	0	0	0	0	0	0	0	0	0	0	0	0	0	0	0	0	0	0	0	0	0	0	0	0	0	0	0	0	0	0	0	0	0	0	0
31	0	-1	0	0	0	0	0	0	0	0	0	0	0	0	0	0	0	0	0	0	1	0	0	0	-1	0	0	0	0	0	0	0	0	0	-1	0	-1	-1	-1	0	0	0	0	0	1	0	0	0	0
311	0				0	0	0			0	0	0	0	0			0	0	0	0	0	0						0
318	0				1	0				0	1	-1	-1	0			0	0	0	0		0						0
3205	0				0	1	0			0	0	-1	0	0			0	0	0	0	0	0						0
323	0	0	0	0	0	0	0	0	0	0	0	0	0	0	0	0	0	0	0	1	0	0	0	0	0	0	0	0	0	0	0	1	0	0	0	0	0	0	0	0	0	0	0	0	0	0	0	0	0
335	0	0	0	0	0	0	0	0	0	0	0	0	0	0	0	0	0	0	0	0	0	0	0	0	0	0	0	0	0	0	0	0	0	0	0	0	0	0	0	0	0	0	0	0	0	0	0	0	0
3461	0				0	-1	0			0	0	-1	-1	0			-1	0	0	0	-1	0						0
37	0	0	0	0	0	0	0	0	0	0	0	0	0	0	0	0	0	0	0	0	0	0	0	0	0	0	0	1	0	0	0	0	0	0	0	0	0	0	0	0	0	0	0	0	0	0	0	0	0
377	0	0	0	0	1	0	0	0	0	0	0	0	0	0	0	0	0	0	0	0	0	0	0	0	0	1	0	0	0	0	1	0	0	0	0	0	0	0	0	0	0	1	0	0	0	0	0	1	0
382	0	0	0	0	0	0	0	0	0	0	0	0	0	0	0	0	0	0	0	0	0	0	0	0	0	0	0	0	0	0	0	0	0	0	0	0	0	0	0	0	0	0	0	0	0	0	0	0	0
383	0	0	0	0	0	0	0	0	0	0	0	0	0	0	0	0	0	0	0	0	0	0	0	0	0	0	0	0	0	0	0	0	0	0	0	0	1	0	1	0	0	0	0	0	0	0	0	0	0
388	0	0	0	0	0	0	0	0	0	0	0	0	0	0	0	0	0	0	0	0	0	0	0	0	0	0	0	0	0	0	0	0	0	0	0	0	0	0	0	0	0	0	0	0	0	0	0	0	0
389	0	0	0	0	0	0	0	0	0	0	0	0	0	0	0	0	0	0	0	0	0	0	0	0	0	0	0	0	0	0	0	1	0	0	0	0	0	0	0	0	0	0	-1	0	0	0	1	0	0
394	0	0	0	0	0	0	0	0	0	0	0	0	0	0	0	0	0	0	0	0	0	0	0	0	0	0	0	0	0	0	0	0	0	0	0	0	0	0	0	0	0	0	0	0	0	0	0	0	0
399	0	1	0	0	0	0	0	0	0	0	0	0	0	0	0	0	0	0	0	0	0	0	0	0	0	0	0	0	0	0	0	-1	0	0	0	0	0	0	0	0	0	0	0	0	0	0	0	1	0
400	0	0	0	0	0	0	0	0	0	0	0	0	0	0	0	0	0	0	0	0	0	0	0	0	0	0	0	0	0	0	0	0	0	0	0	0	0	0	0	0	0	0	0	0	0	0	0	0	0
401	0	0	0	0	0	0	0	0	0	0	0	-1	0	0	0	0	0	0	0	0	0	0	0	0	0	0	0	0	0	0	0	0	0	0	0	0	-1	0	0	0	0	0	0	0	0	0	0	0	0
402	0	0	0	0	0	0	0	0	0	0	0	0	0	0	0	0	0	0	0	0	0	0	0	0	0	0	0	0	0	0	0	0	0	0	0	0	1	0	1	0	0	0	0	0	0	0	0	0	0
405	0				0	0	0			0	0	1	0	0			0	0	0	0	0	0						0
410	0	1	0	0	0	0	0	0	0	0	0	0	0	0	0	0	0	0	0	0	0	0	0	0	0	0	0	0	0	0	0	0	0	0	0	0	0	0	0	0	0	0	0	0	0	0	0	0	0
412	0	0	0	0	0	0	0	0	0	0	0	0	0	0	0	0	0	0	0	0	0	0	0	0	0	0	0	0	0	0	0	0	-1	0	0	0	0	0	0	0	0	0	0	0	0	0	0	0	0
414	0	0	0	0	0	0	0	0	0	0	0	0	0	0	0	0	0	0	0	0	0	0	0	0	0	0	0	0	0	0	0	0	0	0	0	0	0	0	0	0	1	0	0	0	0	0	0	0	0
421	0	0	0	0	0	0	-1	0	0	0	0	-1	0	0	0	0	0	0	0	0	1	0	0	0	0	-1	0	0	1	0	0	0	0	0	0	0	0	0	0	1	1	0	0	0	0	0	1	0	0
426	0	0	0	0	0	0	0	0	0	0	0	0	0	0	0	0	0	0	0	0	0	0	0	0	0	0	0	0	0	0	0	0	0	0	0	0	0	0	0	0	0	0	0	0	0	0	0	0	0
4302	0				-1	0	-1			0	0	0	0	0			-1	0	0	0	0	0						0
4320	0				0	-1	0			0	0	-1	0	-1			0	0	0	0	0	0						0
4472	0				0	0	-1			0	0	0	0	0			0	0	0	0	0	0						0
452	0	0	0	0	0	0	0	0	0	0	0	0	0	0	0	0	0	0	0	0	0	0	0	0	0	0	0	0	0	0	0	0	0	0	0	0	0	0	0	0	0	0	0	0	0	0	0	0	0
46	0	0	0	0	0	0	0	0	0	0	0	0	0	0	0	0	0	0	0	0	0	0	0	0	0	0	0	0	0	0	0	0	0	0	0	0	0	0	0	0	0	0	0	0	0	0	0	0	0
463	0	0	0	0	0	-1	-1	0	0	0	0	0	0	0	0	0	0	0	0	0	0	0	0	0	0	0	0	0	0	0	0	0	0	0	0	0	0	0	0	0	0	0	0	0	0	0	0	0	0
475	0	0	0	0	0	0	0	0	0	0	0	0	0	0	0	0	0	0	0	0	0	0	0	0	0	0	0	0	0	0	0	0	0	0	0	0	0	0	0	0	0	0	0	0	0	0	0	0	0
5036	0				0	1	1			0	0	1	0	0			0	0	0	0	0	-1						0
5040	0				-1	-1	0			0	0	0	0	0			0	0	0	0	0	0						0
5041	0				0	0	0			0	0	0	0	-1			0	0	0	0	0	0						0
507	0	-1	0	0	0	0	0	0	0	0	0	0	0	0	0	0	0	0	0	0	0	0	0	0	0	0	0	0	0	0	0	0	0	0	0	0	0	0	0	0	0	0	0	0	0	0	0	0	0
51	0	0	0	0	0	0	0	0	0	0	0	0	0	0	0	0	0	0	0	0	0	0	0	0	0	1	0	0	0	0	0	0	0	0	0	0	0	0	0	0	0	0	-1	0	-1	0	0	0	0
515	0	0	0	0	0	0	0	0	0	0	0	0	0	0	0	0	0	0	0	0	0	0	0	0	0	0	0	0	0	0	0	0	0	0	0	0	0	0	0	0	0	0	0	0	0	0	0	0	0
524	0	-1	-1	0	-1	0	0	0	0	0	0	0	0	0	0	0	0	0	0	0	0	0	0	0	0	0	-1	0	0	0	0	0	0	0	0	0	-1	-1	-1	0	0	0	0	0	0	0	0	0	0
5296	0				-1	0	-1			0	0	-1	-1	0			0	0	0	-1	0	-1						0
534	0	0	0	0	0	0	1	0	0	0	0	0	0	0	0	0	0	0	0	0	0	0	0	0	0	0	0	0	0	0	0	0	0	0	0	0	0	0	0	0	0	0	0	0	1	0	0	0	0
538	0	0	0	0	0	0	0	0	0	0	0	0	0	0	0	0	0	0	0	0	0	0	0	0	0	0	0	0	0	0	0	0	0	0	0	0	0	0	0	0	0	0	0	0	0	0	0	0	0
539	0	0	0	0	0	0	0	0	0	0	0	0	0	0	0	0	0	0	0	0	0	0	0	0	0	0	0	0	0	0	0	0	0	0	0	0	0	0	0	0	0	0	0	0	0	0	0	0	0
549	0				0	0	-1			0	0	0	0	0			0	0	0	0	0	0						0
59	0	0	0	0	0	0	0	0	0	0	0	0	0	0	0	0	0	0	0	0	0	0	0	0	0	0	0	0	0	0	0	0	0	0	0	0	1	1	0	0	0	0	0	0	0	0	0	0	0
5916	0				-1	0	0			0	0	0	0	-1			-1	-1	0	0	0	-1						0
601	0	0	0	0	0	0	0	0	0	0	0	0	0	0	0	0	0	0	0	0	0	0	0	0	0	0	0	0	0	0	0	0	0	0	0	0	0	0	0	0	1	0	0	0	0	0	0	0	0
603	0				0	0	0			0	0	0	0	0			0	0	0	0	0	0						0
628	0	0	0	0	0	0	0	0	0	0	0	0	0	0	0	0	0	0	0	0	0	0	0	0	0	0	0	0	0	0	0	1	0	0	0	0	0	0	0	0	0	0	0	0	0	0	0	0	1
6379	0				0	1	0			0	0	-1	0	0			0	0	0	0	0	0						0
650	0	0	0	0	0	0	0	0	0	0	0	0	0	0	0	0	0	0	0	0	0	0	0	0	0	0	0	0	0	0	0	0	0	0	0	0	0	0	0	0	0	0	0	0	1	1	0	0	0
6596	0				0	0	-1			0	0	-1	0	0			0	0	0	0	0	0						0
7	0				0	0	0			0	0	0	0	0			0	0	0	0	0	0						1
720	0	0	0	0	1	1	0	0	0	0	0	0	0	0	0	0	0	0	0	0	1	0	0	1	0	0	0	0	0	0	0	0	0	0	0	0	0	0	0	0	0	0	0	0	0	0	0	0	0
737	0	0	0	0	0	0	0	0	0	0	0	0	0	0	0	0	0	0	0	0	0	0	0	0	0	0	0	0	0	0	0	0	0	0	0	0	0	0	0	0	0	0	0	0	0	0	0	0	0
738	0	0	0	0	0	0	0	0	0	0	0	0	0	0	0	0	0	0	0	0	0	0	0	0	0	0	1	0	0	0	0	0	0	0	0	0	0	0	0	0	0	0	0	0	0	0	-1	0	0
745	0	0	0	0	0	0	0	0	0	0	0	0	0	0	0	0	0	0	0	0	0	0	0	0	0	0	0	0	0	0	0	0	0	0	0	0	0	0	0	0	0	0	-1	0	0	0	0	0	0
7506	0				0	1	1			0	0	-1	0	0			0	1	0	0	0	1						1
7507	0				0	0	0			0	0	-1	0	0			0	0	0	0	0	0						0
767	0	0	0	0	0	0	0	0	0	0	0	0	0	0	0	0	0	0	0	0	0	0	0	0	0	0	0	0	0	0	0	0	0	0	0	0	0	0	0	0	0	0	0	0	0	0	0	0	0
7767	0				0	-1	0			0	0	0	0	0			0	0	0	0	0	0						0
778	0	0	0	0	0	0	0	0	0	0	0	0	0	0	0	0	0	0	0	0	0	0	0	1	0	0	0	0	0	0	0	0	0	0	0	0	0	0	0	0	0	0	0	0	0	0	0	0	0
780	0	0	0	0	0	0	0	0	0	0	0	0	0	0	0	0	0	0	0	0	0	0	0	0	0	0	0	0	0	0	0	0	0	0	0	0	-1	0	-1	0	0	0	0	0	0	0	0	0	0
781	0	0	0	0	0	0	0	0	0	0	0	0	0	0	0	0	0	0	0	0	0	0	0	0	0	0	0	0	0	1	1	0	0	0	0	0	0	0	0	0	0	0	0	0	0	0	0	0	0
784	0	0	0	0	1	0	0	0	0	0	0	0	0	-1	0	0	0	0	0	0	0	0	1	0	0	0	-1	1	0	1	0	1	0	0	0	0	0	0	1	0	0	-1	0	0	0	0	0	0	0
79	0	0	0	0	0	0	0	0	0	0	0	0	0	0	0	0	0	0	0	0	0	0	0	0	0	0	0	0	0	0	0	0	0	0	0	0	0	0	0	0	1	0	0	0	0	0	0	0	0
808	0	0	0	0	0	0	0	0	0	0	0	1	0	0	0	0	0	0	1	0	0	0	-1	0	0	0	0	0	0	0	0	0	0	0	0	0	0	0	0	0	0	0	0	0	0	0	0	0	0
819	0	0	0	0	0	0	0	0	0	0	0	0	0	0	0	0	0	0	0	0	0	0	0	0	0	0	0	0	-1	0	0	0	0	0	0	0	0	0	0	0	0	0	0	0	0	0	0	0	0
86	0	0	0	0	0	0	0	0	0	0	0	0	0	0	0	0	0	0	0	0	0	0	0	0	0	0	0	0	0	0	0	0	0	0	0	0	0	0	0	0	0	0	0	0	0	0	0	0	0
87	0	1	0	0	0	0	0	0	0	0	0	-1	0	0	0	0	0	0	0	-1	0	0	-1	0	0	0	-1	0	0	0	0	-1	0	0	0	0	0	0	0	0	0	0	-1	0	0	0	0	0	0
90	0	0	0	0	0	0	0	0	0	0	0	0	0	0	0	0	0	0	0	0	0	0	0	0	0	0	0	0	0	0	0	0	0	0	0	0	0	0	0	0	0	0	0	0	0	0	0	0	0
900	0	-1	0	0	0	0	0	0	0	0	0	0	0	0	0	0	0	0	0	0	0	0	0	0	-1	0	0	0	0	0	0	0	0	0	0	0	-1	0	0	0	0	0	0	0	0	0	0	0	0
917	0	0	0	0	0	-1	0	0	0	0	0	-1	0	0	0	0	0	0	0	0	0	0	0	0	0	0	0	0	0	0	0	0	0	0	0	0	0	0	0	0	0	0	0	0	0	0	0	1	0
93	0	0	0	0	0	0	0	0	0	0	0	0	0	0	0	0	0	0	0	0	0	0	1	0	0	0	0	0	0	0	0	1	0	0	0	0	1	0	0	0	0	0	0	0	0	0	0	0	0
934	0	0	0	1	0	0	0	0	0	0	0	0	0	0	0	0	0	0	0	0	0	0	0	0	0	0	0	0	0	1	0	0	0	0	0	0	0	0	0	0	0	0	-1	0	0	0	0	0	0
942	0	0	0	0	0	0	0	0	0	0	0	0	0	0	0	0	0	0	0	0	-1	0	0	0	0	0	0	1	0	0	1	1	-1	0	0	0	1	1	1	0	0	0	0	0	0	0	0	0	0
965	0	-1	0	0	0	0	0			0	0	-1	0	-1			0	0	0	1	0	0	-1	0	-1	0	0	0	0	0	0	1	0	0	-1	0	-1	-1	-1	-1	0	0	0	0	0	0	1	-1	0
974	0	0	0	0	0	0	0	0	0	0	0	0	0	0	0	0	0	0	0	0	0	0	1	0	0	0	0	0	0	0	0	1	0	0	0	0	0	0	0	0	0	0	0	0	0	0	0	0	0
989	-1	-1	1	-1	-1	0	0	1	1	1	0	-1	-1	1	0	1	1	1	-1	-1	-1	1	1	-1	1	-1	-1	1	-1	1	0	1	-1	1	1	1	1	1	1	0	-1	1	1	0	1	-1	-1	0	1
993	0				0	-1	0			0	0	-1	-1	0			0	0	0	0	0	0						0
996	0	1	0	0	0	0	0	0	0	0	0	0	0	0	0	0	0	0	0	0	0	0	0	0	0	0	0	0	0	0	0	0	0	0	0	0	0	0	0	0	1	1	0	0	1	0	0	0	0
972	0	0	0	0	0	0	0	0	0	0	0	0	0	0	0	0	0	0	1	0	0	0	0	0	0	0	0	0	0	0	0	-1	0	0	0	0	-1	-1	-1	0	0	0	0	0	1	0	0	0	0
SPAC105.02c	0	1	1	1	1	1	1	0	0	0	0	-1	0	1	0	0	0	0	1	1	1	0	1	-1	-1	-1	-1	0	0	0	0	-1	0	-1	0	0	-1	0	0	0	-1	-1	0	0	1	0	0	0	0
SPAC1071.07c	-1	-1	1	1	-1	1	0	-1	-1	0	-1	-1	-1	0	0	0	0	-1	-1	-1	-1	-1	-1	-1	1	0	-1	0	0	0	0	-1	-1	1	-1	0	-1	-1	-1	-1	1	1	-1	0	-1	1	-1	0	1
SPAC1071.09c	0	0	0	1	0	-1	0	0	0	0	0	0	0	0	0	0	0	0	1	-1	1	0	0	0	0	0	-1	0	0	0	0	-1	0	0	-1	1	-1	-1	-1	0	1	1	-1	-1	-1	1	0	0	0
SPAC10F6.14c	0	1	0	0	-1	-1	0	0	0	0	0	0	0	0	0	0	0	0	-1	1	-1	0	0	0	0	0	1	0	0	0	0	0	0	0	0	0	0	0	0	-1	-1	-1	1	0	1	0	-1	1	0
SPAC11E3.12	0	0	1	1	0	0	0	0	0	0	0	1	0	0	0	0	0	0	0	0	1	0	0	0	0	0	0	-1	0	-1	-1	0	0	0	0	0	1	0	1	1	1	1	-1	0	1	-1	-1	0	0
SPAC12G12.11c	0	-1	0	0	0	-1	0	0	0	0	0	-1	0	0	0	0	0	0	0	0	0	0	1	0	0	0	-1	0	0	0	0	-1	0	0	0	0	-1	-1	-1	0	-1	0	0	0	0	0	0	0	0
SPAC13A11.06	0	0	0	1	0	0		0	0	0	0	0	0	0	0	0	0	0	0	0	0	0	0	1	0	0	1	1	0	0	0	1	0	0	0	0	0	0	0	0	0	0	0	0	0	0	0	0	0
SPAC13F5.03c	0	-1	-1	1	0	1	0	-1	-1	0	0	-1	0	0	0	0	0	0	0	-1	-1	0	1	0	0	-1	-1	0	0	0	-1	-1	0	0	0	0	0	0	0	0	0	1	0	0	1	0	-1	0	0
SPAC13F5.04c	0	0	0	-1	0	0	-1	0	0	0	0	0	0	0	0	0	0	0	0	1	0	0	-1	-1	-1	0	0	-1	0	0	-1	-1	0	1	0	0	-1	-1	-1	0	0	0	-1	-1	-1	0	0	0	-1
SPAC140.01	0	1	0	1	1	-1	0	-1	-1	-1	0	1	0	-1	-1	0	0	1	1	1	1	1	1	0	1	1	1	-1	0	-1	-1	1	-1	-1	-1	1	-1	-1	-1	-1	1	0	1	1	1	0	1	1	1
SPAC1556.02c	0	1	1	0	0	-1	0	-1	-1	-1	0	1	-1	-1	-1	0	0	0	1	1	1	0	0	0	1	1	1	-1	0	-1	0	1	-1	-1	0	1	1	0	1	-1	1	1	1	0	1	0	-1	0	1
SPAC15A10.10	0	0	0	0	0	0	-1	0	0	0	0	-1	0	0	0	0	0	0	0	0	0	0	0	-1	0	0	0	0	0	0	0	0	0	0	1	1	1	0	1	0	0	1	0	0	1	-1	0	0	0
SPAC16.01	0	-1	0	1	0	0	0	0	0	0	0	1	0	-1	0	0	0	1	-1	-1	1	1	0	-1	-1	-1	1	-1	0	-1	0	0	0	0	0	-1	1	0	1	0	1	0	-1	0	-1	-1	0	1	-1
SPAC1610.02c	0	-1	1	-1	-1	0	-1	0	0	0	0	-1	0	1	0	0	0	0	-1	-1	-1	0	-1	-1	-1	0	-1	-1	1	-1	-1	-1	-1	1	-1	0	-1	-1	-1	-1	1	1	-1	0	-1	1	-1	-1	1
SPAC1687.14c	0	-1	0	0	0	0	0	0	0	0	0	0	0	0	0	0	-1	0	0	0	0	0	1	0	0	-1	0	0	0	0	0	-1	0	0	-1	0	-1	-1	-1	0	0	0	-1	0	0	0	0	0	-1
SPAC1687.15	0	1	0	-1	0	-1	1	0	0	0	0	-1	0	0	0	0	0	0	0	-1	-1	0	-1	-1	-1	1	-1	0	0	0	0	1	0	1	1	0	0	1	0	0	0	0	-1	-1	0	0	-1	1	0
SPAC16E8.01	-1	-1	0	1	1	0	0	1	1	0	1	-1	-1	0	0	0	0	1	0	-1	0	0	-1	-1	-1	-1	-1	-1	1	-1	-1	-1	1	0	0	1	0	1	-1	1	-1	0	0	0	-1	-1	-1	1	0
SPAC1705.02	1	1	0	1	0	0	0	0	0	0	0	1	0	1	0	0	0	0	0	-1	1	0	0	1	0	0	1	0	0	0	0	1	1	-1	0	0	0	0	0	0	1	0	0	0	1	0	1	-1	0
SPAC17A2.02c	-1	1	-1	1	0	0	-1	0	0	-1	0	1	-1	0	0	0	0	0	0	1	1	0	1	-1	1	1	1	-1	1	0	0	-1	-1	1	1	0	1	1	1	-1	1	0	1	0	1	1	0	0	-1
SPAC17A5.16	0	1	0	-1	0	0	1	1	1	1	-1	-1	0	1	1	1	0	0	-1	-1	-1	-1	1	1	-1	-1	-1	-1	0	0	0	1	0	0	0	-1	0	1	1	0	-1	-1	0	1	1	0	0	0	1
SPAC17H9.04c	0	1	0	0	0	-1	0	1	1	1	0	-1	-1	1	1	0	0	0	0	-1	1	0	1	0	1	-1	1	-1	0	-1	-1	-1	1	0	-1	0	-1	-1	-1	1	1	-1	-1	0	-1	0	1	-1	-1
SPAC17H9.06c	0	0	0	0	0	0	0	0	0	0	0	0	0	0	0	0	0	0	0	0	0	0	1	0	0	0	0	0	0	0	0	0	1	0	1	0	1	0	0	0	0	1	1	0	1	0	0	0	0
SPAC1805.07c	-1	-1	0	1	1	1	0	1	1	1	0	-1	-1	1	1	0	0	0	-1	-1	-1	0	1	-1	-1	-1	-1	1	1	0	0	-1	1	1	-1	1	-1	-1	-1	1	1	1	1	0	-1	1	0	-1	1
SPAC1834.04	0	0	0	-1	1	1	0	0	0	0	0	1	0	0	0	0	0	0	0	-1	1	0	1	0	-1	1	1	0	0	0	0	-1	1	-1	-1	0	-1	0	-1	1	1	-1	-1	0	-1	0	0	0	1
SPAC1834.09	0	0	0	0	0	-1	0	0	0	0	0	0	0	0	0	0	0	0	0	0	-1	0	0	0	0	0	0	0	1	0	0	-1	0	0	-1	-1	-1	-1	-1	-1	0	0	0	-1	0	0	0	0	0
SPAC186.06	0	1	0	1	0	0	0	0	0	0	0	0	0	0	0	0	0	0	0	0	0	0	0	0	0	0	0	0	0	0	0	0	0	0	0	0	0	0	0	0	0	0	0	0	0	0	0	0	0
SPAC18B11.04	0	0	0	1	0	0	1	0	0	0	0	1	0	0	0	0	0	0	0	-1	-1	0	-1	-1	-1	0	1	1	0	1	1	1	0	0	0	0	0	0	0	0	1	0	1	1	0	0	0	0	0
SPAC19B12.07c	0	1	-1	0	0	0	0	0	0	0	0	0	0	0	0	0	0	0	1	1	1	0	1	1	1	0	1	0	0	0	0	-1	1	0	0	0	1	1	1	0	0	0	1	0	1	0	1	0	0
SPAC19G12.15c	-1	1	-1	-1	-1	-1	1	1	1	1	1	1	-1	1	0	1	1	1	-1	-1	-1	1	-1	-1	-1	1	-1	-1	1	-1	0	1	1	1	-1	1	1	0	1	-1	1	1	1	1	-1	-1	-1	1	1
SPAC1A6.04c	0	1	1	-1	1	0	1	-1	-1	-1	0	1	-1	0	-1	0	0	1	-1	-1	-1	1	-1		-1	1	-1	-1	0	-1	-1	-1	0	0	0	0	-1	-1	0	-1	1	1	-1	0	-1	-1	1	1	1
SPAC1B9.02c	0	1	-1	-1	0	-1	1	-1	0	0	0	0	0	0	0	0	0	0	-1	-1	-1	0	0	0	-1	0	-1	-1	-1	-1	-1	-1	0	0	0	0	-1	-1	-1	-1	-1	0	0	0	-1	0	0	0	0
SPAC1D4.03c	0	-1	-1	-1	0	1	0	0	0	0	0	-1	0	0	0	0	0	0	1	-1	-1	0	-1	-1	-1	-1	1	-1	0	-1	-1	1	0	0	-1	0	-1	-1	-1	1	1	-1	1	-1	1	1	-1	0	-1
SPAC1F3.09	0	0	0	0	1	0	0	0	0	0	0	0	0	0	0	0	0	0	0	0	-1	0	0	-1	-1	1	0	0	0	0	0	-1	0	-1	0	0	1	1	0	0	-1	0	1	0	0	0	1	0	1
SPAC1F8.06	0	-1	1	-1	0	-1	-1	-1	-1	-1	-1	-1	0	-1	0	0	0	0	1	-1	1	0	-1	-1	0	1	0	-1	-1	-1	0	1	0	1	0	1	-1	-1	-1	1	1	0	1	-1	-1	0	-1	-1	-1
SPAC20G4.05c	0	1	0	0	0	1	0	0	0	0	0	-1	0	0	0	0	0	0	0	0	0	0	1	1	0	-1	0	1	0	0	1	-1	0	0	-1	0	-1	0	-1	0	0	-1	-1	1	1	0	0	0	0
SPAC20H4.03c	0	-1	-1	1	-1	0	1	-1	0	0	0	1	0	0	0	0	0	0	-1	-1	1	0	-1	0	1	1	-1	-1	0	-1	-1	1	0	-1	-1	0	-1	0	-1	1	1	0	-1	-1	-1	0	-1	1	-1
SPAC21E11.04	0	0	-1	-1	0	0	-1	0	0	0	0	0	0	0	0	0	0	0	1	0	0	0	0	0	0	0	-1	0	0	0	0	-1	0	0	0	0	-1	0	0	0	-1	0	0	0	1	0	1	0	0
SPAC227.17c	0	-1	1	-1	0	1	-1	-1	-1	-1	0	-1	-1	0	-1	0	0	-1	-1	-1	-1	-1	-1	-1	-1	0	-1	0	1	0	-1	-1	-1	1	-1	1	-1	-1	-1	-1	1	0	-1	0	-1	-1	-1	-1	1
SPAC22A12.06c	0	1	1	1	0	0	1	0	0	0	0	0	0	0	0	0	0	0	0	0	0	0	0	0	0	-1	-1	1	0	0	1	0	0	0	0	0	0	0	0	1	0	0	-1	-1	1	0	1	-1	-1
SPAC22A12.14c	0	1	0	1	0	1	0	0	0	0	0	0	0	0	0	0	0	0	0	-1	0	0	0	-1	0	-1	0	0	0	1	0	0	0	0	0	0	-1	0	0	0	0	0	-1	0	0	0	-1	0	-1
SPAC22E12.14c	-1	1	0	-1	1	-1	0	1	1	0	0	1	-1	0	0	0	0	0	-1	1	1	0	1	0	1	0	-1	1	0	0	1	-1	0	-1	0	-1	1	1	1	0	-1	-1	1	1	1	0	1	1	1
SPAC22F3.04	0	0	0	0	0	1	0	0	0	0	0	0	0	0	0	0	1	0	1	1	1	0	0	1	1	0	-1	0	0	0	0	-1	1	1	-1	0	-1	-1	-1	0	-1	0	-1	0	1	0	1	0	0
SPAC23A1.06c	0	0	0	1	0	1	1	0	0	0	0	1	0	0	0	0	0	0	0	1	1	0	0	0	0	0	-1	0	0	0	0	1	0	0	0	0	-1	0	-1	0	1	0	-1	0	-1	0	0	0	-1
SPAC23C11.08	0	1	0	0	0	-1	0	-1	-1	0	0	0	-1	0	0	0	0	0	0	-1	-1	0	-1	1	-1	0	1	0	0	1	1	-1	0	0	0	0	0	0	0	0	-1	0	0	0	0	0	0	1	-1
SPAC23C4.09c	0	-1	0	1	0	0	0	0	0	0	0	1	0	0	0	0	0	0	1	1	1	0	0	1	0	0	1	0	0	0	0	-1	1	0	0	0	-1	1	-1	0	1	1	1	0	1	0	1	0	-1
SPAC23D3.03c	0	0	1	1	0	0	-1	0	0	0	0	1	0	0	0	0	0	0	0	0	0	0	0	1	0	-1	1	0	0	0	0	-1	0	0	0	0	0	0	0	0	1	0	0	0	-1	0	0	-1	1
SPAC23D3.04c	0	-1	1	-1	0	1	-1	-1	-1	0	0	-1	-1	-1	0	0	0	0	-1	-1	-1	0	-1	-1	-1	1	-1	0	1	-1	0	-1	-1	1	-1	-1	-1	-1	-1	-1	0	1	-1	0	-1	0	-1	-1	1
SPAC23G3.05c	0	1	0	0	1	0	-1	0	0	0	0	-1	0	1	0	0	0	0	1	1	-1	0	1	0	1	1	0	0	0	0	1	0	0	0	1	0	1	0	0	-1	0	-1	1	0	0	0	0	0	-1
SPAC23H4.09	0	1	0	1	0	0	0	0	0	0	0	0	0	0	0	0	0	0	-1	1	0	0	-1	1	0	0	1	0	0	1	0	-1	0	0	0	0	0	1	1	0	0	0	1	0	1	0	0	0	0
SPAC24H6.04	0	0	0	0	0	0	0	0	0	0	0	-1	0	0	0	0	0	0	0	0	0	0	1	1	0	-1	-1	0	0	0	0	-1	0	0	0	0	-1	0	-1	0	0	0	0	0	1	0	1	0	1
SPAC25A8.03c	0	1	-1	1	0	0	0	0	0	0	0	0	0	0	0	0	0	0	0	0	0	0	1	0	0	-1	0	0	0	0	1	-1	0	0	0	0	-1	0	-1	0	0	0	0	0	1	0	1	0	-1
SPAC25B8.08	0	1	0	0	0	1	0	0	0	0	0	-1	0	0	0	0	0	0	1	-1	0	0	0	0	0	-1	-1	0	0	0	0	-1	-1	-1	-1	0	0	0	0	0	-1	0	0	0	0	-1	1	0	0
SPAC26F1.10c	-1	1	0	-1	1	1	1	1	1	1	0	-1	-1	-1	1	1	1	0	1	1	-1	0	-1	-1	-1	1	1	0	1	-1	0	1	-1	0	1	0	0	-1	1	-1	0	0	1	-1	-1	1	-1	1	-1
SPAC26F1.12c	0	1	0	1	0	1		0	0	0	0	0	0	0	0	0	0	0	0	0	0	0	0	0	0	0	1	0	0	0	0	0	0	0	1	0	0	1	0	0	0	-1	0	0	0	0	0	0	0
SPAC27E2.03c	0	-1	1	-1	-1	0	-1	0	0	0	0	-1	0	-1	0	0	0	0	-1	-1	-1	0	0	-1	1	1	-1	-1	0	0	0	-1	-1	1	-1	0	-1	-1	-1	-1	1	1	-1	0	-1	0	-1	1	1
SPAC29A4.20	0	-1	1	0	-1	0	-1	-1	-1	0	0	-1	-1	0	0	0	0	-1	-1	-1	-1	-1	-1	-1	-1	1	-1	-1	0	0	-1	1	-1	1	-1	-1	-1	-1	-1	-1	1	1	-1	0	-1	0	1	-1	1
SPAC2F3.18c	0	1	0	0	0	-1	0	0	0	0	0	0	0	0	0	0	0	0	0	0	0	0	1	1	1	-1	1	0	0	0	0	1	1	0	0	0	0	0	0	0	-1	0	1	0	1	0	1	0	1
SPAC32A11.03c	0	1	0	1	-1	0	0	0	0	-1	0	0	0	0	0	0	0	0	-1	-1	-1	0	1	-1	-1	1	1	0	0	0	0	1	-1	0	0	-1	0	0	-1	0	-1	0	-1	-1	1	1	0	0	-1
SPAC3A11.02	0	0	0	-1	0	0	0	0	0	0	0	-1	-1	0	0	0	0	0	0	0	0	0	1	-1	-1	0	1	0	0	0	0	-1	0	0	-1	0	-1	0	-1	0	-1	0	-1	0	-1	0	0	0	0
SPAC3A11.10c	0	1	0	1	1	-1	0	0	0	0	0	1	0	0	0	0	0	0	0	1	-1	0	1	1	1	0	1	0	0	0	0	1	1	0	1	0	1	1	1	0	0	-1	0	0	1	0	1	0	0
SPAC3A11.11c	0	1	0	0	0	0	0	0	0	0	0	1	0	0	0	0	0	0	0	0	-1	0	1	0	0	0	1	0	0	1	0	1	0	0	0	0	0	0	0	0	0	0	0	0	0	0	0	0	0
SPAC3A12.03c	0	1	0	0	0	0		0	0	0	0	0	0	0	0	0	0	0	0	0	0	0	0	0	0	0	0	0	0	0	0	0	0	0	0	0	0	0	-1	0	0	0	0	0	0	0	0	0	-1
SPAC3A12.13c	0	-1	0	-1	-1	-1	-1	-1	-1	0	0	-1	-1	0	0	0	0	0	-1	-1	-1	0	-1	-1	-1	1	-1	-1	1	-1	-1	-1	-1	1	-1	0	-1	-1	-1	-1	-1	1	-1	0	-1	0	-1	0	1
SPAC3G6.03c	0	0	0	0	0	0	0	0	0	0	0	1	0	0	0	0	0	0	0	0	0	0	0	0	0	-1	1	0	0	0	0	1	0	0	0	0	0	0	0	0	1	0	1	0	0	0	0	0	0
SPAC3G6.05	0	1	1	1	0	0	0	0	0	0	0	-1	0	0	0	0	0	0	0	1	1	0	1	0	0	1	1	0	0	0	0	1	0	1	1	0	1	0	1	0	1	0	1	0	1	0	0	0	0
SPAC3G9.11c	0	-1	1	0	0	-1	-1	0	0	0	0	0	0	0	0	0	0	0	0	-1	0	0	0	0	0	1	1	-1	0	0	0	1	0	0	1	-1	1	-1	0	0	1	1	-1	0	1	0	0	0	-1
SPAC3H1.03	0	-1	0	0	1	0	0	0	0	0	0	0	0	0	0	0	0	0	0	0	1	0	0	0	1	-1	-1	0	0	0	0	1	1	0	0	0	0	0	0	0	0	0	1	0	-1	0	0	0	0
SPAC3H1.08c	0	0	0	-1	0	0	0	0	0	0	0	-1	-1	-1	0	0	0	0	0	-1	-1	0	-1	0	0	-1	0	0	0	0	0	-1	0	0	0	0	-1	-1	-1	0	-1	-1	0	0	-1	0	0	1	-1
SPAC3H1.11	0	-1	0	0	0	-1	0	0	0	0	0	1	0	0	0	0	0	0	0	1	1	0	0	0	1	1	1	0	0	0	0	-1	0	0	0	0	0	0	0	0	0	0	1	0	0	0	-1	0	0
SPAC3H5.08c	-1	-1	0	1	1	1	1	1	1	1	0	-1	-1	0	1	0	1	0	-1	1	-1	1	1	0	0	1	-1	-1	1	0	0	-1	-1	1	1	0	0	0	0	1	0	-1	-1	0	-1	-1	0	0	1
SPAC3H5.09c	0	0	-1	0	0	0	1	0	0	0	0	0	0	0	0	0	0	0	1	0	1	0	0	0	-1	0	0	0	-1	0	0	1	0	0	0	0	-1	-1	-1	0	0	-1	0	0	1	0	0	-1	0
SPAC3H5.10	-1	-1	1	1	1	-1	0	1	1	0	0	-1	-1	-1	0	0	0	0	-1	-1	-1	0	-1	-1	-1	1	-1	-1	1	0	0	-1	1	1	-1	0	-1	-1	-1	-1	1	1	-1	1	-1	-1	-1	0	1
SPAC3H8.03	0	1	0	0	0	0	1	-1	-1	-1	0	0	-1	0	-1	0	0	0	1	-1	0	1	-1	0	-1	0	0	0	0	0	0	0	0	-1	0	0	0	0	0	-1	0	0	1	0	0	0	0	0	0
SPAC3H8.04	0	0	0	0	0	1	1	0	0	0	0	0	0	0	0	0	0	0	0	0	0	0	0	0	0	0	0	0	0	0	0	-1	-1	0	0	0	0	0	0	0	0	0	0	0	0	0	0	0	0
SPAC4G9.11c	0	0	0	1	0	0	0	0	0	0	0	0	0	0	0	0	0	0	0	0	0	0	0	0	-1	0	0	0	0	0	0	0	0	0	0	0	0	0	0	0	0	1	0	0	0	0	0	0	0
SPAC4G9.14	0	-1	0	-1	-1	0	0	0	0	0	0	1	0	0	0	0	0	0	0	0	-1	0	0	-1	0	-1	1	-1	0	0	0	1	0	0	0	0	0	0	0	0	-1	0	0	0	-1	-1	0	0	-1
SPAC4H3.04c	1	-1	0	-1	0	0	0	0	0	0	0	0	1	0	0	0	0	0	0	-1	1	0	-1	1	0	-1	1	0	0	1	0	1	1	-1	-1	0	0	0	0	0	0	0	-1	0	0	0	-1	0	0
SPAC4H3.06	0	0	0	0	0	1	0	0	0	0	0	-1	0	0	0	0	0	0	0	-1	0	0	0	0	0	0	0	0	0	0	0	-1	0	0	0	0	-1	-1	-1	0	-1	-1	-1	0	0	1	0	0	-1
SPAC4H3.07c	-1	-1	1	-1	0	1	-1	-1	-1	0	-1	1	-1	0	0	0	-1	-1	-1	1	1	-1	1	-1	0	1	1	-1	1	-1	-1	1	1	-1	1	-1	1	1	1	1	0	-1	1	1	-1	1	-1	0	1
SPAC521.03	0	0	0	0	0	1	0	0	0	0	0	0	0	0	0	0	0	0	0	0	-1	0	0	0	-1	0	-1	0	0	0	0	1	0	0	0	0	0	0	0	0	-1	0	0	0	0	0	0	0	-1
SPAC56F8.02	0	-1	1	-1	1	1	0	1	1	0	1	0	0	0	0	0	1	1	0	-1	1	1	-1	-1	-1	1	-1	0	1	0	0	-1	-1	1	0	-1	1	-1	1	-1	1	-1	-1	0	-1	0	0	0	0
SPAC57A7.09	0	1	0	0	0	0	0	0	0	0	0	1	0	0	0	0	0	0	0	0	0	0	0	0	0	0	1	1	0	0	0	0	0	0	0	0	-1	0	0	0	0	0	0	0	0	0	0	0	0
SPAC589.07c	0	-1	-1	-1	0	1	0	-1	-1	0	0	0	0	0	0	0	0	0	1	-1	1	0	0	0	0	1	0	0	0	0	0	1	0	0	0	0	0	0	0	-1	0	0	1	0	1	0	1	0	-1
SPAC5H10.06c	0	-1	-1	-1	1	0	0	0	0	0	0	0	0	0	0	0	0	0	0	0	1	0	1	1	-1	0	0	0	-1	0	0	-1	0	0	0	-1	-1	0	-1	0	1	0	0	0	1	0	1	0	0
SPAC637.07	0	-1	0	-1	-1	0	-1	0	0	1	0	-1	0	1	0	0	0	0	-1	-1	-1	0	-1	-1	-1	0	-1	-1	0	-1	-1	-1	-1	1	-1	0	-1	-1	-1	-1	-1	1	-1	0	-1	1	-1	-1	1
SPAC652.01	0	1	1	0	-1	-1	0	0	0	0	0	0	0	0	0	0	0	0	0	0	1	0	0	0	0	-1	1	0	-1	0	0	-1	-1	0	1	0	0	0	0	0	-1	0	0	0	1	0	1	0	-1
SPAC683.02c	0	1	0	0	0	0	1	0	0	0	-1	-1	0	0	0	0	0	-1	1	1	1	-1	1	1	1	0	-1	0	0	1	1	-1	0	0	1	0	-1	0	-1	0	0	-1	-1	0	1	0	1	0	0
SPAC688.03c	0	0	0	-1	0	0	0	0	0	0	0	0	0	0	0	0	0	0	0	0	0	0	0	0	0	-1	1	1	0	0	1	1	0	-1	-1	0	-1	-1	-1	0	-1	0	-1	0	1	0	0	0	0
SPAC688.13	0	0	1	-1	0	0	0	0	0	0	0	0	0	0	0	0	0	0	0	0	1	0	0	0	0	1	-1	0	0	0	0	-1	0	0	0	0	-1	0	-1	0	-1	0	1	0	-1	0	1	0	0
SPAC694.02	0	1	0	1	0	1	1	1	1	0	0	1	0	-1	0	0	0	0	-1	-1	1	0	0	1	1	1	-1	-1	0	1	0	-1	1	0	1	-1	1	0	1	0	1	0	-1	0	1	-1	1	1	0
SPAC694.04c	0	0	0	-1	0	0	1	0	0	0	0	0	0	0	0	0	0	0	0	-1	1	0	-1	0	-1	-1	1	1	0	1	1	1	0	-1	-1	0	1	0	1	0	1	0	1	0	0	0	-1	0	0
SPAC694.06c	-1	-1	1	1	0	-1	1	0	0	0	0	0	0	0	0	0	0	0	0	0	1	0	1	1	1	-1	1	0	0	1	1	1	1	0	-1	0	-1	-1	-1	0	-1	-1	-1	-1	1	-1	-1	0	0
SPAC6F12.02	-1	-1	1	1	1	1	1	-1	0	0	-1	1	0	-1	0	0	0	0	0	1	-1	0	1	0	1	-1	1	1	1	1	1	1	-1	0	1	-1	1	1	1	0	-1	-1	-1	0	0	-1	1	1	1
SPAC6F6.13c	0	-1	0	1	-1	0	0	1	0	0	0	0	0	0	0	0	0	0	0	0	1	0	-1	0	-1	1	-1	0	0	0	0	0	1	0	0	0	1	1	0	1	0	0	0	0	0	0	0	0	0
SPAC6G10.10c	0	1	0	1	0	0	0	0	0	0	0	0	0	0	0	0	0	0	0	0	-1	0	0	0	0	0	0	0	0	0	0	1	0	1	0	0	-1	0	0	0	0	0	0	0	1	0	1	0	0
SPAC7D4.05	0	0	0	1	0	0	0	0	0	0	0	0	0	0	0	0	0	0	0	0	0	0	0	1	0	0	1	0	0	0	0	1	0	0	0	0	-1	0	0	0	1	1	0	0	0	0	0	0	0
SPAC806.04c	0	1	0	0	0	-1	0	0	0	0	0	1	0	0	0	0	0	0	0	0	1	0	0	0	0	0	-1	0	-1	0	0	1	0	0	0	0	0	0	1	0	0	0	0	0	0	0	0	0	0
SPAC806.07	0	1	0	0	0	0	0	0	0	0	0	0	0	0	0	0	0	0	1	1	1	0	0	0	0	1	0	0	0	0	0	1	0	0	0	0	0	0	0	-1	1	0	-1	0	1	0	0	1	0
SPAC821.05	0	-1	1	-1	-1	0	-1	1	1	1	0	-1	-1	-1	0	0	0	0	-1	-1	-1	0	-1	-1	-1	1	-1	-1	1	-1	-1	-1	-1	1	-1	0	-1	-1	-1	-1	1	-1	-1	1	-1	0	-1	0	1
SPAC821.07c	1	-1	1	1	1	1	1	0	0	0	0	1	1	0	0	0	0	0	1	-1	1	0	-1	0	-1	1	0	0	-1	0	0	0	0	0	-1	0	-1	-1	-1	0	1	-1	-1	-1	1	0	1	-1	-1
SPAC823.09c	0	-1	0	0	-1	-1	0	0	0	0	0	0	0	0	0	0	0	0	0	-1	0	0	0	1	1	-1	0	0	0	0	0	-1	0	0	0	0	1	0	1	0	-1	0	0	-1	-1	0	0	0	0
SPAC823.16c	0	0	0	-1	0	1	0	0	0	0	0	0	0	0	0	0	0	0	1	1	1	0	0	0	1	1	0	0	0	0	0	1	-1	0	0	0	1	0	1	0	1	0	1	1	1	0	0	0	1
SPAC890.03	0	1	0	1	0	1		1	1	1	0	0	0	0	0	0	1	0	-1	0	0	0	-1	0	1	0	0	0	0	0	1	-1	1	0	0	1	0	0	0	0	1	0	-1	0	0	0	0	0	-1
SPAC8C9.06c	-1	-1	-1	-1	-1	-1	0	-1	-1	-1	-1	-1	-1	1	-1	-1	-1	1	-1	-1	-1	0	1	0	1	1	1	-1	1	-1	0	-1	-1	-1	-1	1	-1	-1	-1	-1	-1	1	-1	-1	-1	-1	-1	-1	-1
SPAC8C9.16c	0	0	0	-1	0	0	0	0	0	0	0	0	0	0	0	0	0	0	0	0	0	0	0	0	0	0	-1	0	0	0	0	0	0	1	0	0	1	0	0	0	0	0	0	0	0	0	1	0	0
SPAC8F11.03	0	0	0	0	0	0	0	0	0	0	0	0	0	0	0	0	0	0	0	0	0	0	0	0	0	0	0	0	0	0	0	0	0	0	-1	0	-1	0	0	0	0	0	0	0	0	0	0	0	0
SPAC977.15	0	0	0	0	0	0	1	0	0	0	0	0	0	0	0	0	0	0	0	0	0	0	0	0	0	0	0	0	0	0	0	0	0	0	1	0	0	0	0	0	1	0	1	0	0	0	0	0	0
SPACUNK4.13c	0	0	0	0	0	0	0	0	0	0	0	0	0	0	0	0	0	0	0	1	0	0	0	0	0	0	0	0	0	0	0	0	0	0	0	0	0	0	0	0	-1	0	0	0	1	0	0	0	0
SPACUNK4.16c	0	-1	0	1	0	0	-1	1	1	1	0	-1	0	0	1	0	0	0	-1	-1	1	0	1	1	1	-1	0	1	0	1	1	1	-1	-1	0	0	0	0	0	1	0	0	0	0	-1	0	-1	0	0
SPACUNK4.17	0	0	0	0	0	0	0	0	0	0	0	1	0	0	0	0	0	0	0	0	1	0	0	1	0	0	0	0	0	1	0	0	0	0	0	0	1	1	1	0	0	1	1	0	1	1	0	0	0
SPAP14E8.05c	0	0	-1	0	0	-1	-1	0	0	0	0	-1	0	0	0	0	0	0	0	0	0	0	0	0	0	0	0	0	0	0	0	0	0	0	0	0	-1	-1	-1	0	0	0	0	0	0	0	1	0	0
SPAP27G11.12	0	1	0	0	0	-1	0	0	0	0	0	-1	0	0	0	0	0	0	0	0	1	0	0	-1	-1	1	-1	0	0	-1	0	1	0	0	1	0	1	0	0	0	1	0	1	0	0	-1	0	0	1
SPAP8A3.04c	0	0	0	0	0	0	0	0	0	0	0	0	0	0	0	0	0	0	0	0	0	0	0	0	0	1	0	0	0	0	0	1	0	0	0	0	0	0	0	0	0	0	0	0	0	0	0	0	0
SPAPB1A11.02	0	0	0	0	0	0	0	0	0	0	0	0	0	0	0	0	0	0	1	1	1	0	0	1	1	0	0	0	0	0	0	-1	1	0	0	0	-1	0	-1	0	0	0	1	0	1	0	1	0	0
SPAPB1E7.11c	1	1	0	1	1	1	0	0	0	0	0	1	0	0	0	0	0	0	1	1	1	0	1	0	0	0	0	1	0	1	1	-1	0	0	-1	0	-1	-1	-1	0	1	0	0	0	1	0	0	0	0
SPAPB24D3.08c	0	0	0	0	0	-1	0	0	0	0	0	-1	0	0	0	0	0	0	0	1	0	0	0	0	0	0	-1	0	0	0	0	0	0	0	0	0	0	0	0	0	0	0	0	0	0	0	0	0	0
SPAPB2B4.07	0	0	0	-1	0	0	1	0	0	0	0	-1	0	0	0	0	0	0	1	1	1	0	0	1	1	0	1	0	1	0	0	-1	1	-1	0	0	-1	0	-1	0	0	0	-1	0	1	0	-1	1	-1
SPBC106.10	0	-1	0	-1	-1	0	-1	-1	-1	0	0	-1	0	-1	-1	0	0	0	-1	-1	-1	-1	-1	-1	-1	-1	-1	-1	0	-1	-1	-1	-1	1	-1	1	-1	-1	-1	-1	0	1	-1	0	-1	0	0	-1	1
SPBC1105.05	-1	1	0	0	-1	-1	-1	0	0	0	-1	1	-1	-1	0	0	0	0	1	-1	-1	-1	1	-1	1	-1	-1	-1	-1	-1	-1	1	-1	1	1	1	1	0	0	-1	0	1	1	-1	1	1	0	0	0
SPBC1105.14	1	-1	-1	1	0	1	1	0	0	0	-1	1	1	-1	0	0	0	0	-1	0	1	0	1	1	1	-1	-1	-1	1	0	0	1	-1	-1	-1	-1	0	1	-1	0	1	-1	-1	0	1	0	0	0	1
SPBC119.03	0	0	0	0	0	-1	0	0	0	0	0	0	0	0	0	0	0	0	0	0	0	0	1	1	0	0	1	0	0	0	0	-1	0	0	0	0	0	0	0	0	0	0	1	0	1	0	0	0	0
SPBC119.16c	0	0	0	0	0	0	1	0	0	0	0	0	0	0	0	0	0	0	1	1	0	0	0	1	0	0	1	0	0	0	0	1	0	0	1	0	1	0	1	0	0	0	1	0	0	0	0	0	0
SPBC1198.07c	0	-1	0	0	0	0	0	0	0	0	0	1	0	0	0	0	0	0	0	0	0	0	0	-1	0	-1	1	0	1	0	0	1	0	0	0	0	1	0	0	0	1	0	0	0	1	0	0	0	1
SPBC1198.11c	-1	-1	0	1	0	1	0	-1	-1	-1	-1	1	-1	-1	-1	0	-1	0	-1	-1	0	0	1	-1	-1	1	1	0	1	1	0	0	-1	1	-1	0	-1	-1	-1	-1	-1	1	1	1	1	1	-1	1	1
SPBC1198.14c	0	-1	0	0	0	1	1	0	0	0	0	-1	0	0	0	0	0	0	0	-1	1	0	0	1	0	0	0	0	0	0	0	1	0	0	0	0	0	0	0	0	1	0	0	0	1	0	-1	0	0
SPBC11B10.10c	-1	-1	-1	1	0	0		1	1	0	0	-1	-1	0	0	0	0	0	0	-1	-1	0	-1	-1	-1	-1	-1	1	0	0	0	1	1	1	-1	1	-1	-1	-1	1	1	-1	1	-1	-1	-1	-1	1	1
SPBC14C8.15	0	1	0	0	0	0	0	0	0	0	0	0	-1	0	0	0	0	0	0	0	1	0	0	0	0	-1	1	0	0	0	0	1	0	0	0	0	1	1	1	0	0	0	0	0	-1	0	1	0	1
SPBC14C8.16c	0	-1	0	-1	-1	0	-1	-1	-1	0	0	-1	0	0	-1	0	0	0	-1	-1	-1	0	-1	-1	1	0	-1	-1	0	-1	-1	-1	-1	1	-1	0	-1	-1	-1	-1	-1	1	-1	0	-1	0	0	-1	0
SPBC14F5.10c	0	1	0	0	0	0	1	0	0	0	0	0	0	0	0	0	0	0	0	-1	-1	0	-1	0	0	-1	-1	0	0	0	0	1	1	0	0	0	0	0	0	0	1	0	-1	0	-1	0	1	0	-1
SPBC1539.02	0	0	0	0	0	-1	0	0	0	0	0	0	0	0	0	0	0	0	0	0	-1	0	0	0	0	0	0	0	0	0	0	0	0	0	0	0	0	0	1	0	0	0	0	0	0	0	0	0	0
SPBC15C4.06c	0	0	0	1	0	0	1	0	0	0	0	0	0	0	0	0	0	0	0	0	0	0	0	0	0	0	1	0	0	0	1	1	0	-1	0	0	0	0	1	0	0	0	0	0	0	0	1	0	0
SPBC15D4.05	0	1	-1	-1	0	1	0	0	0	0	0	-1	0	0	0	0	0	0	0	0	0	0	1	0	1	1	-1	0	0	0	0	-1	0	0	1	0	0	0	0	0	-1	-1	1	0	-1	0	-1	0	-1
SPBC1604.16c	0	0	0	0	0	0	0	0	0	0	0	0	0	0	0	0	0	0	0	0	0	0	0	0	1	0	0	0	0	0	0	0	0	0	0	0	0	0	0	0	0	0	0	0	0	0	0	0	0
SPBC16A3.02c	0	0	0	-1	0	0	0	0	0	0	0	0	0	0	0	0	0	0	0	1	1	0	0	0	0	0	0	0	0	0	0	-1	0	0	0	0	-1	-1	-1	0	0	0	-1	0	1	0	0	0	-1
SPBC16A3.08c	-1	1	-1	-1	0	1	-1	1	1	0	0	1	-1	-1	0	0	0	0	-1	1	1	0	1	-1	-1	1	-1	-1	1	-1	-1	-1	0	0	0	1	-1	0	-1	0	1	-1	1	0	-1	1	-1	0	1
SPBC16C6.01c	0	0	-1	-1	-1	-1	-1	0	0	0	0	-1	0	0	0	0	0	0	0	-1	0	0	1	1	1	1	-1	1	0	1	1	-1	1	0	0	-1	-1	0	0	-1	1	0	0	0	1	1	1	0	1
SPBC16D10.08c	-1	1	0	0	1	-1	1	0	0	0	0	-1	-1	0	0	0	0	0	-1	1	1	0	-1	0	-1	0	-1	0	0	0	0	-1	1	0	1	0	1	1	1	1	-1	1	0	-1	1	0	1	1	1
SPBC16E9.13	0	-1	1	-1	0	1	0	1	1	0	0	1	0	0	0	0	0	0	1	-1	-1	0	-1	-1	-1	1	1	1	0	0	0	1	-1	0	0	-1	-1	0	-1	-1	0	0	-1	-1	1	0	0	0	0
SPBC16E9.16c	0	-1	0	-1	0	0	0	0	0	0	0	-1	0	0	0	0	0	0	1	-1	0	0	1	0	0	0	0	0	0	0	0	-1	0	0	-1	0	0	0	0	0	0	0	0	1	0	0	0	0	0
SPBC16H5.13	0	-1	0	-1	0	0	0	0	0	0	0	1	0	1	0	0	0	0	1	1	1	1	-1	0	0	1	1	0	0	0	0	-1	1	-1	-1	0	1	1	0	0	-1	0	0	1	1	0	-1	1	1
SPBC16H5.14c	0	-1	0	1	0	-1	0	0	0	0	0	0	0	0	0	0	0	0	0	1	0	0	1	1	0	-1	0	1	0	0	0	0	0	0	0	0	-1	-1	-1	0	-1	0	0	0	1	0	0	1	0
SPBC1709.09	0	1	0	1	0	1	0	-1	-1	-1	0	1	0	-1	-1	-1	-1	0	1	1	1	0	1	1	-1	1	1	-1	0	-1	0	-1	-1	-1	-1	0	-1	-1	-1	-1	1	0	1	0	1	0	1	0	1
SPBC1778.07	0	1	0	-1	0	1	0	0	0	0	0	0	0	0	0	0	0	0	0	1	1	0	1	0	0	0	1	0	0	0	0	-1	0	0	-1	0	0	0	0	0	0	0	-1	1	0	0	0	0	0
SPBC17G9.07	-1	-1	-1	-1	-1	1	0	1	1	0	0	-1	-1	-1	1	1	0	0	-1	-1	-1	0	-1	-1	1	1	-1	-1	1	0	0	-1	1	1	-1	1	-1	-1	-1	-1	0	-1	-1	1	-1	0	-1	0	1
SPBC17G9.09	0	1	0	0	0	0	0	0	0	0	0	1	0	0	0	0	0	0	0	0	1	0	1	0	1	0	0	0	0	1	0	-1	0	0	0	0	0	1	0	0	0	0	0	0	1	0	0	0	0
SPBC1861.02	1	-1	0	1	1	1	1	-1	0	0	0	1	0	0	0	0	0	0	1	-1	1	0	-1	-1	1	1	1	-1	-1	-1	-1	1	0	0	0	0	-1	0	0	0	1	-1	-1	-1	-1	1	1	0	0
SPBC18A7.01	0	0	0	0	0	0	0	0	0	0	0	0	0	0	0	0	0	0	0	0	0	0	0	1	0	0	0	0	0	0	0	1	0	0	0	0	0	0	0	0	0	0	0	0	0	0	1	0	0
SPBC18E5.10	0	1	1	-1	0	-1	-1	0	0	0	0	-1	0	0	0	0	0	0	0	-1	-1	0	0	0	1	0	-1	-1	1	0	0	0	0	0	0	0	0	0	1	0	0	-1	-1	0	-1	0	-1	-1	0
SPBC18H10.02	-1	1	-1	-1	-1	-1	-1	0	0	0	0	1	-1	-1	0	-1	1	0	1	-1	-1	-1	1	-1	1	1	-1	-1	-1	-1	-1	1	-1	1	-1	-1	-1	-1	-1	-1	-1	-1	-1	-1	-1	-1	-1	-1	-1
SPBC18H10.04c	0	-1	1	1	0	-1	1	-1	-1	-1	0	1	1	-1	0	0	-1	0	1	-1	1	0	1	1	1	1	-1	-1	0	-1	-1	1	-1	0	1	1	1	1	1	0	1	-1	-1	0	-1	0	1	-1	1
SPBC18H10.05	0	0	0	0	0	-1	0	0	0	0	0	1	0	0	0	0	0	0	0	0	1	0	0	1	0	-1	-1	-1	0	0	-1	-1	0	0	0	0	0	0	0	0	0	0	1	0	1	0	1	0	0
SPBC19C7.01	0	0	0	1	0	0		0	0	0	0	1	0	0	0	0	0	0	0	1	1	0	1	0	0	1	1	0	0	0	0	-1	1	0	0	0	0	0	0	0	0	0	0	0	1	0	1	0	0
SPBC1D7.03	-1	1	0	-1	0	-1	0	0	0	0	0	-1	-1	-1	0	0	0	0	0	1	-1	0	1	-1	-1	-1	-1	-1	0	-1	0	-1	-1	0	1	1	1	1	1	0	-1	0	-1	-1	-1	0	-1	1	-1
SPBC20F10.02c	0	0	0	0	0	0	0	0	0	0	0	-1	0	0	0	0	0	0	0	0	0	0	0	-1	0	-1	0	0	0	0	0	-1	0	0	0	0	0	0	0	0	1	0	0	0	0	0	0	1	-1
SPBC20F10.03	0	0	0	0	0	0	-1	0	0	0	0	0	0	0	0	0	0	0	0	0	1	0	0	0	0	0	0	0	0	0	0	-1	0	-1	0	0	1	1	0	0	0	0	0	0	0	0	1	0	0
SPBC21.03c	0	1	0	-1	0	0	0	0	0	0	0	-1	0	0	0	0	0	0	0	1	1	0	-1	0	-1	0	-1	0	0	0	0	-1	0	0	-1	0	-1	0	-1	0	-1	0	-1	0	1	0	0	0	0
SPBC215.05	0	-1	1	1	1	1	1	-1	-1	-1	1	1	0	0	0	-1	0	1	-1	-1	1	0	1	-1	-1	-1	0	-1	1	-1	0	1	-1	0	-1	1	-1	1	-1	-1	1	-1	1	1	-1	1	-1	0	1
SPBC215.06c	0	0	0	0	0	-1	0	1	1	1	0	0	0	0	0	0	1	0	0	1	0	0	1	0	1	-1	0	0	0	0	0	0	0	0	0	0	0	1	0	0	0	0	0	0	0	0	1	0	1
SPBC21C3.03	0	1	-1	-1	-1	-1	-1	-1	-1	0	0	1	0	-1	0	0	0	0	-1	1	1	1	-1	1	-1	0	0	-1	0	-1	-1	-1	0	1	1	1	1	-1	1	0	1	0	1	-1	0	1	0	1	-1
SPBC21C3.08c	0	0	0	0	0	0	-1	0	0	0	0	1	0	0	0	0	0	0	0	0	0	0	0	0	0	0	0	0	0	0	0	-1	1	0	0	0	-1	0	0	0	0	0	0	0	1	0	0	0	0
SPBC21C3.14c	0	-1	0	1	0	0	0	0	0	0	0	1	0	0	0	0	0	0	0	-1	0	0	-1	0	0	0	1	1	0	1	1	1	0	0	-1	0	0	0	0	1	1	0	-1	0	0	0	0	0	-1
SPBC21C3.18	0	0	0	0	1	0	1	0	0	0	0	0	0	0	0	0	0	0	0	1	1	0	1	0	0	0	1	0	0	0	0	-1	0	0	0	0	-1	0	-1	0	0	0	-1	0	1	1	0	0	0
SPBC25B2.04c	-1	1	1	1	0	-1	1	-1	-1	-1	0	1	-1	-1	-1	-1	-1	0	0	1	1	1	0	0	-1	1	1	-1	1	-1	-1	1	-1	0	0	0	1	1	1	-1	1	0	1	0	1	1	-1	1	1
SPBC25H2.14	0	-1	0	-1	0	-1	1	0	0	0	0	0	0	0	0	0	0	0	0	0	0	0	1	0	0	0	0	0	0	1	1	-1	0	-1	0	-1	-1	0	-1	0	1	0	0	0	1	0	1	0	-1
SPBC28F2.03	0	-1	-1	-1	0	-1	-1	0	0	0	0	1	0	0	0	0	0	0	0	1	1	0	1	1	1	-1	0	0	-1	0	0	0	-1	-1	-1	0	-1	0	-1	1	-1	0	-1	0	1	-1	0	0	-1
SPBC2D10.03c	0	0	0	0	0	1	-1	1	0	0	1	1	0	0	0	0	0	0	0	0	0	0	0	1	0	0	1	0	0	0	0	1	0	0	0	0	0	0	0	0	-1	0	-1	0	0	0	0	0	0
SPBC2D10.05	0	-1	0	0	0	0	1	0	0	0	0	0	0	0	0	0	0	0	0	0	1	0	1	0	0	0	0	0	0	0	0	1	0	0	0	0	0	0	0	0	0	0	0	0	0	0	0	0	0
SPBC2G2.06c	0	1	-1	0	0	0	0	0	0	0	0	-1	0	0	0	0	0	0	0	-1	0	0	1	-1	1	-1	-1	1	0	1	0	-1	1	0	0	0	0	0	0	0	0	0	0	0	-1	0	0	0	0
SPBC30D10.10c	0	-1	1	-1	-1	-1	-1	-1	-1	0	0	-1	-1	1	0	0	0	-1	-1	-1	-1	-1	-1	-1	-1	0	-1	-1	0	-1	-1	-1	-1	1	-1	0	-1	-1	-1	-1	1	1	-1	0	-1	0	-1	-1	1
SPBC30D10.13c	0	1	1	1	0	0	0	1	1	0	0	1	-1	1	0	0	0	0	-1	1	1	0	0	1	1	0	1	0	0	0	0	0	-1	-1	-1	0	-1	0	0	0	1	0	1	0	1	0	-1	1	0
SPBC31E1.01c	0	0	1	-1	0	1	0	0	0	0	0	1	0	0	0	0	0	0	1	0	1	0	0	0	0	1	0	0	0	0	1	1	0	0	0	1	0	0	0	0	1	0	1	0	1	0	-1	1	1
SPBC32F12.03c	0	-1	0	0	0	1	-1	-1	-1	0	0	0	0	0	0	0	0	0	0	1	0	0	1	0	0	0	0	-1	0	0	-1	-1	0	0	0	0	1	0	0	-1	1	0	0	0	1	0	0	1	0
SPBC32H8.03	0	1	-1	0	0	0	0	0	0	0	0	-1	0	0	0	0	0	0	0	1	1	0	1	0	0	-1	1	1	0	0	1	1	-1	0	0	0	-1	0	-1	1	-1	0	1	0	0	0	-1	0	-1
SPBC36.07	0	-1	0	-1	-1	0	-1	0	0	1	0	-1	-1	0	0	0	0	0	-1	-1	-1	0	-1	-1	-1	1	-1	-1	0	0	0	-1	-1	1	-1	0	-1	-1	-1	-1	1	1	-1	0	-1	0	-1	0	0
SPBC365.12c	0	0	0	0	0	1	0	0	0	0	0	-1	0	0	0	0	0	0	0	0	-1	0	1	0	-1	0	0	0	0	1	0	-1	0	0	0	0	-1	-1	-1	0	-1	0	-1	0	0	0	1	0	0
SPBC365.20c	0	-1	0	0	0	0	-1	0	0	0	0	0	0	0	0	0	0	0	0	0	1	0	0	0	1	0	-1	0	0	0	0	0	0	0	0	0	-1	0	-1	0	0	0	0	0	1	0	0	0	0
SPBC3B8.02	0	-1	-1	-1	-1	1	-1	-1	-1	0	0	-1	0	-1	0	0	0	0	-1	-1	-1	0	-1	-1	-1	0	-1	-1	1	0	0	-1	-1	1	-1	0	-1	-1	-1	-1	0	-1	-1	0	-1	1	-1	-1	-1
SPBC3B8.08	0	0	0	-1	0	0	0	0	0	0	0	1	0	0	0	0	0	0	0	-1	0	0	0	0	0	0	1	0	0	0	0	-1	0	0	0	0	-1	-1	-1	0	1	-1	0	0	0	0	0	0	-1
SPBC3E7.07c	0	1	0	0	0	0		0	0	0	0	0	0	0	0	0	0	0	0	0	0	0	0	0	0	0	0	0	0	0	0	0	0	0	0	0	1	0	1	0	0	0	0	0	0	0	0	0	0
SPBC3H7.03c	0	-1	1	-1	-1	-1	-1	-1	-1	-1	-1	-1	-1	-1	-1	0	0	-1	-1	-1	-1	-1	-1	-1	-1	-1	-1	-1	0	0	0	-1	-1	1	-1	1	-1	-1	-1	-1	1	1	-1	0	-1	0	-1	-1	1
SPBC3H7.10	0	-1	1	-1	-1	0	-1	-1	-1	-1	-1	-1	-1	0	-1	0	0	-1	-1	-1	-1	-1	-1	-1	-1	0	-1	-1	0	-1	-1	-1	-1	1	-1	0	-1	-1	-1	-1	1	0	-1	0	-1	0	0	-1	1
SPBC409.07c	0	-1	0	-1	0	0	-1	-1	-1	-1	-1	-1	-1	0	0	0	-1	-1	-1	-1	-1	-1	-1	-1	0	1	-1	-1	0	-1	-1	-1	-1	1	-1	1	-1	-1	-1	-1	-1	1	-1	0	-1	0	0	-1	1
SPBC428.08c	0	-1	0	0	0	0	0	0	0	0	0	1	0	0	0	0	0	0	0	-1	0	0	0	0	1	0	0	0	0	0	0	-1	1	0	-1	0	-1	-1	-1	0	0	-1	0	0	0	0	0	0	-1
SPBC428.15	0	1	0	0	0	0	0	0	0	0	0	0	0	0	0	0	0	0	0	0	0	0	0	0	0	0	0	0	0	0	0	1	0	0	0	0	1	1	1	0	0	0	0	0	0	0	0	0	0
SPBC4F6.08c	-1	1	1	1	1	1	1	-1	-1	-1	-1	1	-1	-1	-1	-1	-1	0	1	1	1	1	1	0	-1	1	1	-1	1	-1	-1	1	-1	0	1	1	1	1	1	-1	1	-1	1	1	1	0	0	1	1
SPBC543.07	-1	-1	-1	-1	1	1	1	0	0	-1	0	-1	0	-1	0	0	0	0	1	1	1	1	0	-1	-1	0	-1	-1	0	-1	0	-1	-1	0	0	0	1	1	1	0	1	-1	1	0	-1	-1	-1	1	-1
SPBC646.09c	0	-1	1	-1	-1	0	-1	1	1	1	1	-1	0	1	0	0	0	0	-1	-1	-1	-1	-1	-1	-1	0	-1	-1	0	-1	0	-1	-1	1	-1	0	-1	-1	-1	-1	-1	-1	-1	0	-1	1	-1	-1	1
SPBC646.13	0	1	0	0	0	0		0	0	0	0	0	0	0	0	0	0	0	0	0	0	0	0	0	0	0	1	0	0	0	0	1	1	0	0	0	0	0	0	0	0	0	0	0	0	0	0	0	0
SPBC649.04	0	-1	0	-1	0	0	0	0	0	0	0	0	0	0	0	0	0	0	0	0	1	0	-1	-1	0	0	1	0	0	0	0	-1	0	0	0	0	0	-1	0	0	-1	0	0	0	1	0	0	0	0
SPBC660.10	-1	1	0	1	0	0	1	-1	-1	-1	0	0	-1	-1	-1	0	-1	0	1	1	1	0	1	0	-1	1	1	0	0	0	0	1	-1	0	0	-1	1	1	1	-1	1	0	1	0	1	0	0	1	1
SPBC685.04c	0	1	0	0	0	0	0	0	0	0	0	-1	0	0	0	0	0	0	0	0	0	0	1	-1	0	0	-1	0	0	0	0	-1	0	0	0	0	1	0	0	0	1	-1	1	0	-1	0	0	0	1
SPBC691.03c	0	1	-1	0	-1	0	0	0	0	0	0	-1	0	0	0	0	0	0	0	0	0	0	1	-1	1	-1	-1	0	-1	0	0	-1	0	0	1	0	0	0	0	0	0	-1	1	-1	-1	0	1	0	1
SPBC725.11c	-1	1	1	1	-1	0	0	1	1	0	1	1	0	1	0	0	0	0	0	0	1	0	1	0	1	-1	1	0	0	0	0	-1	1	-1	0	-1	1	1	1	0	1	0	1	0	1	1	0	-1	1
SPBC776.01	0	0	0	0	0	-1	0	0	0	0	0	1	0	0	0	0	0	0	0	-1	0	0	1	-1	1	1	-1	-1	0	0	0	-1	0	0	0	0	0	0	-1	0	0	-1	-1	0	-1	0	0	0	1
SPBC947.05c	0	0	0	0	0	0	0	0	0	0	0	1	0	0	0	0	0	0	0	-1	0	0	-1	-1	0	0	1	0	0	0	1	0	0	-1	0	0	0	0	0	0	0	0	0	0	0	0	1	0	0
SPBC947.09	0	1	-1	0	0	0	0	0	0	0	0	1	0	0	0	0	0	0	0	0	0	0	1	-1	-1	0	0	0	0	0	0	-1	0	-1	0	1	0	0	0	0	0	1	0	0	-1	-1	0	0	0
SPBC9B6.03	1	1	0	1	0	0		0	0	0	0	-1	0	-1	0	0	0	0	-1	0	1	0	1	1	-1	0	1	0	-1	0	0	-1	1	0	0	0	-1	0	0	0	1	-1	1	0	1	0	1	0	-1
SPBP22H7.04	0	0	0	1	0	0	1	0	0	0	0	0	0	0	0	0	0	0	0	0	1	0	0	0	0	0	0	0	0	0	0	0	-1	0	1	0	0	1	0	0	0	0	0	0	0	0	0	0	1
SPBP35G2.11c	0	0	0	0	0	0	-1	0	0	0	0	0	0	0	0	0	0	0	0	0	1	0	0	1	-1	-1	-1	0	0	0	0	-1	1	0	0	0	-1	-1	-1	0	-1	-1	-1	0	1	0	0	0	0
SPBP8B7.27	0	0	0	0	0	0	0	0	0	0	0	-1	0	0	0	0	0	0	1	0	0	0	0	1	0	0	1	0	0	0	0	0	0	0	-1	0	-1	0	-1	0	0	-1	0	0	1	0	0	0	0
SPBP8B7.31	0	1	1	0	1	0	1	0	0	0	0	1	0	0	0	0	0	0	0	1	1	0	1	1	1	0	1	1	1	0	0	0	0	0	1	0	1	0	1	0	0	-1	0	0	1	0	0	0	-1
SPBPB21E7.04c	0	0	0	0	0	0	0	0	0	0	0	0	0	0	0	0	0	0	1	0	0	0	0	0	0	-1	0	0	0	0	0	-1	0	-1	-1	0	-1	-1	-1	0	0	0	-1	0	1	0	0	0	0
SPBPJ4664.05	0	0	0	0	0	0	0	0	0	0	0	0	0	0	0	0	0	0	0	0	0	0	0	0	1	0	0	0	0	0	0	0	0	0	0	0	0	0	0	0	0	0	0	0	1	0	1	0	-1
SPCC1020.08	0	0	0	0	0	1	1	0	0	0	0	0	0	0	0	0	0	0	0	0	0	0	0	-1	0	0	1	1	0	0	0	1	0	0	0	0	0	0	0	0	0	-1	1	0	-1	0	0	0	-1
SPCC1235.03	0	-1	0	0	0	0	-1	0	0	0	0	0	0	0	0	0	0	0	0	0	-1	0	0	0	0	0	0	0	0	0	0	-1	0	0	-1	0	1	0	1	0	-1	0	0	0	0	0	0	0	-1
SPCC1259.02c	0	-1	1	-1	-1	-1	-1	0	0	0	0	-1	0	1	0	0	0	0	-1	-1	-1	0	-1	-1	-1	0	-1	0	0	0	0	-1	0	1	-1	0	-1	-1	-1	-1	-1	1	-1	0	-1	0	0	-1	1
SPCC126.12	0	-1	0	0	0	0		0	0	0	0	0	0	0	0	0	0	0	0	1	0	0	1	0	1	0	-1	0	0	0	0	-1	1	0	0	0	-1	-1	-1	0	-1	0	0	0	-1	-1	0	0	0
SPCC1393.13	-1	1	-1	0	0	-1	0	1	1	1	0	-1	0	-1	1	1	0	0	0	1	1	0	1	1	0	1	-1	-1	0	-1	0	1	1	1	1	0	1	1	1	1	-1	-1	1	0	-1	0	1	1	0
SPCC13B11.01	0	-1	-1	-1	0	1	-1	-1	-1	0	0	-1	0	0	0	0	0	0	-1	-1	-1	0	1	-1	1	0	-1	-1	0	-1	-1	-1	-1	1	-1	0	-1	-1	-1	-1	-1	1	-1	0	-1	0	0	-1	1
SPCC1494.08c	-1	-1	1	1	1	1	0	1	1	1	0	-1	-1	0	0	1	1	0	-1	0	-1	0	1	1	0	1	-1	0	0	0	0	-1	-1	0	1	-1	0	0	0	0	-1	-1	-1	0	-1	-1	-1	1	1
SPCC162.12	0	0	-1	0	0	0	0	0	0	0	0	0	0	0	0	0	0	0	0	0	1	0	1	0	1	-1	1	0	0	0	0	-1	0	0	0	0	0	0	0	0	0	0	1	0	1	-1	-1	0	0
SPCC1620.03	0	0	0	0	0	0	0	0	0	0	0	-1	0	0	0	0	0	0	0	1	0	0	1	0	1	0	1	0	0	0	0	0	0	0	0	0	-1	0	0	-1	0	0	1	0	1	0	0	0	1
SPCC16A11.08	0	1	0	-1	1	1	0	0	0	0	0	-1	0	0	0	0	0	0	1	-1	-1	0	0	0	0	0	0	0	0	0	0	-1	0	0	-1	0	0	0	-1	0	0	-1	-1	1	-1	1	0	0	0
SPCC16C4.11	0	-1	1	-1	-1	-1		0	0	0	0	-1	0	0	0	0	0	0	-1	-1	-1	0	0	-1	-1	-1	-1	0	0	-1	-1	-1	0	1	-1	0	-1	-1	-1	-1	0	1	-1	0	-1	0	-1	-1	1
SPCC1753.02c	-1	1	-1	-1	-1	0	0	0	0	0	1	-1	-1	-1	0	0	0	0	-1	-1	-1	0	-1	-1	-1	0	-1	-1	1	-1	-1	-1	0	1	-1	0	-1	-1	-1	-1	1	1	-1	0	-1	0	0	-1	-1
SPCC188.02	0	-1	1	-1	0	1	-1	-1	-1	0	1	-1	0	0	0	0	0	1	-1	-1	-1	0	-1	-1	1	1	-1	-1	1	0	0	-1	0	1	-1	1	-1	-1	-1	-1	0	1	-1	1	-1	-1	-1	0	1
SPCC18B5.03	0	1	0	0	0	0	1	0	0	0	0	1	0	0	0	0	0	0	0	1	0	0	0	0	-1	0	0	0	0	0	0	0	0	0	0	0	1	0	0	0	0	0	0	0	1	0	0	0	0
SPCC24B10.18	0	1	0	1	1	0	1	0	0	0	-1	1	0	0	0	0	0	0	0	-1	1	-1	1	0	1	0	-1	0	0	0	0	-1	1	0	1	0	1	1	1	0	1	1	1	0	1	0	1	0	0
SPCC320.03	0	1	0	0	0	0		1	1	1	1	-1	0	0	0	0	0	0	0	-1	0	0	0	0	-1	0	0	0	0	0	0	-1	0	-1	0	0	1	1	0	0	-1	-1	1	0	-1	0	0	0	0
SPCC320.07c	0	0	0	0	1	1	1	0	0	0	0	0	0	0	0	0	0	0	1	1	1	0	1	0	-1	0	0	1	0	1	1	-1	1	0	0	0	-1	0	-1	0	0	0	-1	0	1	0	0	0	0
SPCC338.04	0	-1	0	0	1	1	1	1	1	1	0	0	0	0	0	0	1	0	0	0	-1	0	0	0	-1	-1	-1	0	0	0	0	-1	0	0	-1	0	-1	0	-1	0	-1	-1	-1	0	1	0	1	0	0
SPCC4B3.03c	0	-1	-1	-1	0	1	0	0	0	0	0	-1	0	0	0	0	0	0	1	-1	1	0	1	0	0	-1	0	0	0	0	0	-1	-1	0	0	0	-1	-1	-1	0	-1	0	1	0	1	0	1	0	1
SPCC4B3.12	0	0	0	1	0	0	0	0	0	0	0	1	0	0	0	0	1	0	1	1	1	1	1	1	1	-1	1	0	0	0	0	0	1	-1	-1	1	-1	-1	-1	0	-1	0	0	0	1	0	1	0	-1
SPCC4G3.09c	0	-1	1	1	0	0	1	0	0	0	0	1	0	0	0	0	0	0	0	1	1	0	-1	-1	-1	-1	1	0	0	0	0	1	1	-1	-1	0	-1	-1	-1	0	1	0	-1	0	0	0	0	0	-1
SPCC4G3.12c	0	0	0	-1	0	0	0	0	0	0	0	0	0	0	0	0	0	0	0	0	1	0	0	0	0	0	0	0	1	0	0	1	0	0	0	0	-1	0	-1	0	0	0	-1	1	-1	0	0	0	0
SPCC4G3.17	0	1	0	1	0	1	0	0	0	0	0	0	0	0	0	0	0	0	1	1	1	0	1	1	1	0	0	1	0	0	1	1	0	0	0	0	-1	0	-1	0	0	-1	1	0	1	0	1	0	0
SPCC553.01c	0	-1	1	-1	-1	-1	-1	-1	-1	0	1	-1	0	-1	0	0	0	0	-1	-1	-1	0	-1	-1	0	0	-1	-1	0	-1	-1	-1	-1	1	-1	0	-1	-1	-1	-1	1	1	-1	0	-1	0	-1	-1	0
SPCC5E4.10c	0	-1	0	0	0	-1	0	0	0	0	0	0	0	0	0	0	0	0	0	-1	0	0	1	0	0	-1	0	0	-1	0	0	-1	0	0	0	0	-1	-1	-1	0	-1	-1	-1	0	1	0	0	0	0
SPCC613.03	0	1	0	1	0	1		0	0	0	0	-1	0	1	0	0	0	0	1	0	1	1	0	-1	-1	-1	-1	0	0	0	0	0	1	1	1	-1	0	0	0	0	1	0	-1	1	1	0	0	0	0
SPCC622.11	0	0	0	0	0	1	0	0	0	0	0	0	0	0	0	0	0	0	0	0	1	0	0	0	0	0	-1	0	0	0	0	-1	0	0	0	0	-1	0	-1	0	0	0	0	0	1	0	0	0	-1
SPCC63.03	0	0	0	0	1	1	1	-1	-1	0	0	0	0	0	0	0	0	0	0	0	0	0	1	1	0	0	1	1	0	0	0	1	1	0	-1	0	-1	0	-1	0	0	0	1	0	1	0	0	0	0
SPCC63.06	-1	1	0	1	1	1		1	1	1	1	1	0	0	1	1	1	1	0	1	1	1	1	1	1	1	0	-1	1	1	1	-1	1	1	1	-1	1	1	1	1	1	0	1	1	1	-1	0	1	1
SPCC663.06c	0	1	0	-1	0	0	0	0	0	0	0	0	0	0	0	0	0	0	0	0	0	0	0	0	0	0	0	0	0	0	0	0	0	0	0	0	0	0	0	0	0	0	-1	0	0	0	1	0	0
SPCC736.13	0	-1	0	0	-1	-1	0	0	0	0	0	-1	0	0	0	0	0	0	0	0	0	0	0	0	0	0	0	0	0	0	0	-1	0	0	0	0	0	0	0	0	0	0	1	0	0	0	0	0	0
SPCC794.03	0	0	0	1	1	1		0	0	0	0	1	0	0	0	0	0	0	1	1	1	0	1	1	0	0	1	1	0	0	1	1	1	0	0	0	-1	-1	-1	0	-1	-1	0	0	1	0	1	0	0
SPCC962.05	0	0	0	0	0	0	0	0	0	0	0	0	0	0	0	0	0	0	1	0	0	0	0	1	0	0	1	0	0	0	0	1	0	0	0	0	0	0	1	0	0	0	1	0	0	1	1	0	0
SPCC965.12	0	0	1	0	1	0		0	0	0	0	1	0	0	0	0	0	0	1	1	1	0	1	1	1	-1	0	1	0	0	0	0	1	1	0	1	-1	-1	-1	0	-1	1	0	0	1	0	1	0	0
SPCP31B10.02	0	1	-1	0	0	0		0	0	0	0	0	0	0	0	0	0	0	1	1	1	0	0	0	0	0	1	-1	0	-1	-1	-1	0	0	0	0	1	0	1	0	0	0	-1	0	0	0	0	0	0
[truncated: 59 more columns]

## Sheet: cluster_members
gene	cluster	Gene name	Product description	Synonyms	Budding yeast orthologs	Human orthologs	Deletion viability	Characterisation status
SPAC1610.02c	1	mrpl1	mitochondrial ribosomal protein subunit L1 (predicted)		MRPL1	MRPL1	viable	biological role inferred
SPAC16E8.01	1	shd1	cytoskeletal protein binding protein Sla1 family, Shd1 (predicted)	sla1	SLA1		viable	biological role inferred
SPBC3H7.03c	1	kgd1	2-oxoglutarate dehydrogenase (lipoamide) (e1 component of oxoglutarate dehydrogenase complex) (predicted)		KGD1	OGDHL,OGDH	depends_on_conditions	biological role inferred
SPBC3B8.02	1	php5	CCAAT-binding factor complex subunit Php5		HAP5	NFYC	viable	published
SPAC3A12.13c	1	tif310	translation initiation factor eIF3j (p35)	hcr1	HCR1	EIF3J	viable	published
SPAC17H9.04c	1	nrp1	nucleolar RNA-binding protein, human TEX13A and TEX13B ortholog, implicated in mRNA processing		NRP1	TEX13A,TEX13B	viable	conserved unknown
SPAC1805.07c	1	dad2	DASH complex subunit Dad2	hos2	DAD2		viable	published
SPBC36.07	1	elp1	elongator complex WD repeat protein Elp1	iki3	IKI3	ELP1	viable	published
SPBC1198.11c	1	reb1	RNA polymerase I transcription termination factor/ RNA polymerase II transcription factor Reb1	SPBC660.01c	REB1,NSI1	TTF1	viable	published
SPBC30D10.10c	1	tor1	serine/threonine protein kinase Tor1		TOR1,TOR2	MTOR	viable	published
SPAC19G12.15c	1	tpp1	trehalose-6-phosphate phosphatase Tpp1		TPS2		viable	published
SPBC11B10.10c	1	pht1	histone H2A variant H2A.Z, Pht1		HTZ1		viable	published
SPAC694.06c	1	mrc1	claspin, Mrc1		MRC1	CLSPN	viable	published
SPBC215.05	1	gpd1	glycerol-3-phosphate dehydrogenase Gpd1		GPD1	GPD1L,GPD1	viable	published
SPAC29A4.20	1	elp3	elongator complex tRNA uridine(34) acetyltransferase subunit Elp3	kat9	ELP3	ELP3	viable	published
SPBC1D7.03	1	clg1	cyclin-like protein involved in autophagy Clg1 (predicted)	mug80,SPBC1D7.03c	CLG1		viable	biological role inferred
SPBC18H10.04c	1	sce3	translation initiation factor (predicted)	tif48	TIF3	EIF4B	viable	published
SPAC227.17c	1		DUF3128 family, human c22orf39 ortholog		EMI1	C22orf39	viable	conserved unknown
SPAC27E2.03c	1		Obg-like ATPase, human OLA1 ortholog (predicted)		OLA1	OLA1	viable	conserved unknown
SPBC18E5.10	1		mitochondrial iron-sulfur cluster protein (predicted)			NDUFV1	viable	conserved unknown
SPBC14C8.16c	1	bot1	mitochondrial ribosomal protein subunit S35		MRPS35		depends_on_conditions	published
SPBC17G9.07	1	rps2402	40S ribosomal protein S24 (predicted)	rps24-2	RPS24A,RPS24B	RPS24	viable	biological role inferred
SPBC3H7.10	1	elp6	elongator complex subunit Elp6		ELP6	ELP6	viable	published
SPBC409.07c	1	wis1	MAP kinase kinase Wis1	spc2,smf2,sty2	PBS2	MAP2K1,MAP2K2	viable	published
SPAC23D3.04c	1	gpd2	glycerol-3-phosphate dehydrogenase Gpd2		GPD1	GPD1L,GPD1	viable	published
SPCC1753.02c	1	git3	G-protein coupled receptor Git3		GPR1		viable	published
SPCC553.01c	1	dbl2	DNA recombination protein Dbl2	SPCC736.01c	MTE1	ZGRF1	viable	published
SPAC56F8.02	1		AMP binding enzyme, human DIP2 family (predicted)		CMR2	DIP2A,DIP2C,DIP2B	viable	conserved unknown
SPCC188.02	1	par1	protein phosphatase PP2A regulatory subunit B-56 Par1	pbp1	RTS1	PPP2R5A,PPP2R5B,PPP2R5C,PPP2R5D,PPP2R5E	viable	published
1343	1
SPCC16C4.11	1	pef1	Pho85/PhoA-like cyclin-dependent kinase Pef1	p31	PHO85	CDK5	viable	published
SPAC3H5.10	1	rpl3202	60S ribosomal protein L32 (predicted)	rpl32-2,rpl32	RPL32	RPL32	viable	biological role inferred
989	1
SPAC8C9.06c	1	ppr4	mitochondrial Cox1 translation regulator Ppr4		PET309		viable	published
SPAC1071.07c	1	rps1502	40S ribosomal protein S15 (predicted)	rps15-2,rps15	RPS15	RPS15	viable	biological role inferred
SPCC1259.02c	1	erm1	ER metallopeptidase Erm1 (predicted)	ppp61	PFF1	ERMP1	viable	conserved unknown
SPAC637.07	1	moe1	translation initiation factor eIF3d	tif304		EIF3D	viable	published
SPBC106.10	1	pka1	cAMP-dependent protein kinase catalytic subunit Pka1	tpk,git6,sam1,sam5,sam6,sam7	TPK1,TPK3,TPK2	PRKACA,PRKACB,PRKACG,PRKX	viable	published
SPBC646.09c	1	int6	translation initiation factor eIF3e	yin6,tif305		EIF3E	viable	published
SPBC543.07	1	pek1	MAP kinase kinase Pek1	skh1,mkk1	MKK1,MKK2	MAP2K1,MAP2K2	viable	published
SPCC13B11.01	1	adh1	alcohol dehydrogenase Adh1	adh	ADH5,ADH3,ADH2,ADH1		viable	published
SPAC821.05	1	tif308	translation initiation factor eIF3h (p40)	eif8,tif38		EIF3H	viable	published
SPAC6G10.10c	2
SPAC6F12.02	2	rst2	transcription factor Rst2		ADR1,TDA9		viable	published
SPBC14F5.10c	2		ubiquitin-protein ligase E3, unknown biological role, implicated in protein catabolic process (predicted)			LONRF3,LONRF2,LONRF1	viable	conserved unknown
SPBC1105.05	2	exg1	cell wall glucan 1,6-beta-glucosidase Exg1		EXG2,EXG1,SPR1		viable	published
SPAC890.03	2	ppk16	serine/threonine protein kinase Ppk16 (predicted)	mug92	YPL150W		viable	published
SPBC14C8.15	2		triglyceride lipase-cholesterol esterase (predicted)		TGL1	LIPJ,LIPK,LIPM,LIPA,LIPF	viable	biological role inferred
SPBC1105.14	2	rsv2	transcription factor Rsv2		RPN4		viable	published
SPBC1198.14c	2
SPAPB2B4.07	2		ubiquitin family protein, human UBTD1 homolog			UBTD2,UBTD1	viable	conserved unknown
SPBC16C6.01c	2		lysine methyltransferase, human SETD6 ortholog (predicted)	SPBC543.11c	RKM4	SETD6	viable	conserved unknown
SPAC823.09c	2
1	2
SPBC21C3.14c	2
SPBC16E9.16c	2	lsd90	Lsd90 protein				viable	published
SPCC63.06	2		WD repeat protein, human WDR89 family		YNL035C	WDR89	viable	conserved unknown
SPCC63.03	2
SPCC613.03	2		endoplasmic reticulum EF hand protein (predicted)		SSP120	NUCB1,NUCB2	viable	conserved unknown
SPCC4G3.12c	2		ubiquitin-protein ligase E3 (predicted)			RNF148,RNF165	viable	conserved unknown
SPCC4B3.03c	2	mam301	multi-pass membrane and CBS domain protein, implicated in magnesium homeostasis and endomembrane organization (predicted)	mam3	MAM3	CNNM4	viable	conserved unknown
SPCC338.04	2	cid2	mitochondrial eukaryotic conserved protein Cid2		MIX23	CCDC58	viable	conserved unknown
SPCC320.03	2		transcription factor (predicted)		EDS1,RGT1		viable	biological role inferred
SPCC16A11.08	2	atg20	autophagy associated PX/BAR domain sorting nexin Atg20		ATG20		viable	published
SPCC1494.08c	2		cortical variant C2 domain protein, human FAM102A and FAM102B ortholog, implicated in signalling or endocytosis		YBL086C	FAM102B,FAM102A	viable	conserved unknown
SPBC947.05c	2	frp2	ferric-chelate reductase Frp2 (predicted)		AIM14,FRE2,FRE6,FRE8,FRE1,FRE4,FRE7,FRE3,FRE5	CYBB,NOX1,NOX3,NOX4	viable	biological role inferred
SPBC685.04c	2	aps2	AP-2 adaptor complex sigma subunit Aps2 (predicted)		APS2	AP2S1	viable	biological role inferred
SPBC428.15	2
SPBC428.08c	2
SPBC365.12c	2	ish1	nuclear envelope LEA domain protein Ish1		MSC1	TMEM205	viable	conserved unknown
SPBC32F12.03c	2	gpx1	glutathione peroxidase Gpx1		GPX2,HYR1,GPX1	GPX7	viable	published
SPBC2G2.06c	2
SPBC2D10.03c	2	ess1	DUF866 family protein, human C1orf123 ortholog		YCR090C	CZIB	viable	conserved unknown
SPBC21C3.08c	2	car2	ornithine transaminase Car2		CAR2	OAT	viable	published
SPBC21.03c	2		EVE domain (PUA-related) protein, implicated in tRNA metabolism (possible RNA binding domain associated with tRNA methyltransferases)			THYN1	viable	conserved unknown
SPBC18H10.02	2	lcf1	long-chain-fatty-acid-CoA ligase Lcf1		FAA3,FAA4,FAA1	ACSL3,ACSL4	viable	published
SPBC1861.02	2	abp2	unknown protein, may bind replication origins Abp2				viable	conserved unknown
SPBC1778.07	2
SPBC16H5.14c	2		short chain dehydrogenase DHRS3 family, implicated in lipid (isoprenoid) metabolism	SPBC21H7.08	YDL114W,TDA5	DHRS3	unknown	conserved unknown
SPBC16E9.13	2	ksp1	serine/threonine protein kinase Ksp1 (predicted)	ppk20	KSP1		viable	biological role inferred
SPAC694.04c	2		nuclear/mitochondrial metal-dependent protein hydrolase, human MYG1 ortholog		YER156C	MYG1	viable	conserved unknown
SPACUNK4.16c	2	tps3	alpha,alpha-trehalose-phosphate synthase (predicted)		TSL1,TPS3		viable	biological role inferred
SPAC16.01	2	rho2	Rho family GTPase Rho2		RHO2	RHOA,RHOB,RHOC	viable	published
SPAC3A11.11c	2
SPAC1B9.02c	2	sck1	serine/threonine protein kinase Sck1		SCH9	SGK1,SGK3,SGK2,AKT1,AKT2	viable	published
SPAC32A11.03c	2	phx1	stationary phase-specific homeobox transcription factor Phx1				viable	published
720	2
SPAC26F1.10c	2	pyp1	tyrosine phosphatase Pyp1		PTP3,PTP2	PTPN1,PTPN2	viable	published
SPAC25B8.08	2
7506	2
SPAC23G3.05c	2		conserved endomembrane protein, regulator of G-protein signaling (RGS) domain, implicated in signal transduction (predicted)		RAX1	AKAP10	viable	conserved unknown
SPAC10F6.14c	2		mitochondrial ABC1 kinase family protein, human ADCK5 ortholog, unknown role (predicted)			ADCK5	viable	conserved unknown
917	2
993	2
SPAC105.02c	2		ankyrin repeat protein, protein phosphatase regulatory subunit, human PPP1R16A ortholog		YGL242C	PPP1R16A	viable	conserved unknown
SPAC23C11.08	2	php3	CCAAT-binding factor complex subunit Php3		HAP3	NFYB	viable	published
SPAC1D4.03c	2	aut12	autophagy associated protein Aut12 (predicted)		MON1	MON1B,MON1A	viable	biological role inferred
SPAC1F3.09	2
SPAC22A12.14c	2
SPAC22A12.06c	2	fsh2	serine hydrolase-like, human TSTD2 and OVCA2 ortholog, unknown biological role, implicated in co-factor metabolism		FSH2	OVCA2,TSTD2	viable	conserved unknown
SPAC20H4.03c	2	tfs1	general transcription elongation factor TFIIS		DST1	TCEA1,TCEA2,TCEA3,TCEANC	viable	published
SPAC1687.15	2	gsk3	serine/threonine protein kinase Gsk3	skp1	MRK1,RIM11,MCK1	GSK3A,GSK3B	viable	published
5296	2
SPAC694.02	2		DEAD/DEAH box helicase, human DDL60 and DDL60L ortholog, implicated in mRNA degradation			DDX60,DDX60L	viable	conserved unknown
SPAC3H1.08c	2		mitochondrial calcium uniporter regulator (predicted)		FMP32	MCUR1,CCDC90B	viable	biological role inferred
SPAC652.01	2		BC10 family small membrane protein, unknown biological role, human BLCAP ortholog			BLCAP	viable	conserved unknown
SPAC17A5.16	2	ftp105	Golgi localized protein, human HID1 ortholog 3, implicated in vesicle-mediated transport		ECM30	HID1	viable	conserved unknown
1119	2
SPAC1834.04	2	hht1	histone H3 h3.1		HHT1,HHT2	H3-3A	viable	published
SPAC1834.09	2
SPAC3G9.11c	2	pdc201	pyruvate decarboxylase (predicted)		THI3,PDC6,PDC1,PDC5		viable	biological role inferred
SPAC3H8.03	2	img2	mitochondrial ribosomal protein subunit Mrpl49/Img2 (predicted)		IMG2	MRPL49	viable	biological role inferred
SPAC3H5.08c	2		WD repeat protein, human WDR44 family		DGR2,YMR102C	WDR44	viable	conserved unknown
SPAC4G9.14	2
318	2
SPAC18B11.04	2	ncs1	neuronal calcium sensor related protein Ncs1		FRQ1	NCS1	viable	published
3461	2
4302	2
SPAC1A6.04c	2	plb1	phospholipase B homolog Plb1		PLB2,PLB1,PLB3	PLA2G4E,PLA2G4F,PLA2G4D,PLA2G4A,PLA2G4B,PLA2G4C	viable	published
SPAC13F5.03c	2	gld1	mitochondrial glycerol dehydrogenase Gld1				viable	published
SPAC20G4.05c	2		mitochondrial protein, UPF0061 family, human SELENOO ortholog		FMP40	SELENOO	viable	conserved unknown
SPAC13F5.04c	3	vta1	Vps20 associated protein Vta1 (predicted)	vts1,new6,SPAC13F5.08	VTA1	VTA1	viable	biological role inferred
SPBC660.10	3	mef2	mitochondrial translation elongation factor G Mef2 (predicted)		MEF2	GFM2	viable	biological role inferred
SPBC4F6.08c	3	mrpl39	mitochondrial ribosomal protein subunit L39 (predicted)		MRPL39	MRPL33	viable	biological role inferred
SPBC691.03c	3	apl3	AP-2 adaptor complex alpha subunit Alp3		APL3	AP2A1,AP2A2	viable	published
SPBC725.11c	3	php2	CCAAT-binding factor complex subunit Php2		HAP2	NFYA	depends_on_conditions	published
SPAC11E3.12	3		mitochondrial thioredoxin family protein, implicated in sulfur cluster assembly			NDUFV2	viable	conserved unknown
SPAC140.01	3	sdh2	succinate dehydrogenase (ubiquinone) iron-sulfur protein subunit (predicted)		SDH2	SDHB	viable	biological role inferred
SPAC1556.02c	3	sdh1	succinate dehydrogenase Sdh1 (predicted)		YJL045W,SDH1	SDHA	viable	biological role inferred
SPBC776.01	3
SPAC683.02c	3		zf-CCHC type zinc finger protein, human ZCCHC9 ortholog, implicated in mRNA splicing (predicted)	SPAC694.01c		ZCCHC9	viable	conserved unknown
SPBP8B7.31	3		HAD superfamily hydrolase, unknown role		YER134C	MDP1	viable	conserved unknown
SPCC794.03	3		amino acid transmembrane transporter (predicted)		UGA4,HNM1,TPO5		viable	biological role inferred
SPCC736.13	3
SPCC663.06c	3
1234	3
189	3
SPCC5E4.10c	3		human leukocyte receptor 1 ortholog			LENG1	viable	conserved unknown
236	3
SPCC4G3.17	3	hdd1	GMP 5'-nucleotidase (predicted)		YBR242W,YGK1	HDDC2	viable	biological role inferred
SPCC4G3.09c	3	gyp3	GTPase activating protein Gyp3 (predicted)		MSB3,MSB4	GRTP1	viable	biological role inferred
SPCC4B3.12	3	set9	histone lysine H4-K20 methyltransferase Set9			KMT5B,KMT5C	viable	published
SPCC320.07c	3	mde7	RNA-binding protein Mde7		WHI4,WHI3	RBPMS	viable	conserved unknown
SPCC24B10.18	3		DUF2462 family protein, human Leydig cell tumor 10 kDa protein homolog		YLR363W-A	C19orf53	viable	conserved unknown
SPCC18B5.03	3	wee1	M phase inhibitor protein kinase Wee1		SWE1	WEE1,WEE2,PKMYT1	viable	published
5916	3
SPCC1393.13	3		metal-dependent phosphatase involved in cellular detoxification/metabolite repair	prl64	YMR027W	ARMT1	viable	biological role inferred
SPAC1071.09c	3		nucleolar DNAJ domain protein, DNAJC9 family, implicated in mRNA splicing (predicted)			DNAJC9	viable	conserved unknown
SPCC1020.08	3
SPBC9B6.03	3		zf-FYVE type zinc finger protein, involved in endosomal transport		PIB2	ZFYVE16,ZFYVE9	viable	biological role inferred
SPCC162.12	3	tco89	TORC1 subunit Tco89	SPCC1753.06c	TCO89		viable	published
SPBC28F2.03	3	ppi1	cyclophilin family peptidyl-prolyl cis-trans isomerase Cyp2	cyp2	CPR1	PPIA,PPIF	viable	published
SPAC17A2.02c	3		ER protein, DUF887 family protein, implicated in lipid metabolism		TDA4,YPR114W	TLCD4	viable	conserved unknown
SPBC119.16c	3		DENN domain-like containing protein, implicated in vesicle formation/trafficking		ANR2	DENND11	viable	conserved unknown
SPAC3G6.05	3
SPAC3H1.11	3
SPAPB24D3.08c	3
SPAPB1E7.11c	3	mpa1	mitochondrial translational activator, Mpa1				viable	published
SPAP27G11.12	3
SPACUNK4.17	3
SPCC965.12	3	dpe2	dipeptidyl peptidase, unknown specificity, implicated in glutathione metabolism (predicted)	ppp16		DPEP2,DPEP3,DPEP1	viable	conserved unknown
SPAC977.15	3
SPAC823.16c	3	atg1802	autophagy associated WD repeat protein Atg18b	mug179,atg18b,atg18	ATG18	WIPI1,WIPI2	viable	published
SPAC821.07c	3	moc3	transcription factor Moc3				viable	published
SPAC4H3.04c	3		MEMO1 family, human MEMO1 ortholog, ancient conserved protein, in some organisms this domain is present with ammecr1 which interacts with mediator complex and is implicated in transcription, implicated in signalling and localization to the plasma membrane		MHO1	MEMO1	viable	conserved unknown
SPAC806.07	3	ndk1	nucleoside diphosphate kinase Ndk1		YNK1	NME2P1,NME2,NME3,NME4	viable	published
SPAC806.04c	3
SPAC4H3.07c	3	rdl2	mitochondrial thiosulfate sulfurtransferase/rhodanese-like domain Rdl2 (predicted)	fmp31	RDL1,RDL2	TSTD1	viable	biological role inferred
SPAC6F6.13c	3
SPAC589.07c	3	atg1801	autophagy associated WD repeat protein Atg18a	atg18a,atg18	ATG18	WIPI1,WIPI2	viable	published
SPBC1198.07c	3
SPAC3A11.10c	3	dpe1	dipeptidyl peptidase, unknown specificity, implicated in glutathione metabolism (predicted)	ppp44		DPEP2,DPEP3,DPEP1	viable	conserved unknown
SPAC2F3.18c	3
SPBC16A3.08c	3	oga1	Stm1 homolog Oga1		STM1		viable	published
SPBC32H8.03	3	bem46	esterase/lipase, human ABHD13 ortholog (predicted)		YNL320W	ABHD13	viable	conserved unknown
SPBC31E1.01c	3	atg2	autophagy associated protein Atg2	mug36,SPBC660.18c	ATG2	ATG2B,ATG2A	viable	published
SPBC30D10.13c	3	pdb1	pyruvate dehydrogenase e1 component beta subunit Pdb1	agg1	PDB1	PDHB	viable	published
SPAC19B12.07c	3		zinc finger C2H2-type, human ZNF277 ortholog, implicated in transcriptional regulation			ZNF277	viable	conserved unknown
SPBC25B2.04c	3	mtg1	mitochondrial translation factor (GTPase) Mtg1 (predicted)		MTG1	MTG1	viable	biological role inferred
SPBC21C3.03	3		mitochondrial membrane ABC1 kinase family protein, unknown role, human ADCK2 ortholog		MCO76	ADCK2	viable	conserved unknown
SPBC215.06c	3
SPAC1F8.06	3	pfl8	cell surface glycoprotein, flocculin Pfl8	fta5			viable	published
SPAC1705.02	3		SERF family protein, DUF, human 4F5S homolog, implicated in mRNA splicing		YDL085C-A	SERF1A	viable	conserved unknown
SPBC19C7.01	3
SPAC22E12.14c	3	sck2	serine/threonine protein kinase S6K Sck2		SCH9	SGK1,SGK3,SGK2,AKT1,AKT2	viable	published
SPAC22F3.04	3
SPAC23A1.06c	3	cmk2	MAPK-activated protein kinase Cmk2	mkp2	RCK1,RCK2		viable	published
SPBC1709.09	3	rrf1	mitochondrial translation termination factor Rrf1		RRF1	MRRF	viable	published
SPBC16H5.13	3	wdr7	WD repeat protein, human WDR7 ortholog			WDR7,WDR72	viable	conserved unknown
SPAC23C4.09c	3		DNA-binding TFAR19-related protein, human Programmed cell death protein 5 ortholog (predicted)		SDD2	PDCD5	viable	conserved unknown
SPAC23D3.03c	3		GTPase activating protein (predicted)			TBC1D12,TBC1D14	viable	biological role inferred
SPBC16D10.08c	3	hsp104	heat shock protein, disaggregase Hsp104		HSP104	CLPB	viable	published
SPBC18H10.05	3		WD repeat protein, human WDR44 family		DGR2,YMR102C	WDR44	viable	conserved unknown
SPCP31B10.02	3		mitochondrial oxidoreductase-like protein, human OXLD1 ortholog		DPC25	OXLD1	viable	conserved unknown
