# Supplementary material for: Functional profiling of long intergenic non-coding RNAs in fission yeast
Source: eLife. 2022 Jan 5;11:e76000. doi: 10.7554/eLife.76000 (PMC8730722; doi:10.7554/eLife.76000)
Supplement: Supplementary file 6. [file elife-76000-supp6.xlsx]

## Sheet: Overview
Supplementary file 6: Phenotype data of lincRNA overexpression mutants
Sheets included in this dataset
growth_benign	Differential fitness analysis in benign conditions based on colony sizes, comparing mutants to wild type in the same condition
growth_stresses	Differential fitness analysis in stress conditions based on colony sizes, comparing mutants in stressed versus unstressed conditions
hits_table	table of hits denoted as "FAST" / "SLOW" growing in a given conditon
Explanation of column names
mean_effect_size	mean fitness divided by mean of control
mean_effect_size_log2	log2 of mean_effect_size
mean_fitness	mean of non-NA observations for this condition-strain pair (before normalising to control)
mean_fitness_log2	log2 of mean_fitness
median_effect_size	median fitness divided by median of control
median_effect_size_log2	log2 of median_effect_size
median_fitness	median of non-NA observations for this condition-strain pair (before normalising to control)
median_fitness_log2	log2 of median_fitness
observation_count	number of non-NA observations
p_Welch	p-value obtained by Welch's t-test, which does not assume homogeneity of variances
p_Welch_BH	p-value after FDR correction by the Benjamini-Hochberg method
p_Welch_BH_-log10	-log10 of p_Welch_BH
stdev_fitness	standard deviation of non-NA observations for this condition-strain pair (before normalising to control)

## Sheet: growth_benign
condition_timepoint	strain_id	mean_effect_size	mean_effect_size_log2	mean_fitness	mean_fitness_log2	median_effect_size	median_effect_size_log2	median_fitness	median_fitness_log2	observation_count	p_Welch	p_Welch_BH	p_Welch_BH_-log10	stdev_fitness	is_hit
EMM_NH4Cl	SPNCRNA.103	1.05765	0.0808587	1.06126	0.0857803	1.02726	0.0388056	1.02726	0.0388056	211	9.18421e-06	5.71231e-05	4.24319	0.180951	FALSE
EMM_NH4Cl	SPNCRNA.1039	0.963766	-0.0532454	0.967059	-0.0483238	0.984501	-0.0225354	0.984501	-0.0225354	124	0.0398376	0.12552	0.901286	0.192626	FALSE
EMM_NH4Cl	SPNCRNA.1064	1.04224	0.0596858	1.0458	0.0646074	1.05669	0.0795493	1.05669	0.0795493	123	0.00283072	0.00768339	2.11445	0.151526	TRUE
EMM_NH4Cl	SPNCRNA.1073	1.0245	0.0349174	1.028	0.039839	1.03125	0.0443914	1.03125	0.0443914	124	0.080377	0.12552	0.901286	0.15239	FALSE
EMM_NH4Cl	SPNCRNA.1088	1.03933	0.0556594	1.04289	0.060581	1.02014	0.0287666	1.02014	0.0287666	124	0.00261465	0.00727001	2.13846	0.140082	FALSE
EMM_NH4Cl	SPNCRNA.1097	1.01657	0.0237047	1.02004	0.0286263	1.02434	0.0346978	1.02434	0.0346978	251	0.18758	0.260781	0.583723	0.194664	FALSE
EMM_NH4Cl	SPNCRNA.1125	1.00047	0.000676965	1.00389	0.00559855	0.971922	-0.0410876	0.971922	-0.0410876	127	0.976993	0.985639	0.00628219	0.181124	FALSE
EMM_NH4Cl	SPNCRNA.1130	1.06047	0.0846993	1.06409	0.0896209	1.03564	0.0505192	1.03564	0.0505192	123	2.40129e-05	0.000105287	3.97762	0.150669	FALSE
EMM_NH4Cl	SPNCRNA.115	0.98845	-0.0167604	0.991827	-0.0118389	0.993895	-0.00883418	0.993895	-0.00883418	211	0.340544	0.417441	0.379405	0.171809	FALSE
EMM_NH4Cl	SPNCRNA.1154	1.0444	0.0626757	1.04797	0.0675972	1.01444	0.0206787	1.01444	0.0206787	128	0.0127892	0.0255783	1.59213	0.197359	FALSE
EMM_NH4Cl	SPNCRNA.1165	1.12009	0.16362	1.12392	0.168541	1.11824	0.161225	1.11824	0.161225	128	4.70387e-19	1.07248e-16	15.9696	0.1281	TRUE
EMM_NH4Cl	SPNCRNA.1166	1.03496	0.0495732	1.0385	0.0544948	1.04082	0.0577255	1.04082	0.0577255	125	0.0110291	0.0241792	1.61656	0.149102	FALSE
EMM_NH4Cl	SPNCRNA.12	1.01761	0.0251791	1.02108	0.0301007	1.03464	0.0491332	1.03464	0.0491332	124	0.324001	0.405296	0.392228	0.196386	FALSE
EMM_NH4Cl	SPNCRNA.1249	1.06558	0.0916417	1.06922	0.0965633	1.03436	0.0487357	1.03436	0.0487357	128	2.56984e-06	1.76816e-05	4.75248	0.148594	FALSE
EMM_NH4Cl	SPNCRNA.1255	1.03273	0.0464621	1.03626	0.0513837	1.02178	0.0310914	1.02178	0.0310914	128	0.0086237	0.0227029	1.64392	0.136046	FALSE
EMM_NH4Cl	SPNCRNA.130	1.0605	0.0847503	1.06413	0.0896719	1.06327	0.0885036	1.06327	0.0885036	123	1.01117e-07	8.86719e-07	6.05221	0.115983	TRUE
EMM_NH4Cl	SPNCRNA.1306	0.981634	-0.0267436	0.984988	-0.021822	1.00773	0.0111137	1.00773	0.0111137	118	0.377408	0.668934	0.174617	0.224036	FALSE
EMM_NH4Cl	SPNCRNA.1326	1.00984	0.0141197	1.01329	0.0190413	1.03388	0.0480633	1.03388	0.0480633	82	0.644216	0.720115	0.142598	0.191236	FALSE
EMM_NH4Cl	SPNCRNA.1341	1.05677	0.0796568	1.06038	0.0845784	1.04934	0.0694821	1.04934	0.0694821	115	9.49282e-05	0.000349091	3.45706	0.148524	FALSE
EMM_NH4Cl	SPNCRNA.1343	0.996306	-0.0053396	0.99971	-0.000418025	0.959372	-0.0598381	0.959372	-0.0598381	128	0.793928	0.845867	0.0726981	0.157272	FALSE
EMM_NH4Cl	SPNCRNA.1348	1.0511	0.0719061	1.0547	0.0768277	1.05872	0.0823173	1.05872	0.0823173	124	0.000973024	0.00299797	2.52317	0.166501	TRUE
EMM_NH4Cl	SPNCRNA.1361	0.989249	-0.015595	0.992629	-0.0106734	1.00179	0.00258552	1.00179	0.00258552	124	0.453519	0.794874	0.0997017	0.156913	FALSE
EMM_NH4Cl	SPNCRNA.137	1.05884	0.0824809	1.06246	0.0874025	1.06453	0.0902216	1.06453	0.0902216	124	8.83293e-06	4.57706e-05	4.33941	0.13903	TRUE
EMM_NH4Cl	SPNCRNA.1415	1.03378	0.0479291	1.03731	0.0528507	1.01717	0.024562	1.01717	0.024562	124	0.0052743	0.0133615	1.87414	0.129649	FALSE
EMM_NH4Cl	SPNCRNA.1425	0.907858	-0.139462	0.91096	-0.13454	0.945387	-0.0810233	0.945387	-0.0810233	211	7.69885e-08	8.74276e-07	6.05835	0.238286	TRUE
EMM_NH4Cl	SPNCRNA.144	1.04921	0.0692979	1.05279	0.0742195	1.02819	0.0401056	1.02819	0.0401056	83	0.0269683	0.0828282	1.08182	0.198281	FALSE
EMM_NH4Cl	SPNCRNA.1443	1.06086	0.0852401	1.06449	0.0901616	1.04878	0.0687167	1.04878	0.0687167	124	2.42329e-07	2.90401e-06	5.537	0.121483	FALSE
EMM_NH4Cl	SPNCRNA.145	1.0638	0.0892321	1.06744	0.0941537	1.06665	0.0930839	1.06665	0.0930839	122	4.92801e-06	4.88516e-05	4.31112	0.145351	TRUE
EMM_NH4Cl	SPNCRNA.1460	1.04944	0.0696144	1.05302	0.074536	1.04002	0.0566094	1.04002	0.0566094	124	5.99308e-05	0.000227737	3.64257	0.129884	FALSE
EMM_NH4Cl	SPNCRNA.1519	0.969622	-0.0445052	0.972936	-0.0395837	0.959452	-0.059717	0.959452	-0.059717	212	0.0228665	0.0420449	1.37629	0.189644	FALSE
EMM_NH4Cl	SPNCRNA.1530	1.05162	0.0726196	1.05522	0.0775412	0.994291	-0.00825938	0.994291	-0.00825938	127	0.00706216	0.0167726	1.7754	0.211093	FALSE
EMM_NH4Cl	SPNCRNA.1559	1.00922	0.0132388	1.01267	0.0181604	0.998589	-0.00203681	0.998589	-0.00203681	124	0.602936	0.687347	0.162824	0.195205	FALSE
EMM_NH4Cl	SPNCRNA.1562	1.00173	0.00249324	1.00515	0.00741482	1.02254	0.0321626	1.02254	0.0321626	126	0.930432	0.950001	0.022276	0.220631	FALSE
EMM_NH4Cl	SPNCRNA.159	1.04639	0.0654152	1.04996	0.0703367	1.01883	0.0269113	1.01883	0.0269113	167	0.000147248	0.000987428	3.00549	0.151148	FALSE
EMM_NH4Cl	SPNCRNA.1624	1.03993	0.0564834	1.04348	0.061405	1.03122	0.0443465	1.03122	0.0443465	128	0.0032014	0.00973886	2.01149	0.147928	FALSE
EMM_NH4Cl	SPNCRNA.1642	1.04317	0.0609699	1.04673	0.0658915	1.04866	0.0685458	1.04866	0.0685458	111	0.0264758	0.0464345	1.33316	0.200956	FALSE
EMM_NH4Cl	SPNCRNA.1670	1.02398	0.0341857	1.02748	0.0391072	1.05173	0.0727685	1.05173	0.0727685	128	0.136614	0.19714	0.705226	0.179172	FALSE
EMM_NH4Cl	SPNCRNA.1696	1.02659	0.0378619	1.0301	0.0427835	1.01021	0.0146572	1.01021	0.0146572	212	0.0119818	0.0307313	1.51242	0.148272	FALSE
EMM_NH4Cl	SPNCRNA.175	1.08337	0.115527	1.08707	0.120449	1.09938	0.136688	1.09938	0.136688	121	2.36913e-07	2.90401e-06	5.537	0.165833	TRUE
EMM_NH4Cl	SPNCRNA.177	1.0048	0.00690631	1.00823	0.0118279	0.985882	-0.0205135	0.985882	-0.0205135	83	0.747339	0.853596	0.0687475	0.133469	FALSE
EMM_NH4Cl	SPNCRNA.187	1.04517	0.0637357	1.04874	0.0686572	1.0605	0.0847457	1.0605	0.0847457	119	0.012376	0.025194	1.5987	0.192507	FALSE
EMM_NH4Cl	SPNCRNA.188	1.01362	0.0195103	1.01708	0.0244319	0.999852	-0.000213931	0.999852	-0.000213931	84	0.497123	0.791269	0.101676	0.181928	FALSE
EMM_NH4Cl	SPNCRNA.189	1.04949	0.0696917	1.05308	0.0746132	1.04388	0.0619557	1.04388	0.0619557	83	0.00793954	0.0188363	1.72501	0.164594	FALSE
EMM_NH4Cl	SPNCRNA.190	1.04012	0.0567436	1.04367	0.0616652	1.0374	0.0529677	1.0374	0.0529677	126	0.00771685	0.0250442	1.60129	0.164227	FALSE
EMM_NH4Cl	SPNCRNA.194	1.03998	0.0565502	1.04353	0.0614717	1.01077	0.0154527	1.01077	0.0154527	84	0.0116633	0.0422102	1.37458	0.140544	FALSE
EMM_NH4Cl	SPNCRNA.236	1.0985	0.13553	1.10225	0.140451	1.11191	0.153044	1.11191	0.153044	122	2.41477e-13	6.8821e-12	11.1623	0.130735	TRUE
EMM_NH4Cl	SPNCRNA.239	0.953842	-0.0681783	0.957101	-0.0632567	1.0416	0.0587988	1.0416	0.0587988	123	0.116423	0.305109	0.515544	0.323505	FALSE
EMM_NH4Cl	SPNCRNA.242	1.0301	0.0427885	1.03362	0.0477101	1.04526	0.0638558	1.04526	0.0638558	248	0.006468	0.0156883	1.80442	0.168024	FALSE
EMM_NH4Cl	SPNCRNA.248	1.02091	0.0298528	1.0244	0.0347743	1.01977	0.0282438	1.01977	0.0282438	124	0.131737	0.192538	0.715483	0.151045	FALSE
EMM_NH4Cl	SPNCRNA.256	1.06946	0.0968767	1.07311	0.101798	1.06409	0.0896142	1.06409	0.0896142	124	3.01567e-07	2.34387e-06	5.63007	0.140684	TRUE
EMM_NH4Cl	SPNCRNA.26	1.04784	0.0674143	1.05142	0.0723359	1.05505	0.0773093	1.05505	0.0773093	212	8.48289e-06	4.57706e-05	4.33941	0.148424	TRUE
EMM_NH4Cl	SPNCRNA.282	1.08255	0.114428	1.08625	0.11935	1.03891	0.0550672	1.03891	0.0550672	84	9.47247e-05	0.000654462	3.18412	0.183666	FALSE
EMM_NH4Cl	SPNCRNA.284	1.01613	0.0230914	1.01961	0.028013	1.01264	0.01812	1.01264	0.01812	123	0.21753	0.295219	0.529856	0.141759	FALSE
EMM_NH4Cl	SPNCRNA.289	1.06066	0.0849612	1.06428	0.0898828	1.01995	0.0285021	1.01995	0.0285021	83	0.00661327	0.0256765	1.59046	0.197603	FALSE
EMM_NH4Cl	SPNCRNA.30	1.06142	0.0860008	1.06505	0.0909224	1.06213	0.0869645	1.06213	0.0869645	124	3.08404e-07	2.34387e-06	5.63007	0.123903	TRUE
EMM_NH4Cl	SPNCRNA.31	1.01502	0.0215013	1.01848	0.0264229	1.03323	0.0471606	1.03323	0.0471606	84	0.223259	0.535616	0.271146	0.109832	FALSE
EMM_NH4Cl	SPNCRNA.335	1.00419	0.00602898	1.00762	0.0109506	0.957614	-0.0624836	0.957614	-0.0624836	211	0.747119	0.853596	0.0687475	0.184917	FALSE
EMM_NH4Cl	SPNCRNA.348	1.01295	0.0185591	1.01641	0.0234807	1.00171	0.00247018	1.00171	0.00247018	212	0.284168	0.535616	0.271146	0.171726	FALSE
EMM_NH4Cl	SPNCRNA.352	1.01815	0.025956	1.02163	0.0308776	1.01685	0.0241056	1.01685	0.0241056	212	0.15625	0.246371	0.608411	0.18223	FALSE
EMM_NH4Cl	SPNCRNA.37	1.04711	0.0664168	1.05069	0.0713383	1.05731	0.0804036	1.05731	0.0804036	205	4.73678e-05	0.000186204	3.73001	0.158505	TRUE
EMM_NH4Cl	SPNCRNA.377	1.02188	0.0312268	1.02537	0.0361484	1.035	0.04963	1.035	0.04963	124	0.095659	0.147367	0.831601	0.142526	FALSE
EMM_NH4Cl	SPNCRNA.382	1.11864	0.161746	1.12246	0.166667	1.10649	0.145997	1.10649	0.145997	124	1.01338e-16	1.15525e-14	13.9373	0.136187	TRUE
EMM_NH4Cl	SPNCRNA.383	0.97365	-0.0385242	0.976978	-0.0336026	0.951545	-0.0716564	0.951545	-0.0716564	212	0.0143297	0.0276879	1.55771	0.150974	FALSE
EMM_NH4Cl	SPNCRNA.388	1.09287	0.12812	1.0966	0.133041	1.09467	0.130498	1.09467	0.130498	123	9.18726e-12	2.60368e-10	9.58441	0.135054	TRUE
EMM_NH4Cl	SPNCRNA.389	1.07196	0.100257	1.07563	0.105179	1.07019	0.0978706	1.07019	0.0978706	124	4.50708e-07	2.90401e-06	5.537	0.148455	TRUE
EMM_NH4Cl	SPNCRNA.394	1.07122	0.0992549	1.07488	0.104176	1.05705	0.0800468	1.05705	0.0800468	121	1.26315e-05	5.75995e-05	4.23958	0.170389	TRUE
EMM_NH4Cl	SPNCRNA.399	1.02582	0.0367722	1.02932	0.0416937	1.02659	0.0378543	1.02659	0.0378543	206	0.0452625	0.0770138	1.11343	0.180503	FALSE
EMM_NH4Cl	SPNCRNA.400	1.0202	0.028849	1.02368	0.0337706	1.02828	0.0402283	1.02828	0.0402283	123	0.140175	0.199749	0.699515	0.148437	FALSE
EMM_NH4Cl	SPNCRNA.401	1.04498	0.0634736	1.04855	0.0683952	1.05809	0.0814564	1.05809	0.0814564	120	0.00199713	0.00569181	2.24475	0.15383	TRUE
EMM_NH4Cl	SPNCRNA.402	1.06237	0.0872921	1.066	0.0922137	1.08235	0.114171	1.08235	0.114171	84	0.00270598	0.0134123	1.8725	0.184039	FALSE
EMM_NH4Cl	SPNCRNA.410	0.994858	-0.00743788	0.998257	-0.0025163	0.968286	-0.0464945	0.968286	-0.0464945	212	0.687667	0.761108	0.118554	0.182411	FALSE
EMM_NH4Cl	SPNCRNA.412	1.0048	0.00691231	1.00824	0.0118339	0.997105	-0.00418314	0.997105	-0.00418314	127	0.729165	0.791665	0.101459	0.153517	FALSE
EMM_NH4Cl	SPNCRNA.414	0.998934	-0.00153929	1.00235	0.00338229	0.9812	-0.0273811	0.9812	-0.0273811	212	0.933334	0.950001	0.022276	0.181803	FALSE
EMM_NH4Cl	SPNCRNA.421	1.08364	0.115882	1.08734	0.120803	1.05819	0.0816023	1.05819	0.0816023	127	3.39982e-10	4.30644e-09	8.36588	0.136398	TRUE
EMM_NH4Cl	SPNCRNA.426	1.02434	0.0346976	1.02784	0.0396192	0.992741	-0.0105104	0.992741	-0.0105104	212	0.0669628	0.12053	0.918905	0.18913	FALSE
EMM_NH4Cl	SPNCRNA.427	0.977384	-0.0330027	0.980724	-0.0280812	0.997005	-0.00432803	0.997005	-0.00432803	127	0.135599	0.337813	0.471323	0.167569	FALSE
EMM_NH4Cl	SPNCRNA.452	1.10954	0.14996	1.11333	0.154881	1.09373	0.129262	1.09373	0.129262	128	4.31821e-13	9.84552e-12	11.0068	0.152147	TRUE
EMM_NH4Cl	SPNCRNA.46	1.06325	0.0884846	1.06689	0.0934062	1.0723	0.100706	1.0723	0.100706	124	4.47573e-07	2.90401e-06	5.537	0.129815	TRUE
EMM_NH4Cl	SPNCRNA.463	1.01339	0.0191888	1.01685	0.0241104	0.993946	-0.00876102	0.993946	-0.00876102	128	0.307435	0.393794	0.404731	0.145172	FALSE
EMM_NH4Cl	SPNCRNA.475	0.961174	-0.0571299	0.964459	-0.0522083	0.980828	-0.0279281	0.980828	-0.0279281	127	0.069416	0.15459	0.810818	0.237848	FALSE
EMM_NH4Cl	SPNCRNA.507	0.986719	-0.0192881	0.990091	-0.0143665	0.976585	-0.0341831	0.976585	-0.0341831	122	0.330274	0.720115	0.142598	0.147612	FALSE
EMM_NH4Cl	SPNCRNA.515	1.00753	0.010826	1.01098	0.0157476	1.00221	0.00318771	1.00221	0.00318771	124	0.52397	0.6158	0.21056	0.128222	FALSE
EMM_NH4Cl	SPNCRNA.524	1.06357	0.0889095	1.0672	0.0938311	1.00857	0.0123106	1.00857	0.0123106	84	0.00362428	0.0130005	1.88604	0.193827	FALSE
EMM_NH4Cl	SPNCRNA.538	1.06479	0.090563	1.06842	0.0954845	1.07507	0.104428	1.07507	0.104428	122	0.000965779	0.00299797	2.52317	0.210314	TRUE
EMM_NH4Cl	SPNCRNA.539	1.01144	0.0164048	1.01489	0.0213264	1.03045	0.0432678	1.03045	0.0432678	147	0.415925	0.50442	0.297208	0.167364	FALSE
EMM_NH4Cl	SPNCRNA.59	1.04188	0.0591948	1.04544	0.0641163	1.04063	0.0574506	1.04063	0.0574506	124	0.00105033	0.00315099	2.50155	0.136429	FALSE
EMM_NH4Cl	SPNCRNA.601	1.04975	0.0700503	1.05334	0.0749718	0.998756	-0.00179635	0.998756	-0.00179635	84	0.00962671	0.025194	1.5987	0.171007	FALSE
EMM_NH4Cl	SPNCRNA.628	1.04886	0.0688189	1.05244	0.0737405	1.02452	0.0349477	1.02452	0.0349477	84	0.0078402	0.0297928	1.52589	0.163187	FALSE
EMM_NH4Cl	SPNCRNA.650	1.11094	0.151774	1.11473	0.156696	1.12	0.163499	1.12	0.163499	124	2.26752e-12	3.69282e-11	10.4326	0.157256	TRUE
EMM_NH4Cl	SPNCRNA.7	0.991231	-0.0127074	0.994618	-0.00778582	0.960554	-0.058061	0.960554	-0.058061	128	0.571955	0.675861	0.170142	0.173014	FALSE
EMM_NH4Cl	SPNCRNA.720	1.08163	0.113209	1.08533	0.118131	1.05943	0.08329	1.05943	0.08329	84	2.2604e-05	0.000184061	3.73504	0.165699	TRUE
EMM_NH4Cl	SPNCRNA.737	1.03383	0.0480022	1.03737	0.0529238	1.01288	0.0184597	1.01288	0.0184597	83	0.0473563	0.09517	1.0215	0.151732	FALSE
EMM_NH4Cl	SPNCRNA.738	1.02105	0.0300548	1.02454	0.0349764	1.02181	0.0311305	1.02181	0.0311305	124	0.120695	0.178692	0.747895	0.147539	FALSE
EMM_NH4Cl	SPNCRNA.745	1.03568	0.0505832	1.03922	0.0555048	1.04296	0.0606789	1.04296	0.0606789	123	0.0244407	0.043535	1.36116	0.1718	FALSE
EMM_NH4Cl	SPNCRNA.767	0.978654	-0.0311293	0.981998	-0.0262077	0.981646	-0.0267247	0.981646	-0.0267247	84	0.213822	0.293684	0.53212	0.154779	FALSE
EMM_NH4Cl	SPNCRNA.780	1.01823	0.0260675	1.02171	0.0309891	1.03187	0.045255	1.03187	0.045255	84	0.225448	0.299414	0.523728	0.135096	FALSE
EMM_NH4Cl	SPNCRNA.781	1.15558	0.208615	1.15953	0.213537	1.14213	0.191725	1.14213	0.191725	84	1.25543e-13	4.77062e-12	11.3214	0.161014	TRUE
EMM_NH4Cl	SPNCRNA.784	1.07008	0.097717	1.07374	0.102639	1.06495	0.0907803	1.06495	0.0907803	84	0.000353099	0.00230019	2.63824	0.171443	TRUE
EMM_NH4Cl	SPNCRNA.79	1.04437	0.0626262	1.04793	0.0675477	1.0156	0.0223337	1.0156	0.0223337	84	0.0291258	0.09517	1.0215	0.18219	FALSE
EMM_NH4Cl	SPNCRNA.808	1.03066	0.0435671	1.03418	0.0484887	1.02213	0.0315836	1.02213	0.0315836	124	0.0122368	0.025194	1.5987	0.13149	FALSE
EMM_NH4Cl	SPNCRNA.819	1.07441	0.10355	1.07809	0.108471	1.07433	0.103431	1.07433	0.103431	82	1.35552e-05	0.00011225	3.94981	0.144365	TRUE
EMM_NH4Cl	SPNCRNA.86	1.01513	0.0216711	1.0186	0.0265927	0.992589	-0.0107323	0.992589	-0.0107323	82	0.320417	0.405296	0.392228	0.135396	FALSE
EMM_NH4Cl	SPNCRNA.87	1.00422	0.00607463	1.00765	0.0109962	1.01138	0.0163206	1.01138	0.0163206	84	0.759554	0.948934	0.0227639	0.123927	FALSE
EMM_NH4Cl	SPNCRNA.90	1.04347	0.0613832	1.04703	0.0663048	1.04434	0.0625931	1.04434	0.0625931	123	0.00109546	0.00320211	2.49456	0.141764	FALSE
EMM_NH4Cl	SPNCRNA.900	1.06202	0.086812	1.06565	0.0917336	1.0081	0.0116372	1.0081	0.0116372	82	0.00484862	0.019093	1.71913	0.193167	FALSE
EMM_NH4Cl	SPNCRNA.917	0.961022	-0.057358	0.964306	-0.0524364	0.976659	-0.0340739	0.976659	-0.0340739	84	0.105298	0.157948	0.801487	0.21754	FALSE
EMM_NH4Cl	SPNCRNA.93	0.982355	-0.0256831	0.985712	-0.0207615	1.0168	0.0240387	1.0168	0.0240387	83	0.315535	0.399677	0.39829	0.157847	FALSE
EMM_NH4Cl	SPNCRNA.934	1.06733	0.0940034	1.07098	0.098925	1.07007	0.0977101	1.07007	0.0977101	123	1.00609e-08	1.04267e-07	6.98185	0.119085	TRUE
EMM_NH4Cl	SPNCRNA.942	1.05925	0.0830491	1.06287	0.0879707	1.06011	0.0842196	1.06011	0.0842196	123	0.000131457	0.000468317	3.32946	0.164572	TRUE
EMM_NH4Cl	SPNCRNA.965	1.07397	0.10295	1.07764	0.107872	1.06199	0.0867749	1.06199	0.0867749	123	2.12877e-09	2.4268e-08	7.61497	0.124717	TRUE
EMM_NH4Cl	SPNCRNA.974	1.07713	0.107197	1.08081	0.112119	1.07635	0.106144	1.07635	0.106144	124	2.9862e-13	1.13476e-11	10.9451	0.102931	TRUE
EMM_NH4Cl	SPNCRNA.989	1.02723	0.0387526	1.03074	0.0436742	0.955357	-0.0658882	0.955357	-0.0658882	82	0.175444	0.2959	0.528855	0.179362	FALSE
EMM_NH4Cl	SPNCRNA.996	1.0265	0.0377333	1.03001	0.0426549	1.02056	0.0293572	1.02056	0.0293572	124	0.04038	0.0697473	1.15647	0.139827	FALSE
EMM_NH4Cl	evc	1	0	1.00342	0.00492158	1	0	1	0	3570	1	1	0	0.162149	FALSE

## Sheet: growth_stresses
strain_id	condition_timepoint	mean_effect_size	mean_effect_size_log2	mean_fitness	mean_fitness_log2	median_effect_size	median_effect_size_log2	median_fitness	median_fitness_log2	observation_count	p_Welch	p_Welch_BH	p_Welch_BH_-log10	stdev_fitness	is_hit
SPNCRNA.103	Ant0.1ng-40h	0.958229	-0.0615582	1.01693	0.0242222	0.991256	-0.0126705	1.01828	0.026135	36	0.00860345	0.0659585	1.18073	0.0661799	FALSE
SPNCRNA.103	Ant1ng-40h	0.927729	-0.108225	0.984563	-0.0224443	0.969875	-0.0441293	0.996317	-0.00532372	52	0.00173447	0.0254507	1.5943	0.146079	FALSE
SPNCRNA.103	Bleo20ug-40h	0.955335	-0.0659215	1.01386	0.0198588	0.993829	-0.00893088	1.02092	0.0298747	36	0.104096	0.191402	0.718055	0.154872	FALSE
SPNCRNA.103	Caff10mM-40h	0.946544	-0.079258	1.00453	0.00652228	0.995595	-0.00636938	1.02274	0.0324362	47	0.036457	0.115447	0.937617	0.161351	FALSE
SPNCRNA.103	Can60ug-40h	0.957489	-0.0626721	1.01615	0.0231082	0.986325	-0.0198655	1.01321	0.01894	56	0.0455917	0.099282	1.00313	0.138515	FALSE
SPNCRNA.103	CoCl0.25mM-40h	0.961106	-0.057232	1.01999	0.0285483	0.992056	-0.011507	1.0191	0.0272986	35	0.0681607	0.291945	0.534698	0.109273	FALSE
SPNCRNA.103	Diam2mM-40h	0.835903	-0.258592	0.887112	-0.172812	0.878141	-0.187475	0.902082	-0.14867	24	4.17145e-06	0.000118886	3.92487	0.141708	TRUE
SPNCRNA.103	EGTA10mM-40h	0.967022	-0.0483789	1.02626	0.0374014	1.02735	0.038934	1.05536	0.0777395	12	0.47992	0.641067	0.193096	0.160859	FALSE
SPNCRNA.103	EMM_Arg-40h	1.00413	0.00593984	1.06564	0.0917202	1.07229	0.100697	1.10153	0.139502	4	0.967315	0.987763	0.00534738	0.195776	FALSE
SPNCRNA.103	EMM_Cyst-40h	0.889062	-0.169645	0.943527	-0.0838642	0.923341	-0.115065	0.948514	-0.0762595	15	0.000947191	0.00719865	2.14275	0.10756	TRUE
SPNCRNA.103	EMM_Gal2-40h	0.886667	-0.173536	0.940986	-0.0877554	0.902063	-0.1487	0.926656	-0.109894	36	1.78904e-07	1.36241e-05	4.86569	0.101561	TRUE
SPNCRNA.103	EMM_Glu-40h	1.00247	0.00355318	1.06388	0.0893335	1.01188	0.0170366	1.03947	0.0558422	60	0.91275	0.945941	0.0241358	0.157338	FALSE
SPNCRNA.103	EMM_Gluc2-40h	0.980214	-0.0288307	1.04026	0.0569497	0.980302	-0.0287018	1.00703	0.0101037	19	0.560762	0.800281	0.0967576	0.145275	FALSE
SPNCRNA.103	EMM_Gluc3-40h	1.00582	0.00837462	1.06744	0.0941549	1.04158	0.0587786	1.06998	0.0975841	31	0.840628	0.918482	0.0369296	0.155243	FALSE
SPNCRNA.103	EMM_Gly3-40h	0.78996	-0.340148	0.838355	-0.254367	0.856512	-0.223454	0.879863	-0.184649	16	0.000120201	0.00225649	2.64657	0.174462	TRUE
SPNCRNA.103	EMM_NH4Cl-40h	1	0	1.06126	0.0857803	1	0	1.02726	0.0388056	211	1	1	0	0.180951	FALSE
SPNCRNA.103	EMM_Phe-40h	0.924596	-0.113104	0.981239	-0.0273242	0.900472	-0.151247	0.925021	-0.112442	40	0.00632003	0.0327492	1.4848	0.160467	FALSE
SPNCRNA.103	EMM_Pro-40h	0.969285	-0.0450077	1.02866	0.0407726	0.98817	-0.0171695	1.01511	0.0216361	28	0.340689	0.441347	0.35522	0.166031	FALSE
SPNCRNA.103	H2O2_0.5mM-40h	1.00558	0.00802569	1.06718	0.093806	1.00593	0.00852559	1.03335	0.0473312	40	0.764702	0.839556	0.0759504	0.0967293	FALSE
SPNCRNA.103	H2O2_1mM-40h	0.99429	-0.00826096	1.0552	0.0775194	0.992973	-0.0101738	1.02004	0.0286317	40	0.787342	0.908813	0.0415253	0.117635	FALSE
SPNCRNA.103	H2O2_3mM-40h	0.985197	-0.0215165	1.04555	0.0642639	1.01625	0.0232564	1.04396	0.062062	28	0.59939	0.713017	0.1469	0.142478	FALSE
SPNCRNA.103	HU10mM-40h	0.927744	-0.108201	0.984579	-0.0224209	0.929882	-0.10488	0.955234	-0.0660746	72	0.000414228	0.00181623	2.74083	0.145921	TRUE
SPNCRNA.103	HU20mM-40h	0.963577	-0.0535277	1.02261	0.0322526	1.0042	0.00604956	1.03158	0.0448551	64	0.0832442	0.153062	0.815133	0.146417	FALSE
SPNCRNA.103	HU5mM-40h	0.915247	-0.127766	0.971317	-0.0419859	0.941639	-0.0867542	0.967311	-0.0479487	72	1.18814e-07	4.51492e-06	5.34535	0.0915139	TRUE
SPNCRNA.103	MMS0.005-40h	0.956961	-0.0634674	1.01559	0.0223129	0.997993	-0.0028981	1.0252	0.0359075	72	0.00634958	0.080428	1.09459	0.0929427	FALSE
SPNCRNA.103	MMS0.0075-40h	0.968263	-0.0465287	1.02758	0.0392517	1.01469	0.0210396	1.04235	0.0598452	72	0.0684681	0.260179	0.584728	0.114724	FALSE
SPNCRNA.103	Rap100ng-40h	1.01016	0.0145776	1.07204	0.100358	1.05725	0.0803137	1.08607	0.119119	48	0.665672	0.824854	0.0836228	0.148992	FALSE
SPNCRNA.103	SDS0.001-40h	0.941379	-0.0871525	0.999049	-0.00137214	0.970138	-0.0437385	0.996587	-0.00493292	72	0.000325058	0.00256939	2.59017	0.098685	FALSE
SPNCRNA.103	SDS0.005-40h	0.910118	-0.135875	0.965873	-0.0500942	0.954001	-0.067937	0.98001	-0.0291314	64	2.16896e-08	1.23631e-06	5.90787	0.0857139	FALSE
SPNCRNA.103	Sorb1.2M-40h	0.831615	-0.266013	0.882561	-0.180233	0.979596	-0.0297413	1.0063	0.00906425	16	0.0269954	0.0932567	1.03032	0.28917	FALSE
SPNCRNA.103	TSA500nM-40h	0.907011	-0.140808	0.962576	-0.0550272	0.939228	-0.0904523	0.964834	-0.0516468	24	3.2564e-06	5.53587e-05	4.25681	0.0724838	TRUE
SPNCRNA.103	Temp32C-40h	1.03268	0.0463913	1.09594	0.132172	1.09032	0.124749	1.12004	0.163555	60	0.136873	0.446386	0.350289	0.151111	FALSE
SPNCRNA.103	Temp37C-40h	1.0561	0.078744	1.1208	0.164524	0.987218	-0.0185593	1.01413	0.0202463	44	0.0651603	0.11087	0.955187	0.193276	FALSE
SPNCRNA.103	Torin5uM-40h	0.905152	-0.143767	0.960603	-0.0579871	0.953766	-0.0682921	0.979769	-0.0294866	60	1.29207e-05	0.000711942	3.14756	0.141551	FALSE
SPNCRNA.103	VPA3mM-40h	0.897596	-0.155862	0.952584	-0.070082	0.922066	-0.117058	0.947204	-0.0782524	56	2.88273e-05	0.000410789	3.38638	0.159934	TRUE
SPNCRNA.103	VPA5mM-40h	0.906094	-0.142267	0.961603	-0.056487	1.01039	0.0149118	1.03794	0.0537173	47	0.00294943	0.00730946	2.13611	0.203717	FALSE
SPNCRNA.1039	Ant0.1ng-40h	0.974434	-0.0373634	0.942336	-0.0856873	0.950041	-0.0739388	0.935316	-0.0964742	36	0.447584	0.671376	0.173034	0.164086	FALSE
SPNCRNA.1039	Ant1ng-40h	0.973284	-0.039067	0.941223	-0.0873908	0.982355	-0.0256831	0.96713	-0.0482186	36	0.40973	0.569625	0.244411	0.155433	FALSE
SPNCRNA.1039	Bleo20ug-40h	1.00872	0.0125313	0.975496	-0.0357925	1.01518	0.0217314	0.999443	-0.000804093	20	0.811112	0.833034	0.0793373	0.136155	FALSE
SPNCRNA.1039	Caff10mM-40h	0.939759	-0.0896366	0.908803	-0.13796	0.940737	-0.0881365	0.926157	-0.110672	36	0.144104	0.322115	0.491989	0.211684	FALSE
SPNCRNA.1039	Can60ug-40h	0.937096	-0.0937314	0.906227	-0.142055	0.848784	-0.236531	0.835628	-0.259067	24	0.22782	0.346286	0.460565	0.226695	FALSE
SPNCRNA.1039	CoCl0.25mM-40h	1.01173	0.0168235	0.978402	-0.0315004	1.0235	0.0335051	1.00763	0.0109696	12	0.84144	0.949745	0.0223932	0.183104	FALSE
SPNCRNA.1039	Diam2mM-40h	0.803657	-0.315348	0.777184	-0.363672	0.759607	-0.396675	0.747834	-0.419211	12	0.00904002	0.0322051	1.49208	0.205889	FALSE
SPNCRNA.1039	EGTA10mM-40h	0.845804	-0.241604	0.817943	-0.289928	0.792997	-0.334613	0.780706	-0.357148	12	0.015875	0.0499768	1.30123	0.177819	FALSE
SPNCRNA.1039	EMM_Arg-40h	1.02889	0.0410926	0.995	-0.00723128	1.01005	0.0144287	0.994397	-0.0081067	24	0.750075	0.901989	0.044799	0.416456	FALSE
SPNCRNA.1039	EMM_Cyst-40h	1.00086	0.00123465	0.967887	-0.0470892	1.03717	0.0526543	1.0211	0.0301188	11	0.989445	0.989445	0.00460836	0.19496	FALSE
SPNCRNA.1039	EMM_Gal2-40h	0.91955	-0.121001	0.889259	-0.169324	0.879261	-0.185637	0.865633	-0.208173	24	0.0236477	0.0835077	1.07827	0.13849	FALSE
SPNCRNA.1039	EMM_Glu-40h	1.0366	0.0518524	1.00245	0.00352858	1.03958	0.0560069	1.02347	0.0334715	36	0.29696	0.565473	0.247588	0.173162	FALSE
SPNCRNA.1039	EMM_Gluc2-40h	0.978491	-0.0313692	0.946259	-0.0796931	1.0078	0.0112063	0.992178	-0.0113291	12	0.721855	0.905898	0.0429209	0.188884	FALSE
SPNCRNA.1039	EMM_Gluc3-40h	1.01535	0.0219807	0.981906	-0.0263431	1.01039	0.0149053	0.994725	-0.00763019	12	0.723412	0.892457	0.0494129	0.129627	FALSE
SPNCRNA.1039	EMM_Gly3-40h	0.943033	-0.0846206	0.911968	-0.132944	0.937694	-0.0928115	0.92316	-0.115347	24	0.0860402	0.188627	0.724397	0.128382	FALSE
SPNCRNA.1039	EMM_NH4Cl-40h	1	0	0.967059	-0.0483238	1	0	0.984501	-0.0225354	124	1	1	0	0.192626	FALSE
SPNCRNA.1039	EMM_Phe-40h	0.844246	-0.244265	0.816436	-0.292589	0.794426	-0.332016	0.782113	-0.354551	24	0.00168087	0.0144057	1.84147	0.197737	FALSE
SPNCRNA.1039	EMM_Pro-40h	1.25587	0.328693	1.21451	0.280369	1.1857	0.245737	1.16732	0.223201	35	0.000188109	0.000428888	3.36766	0.341053	TRUE
SPNCRNA.1039	H2O2_0.5mM-40h	1.14454	0.194774	1.10684	0.14645	1.07055	0.0983504	1.05396	0.075815	36	6.20718e-05	0.00235873	2.62732	0.166015	TRUE
SPNCRNA.1039	H2O2_1mM-40h	1.08997	0.124283	1.05406	0.0759594	1.06039	0.0846014	1.04396	0.062066	24	0.0162371	0.258113	0.588191	0.147176	FALSE
SPNCRNA.1039	H2O2_3mM-40h	1.14617	0.196823	1.10842	0.148499	1.11722	0.159907	1.0999	0.137371	24	0.000185561	0.003022	2.51971	0.145406	TRUE
SPNCRNA.1039	HU10mM-40h	1.01016	0.0145806	0.976882	-0.0337432	0.992195	-0.0113038	0.976817	-0.0338392	23	0.862341	0.911618	0.0401869	0.255988	FALSE
SPNCRNA.1039	HU20mM-40h	1.12626	0.171536	1.08916	0.123212	1.17596	0.233841	1.15774	0.211305	20	0.0178105	0.044139	1.35518	0.200858	FALSE
SPNCRNA.1039	HU5mM-40h	0.942816	-0.0849525	0.911759	-0.133276	0.982744	-0.0251122	0.967513	-0.0476477	36	0.214499	0.370497	0.431215	0.242532	FALSE
SPNCRNA.1039	MMS0.005-40h	0.892164	-0.164619	0.862776	-0.212943	0.88074	-0.183212	0.867089	-0.205747	32	0.0393634	0.236181	0.626756	0.259142	FALSE
SPNCRNA.1039	MMS0.0075-40h	1.09235	0.127438	1.05637	0.0791141	1.12415	0.168838	1.10673	0.146302	19	0.118574	0.350435	0.455393	0.227573	FALSE
SPNCRNA.1039	Rap100ng-40h	0.978021	-0.0320631	0.945804	-0.0803869	0.998214	-0.00257954	0.982742	-0.025115	36	0.419725	0.700833	0.154386	0.118274	FALSE
SPNCRNA.1039	SDS0.001-40h	1.1174	0.160144	1.08059	0.11182	1.10718	0.146888	1.09002	0.124353	20	0.00120975	0.00551647	2.25834	0.122173	TRUE
SPNCRNA.1039	SDS0.005-40h	0.868964	-0.202631	0.84034	-0.250955	0.81372	-0.297395	0.801109	-0.31993	20	0.017633	0.0804064	1.09471	0.208829	FALSE
SPNCRNA.1039	Sorb1.2M-40h	0.960833	-0.0576419	0.929183	-0.105966	0.978558	-0.0312714	0.963391	-0.0538068	12	0.367317	0.504507	0.297133	0.128176	FALSE
SPNCRNA.1039	TSA500nM-40h	0.967409	-0.0478023	0.935542	-0.0961261	0.930248	-0.104312	0.91583	-0.126848	24	0.32433	0.470896	0.327075	0.129728	FALSE
SPNCRNA.1039	Temp32C-40h	1.03867	0.0547305	1.00445	0.00640665	0.991025	-0.0130068	0.975665	-0.0355423	28	0.22339	0.54184	0.266129	0.132096	FALSE
SPNCRNA.1039	Temp37C-40h	1.10972	0.150194	1.07316	0.10187	1.09314	0.128484	1.0762	0.105948	36	0.00260779	0.00958995	2.01818	0.17436	TRUE
SPNCRNA.1039	Torin5uM-40h	0.906045	-0.142345	0.876199	-0.190669	0.885944	-0.174712	0.872213	-0.197248	24	0.0213748	0.116034	0.935413	0.16452	FALSE
SPNCRNA.1039	VPA3mM-40h	0.970722	-0.0428696	0.938746	-0.0911934	0.940435	-0.0885998	0.925859	-0.111135	30	0.529335	0.678025	0.168754	0.225271	FALSE
SPNCRNA.1039	VPA5mM-40h	1.07952	0.110389	1.04396	0.0620656	1.04191	0.0592368	1.02577	0.0367013	11	0.0120996	0.0260256	1.5846	0.0746485	FALSE
SPNCRNA.1064	Ant0.1ng-40h	0.997123	-0.00415602	1.04279	0.0604514	1.01094	0.0156975	1.06825	0.0952468	34	0.910394	0.935	0.0291886	0.13319	FALSE
SPNCRNA.1064	Ant1ng-40h	0.988494	-0.016696	1.03377	0.0479114	1.01109	0.0159158	1.06841	0.0954651	36	0.570838	0.699736	0.155066	0.0968779	FALSE
SPNCRNA.1064	Bleo20ug-40h	1.01947	0.0278168	1.06616	0.0924242	1.00498	0.00716759	1.06195	0.0867169	20	0.436888	0.541361	0.266513	0.0983664	FALSE
SPNCRNA.1064	Caff10mM-40h	1.04202	0.0593851	1.08975	0.123992	1.01814	0.0259366	1.07586	0.105486	36	0.0236062	0.0897034	1.04719	0.0804907	FALSE
SPNCRNA.1064	Can60ug-40h	1.10403	0.142782	1.1546	0.207389	1.08417	0.116596	1.14563	0.196145	24	4.19176e-06	4.34419e-05	4.36209	0.0811758	TRUE
SPNCRNA.1064	CoCl0.25mM-40h	1.04736	0.0667521	1.09533	0.13136	1.0367	0.0519974	1.09547	0.131547	12	0.00576828	0.0642631	1.19204	0.0368599	FALSE
SPNCRNA.1064	Diam2mM-40h	1.03988	0.0564227	1.08751	0.12103	1.03684	0.0521883	1.09561	0.131738	12	0.0258791	0.0702433	1.15339	0.0414908	FALSE
SPNCRNA.1064	EGTA10mM-40h	1.01695	0.0242555	1.06353	0.0888629	1.00911	0.0130803	1.06631	0.0926296	12	0.760735	0.839772	0.0758387	0.191535	FALSE
SPNCRNA.1064	EMM_Arg-40h	0.966798	-0.0487131	1.01108	0.0158943	0.999086	-0.00131978	1.05572	0.0782295	24	0.355491	0.654395	0.18416	0.168511	FALSE
SPNCRNA.1064	EMM_Cyst-40h	1.09252	0.127662	1.14256	0.192269	1.08938	0.123505	1.15113	0.203054	10	0.000943279	0.00719865	2.14275	0.0648241	TRUE
SPNCRNA.1064	EMM_Gal2-40h	1.01197	0.0171656	1.05832	0.0817731	1.01333	0.0191048	1.07077	0.0986541	24	0.46417	0.617073	0.209663	0.049902	FALSE
SPNCRNA.1064	EMM_Glu-40h	1.01446	0.0207116	1.06092	0.085319	1.02617	0.0372733	1.08434	0.116823	36	0.50385	0.717986	0.143884	0.107414	FALSE
SPNCRNA.1064	EMM_Gluc2-40h	1.01326	0.019007	1.05967	0.0836144	1.00533	0.00767008	1.06232	0.0872194	12	0.499042	0.758078	0.120286	0.0520151	FALSE
SPNCRNA.1064	EMM_Gluc3-40h	1.01857	0.0265515	1.06523	0.0911589	0.997047	-0.00426612	1.05357	0.0752832	12	0.411817	0.700704	0.154465	0.0652661	FALSE
SPNCRNA.1064	EMM_Gly3-40h	0.994659	-0.00772598	1.04021	0.0568814	1.00265	0.00382329	1.05949	0.0833726	24	0.802913	0.85544	0.0678103	0.0861725	FALSE
SPNCRNA.1064	EMM_NH4Cl-40h	1	0	1.0458	0.0646074	1	0	1.05669	0.0795493	123	1	1	0	0.151526	FALSE
SPNCRNA.1064	EMM_Phe-40h	0.996253	-0.0054164	1.04188	0.059191	1.01135	0.0162774	1.06868	0.0958267	24	0.893889	0.943577	0.0252228	0.126316	FALSE
SPNCRNA.1064	EMM_Pro-40h	1.14442	0.194615	1.19683	0.259222	1.11525	0.157363	1.17847	0.236912	36	1.22555e-05	4.36603e-05	4.35991	0.168821	TRUE
SPNCRNA.1064	H2O2_0.5mM-40h	1.02104	0.0300397	1.0678	0.0946471	0.994413	-0.0080833	1.05078	0.071466	36	0.36825	0.547466	0.261642	0.120561	FALSE
SPNCRNA.1064	H2O2_1mM-40h	1.02538	0.0361584	1.07234	0.100766	0.98112	-0.0274986	1.03674	0.0520507	24	0.45672	0.791953	0.101301	0.159061	FALSE
SPNCRNA.1064	H2O2_3mM-40h	1.06644	0.0927999	1.11528	0.157407	1.04498	0.0634767	1.10422	0.143026	24	0.00655605	0.0287458	1.54143	0.0991475	FALSE
SPNCRNA.1064	HU10mM-40h	1.10772	0.147597	1.15846	0.212204	1.09605	0.132308	1.15818	0.211858	24	1.40649e-05	0.000114528	3.94109	0.0931687	TRUE
SPNCRNA.1064	HU20mM-40h	1.12902	0.175066	1.18073	0.239674	1.12213	0.166236	1.18574	0.245786	19	0.00111019	0.00632811	2.19873	0.147449	TRUE
SPNCRNA.1064	HU5mM-40h	1.05602	0.0786377	1.10439	0.143245	1.05713	0.0801516	1.11706	0.159701	36	0.0168425	0.0914306	1.03891	0.117967	FALSE
SPNCRNA.1064	MMS0.005-40h	0.986527	-0.0195701	1.03171	0.0450373	0.973144	-0.0392754	1.02831	0.0402739	32	0.454555	0.624328	0.204587	0.0728234	FALSE
SPNCRNA.1064	MMS0.0075-40h	1.08282	0.1148	1.13242	0.179407	1.06062	0.0849026	1.12074	0.164452	24	2.03591e-05	0.000580233	3.2364	0.0655043	TRUE
SPNCRNA.1064	Rap100ng-40h	1.03687	0.0522307	1.08436	0.116838	0.963997	-0.0529002	1.01864	0.0266491	36	0.263588	0.589197	0.22974	0.187413	FALSE
SPNCRNA.1064	SDS0.001-40h	1.11613	0.158511	1.16725	0.223119	1.08911	0.123144	1.15084	0.202693	20	4.05104e-07	2.30909e-05	4.63656	0.0713119	TRUE
SPNCRNA.1064	SDS0.005-40h	0.997147	-0.00412203	1.04282	0.0604854	1.0139	0.0199091	1.07137	0.0994584	20	0.913408	0.994663	0.00232397	0.105347	FALSE
SPNCRNA.1064	Sorb1.2M-40h	0.988182	-0.0171509	1.03344	0.0474565	0.988618	-0.0165143	1.04466	0.063035	12	0.575904	0.689435	0.161507	0.0590295	FALSE
SPNCRNA.1064	TSA500nM-40h	1.01807	0.025831	1.06469	0.0904385	1.00105	0.00151273	1.0578	0.081062	24	0.279868	0.459101	0.338092	0.0527361	FALSE
SPNCRNA.1064	Temp32C-40h	0.959034	-0.0603455	1.00296	0.00426193	0.98304	-0.0246775	1.03877	0.0548718	27	0.0841614	0.392934	0.405681	0.104675	FALSE
SPNCRNA.1064	Temp37C-40h	1.03287	0.0466523	1.08017	0.11126	1.02892	0.0411272	1.08724	0.120677	36	0.134441	0.178212	0.749062	0.108962	FALSE
SPNCRNA.1064	Torin5uM-40h	1.07061	0.098432	1.11964	0.163039	1.05968	0.0836349	1.11976	0.163184	24	0.000509586	0.0072616	2.13897	0.0731418	TRUE
SPNCRNA.1064	VPA3mM-40h	1.00619	0.00890276	1.05227	0.0735102	1.00482	0.00693764	1.06178	0.0864869	30	0.756929	0.853043	0.0690288	0.0862078	FALSE
SPNCRNA.1064	VPA5mM-40h	1.18992	0.250868	1.24442	0.315475	1.16621	0.22183	1.23232	0.30138	12	8.84928e-09	2.01764e-07	6.69516	0.0659	TRUE
SPNCRNA.1073	Ant0.1ng-40h	1.00582	0.00837551	1.03398	0.0482145	1.00729	0.0104839	1.03877	0.0548753	35	0.801218	0.905508	0.0431076	0.114365	FALSE
SPNCRNA.1073	Ant1ng-40h	1.00362	0.00521265	1.03172	0.0450517	1.03542	0.0502103	1.06777	0.0946017	35	0.886599	0.910561	0.0406911	0.130691	FALSE
SPNCRNA.1073	Bleo20ug-40h	1.10793	0.147867	1.13895	0.187706	1.12688	0.17234	1.1621	0.216732	20	0.00144196	0.00941957	2.02597	0.126738	TRUE
SPNCRNA.1073	Caff10mM-40h	1.06153	0.0861452	1.09125	0.125984	1.06964	0.0971214	1.10306	0.141513	35	0.00781877	0.044567	1.35099	0.110374	FALSE
SPNCRNA.1073	Can60ug-40h	1.11281	0.154208	1.14397	0.194047	1.09349	0.128943	1.12766	0.173335	24	0.000300292	0.00171166	2.76658	0.125778	TRUE
SPNCRNA.1073	CoCl0.25mM-40h	0.977164	-0.0333272	1.00452	0.00651178	0.975055	-0.036445	1.00552	0.00794641	12	0.213048	0.474046	0.32418	0.0436057	FALSE
SPNCRNA.1073	Diam2mM-40h	1.05781	0.0810789	1.08743	0.120918	1.06497	0.0908143	1.09825	0.135206	12	0.00443287	0.0187166	1.72777	0.048865	FALSE
SPNCRNA.1073	EGTA10mM-40h	0.912574	-0.131987	0.938125	-0.0921479	0.912843	-0.131561	0.941368	-0.0871696	12	0.0691359	0.13474	0.870503	0.150152	FALSE
SPNCRNA.1073	EMM_Arg-40h	0.994538	-0.00790109	1.02238	0.0319379	1.01913	0.0273317	1.05097	0.0717231	24	0.852323	0.951102	0.0217728	0.130491	FALSE
SPNCRNA.1073	EMM_Cyst-40h	1.13196	0.17882	1.16365	0.218659	1.1442	0.194333	1.17995	0.238724	12	5.94707e-06	0.000135593	3.86776	0.0665894	TRUE
SPNCRNA.1073	EMM_Gal2-40h	0.996255	-0.00541334	1.02415	0.0344257	0.993466	-0.00945758	1.02451	0.0349339	24	0.868787	0.917504	0.0373918	0.0917135	FALSE
SPNCRNA.1073	EMM_Glu-40h	1.05881	0.0824458	1.08846	0.122285	1.05806	0.0814263	1.09113	0.125818	35	0.0139114	0.198237	0.702816	0.116395	FALSE
SPNCRNA.1073	EMM_Gluc2-40h	0.890689	-0.167006	0.915628	-0.127167	0.868713	-0.203048	0.895859	-0.158657	12	2.60515e-05	0.00147872	2.83011	0.0609353	TRUE
SPNCRNA.1073	EMM_Gluc3-40h	1.08341	0.115582	1.11375	0.155421	1.11412	0.155907	1.14894	0.200299	12	0.00817466	0.0931912	1.03063	0.088119	FALSE
SPNCRNA.1073	EMM_Gly3-40h	0.975472	-0.0358283	1.00278	0.00401074	0.972219	-0.040646	1.0026	0.00374542	24	0.450965	0.571222	0.243195	0.147412	FALSE
SPNCRNA.1073	EMM_NH4Cl-40h	1	0	1.028	0.039839	1	0	1.03125	0.0443914	124	1	1	0	0.15239	FALSE
SPNCRNA.1073	EMM_Phe-40h	1.05841	0.0818971	1.08804	0.121736	1.03005	0.0427087	1.06223	0.0871001	24	0.0471203	0.157992	0.801366	0.126596	FALSE
SPNCRNA.1073	EMM_Pro-40h	1.18899	0.24974	1.22228	0.289579	1.16502	0.220358	1.20143	0.264749	36	1.54634e-08	2.06494e-07	6.68509	0.156097	TRUE
SPNCRNA.1073	H2O2_0.5mM-40h	1.05856	0.0821088	1.0882	0.121948	1.03918	0.0554509	1.07166	0.0998423	36	0.0368325	0.145612	0.836803	0.147785	FALSE
SPNCRNA.1073	H2O2_1mM-40h	1.02406	0.0343063	1.05274	0.0741453	1.03135	0.0445379	1.06358	0.0889294	24	0.585522	0.836813	0.0773714	0.209174	FALSE
SPNCRNA.1073	H2O2_3mM-40h	1.11183	0.152937	1.14296	0.192776	1.06262	0.0876259	1.09582	0.132017	24	0.00345052	0.0231388	1.63566	0.164774	FALSE
SPNCRNA.1073	HU10mM-40h	1.11014	0.150741	1.14122	0.19058	1.14096	0.190248	1.17661	0.234639	24	0.000299971	0.00136787	2.86396	0.122301	TRUE
SPNCRNA.1073	HU20mM-40h	1.17223	0.229256	1.20505	0.269095	1.18433	0.244069	1.22134	0.28846	20	5.89077e-05	0.000671548	3.17292	0.152964	TRUE
SPNCRNA.1073	HU5mM-40h	1.01013	0.0145412	1.03841	0.0543802	1.00617	0.00886838	1.03761	0.0532598	36	0.64748	0.742148	0.129509	0.10857	FALSE
SPNCRNA.1073	MMS0.005-40h	1.02967	0.0421775	1.0585	0.0820165	1.06495	0.0907889	1.09823	0.13518	32	0.234355	0.477985	0.320585	0.120933	FALSE
SPNCRNA.1073	MMS0.0075-40h	0.967709	-0.0473546	0.994804	-0.00751554	1.03196	0.045388	1.06421	0.0897794	23	0.337634	0.610957	0.21399	0.149711	FALSE
SPNCRNA.1073	Rap100ng-40h	0.999684	-0.000456544	1.02767	0.0393825	0.973621	-0.0385682	1.00404	0.00582326	36	0.989853	0.989853	0.00442919	0.128954	FALSE
SPNCRNA.1073	SDS0.001-40h	1.1061	0.145486	1.13707	0.185325	1.06945	0.0968683	1.10287	0.14126	20	0.000503677	0.00302206	2.5197	0.110211	TRUE
SPNCRNA.1073	SDS0.005-40h	0.899308	-0.153113	0.924488	-0.113274	0.943699	-0.0836014	0.973188	-0.03921	20	0.0311342	0.12239	0.912256	0.192129	FALSE
SPNCRNA.1073	Sorb1.2M-40h	1.02708	0.0385534	1.05584	0.0783924	1.01284	0.018408	1.04449	0.0627994	12	0.377645	0.512519	0.29029	0.0953307	FALSE
SPNCRNA.1073	TSA500nM-40h	1.00108	0.00156391	1.02911	0.0414029	0.974984	-0.0365501	1.00545	0.00784139	24	0.962272	0.962272	0.0167023	0.0933135	FALSE
SPNCRNA.1073	Temp32C-40h	1.00365	0.00526011	1.03175	0.0450991	1.0097	0.0139285	1.04125	0.0583199	28	0.875871	0.931434	0.0308477	0.103877	FALSE
SPNCRNA.1073	Temp37C-40h	1.10252	0.140808	1.13339	0.180647	1.11886	0.162028	1.15382	0.206419	36	6.31558e-05	0.00119996	2.92083	0.123594	TRUE
SPNCRNA.1073	Torin5uM-40h	1.01844	0.0263654	1.04696	0.0662045	1.04354	0.061492	1.07615	0.105883	24	0.410419	0.646872	0.189182	0.0896447	FALSE
SPNCRNA.1073	VPA3mM-40h	1.03002	0.0426741	1.05886	0.0825132	1.03992	0.0564688	1.07241	0.10086	32	0.17156	0.343121	0.464553	0.0999609	FALSE
SPNCRNA.1073	VPA5mM-40h	1.2594	0.332736	1.29466	0.372575	1.16739	0.223282	1.20386	0.267673	12	0.00307453	0.00745738	2.12741	0.244769	TRUE
SPNCRNA.1088	Ant0.1ng-40h	0.992286	-0.0111719	1.03484	0.0494091	1.01156	0.016577	1.03193	0.0453436	36	0.638167	0.79267	0.100908	0.0691694	FALSE
SPNCRNA.1088	Ant1ng-40h	0.967613	-0.0474984	1.00911	0.0130826	1.00249	0.00358284	1.02268	0.0323495	36	0.0547538	0.16005	0.795746	0.072164	FALSE
SPNCRNA.1088	Bleo20ug-40h	1.11113	0.152029	1.15878	0.21261	1.10164	0.139654	1.12383	0.16842	20	0.000137046	0.00173592	2.76047	0.10508	TRUE
SPNCRNA.1088	Caff10mM-40h	1.00806	0.0115862	1.05129	0.0721672	1.06615	0.0924118	1.08762	0.121178	34	0.775782	0.86705	0.0619558	0.154694	FALSE
SPNCRNA.1088	Can60ug-40h	1.05436	0.0763742	1.09958	0.136955	1.09136	0.126129	1.11334	0.154896	24	0.0356794	0.0847386	1.07192	0.111711	FALSE
SPNCRNA.1088	CoCl0.25mM-40h	1.04795	0.0675694	1.09289	0.12815	1.11053	0.151247	1.13289	0.180013	12	0.0590381	0.280431	0.552174	0.0746235	FALSE
SPNCRNA.1088	Diam2mM-40h	0.952763	-0.0698109	0.993623	-0.00922991	1.0485	0.0683323	1.06962	0.0970989	12	0.33079	0.436859	0.359659	0.162993	FALSE
SPNCRNA.1088	EGTA10mM-40h	1.05946	0.0833255	1.10489	0.143907	1.08778	0.121389	1.10969	0.150156	12	0.00024303	0.002271	2.64378	0.0338302	TRUE
SPNCRNA.1088	EMM_Arg-40h	1.06219	0.0870447	1.10774	0.147626	1.02532	0.0360724	1.04597	0.064839	24	0.248585	0.530321	0.275461	0.261969	FALSE
SPNCRNA.1088	EMM_Cyst-40h	1.04281	0.0604701	1.08753	0.121051	1.09141	0.1262	1.1134	0.154966	11	0.180195	0.402789	0.394922	0.0963394	FALSE
SPNCRNA.1088	EMM_Gal2-40h	1.0014	0.00202466	1.04435	0.0626057	1.05612	0.0787786	1.07739	0.107545	24	0.959792	0.974956	0.0110148	0.12715	FALSE
SPNCRNA.1088	EMM_Glu-40h	1.05069	0.0713392	1.09575	0.13192	1.07761	0.107839	1.09932	0.136606	35	0.0447457	0.318813	0.496464	0.132993	FALSE
SPNCRNA.1088	EMM_Gluc2-40h	0.982688	-0.0251944	1.02483	0.0353866	1.0436	0.061573	1.06462	0.0903396	12	0.627722	0.851908	0.0696074	0.118408	FALSE
SPNCRNA.1088	EMM_Gluc3-40h	0.958513	-0.0611307	0.999619	-0.000549681	0.980696	-0.0281216	1.00045	0.000645054	12	0.121718	0.348845	0.457368	0.0813663	FALSE
SPNCRNA.1088	EMM_Gly3-40h	1.02351	0.0335203	1.0674	0.0941013	1.00499	0.0071745	1.02523	0.0359411	24	0.649392	0.731422	0.135832	0.253718	FALSE
SPNCRNA.1088	EMM_NH4Cl-40h	1	0	1.04289	0.060581	1	0	1.02014	0.0287666	124	1	1	0	0.140082	FALSE
SPNCRNA.1088	EMM_Phe-40h	0.980546	-0.028343	1.0226	0.032238	1.03461	0.0490898	1.05545	0.0778565	24	0.503461	0.699934	0.154943	0.133411	FALSE
SPNCRNA.1088	EMM_Pro-40h	1.18688	0.247174	1.23778	0.307755	1.19215	0.25356	1.21615	0.282326	34	2.96519e-07	1.69016e-06	5.77207	0.174361	TRUE
SPNCRNA.1088	H2O2_0.5mM-40h	1.1066	0.146134	1.15406	0.206715	1.13455	0.182117	1.1574	0.210884	36	0.000972861	0.0184844	1.7332	0.174388	FALSE
SPNCRNA.1088	H2O2_1mM-40h	1.06901	0.0962796	1.11486	0.156861	1.08063	0.111877	1.1024	0.140644	23	0.0167953	0.258113	0.588191	0.123149	FALSE
SPNCRNA.1088	H2O2_3mM-40h	1.09434	0.130064	1.14127	0.190645	1.14254	0.192241	1.16555	0.221008	22	0.00291722	0.0207852	1.68225	0.129776	FALSE
SPNCRNA.1088	HU10mM-40h	1.09933	0.136628	1.14648	0.197209	1.1622	0.216852	1.1856	0.245619	24	0.000455583	0.00192357	2.71589	0.116657	TRUE
SPNCRNA.1088	HU20mM-40h	1.16355	0.218533	1.21345	0.279114	1.19755	0.260083	1.22167	0.28885	20	9.14113e-05	0.000947354	3.02349	0.153165	TRUE
SPNCRNA.1088	HU5mM-40h	1.0115	0.0164949	1.05488	0.0770759	1.02769	0.0394066	1.04839	0.0681733	36	0.587066	0.682914	0.165634	0.108165	FALSE
SPNCRNA.1088	MMS0.005-40h	1.01415	0.0202707	1.05764	0.0808517	1.05387	0.0757035	1.0751	0.10447	32	0.398461	0.603619	0.219237	0.068041	FALSE
SPNCRNA.1088	MMS0.0075-40h	0.998909	-0.00157536	1.04175	0.0590056	1.01487	0.0212959	1.03531	0.0500625	24	0.965724	0.97427	0.0113204	0.113219	FALSE
SPNCRNA.1088	Rap100ng-40h	1.00048	0.000686019	1.04338	0.061267	1.00428	0.00616539	1.02451	0.034932	36	0.981401	0.989853	0.00442919	0.102448	FALSE
SPNCRNA.1088	SDS0.001-40h	1.05149	0.0724298	1.09658	0.133011	1.07454	0.103716	1.09618	0.132482	20	0.00909233	0.0287924	1.54072	0.0682792	FALSE
SPNCRNA.1088	SDS0.005-40h	0.979585	-0.0297575	1.0216	0.0308235	0.994139	-0.00848098	1.01416	0.0202856	20	0.28874	0.566852	0.246531	0.0686898	FALSE
SPNCRNA.1088	Sorb1.2M-40h	1.21592	0.282053	1.26807	0.342634	1.18743	0.247845	1.21135	0.276612	12	0.0127698	0.0632938	1.19864	0.261771	FALSE
SPNCRNA.1088	TSA500nM-40h	1.06473	0.0904936	1.1104	0.151075	1.10996	0.150504	1.13231	0.179271	24	0.00387905	0.0183177	1.73713	0.0898453	FALSE
SPNCRNA.1088	Temp32C-40h	1.00976	0.014018	1.05307	0.074599	1.02612	0.037205	1.04679	0.0659717	28	0.717682	0.889697	0.0507577	0.132209	FALSE
SPNCRNA.1088	Temp37C-40h	1.13425	0.181742	1.1829	0.242323	1.14404	0.194139	1.16708	0.222906	36	2.55078e-05	0.00104625	2.98036	0.16483	TRUE
SPNCRNA.1088	Torin5uM-40h	0.997842	-0.00311696	1.04063	0.057464	1.00546	0.00785306	1.02571	0.0366197	24	0.933842	0.984876	0.00661832	0.116652	FALSE
SPNCRNA.1088	VPA3mM-40h	1.03251	0.0461582	1.07679	0.106739	1.04715	0.0664662	1.06824	0.0952329	31	0.224068	0.391249	0.407547	0.13629	FALSE
SPNCRNA.1088	VPA5mM-40h	1.10172	0.139753	1.14896	0.200334	1.1597	0.213748	1.18305	0.242515	11	0.00330324	0.0078452	2.1054	0.0912305	TRUE
SPNCRNA.1097	Ant0.1ng-40h	0.981712	-0.0266289	1.00139	0.00199738	0.989338	-0.0154647	1.01342	0.0192331	60	0.345414	0.584708	0.233061	0.119345	FALSE
SPNCRNA.1097	Ant1ng-40h	0.969958	-0.0440057	0.989396	-0.0153794	0.995742	-0.00615637	1.01998	0.0285415	72	0.089638	0.232244	0.634055	0.111257	FALSE
SPNCRNA.1097	Bleo20ug-40h	1.00493	0.00709062	1.02507	0.0357169	1.0152	0.0217632	1.03991	0.0564611	44	0.871876	0.887445	0.0518585	0.189	FALSE
SPNCRNA.1097	Caff10mM-40h	1.05586	0.0784155	1.07702	0.107042	1.0217	0.0309702	1.04657	0.065668	71	0.00766492	0.044567	1.35099	0.144313	FALSE
SPNCRNA.1097	Can60ug-40h	1.08126	0.112715	1.10293	0.141341	1.08006	0.111107	1.10635	0.145805	47	0.000252486	0.00151492	2.81961	0.123413	TRUE
SPNCRNA.1097	CoCl0.25mM-40h	0.910835	-0.134738	0.929089	-0.106112	1.00771	0.011086	1.03224	0.0457839	24	0.135807	0.461767	0.335577	0.2828	FALSE
SPNCRNA.1097	Diam2mM-40h	1.05014	0.0705798	1.07118	0.0992061	1.0367	0.052005	1.06194	0.0867028	24	0.0635183	0.136624	0.864472	0.116292	FALSE
SPNCRNA.1097	EGTA10mM-40h	1.00756	0.010871	1.02776	0.0394973	0.935099	-0.0968089	0.957861	-0.062111	24	0.846124	0.910387	0.0407741	0.183351	FALSE
SPNCRNA.1097	EMM_Arg-40h	0.929527	-0.105431	0.948155	-0.0768046	0.896857	-0.15705	0.918688	-0.122352	24	0.152172	0.390712	0.408144	0.231073	FALSE
SPNCRNA.1097	EMM_Cyst-40h	1.12167	0.165643	1.14414	0.194269	1.12749	0.173111	1.15493	0.207809	24	7.18148e-05	0.000845289	3.07299	0.121243	TRUE
SPNCRNA.1097	EMM_Gal2-40h	0.841024	-0.249782	0.857878	-0.221155	0.911879	-0.133085	0.934077	-0.0983871	42	5.94464e-05	0.00111957	2.95095	0.226697	TRUE
SPNCRNA.1097	EMM_Glu-40h	1.06204	0.0868392	1.08332	0.115466	1.04897	0.0689681	1.0745	0.103666	71	0.00226284	0.064491	1.1905	0.137093	FALSE
SPNCRNA.1097	EMM_Gluc2-40h	0.962749	-0.0547676	0.982043	-0.0261414	0.963404	-0.0537872	0.986855	-0.0190894	20	0.186439	0.401019	0.396835	0.112905	FALSE
SPNCRNA.1097	EMM_Gluc3-40h	1.03912	0.0553633	1.05995	0.0839896	1.06531	0.0912741	1.09124	0.125972	28	0.286172	0.604142	0.218861	0.183714	FALSE
SPNCRNA.1097	EMM_Gly3-40h	1.08081	0.112112	1.10247	0.140738	1.0606	0.0848741	1.08641	0.119572	36	0.0105546	0.0481289	1.31759	0.170759	FALSE
SPNCRNA.1097	EMM_NH4Cl-40h	1	0	1.02004	0.0286263	1	0	1.02434	0.0346978	251	1	1	0	0.194664	FALSE
SPNCRNA.1097	EMM_Phe-40h	0.958536	-0.0610958	0.977745	-0.0324695	0.993408	-0.00954237	1.01759	0.0251555	52	0.152172	0.333608	0.476764	0.191297	FALSE
SPNCRNA.1097	EMM_Pro-40h	1.15676	0.210084	1.17994	0.23871	1.17876	0.237264	1.20745	0.271962	52	3.65658e-06	1.48875e-05	4.82718	0.211501	TRUE
SPNCRNA.1097	H2O2_0.5mM-40h	1.01641	0.0234786	1.03678	0.0521049	0.998806	-0.00172393	1.02312	0.0329739	64	0.501549	0.688874	0.16186	0.172513	FALSE
SPNCRNA.1097	H2O2_1mM-40h	1.00673	0.00967161	1.0269	0.0382979	1.0095	0.0136377	1.03407	0.0483356	48	0.764702	0.908084	0.0418741	0.133506	FALSE
SPNCRNA.1097	H2O2_3mM-40h	1.04084	0.0577414	1.06169	0.0863677	0.988728	-0.016354	1.0128	0.0183439	40	0.148869	0.273727	0.562682	0.162457	FALSE
SPNCRNA.1097	HU10mM-40h	1.07467	0.103897	1.09621	0.132523	1.056	0.0786048	1.0817	0.113303	60	0.001156	0.00366068	2.43644	0.149129	TRUE
SPNCRNA.1097	HU20mM-40h	1.07366	0.102536	1.09518	0.131162	1.07122	0.0992509	1.09729	0.133949	52	0.00064985	0.00411572	2.38555	0.126289	TRUE
SPNCRNA.1097	HU5mM-40h	1.03142	0.0446277	1.05209	0.073254	1.03841	0.0543714	1.06368	0.0890692	72	0.0785418	0.230313	0.637681	0.113051	FALSE
SPNCRNA.1097	MMS0.005-40h	0.997952	-0.00295749	1.01795	0.0256688	0.99107	-0.0129415	1.01519	0.0217564	68	0.90931	0.951021	0.0218099	0.111984	FALSE
SPNCRNA.1097	MMS0.0075-40h	0.960414	-0.058272	0.979661	-0.0296458	1.01178	0.0169011	1.03641	0.051599	60	0.0952738	0.319447	0.495601	0.159583	FALSE
SPNCRNA.1097	Rap100ng-40h	0.948813	-0.0758046	0.967827	-0.0471783	0.962499	-0.0551425	0.985929	-0.0204447	52	0.00717711	0.116884	0.932244	0.105673	FALSE
SPNCRNA.1097	SDS0.001-40h	0.986361	-0.0198118	1.00613	0.00881445	1.01697	0.024273	1.04172	0.0589708	56	0.584764	0.634887	0.197304	0.166096	FALSE
SPNCRNA.1097	SDS0.005-40h	1.02342	0.0333924	1.04393	0.0620186	1.04559	0.0643171	1.07104	0.099015	56	0.327493	0.597129	0.223931	0.156622	FALSE
SPNCRNA.1097	Sorb1.2M-40h	1.03369	0.0478043	1.05441	0.0764305	1.07382	0.102747	1.09996	0.137445	14	0.709947	0.778211	0.108903	0.335351	FALSE
SPNCRNA.1097	TSA500nM-40h	0.841287	-0.24933	0.858147	-0.220704	0.921858	-0.117383	0.944298	-0.0826854	45	7.0311e-05	0.000747054	3.12665	0.238694	TRUE
SPNCRNA.1097	Temp32C-40h	1.02184	0.0311648	1.04231	0.0597911	1.036	0.0510249	1.06122	0.0857227	64	0.231358	0.549476	0.260052	0.111127	FALSE
SPNCRNA.1097	Temp37C-40h	1.08887	0.122833	1.11069	0.151459	1.08639	0.119546	1.11284	0.154244	59	0.000135222	0.00154153	2.81205	0.14857	TRUE
SPNCRNA.1097	Torin5uM-40h	0.987707	-0.0178454	1.0075	0.0107809	0.994429	-0.00806042	1.01864	0.0266374	60	0.604454	0.806356	0.0934734	0.160901	FALSE
SPNCRNA.1097	VPA3mM-40h	1.02659	0.0378567	1.04716	0.066483	1.02618	0.0372823	1.05116	0.0719801	77	0.239916	0.391249	0.407547	0.17041	FALSE
SPNCRNA.1097	VPA5mM-40h	0.986091	-0.0202067	1.00585	0.00841957	0.99994	-8.70095e-05	1.02428	0.0346108	48	0.628635	0.709548	0.149018	0.18354	FALSE
SPNCRNA.1125	Ant0.1ng-40h	0.983648	-0.0237859	0.987473	-0.0181873	0.977354	-0.0330467	0.949912	-0.0741343	23	0.526824	0.750724	0.12452	0.0966294	FALSE
SPNCRNA.1125	Ant1ng-40h	0.93425	-0.0981187	0.937883	-0.0925202	0.968664	-0.045932	0.941466	-0.0870196	36	0.00453495	0.0343965	1.46349	0.0968025	FALSE
SPNCRNA.1125	Bleo20ug-40h	0.93661	-0.0944789	0.940252	-0.0888803	0.990322	-0.014031	0.962515	-0.0551186	24	0.0543162	0.116831	0.932442	0.136135	FALSE
SPNCRNA.1125	Caff10mM-40h	1.08388	0.116199	1.08809	0.121797	1.12919	0.175287	1.09748	0.134199	36	0.0271577	0.0970534	1.01299	0.200253	FALSE
SPNCRNA.1125	Can60ug-40h	1.05416	0.0760893	1.05826	0.0816878	1.13483	0.182472	1.10296	0.141385	22	0.102009	0.184588	0.733797	0.131991	FALSE
SPNCRNA.1125	CoCl0.25mM-40h	1.02321	0.033107	1.02719	0.0387056	1.02251	0.032108	0.993795	-0.00897959	12	0.453465	0.779139	0.108385	0.0898104	FALSE
SPNCRNA.1125	Diam2mM-40h	0.918174	-0.123161	0.921744	-0.117562	0.969555	-0.0446057	0.942332	-0.0856933	12	0.177249	0.2768	0.557834	0.191463	FALSE
SPNCRNA.1125	EGTA10mM-40h	0.86279	-0.212919	0.866144	-0.20732	0.917316	-0.124509	0.89156	-0.165597	12	0.014375	0.0469952	1.32795	0.161085	FALSE
SPNCRNA.1125	EMM_Arg-40h									0					FALSE
SPNCRNA.1125	EMM_Cyst-40h	0.949256	-0.075131	0.952947	-0.0695325	1.00708	0.0101808	0.978805	-0.0309068	12	0.278774	0.488927	0.310756	0.146556	FALSE
SPNCRNA.1125	EMM_Gal2-40h	0.979536	-0.0298296	0.983345	-0.0242311	1.01381	0.0197859	0.985343	-0.0213017	24	0.621038	0.762796	0.117592	0.185576	FALSE
SPNCRNA.1125	EMM_Glu-40h	1.04019	0.0568461	1.04423	0.0624447	1.09804	0.134927	1.06721	0.0938394	36	0.158552	0.451874	0.344983	0.13988	FALSE
SPNCRNA.1125	EMM_Gluc2-40h	1.0104	0.0149327	1.01433	0.0205313	1.06304	0.0882017	1.0332	0.0471141	8	0.739252	0.905898	0.0429209	0.0740614	FALSE
SPNCRNA.1125	EMM_Gluc3-40h	0.986773	-0.0192102	0.99061	-0.0136116	1.06432	0.0899294	1.03443	0.0488418	16	0.728057	0.892457	0.0494129	0.136455	FALSE
SPNCRNA.1125	EMM_Gly3-40h	0.904232	-0.145235	0.907748	-0.139636	0.930115	-0.104519	0.903999	-0.145607	12	0.0308229	0.100395	0.99829	0.128644	FALSE
SPNCRNA.1125	EMM_NH4Cl-40h	1	0	1.00389	0.00559855	1	0	0.971922	-0.0410876	127	1	1	0	0.181124	FALSE
SPNCRNA.1125	EMM_Phe-40h	0.92704	-0.109297	0.930644	-0.103698	0.976075	-0.0349366	0.948668	-0.0760242	28	0.0324625	0.123357	0.908835	0.153672	FALSE
SPNCRNA.1125	EMM_Pro-40h	0.970614	-0.0430297	0.974388	-0.0374311	0.899962	-0.152065	0.874693	-0.193152	15	0.658193	0.735628	0.133342	0.245641	FALSE
SPNCRNA.1125	H2O2_0.5mM-40h	1.06226	0.0871311	1.06639	0.0927297	1.11042	0.151105	1.07924	0.110018	27	0.0650319	0.218048	0.661448	0.149891	FALSE
SPNCRNA.1125	H2O2_1mM-40h	1.0178	0.0254484	1.02175	0.031047	1.05016	0.0706091	1.02067	0.0295215	24	0.505214	0.797004	0.0985397	0.104033	FALSE
SPNCRNA.1125	H2O2_3mM-40h	1.03694	0.0523385	1.04098	0.057937	1.05418	0.0761189	1.02458	0.0350313	15	0.287388	0.45015	0.346643	0.116271	FALSE
SPNCRNA.1125	HU10mM-40h	1.0116	0.0166323	1.01553	0.0222308	1.03818	0.0540635	1.00903	0.0129759	35	0.754284	0.868569	0.0611955	0.197101	FALSE
SPNCRNA.1125	HU20mM-40h	1.07939	0.110223	1.08359	0.115821	1.09081	0.125405	1.06019	0.0843176	31	0.0247654	0.056465	1.24822	0.169288	FALSE
SPNCRNA.1125	HU5mM-40h	0.962298	-0.0554442	0.96604	-0.0498457	1.00475	0.00683663	0.976539	-0.034251	35	0.121798	0.286039	0.543575	0.107335	FALSE
SPNCRNA.1125	MMS0.005-40h	0.998345	-0.00238916	1.00223	0.00320938	1.07088	0.0987904	1.04081	0.0577028	35	0.949358	0.957759	0.0187438	0.12145	FALSE
SPNCRNA.1125	MMS0.0075-40h	1.00403	0.00580848	1.00794	0.011407	1.03843	0.054402	1.00927	0.0133144	34	0.856066	0.920675	0.0358936	0.0899338	FALSE
SPNCRNA.1125	Rap100ng-40h	0.94424	-0.0827745	0.947911	-0.0771759	0.96339	-0.0538078	0.93634	-0.0948954	20	0.0422664	0.315736	0.500676	0.0957245	FALSE
SPNCRNA.1125	SDS0.001-40h	0.995532	-0.00646043	0.999403	-0.000861884	1.02236	0.031899	0.993651	-0.00918857	34	0.862361	0.877761	0.0566239	0.117597	FALSE
SPNCRNA.1125	SDS0.005-40h	0.950434	-0.0733409	0.95413	-0.0677424	0.994505	-0.0079495	0.966581	-0.0490371	35	0.0243067	0.103905	0.983365	0.0872083	FALSE
SPNCRNA.1125	Sorb1.2M-40h	0.910247	-0.13567	0.913786	-0.130072	0.920126	-0.120097	0.89429	-0.161185	4	0.160454	0.299864	0.523076	0.0976032	FALSE
SPNCRNA.1125	TSA500nM-40h	0.905309	-0.143518	0.908829	-0.137919	0.96156	-0.0565513	0.934561	-0.0976389	24	0.00123806	0.00809501	2.09178	0.110823	FALSE
SPNCRNA.1125	Temp32C-40h	1.04922	0.0693157	1.0533	0.0749142	1.14319	0.193067	1.11109	0.151979	35	0.0759573	0.392934	0.405681	0.13164	FALSE
SPNCRNA.1125	Temp37C-40h	1.06396	0.0894377	1.06809	0.0950362	1.07907	0.109782	1.04877	0.0686946	24	0.0553844	0.10332	0.985817	0.138511	FALSE
SPNCRNA.1125	Torin5uM-40h	0.93917	-0.0905411	0.942822	-0.0849425	1.0092	0.0132172	0.980867	-0.0278705	36	0.0471507	0.167974	0.774757	0.153291	FALSE
SPNCRNA.1125	VPA3mM-40h	0.85401	-0.227675	0.857331	-0.222076	0.851198	-0.232433	0.827298	-0.27352	48	1.58964e-07	4.53048e-06	5.34386	0.142614	TRUE
SPNCRNA.1125	VPA5mM-40h	0.921924	-0.11728	0.925509	-0.111681	0.970858	-0.0426684	0.943598	-0.083756	31	0.0552167	0.0899243	1.04612	0.202473	FALSE
SPNCRNA.1130	Ant0.1ng-40h	1.01463	0.0209487	1.07965	0.11057	1.02369	0.0337742	1.06017	0.0842934	36	0.43919	0.667568	0.175504	0.0883834	FALSE
SPNCRNA.1130	Ant1ng-40h	0.955507	-0.065662	1.01675	0.0239588	0.984927	-0.0219112	1.02003	0.0286079	36	0.00482758	0.0343965	1.46349	0.0566641	FALSE
SPNCRNA.1130	Bleo20ug-40h	1.04339	0.0612825	1.11026	0.150903	1.08038	0.111543	1.11889	0.162062	20	0.00424276	0.019347	1.71339	0.0364861	FALSE
SPNCRNA.1130	Caff10mM-40h	0.86226	-0.213805	0.917523	-0.124184	0.889748	-0.168532	0.921456	-0.118013	36	1.02501e-05	0.000292129	3.53443	0.161315	TRUE
SPNCRNA.1130	Can60ug-40h	0.984572	-0.0224307	1.04767	0.0671902	1.00935	0.0134315	1.04532	0.0639506	24	0.565433	0.678519	0.168438	0.121689	FALSE
SPNCRNA.1130	CoCl0.25mM-40h	1.05908	0.0828129	1.12696	0.172434	1.09039	0.12485	1.12925	0.17537	12	0.00212669	0.0346347	1.46049	0.0468118	FALSE
SPNCRNA.1130	Diam2mM-40h	0.871294	-0.198769	0.927136	-0.109148	0.835541	-0.259217	0.865318	-0.208698	12	0.0128562	0.043106	1.36546	0.157844	FALSE
SPNCRNA.1130	EGTA10mM-40h	0.996647	-0.00484564	1.06052	0.0847752	1.05229	0.0735297	1.08979	0.124049	12	0.936429	0.970688	0.0129201	0.14463	FALSE
SPNCRNA.1130	EMM_Arg-40h	1.22263	0.289986	1.30099	0.379607	1.20622	0.270498	1.24921	0.321017	24	4.72426e-05	0.000498672	3.30219	0.230467	TRUE
SPNCRNA.1130	EMM_Cyst-40h	0.977041	-0.0335093	1.03966	0.0561116	1.02311	0.0329676	1.05958	0.0834868	12	0.350258	0.546979	0.262029	0.075055	FALSE
SPNCRNA.1130	EMM_Gal2-40h	0.894244	-0.16126	0.951557	-0.0716387	0.926131	-0.110712	0.959136	-0.0601932	24	2.13377e-05	0.000482232	3.31674	0.0962766	TRUE
SPNCRNA.1130	EMM_Glu-40h	0.984484	-0.0225607	1.04758	0.0670602	1.02983	0.042405	1.06653	0.0929242	36	0.605735	0.796105	0.0990294	0.172452	FALSE
SPNCRNA.1130	EMM_Gluc2-40h	1.00182	0.00262913	1.06603	0.09225	1.02444	0.0348363	1.06095	0.0853554	12	0.941528	0.993136	0.00299143	0.0773525	FALSE
SPNCRNA.1130	EMM_Gluc3-40h	1.05653	0.0793398	1.12425	0.168961	1.08895	0.122942	1.12776	0.173462	12	0.000638539	0.0242645	1.61503	0.0343259	FALSE
SPNCRNA.1130	EMM_Gly3-40h	0.926789	-0.109688	0.986187	-0.0200671	0.952162	-0.0707215	0.986094	-0.0202024	24	0.000559985	0.00709314	2.14916	0.0807793	TRUE
SPNCRNA.1130	EMM_NH4Cl-40h	1	0	1.06409	0.0896209	1	0	1.03564	0.0505192	123	1	1	0	0.150669	FALSE
SPNCRNA.1130	EMM_Phe-40h	0.895168	-0.15977	0.95254	-0.0701487	0.883446	-0.178787	0.91493	-0.128267	24	0.000352406	0.00401742	2.39605	0.122295	TRUE
SPNCRNA.1130	EMM_Pro-40h	1.19101	0.252186	1.26734	0.341807	1.17089	0.227611	1.21262	0.27813	35	0.000146509	0.000355363	3.44933	0.275026	TRUE
SPNCRNA.1130	H2O2_0.5mM-40h	1.059	0.0827047	1.12687	0.172326	1.07348	0.102292	1.11173	0.152811	36	0.0635252	0.218048	0.661448	0.181006	FALSE
SPNCRNA.1130	H2O2_1mM-40h	0.974503	-0.0372609	1.03696	0.05236	1.01338	0.0191687	1.04949	0.0696879	24	0.474353	0.791953	0.101301	0.170978	FALSE
SPNCRNA.1130	H2O2_3mM-40h	1.09173	0.126614	1.1617	0.216235	1.11067	0.151435	1.15026	0.201954	24	0.00512628	0.0265635	1.57572	0.145074	FALSE
SPNCRNA.1130	HU10mM-40h	0.997635	-0.0034163	1.06157	0.0862046	1.0253	0.0360406	1.06184	0.0865597	24	0.933819	0.950494	0.0220505	0.131561	FALSE
SPNCRNA.1130	HU20mM-40h	1.10242	0.140673	1.17307	0.230294	1.15486	0.207715	1.19601	0.258234	20	0.00974408	0.0277706	1.55641	0.162956	FALSE
SPNCRNA.1130	HU5mM-40h	0.973194	-0.0392003	1.03557	0.0504206	1.04093	0.0578677	1.07802	0.108387	36	0.241485	0.398975	0.399054	0.119784	FALSE
SPNCRNA.1130	MMS0.005-40h	0.9953	-0.00679692	1.05909	0.0828239	1.02102	0.0300067	1.0574	0.0805259	32	0.74507	0.855557	0.0677513	0.0404735	FALSE
SPNCRNA.1130	MMS0.0075-40h	1.08554	0.118408	1.15511	0.208029	1.11412	0.155911	1.15383	0.20643	24	0.000245685	0.00350102	2.45581	0.0914302	TRUE
SPNCRNA.1130	Rap100ng-40h	1.07755	0.107758	1.14661	0.197379	1.06492	0.0907477	1.10287	0.141267	36	0.000321089	0.0183021	1.7375	0.103632	FALSE
SPNCRNA.1130	SDS0.001-40h	1.07575	0.105342	1.14469	0.194963	1.09559	0.131714	1.13464	0.182233	20	0.00145225	0.00636754	2.19603	0.0863241	TRUE
SPNCRNA.1130	SDS0.005-40h	0.901604	-0.149434	0.959389	-0.0598129	0.914029	-0.129688	0.946603	-0.0791693	20	0.00115438	0.0109666	1.95993	0.115607	FALSE
SPNCRNA.1130	Sorb1.2M-40h	0.942342	-0.0856769	1.00274	0.00394392	0.956348	-0.0643924	0.99043	-0.0138732	12	0.00414135	0.0277714	1.5564	0.0509209	FALSE
SPNCRNA.1130	TSA500nM-40h	0.976539	-0.03425	1.03913	0.0553708	1.01123	0.0161088	1.04727	0.066628	24	0.123518	0.249976	0.602101	0.0423512	FALSE
SPNCRNA.1130	Temp32C-40h	1.01338	0.0191747	1.07833	0.108796	1.05597	0.0785675	1.0936	0.129087	27	0.676648	0.889697	0.0507577	0.161191	FALSE
SPNCRNA.1130	Temp37C-40h	1.10451	0.143409	1.1753	0.23303	1.19437	0.256246	1.23693	0.306765	36	0.00379255	0.0127162	1.89564	0.203262	FALSE
SPNCRNA.1130	Torin5uM-40h	0.94424	-0.0827747	1.00476	0.00684615	0.97218	-0.0407053	1.00683	0.0098139	24	0.0372597	0.14268	0.845638	0.117264	FALSE
SPNCRNA.1130	VPA3mM-40h	0.868517	-0.203374	0.924181	-0.113753	0.894779	-0.160397	0.926666	-0.109878	32	2.81703e-07	6.27163e-06	5.20262	0.11399	TRUE
SPNCRNA.1130	VPA5mM-40h	1.00161	0.00232529	1.06581	0.0919461	1.00205	0.00295752	1.03776	0.0534767	10	0.966841	0.969156	0.0136064	0.120304	FALSE
SPNCRNA.115	Ant0.1ng-40h	1.03117	0.0442773	1.02274	0.0324385	1.04196	0.0593023	1.0356	0.0504681	35	0.184676	0.388633	0.410461	0.116985	FALSE
SPNCRNA.115	Ant1ng-40h	0.993822	-0.00894081	0.9857	-0.0207797	1.00189	0.00272326	0.995773	-0.00611092	52	0.69911	0.789095	0.102871	0.0758582	FALSE
SPNCRNA.115	Bleo20ug-40h	0.941793	-0.0865179	0.934096	-0.0983568	0.935484	-0.0962152	0.929773	-0.105049	36	0.0138314	0.0508637	1.29359	0.117004	FALSE
SPNCRNA.115	Caff10mM-40h	1.04974	0.0700347	1.04116	0.0581959	1.06075	0.0850825	1.05427	0.0762483	48	0.0135264	0.0700914	1.15434	0.108701	FALSE
SPNCRNA.115	Can60ug-40h	1.034	0.0482379	1.02555	0.036399	1.03221	0.0457318	1.02591	0.0368976	56	0.0976327	0.181928	0.740101	0.122527	FALSE
SPNCRNA.115	CoCl0.25mM-40h	1.05402	0.0758979	1.0454	0.0640591	1.0647	0.0904435	1.0582	0.0816093	30	0.00656802	0.0642631	1.19204	0.0824171	FALSE
SPNCRNA.115	Diam2mM-40h	1.00786	0.0113017	0.999628	-0.000537133	1.00605	0.00869621	0.999904	-0.000137967	24	0.76417	0.829671	0.0810943	0.112367	FALSE
SPNCRNA.115	EGTA10mM-40h	0.822324	-0.282221	0.815604	-0.294059	0.941732	-0.0866117	0.935983	-0.0954458	12	0.0697479	0.13474	0.870503	0.302295	FALSE
SPNCRNA.115	EMM_Arg-40h	1.01688	0.0241551	1.00857	0.0123162	0.98131	-0.0272192	0.975319	-0.0360533	4	0.873579	0.953908	0.0204933	0.192484	FALSE
SPNCRNA.115	EMM_Cyst-40h	0.990898	-0.0131918	0.9828	-0.0250307	0.946608	-0.0791615	0.940829	-0.0879957	16	0.783518	0.922083	0.0352298	0.120737	FALSE
SPNCRNA.115	EMM_Gal2-40h	0.972622	-0.0400482	0.964674	-0.051887	0.978753	-0.0309831	0.972778	-0.0398173	36	0.212317	0.380822	0.419278	0.108235	FALSE
SPNCRNA.115	EMM_Glu-40h	1.03645	0.0516445	1.02798	0.0398056	1.00826	0.0118716	1.00211	0.00303745	60	0.0323186	0.287401	0.541512	0.091973	FALSE
SPNCRNA.115	EMM_Gluc2-40h	1.03488	0.0494653	1.02642	0.0376264	1.06514	0.0910441	1.05864	0.0822099	20	0.319536	0.587534	0.230967	0.142797	FALSE
SPNCRNA.115	EMM_Gluc3-40h	0.994553	-0.00787986	0.986425	-0.0197187	0.970103	-0.0437899	0.964181	-0.0526241	32	0.82944	0.918021	0.0371472	0.124274	FALSE
SPNCRNA.115	EMM_Gly3-40h	0.975621	-0.0356076	0.967648	-0.0474464	0.97076	-0.0428128	0.964834	-0.0516469	16	0.199637	0.340217	0.468244	0.0571595	FALSE
SPNCRNA.115	EMM_NH4Cl-40h	1	0	0.991827	-0.0118389	1	0	0.993895	-0.00883418	211	1	1	0	0.171809	FALSE
SPNCRNA.115	EMM_Phe-40h	0.94928	-0.0750939	0.941522	-0.0869327	0.95695	-0.0634844	0.951108	-0.0723186	40	0.0360425	0.12958	0.887461	0.128595	FALSE
SPNCRNA.115	EMM_Pro-40h	1.059	0.0827046	1.05035	0.0708657	1.05825	0.0816873	1.05179	0.0728531	28	0.0464064	0.0867268	1.06185	0.136933	FALSE
SPNCRNA.115	H2O2_0.5mM-40h	1.03432	0.0486819	1.02587	0.036843	1.02751	0.0391523	1.02124	0.0303181	40	0.0436648	0.160574	0.794325	0.0746664	FALSE
SPNCRNA.115	H2O2_1mM-40h	1.03396	0.0481827	1.02551	0.0363438	1.02035	0.029064	1.01412	0.0202298	40	0.0772938	0.383108	0.416678	0.0929665	FALSE
SPNCRNA.115	H2O2_3mM-40h	1.04857	0.068425	1.04	0.0565861	1.06629	0.0926004	1.05978	0.0837663	28	0.0368623	0.105058	0.978573	0.1011	FALSE
SPNCRNA.115	HU10mM-40h	1.04039	0.0571269	1.03189	0.0452881	1.03295	0.0467698	1.02664	0.0379356	72	0.0411894	0.0838498	1.0765	0.131166	FALSE
SPNCRNA.115	HU20mM-40h	1.06291	0.088014	1.05422	0.0761751	1.04897	0.0689766	1.04257	0.0601424	64	0.00531567	0.0168329	1.77384	0.148141	FALSE
SPNCRNA.115	HU5mM-40h	1.01292	0.0185174	1.00464	0.00667849	1.0187	0.0267284	1.01248	0.0178942	72	0.472241	0.618798	0.208451	0.112733	FALSE
SPNCRNA.115	MMS0.005-40h	1.03901	0.0552033	1.03051	0.0433644	1.03517	0.049867	1.02885	0.0410329	72	0.0124211	0.131491	0.881105	0.0831868	FALSE
SPNCRNA.115	MMS0.0075-40h	1.02235	0.0318839	1.01399	0.0200451	1.02373	0.0338359	1.01748	0.0250018	71	0.195207	0.467655	0.330075	0.103519	FALSE
SPNCRNA.115	Rap100ng-40h	1.02678	0.0381333	1.01839	0.0262945	1.05193	0.0730376	1.04551	0.0642035	48	0.386335	0.689397	0.16153	0.194465	FALSE
SPNCRNA.115	SDS0.001-40h	1.02577	0.0367041	1.01738	0.0248652	1.01396	0.0199962	1.00777	0.011162	72	0.111763	0.176959	0.752128	0.0915451	FALSE
SPNCRNA.115	SDS0.005-40h	1.05464	0.0767525	1.04602	0.0649137	1.04353	0.0614692	1.03716	0.052635	63	0.00142621	0.0125068	1.90285	0.0940774	FALSE
SPNCRNA.115	Sorb1.2M-40h	0.847538	-0.238651	0.840611	-0.250489	0.842862	-0.246631	0.837717	-0.255465	15	0.0655843	0.159077	0.798393	0.290793	FALSE
SPNCRNA.115	TSA500nM-40h	1.01686	0.0241248	1.00855	0.0122859	0.938337	-0.0918218	0.932609	-0.100656	24	0.741324	0.818345	0.0870635	0.238618	FALSE
SPNCRNA.115	Temp32C-40h	1.01675	0.02396	1.00844	0.0121211	1.01028	0.0147536	1.00411	0.00591938	60	0.339594	0.676085	0.169999	0.0982594	FALSE
SPNCRNA.115	Temp37C-40h	1.10681	0.146412	1.09777	0.134573	1.03968	0.0561369	1.03333	0.0473027	43	3.45569e-05	0.00104625	2.98036	0.136789	FALSE
SPNCRNA.115	Torin5uM-40h	1.04035	0.0570742	1.03185	0.0452353	1.05646	0.079234	1.05001	0.0703998	60	0.0357015	0.14268	0.845638	0.11395	FALSE
SPNCRNA.115	VPA3mM-40h	1.05547	0.0778833	1.04684	0.0660444	1.04471	0.0631031	1.03833	0.0542689	55	0.00553493	0.0260225	1.58465	0.114841	FALSE
SPNCRNA.115	VPA5mM-40h	1.05981	0.0838027	1.05115	0.0719639	1.074	0.102988	1.06744	0.094154	48	0.0187091	0.0394971	1.40344	0.150218	FALSE
SPNCRNA.1154	Ant0.1ng-40h	0.93548	-0.096222	0.980354	-0.0286248	0.954171	-0.0676798	0.967946	-0.0470011	24	0.00209835	0.039627	1.40201	0.0615295	FALSE
SPNCRNA.1154	Ant1ng-40h	0.943618	-0.0837245	0.988884	-0.0161273	0.981129	-0.0274846	0.995294	-0.00680594	36	0.00608487	0.0408044	1.38929	0.0726673	FALSE
SPNCRNA.1154	Bleo20ug-40h	0.970924	-0.0425704	1.0175	0.0250268	1.00504	0.00725131	1.01955	0.02793	24	0.217566	0.317981	0.497599	0.0843904	FALSE
SPNCRNA.1154	Caff10mM-40h	0.913508	-0.130511	0.957329	-0.0629135	0.898085	-0.155077	0.91105	-0.134398	36	0.0162387	0.0740484	1.13048	0.193036	FALSE
SPNCRNA.1154	Can60ug-40h	0.919194	-0.121559	0.963288	-0.0539614	0.961305	-0.0569337	0.975183	-0.036255	24	0.00381827	0.0161216	1.79259	0.107759	FALSE
SPNCRNA.1154	CoCl0.25mM-40h	0.91768	-0.123936	0.961701	-0.0563392	0.975435	-0.0358829	0.989517	-0.0152042	12	0.0649271	0.291945	0.534698	0.137819	FALSE
SPNCRNA.1154	Diam2mM-40h	0.765267	-0.385964	0.801977	-0.318367	0.741717	-0.43106	0.752424	-0.410381	12	8.59389e-05	0.00108856	2.96315	0.148116	TRUE
SPNCRNA.1154	EGTA10mM-40h	0.839391	-0.252586	0.879656	-0.184988	0.887177	-0.172706	0.899985	-0.152027	12	0.00183953	0.00868665	2.06115	0.142767	TRUE
SPNCRNA.1154	EMM_Arg-40h									0					FALSE
SPNCRNA.1154	EMM_Cyst-40h	0.837924	-0.255108	0.87812	-0.187511	0.869433	-0.201853	0.881985	-0.181174	12	2.73017e-06	0.000135593	3.86776	0.0790505	TRUE
SPNCRNA.1154	EMM_Gal2-40h	0.837967	-0.255034	0.878164	-0.187437	0.850212	-0.234105	0.862486	-0.213427	24	2.41134e-07	1.36241e-05	4.86569	0.11206	TRUE
SPNCRNA.1154	EMM_Glu-40h	0.979028	-0.0305778	1.02599	0.0370194	1.02886	0.0410478	1.04371	0.0617265	36	0.462069	0.683514	0.165253	0.144459	FALSE
SPNCRNA.1154	EMM_Gluc2-40h	1.08023	0.111341	1.13205	0.178938	1.11791	0.160804	1.13405	0.181482	8	0.138731	0.359439	0.444375	0.137675	FALSE
SPNCRNA.1154	EMM_Gluc3-40h	1.07721	0.107296	1.12888	0.174894	1.12304	0.167412	1.13925	0.18809	15	0.0540525	0.245535	0.609886	0.138075	FALSE
SPNCRNA.1154	EMM_Gly3-40h	0.818303	-0.289293	0.857557	-0.221695	0.838641	-0.253875	0.850748	-0.233196	12	6.60534e-06	0.000320582	3.49406	0.0940833	TRUE
SPNCRNA.1154	EMM_NH4Cl-40h	1	0	1.04797	0.0675972	1	0	1.01444	0.0206787	128	1	1	0	0.197359	FALSE
SPNCRNA.1154	EMM_Phe-40h	0.842573	-0.247126	0.882991	-0.179529	0.856322	-0.223774	0.868685	-0.203096	28	1.20661e-09	4.58513e-08	7.33865	0.0901257	TRUE
SPNCRNA.1154	EMM_Pro-40h	0.990372	-0.0139582	1.03788	0.0536391	0.958023	-0.0618683	0.971853	-0.0411896	16	0.849988	0.897209	0.0471061	0.198593	FALSE
SPNCRNA.1154	H2O2_0.5mM-40h	1.06001	0.084082	1.11086	0.151679	1.06041	0.0846261	1.07572	0.105305	28	0.0383189	0.145612	0.836803	0.127107	FALSE
SPNCRNA.1154	H2O2_1mM-40h	1.01309	0.0187639	1.06169	0.0863611	1.03147	0.0446965	1.04636	0.0653752	24	0.637943	0.836813	0.0773714	0.113415	FALSE
SPNCRNA.1154	H2O2_3mM-40h	1.03386	0.0480357	1.08345	0.115633	1.04768	0.0672017	1.06281	0.0878804	16	0.417969	0.554051	0.25645	0.157034	FALSE
SPNCRNA.1154	HU10mM-40h	0.912229	-0.132532	0.955989	-0.0649344	0.962136	-0.0556875	0.976026	-0.0350088	36	0.0010403	0.0033884	2.47001	0.124669	FALSE
SPNCRNA.1154	HU20mM-40h	0.97976	-0.0295	1.02676	0.0380972	1.03816	0.0540313	1.05315	0.07471	32	0.459711	0.606958	0.216841	0.12776	FALSE
SPNCRNA.1154	HU5mM-40h	0.894317	-0.161141	0.937218	-0.0935441	0.92316	-0.115347	0.936488	-0.0946683	36	5.42221e-06	0.000123626	3.90789	0.0927122	TRUE
SPNCRNA.1154	MMS0.005-40h	0.938699	-0.0912654	0.983728	-0.0236682	0.968711	-0.0458624	0.982695	-0.0251837	36	0.00387608	0.0552342	1.25779	0.0792623	FALSE
SPNCRNA.1154	MMS0.0075-40h	0.979869	-0.0293394	1.02687	0.0382578	1.01672	0.0239274	1.0314	0.0446061	36	0.376655	0.660595	0.180064	0.0969163	FALSE
SPNCRNA.1154	Rap100ng-40h	0.995887	-0.00594589	1.04366	0.0616513	1.0244	0.0347812	1.03919	0.0554599	20	0.89881	0.957611	0.018811	0.128678	FALSE
SPNCRNA.1154	SDS0.001-40h	0.935834	-0.0956757	0.980726	-0.0280785	0.985883	-0.0205113	1.00012	0.000167426	36	0.00984596	0.0303362	1.51804	0.112091	FALSE
SPNCRNA.1154	SDS0.005-40h	0.887896	-0.171537	0.930489	-0.10394	0.892614	-0.163892	0.9055	-0.143213	36	4.37622e-07	1.66296e-05	4.77912	0.0819894	TRUE
SPNCRNA.1154	Sorb1.2M-40h	0.82794	-0.272402	0.867656	-0.204805	0.881345	-0.182221	0.894069	-0.161542	4	0.00623186	0.0394684	1.40375	0.0687302	FALSE
SPNCRNA.1154	TSA500nM-40h	0.924712	-0.112925	0.96907	-0.0453275	0.951294	-0.0720375	0.965027	-0.0513588	24	0.0015827	0.00960928	2.01731	0.0818147	TRUE
SPNCRNA.1154	Temp32C-40h	1.05403	0.0759222	1.1046	0.143519	1.10805	0.148025	1.12405	0.168703	36	0.0850081	0.392934	0.405681	0.163724	FALSE
SPNCRNA.1154	Temp37C-40h	1.03773	0.0534288	1.08751	0.121026	1.02694	0.0383552	1.04177	0.0590339	24	0.320391	0.392737	0.405898	0.172149	FALSE
SPNCRNA.1154	Torin5uM-40h	0.910086	-0.135925	0.953743	-0.0683275	0.959933	-0.0589941	0.973791	-0.0383154	36	0.000361663	0.00588994	2.22989	0.111853	FALSE
SPNCRNA.1154	VPA3mM-40h	0.863394	-0.211909	0.904811	-0.144311	0.869193	-0.202251	0.881741	-0.181572	48	1.98238e-08	1.12996e-06	5.94694	0.114906	TRUE
SPNCRNA.1154	VPA5mM-40h	0.809973	-0.304054	0.848828	-0.236456	0.817258	-0.291136	0.829057	-0.270458	36	1.37708e-06	1.30823e-05	4.88332	0.195079	TRUE
SPNCRNA.1165	Ant0.1ng-40h	0.995808	-0.00606119	1.11921	0.16248	1.00171	0.00245882	1.12014	0.163684	21	0.875352	0.935	0.0291886	0.126109	FALSE
SPNCRNA.1165	Ant1ng-40h	0.991566	-0.0122195	1.11444	0.156322	0.997706	-0.00331267	1.11567	0.157912	36	0.599133	0.726608	0.1387	0.0837005	FALSE
SPNCRNA.1165	Bleo20ug-40h	0.9287	-0.106715	1.04379	0.0618261	0.973581	-0.0386269	1.08869	0.122598	24	0.0421352	0.101685	0.992744	0.175725	FALSE
SPNCRNA.1165	Caff10mM-40h	0.958332	-0.0614026	1.07709	0.107139	0.950846	-0.0727164	1.06327	0.0885086	36	0.0853432	0.22286	0.651968	0.145051	FALSE
SPNCRNA.1165	Can60ug-40h	1.12926	0.175381	1.2692	0.343923	1.12572	0.170851	1.25882	0.332076	24	1.89936e-06	2.40585e-05	4.61873	0.111997	TRUE
SPNCRNA.1165	CoCl0.25mM-40h	1.01149	0.0164798	1.13683	0.185021	0.995938	-0.00587277	1.11369	0.155352	12	0.677123	0.862331	0.0643258	0.097726	FALSE
SPNCRNA.1165	Diam2mM-40h	0.978644	-0.0311435	1.09992	0.137398	0.998262	-0.0025096	1.11629	0.158715	12	0.296938	0.414824	0.382136	0.0669559	FALSE
SPNCRNA.1165	EGTA10mM-40h	1.02805	0.0399147	1.15545	0.208456	1.0201	0.0287131	1.14071	0.189938	12	0.549726	0.667524	0.175533	0.173131	FALSE
SPNCRNA.1165	EMM_Arg-40h									0					FALSE
SPNCRNA.1165	EMM_Cyst-40h	1.02879	0.0409495	1.15628	0.209491	1.04009	0.0567082	1.16307	0.217933	12	0.259748	0.488927	0.310756	0.0875035	FALSE
SPNCRNA.1165	EMM_Gal2-40h	0.902513	-0.147981	1.01435	0.0205602	0.963793	-0.0532053	1.07775	0.10802	24	0.00138729	0.00979774	2.00887	0.142107	FALSE
SPNCRNA.1165	EMM_Glu-40h	0.953444	-0.0687801	1.0716	0.0997612	0.958819	-0.0606695	1.07219	0.100556	36	0.00214397	0.064491	1.1905	0.0729059	FALSE
SPNCRNA.1165	EMM_Gluc2-40h	1.13276	0.179843	1.27313	0.348384	1.13587	0.183804	1.27018	0.345029	8	0.0312439	0.17809	0.74936	0.156832	FALSE
SPNCRNA.1165	EMM_Gluc3-40h	1.02203	0.031439	1.14868	0.19998	1.0349	0.04949	1.15726	0.210715	16	0.569497	0.801368	0.096168	0.164708	FALSE
SPNCRNA.1165	EMM_Gly3-40h	0.991225	-0.0127149	1.11406	0.155826	1.00469	0.00674663	1.12348	0.167972	12	0.67438	0.739224	0.131224	0.0697842	FALSE
SPNCRNA.1165	EMM_NH4Cl-40h	1	0	1.12392	0.168541	1	0	1.11824	0.161225	128	1	1	0	0.1281	FALSE
SPNCRNA.1165	EMM_Phe-40h	1.03647	0.0516716	1.16491	0.220213	1.04465	0.0630129	1.16816	0.224238	28	0.0648283	0.193758	0.712739	0.0979685	FALSE
SPNCRNA.1165	EMM_Pro-40h	1.03158	0.0448497	1.15941	0.213391	0.932983	-0.100077	1.0433	0.0611479	16	0.613733	0.706723	0.150751	0.271949	FALSE
SPNCRNA.1165	H2O2_0.5mM-40h	0.963296	-0.0539494	1.08267	0.114592	0.940417	-0.0886274	1.05161	0.0725976	28	0.10345	0.25183	0.598892	0.116693	FALSE
SPNCRNA.1165	H2O2_1mM-40h	1.00157	0.00226941	1.12569	0.170811	0.952	-0.0709661	1.06456	0.090259	24	0.960671	0.969172	0.013599	0.165173	FALSE
SPNCRNA.1165	H2O2_3mM-40h	0.938641	-0.0913539	1.05496	0.0771874	0.924549	-0.113179	1.03386	0.0480463	16	0.0294951	0.0884854	1.05313	0.108868	FALSE
SPNCRNA.1165	HU10mM-40h	0.984157	-0.0230393	1.10612	0.145502	0.99771	-0.00330767	1.11568	0.157917	36	0.547977	0.701903	0.153723	0.162968	FALSE
SPNCRNA.1165	HU20mM-40h	1.01799	0.0257287	1.14415	0.19427	1.03636	0.0515186	1.15889	0.212744	32	0.519244	0.657709	0.181966	0.163899	FALSE
SPNCRNA.1165	HU5mM-40h	1.00288	0.00414391	1.12715	0.172685	1.03069	0.0436137	1.15256	0.204839	36	0.887802	0.928527	0.0322057	0.118857	FALSE
SPNCRNA.1165	MMS0.005-40h	0.961776	-0.0562275	1.08096	0.112314	0.981904	-0.0263467	1.098	0.134878	36	0.0126877	0.131491	0.881105	0.0754175	FALSE
SPNCRNA.1165	MMS0.0075-40h	0.975397	-0.0359383	1.09627	0.132603	1.00314	0.00452094	1.12175	0.165746	36	0.278375	0.532357	0.273797	0.135428	FALSE
SPNCRNA.1165	Rap100ng-40h	1.02135	0.0304831	1.14792	0.199024	1.10819	0.148211	1.23922	0.309436	20	0.665359	0.824854	0.0836228	0.239317	FALSE
SPNCRNA.1165	SDS0.001-40h	0.964955	-0.0514664	1.08453	0.117075	0.999095	-0.00130557	1.11722	0.159919	36	0.079339	0.13704	0.863152	0.113745	FALSE
SPNCRNA.1165	SDS0.005-40h	1.00305	0.00438778	1.12734	0.172929	1.02252	0.0321282	1.14342	0.193353	35	0.848425	0.967204	0.0144819	0.081693	FALSE
SPNCRNA.1165	Sorb1.2M-40h	1.11099	0.151847	1.24867	0.320388	1.02616	0.0372558	1.14749	0.198481	3	0.353247	0.499108	0.301805	0.18027	FALSE
SPNCRNA.1165	TSA500nM-40h	0.906795	-0.141151	1.01917	0.0273902	0.937023	-0.0938433	1.04781	0.0673818	24	0.0269269	0.0789235	1.10279	0.211807	FALSE
SPNCRNA.1165	Temp32C-40h	0.951145	-0.0722621	1.06901	0.0962792	0.948071	-0.0769332	1.06017	0.0842919	36	0.00292115	0.0832528	1.0796	0.0833855	FALSE
SPNCRNA.1165	Temp37C-40h	0.973399	-0.0388968	1.09402	0.129645	0.970721	-0.0428718	1.0855	0.118353	24	0.0976225	0.140873	0.851172	0.0670799	FALSE
SPNCRNA.1165	Torin5uM-40h	1.02809	0.0399702	1.1555	0.208512	1.05844	0.0819393	1.18359	0.243164	36	0.189567	0.402594	0.395132	0.125479	FALSE
SPNCRNA.1165	VPA3mM-40h	1.01506	0.0215641	1.14085	0.190105	1.02494	0.0355384	1.14612	0.196763	48	0.431895	0.593205	0.226795	0.126084	FALSE
SPNCRNA.1165	VPA5mM-40h	0.948572	-0.0761702	1.06612	0.0923711	0.959583	-0.0595209	1.07304	0.101704	36	0.0444938	0.0777248	1.10944	0.153868	FALSE
SPNCRNA.1166	Ant0.1ng-40h	1.00407	0.00585577	1.04272	0.0603506	1.05355	0.0752639	1.09656	0.132989	22	0.908182	0.935	0.0291886	0.158315	FALSE
SPNCRNA.1166	Ant1ng-40h	0.891708	-0.165356	0.926035	-0.110861	0.920384	-0.119692	0.957958	-0.0619663	35	0.000104955	0.00398829	2.39921	0.138885	TRUE
SPNCRNA.1166	Bleo20ug-40h	0.944971	-0.0816581	0.981348	-0.0271633	0.910382	-0.135456	0.947547	-0.0777307	24	0.0343215	0.0931583	1.03078	0.109947	FALSE
SPNCRNA.1166	Caff10mM-40h	1.01229	0.0176258	1.05126	0.0721206	0.992932	-0.0102332	1.03347	0.0474923	36	0.644176	0.85748	0.0667761	0.144265	FALSE
SPNCRNA.1166	Can60ug-40h	1.08948	0.123638	1.13142	0.178133	1.06713	0.0937301	1.11069	0.151456	24	0.0111053	0.0342164	1.46577	0.155603	FALSE
SPNCRNA.1166	CoCl0.25mM-40h	1.01533	0.0219496	1.05442	0.0764444	1.01774	0.0253686	1.05929	0.0830941	6	0.693886	0.862331	0.0643258	0.088901	FALSE
SPNCRNA.1166	Diam2mM-40h	1.00391	0.0056368	1.04256	0.0601316	0.981426	-0.0270481	1.02149	0.0306774	12	0.903699	0.911696	0.04015	0.104796	FALSE
SPNCRNA.1166	EGTA10mM-40h	0.854601	-0.226677	0.8875	-0.172182	0.82362	-0.279949	0.857243	-0.222224	11	0.000973276	0.00590918	2.22847	0.110737	TRUE
SPNCRNA.1166	EMM_Arg-40h									0					FALSE
SPNCRNA.1166	EMM_Cyst-40h	1.09635	0.132713	1.13856	0.187208	1.02755	0.0392036	1.06949	0.0969291	12	0.0852155	0.263136	0.57982	0.179605	FALSE
SPNCRNA.1166	EMM_Gal2-40h	1.08176	0.113381	1.1234	0.167876	1.04369	0.0616959	1.0863	0.119421	24	0.0186029	0.0760697	1.11879	0.154434	FALSE
SPNCRNA.1166	EMM_Glu-40h	1.03679	0.0521246	1.0767	0.106619	1.01762	0.0251921	1.05916	0.0829176	36	0.0972274	0.390574	0.408296	0.110597	FALSE
SPNCRNA.1166	EMM_Gluc2-40h	1.11209	0.153274	1.1549	0.207769	1.13297	0.18011	1.17922	0.237835	8	0.0165178	0.145782	0.836296	0.105217	FALSE
SPNCRNA.1166	EMM_Gluc3-40h	1.05246	0.0737713	1.09298	0.128266	1.02179	0.0310992	1.0635	0.0888247	16	0.379956	0.687539	0.162703	0.235638	FALSE
SPNCRNA.1166	EMM_Gly3-40h	1.02376	0.0338786	1.06317	0.0883734	0.996229	-0.00545	1.0369	0.0522755	12	0.660846	0.731422	0.135832	0.184485	FALSE
SPNCRNA.1166	EMM_NH4Cl-40h	1	0	1.0385	0.0544948	1	0	1.04082	0.0577255	125	1	1	0	0.149102	FALSE
SPNCRNA.1166	EMM_Phe-40h	1.07782	0.108121	1.11931	0.162616	0.99915	-0.0012269	1.03994	0.0564986	28	0.129553	0.30141	0.520843	0.265374	FALSE
SPNCRNA.1166	EMM_Pro-40h	1.04745	0.0668847	1.08777	0.121379	0.981026	-0.0276371	1.02107	0.0300884	16	0.23726	0.338096	0.47096	0.152421	FALSE
SPNCRNA.1166	H2O2_0.5mM-40h	1.01602	0.0229304	1.05513	0.0774252	1.00224	0.00322661	1.04315	0.0609521	28	0.389304	0.568982	0.244901	0.073288	FALSE
SPNCRNA.1166	H2O2_1mM-40h	1.00703	0.0101109	1.0458	0.0646057	1.00331	0.00476817	1.04427	0.0624937	24	0.732556	0.888419	0.0513821	0.0811755	FALSE
SPNCRNA.1166	H2O2_3mM-40h	1.05082	0.0715168	1.09127	0.126012	1.00132	0.0019054	1.0422	0.0596309	16	0.136252	0.258043	0.588309	0.125342	FALSE
SPNCRNA.1166	HU10mM-40h	1.05105	0.07183	1.09151	0.126325	1.04668	0.0658178	1.08941	0.123543	36	0.0940022	0.164865	0.78287	0.168414	FALSE
SPNCRNA.1166	HU20mM-40h	1.17239	0.229447	1.21752	0.283941	1.10832	0.148373	1.15356	0.206099	31	0.00274675	0.0109653	1.95998	0.299373	FALSE
SPNCRNA.1166	HU5mM-40h	1.00284	0.0040865	1.04144	0.0585813	1.02221	0.0316867	1.06394	0.0894122	36	0.914176	0.930501	0.0312832	0.142349	FALSE
SPNCRNA.1166	MMS0.005-40h	0.97411	-0.0378441	1.01161	0.0166507	0.977477	-0.0328658	1.01738	0.0248597	35	0.267919	0.510993	0.291585	0.118532	FALSE
SPNCRNA.1166	MMS0.0075-40h	1.04061	0.0574232	1.08066	0.111918	1.0122	0.0174953	1.05352	0.0752208	35	0.109473	0.337296	0.471989	0.13176	FALSE
SPNCRNA.1166	Rap100ng-40h	1.01328	0.0190297	1.05228	0.0735245	1.0533	0.0749213	1.0963	0.132647	20	0.782389	0.876525	0.0572359	0.212337	FALSE
SPNCRNA.1166	SDS0.001-40h	1.01867	0.0266932	1.05789	0.081188	1.02397	0.0341744	1.06577	0.0918999	36	0.330697	0.409776	0.387453	0.0881216	FALSE
SPNCRNA.1166	SDS0.005-40h	1.0585	0.0820189	1.09925	0.136514	1.05292	0.0743972	1.09591	0.132123	36	0.0113115	0.0621729	1.2064	0.115144	FALSE
SPNCRNA.1166	Sorb1.2M-40h	0.973947	-0.0380851	1.01144	0.0164097	0.961294	-0.0569503	1.00054	0.000775234	4	0.873934	0.905713	0.0430092	0.312699	FALSE
SPNCRNA.1166	TSA500nM-40h	0.940538	-0.0884422	0.976744	-0.0339474	0.886809	-0.173304	0.923012	-0.115579	24	0.201541	0.372412	0.428976	0.221694	FALSE
SPNCRNA.1166	Temp32C-40h	1.00377	0.00543554	1.04242	0.0599303	1.03457	0.0490312	1.0768	0.106757	36	0.850126	0.931434	0.0308477	0.0948784	FALSE
SPNCRNA.1166	Temp37C-40h	1.05703	0.0800139	1.09772	0.134509	0.992084	-0.0114658	1.03258	0.0462597	24	0.0381576	0.0790904	1.10188	0.118298	FALSE
SPNCRNA.1166	Torin5uM-40h	0.945675	-0.0805838	0.982079	-0.026089	0.943352	-0.0841311	0.981863	-0.0264056	36	0.0548621	0.176583	0.753052	0.152922	FALSE
SPNCRNA.1166	VPA3mM-40h	1.06373	0.0891299	1.10468	0.143625	1.0295	0.0419376	1.07152	0.0996632	48	0.00797924	0.0336901	1.4725	0.141457	FALSE
SPNCRNA.1166	VPA5mM-40h	1.06554	0.0915857	1.10656	0.14608	1.04249	0.0600308	1.08505	0.117756	36	0.0625621	0.100452	0.998042	0.198557	FALSE
SPNCRNA.12	Ant0.1ng-40h	0.989758	-0.0148521	1.01063	0.0152485	0.995796	-0.00607768	1.03029	0.0430555	36	0.727797	0.846736	0.0722522	0.145135	FALSE
SPNCRNA.12	Ant1ng-40h	1.07143	0.0995428	1.09402	0.129643	1.08256	0.114449	1.12007	0.163583	36	0.0713202	0.193781	0.712689	0.213012	FALSE
SPNCRNA.12	Bleo20ug-40h	1.02647	0.0376922	1.04811	0.0677928	1.01722	0.0246316	1.05246	0.0737647	20	0.363054	0.47032	0.327607	0.105248	FALSE
SPNCRNA.12	Caff10mM-40h	1.05176	0.0728122	1.07394	0.102913	1.05151	0.0724656	1.08794	0.121599	36	0.107139	0.254454	0.59439	0.162849	FALSE
SPNCRNA.12	Can60ug-40h	1.15984	0.213926	1.18429	0.244027	1.17739	0.235588	1.21817	0.284721	24	0.0241478	0.0598446	1.22297	0.322869	FALSE
SPNCRNA.12	CoCl0.25mM-40h	1.00135	0.00194276	1.02246	0.0320434	1.04219	0.0596216	1.0783	0.108755	12	0.981541	0.986821	0.00576174	0.192729	FALSE
SPNCRNA.12	Diam2mM-40h	1.05587	0.0784261	1.07813	0.108527	1.0818	0.113436	1.11928	0.162569	12	0.378176	0.48991	0.309884	0.20777	FALSE
SPNCRNA.12	EGTA10mM-40h	0.899563	-0.152703	0.918529	-0.122603	0.807074	-0.309227	0.835034	-0.260094	12	0.15475	0.243588	0.613343	0.22665	FALSE
SPNCRNA.12	EMM_Arg-40h	0.965379	-0.0508324	0.985733	-0.0207317	1.03128	0.0444373	1.06701	0.0935705	24	0.599712	0.832753	0.079484	0.314383	FALSE
SPNCRNA.12	EMM_Cyst-40h	1.0931	0.128427	1.11615	0.158527	1.01892	0.0270349	1.05421	0.0761681	11	0.179015	0.402789	0.394922	0.212496	FALSE
SPNCRNA.12	EMM_Gal2-40h	0.982333	-0.0257165	1.00304	0.00438412	0.977829	-0.0323455	1.0117	0.0167877	24	0.60366	0.757929	0.120371	0.145162	FALSE
SPNCRNA.12	EMM_Glu-40h	0.991138	-0.0128415	1.01203	0.0172592	0.994552	-0.00788108	1.02901	0.0412521	36	0.737546	0.839129	0.0761712	0.122036	FALSE
SPNCRNA.12	EMM_Gluc2-40h	0.933507	-0.0992674	0.953188	-0.0691667	0.949898	-0.0741547	0.982806	-0.0250216	12	0.359913	0.63449	0.197575	0.23978	FALSE
SPNCRNA.12	EMM_Gluc3-40h	1.14094	0.190229	1.165	0.22033	1.11023	0.150858	1.14869	0.199991	12	0.00962458	0.0997456	1.00111	0.155921	FALSE
SPNCRNA.12	EMM_Gly3-40h	1.07288	0.101482	1.0955	0.131583	1.01871	0.0267394	1.054	0.0758726	24	0.0704308	0.170832	0.767431	0.175239	FALSE
SPNCRNA.12	EMM_NH4Cl-40h	1	0	1.02108	0.0301007	1	0	1.03464	0.0491332	124	1	1	0	0.196386	FALSE
SPNCRNA.12	EMM_Phe-40h	0.970191	-0.0436586	0.990646	-0.0135579	1.0473	0.0666729	1.08358	0.115806	24	0.591936	0.772193	0.112274	0.261088	FALSE
SPNCRNA.12	EMM_Pro-40h	1.1389	0.187637	1.16291	0.217738	1.14011	0.189178	1.17961	0.238311	35	2.95975e-05	8.87926e-05	4.05162	0.155583	TRUE
SPNCRNA.12	H2O2_0.5mM-40h	1.07942	0.110254	1.10218	0.140355	1.05399	0.0758572	1.0905	0.12499	36	0.00194551	0.0316841	1.49916	0.11055	FALSE
SPNCRNA.12	H2O2_1mM-40h	1.07152	0.0996531	1.09411	0.129754	1.07668	0.10659	1.11398	0.155723	24	0.047471	0.332469	0.478249	0.152025	FALSE
SPNCRNA.12	H2O2_3mM-40h	1.15218	0.204372	1.17648	0.234472	1.10046	0.138106	1.13858	0.187239	24	5.32139e-05	0.00121328	2.91604	0.14509	TRUE
SPNCRNA.12	HU10mM-40h	1.11524	0.157351	1.13875	0.187451	1.20298	0.266614	1.24466	0.315747	24	0.0659604	0.125325	0.901963	0.288261	FALSE
SPNCRNA.12	HU20mM-40h	1.15472	0.207537	1.17906	0.237638	1.18768	0.248151	1.22883	0.297284	20	0.0477427	0.0971905	1.01238	0.326899	FALSE
SPNCRNA.12	HU5mM-40h	1.04198	0.0593266	1.06395	0.0894273	1.07645	0.106279	1.11374	0.155412	36	0.345136	0.517704	0.285919	0.248145	FALSE
SPNCRNA.12	MMS0.005-40h	0.957591	-0.0625186	0.97778	-0.0324179	0.99308	-0.0100176	1.02748	0.0391156	32	0.366758	0.587037	0.231335	0.249209	FALSE
SPNCRNA.12	MMS0.0075-40h	1.04097	0.0579343	1.06292	0.0880349	1.01997	0.0285299	1.05531	0.0776631	23	0.472309	0.708464	0.149682	0.261906	FALSE
SPNCRNA.12	Rap100ng-40h	1.11182	0.152926	1.13526	0.183026	1.06398	0.089471	1.10084	0.138604	36	0.00596873	0.116884	0.932244	0.214494	FALSE
SPNCRNA.12	SDS0.001-40h	1.16835	0.224473	1.19298	0.254574	1.16433	0.219497	1.20466	0.26863	20	9.30198e-05	0.00106043	2.97452	0.151517	TRUE
SPNCRNA.12	SDS0.005-40h	1.00099	0.00142079	1.02209	0.0315214	0.944967	-0.0816638	0.977704	-0.0325306	20	0.989394	0.994663	0.00232397	0.325081	FALSE
SPNCRNA.12	Sorb1.2M-40h	0.976408	-0.0344438	0.996994	-0.00434309	0.952171	-0.0707079	0.985157	-0.0215747	11	0.739564	0.79538	0.0994255	0.22711	FALSE
SPNCRNA.12	TSA500nM-40h	1.02495	0.0355536	1.04656	0.0656543	1.0283	0.0402594	1.06392	0.0893926	24	0.515817	0.654394	0.18416	0.169418	FALSE
SPNCRNA.12	Temp32C-40h	0.975769	-0.0353887	0.996341	-0.00528799	0.974132	-0.0378115	1.00788	0.0113216	28	0.360292	0.696157	0.157293	0.107329	FALSE
SPNCRNA.12	Temp37C-40h	1.05386	0.0756787	1.07608	0.105779	1.05749	0.0806497	1.09413	0.129783	36	0.0813127	0.125265	0.902169	0.153714	FALSE
SPNCRNA.12	Torin5uM-40h	1.01253	0.0179703	1.03388	0.0480709	1.02105	0.0300527	1.05642	0.0791859	24	0.740722	0.879608	0.0557109	0.167019	FALSE
SPNCRNA.12	VPA3mM-40h	1.14912	0.200525	1.17334	0.230626	1.07101	0.0989685	1.10811	0.148102	32	0.0011485	0.00818305	2.08708	0.226527	TRUE
SPNCRNA.12	VPA5mM-40h	1.13548	0.183303	1.15942	0.213404	1.19192	0.253286	1.23321	0.302419	11	0.0538546	0.0889771	1.05072	0.205879	FALSE
SPNCRNA.1249	Ant0.1ng-40h	0.934899	-0.0971171	0.999616	-0.00055379	0.975328	-0.0360402	1.00884	0.0126956	24	0.00019572	0.011156	1.95249	0.0595206	FALSE
SPNCRNA.1249	Ant1ng-40h	0.932423	-0.100943	0.996969	-0.00437967	0.998005	-0.00288072	1.03229	0.045855	36	0.00295885	0.0276048	1.55901	0.116656	FALSE
SPNCRNA.1249	Bleo20ug-40h	0.992578	-0.0107473	1.06129	0.085816	1.01447	0.0207219	1.04932	0.0694577	24	0.628271	0.695368	0.157785	0.0476718	FALSE
SPNCRNA.1249	Caff10mM-40h	0.99132	-0.012578	1.05994	0.0839853	1.01185	0.0169918	1.04661	0.0657276	36	0.764429	0.86705	0.0619558	0.167214	FALSE
SPNCRNA.1249	Can60ug-40h	1.05975	0.0837269	1.13311	0.18029	1.11408	0.155856	1.15236	0.204592	24	0.0161466	0.0471978	1.32608	0.106962	FALSE
SPNCRNA.1249	CoCl0.25mM-40h	0.996582	-0.00493909	1.06557	0.0916242	1.0462	0.0651626	1.08215	0.113898	12	0.90281	0.969219	0.0135782	0.0914371	FALSE
SPNCRNA.1249	Diam2mM-40h	0.938779	-0.0911425	1.00376	0.00542083	1.01538	0.0220188	1.05027	0.0707546	12	0.160321	0.262154	0.581443	0.145502	FALSE
SPNCRNA.1249	EGTA10mM-40h	0.873228	-0.195569	0.933676	-0.099006	0.902713	-0.14766	0.933729	-0.0989245	12	1.64363e-06	6.98542e-05	4.15581	0.0610963	TRUE
SPNCRNA.1249	EMM_Arg-40h									0					FALSE
SPNCRNA.1249	EMM_Cyst-40h	0.982884	-0.0249071	1.05092	0.0716562	1.03233	0.0459063	1.0678	0.0946421	12	0.644934	0.828878	0.0815093	0.126693	FALSE
SPNCRNA.1249	EMM_Gal2-40h	0.968638	-0.0459709	1.03569	0.0505924	1.01431	0.0204979	1.04916	0.0692336	24	0.0992004	0.229285	0.639625	0.0741744	FALSE
SPNCRNA.1249	EMM_Glu-40h	0.998641	-0.00196126	1.06777	0.0946021	1.03464	0.0491232	1.07018	0.0978589	36	0.954272	0.962717	0.0165015	0.129258	FALSE
SPNCRNA.1249	EMM_Gluc2-40h	1.0555	0.0779329	1.12857	0.174496	1.05649	0.0792758	1.09279	0.128012	8	0.184597	0.401019	0.396835	0.110371	FALSE
SPNCRNA.1249	EMM_Gluc3-40h	0.985978	-0.0203723	1.05423	0.0761911	1.01337	0.0191608	1.04819	0.0678965	16	0.509552	0.801368	0.096168	0.0730187	FALSE
SPNCRNA.1249	EMM_Gly3-40h	0.968468	-0.0462243	1.03551	0.050339	1.01079	0.0154817	1.04552	0.0642175	12	0.270164	0.385837	0.413597	0.0918053	FALSE
SPNCRNA.1249	EMM_NH4Cl-40h	1	0	1.06922	0.0965633	1	0	1.03436	0.0487357	128	1	1	0	0.148594	FALSE
SPNCRNA.1249	EMM_Phe-40h	0.934677	-0.0974606	0.999378	-0.000897277	0.994902	-0.0073743	1.02908	0.0413614	28	0.0133982	0.0587457	1.23102	0.125632	FALSE
SPNCRNA.1249	EMM_Pro-40h	0.927854	-0.108031	0.992083	-0.0114672	0.920303	-0.119819	0.951923	-0.0710829	16	0.221693	0.328221	0.483833	0.23721	FALSE
SPNCRNA.1249	H2O2_0.5mM-40h	1.01968	0.0281193	1.09027	0.124683	1.02098	0.029953	1.05606	0.0786887	28	0.428625	0.610791	0.214108	0.120907	FALSE
SPNCRNA.1249	H2O2_1mM-40h	0.99121	-0.0127378	1.05982	0.0838255	1.00847	0.0121671	1.04312	0.0609028	24	0.666629	0.843681	0.0738218	0.0846159	FALSE
SPNCRNA.1249	H2O2_3mM-40h	0.983855	-0.0234825	1.05196	0.0730808	1.00193	0.00278186	1.03635	0.0515176	16	0.570422	0.699227	0.155382	0.107814	FALSE
SPNCRNA.1249	HU10mM-40h	1.07314	0.101844	1.14743	0.198407	1.03537	0.0501526	1.07095	0.0988884	35	0.0912057	0.16246	0.789253	0.25587	FALSE
SPNCRNA.1249	HU20mM-40h	1.02257	0.0322036	1.09336	0.128767	1.03879	0.0549053	1.07448	0.103641	31	0.511717	0.656547	0.182734	0.189307	FALSE
SPNCRNA.1249	HU5mM-40h	0.939094	-0.0906579	1.0041	0.00590546	0.985119	-0.0216298	1.01897	0.0271059	36	0.000464344	0.00378109	2.42238	0.074526	FALSE
SPNCRNA.1249	MMS0.005-40h	1.00566	0.00814154	1.07527	0.104705	1.04091	0.0578521	1.07668	0.106588	35	0.694751	0.808179	0.0924922	0.047476	FALSE
SPNCRNA.1249	MMS0.0075-40h	0.986203	-0.0200437	1.05447	0.0765196	1.0147	0.0210478	1.04956	0.0697835	35	0.539688	0.741258	0.130031	0.118341	FALSE
SPNCRNA.1249	Rap100ng-40h	1.01216	0.0174346	1.08222	0.113998	1.0727	0.10124	1.10955	0.149976	20	0.608334	0.779214	0.108343	0.0958694	FALSE
SPNCRNA.1249	SDS0.001-40h	1.00776	0.0111503	1.07752	0.107714	1.01992	0.0284605	1.05497	0.0771962	35	0.659236	0.698343	0.155931	0.0792411	FALSE
SPNCRNA.1249	SDS0.005-40h	0.966125	-0.0497186	1.033	0.0468447	1.00505	0.00726011	1.03958	0.0559959	35	0.0753079	0.245289	0.610323	0.0902405	FALSE
SPNCRNA.1249	Sorb1.2M-40h	0.924253	-0.11364	0.988233	-0.0170767	0.929894	-0.104862	0.961843	-0.0561267	4	0.145902	0.286772	0.542463	0.0836595	FALSE
SPNCRNA.1249	TSA500nM-40h	0.914448	-0.129028	0.977749	-0.0324643	0.948199	-0.0767379	0.980778	-0.0280022	24	0.000942778	0.00667801	2.17535	0.108078	TRUE
SPNCRNA.1249	Temp32C-40h	0.997767	-0.00322498	1.06684	0.0933383	1.04897	0.0689721	1.08501	0.117708	36	0.918772	0.952182	0.02128	0.115673	FALSE
SPNCRNA.1249	Temp37C-40h	0.996232	-0.00544602	1.06519	0.0911173	0.977913	-0.0322217	1.01151	0.016514	24	0.871619	0.879332	0.0558471	0.102952	FALSE
SPNCRNA.1249	Torin5uM-40h	0.955801	-0.0652184	1.02196	0.0313449	0.993717	-0.00909353	1.02786	0.0396422	36	0.0662183	0.204024	0.690319	0.129619	FALSE
SPNCRNA.1249	VPA3mM-40h	0.941769	-0.0865551	1.00696	0.0100082	0.967817	-0.0471936	1.00107	0.00154215	48	0.00919357	0.037431	1.42677	0.134199	FALSE
SPNCRNA.1249	VPA5mM-40h	0.952308	-0.0704996	1.01823	0.0260637	1.00162	0.00233521	1.03603	0.0510709	35	0.15389	0.230836	0.636697	0.192994	FALSE
SPNCRNA.1255	Ant0.1ng-40h	0.94729	-0.0781212	0.981638	-0.0267375	0.959071	-0.0602901	0.979964	-0.0291987	21	0.3602	0.595114	0.2254	0.26207	FALSE
SPNCRNA.1255	Ant1ng-40h	0.975378	-0.0359669	1.01074	0.0154168	0.987585	-0.0180232	1.0091	0.0130682	36	0.0977976	0.237211	0.624865	0.0568326	FALSE
SPNCRNA.1255	Bleo20ug-40h	0.966683	-0.0488859	1.00173	0.0024978	1.01309	0.0187643	1.03516	0.0498558	24	0.205449	0.312283	0.505452	0.11717	FALSE
SPNCRNA.1255	Caff10mM-40h	0.982491	-0.0254837	1.01811	0.0259	0.962935	-0.05449	0.983912	-0.0233986	36	0.578672	0.794802	0.099741	0.180798	FALSE
SPNCRNA.1255	Can60ug-40h	1.11499	0.157029	1.15542	0.208413	1.14383	0.193875	1.16875	0.224967	24	4.0361e-06	4.34419e-05	4.36209	0.0937884	TRUE
SPNCRNA.1255	CoCl0.25mM-40h	1.03003	0.0426866	1.06738	0.0940703	1.0701	0.0977412	1.09341	0.128833	12	0.286084	0.562302	0.25003	0.0884318	FALSE
SPNCRNA.1255	Diam2mM-40h	1.07083	0.0987234	1.10965	0.150107	1.09748	0.1342	1.12139	0.165292	12	0.00302364	0.0149867	1.82429	0.0639221	FALSE
SPNCRNA.1255	EGTA10mM-40h	1.03204	0.0454998	1.06946	0.0968835	1.0626	0.0875995	1.08575	0.118691	12	0.635408	0.729861	0.13676	0.23259	FALSE
SPNCRNA.1255	EMM_Arg-40h									0					FALSE
SPNCRNA.1255	EMM_Cyst-40h	1.03914	0.055389	1.07682	0.106773	1.05137	0.072266	1.07427	0.103357	12	0.13013	0.336149	0.473468	0.0781782	FALSE
SPNCRNA.1255	EMM_Gal2-40h	1.04012	0.0567549	1.07784	0.108139	1.0121	0.0173582	1.03415	0.0484497	19	0.455134	0.614198	0.211691	0.232064	FALSE
SPNCRNA.1255	EMM_Glu-40h	0.986989	-0.0188938	1.02278	0.0324899	1.02247	0.0320594	1.04474	0.0631508	36	0.473663	0.683514	0.165253	0.0862129	FALSE
SPNCRNA.1255	EMM_Gluc2-40h	0.921513	-0.117923	0.954926	-0.0665392	0.983472	-0.0240447	1.0049	0.00704676	8	0.108245	0.293808	0.531937	0.122843	FALSE
SPNCRNA.1255	EMM_Gluc3-40h	0.998681	-0.00190476	1.03489	0.049479	1.04289	0.0605845	1.06561	0.0916759	16	0.95944	0.963659	0.0160764	0.0949042	FALSE
SPNCRNA.1255	EMM_Gly3-40h	0.969355	-0.0449031	1.0045	0.00648059	0.974122	-0.037826	0.995343	-0.00673458	12	0.0730531	0.173501	0.760698	0.0427699	FALSE
SPNCRNA.1255	EMM_NH4Cl-40h	1	0	1.03626	0.0513837	1	0	1.02178	0.0310914	128	1	1	0	0.136046	FALSE
SPNCRNA.1255	EMM_Phe-40h	0.962741	-0.0547804	0.997648	-0.00339669	1.00191	0.00275805	1.02374	0.0338495	28	0.182162	0.377573	0.422999	0.136335	FALSE
SPNCRNA.1255	EMM_Pro-40h	1.04155	0.0587261	1.07931	0.11011	0.917313	-0.124514	0.937297	-0.0934225	16	0.580772	0.682557	0.165861	0.301592	FALSE
SPNCRNA.1255	H2O2_0.5mM-40h	1.01304	0.0186882	1.04977	0.0700719	1.00786	0.0112943	1.02982	0.0423857	28	0.646091	0.783557	0.105929	0.140763	FALSE
SPNCRNA.1255	H2O2_1mM-40h	0.970691	-0.0429166	1.00589	0.00846707	0.977772	-0.0324293	0.999073	-0.00133791	24	0.135914	0.499811	0.301194	0.0786488	FALSE
SPNCRNA.1255	H2O2_3mM-40h	0.935094	-0.0968174	0.968998	-0.0454337	0.880039	-0.18436	0.899211	-0.153268	16	0.113731	0.235734	0.627579	0.15453	FALSE
SPNCRNA.1255	HU10mM-40h	1.03525	0.0499819	1.07279	0.101366	1.06104	0.0854791	1.08415	0.116571	36	0.106637	0.181154	0.741951	0.112916	FALSE
SPNCRNA.1255	HU20mM-40h	1.04035	0.0570651	1.07807	0.108449	1.09894	0.136108	1.12288	0.167199	32	0.148349	0.241596	0.61691	0.145761	FALSE
SPNCRNA.1255	HU5mM-40h	0.976729	-0.0339705	1.01214	0.0174132	0.997263	-0.00395396	1.01899	0.0271375	36	0.149487	0.325229	0.487811	0.0688353	FALSE
SPNCRNA.1255	MMS0.005-40h	1.00349	0.00502148	1.03987	0.0564052	1.02523	0.0359534	1.04757	0.0670449	36	0.834276	0.914495	0.0388188	0.074016	FALSE
SPNCRNA.1255	MMS0.0075-40h	0.978404	-0.0314981	1.01388	0.0198856	0.992501	-0.0108597	1.01412	0.0202318	36	0.292078	0.54585	0.262926	0.103928	FALSE
SPNCRNA.1255	Rap100ng-40h	0.938861	-0.0910162	0.972903	-0.0396325	0.883353	-0.178937	0.902597	-0.147846	17	0.32034	0.649102	0.187687	0.250445	FALSE
SPNCRNA.1255	SDS0.001-40h	0.974225	-0.0376725	1.00955	0.0137112	1.03271	0.0464307	1.0552	0.0775221	36	0.339695	0.4164	0.380489	0.14985	FALSE
SPNCRNA.1255	SDS0.005-40h	1.01236	0.0177164	1.04906	0.0691001	1.01241	0.0177954	1.03447	0.0488868	36	0.496803	0.735527	0.133401	0.0864328	FALSE
SPNCRNA.1255	Sorb1.2M-40h	0.984904	-0.0219451	1.02061	0.0294386	1.01937	0.0276778	1.04158	0.0587692	4	0.605322	0.697038	0.156744	0.0509621	FALSE
SPNCRNA.1255	TSA500nM-40h	0.993173	-0.00988268	1.02918	0.041501	1.0005	0.000718581	1.02229	0.03181	18	0.81602	0.889252	0.050975	0.116943	FALSE
SPNCRNA.1255	Temp32C-40h	0.992559	-0.0107752	1.02855	0.0406085	1.01821	0.0260388	1.04039	0.0571302	36	0.686668	0.889697	0.0507577	0.0886585	FALSE
SPNCRNA.1255	Temp37C-40h	1.05179	0.0728442	1.08992	0.124228	1.06735	0.0940362	1.0906	0.125128	24	0.0891462	0.130291	0.885087	0.1379	FALSE
SPNCRNA.1255	Torin5uM-40h	1.03518	0.0498794	1.07271	0.101263	1.06469	0.0904361	1.08789	0.121528	36	0.0375473	0.14268	0.845638	0.0746818	FALSE
SPNCRNA.1255	VPA3mM-40h	0.933094	-0.0999058	0.966926	-0.0485221	0.949089	-0.075384	0.969765	-0.0442926	48	0.00239532	0.0124121	1.90615	0.129107	FALSE
SPNCRNA.1255	VPA5mM-40h	0.983402	-0.0241466	1.01906	0.0272371	1.02454	0.0349744	1.04686	0.0660658	35	0.457279	0.554573	0.256042	0.11595	FALSE
SPNCRNA.130	Ant0.1ng-40h	1.00736	0.0105753	1.07196	0.100247	1.0087	0.0124997	1.07252	0.101003	35	0.603847	0.79267	0.100908	0.06396	FALSE
SPNCRNA.130	Ant1ng-40h	0.989673	-0.0149758	1.05314	0.0746961	1.00243	0.00349463	1.06585	0.0919982	36	0.453805	0.623299	0.205304	0.0612873	FALSE
SPNCRNA.130	Bleo20ug-40h	1.04048	0.0572501	1.1072	0.146922	1.05809	0.0814686	1.12504	0.169972	20	0.0626522	0.129861	0.886521	0.0880912	FALSE
SPNCRNA.130	Caff10mM-40h	1.06515	0.0910544	1.13345	0.180726	1.05884	0.0824808	1.12583	0.170984	36	7.7977e-05	0.00126991	2.89623	0.0780694	TRUE
SPNCRNA.130	Can60ug-40h	1.0473	0.0666692	1.11446	0.156341	1.06232	0.0872227	1.12953	0.175726	24	0.0508886	0.107431	0.968868	0.110474	FALSE
SPNCRNA.130	CoCl0.25mM-40h	1.04476	0.0631654	1.11175	0.152837	1.04483	0.0632741	1.11094	0.151778	12	0.00477738	0.0605135	1.21815	0.0407968	FALSE
SPNCRNA.130	Diam2mM-40h	1.05723	0.0802886	1.12503	0.169961	1.05411	0.0760278	1.1208	0.164531	12	4.4456e-05	0.000633498	3.19825	0.030665	TRUE
SPNCRNA.130	EGTA10mM-40h	1.07997	0.110986	1.14922	0.200657	1.09078	0.125358	1.15979	0.213862	12	0.0240615	0.065489	1.18383	0.110213	FALSE
SPNCRNA.130	EMM_Arg-40h	0.892804	-0.163584	0.950058	-0.0739124	0.903079	-0.147076	0.960214	-0.0585726	23	4.19239e-05	0.000497847	3.3029	0.10447	TRUE
SPNCRNA.130	EMM_Cyst-40h	1.09769	0.134465	1.16808	0.224137	1.07781	0.108109	1.146	0.196613	12	6.9081e-05	0.000845289	3.07299	0.0618872	TRUE
SPNCRNA.130	EMM_Gal2-40h	1.0057	0.00820507	1.0702	0.097877	1.01766	0.025251	1.08204	0.113755	24	0.745862	0.83448	0.0785843	0.075456	FALSE
SPNCRNA.130	EMM_Glu-40h	0.982669	-0.0252221	1.04569	0.0644498	0.97085	-0.0426789	1.03227	0.0458246	36	0.277825	0.565473	0.247588	0.0795187	FALSE
SPNCRNA.130	EMM_Gluc2-40h	1.02752	0.0391731	1.09342	0.128845	1.02073	0.0295958	1.0853	0.118099	12	0.0990297	0.282235	0.54939	0.0470647	FALSE
SPNCRNA.130	EMM_Gluc3-40h	1.01801	0.0257472	1.08329	0.115419	1.02422	0.0345203	1.08902	0.123024	12	0.35786	0.679934	0.167533	0.0605194	FALSE
SPNCRNA.130	EMM_Gly3-40h	1.0622	0.0870563	1.13032	0.176728	1.05916	0.0829222	1.12617	0.171426	24	2.72838e-05	0.000622071	3.20616	0.051516	TRUE
SPNCRNA.130	EMM_NH4Cl-40h	1	0	1.06413	0.0896719	1	0	1.06327	0.0885036	123	1	1	0	0.115983	FALSE
SPNCRNA.130	EMM_Phe-40h	1.04005	0.0566582	1.10675	0.14633	1.04602	0.0649075	1.1122	0.153411	24	0.00623099	0.0327492	1.4848	0.0535604	FALSE
SPNCRNA.130	EMM_Pro-40h	1.12182	0.16584	1.19376	0.255512	1.10807	0.148045	1.17817	0.236548	36	1.181e-09	4.48779e-08	7.34797	0.0917172	TRUE
SPNCRNA.130	H2O2_0.5mM-40h	1.04215	0.0595647	1.10898	0.149237	1.04678	0.0659588	1.11301	0.154462	36	0.0839122	0.227905	0.642247	0.139111	FALSE
SPNCRNA.130	H2O2_1mM-40h	1.03282	0.0465859	1.09905	0.136258	1.04463	0.0629897	1.11072	0.151493	24	0.126896	0.498832	0.302045	0.0968495	FALSE
SPNCRNA.130	H2O2_3mM-40h	1.05763	0.0808341	1.12545	0.170506	1.05166	0.0726689	1.1182	0.161173	24	0.00602389	0.0274689	1.56116	0.0899387	FALSE
SPNCRNA.130	HU10mM-40h	1.12915	0.175232	1.20156	0.264904	1.17284	0.23001	1.24705	0.318514	24	9.38068e-05	0.000534699	3.27189	0.139959	TRUE
SPNCRNA.130	HU20mM-40h	1.10408	0.142849	1.17489	0.232521	1.11991	0.163381	1.19076	0.251885	20	0.0129301	0.0350961	1.45474	0.176833	FALSE
SPNCRNA.130	HU5mM-40h	1.08281	0.114776	1.15225	0.204448	1.07799	0.10835	1.1462	0.196853	36	2.20993e-08	1.25966e-06	5.89975	0.0613206	TRUE
SPNCRNA.130	MMS0.005-40h	1.01272	0.0182347	1.07766	0.107907	1.01361	0.0195081	1.07774	0.108012	32	0.43002	0.612805	0.212677	0.076219	FALSE
SPNCRNA.130	MMS0.0075-40h	1.04793	0.0675478	1.11514	0.15722	1.06666	0.0930973	1.13414	0.181601	24	0.0244654	0.128221	0.892042	0.0935689	FALSE
SPNCRNA.130	Rap100ng-40h	0.98098	-0.027705	1.04389	0.0619669	0.979218	-0.0302979	1.04117	0.0582057	34	0.186847	0.507157	0.294858	0.0645259	FALSE
SPNCRNA.130	SDS0.001-40h	1.09994	0.137423	1.17048	0.227095	1.10009	0.137625	1.16969	0.226129	20	1.36514e-06	4.94156e-05	4.30614	0.0691823	TRUE
SPNCRNA.130	SDS0.005-40h	0.990371	-0.0139589	1.05388	0.075713	1.01802	0.0257725	1.08243	0.114276	20	0.770781	0.932814	0.0302047	0.148223	FALSE
SPNCRNA.130	Sorb1.2M-40h	0.946513	-0.0793051	1.00721	0.0103668	0.997973	-0.00292725	1.06111	0.0855763	12	0.261251	0.431238	0.365283	0.163335	FALSE
SPNCRNA.130	TSA500nM-40h	1.04074	0.0576095	1.10748	0.147281	1.02448	0.0348918	1.0893	0.123395	24	0.0239246	0.0726283	1.13889	0.0752319	FALSE
SPNCRNA.130	Temp32C-40h	0.958627	-0.0609586	1.0201	0.0287133	0.974221	-0.0376796	1.03586	0.050824	28	0.0216124	0.262802	0.580372	0.0815205	FALSE
SPNCRNA.130	Temp37C-40h	1.03051	0.0433637	1.0966	0.133036	1.03668	0.0519751	1.10227	0.140479	36	0.104888	0.149465	0.825461	0.100476	FALSE
SPNCRNA.130	Torin5uM-40h	1.03905	0.0552629	1.10568	0.144935	1.03986	0.0563921	1.10565	0.144896	24	0.0111437	0.0747282	1.12652	0.0586672	FALSE
SPNCRNA.130	VPA3mM-40h	1.02562	0.0364903	1.09139	0.126162	1.03902	0.0552231	1.10476	0.143727	32	0.302571	0.459907	0.33733	0.135443	FALSE
SPNCRNA.130	VPA5mM-40h	1.10014	0.137682	1.17069	0.227354	1.11155	0.152579	1.18188	0.241082	12	0.000345813	0.001596	2.79697	0.0741872	TRUE
SPNCRNA.1306	Ant0.1ng-40h	0.964797	-0.0517021	0.950314	-0.0735241	0.945566	-0.0807492	0.952879	-0.0696356	35	0.316528	0.555141	0.255597	0.162806	FALSE
SPNCRNA.1306	Ant1ng-40h	0.939547	-0.0899623	0.925443	-0.111784	0.940737	-0.0881374	0.948011	-0.0770237	36	0.0642597	0.18314	0.737217	0.145114	FALSE
SPNCRNA.1306	Bleo20ug-40h	0.92762	-0.108395	0.913694	-0.130217	0.934438	-0.0978295	0.941664	-0.0867158	14	0.0903406	0.174556	0.758064	0.129821	FALSE
SPNCRNA.1306	Caff10mM-40h	0.986244	-0.0199832	0.971439	-0.0418052	1.06318	0.0883821	1.0714	0.0994958	35	0.752625	0.86666	0.0621515	0.221732	FALSE
SPNCRNA.1306	Can60ug-40h	1.00364	0.00524453	0.988575	-0.0165775	1.0297	0.0422179	1.03766	0.0533316	24	0.940619	0.948944	0.0227596	0.211278	FALSE
SPNCRNA.1306	CoCl0.25mM-40h	1.02587	0.036845	1.01047	0.015023	0.983931	-0.0233715	0.99154	-0.0122578	12	0.585451	0.844828	0.0732315	0.141798	FALSE
SPNCRNA.1306	Diam2mM-40h	0.948755	-0.0758919	0.934513	-0.0977139	0.954364	-0.0673883	0.961744	-0.0562747	12	0.218642	0.336827	0.472593	0.117768	FALSE
SPNCRNA.1306	EGTA10mM-40h	0.952068	-0.0708629	0.937776	-0.0926849	0.962107	-0.0557305	0.969547	-0.0446168	12	0.539544	0.664655	0.177404	0.249456	FALSE
SPNCRNA.1306	EMM_Arg-40h	0.869619	-0.201544	0.856564	-0.223366	0.813446	-0.297882	0.819736	-0.286768	22	0.00605855	0.0239818	1.62012	0.181662	FALSE
SPNCRNA.1306	EMM_Cyst-40h	1.06235	0.0872532	1.0464	0.0654312	1.05546	0.077876	1.06363	0.0889896	12	0.585649	0.794809	0.099737	0.372796	FALSE
SPNCRNA.1306	EMM_Gal2-40h	1.00243	0.00349475	0.987377	-0.0183272	0.972114	-0.0408026	0.979631	-0.029689	24	0.935914	0.974956	0.0110148	0.104081	FALSE
SPNCRNA.1306	EMM_Glu-40h	1.03833	0.0542682	1.02274	0.0324462	1.06201	0.0867999	1.07022	0.0979135	36	0.272274	0.565473	0.247588	0.163325	FALSE
SPNCRNA.1306	EMM_Gluc2-40h	0.944239	-0.0827757	0.930064	-0.104598	0.915944	-0.126669	0.923027	-0.115555	12	0.310599	0.585463	0.232501	0.166792	FALSE
SPNCRNA.1306	EMM_Gluc3-40h	0.775758	-0.366322	0.764112	-0.388144	0.835369	-0.259514	0.841829	-0.2484	12	0.0320407	0.202925	0.692665	0.308092	FALSE
SPNCRNA.1306	EMM_Gly3-40h	0.94313	-0.0844713	0.928972	-0.106293	0.946031	-0.0800411	0.953347	-0.0689274	15	0.229231	0.372707	0.428633	0.156208	FALSE
SPNCRNA.1306	EMM_NH4Cl-40h	1	0	0.984988	-0.021822	1	0	1.00773	0.0111137	118	1	1	0	0.224036	FALSE
SPNCRNA.1306	EMM_Phe-40h	0.974457	-0.037329	0.959829	-0.059151	0.9025	-0.148001	0.909479	-0.136888	24	0.577875	0.772193	0.112274	0.194865	FALSE
SPNCRNA.1306	EMM_Pro-40h	1.21258	0.278084	1.19438	0.256262	1.17198	0.228951	1.18105	0.240065	36	9.79678e-05	0.000248185	3.60522	0.269973	TRUE
SPNCRNA.1306	H2O2_0.5mM-40h	1.05358	0.0753043	1.03777	0.0534823	1.06243	0.0873628	1.07064	0.0984764	36	0.136922	0.284383	0.546096	0.17046	FALSE
SPNCRNA.1306	H2O2_1mM-40h	1.04964	0.0698956	1.03388	0.0480736	1.01244	0.0178362	1.02027	0.0289498	24	0.321908	0.713201	0.146788	0.215807	FALSE
SPNCRNA.1306	H2O2_3mM-40h	1.04201	0.0593655	1.02636	0.0375435	1.04565	0.0644027	1.05374	0.0755164	24	0.404431	0.554051	0.25645	0.217772	FALSE
SPNCRNA.1306	HU10mM-40h	1.09893	0.1361	1.08243	0.114278	1.0634	0.0886889	1.07163	0.0998026	24	0.0265713	0.0593946	1.22625	0.180753	FALSE
SPNCRNA.1306	HU20mM-40h	1.11727	0.159983	1.1005	0.138161	1.06155	0.0861707	1.06976	0.0972844	19	0.00848148	0.024792	1.60569	0.155167	FALSE
SPNCRNA.1306	HU5mM-40h	0.98567	-0.020823	0.970873	-0.042645	1.00726	0.0104386	1.01505	0.0215523	36	0.739179	0.802537	0.0955351	0.220856	FALSE
SPNCRNA.1306	MMS0.005-40h	0.921491	-0.117958	0.907658	-0.13978	0.905277	-0.143569	0.912278	-0.132455	32	0.0686287	0.30596	0.514335	0.2044	FALSE
SPNCRNA.1306	MMS0.0075-40h	0.935826	-0.0956876	0.921777	-0.11751	0.918521	-0.122615	0.925624	-0.111501	24	0.0848368	0.293073	0.533025	0.144162	FALSE
SPNCRNA.1306	Rap100ng-40h	0.929768	-0.105057	0.91581	-0.126879	0.853361	-0.228772	0.85996	-0.217658	36	0.116617	0.428848	0.367697	0.229228	FALSE
SPNCRNA.1306	SDS0.001-40h	1.03268	0.0463928	1.01718	0.0245708	1.0309	0.043898	1.03887	0.0550117	20	0.539666	0.597621	0.223574	0.212542	FALSE
SPNCRNA.1306	SDS0.005-40h	0.963256	-0.0540087	0.948796	-0.0758307	0.978702	-0.0310592	0.98627	-0.0199455	20	0.209677	0.482762	0.316267	0.0885052	FALSE
SPNCRNA.1306	Sorb1.2M-40h	1.06412	0.0896665	1.04815	0.0678445	1.05194	0.0730545	1.06008	0.0841682	11	0.0455793	0.133232	0.875392	0.073962	FALSE
SPNCRNA.1306	TSA500nM-40h	0.985392	-0.0212299	0.9706	-0.0430519	1.00511	0.00735401	1.01288	0.0184677	24	0.696913	0.789835	0.102463	0.148814	FALSE
SPNCRNA.1306	Temp32C-40h	0.985818	-0.0206064	0.971019	-0.0424284	1.00804	0.0115466	1.01583	0.0226603	28	0.745093	0.889697	0.0507577	0.197857	FALSE
SPNCRNA.1306	Temp37C-40h	1.07664	0.10653	1.06047	0.0847083	1.1128	0.154188	1.1214	0.165302	36	0.0428079	0.0871446	1.05976	0.181363	FALSE
SPNCRNA.1306	Torin5uM-40h	1.01108	0.0158917	0.995898	-0.00593029	1.01036	0.0148747	1.01818	0.0259884	23	0.828796	0.93501	0.0291837	0.218632	FALSE
SPNCRNA.1306	VPA3mM-40h	1.03088	0.0438756	1.0154	0.0220536	1.08567	0.11859	1.09407	0.129704	32	0.496676	0.643421	0.191505	0.222526	FALSE
SPNCRNA.1306	VPA5mM-40h	1.40426	0.489807	1.38318	0.467985	1.38351	0.468334	1.39421	0.479448	12	0.000967737	0.00315868	2.50049	0.311446	TRUE
SPNCRNA.1326	Ant0.1ng-40h	0.960887	-0.0575609	0.973654	-0.0385196	0.931504	-0.102366	0.96306	-0.0543028	12	0.128431	0.305023	0.515667	0.0509664	FALSE
SPNCRNA.1326	Ant1ng-40h	1.04368	0.0616775	1.05754	0.0807187	0.985676	-0.0208152	1.01907	0.0272481	15	0.268372	0.456632	0.340433	0.127744	FALSE
SPNCRNA.1326	Bleo20ug-40h	0.801752	-0.318772	0.812404	-0.29973	0.852928	-0.229504	0.881822	-0.18144	12	0.00115275	0.00876089	2.05745	0.160302	TRUE
SPNCRNA.1326	Caff10mM-40h	1.05894	0.0826243	1.07301	0.101666	1.0332	0.0471173	1.0682	0.0951806	12	0.00928068	0.0503809	1.29773	0.0266275	FALSE
SPNCRNA.1326	Can60ug-40h	0.997929	-0.00299093	1.01119	0.0160504	1.00006	8.59187e-05	1.03394	0.0481492	32	0.956669	0.956669	0.0192381	0.181829	FALSE
SPNCRNA.1326	CoCl0.25mM-40h	0.901914	-0.148938	0.913897	-0.129896	0.929705	-0.105154	0.9612	-0.057091	24	0.0578724	0.280431	0.552174	0.225239	FALSE
SPNCRNA.1326	Diam2mM-40h	0.967037	-0.0483569	0.979885	-0.0293156	0.921518	-0.117916	0.952735	-0.0698527	12	0.451557	0.565686	0.247424	0.131485	FALSE
SPNCRNA.1326	EGTA10mM-40h									0					FALSE
SPNCRNA.1326	EMM_Arg-40h	1.18583	0.245897	1.20158	0.264938	1.12231	0.166477	1.16033	0.21454	4	0.176825	0.423768	0.372872	0.214589	FALSE
SPNCRNA.1326	EMM_Cyst-40h	1.09408	0.129715	1.10861	0.148756	1.04446	0.0627533	1.07984	0.110817	4	0.124329	0.329616	0.481992	0.0913295	FALSE
SPNCRNA.1326	EMM_Gal2-40h	0.963224	-0.0540567	0.976021	-0.0350154	0.927374	-0.108777	0.95879	-0.0607132	12	0.249401	0.415414	0.381518	0.0822411	FALSE
SPNCRNA.1326	EMM_Glu-40h	1.02649	0.0377224	1.04013	0.0567637	0.958459	-0.061212	0.990927	-0.0131487	23	0.396412	0.594618	0.225762	0.11166	FALSE
SPNCRNA.1326	EMM_Gluc2-40h	0.851858	-0.231315	0.863176	-0.212274	0.925595	-0.111547	0.95695	-0.0634839	12	0.095428	0.282235	0.54939	0.278977	FALSE
SPNCRNA.1326	EMM_Gluc3-40h	0.909991	-0.136076	0.922081	-0.117034	0.874871	-0.192858	0.904508	-0.144795	16	0.184479	0.438137	0.35839	0.250827	FALSE
SPNCRNA.1326	EMM_Gly3-40h	0.895288	-0.159576	0.907183	-0.140534	0.908276	-0.138797	0.939045	-0.090734	4	0.260038	0.380055	0.420153	0.152201	FALSE
SPNCRNA.1326	EMM_NH4Cl-40h	1	0	1.01329	0.0190413	1	0	1.03388	0.0480633	82	1	1	0	0.191236	FALSE
SPNCRNA.1326	EMM_Phe-40h	0.960393	-0.058303	0.973153	-0.0392617	0.960796	-0.0576987	0.993344	-0.00963538	12	0.433925	0.631482	0.199639	0.157051	FALSE
SPNCRNA.1326	EMM_Pro-40h	1.05835	0.0818142	1.07241	0.100856	1.04412	0.0622815	1.07949	0.110345	12	0.0131745	0.0262	1.5817	0.0346627	FALSE
SPNCRNA.1326	H2O2_0.5mM-40h	1.00506	0.00728487	1.01842	0.0263262	0.992435	-0.0109554	1.02605	0.0371079	12	0.831913	0.870074	0.0604439	0.0401559	FALSE
SPNCRNA.1326	H2O2_1mM-40h	1.00652	0.00937607	1.01989	0.0284174	0.965254	-0.0510198	0.997953	-0.00295647	16	0.814956	0.908971	0.0414502	0.0741875	FALSE
SPNCRNA.1326	H2O2_3mM-40h	0.979157	-0.0303885	0.992166	-0.0113472	0.968386	-0.0463455	1.00119	0.0017178	12	0.457226	0.579153	0.237207	0.0646039	FALSE
SPNCRNA.1326	HU10mM-40h	0.987145	-0.0186662	1.00026	0.0003751	0.9706	-0.0430507	1.00348	0.00501258	34	0.65255	0.78306	0.106205	0.114562	FALSE
SPNCRNA.1326	HU20mM-40h	0.993383	-0.0095781	1.00658	0.00946319	0.996339	-0.00529183	1.03009	0.0427715	30	0.839703	0.911677	0.0401589	0.139078	FALSE
SPNCRNA.1326	HU5mM-40h	1.02094	0.0298944	1.0345	0.0489357	1.00577	0.00830593	1.03985	0.0563692	36	0.436999	0.600215	0.221693	0.102819	FALSE
SPNCRNA.1326	MMS0.005-40h	0.946162	-0.0798406	0.958733	-0.0607993	0.94387	-0.0833397	0.975845	-0.0352764	36	0.172417	0.436667	0.35985	0.200529	FALSE
SPNCRNA.1326	MMS0.0075-40h	0.983777	-0.0235962	0.996848	-0.00455492	0.94599	-0.0801029	0.978037	-0.0320396	36	0.584627	0.748849	0.125606	0.1276	FALSE
SPNCRNA.1326	Rap100ng-40h	0.979731	-0.0295429	0.992747	-0.0105016	0.929007	-0.106239	0.960478	-0.058176	28	0.724482	0.860323	0.0653387	0.284771	FALSE
SPNCRNA.1326	SDS0.001-40h	0.978653	-0.0311301	0.991656	-0.0120888	0.979178	-0.0303563	1.01235	0.017707	36	0.465963	0.531778	0.27427	0.124051	FALSE
SPNCRNA.1326	SDS0.005-40h	1.01705	0.0243932	1.03056	0.0434345	0.995543	-0.0064442	1.02927	0.0416191	27	0.585672	0.807777	0.0927083	0.121801	FALSE
SPNCRNA.1326	Sorb1.2M-40h	0.931813	-0.101888	0.944193	-0.0828465	0.924768	-0.112837	0.956095	-0.0647741	11	0.18745	0.331038	0.480122	0.150243	FALSE
SPNCRNA.1326	TSA500nM-40h									0					FALSE
SPNCRNA.1326	Temp32C-40h	1.01396	0.0199945	1.02743	0.0390358	0.958368	-0.061349	0.990833	-0.0132857	23	0.662156	0.888068	0.0515538	0.116574	FALSE
SPNCRNA.1326	Temp37C-40h	1.06356	0.0889007	1.07769	0.107942	0.9977	-0.00332228	1.0315	0.044741	20	0.0597081	0.104719	0.979975	0.115669	FALSE
SPNCRNA.1326	Torin5uM-40h	0.948668	-0.0760246	0.961272	-0.0569833	0.991088	-0.0129151	1.02466	0.0351482	18	0.174921	0.390999	0.407824	0.131778	FALSE
SPNCRNA.1326	VPA3mM-40h	1.05987	0.0838887	1.07395	0.10293	0.987734	-0.0178052	1.02119	0.0302581	8	0.238627	0.391249	0.407547	0.12374	FALSE
SPNCRNA.1326	VPA5mM-40h	1.12922	0.175322	1.14422	0.194364	1.10425	0.143067	1.14166	0.191131	12	0.000117225	0.000581029	3.2358	0.075681	TRUE
SPNCRNA.1341	Ant0.1ng-40h	0.977666	-0.0325864	1.0367	0.051992	0.983624	-0.0238211	1.03216	0.045661	36	0.327857	0.566299	0.246954	0.11791	FALSE
SPNCRNA.1341	Ant1ng-40h	0.977841	-0.0323288	1.03688	0.0522496	0.987533	-0.0180986	1.03626	0.0513835	36	0.238704	0.446102	0.350566	0.0851408	FALSE
SPNCRNA.1341	Bleo20ug-40h	1.07794	0.108278	1.14302	0.192857	1.04886	0.0688212	1.10061	0.138303	20	0.0146238	0.0520974	1.28318	0.128034	FALSE
SPNCRNA.1341	Caff10mM-40h	1.0139	0.0199164	1.07512	0.104495	1.06823	0.0952173	1.12093	0.164699	35	0.558611	0.780875	0.107419	0.123656	FALSE
SPNCRNA.1341	Can60ug-40h	1.12214	0.166257	1.1899	0.250836	1.13203	0.178906	1.18788	0.248388	24	4.22825e-07	1.20505e-05	4.91899	0.0873223	TRUE
SPNCRNA.1341	CoCl0.25mM-40h	0.985047	-0.0217352	1.04452	0.0628432	1.04141	0.0585413	1.0928	0.128023	12	0.725437	0.889246	0.0509781	0.145458	FALSE
SPNCRNA.1341	Diam2mM-40h	1.04455	0.0628878	1.10762	0.147466	1.01568	0.0224464	1.06579	0.0919285	12	0.0964562	0.177355	0.751157	0.0806126	FALSE
SPNCRNA.1341	EGTA10mM-40h	0.997416	-0.00373333	1.05764	0.080845	1.00591	0.00849928	1.05554	0.0779814	9	0.895487	0.951455	0.0216116	0.0459594	FALSE
SPNCRNA.1341	EMM_Arg-40h	0.981308	-0.0272217	1.04056	0.0573566	0.959268	-0.0599937	1.0066	0.00948843	22	0.542785	0.7933	0.100562	0.136404	FALSE
SPNCRNA.1341	EMM_Cyst-40h	1.08687	0.120184	1.1525	0.204762	1.06877	0.095951	1.1215	0.165433	11	0.00170726	0.0114487	1.94124	0.0707304	FALSE
SPNCRNA.1341	EMM_Gal2-40h	1.04148	0.0586378	1.10436	0.143216	1.05486	0.0770497	1.10691	0.146532	23	0.164486	0.315033	0.501644	0.132787	FALSE
SPNCRNA.1341	EMM_Glu-40h	1.0139	0.0199151	1.07512	0.104493	1.03841	0.0543765	1.08965	0.123859	35	0.551522	0.776217	0.110017	0.120486	FALSE
SPNCRNA.1341	EMM_Gluc2-40h	0.92269	-0.116082	0.9784	-0.031504	0.954825	-0.0666915	1.00194	0.00279063	12	0.0371918	0.192721	0.715071	0.114689	FALSE
SPNCRNA.1341	EMM_Gluc3-40h	0.950227	-0.0736566	1.0076	0.0109218	0.966981	-0.0484402	1.01469	0.0210419	12	0.0405636	0.214753	0.66806	0.069382	FALSE
SPNCRNA.1341	EMM_Gly3-40h	1.04194	0.059278	1.10485	0.143856	1.0351	0.0497767	1.08618	0.119259	24	0.0812441	0.185236	0.732273	0.101681	FALSE
SPNCRNA.1341	EMM_NH4Cl-40h	1	0	1.06038	0.0845784	1	0	1.04934	0.0694821	115	1	1	0	0.148524	FALSE
SPNCRNA.1341	EMM_Phe-40h	0.931808	-0.101895	0.988069	-0.0173166	0.962697	-0.0548467	1.0102	0.0146354	24	0.0265399	0.105181	0.978061	0.137128	FALSE
SPNCRNA.1341	EMM_Pro-40h	1.16375	0.218782	1.23402	0.30336	1.17373	0.231095	1.23164	0.300577	36	7.30018e-07	3.6503e-06	5.43767	0.166142	TRUE
SPNCRNA.1341	H2O2_0.5mM-40h	0.991119	-0.0128697	1.05096	0.0717087	1.00047	0.000684096	1.04984	0.0701662	35	0.751274	0.839556	0.0759504	0.154504	FALSE
SPNCRNA.1341	H2O2_1mM-40h	0.975248	-0.0361593	1.03413	0.0484191	1.01309	0.0187631	1.06308	0.0882452	24	0.429201	0.789177	0.102826	0.145663	FALSE
SPNCRNA.1341	H2O2_3mM-40h	1.02885	0.0410315	1.09097	0.12561	1.00548	0.00788902	1.05509	0.0773711	24	0.513931	0.643826	0.191232	0.216253	FALSE
SPNCRNA.1341	HU10mM-40h	1.03758	0.0532157	1.10022	0.137794	1.07558	0.105109	1.12864	0.174591	24	0.178418	0.282495	0.54899	0.125153	FALSE
SPNCRNA.1341	HU20mM-40h	1.15741	0.210905	1.2273	0.295483	1.1641	0.219212	1.22153	0.288694	20	2.20615e-06	6.28754e-05	4.20152	0.113503	TRUE
SPNCRNA.1341	HU5mM-40h	1.01411	0.0202201	1.07534	0.104798	1.04246	0.0599883	1.09389	0.12947	36	0.512584	0.636051	0.196508	0.108317	FALSE
SPNCRNA.1341	MMS0.005-40h	0.98023	-0.0288076	1.03941	0.0557708	0.987209	-0.0185732	1.03592	0.0509089	32	0.325083	0.562783	0.249659	0.090612	FALSE
SPNCRNA.1341	MMS0.0075-40h	0.956062	-0.0648244	1.01379	0.019754	1.02174	0.031022	1.07215	0.100504	23	0.183739	0.465472	0.332107	0.15034	FALSE
SPNCRNA.1341	Rap100ng-40h	0.93118	-0.102868	0.987402	-0.0182899	0.963793	-0.0532048	1.01135	0.0162773	36	0.0473574	0.315736	0.500676	0.198414	FALSE
SPNCRNA.1341	SDS0.001-40h	1.08213	0.113868	1.14746	0.198446	1.09534	0.131376	1.14938	0.200858	20	0.00713429	0.0239209	1.62122	0.119855	FALSE
SPNCRNA.1341	SDS0.005-40h	0.961028	-0.0573496	1.01905	0.0272288	0.959012	-0.0603797	1.00633	0.00910237	20	0.303315	0.566852	0.246531	0.164524	FALSE
SPNCRNA.1341	Sorb1.2M-40h	0.915878	-0.126772	0.971177	-0.0421936	0.949349	-0.0749896	0.99619	-0.00550747	12	0.156627	0.29759	0.526381	0.199125	FALSE
SPNCRNA.1341	TSA500nM-40h	1.05619	0.0788629	1.11996	0.163441	1.0572	0.0802418	1.10936	0.149724	24	0.0472393	0.121677	0.914792	0.125094	FALSE
SPNCRNA.1341	Temp32C-40h	0.952428	-0.0703178	1.00993	0.0142605	0.988875	-0.0161392	1.03767	0.0533429	26	0.102694	0.392934	0.405681	0.136806	FALSE
SPNCRNA.1341	Temp37C-40h	1.06816	0.0951227	1.13265	0.179701	1.06731	0.0939731	1.11997	0.163455	36	0.0239443	0.054593	1.26286	0.167041	FALSE
SPNCRNA.1341	Torin5uM-40h	0.99956	-0.000635375	1.05991	0.083943	1.01692	0.0242004	1.06709	0.0936825	24	0.984876	0.984876	0.00661832	0.0990157	FALSE
SPNCRNA.1341	VPA3mM-40h	0.932225	-0.101249	0.988511	-0.0166708	0.958986	-0.0604184	1.0063	0.00906369	31	0.0599647	0.16703	0.777206	0.191798	FALSE
SPNCRNA.1341	VPA5mM-40h	1.16795	0.223977	1.23847	0.308555	1.16923	0.225558	1.22692	0.29504	12	1.34657e-07	1.91886e-06	5.71696	0.0685582	TRUE
SPNCRNA.1343	Ant0.1ng-40h	0.935659	-0.0959448	0.935388	-0.0963629	0.971987	-0.040991	0.932497	-0.100829	24	0.000323232	0.0122828	1.9107	0.0507852	FALSE
SPNCRNA.1343	Ant1ng-40h	0.9603	-0.0584434	0.960021	-0.0588614	1.00435	0.00626637	0.963548	-0.0535717	35	0.0209083	0.0821911	1.08518	0.0578978	FALSE
SPNCRNA.1343	Bleo20ug-40h	0.949699	-0.0744584	0.949423	-0.0748764	0.988781	-0.0162764	0.948609	-0.0761144	24	0.0071257	0.0312435	1.50524	0.0582204	FALSE
SPNCRNA.1343	Caff10mM-40h	1.01415	0.0202719	1.01386	0.0198539	0.986538	-0.0195528	0.946457	-0.0793909	36	0.665591	0.85748	0.0667761	0.176549	FALSE
SPNCRNA.1343	Can60ug-40h	0.95176	-0.0713306	0.951484	-0.0717487	0.974841	-0.036761	0.935235	-0.0965991	24	0.0209489	0.0547894	1.2613	0.0732647	FALSE
SPNCRNA.1343	CoCl0.25mM-40h	1.01579	0.0226003	1.01549	0.0221823	1.04846	0.0682679	1.00586	0.00842987	12	0.425061	0.757139	0.120824	0.0478173	FALSE
SPNCRNA.1343	Diam2mM-40h	0.876118	-0.190804	0.875864	-0.191222	0.97015	-0.0437204	0.930734	-0.103558	12	0.0133602	0.043516	1.36135	0.143093	FALSE
SPNCRNA.1343	EGTA10mM-40h	0.907607	-0.139861	0.907344	-0.140279	0.948347	-0.0765124	0.909818	-0.13635	12	2.13474e-05	0.000463317	3.33412	0.0466175	TRUE
SPNCRNA.1343	EMM_Arg-40h									0					FALSE
SPNCRNA.1343	EMM_Cyst-40h	0.952358	-0.0704236	0.952082	-0.0708416	1.02745	0.0390667	0.985706	-0.0207714	12	0.132691	0.336149	0.473468	0.092908	FALSE
SPNCRNA.1343	EMM_Gal2-40h	0.977527	-0.0327915	0.977244	-0.0332096	1.0302	0.0429201	0.988342	-0.016918	24	0.247781	0.415414	0.381518	0.0655928	FALSE
SPNCRNA.1343	EMM_Glu-40h	1.02373	0.0338321	1.02343	0.0334141	1.08319	0.115289	1.03918	0.0554514	36	0.333839	0.565473	0.247588	0.120179	FALSE
SPNCRNA.1343	EMM_Gluc2-40h	1.04184	0.0591357	1.04154	0.0587176	1.10282	0.141192	1.05801	0.0813543	8	0.273206	0.536992	0.270032	0.0939292	FALSE
SPNCRNA.1343	EMM_Gluc3-40h	0.959868	-0.0590923	0.95959	-0.0595103	0.986778	-0.0192019	0.946687	-0.0790399	16	0.0295758	0.198332	0.702607	0.0462021	FALSE
SPNCRNA.1343	EMM_Gly3-40h	0.930109	-0.104529	0.929839	-0.104947	1.00179	0.00257414	0.961085	-0.0572639	12	0.0261818	0.0877861	1.05657	0.0877961	FALSE
SPNCRNA.1343	EMM_NH4Cl-40h	1	0	0.99971	-0.000418025	1	0	0.959372	-0.0598381	128	1	1	0	0.157272	FALSE
SPNCRNA.1343	EMM_Phe-40h	0.923426	-0.114931	0.923159	-0.115349	0.95083	-0.07274	0.9122	-0.132578	28	0.00152236	0.0144057	1.84147	0.0974784	FALSE
SPNCRNA.1343	EMM_Pro-40h	1.00475	0.00683938	1.00446	0.00642135	0.993169	-0.00988849	0.952819	-0.0697265	16	0.917527	0.950892	0.0218688	0.172237	FALSE
SPNCRNA.1343	H2O2_0.5mM-40h	1.06641	0.0927615	1.0661	0.0923435	1.11829	0.161294	1.07286	0.101455	28	0.0153407	0.0945262	1.02445	0.119049	FALSE
SPNCRNA.1343	H2O2_1mM-40h	1.02924	0.0415742	1.02894	0.0411562	1.05342	0.0750788	1.01062	0.0152408	24	0.184091	0.5672	0.246263	0.0819697	FALSE
SPNCRNA.1343	H2O2_3mM-40h	1.0301	0.0427819	1.0298	0.0423639	1.06704	0.0936203	1.02369	0.0337822	16	0.352209	0.514766	0.28839	0.113885	FALSE
SPNCRNA.1343	HU10mM-40h	0.973225	-0.0391551	0.972943	-0.0395731	0.998395	-0.00231698	0.957832	-0.062155	36	0.314654	0.459878	0.337357	0.134754	FALSE
SPNCRNA.1343	HU20mM-40h	1.02958	0.0420599	1.02928	0.0416418	1.04888	0.0688542	1.00627	0.00901613	32	0.347965	0.472239	0.325838	0.158003	FALSE
SPNCRNA.1343	HU5mM-40h	0.968962	-0.0454874	0.968682	-0.0459054	1.00935	0.013429	0.968344	-0.0464091	36	0.0787914	0.230313	0.637681	0.0640344	FALSE
SPNCRNA.1343	MMS0.005-40h	0.998624	-0.00198605	0.998335	-0.00240408	1.0473	0.0666789	1.00475	0.0068408	36	0.934173	0.951503	0.0215899	0.0546996	FALSE
SPNCRNA.1343	MMS0.0075-40h	1.00729	0.0104766	1.007	0.0100586	1.03714	0.0526096	0.995002	-0.00722844	36	0.70226	0.851677	0.0697249	0.0778374	FALSE
SPNCRNA.1343	Rap100ng-40h	1.02391	0.0340845	1.02361	0.0336664	1.05462	0.0767293	1.01178	0.0168912	20	0.512602	0.738673	0.131548	0.148519	FALSE
SPNCRNA.1343	SDS0.001-40h	0.976695	-0.0340196	0.976412	-0.0344376	0.986807	-0.0191598	0.946715	-0.0789979	36	0.269826	0.357676	0.44651	0.0943656	FALSE
SPNCRNA.1343	SDS0.005-40h	0.977084	-0.0334451	0.976801	-0.0338631	1.03026	0.0430038	0.988399	-0.0168343	36	0.188368	0.456893	0.340186	0.0621287	FALSE
SPNCRNA.1343	Sorb1.2M-40h	0.93274	-0.100453	0.93247	-0.100871	1.00108	0.00155545	0.960407	-0.0582826	4	0.351457	0.499108	0.301805	0.121149	FALSE
SPNCRNA.1343	TSA500nM-40h	0.993907	-0.00881664	0.993619	-0.00923467	1.02855	0.0406128	0.986762	-0.0192252	24	0.712759	0.797165	0.0984517	0.0436231	FALSE
SPNCRNA.1343	Temp32C-40h	1.03446	0.0488834	1.03416	0.0484654	1.0781	0.108495	1.0343	0.0486569	36	0.19142	0.507487	0.294575	0.132544	FALSE
SPNCRNA.1343	Temp37C-40h	1.06954	0.0969857	1.06923	0.0965677	1.02768	0.039386	0.985924	-0.020452	23	0.0586656	0.104498	0.980891	0.156102	FALSE
SPNCRNA.1343	Torin5uM-40h	0.916547	-0.12572	0.916281	-0.126138	0.964569	-0.052043	0.925381	-0.111881	36	9.97263e-05	0.00227376	2.64326	0.0909908	FALSE
SPNCRNA.1343	VPA3mM-40h	0.930245	-0.104317	0.929975	-0.104735	0.981531	-0.0268948	0.941653	-0.0867328	48	0.00013795	0.00170729	2.76769	0.077641	FALSE
SPNCRNA.1343	VPA5mM-40h	0.966411	-0.0492909	0.966131	-0.0497089	1.0153	0.0219106	0.974053	-0.0379275	35	0.286655	0.367175	0.435126	0.165197	FALSE
SPNCRNA.1348	Ant0.1ng-40h	0.991341	-0.0125464	1.04556	0.0642813	0.982887	-0.0249024	1.0406	0.0574149	36	0.677864	0.813436	0.0896764	0.0961862	FALSE
SPNCRNA.1348	Ant1ng-40h	0.99221	-0.0112827	1.04648	0.065545	1.00032	0.000465341	1.05906	0.0827827	36	0.709273	0.789355	0.102728	0.0966186	FALSE
SPNCRNA.1348	Bleo20ug-40h	1.00963	0.0138305	1.06486	0.0906582	1.00095	0.00136883	1.05972	0.0836862	20	0.750454	0.786016	0.104568	0.124813	FALSE
SPNCRNA.1348	Caff10mM-40h	1.0429	0.0606028	1.09994	0.137431	1.07078	0.0986663	1.13366	0.180984	35	0.0893583	0.226374	0.645173	0.127753	FALSE
SPNCRNA.1348	Can60ug-40h	1.07632	0.106102	1.13519	0.18293	1.08574	0.118684	1.1495	0.201001	24	0.0566851	0.117493	0.929989	0.185132	FALSE
SPNCRNA.1348	CoCl0.25mM-40h	1.03541	0.0502029	1.09204	0.127031	1.03267	0.0463855	1.09331	0.128703	12	0.171358	0.462238	0.335134	0.0756293	FALSE
SPNCRNA.1348	Diam2mM-40h	1.02501	0.0356375	1.08107	0.112465	1.06854	0.0956393	1.13128	0.177957	11	0.437097	0.553657	0.256759	0.0978629	FALSE
SPNCRNA.1348	EGTA10mM-40h	1.08492	0.117593	1.14426	0.194421	1.10538	0.144542	1.17028	0.226859	11	0.0261956	0.065489	1.18383	0.109274	FALSE
SPNCRNA.1348	EMM_Arg-40h	0.906903	-0.140979	0.956508	-0.0641517	0.881678	-0.181677	0.933447	-0.0993596	23	0.0645015	0.197666	0.704068	0.233262	FALSE
SPNCRNA.1348	EMM_Cyst-40h	1.01873	0.026773	1.07445	0.103601	1.06132	0.0858568	1.12364	0.168174	11	0.726213	0.880727	0.0551587	0.175786	FALSE
SPNCRNA.1348	EMM_Gal2-40h	0.946005	-0.080081	0.997747	-0.00325334	0.944388	-0.0825488	0.99984	-0.000231485	24	0.0419152	0.124643	0.904334	0.111347	FALSE
SPNCRNA.1348	EMM_Glu-40h	0.980859	-0.0278821	1.03451	0.0489456	0.980175	-0.0288889	1.03773	0.0534284	36	0.365448	0.570699	0.243593	0.0984779	FALSE
SPNCRNA.1348	EMM_Gluc2-40h	1.00113	0.00162566	1.05589	0.0784534	1.039	0.0551954	1.10001	0.137513	12	0.970392	0.993136	0.00299143	0.0964311	FALSE
SPNCRNA.1348	EMM_Gluc3-40h	0.998714	-0.00185658	1.05334	0.0749711	0.989083	-0.0158367	1.04716	0.0664806	12	0.963659	0.963659	0.0160764	0.0876751	FALSE
SPNCRNA.1348	EMM_Gly3-40h	1.00508	0.00731263	1.06006	0.0841403	1.03396	0.0481851	1.09467	0.130502	24	0.849829	0.872797	0.0590865	0.116778	FALSE
SPNCRNA.1348	EMM_NH4Cl-40h	1	0	1.0547	0.0768277	1	0	1.05872	0.0823173	124	1	1	0	0.166501	FALSE
SPNCRNA.1348	EMM_Phe-40h	1.01245	0.0178503	1.06783	0.094678	1.06135	0.0859017	1.12367	0.168219	24	0.710454	0.851037	0.0700514	0.155434	FALSE
SPNCRNA.1348	EMM_Pro-40h	1.1229	0.167227	1.18432	0.244055	1.13233	0.17929	1.19881	0.261608	35	4.65313e-05	0.000134047	3.87274	0.150467	TRUE
SPNCRNA.1348	H2O2_0.5mM-40h	1.03628	0.051413	1.09296	0.128241	1.0044	0.00632774	1.06337	0.0886451	35	0.274118	0.44642	0.350256	0.184653	FALSE
SPNCRNA.1348	H2O2_1mM-40h	1.06119	0.0856813	1.11923	0.162509	1.01801	0.0257542	1.07779	0.108072	24	0.0612443	0.332469	0.478249	0.146251	FALSE
SPNCRNA.1348	H2O2_3mM-40h	1.02959	0.042066	1.0859	0.118894	1.0141	0.0201986	1.07364	0.102516	24	0.412687	0.554051	0.25645	0.169014	FALSE
SPNCRNA.1348	HU10mM-40h	1.06074	0.0850725	1.11876	0.1619	1.08371	0.115982	1.14735	0.198299	24	0.166903	0.267986	0.571889	0.208872	FALSE
SPNCRNA.1348	HU20mM-40h	1.06908	0.0963735	1.12756	0.173201	1.03827	0.0541802	1.09923	0.136498	20	0.065361	0.124186	0.905928	0.155751	FALSE
SPNCRNA.1348	HU5mM-40h	0.983293	-0.0243074	1.03708	0.0525203	0.976636	-0.034107	1.03398	0.0482104	36	0.4623	0.612816	0.21267	0.111591	FALSE
SPNCRNA.1348	MMS0.005-40h	0.980323	-0.0286704	1.03394	0.0481573	0.990455	-0.0138361	1.04861	0.0684812	32	0.477992	0.633618	0.198173	0.140897	FALSE
SPNCRNA.1348	MMS0.0075-40h	0.992086	-0.0114626	1.04635	0.0653651	1.00351	0.00505053	1.06243	0.0873679	24	0.695307	0.851677	0.0697249	0.0738387	FALSE
SPNCRNA.1348	Rap100ng-40h	1.01913	0.0273369	1.07487	0.104165	0.983945	-0.0233505	1.04172	0.0589668	33	0.584499	0.779214	0.108343	0.192114	FALSE
SPNCRNA.1348	SDS0.001-40h	1.05691	0.0798531	1.11472	0.156681	1.03753	0.053149	1.09845	0.135466	20	0.0840507	0.140908	0.851063	0.134374	FALSE
SPNCRNA.1348	SDS0.005-40h	0.97866	-0.0311198	1.03219	0.0457079	0.986439	-0.0196978	1.04436	0.0626195	20	0.329993	0.597129	0.223931	0.0775275	FALSE
SPNCRNA.1348	Sorb1.2M-40h	0.921875	-0.117358	0.972298	-0.04053	0.919461	-0.121139	0.97345	-0.0388217	10	0.0629912	0.156996	0.804112	0.11816	FALSE
SPNCRNA.1348	TSA500nM-40h	0.971083	-0.042334	1.0242	0.0344937	1.01303	0.0186835	1.07252	0.101001	24	0.326857	0.470896	0.327075	0.131432	FALSE
SPNCRNA.1348	Temp32C-40h	0.969086	-0.0453039	1.02209	0.0315238	0.984011	-0.0232531	1.04179	0.0590642	28	0.285085	0.607012	0.216803	0.138535	FALSE
SPNCRNA.1348	Temp37C-40h	1.01716	0.0245514	1.0728	0.101379	1.01924	0.0274877	1.07908	0.109805	36	0.408777	0.480419	0.31838	0.0953791	FALSE
SPNCRNA.1348	Torin5uM-40h	0.999233	-0.00110762	1.05389	0.0757201	1.03101	0.044059	1.09155	0.126376	23	0.978305	0.984876	0.00661832	0.122369	FALSE
SPNCRNA.1348	VPA3mM-40h	0.974364	-0.0374666	1.02766	0.0393611	0.990056	-0.0144176	1.04819	0.0678998	32	0.376728	0.536837	0.270157	0.149271	FALSE
SPNCRNA.1348	VPA5mM-40h	1.11961	0.162992	1.18084	0.239819	1.13941	0.188285	1.20631	0.270602	11	0.000350001	0.001596	2.79697	0.0819126	TRUE
SPNCRNA.1361	Ant0.1ng-40h	0.983863	-0.0234708	0.976611	-0.0341442	0.984617	-0.0223658	0.986383	-0.0197803	36	0.370686	0.603689	0.219187	0.0656022	FALSE
SPNCRNA.1361	Ant1ng-40h	1.05148	0.0724277	1.04373	0.0617543	1.03341	0.0474077	1.03526	0.0499932	36	0.00314792	0.0276048	1.55901	0.0573525	FALSE
SPNCRNA.1361	Bleo20ug-40h	1.02395	0.034146	1.0164	0.0234726	1.02595	0.0369636	1.02779	0.0395491	20	0.233487	0.331532	0.479474	0.0620468	FALSE
SPNCRNA.1361	Caff10mM-40h	1.05337	0.0750136	1.04561	0.0643402	1.07178	0.100007	1.0737	0.102593	36	0.0401585	0.123542	0.908186	0.126306	FALSE
SPNCRNA.1361	Can60ug-40h	1.11836	0.161386	1.11012	0.150712	1.10083	0.138594	1.10281	0.14118	24	0.000146789	0.000936677	3.02841	0.118681	TRUE
SPNCRNA.1361	CoCl0.25mM-40h	1.01631	0.0233368	1.00882	0.0126634	1.02001	0.0285831	1.02184	0.0311686	12	0.564131	0.824499	0.0838097	0.0822072	FALSE
SPNCRNA.1361	Diam2mM-40h	1.04363	0.0616154	1.03594	0.0509421	1.02187	0.0312145	1.0237	0.0338	12	0.0146811	0.0450349	1.34645	0.0348849	FALSE
SPNCRNA.1361	EGTA10mM-40h	0.956618	-0.0639847	0.949567	-0.0746581	0.951554	-0.0716426	0.953261	-0.0690571	12	0.0261733	0.065489	1.18383	0.0430646	FALSE
SPNCRNA.1361	EMM_Arg-40h	0.90318	-0.146914	0.896523	-0.157587	0.909993	-0.136073	0.911625	-0.133488	24	0.00023241	0.00183991	2.7352	0.096559	TRUE
SPNCRNA.1361	EMM_Cyst-40h	1.09497	0.130896	1.0869	0.120222	1.08028	0.111402	1.08221	0.113987	12	0.00165003	0.0114487	1.94124	0.0765344	FALSE
SPNCRNA.1361	EMM_Gal2-40h	1.00697	0.0100199	0.999547	-0.000653527	1.04143	0.0585597	1.04329	0.0611452	24	0.833404	0.896902	0.0472552	0.144242	FALSE
SPNCRNA.1361	EMM_Glu-40h	1.04798	0.0676045	1.04025	0.0569311	1.04273	0.0603689	1.0446	0.0629544	36	0.0610353	0.337825	0.471308	0.124026	FALSE
SPNCRNA.1361	EMM_Gluc2-40h	0.951019	-0.0724536	0.944009	-0.083127	0.934472	-0.0977764	0.936148	-0.0951908	12	0.0847844	0.282235	0.54939	0.0791943	FALSE
SPNCRNA.1361	EMM_Gluc3-40h	0.978828	-0.0308726	0.971613	-0.041546	0.973384	-0.0389183	0.975131	-0.0363328	12	0.545974	0.801368	0.096168	0.107432	FALSE
SPNCRNA.1361	EMM_Gly3-40h	1.09033	0.124764	1.08229	0.114091	1.07701	0.107038	1.07895	0.109624	24	0.000187127	0.00266656	2.57405	0.0857111	TRUE
SPNCRNA.1361	EMM_NH4Cl-40h	1	0	0.992629	-0.0106734	1	0	1.00179	0.00258552	124	1	1	0	0.156913	FALSE
SPNCRNA.1361	EMM_Phe-40h	0.999198	-0.0011577	0.991833	-0.0118311	0.995412	-0.00663392	0.997198	-0.0040484	24	0.97135	0.994262	0.00249903	0.083264	FALSE
SPNCRNA.1361	EMM_Pro-40h	1.19137	0.252616	1.18258	0.241943	1.1801	0.238915	1.18222	0.2415	36	1.59464e-06	7.04924e-06	5.15186	0.191325	TRUE
SPNCRNA.1361	H2O2_0.5mM-40h	1.04352	0.0614516	1.03582	0.0507782	1.02908	0.0413558	1.03093	0.0439413	36	0.10489	0.25183	0.598892	0.133028	FALSE
SPNCRNA.1361	H2O2_1mM-40h	1.04735	0.0667401	1.03963	0.0560668	1.04983	0.070161	1.05172	0.0727465	24	0.121957	0.496541	0.304045	0.128106	FALSE
SPNCRNA.1361	H2O2_3mM-40h	1.09234	0.127419	1.08429	0.116746	1.06559	0.0916585	1.06751	0.0942441	24	0.0119604	0.0454495	1.34247	0.154006	FALSE
SPNCRNA.1361	HU10mM-40h	1.10832	0.148368	1.10015	0.137695	1.11661	0.159126	1.11861	0.161712	24	8.25624e-05	0.000505285	3.29646	0.100981	TRUE
SPNCRNA.1361	HU20mM-40h	1.14216	0.191771	1.13375	0.181097	1.16887	0.225109	1.17096	0.227694	20	0.00288208	0.0109653	1.95998	0.179385	FALSE
SPNCRNA.1361	HU5mM-40h	1.02913	0.0414206	1.02154	0.0307473	1.04635	0.0653591	1.04822	0.0679446	36	0.206053	0.368285	0.433816	0.106677	FALSE
SPNCRNA.1361	MMS0.005-40h	1.01812	0.025902	1.01061	0.0152287	0.997838	-0.00312249	0.999628	-0.00053697	32	0.32223	0.562783	0.249659	0.0642118	FALSE
SPNCRNA.1361	MMS0.0075-40h	1.06185	0.0865757	1.05402	0.0759023	1.04943	0.069601	1.05131	0.0721866	24	0.00112805	0.0107165	1.96995	0.0572225	FALSE
SPNCRNA.1361	Rap100ng-40h	1.04239	0.0598899	1.0347	0.0492165	1.00026	0.000373046	1.00205	0.00295857	36	0.142777	0.476575	0.321869	0.147476	FALSE
SPNCRNA.1361	SDS0.001-40h	1.08422	0.116656	1.07623	0.105982	1.06224	0.0871126	1.06415	0.0896981	20	0.000472802	0.00299441	2.52369	0.0774093	TRUE
SPNCRNA.1361	SDS0.005-40h	1.04952	0.0697358	1.04179	0.0590624	1.04154	0.0587141	1.04341	0.0612997	20	0.0146058	0.0723937	1.1403	0.0610738	FALSE
SPNCRNA.1361	Sorb1.2M-40h	1.12706	0.172565	1.11875	0.161892	1.0803	0.111437	1.08224	0.114022	12	0.000368853	0.00600704	2.22134	0.0880976	TRUE
SPNCRNA.1361	TSA500nM-40h	0.982089	-0.0260742	0.97485	-0.0367476	0.987115	-0.0187093	0.988886	-0.0161238	24	0.557897	0.673212	0.171848	0.130123	FALSE
SPNCRNA.1361	Temp32C-40h	1.01589	0.0227486	1.00841	0.0120753	1.05692	0.0798692	1.05882	0.0824547	28	0.54717	0.854485	0.0682956	0.115838	FALSE
SPNCRNA.1361	Temp37C-40h	1.09419	0.12986	1.08612	0.119187	1.08895	0.12294	1.0909	0.125525	36	0.00031274	0.00237682	2.624	0.121629	TRUE
SPNCRNA.1361	Torin5uM-40h	1.03398	0.0482127	1.02636	0.0375393	1.05065	0.0712844	1.05254	0.0738699	24	0.137194	0.325836	0.487001	0.0852006	FALSE
SPNCRNA.1361	VPA3mM-40h	1.00694	0.00998057	0.99952	-0.000692804	1.00948	0.013613	1.01129	0.0161986	32	0.765998	0.853043	0.0690288	0.103307	FALSE
SPNCRNA.1361	VPA5mM-40h	1.14883	0.20016	1.14036	0.189487	1.13679	0.184964	1.13883	0.187549	12	1.0353e-06	1.07295e-05	4.96942	0.0646791	TRUE
SPNCRNA.137	Ant0.1ng-40h	0.975456	-0.035851	1.03638	0.0515515	0.973506	-0.0387383	1.03633	0.0514834	36	0.0949167	0.262599	0.580707	0.0552307	FALSE
SPNCRNA.137	Ant1ng-40h	0.955087	-0.0662955	1.01474	0.021107	0.96881	-0.0457139	1.03133	0.0445078	36	0.0159855	0.0730986	1.13609	0.0893108	FALSE
SPNCRNA.137	Bleo20ug-40h	1.06334	0.0886014	1.12975	0.176004	1.05039	0.070923	1.11817	0.161145	20	0.0108405	0.0426144	1.37044	0.0965109	FALSE
SPNCRNA.137	Caff10mM-40h	1.0203	0.0289958	1.08403	0.116398	1.01471	0.0210703	1.0802	0.111292	36	0.287444	0.528526	0.276934	0.0948719	FALSE
SPNCRNA.137	Can60ug-40h	1.037	0.0524188	1.10177	0.139821	1.06584	0.0919898	1.13462	0.182211	23	0.232971	0.349456	0.456608	0.142865	FALSE
SPNCRNA.137	CoCl0.25mM-40h	0.994002	-0.00867929	1.05608	0.0787232	0.991061	-0.012954	1.05502	0.0772676	11	0.8576	0.958494	0.0184105	0.107824	FALSE
SPNCRNA.137	Diam2mM-40h	0.979365	-0.030082	1.04053	0.0573205	0.963765	-0.053247	1.02596	0.0369746	11	0.457507	0.56691	0.246486	0.0859067	FALSE
SPNCRNA.137	EGTA10mM-40h	1.02217	0.0316354	1.08601	0.119038	1.05045	0.0710076	1.11824	0.161229	12	0.516329	0.655045	0.183729	0.114735	FALSE
SPNCRNA.137	EMM_Arg-40h	0.861042	-0.215845	0.914819	-0.128442	0.879309	-0.185557	0.936054	-0.0953356	24	0.00025243	0.00184468	2.73408	0.163046	TRUE
SPNCRNA.137	EMM_Cyst-40h	1.02954	0.0419942	1.09384	0.129397	1.11829	0.161292	1.19046	0.251514	12	0.61297	0.812541	0.0901546	0.204799	FALSE
SPNCRNA.137	EMM_Gal2-40h	0.913383	-0.130709	0.970428	-0.0433064	0.956217	-0.0645901	1.01793	0.0256315	24	0.0271391	0.0901975	1.04481	0.183555	FALSE
SPNCRNA.137	EMM_Glu-40h	0.993442	-0.00949206	1.05549	0.0779104	0.995541	-0.00644725	1.05979	0.0837744	36	0.771209	0.845364	0.0729562	0.121983	FALSE
SPNCRNA.137	EMM_Gluc2-40h	0.952603	-0.0700526	1.0121	0.0173499	0.957344	-0.0628904	1.01913	0.0273312	12	0.178841	0.401019	0.396835	0.11555	FALSE
SPNCRNA.137	EMM_Gluc3-40h	1.02632	0.0374762	1.09042	0.124879	1.02996	0.0425939	1.09643	0.132815	12	0.178706	0.433458	0.363053	0.0552912	FALSE
SPNCRNA.137	EMM_Gly3-40h	0.91549	-0.127385	0.972667	-0.0399821	0.941903	-0.0863495	1.00269	0.00387207	22	0.00357121	0.0214273	1.66903	0.120341	FALSE
SPNCRNA.137	EMM_NH4Cl-40h	1	0	1.06246	0.0874025	1	0	1.06453	0.0902216	124	1	1	0	0.13903	FALSE
SPNCRNA.137	EMM_Phe-40h	1.00681	0.00979283	1.06969	0.0971953	1.04107	0.058068	1.10825	0.14829	24	0.774903	0.874643	0.0581693	0.106859	FALSE
SPNCRNA.137	EMM_Pro-40h	1.1078	0.147691	1.17698	0.235093	1.11434	0.156184	1.18625	0.246405	36	1.60772e-06	7.04924e-06	5.15186	0.108005	TRUE
SPNCRNA.137	H2O2_0.5mM-40h	0.939854	-0.0894916	0.998553	-0.00208917	0.941788	-0.0865262	1.00256	0.00369541	35	0.0719636	0.224792	0.648218	0.191356	FALSE
SPNCRNA.137	H2O2_1mM-40h	0.99634	-0.00529004	1.05857	0.0821124	0.972108	-0.0408111	1.03484	0.0494105	24	0.895429	0.954008	0.020448	0.130206	FALSE
SPNCRNA.137	H2O2_3mM-40h	1.06917	0.0964952	1.13595	0.183898	1.03974	0.0562253	1.10684	0.146447	24	0.0769816	0.179773	0.745275	0.186351	FALSE
SPNCRNA.137	HU10mM-40h	1.14344	0.19338	1.21485	0.280783	1.14816	0.199329	1.22226	0.289551	24	0.000908179	0.00304507	2.5164	0.191582	TRUE
SPNCRNA.137	HU20mM-40h	1.09768	0.134461	1.16624	0.221864	1.09063	0.125165	1.16102	0.215387	20	3.33578e-05	0.000444679	3.35195	0.0819291	TRUE
SPNCRNA.137	HU5mM-40h	0.925734	-0.111331	0.983551	-0.0239283	0.943278	-0.0842444	1.00415	0.00597721	36	0.000834846	0.00634483	2.19758	0.112875	TRUE
SPNCRNA.137	MMS0.005-40h	0.979013	-0.0305999	1.04016	0.0568025	0.99529	-0.00681131	1.05952	0.0834103	32	0.361071	0.587037	0.231335	0.117354	FALSE
SPNCRNA.137	MMS0.0075-40h	0.934138	-0.098293	0.99248	-0.0108905	0.931371	-0.102573	0.991475	-0.012351	23	0.000818242	0.00847996	2.07161	0.073603	TRUE
SPNCRNA.137	Rap100ng-40h	0.973321	-0.0390127	1.03411	0.0483898	0.935858	-0.0956392	0.996252	-0.00541756	35	0.337867	0.664084	0.177777	0.156771	FALSE
SPNCRNA.137	SDS0.001-40h	1.08015	0.111232	1.14761	0.198634	1.0414	0.0585259	1.10861	0.148748	20	0.00409971	0.0155465	1.80837	0.10905	FALSE
SPNCRNA.137	SDS0.005-40h	0.958964	-0.0604512	1.01886	0.0269513	0.968406	-0.0463158	1.0309	0.0439058	20	0.287396	0.566852	0.246531	0.170153	FALSE
SPNCRNA.137	Sorb1.2M-40h	1.13056	0.177039	1.20117	0.264442	1.08375	0.116033	1.15369	0.206255	12	0.0627248	0.156996	0.804112	0.229796	FALSE
SPNCRNA.137	TSA500nM-40h	0.946998	-0.0785668	1.00614	0.0088357	0.942198	-0.0858977	1.003	0.00432393	24	0.00558298	0.0249765	1.60247	0.0739343	FALSE
SPNCRNA.137	Temp32C-40h	0.960559	-0.0580536	1.02055	0.0293489	0.995404	-0.0066461	1.05964	0.0835755	28	0.0991574	0.392934	0.405681	0.114058	FALSE
SPNCRNA.137	Temp37C-40h	1.04406	0.0622037	1.10927	0.149606	1.03242	0.0460283	1.09904	0.13625	36	0.0650142	0.11087	0.955187	0.129317	FALSE
SPNCRNA.137	Torin5uM-40h	0.95664	-0.0639514	1.01639	0.0234511	0.952386	-0.0703812	1.01385	0.0198404	24	0.0372836	0.14268	0.845638	0.0859168	FALSE
SPNCRNA.137	VPA3mM-40h	0.971567	-0.0416153	1.03225	0.0457872	0.960698	-0.0578444	1.0227	0.0323772	32	0.2002	0.374144	0.426961	0.111398	FALSE
SPNCRNA.137	VPA5mM-40h	1.17341	0.230703	1.24669	0.318105	1.14723	0.198151	1.22126	0.288372	12	5.15226e-05	0.00032631	3.48637	0.105545	TRUE
SPNCRNA.1415	Ant0.1ng-40h	0.970308	-0.0434852	1.00651	0.00936547	0.989672	-0.0149783	1.00667	0.00958373	36	0.115314	0.279699	0.553309	0.0926771	FALSE
SPNCRNA.1415	Ant1ng-40h	0.957426	-0.0627664	0.993151	-0.00991568	0.996076	-0.00567193	1.01318	0.0188901	36	0.0146949	0.0728358	1.13766	0.0804784	FALSE
SPNCRNA.1415	Bleo20ug-40h	1.02787	0.03966	1.06622	0.0925107	1.04306	0.0608289	1.06098	0.085391	20	0.211226	0.312724	0.504838	0.0871145	FALSE
SPNCRNA.1415	Caff10mM-40h	0.992112	-0.0114252	1.02913	0.0414255	0.996392	-0.00521421	1.0135	0.0193478	36	0.727932	0.86666	0.0621515	0.121865	FALSE
SPNCRNA.1415	Can60ug-40h	1.08732	0.120772	1.12789	0.173622	1.11425	0.156068	1.13338	0.18063	23	1.72754e-05	0.000164117	3.78485	0.0728382	TRUE
SPNCRNA.1415	CoCl0.25mM-40h	1.0325	0.0461409	1.07102	0.0989916	1.03839	0.0543476	1.05622	0.0789096	12	0.178628	0.462238	0.335134	0.0731582	FALSE
SPNCRNA.1415	Diam2mM-40h	1.03187	0.0452597	1.07037	0.0981104	1.05619	0.0788744	1.07433	0.103436	12	0.0884649	0.170932	0.767176	0.050843	FALSE
SPNCRNA.1415	EGTA10mM-40h	1.0008	0.00115149	1.03814	0.0540022	1.05111	0.0719121	1.06916	0.0964741	12	0.980143	0.980143	0.00871036	0.105873	FALSE
SPNCRNA.1415	EMM_Arg-40h	0.849983	-0.234493	0.881698	-0.181643	0.89403	-0.161605	0.909381	-0.137043	24	3.24028e-08	1.53913e-06	5.81272	0.096598	TRUE
SPNCRNA.1415	EMM_Cyst-40h	1.08062	0.111859	1.12094	0.16471	1.10795	0.147892	1.12697	0.172454	12	0.000305379	0.0029011	2.53744	0.0560602	TRUE
SPNCRNA.1415	EMM_Gal2-40h	1.02546	0.0362692	1.06372	0.0891199	1.06381	0.0892443	1.08208	0.113806	24	0.160482	0.312662	0.504924	0.0709063	FALSE
SPNCRNA.1415	EMM_Glu-40h	1.02509	0.0357488	1.06334	0.0885995	1.06348	0.0887914	1.08174	0.113353	36	0.294569	0.565473	0.247588	0.130021	FALSE
SPNCRNA.1415	EMM_Gluc2-40h	0.985694	-0.0207875	1.02247	0.0320632	0.997437	-0.00370243	1.01456	0.0208596	12	0.574764	0.800281	0.0967576	0.0803155	FALSE
SPNCRNA.1415	EMM_Gluc3-40h	1.0036	0.00518356	1.04105	0.0580343	1.03947	0.0558538	1.05732	0.0804158	12	0.863982	0.918482	0.0369296	0.0627681	FALSE
SPNCRNA.1415	EMM_Gly3-40h	1.04008	0.0566922	1.07889	0.109543	1.04925	0.0693626	1.06727	0.0939246	24	0.110768	0.229591	0.639045	0.110776	FALSE
SPNCRNA.1415	EMM_NH4Cl-40h	1	0	1.03731	0.0528507	1	0	1.01717	0.024562	124	1	1	0	0.129649	FALSE
SPNCRNA.1415	EMM_Phe-40h	0.977234	-0.0332246	1.0137	0.0196261	0.989593	-0.0150922	1.00659	0.00946981	23	0.218402	0.429274	0.367266	0.0717707	FALSE
SPNCRNA.1415	EMM_Pro-40h	1.1332	0.180401	1.17548	0.233252	1.14021	0.189303	1.15979	0.213865	36	0.00016262	0.000378341	3.42212	0.188938	TRUE
SPNCRNA.1415	H2O2_0.5mM-40h	1.05183	0.0729044	1.09108	0.125755	1.02988	0.0424795	1.04757	0.0670416	36	0.0752317	0.225695	0.646478	0.163113	FALSE
SPNCRNA.1415	H2O2_1mM-40h	1.04877	0.0687047	1.08791	0.121555	1.05587	0.0784273	1.074	0.102989	24	0.200081	0.598571	0.222884	0.180025	FALSE
SPNCRNA.1415	H2O2_3mM-40h	1.09007	0.12442	1.13074	0.17727	1.09971	0.137127	1.1186	0.161689	24	0.000967546	0.0105524	1.97665	0.113733	FALSE
SPNCRNA.1415	HU10mM-40h	1.10777	0.147655	1.1491	0.200505	1.1514	0.20339	1.17117	0.227952	24	1.17397e-06	1.9119e-05	4.71854	0.0807895	TRUE
SPNCRNA.1415	HU20mM-40h	1.12889	0.174899	1.17101	0.227749	1.1543	0.207017	1.17412	0.231579	20	0.00256695	0.0108382	1.96504	0.168703	FALSE
SPNCRNA.1415	HU5mM-40h	1.02	0.0285701	1.05806	0.0814208	1.04335	0.061225	1.06127	0.085787	36	0.201609	0.368285	0.433816	0.0671792	FALSE
SPNCRNA.1415	MMS0.005-40h	1.01784	0.0255172	1.05582	0.0783679	1.0492	0.0692865	1.06721	0.0938485	32	0.329393	0.562783	0.249659	0.0838833	FALSE
SPNCRNA.1415	MMS0.0075-40h	1.03475	0.0492788	1.07336	0.102129	1.03386	0.0480419	1.05161	0.0726039	24	0.181622	0.465472	0.332107	0.116332	FALSE
SPNCRNA.1415	Rap100ng-40h	0.990849	-0.0132623	1.02782	0.0395884	1.02557	0.0364302	1.04318	0.0609923	35	0.594988	0.779214	0.108343	0.0795874	FALSE
SPNCRNA.1415	SDS0.001-40h	1.05995	0.0839958	1.0995	0.136846	1.08101	0.112374	1.09957	0.136936	19	0.0038107	0.01498	1.82449	0.0719837	FALSE
SPNCRNA.1415	SDS0.005-40h	1.02928	0.0416363	1.06769	0.094487	1.06449	0.0901593	1.08277	0.114721	20	0.30055	0.566852	0.246531	0.117687	FALSE
SPNCRNA.1415	Sorb1.2M-40h	1.06646	0.0928247	1.10625	0.145675	1.05036	0.070884	1.0684	0.0954461	12	0.0230001	0.0845811	1.07273	0.0861739	FALSE
SPNCRNA.1415	TSA500nM-40h	1.02149	0.030669	1.0596	0.0835197	1.06084	0.0852109	1.07906	0.109773	24	0.22482	0.398118	0.399988	0.0683666	FALSE
SPNCRNA.1415	Temp32C-40h	0.988651	-0.0164663	1.02554	0.0363844	1.05324	0.0748278	1.07132	0.0993898	28	0.649536	0.888068	0.0515538	0.121362	FALSE
SPNCRNA.1415	Temp37C-40h	1.07902	0.109719	1.11928	0.16257	1.11637	0.158811	1.13554	0.183373	36	0.00145601	0.0074912	2.12545	0.129327	TRUE
SPNCRNA.1415	Torin5uM-40h	1.01015	0.0145655	1.04784	0.0674162	1.0373	0.0528264	1.05511	0.0773884	24	0.608303	0.806356	0.0934734	0.0820919	FALSE
SPNCRNA.1415	VPA3mM-40h	1.00677	0.0097344	1.04434	0.0625851	1.01979	0.0282714	1.0373	0.0528335	32	0.684393	0.79556	0.0993268	0.0717787	FALSE
SPNCRNA.1415	VPA5mM-40h	1.09204	0.127025	1.13279	0.179875	1.14522	0.195628	1.16489	0.22019	12	0.0331479	0.0619484	1.20797	0.132963	FALSE
SPNCRNA.1425	Ant0.1ng-40h	1.00509	0.00731879	0.915593	-0.127221	1.01643	0.0235117	0.96092	-0.0575116	36	0.888915	0.935	0.0291886	0.172014	FALSE
SPNCRNA.1425	Ant1ng-40h	0.983137	-0.0245359	0.895599	-0.159076	0.994329	-0.00820476	0.940026	-0.0892281	52	0.628402	0.744177	0.128324	0.195053	FALSE
SPNCRNA.1425	Bleo20ug-40h	0.934384	-0.0979124	0.851187	-0.232452	0.982022	-0.0261732	0.92839	-0.107197	36	0.123261	0.212905	0.671813	0.2067	FALSE
SPNCRNA.1425	Caff10mM-40h	1.03977	0.0562613	0.947187	-0.0782788	1.05339	0.0750422	0.995863	-0.00598114	48	0.269862	0.504333	0.297283	0.195269	FALSE
SPNCRNA.1425	Can60ug-40h	0.945719	-0.0805172	0.861512	-0.215057	0.982367	-0.0256664	0.928717	-0.10669	56	0.205956	0.326097	0.486653	0.262972	FALSE
SPNCRNA.1425	CoCl0.25mM-40h	1.0141	0.0202042	0.923808	-0.114336	1.06925	0.0966043	1.01086	0.015581	36	0.787956	0.916601	0.0378195	0.267346	FALSE
SPNCRNA.1425	Diam2mM-40h	0.946158	-0.0798467	0.861912	-0.214387	0.980819	-0.0279405	0.927254	-0.108964	24	0.333393	0.436859	0.359659	0.230645	FALSE
SPNCRNA.1425	EGTA10mM-40h	0.889041	-0.169678	0.809881	-0.304218	0.969203	-0.045129	0.916272	-0.126152	12	0.225312	0.341991	0.465985	0.267968	FALSE
SPNCRNA.1425	EMM_Arg-40h	1.00368	0.00530522	0.914316	-0.129235	1.13535	0.183134	1.07334	0.102111	4	0.987763	0.987763	0.00534738	0.402262	FALSE
SPNCRNA.1425	EMM_Cyst-40h	0.946162	-0.0798407	0.861916	-0.214381	0.927541	-0.108516	0.876885	-0.18954	16	0.395511	0.602682	0.219912	0.215575	FALSE
SPNCRNA.1425	EMM_Gal2-40h	0.977585	-0.0327059	0.890541	-0.167246	1.00951	0.0136497	0.954374	-0.0673737	36	0.55665	0.714789	0.145822	0.182335	FALSE
SPNCRNA.1425	EMM_Glu-40h	1.03869	0.0547595	0.946202	-0.0797806	1.0059	0.00848983	0.950967	-0.0725335	60	0.128706	0.425413	0.37119	0.125911	FALSE
SPNCRNA.1425	EMM_Gluc2-40h	0.994176	-0.00842622	0.905655	-0.142966	0.986953	-0.0189474	0.933052	-0.0999707	20	0.910419	0.993136	0.00299143	0.195401	FALSE
SPNCRNA.1425	EMM_Gluc3-40h	0.957156	-0.0631741	0.871931	-0.197714	1.05986	0.0838738	1.00198	0.00285053	31	0.498498	0.801368	0.096168	0.30436	FALSE
SPNCRNA.1425	EMM_Gly3-40h	0.95872	-0.0608185	0.873356	-0.195359	0.981631	-0.0267473	0.928021	-0.107771	15	0.415581	0.532318	0.273829	0.162945	FALSE
SPNCRNA.1425	EMM_NH4Cl-40h	1	0	0.91096	-0.13454	1	0	0.945387	-0.0810233	211	1	1	0	0.238286	FALSE
SPNCRNA.1425	EMM_Phe-40h	0.921804	-0.117468	0.839727	-0.252008	0.998787	-0.0017513	0.94424	-0.0827746	40	0.0997334	0.252658	0.597467	0.248122	FALSE
SPNCRNA.1425	EMM_Pro-40h	1.0787	0.109293	0.982652	-0.0252469	1.019	0.0271483	0.963345	-0.053875	28	0.0830457	0.145649	0.836692	0.194721	FALSE
SPNCRNA.1425	H2O2_0.5mM-40h	1.08454	0.117089	0.987976	-0.0174515	1.02937	0.0417622	0.973153	-0.0392611	39	0.000327872	0.00747549	2.12636	0.0819772	FALSE
SPNCRNA.1425	H2O2_1mM-40h	1.05319	0.074771	0.959418	-0.0597691	1.01148	0.016465	0.956238	-0.0645584	40	0.0691053	0.358091	0.446006	0.130512	FALSE
SPNCRNA.1425	H2O2_3mM-40h	1.05069	0.0713401	0.957139	-0.0632	0.981343	-0.0271699	0.927749	-0.108193	28	0.0756798	0.179773	0.745275	0.10418	FALSE
SPNCRNA.1425	HU10mM-40h	0.990525	-0.0137353	0.902329	-0.148275	1.03058	0.0434549	0.974296	-0.0375684	72	0.778354	0.878539	0.0562391	0.219235	FALSE
SPNCRNA.1425	HU20mM-40h	1.01081	0.0155133	0.920809	-0.119027	1.01836	0.0262466	0.962743	-0.0547767	63	0.762006	0.868686	0.061137	0.222112	FALSE
SPNCRNA.1425	HU5mM-40h	0.964421	-0.0522653	0.878549	-0.186805	0.987446	-0.0182264	0.933518	-0.0992497	72	0.263667	0.417472	0.379372	0.201715	FALSE
SPNCRNA.1425	MMS0.005-40h	0.932496	-0.100831	0.849467	-0.235371	1.00001	1.9182e-05	0.945399	-0.0810041	72	0.0483586	0.262518	0.580841	0.221772	FALSE
SPNCRNA.1425	MMS0.0075-40h	1.01977	0.0282375	0.928966	-0.106303	1.01177	0.0168823	0.956515	-0.064141	70	0.452196	0.706169	0.151091	0.145461	FALSE
SPNCRNA.1425	Rap100ng-40h	0.999189	-0.00116984	0.910222	-0.13571	0.987698	-0.0178579	0.933757	-0.0988812	48	0.986409	0.989853	0.00442919	0.276709	FALSE
SPNCRNA.1425	SDS0.001-40h	0.94933	-0.0750189	0.864802	-0.209559	0.935124	-0.0967708	0.884054	-0.177794	72	0.10384	0.169111	0.771828	0.194688	FALSE
SPNCRNA.1425	SDS0.005-40h	1.01743	0.0249327	0.92684	-0.109607	1.06061	0.0848977	1.00269	0.00387441	64	0.590961	0.807777	0.0927083	0.195868	FALSE
SPNCRNA.1425	Sorb1.2M-40h	0.927847	-0.108041	0.845232	-0.242581	0.867733	-0.204677	0.820344	-0.2857	16	0.123739	0.271274	0.566592	0.150321	FALSE
SPNCRNA.1425	TSA500nM-40h	0.869118	-0.202376	0.791732	-0.336917	0.943692	-0.0836127	0.892154	-0.164636	24	0.0526077	0.129028	0.889316	0.276692	FALSE
SPNCRNA.1425	Temp32C-40h	1.05478	0.0769478	0.960866	-0.0575922	1.00096	0.00138311	0.946294	-0.0796402	60	0.0380201	0.309592	0.50921	0.134325	FALSE
SPNCRNA.1425	Temp37C-40h	1.06277	0.087835	0.968145	-0.0467051	1.02793	0.0397448	0.971793	-0.0412785	44	0.0330947	0.0725538	1.13934	0.137895	FALSE
SPNCRNA.1425	Torin5uM-40h	0.952551	-0.0701312	0.867736	-0.204671	0.924413	-0.11339	0.873928	-0.194413	57	0.111379	0.295283	0.529762	0.161571	FALSE
SPNCRNA.1425	VPA3mM-40h	0.962046	-0.0558228	0.876385	-0.190363	0.988207	-0.017115	0.934238	-0.0981383	56	0.271192	0.429387	0.367151	0.199047	FALSE
SPNCRNA.1425	VPA5mM-40h	1.04418	0.0623708	0.951207	-0.0721692	1.03441	0.0488077	0.977917	-0.0322156	47	0.219793	0.305566	0.514895	0.192691	FALSE
SPNCRNA.144	Ant0.1ng-40h	0.971933	-0.0410715	1.02324	0.033148	0.996199	-0.00549373	1.02428	0.0346119	12	0.307197	0.547195	0.261858	0.0644778	FALSE
SPNCRNA.144	Ant1ng-40h	0.963403	-0.0537885	1.01426	0.020431	0.967287	-0.0479839	0.994554	-0.00787832	16	0.136376	0.287905	0.54075	0.0541315	FALSE
SPNCRNA.144	Bleo20ug-40h	0.959835	-0.0591415	1.01051	0.015078	0.994576	-0.00784598	1.02261	0.0322596	12	0.181235	0.286955	0.542186	0.0766883	FALSE
SPNCRNA.144	Caff10mM-40h	1.04776	0.0673051	1.10307	0.141525	1.07067	0.0985179	1.10085	0.138623	12	0.0332194	0.110517	0.95657	0.0284314	FALSE
SPNCRNA.144	Can60ug-40h	0.940544	-0.0884323	0.990197	-0.0142128	0.938923	-0.0909212	0.96539	-0.0508156	32	0.0461574	0.099282	1.00313	0.124511	FALSE
SPNCRNA.144	CoCl0.25mM-40h	1.02579	0.0367344	1.07994	0.110954	1.07337	0.102148	1.10363	0.142254	23	0.457915	0.779139	0.108385	0.139272	FALSE
SPNCRNA.144	Diam2mM-40h	0.991908	-0.0117224	1.04427	0.0624971	1.02741	0.0390155	1.05637	0.0791211	12	0.813977	0.867228	0.061867	0.0986715	FALSE
SPNCRNA.144	EGTA10mM-40h									0					FALSE
SPNCRNA.144	EMM_Arg-40h	0.938758	-0.0911746	0.988316	-0.0169551	0.930388	-0.104095	0.956615	-0.0639896	4	0.342631	0.650999	0.18642	0.111607	FALSE
SPNCRNA.144	EMM_Cyst-40h	0.912338	-0.13236	0.960501	-0.0581406	0.880026	-0.184382	0.904833	-0.144276	4	0.25685	0.488927	0.310756	0.130775	FALSE
SPNCRNA.144	EMM_Gal2-40h	0.97719	-0.0332884	1.02878	0.0409311	0.97015	-0.0437206	0.997497	-0.00361493	12	0.387913	0.561977	0.250281	0.0587839	FALSE
SPNCRNA.144	EMM_Glu-40h	1.02623	0.0373591	1.08041	0.111579	0.987148	-0.0186617	1.01497	0.0214439	24	0.386159	0.586961	0.231391	0.112662	FALSE
SPNCRNA.144	EMM_Gluc2-40h	0.912414	-0.132239	0.960582	-0.0580193	0.902863	-0.147421	0.928314	-0.107316	12	0.197051	0.408434	0.388879	0.22312	FALSE
SPNCRNA.144	EMM_Gluc3-40h	1.08058	0.1118	1.13762	0.18602	1.10672	0.14629	1.13792	0.186396	16	0.0378886	0.214753	0.66806	0.129831	FALSE
SPNCRNA.144	EMM_Gly3-40h	0.873927	-0.194416	0.920062	-0.120196	0.891279	-0.166051	0.916403	-0.125945	4	0.0029591	0.018741	1.72721	0.0498123	FALSE
SPNCRNA.144	EMM_NH4Cl-40h	1	0	1.05279	0.0742195	1	0	1.02819	0.0401056	83	1	1	0	0.198281	FALSE
SPNCRNA.144	EMM_Phe-40h	0.920347	-0.119751	0.968933	-0.0455314	0.932846	-0.10029	0.959142	-0.0601841	12	0.0363734	0.12958	0.887461	0.107117	FALSE
SPNCRNA.144	EMM_Pro-40h	1.02046	0.0292184	1.07433	0.103438	1.04209	0.059476	1.07146	0.0995816	12	0.338908	0.441347	0.35522	0.0183963	FALSE
SPNCRNA.144	H2O2_0.5mM-40h	0.972266	-0.0405765	1.02359	0.033643	0.991982	-0.0116139	1.01995	0.0284918	12	0.215922	0.378694	0.421712	0.0300949	FALSE
SPNCRNA.144	H2O2_1mM-40h	0.978907	-0.0307569	1.03058	0.0434626	0.994324	-0.00821201	1.02235	0.0318936	15	0.375118	0.763634	0.117115	0.0469612	FALSE
SPNCRNA.144	H2O2_3mM-40h	1.01033	0.0148309	1.06367	0.0890503	1.05227	0.0735095	1.08194	0.113615	12	0.694163	0.769515	0.113783	0.0583776	FALSE
SPNCRNA.144	HU10mM-40h	1.00474	0.00682441	1.05778	0.0810439	1.05971	0.0836733	1.08959	0.123779	36	0.861706	0.911618	0.0401869	0.111216	FALSE
SPNCRNA.144	HU20mM-40h	0.990789	-0.0133495	1.04309	0.06087	0.994039	-0.00862558	1.02206	0.03148	31	0.796503	0.899023	0.0462291	0.169633	FALSE
SPNCRNA.144	HU5mM-40h	0.963453	-0.0537138	1.01431	0.0205057	0.976376	-0.0344914	1.0039	0.00561422	36	0.115982	0.28287	0.548413	0.0646803	FALSE
SPNCRNA.144	MMS0.005-40h	0.98967	-0.0149809	1.04192	0.0592386	1.01246	0.0178628	1.041	0.0579684	36	0.672041	0.797058	0.0985103	0.0811539	FALSE
SPNCRNA.144	MMS0.0075-40h	0.996012	-0.00576453	1.04859	0.0684549	1.01961	0.0280143	1.04835	0.06812	36	0.876756	0.925464	0.0336404	0.095982	FALSE
SPNCRNA.144	Rap100ng-40h	0.985412	-0.0212011	1.03743	0.0530184	1.00807	0.0115937	1.03649	0.0516993	28	0.586935	0.779214	0.108343	0.0946745	FALSE
SPNCRNA.144	SDS0.001-40h	0.956319	-0.064436	1.0068	0.00978345	0.989007	-0.0159478	1.01689	0.0241579	36	0.130034	0.197651	0.704101	0.125005	FALSE
SPNCRNA.144	SDS0.005-40h	1.01828	0.0261376	1.07204	0.100357	1.03264	0.0463415	1.06175	0.0864471	28	0.445855	0.697392	0.156523	0.0667568	FALSE
SPNCRNA.144	Sorb1.2M-40h	0.891444	-0.165784	0.938505	-0.0915641	0.896293	-0.157957	0.921559	-0.117851	12	0.00702482	0.0405051	1.39249	0.110474	FALSE
SPNCRNA.144	TSA500nM-40h									0					FALSE
SPNCRNA.144	Temp32C-40h	1.05506	0.0773312	1.11076	0.151551	1.02851	0.0405584	1.0575	0.080664	24	0.129429	0.446386	0.350289	0.150097	FALSE
SPNCRNA.144	Temp37C-40h	1.069	0.0962564	1.12543	0.170476	1.0188	0.026872	1.04752	0.0669776	20	0.0570977	0.10332	0.985817	0.134461	FALSE
SPNCRNA.144	Torin5uM-40h	1.01819	0.0260087	1.07194	0.100228	1.06339	0.0886698	1.09337	0.128775	24	0.582103	0.799515	0.0971735	0.13177	FALSE
SPNCRNA.144	VPA3mM-40h	0.991983	-0.011612	1.04435	0.0626075	1.03096	0.0439936	1.06003	0.0840992	8	0.842821	0.897959	0.0467437	0.100687	FALSE
SPNCRNA.144	VPA5mM-40h	1.09363	0.129122	1.15136	0.203342	1.10687	0.14648	1.13807	0.186585	12	0.000381325	0.00161004	2.79316	0.0514539	TRUE
SPNCRNA.1443	Ant0.1ng-40h	0.968191	-0.0466357	1.03063	0.0435259	0.997152	-0.00411431	1.0458	0.0646024	36	0.11149	0.276302	0.558617	0.107509	FALSE
SPNCRNA.1443	Ant1ng-40h	0.987922	-0.0175313	1.05163	0.0726303	1.02549	0.0363175	1.07552	0.105034	36	0.52546	0.68071	0.167038	0.101596	FALSE
SPNCRNA.1443	Bleo20ug-40h	1.03125	0.0443996	1.09776	0.134561	1.05063	0.0712607	1.10189	0.139977	20	0.235562	0.331532	0.479474	0.11248	FALSE
SPNCRNA.1443	Caff10mM-40h	1.04836	0.0681398	1.11597	0.158301	1.05972	0.083687	1.11142	0.152404	36	0.0044246	0.0296709	1.52767	0.082824	FALSE
SPNCRNA.1443	Can60ug-40h	0.967081	-0.0482909	1.02945	0.0418707	1.00915	0.0131408	1.05838	0.0818575	24	0.255659	0.364315	0.438523	0.138187	FALSE
SPNCRNA.1443	CoCl0.25mM-40h	0.982079	-0.0260897	1.04541	0.064072	0.978844	-0.0308485	1.0266	0.0378682	12	0.445282	0.779139	0.108385	0.0756633	FALSE
SPNCRNA.1443	Diam2mM-40h	1.05947	0.0833384	1.12779	0.1735	1.08613	0.119193	1.13911	0.18791	12	0.000349478	0.00398405	2.39968	0.0406454	TRUE
SPNCRNA.1443	EGTA10mM-40h	1.0608	0.0851571	1.12921	0.175319	1.08853	0.12238	1.14163	0.191097	12	0.0122817	0.0417577	1.37926	0.0711351	FALSE
SPNCRNA.1443	EMM_Arg-40h	1.06183	0.0865539	1.13031	0.176716	1.00599	0.00860912	1.05506	0.0773258	24	0.251205	0.530321	0.275461	0.269206	FALSE
SPNCRNA.1443	EMM_Cyst-40h	1.05407	0.0759701	1.12205	0.166132	1.09237	0.127463	1.14566	0.19618	12	0.0404474	0.162031	0.790402	0.0811614	FALSE
SPNCRNA.1443	EMM_Gal2-40h	0.985334	-0.0213153	1.04888	0.0688463	0.982053	-0.0261269	1.02996	0.0425898	24	0.38733	0.561977	0.250281	0.0696151	FALSE
SPNCRNA.1443	EMM_Glu-40h	0.99101	-0.013029	1.05492	0.0771326	1.03701	0.0524324	1.0876	0.121149	35	0.612818	0.796105	0.0990294	0.0907899	FALSE
SPNCRNA.1443	EMM_Gluc2-40h	1.03009	0.0427732	1.09652	0.132935	1.05232	0.073579	1.10366	0.142296	12	0.161424	0.379017	0.421341	0.0661483	FALSE
SPNCRNA.1443	EMM_Gluc3-40h	0.994669	-0.00771228	1.05881	0.0824494	0.998949	-0.00151674	1.04768	0.0672	12	0.859455	0.918482	0.0369296	0.102271	FALSE
SPNCRNA.1443	EMM_Gly3-40h	0.944697	-0.0820763	1.00562	0.00808529	0.965757	-0.0502686	1.01287	0.0184481	21	0.0514204	0.145841	0.836121	0.122566	FALSE
SPNCRNA.1443	EMM_NH4Cl-40h	1	0	1.06449	0.0901616	1	0	1.04878	0.0687167	124	1	1	0	0.121483	FALSE
SPNCRNA.1443	EMM_Phe-40h	1.06886	0.0960737	1.13779	0.186235	1.0331	0.0469817	1.0835	0.115698	24	0.0691226	0.196999	0.705535	0.182045	FALSE
SPNCRNA.1443	EMM_Pro-40h	1.16607	0.221658	1.24127	0.311819	1.19134	0.252583	1.24946	0.3213	35	8.84294e-09	1.44014e-07	6.8416	0.137333	TRUE
SPNCRNA.1443	H2O2_0.5mM-40h	0.996141	-0.00557849	1.06038	0.0845831	1.00477	0.00686852	1.05379	0.0755852	36	0.868781	0.884295	0.0534029	0.133272	FALSE
SPNCRNA.1443	H2O2_1mM-40h	0.990295	-0.0140692	1.05416	0.0760925	1.01398	0.0200293	1.06345	0.088746	24	0.658458	0.843681	0.0738218	0.100214	FALSE
SPNCRNA.1443	H2O2_3mM-40h	1.05612	0.0787688	1.12422	0.16893	1.02835	0.0403322	1.07852	0.109049	24	0.127965	0.247255	0.606855	0.178578	FALSE
SPNCRNA.1443	HU10mM-40h	1.09117	0.125875	1.16154	0.216037	1.13623	0.184256	1.19166	0.252972	24	0.000176172	0.000873203	3.05889	0.100786	TRUE
SPNCRNA.1443	HU20mM-40h	1.15559	0.208629	1.23011	0.298791	1.15384	0.206437	1.21012	0.275154	20	6.17151e-07	2.65278e-05	4.5763	0.104737	TRUE
SPNCRNA.1443	HU5mM-40h	1.02711	0.0385859	1.09334	0.128747	1.02452	0.0349458	1.0745	0.103663	36	0.0849379	0.236169	0.626778	0.0748445	FALSE
SPNCRNA.1443	MMS0.005-40h	1.00399	0.00574181	1.06873	0.0959035	1.04927	0.0693814	1.10045	0.138098	32	0.855206	0.920413	0.0360175	0.115462	FALSE
SPNCRNA.1443	MMS0.0075-40h	1.00527	0.00758406	1.0701	0.0977457	1.0052	0.00747947	1.05423	0.0761962	24	0.833627	0.920675	0.0358936	0.118315	FALSE
SPNCRNA.1443	Rap100ng-40h	1.03228	0.0458336	1.09885	0.135995	1.02645	0.0376571	1.07652	0.106374	36	0.110065	0.418246	0.378568	0.109052	FALSE
SPNCRNA.1443	SDS0.001-40h	1.13265	0.179702	1.20569	0.269863	1.14287	0.192656	1.19862	0.261373	20	5.86711e-13	6.68851e-11	10.1747	0.0502066	TRUE
SPNCRNA.1443	SDS0.005-40h	1.09018	0.124569	1.16049	0.21473	1.12161	0.165572	1.17633	0.234289	20	0.016433	0.0780568	1.10759	0.158375	FALSE
SPNCRNA.1443	Sorb1.2M-40h	0.964016	-0.0528711	1.02618	0.0372905	0.996031	-0.00573756	1.04462	0.0629791	12	0.0881204	0.205015	0.688215	0.0636118	FALSE
SPNCRNA.1443	TSA500nM-40h	0.987596	-0.0180075	1.05129	0.0721542	1.00927	0.0133064	1.0585	0.0820231	24	0.56233	0.673212	0.171848	0.0969208	FALSE
SPNCRNA.1443	Temp32C-40h	0.960336	-0.0583888	1.02227	0.0317728	0.970931	-0.0425586	1.0183	0.0261581	28	0.10685	0.392934	0.405681	0.122506	FALSE
SPNCRNA.1443	Temp37C-40h	1.03272	0.0464499	1.09932	0.136612	1.03634	0.0515002	1.0869	0.120217	35	0.117922	0.160037	0.795781	0.112664	FALSE
SPNCRNA.1443	Torin5uM-40h	1.0447	0.063094	1.11208	0.153256	1.06761	0.0943875	1.11969	0.163104	24	0.020374	0.116034	0.935413	0.0809684	FALSE
SPNCRNA.1443	VPA3mM-40h	0.993191	-0.00985703	1.05724	0.0803046	1.05136	0.0722601	1.10265	0.140977	32	0.817649	0.880387	0.0553265	0.165533	FALSE
SPNCRNA.1443	VPA5mM-40h	1.01659	0.0237317	1.08214	0.113893	1.02412	0.0343897	1.07408	0.103106	11	0.700931	0.775787	0.110257	0.144154	FALSE
SPNCRNA.145	Ant0.1ng-40h	0.989149	-0.0157401	1.05586	0.0784136	1.00664	0.0095409	1.07373	0.102625	36	0.517313	0.750724	0.12452	0.0722311	FALSE
SPNCRNA.145	Ant1ng-40h	0.945587	-0.0807186	1.00936	0.0134351	0.960992	-0.0574039	1.02504	0.03568	36	0.00856084	0.0504757	1.29692	0.102407	FALSE
SPNCRNA.145	Bleo20ug-40h	1.05743	0.0805651	1.12874	0.174719	1.03367	0.0477825	1.10257	0.140866	20	0.0430948	0.101685	0.992744	0.115644	FALSE
SPNCRNA.145	Caff10mM-40h	1.04243	0.0599541	1.11273	0.154108	1.04479	0.0632179	1.11443	0.156302	33	0.0422643	0.123542	0.908186	0.100612	FALSE
SPNCRNA.145	Can60ug-40h	1.06661	0.0930274	1.13854	0.187181	1.06244	0.0873771	1.13325	0.180461	24	0.0395432	0.0901585	1.04499	0.148985	FALSE
SPNCRNA.145	CoCl0.25mM-40h	0.992946	-0.0102135	1.05991	0.0839402	1.03941	0.0557692	1.10869	0.148853	12	0.874125	0.967478	0.014359	0.15487	FALSE
SPNCRNA.145	Diam2mM-40h	0.938495	-0.0915784	1.00179	0.00257527	0.957827	-0.0621632	1.02166	0.0309207	12	0.176247	0.2768	0.557834	0.152375	FALSE
SPNCRNA.145	EGTA10mM-40h	1.03607	0.0511182	1.10594	0.145272	1.03529	0.0500387	1.10429	0.143123	12	0.107468	0.192388	0.715822	0.0654065	FALSE
SPNCRNA.145	EMM_Arg-40h	0.876899	-0.189518	0.936036	-0.0953641	0.875648	-0.191578	0.934008	-0.0984938	24	0.000539161	0.00365859	2.43669	0.154201	TRUE
SPNCRNA.145	EMM_Cyst-40h	1.02239	0.0319467	1.09134	0.1261	0.986708	-0.0193042	1.05247	0.0737797	12	0.516035	0.73535	0.133506	0.115744	FALSE
SPNCRNA.145	EMM_Gal2-40h	0.801764	-0.318751	0.855834	-0.224597	0.897235	-0.156442	0.957034	-0.0633577	24	0.000676698	0.00620931	2.20696	0.260699	TRUE
SPNCRNA.145	EMM_Glu-40h	1.00333	0.00480226	1.071	0.0989559	1.00082	0.00118868	1.06753	0.0942726	36	0.879726	0.937278	0.0281317	0.116351	FALSE
SPNCRNA.145	EMM_Gluc2-40h	0.96891	-0.0455657	1.03425	0.048588	1.00781	0.0112203	1.07498	0.104304	12	0.527339	0.780735	0.107496	0.170884	FALSE
SPNCRNA.145	EMM_Gluc3-40h	0.92537	-0.111897	0.987776	-0.0177435	0.967708	-0.0473557	1.0322	0.0457282	12	0.093293	0.312806	0.504725	0.145634	FALSE
SPNCRNA.145	EMM_Gly3-40h	0.879609	-0.185065	0.938929	-0.0909118	1.00767	0.0110295	1.07483	0.104113	24	0.113498	0.231049	0.636296	0.378019	FALSE
SPNCRNA.145	EMM_NH4Cl-40h	1	0	1.06744	0.0941537	1	0	1.06665	0.0930839	122	1	1	0	0.145351	FALSE
SPNCRNA.145	EMM_Phe-40h	1.08741	0.120895	1.16074	0.215049	1.05041	0.0709518	1.12042	0.164036	24	0.00739822	0.0351415	1.45418	0.146436	FALSE
SPNCRNA.145	EMM_Pro-40h	1.15328	0.205739	1.23105	0.299893	1.14285	0.192636	1.21902	0.28572	35	2.67931e-06	1.13126e-05	4.94644	0.165477	TRUE
SPNCRNA.145	H2O2_0.5mM-40h	0.961274	-0.0569797	1.0261	0.037174	0.95325	-0.0690741	1.01678	0.0240097	36	0.197715	0.355832	0.448755	0.172835	FALSE
SPNCRNA.145	H2O2_1mM-40h	0.994215	-0.00837044	1.06126	0.0857832	0.974159	-0.037771	1.03908	0.0553129	24	0.826735	0.908971	0.0414502	0.121157	FALSE
SPNCRNA.145	H2O2_3mM-40h	1.03387	0.048061	1.1036	0.142215	0.994733	-0.00761851	1.06103	0.0854654	24	0.309286	0.470115	0.327796	0.158787	FALSE
SPNCRNA.145	HU10mM-40h	1.14157	0.19102	1.21856	0.285173	1.1596	0.213633	1.23689	0.306716	24	4.84908e-05	0.000345497	3.46156	0.144639	TRUE
SPNCRNA.145	HU20mM-40h	1.12768	0.173354	1.20373	0.267508	1.13964	0.18858	1.2156	0.281664	20	0.00011618	0.00110371	2.95715	0.123177	TRUE
SPNCRNA.145	HU5mM-40h	0.973326	-0.0390054	1.03897	0.0551483	1.0131	0.0187815	1.08062	0.111865	36	0.352114	0.521312	0.282902	0.16394	FALSE
SPNCRNA.145	MMS0.005-40h	1.04125	0.0583121	1.11147	0.152466	1.06359	0.0889433	1.13448	0.182027	32	0.0847011	0.311393	0.506692	0.120857	FALSE
SPNCRNA.145	MMS0.0075-40h	0.992001	-0.0115869	1.0589	0.0825668	1.01519	0.0217454	1.08285	0.114829	23	0.764191	0.871178	0.0598933	0.119861	FALSE
SPNCRNA.145	Rap100ng-40h	1.02971	0.0422451	1.09916	0.136399	1.00621	0.00893763	1.07328	0.102022	36	0.448779	0.700833	0.154386	0.236111	FALSE
SPNCRNA.145	SDS0.001-40h	1.05002	0.0704169	1.12083	0.164571	1.0447	0.0630871	1.11433	0.156171	19	0.0250824	0.0571878	1.2427	0.081744	FALSE
SPNCRNA.145	SDS0.005-40h	1.10113	0.138989	1.17539	0.233143	1.09496	0.130883	1.16794	0.223967	20	0.000124007	0.00201955	2.69475	0.0953253	TRUE
SPNCRNA.145	Sorb1.2M-40h	0.878763	-0.186453	0.938026	-0.0922995	0.97854	-0.0312972	1.04376	0.0617867	9	0.173912	0.314698	0.502106	0.258266	FALSE
SPNCRNA.145	TSA500nM-40h	0.851663	-0.231646	0.909098	-0.137492	0.878496	-0.186892	0.937046	-0.0938079	24	0.000129197	0.00109817	2.95933	0.164874	TRUE
SPNCRNA.145	Temp32C-40h	0.960117	-0.0587185	1.02487	0.0354352	0.952925	-0.0695651	1.01644	0.0235188	28	0.0788334	0.392934	0.405681	0.104705	FALSE
SPNCRNA.145	Temp37C-40h	1.03723	0.0527408	1.10718	0.146894	1.01098	0.0157604	1.07836	0.108844	36	0.110492	0.15361	0.81358	0.124471	FALSE
SPNCRNA.145	Torin5uM-40h	0.988404	-0.0168272	1.05506	0.0773264	0.963595	-0.0535006	1.02782	0.0395833	24	0.63724	0.81915	0.0866368	0.110147	FALSE
SPNCRNA.145	VPA3mM-40h	1.0482	0.0679176	1.11889	0.162071	1.08266	0.114586	1.15482	0.20767	32	0.179376	0.350399	0.455437	0.19955	FALSE
SPNCRNA.145	VPA5mM-40h	1.12263	0.166888	1.19834	0.261042	1.18041	0.239291	1.25908	0.332375	12	0.027944	0.0539934	1.26766	0.176642	FALSE
SPNCRNA.1460	Ant0.1ng-40h	0.986611	-0.019447	1.03892	0.055089	1.00812	0.0116611	1.04846	0.0682705	36	0.410947	0.633081	0.198541	0.0748323	FALSE
SPNCRNA.1460	Ant1ng-40h	0.989546	-0.0151614	1.04201	0.0593745	1.00228	0.00328572	1.04239	0.0598951	36	0.459689	0.623863	0.20491	0.0551183	FALSE
SPNCRNA.1460	Bleo20ug-40h	1.07649	0.106336	1.13357	0.180872	1.06559	0.0916576	1.10824	0.148267	20	0.00102865	0.00837615	2.07696	0.085959	TRUE
SPNCRNA.1460	Caff10mM-40h	1.02995	0.0425762	1.08456	0.117112	1.02365	0.0337184	1.06461	0.0903277	35	0.117418	0.273177	0.563557	0.0954368	FALSE
SPNCRNA.1460	Can60ug-40h	1.09242	0.127522	1.15034	0.202058	1.11439	0.156252	1.15898	0.212862	24	0.000145657	0.000936677	3.02841	0.0982463	TRUE
SPNCRNA.1460	CoCl0.25mM-40h	1.05194	0.073056	1.10772	0.147592	1.06105	0.0854968	1.10351	0.142106	12	0.00158873	0.0301858	1.5202	0.0390319	FALSE
SPNCRNA.1460	Diam2mM-40h	1.04029	0.0569832	1.09545	0.131519	1.04585	0.0646817	1.08771	0.121291	12	0.0256439	0.0702433	1.15339	0.0479048	FALSE
SPNCRNA.1460	EGTA10mM-40h	0.984963	-0.0218586	1.03719	0.0526774	1.0071	0.0102042	1.0474	0.0668136	12	0.398095	0.554722	0.255924	0.0495844	FALSE
SPNCRNA.1460	EMM_Arg-40h	0.882797	-0.179846	0.929605	-0.105311	0.892	-0.164884	0.927697	-0.108275	24	8.17751e-06	0.000155373	3.80863	0.102808	TRUE
SPNCRNA.1460	EMM_Cyst-40h	1.00388	0.00558146	1.0571	0.0801174	1.03116	0.0442636	1.07242	0.100873	12	0.905803	0.979675	0.0089178	0.110193	FALSE
SPNCRNA.1460	EMM_Gal2-40h	0.956087	-0.0647859	1.00678	0.00975009	0.938479	-0.0916038	0.976035	-0.0349945	23	0.151632	0.30943	0.509437	0.139889	FALSE
SPNCRNA.1460	EMM_Glu-40h	1.05059	0.0711984	1.10629	0.145734	1.0692	0.0965378	1.11199	0.153147	36	0.0549336	0.337825	0.471308	0.146957	FALSE
SPNCRNA.1460	EMM_Gluc2-40h	0.982561	-0.025381	1.03466	0.0491549	1.01251	0.0179399	1.05303	0.0745493	12	0.387001	0.668457	0.174927	0.0597569	FALSE
SPNCRNA.1460	EMM_Gluc3-40h	0.92619	-0.11062	0.975299	-0.0360837	0.922018	-0.117133	0.958916	-0.0605238	12	4.35986e-05	0.00248512	2.60465	0.0420133	TRUE
SPNCRNA.1460	EMM_Gly3-40h	0.972167	-0.0407236	1.02371	0.0338123	0.977432	-0.0329311	1.01655	0.0236783	21	0.506019	0.607223	0.216652	0.191503	FALSE
SPNCRNA.1460	EMM_NH4Cl-40h	1	0	1.05302	0.074536	1	0	1.04002	0.0566094	124	1	1	0	0.129884	FALSE
SPNCRNA.1460	EMM_Phe-40h	0.97972	-0.029558	1.03167	0.044978	0.990929	-0.0131467	1.03058	0.0434627	24	0.421769	0.631482	0.199639	0.115328	FALSE
SPNCRNA.1460	EMM_Pro-40h	1.16167	0.216197	1.22326	0.290733	1.17076	0.227442	1.21761	0.284052	36	2.39212e-07	1.43527e-06	5.84307	0.155933	TRUE
SPNCRNA.1460	H2O2_0.5mM-40h	1.04764	0.0671405	1.10319	0.141676	1.08838	0.122189	1.13194	0.178798	35	0.137203	0.284383	0.546096	0.183491	FALSE
SPNCRNA.1460	H2O2_1mM-40h	1.02428	0.0346133	1.07859	0.109149	1.04513	0.0636855	1.08696	0.120295	24	0.440663	0.791953	0.101301	0.149774	FALSE
SPNCRNA.1460	H2O2_3mM-40h	1.03758	0.0532233	1.0926	0.127759	1.02812	0.0400045	1.06926	0.0966138	24	0.201912	0.333594	0.476781	0.137334	FALSE
SPNCRNA.1460	HU10mM-40h	1.08956	0.123748	1.14733	0.198284	1.10067	0.138381	1.14472	0.19499	24	0.000744571	0.00257215	2.5897	0.111611	TRUE
SPNCRNA.1460	HU20mM-40h	1.10685	0.146454	1.16553	0.22099	1.08304	0.115083	1.12638	0.171693	20	0.0156243	0.0395816	1.40251	0.184894	FALSE
SPNCRNA.1460	HU5mM-40h	1.01487	0.0212993	1.06868	0.0958352	1.02322	0.0331212	1.06417	0.0897305	36	0.416334	0.585952	0.232138	0.0912738	FALSE
SPNCRNA.1460	MMS0.005-40h	1.00998	0.0143211	1.06353	0.088857	1.03146	0.0446834	1.07273	0.101293	32	0.576693	0.706914	0.150633	0.0829479	FALSE
SPNCRNA.1460	MMS0.0075-40h	1.03328	0.0472289	1.08807	0.121765	1.07077	0.0986423	1.11362	0.155252	24	0.139219	0.387097	0.41218	0.0984139	FALSE
SPNCRNA.1460	Rap100ng-40h	0.975615	-0.0356165	1.02734	0.0389195	0.931436	-0.102472	0.968711	-0.0458623	36	0.316612	0.649102	0.187687	0.135435	FALSE
SPNCRNA.1460	SDS0.001-40h	1.01421	0.0203571	1.06799	0.094893	1.03361	0.047694	1.07498	0.104303	20	0.611962	0.658147	0.181677	0.119488	FALSE
SPNCRNA.1460	SDS0.005-40h	1.04102	0.0580019	1.09622	0.132538	1.07893	0.109606	1.12211	0.166215	20	0.113424	0.311907	0.505975	0.106237	FALSE
SPNCRNA.1460	Sorb1.2M-40h	1.04312	0.0609	1.09842	0.135436	1.06465	0.0903736	1.10725	0.146983	12	0.474436	0.61838	0.208745	0.20902	FALSE
SPNCRNA.1460	TSA500nM-40h	0.934848	-0.0971965	0.984416	-0.0226606	0.960245	-0.0585257	0.998673	-0.00191638	24	0.00877961	0.0324464	1.48883	0.107258	FALSE
SPNCRNA.1460	Temp32C-40h	0.976462	-0.0343644	1.02824	0.0401716	1.01691	0.0241963	1.05761	0.0808057	28	0.343973	0.676085	0.169999	0.122338	FALSE
SPNCRNA.1460	Temp37C-40h	1.1039	0.142605	1.16243	0.217141	1.11171	0.152778	1.1562	0.209387	36	0.00110125	0.00660749	2.17996	0.175238	TRUE
SPNCRNA.1460	Torin5uM-40h	1.01501	0.0214991	1.06883	0.0960351	1.0553	0.077657	1.09753	0.134266	24	0.539985	0.759978	0.119199	0.111382	FALSE
SPNCRNA.1460	VPA3mM-40h	1.03335	0.0473228	1.08814	0.121859	1.02233	0.0318671	1.06325	0.0884765	32	0.193982	0.368566	0.433484	0.13552	FALSE
SPNCRNA.1460	VPA5mM-40h	1.11361	0.155248	1.17266	0.229784	1.10468	0.143625	1.14889	0.200235	12	0.00172227	0.00476765	2.3217	0.100768	TRUE
SPNCRNA.1519	Ant0.1ng-40h	1.02175	0.0310419	0.994097	-0.00854176	1.02849	0.0405319	0.98679	-0.0191851	33	0.24252	0.48504	0.314223	0.0715051	FALSE
SPNCRNA.1519	Ant1ng-40h	1.00517	0.00744116	0.977967	-0.0321425	1.01457	0.0208718	0.973434	-0.0388452	52	0.776692	0.840584	0.0754187	0.086554	FALSE
SPNCRNA.1519	Bleo20ug-40h	0.944165	-0.0828894	0.918612	-0.122473	0.906099	-0.14226	0.869358	-0.201977	33	0.0441673	0.101685	0.992744	0.13175	FALSE
SPNCRNA.1519	Caff10mM-40h	1.04011	0.0567368	1.01196	0.0171532	1.08031	0.111443	1.0365	0.0517264	48	0.158032	0.335821	0.473892	0.166817	FALSE
SPNCRNA.1519	Can60ug-40h	0.995364	-0.00670342	0.968425	-0.0462871	0.990042	-0.0144382	0.949898	-0.0741552	56	0.847676	0.88656	0.0522916	0.1457	FALSE
SPNCRNA.1519	CoCl0.25mM-40h	1.00921	0.0132247	0.981895	-0.0263589	1.03452	0.0489637	0.992574	-0.0107533	36	0.695917	0.862331	0.0643258	0.112536	FALSE
SPNCRNA.1519	Diam2mM-40h	0.994675	-0.00770302	0.967755	-0.0472867	1.04193	0.059265	0.999687	-0.000452058	21	0.860707	0.900189	0.0456663	0.120173	FALSE
SPNCRNA.1519	EGTA10mM-40h	0.838093	-0.254818	0.815411	-0.294402	0.974139	-0.037801	0.93464	-0.0975181	12	0.0533698	0.10801	0.966535	0.250037	FALSE
SPNCRNA.1519	EMM_Arg-40h	0.897743	-0.155625	0.873446	-0.195209	1.03922	0.0555018	0.997082	-0.00421525	4	0.572683	0.824317	0.0839057	0.314617	FALSE
SPNCRNA.1519	EMM_Cyst-40h	1.07582	0.105442	1.04671	0.0658584	1.08505	0.117759	1.04105	0.0580418	16	0.015174	0.0720764	1.14221	0.100127	FALSE
SPNCRNA.1519	EMM_Gal2-40h	0.956425	-0.0642768	0.93054	-0.103861	0.959561	-0.0595543	0.920653	-0.119271	36	0.149652	0.30943	0.509437	0.155528	FALSE
SPNCRNA.1519	EMM_Glu-40h	1.02497	0.0355883	0.997234	-0.00399539	1.01963	0.0280408	0.978283	-0.0316762	60	0.168716	0.465363	0.332208	0.0915991	FALSE
SPNCRNA.1519	EMM_Gluc2-40h	0.899786	-0.152345	0.875434	-0.191929	0.96302	-0.0543625	0.923972	-0.11408	20	0.0394251	0.193731	0.712801	0.190803	FALSE
SPNCRNA.1519	EMM_Gluc3-40h	0.988382	-0.0168592	0.961632	-0.0564428	1.01383	0.0198088	0.972717	-0.0399083	32	0.636158	0.873759	0.0586083	0.112513	FALSE
SPNCRNA.1519	EMM_Gly3-40h	1.01081	0.0155161	0.983456	-0.0240676	1.02096	0.0299236	0.979561	-0.0297935	16	0.544813	0.640295	0.19362	0.0454842	FALSE
SPNCRNA.1519	EMM_NH4Cl-40h	1	0	0.972936	-0.0395837	1	0	0.959452	-0.059717	212	1	1	0	0.189644	FALSE
SPNCRNA.1519	EMM_Phe-40h	1.04092	0.0578633	1.01275	0.0182796	1.03016	0.0428717	0.988392	-0.0168453	40	0.0978544	0.252658	0.597467	0.125687	FALSE
SPNCRNA.1519	EMM_Pro-40h	1.07708	0.107125	1.04793	0.067541	1.04576	0.0645472	1.00335	0.00483014	28	0.108152	0.184019	0.735137	0.229997	FALSE
SPNCRNA.1519	H2O2_0.5mM-40h	1.04203	0.0594001	1.01383	0.0198164	1.02074	0.0296224	0.979356	-0.0300946	40	0.0729589	0.224792	0.648218	0.1162	FALSE
SPNCRNA.1519	H2O2_1mM-40h	1.02425	0.0345635	0.996526	-0.0050202	1.02194	0.0313163	0.980507	-0.0284007	40	0.319125	0.713201	0.146788	0.123927	FALSE
SPNCRNA.1519	H2O2_3mM-40h	0.999745	-0.000368225	0.972687	-0.0399519	1.03526	0.0499963	0.993285	-0.00972074	28	0.991945	0.996034	0.00172577	0.109649	FALSE
SPNCRNA.1519	HU10mM-40h	1.00578	0.00831192	0.978557	-0.0312717	1.00585	0.00841327	0.965064	-0.0513038	72	0.793344	0.886679	0.0522336	0.144327	FALSE
SPNCRNA.1519	HU20mM-40h	1.00938	0.0134676	0.982061	-0.0261161	1.05553	0.0779691	1.01273	0.0182521	64	0.650248	0.780297	0.10774	0.122338	FALSE
SPNCRNA.1519	HU5mM-40h	1.02233	0.0318632	0.994663	-0.00772045	1.05055	0.0711463	1.00795	0.0114293	72	0.202515	0.368285	0.433816	0.0927483	FALSE
SPNCRNA.1519	MMS0.005-40h	0.948851	-0.0757461	0.923171	-0.11533	0.999705	-0.00042626	0.959169	-0.0601433	72	0.046985	0.262518	0.580841	0.179196	FALSE
SPNCRNA.1519	MMS0.0075-40h	1.03902	0.0552257	1.0109	0.015642	1.0446	0.0629511	1.00224	0.00323411	72	0.0524961	0.21749	0.66256	0.122654	FALSE
SPNCRNA.1519	Rap100ng-40h	1.09095	0.125592	1.06143	0.0860079	1.12391	0.168524	1.07834	0.108807	45	0.0291512	0.237374	0.624566	0.250224	FALSE
SPNCRNA.1519	SDS0.001-40h	0.954474	-0.0672218	0.928642	-0.106805	1.00432	0.00621693	0.963596	-0.0535001	71	0.0629003	0.117096	0.931458	0.166029	FALSE
SPNCRNA.1519	SDS0.005-40h	0.994298	-0.0082495	0.967388	-0.0478332	1.01276	0.0182993	0.9717	-0.0414177	64	0.774509	0.932814	0.0302047	0.11431	FALSE
SPNCRNA.1519	Sorb1.2M-40h	0.925656	-0.111452	0.900604	-0.151036	0.923146	-0.115369	0.885715	-0.175086	16	0.0633492	0.156996	0.804112	0.137452	FALSE
SPNCRNA.1519	TSA500nM-40h	0.92206	-0.117068	0.897105	-0.156652	1.06818	0.0951559	1.02487	0.0354388	18	0.286765	0.459906	0.337331	0.287945	FALSE
SPNCRNA.1519	Temp32C-40h	1.05248	0.0737898	1.02399	0.0342062	1.06747	0.0941915	1.02418	0.0344744	60	0.00751188	0.142726	0.845498	0.105836	FALSE
SPNCRNA.1519	Temp37C-40h	1.07776	0.108034	1.04859	0.06845	1.03465	0.0491435	0.992698	-0.0105735	44	0.000342138	0.00243774	2.61301	0.104749	FALSE
SPNCRNA.1519	Torin5uM-40h	1.05551	0.0779391	1.02694	0.0383554	1.06288	0.0879787	1.01978	0.0282617	57	0.0279888	0.134292	0.87195	0.154341	FALSE
SPNCRNA.1519	VPA3mM-40h	0.97894	-0.0307076	0.952446	-0.0702912	1.00396	0.00569479	0.963247	-0.0540222	56	0.281784	0.440046	0.356502	0.10325	FALSE
SPNCRNA.1519	VPA5mM-40h	1.01512	0.0216453	0.987643	-0.0179384	1.07226	0.100657	1.02878	0.0409396	48	0.581894	0.663359	0.178251	0.160695	FALSE
SPNCRNA.1530	Ant0.1ng-40h	0.956907	-0.063549	1.00975	0.0139921	1.00859	0.0123379	1.00283	0.00407848	24	0.0903886	0.262599	0.580707	0.0919617	FALSE
SPNCRNA.1530	Ant1ng-40h	0.96558	-0.0505319	1.0189	0.0270092	1.0239	0.0340803	1.01806	0.0258209	35	0.0969271	0.237211	0.624865	0.0654034	FALSE
SPNCRNA.1530	Bleo20ug-40h	0.936848	-0.0941125	0.988579	-0.0165713	0.994466	-0.00800592	0.988789	-0.0162653	24	0.0115882	0.0440351	1.3562	0.0870358	FALSE
SPNCRNA.1530	Caff10mM-40h	0.999726	-0.000394785	1.05493	0.0771464	1.14839	0.199617	1.14184	0.191357	34	0.994579	0.994579	0.00236086	0.221022	FALSE
SPNCRNA.1530	Can60ug-40h	0.853313	-0.228854	0.900431	-0.151312	0.900652	-0.150958	0.89551	-0.159218	24	1.86198e-06	2.40585e-05	4.61873	0.110513	TRUE
SPNCRNA.1530	CoCl0.25mM-40h	0.912257	-0.132488	0.96263	-0.054947	0.991841	-0.0118193	0.986179	-0.0200786	11	0.0915187	0.346943	0.459742	0.15704	FALSE
SPNCRNA.1530	Diam2mM-40h	0.669863	-0.578061	0.706852	-0.50052	0.731429	-0.451211	0.727253	-0.45947	12	1.27507e-07	1.45358e-05	4.83756	0.126214	TRUE
SPNCRNA.1530	EGTA10mM-40h	0.943612	-0.0837342	0.995716	-0.00619308	1.06792	0.0947975	1.06182	0.0865381	12	0.220968	0.341496	0.466614	0.148058	FALSE
SPNCRNA.1530	EMM_Arg-40h									0					FALSE
SPNCRNA.1530	EMM_Cyst-40h	0.794869	-0.331211	0.83876	-0.25367	0.821073	-0.284417	0.816386	-0.292676	11	2.89532e-07	3.30067e-05	4.4814	0.0816397	TRUE
SPNCRNA.1530	EMM_Gal2-40h	0.911601	-0.133525	0.961938	-0.0559842	0.946256	-0.0796974	0.940854	-0.0879568	24	0.010958	0.0515939	1.2874	0.145439	FALSE
SPNCRNA.1530	EMM_Glu-40h	0.960839	-0.0576337	1.01389	0.0199075	1.05736	0.0804683	1.05133	0.0722089	36	0.217865	0.506869	0.295104	0.164742	FALSE
SPNCRNA.1530	EMM_Gluc2-40h	0.962701	-0.0548403	1.01586	0.0227008	1.03563	0.0505146	1.02972	0.0422552	8	0.448144	0.719555	0.142936	0.130343	FALSE
SPNCRNA.1530	EMM_Gluc3-40h	0.947361	-0.0780133	0.999673	-0.000472106	1.05681	0.079712	1.05077	0.0714526	16	0.357358	0.679934	0.167533	0.223144	FALSE
SPNCRNA.1530	EMM_Gly3-40h	0.856341	-0.223742	0.903627	-0.146201	0.907872	-0.139439	0.902689	-0.147699	12	3.99606e-09	4.5555e-07	6.34146	0.0449758	TRUE
SPNCRNA.1530	EMM_NH4Cl-40h	1	0	1.05522	0.0775412	1	0	0.994291	-0.00825938	127	1	1	0	0.211093	FALSE
SPNCRNA.1530	EMM_Phe-40h	0.814819	-0.295449	0.859812	-0.217908	0.870338	-0.200353	0.865369	-0.208612	28	1.33346e-13	1.52014e-11	10.8181	0.0748273	TRUE
SPNCRNA.1530	EMM_Pro-40h	0.939546	-0.0899641	0.991426	-0.012423	0.921498	-0.117947	0.916238	-0.126206	16	0.322979	0.433172	0.36334	0.239672	FALSE
SPNCRNA.1530	H2O2_0.5mM-40h	1.11525	0.157373	1.17684	0.234914	1.17316	0.230403	1.16647	0.222144	28	0.00263733	0.0355811	1.44878	0.176384	FALSE
SPNCRNA.1530	H2O2_1mM-40h	1.01911	0.027312	1.07538	0.104853	1.08322	0.115326	1.07704	0.107067	24	0.517353	0.797004	0.0985397	0.120668	FALSE
SPNCRNA.1530	H2O2_3mM-40h	0.98631	-0.0198866	1.04077	0.0576545	1.0302	0.0429252	1.02432	0.0346658	16	0.702013	0.769515	0.113783	0.129245	FALSE
SPNCRNA.1530	HU10mM-40h	0.860878	-0.21612	0.908414	-0.138579	0.947709	-0.0774845	0.942299	-0.0857439	36	8.42141e-05	0.000505285	3.29646	0.177509	TRUE
SPNCRNA.1530	HU20mM-40h	0.963513	-0.0536243	1.01672	0.0239168	1.06309	0.0882626	1.05702	0.0800032	31	0.210842	0.316263	0.499951	0.133971	FALSE
SPNCRNA.1530	HU5mM-40h	0.911046	-0.134404	0.961352	-0.0568629	0.98614	-0.0201354	0.980511	-0.0283948	36	1.92993e-05	0.000245526	3.6099	0.0610055	FALSE
SPNCRNA.1530	MMS0.005-40h	0.996905	-0.00447204	1.05195	0.0730691	1.0485	0.0683336	1.04252	0.0600742	36	0.889605	0.939027	0.0273217	0.0850141	FALSE
SPNCRNA.1530	MMS0.0075-40h	1.00563	0.00810594	1.06116	0.0856471	1.08028	0.111401	1.07411	0.103142	36	0.797304	0.899928	0.0457924	0.0811832	FALSE
SPNCRNA.1530	Rap100ng-40h	1.08225	0.114033	1.14201	0.191574	1.16077	0.215088	1.15415	0.206828	18	0.00979345	0.139557	0.85525	0.109637	FALSE
SPNCRNA.1530	SDS0.001-40h	0.950728	-0.0728951	1.00323	0.00464607	1.00219	0.00316063	0.996472	-0.00509876	36	0.0404766	0.0854506	1.06828	0.100336	FALSE
SPNCRNA.1530	SDS0.005-40h	0.856405	-0.223635	0.903694	-0.146094	0.911323	-0.133965	0.906121	-0.142225	36	4.85567e-10	5.53546e-08	7.25685	0.0775955	TRUE
SPNCRNA.1530	Sorb1.2M-40h	0.92189	-0.117333	0.972795	-0.0397916	0.953554	-0.068613	0.948111	-0.0768724	3	0.137047	0.278988	0.554415	0.0641934	FALSE
SPNCRNA.1530	TSA500nM-40h	0.877372	-0.188739	0.925819	-0.111198	0.924174	-0.113764	0.918898	-0.122023	24	1.34735e-06	5.53587e-05	4.25681	0.0812404	TRUE
SPNCRNA.1530	Temp32C-40h	1.06488	0.0906909	1.12368	0.168232	1.16648	0.222159	1.15982	0.213899	36	0.050592	0.346166	0.460716	0.173079	FALSE
SPNCRNA.1530	Temp37C-40h	1.01698	0.0242883	1.07313	0.101829	1.0131	0.0187825	1.00732	0.0105231	23	0.654453	0.697268	0.1566	0.167831	FALSE
SPNCRNA.1530	Torin5uM-40h	0.916372	-0.125995	0.966972	-0.0484534	1.00184	0.00265386	0.996122	-0.00560552	36	0.00226354	0.0234585	1.6297	0.125897	FALSE
SPNCRNA.1530	VPA3mM-40h	0.843603	-0.245363	0.890185	-0.167822	0.855878	-0.224523	0.850992	-0.232783	48	3.24423e-08	1.23281e-06	5.9091	0.143935	TRUE
SPNCRNA.1530	VPA5mM-40h	0.750831	-0.41344	0.792291	-0.335898	0.768939	-0.37906	0.764549	-0.387319	31	3.29013e-09	9.37686e-08	7.02794	0.178055	TRUE
SPNCRNA.1559	Ant0.1ng-40h	1.00996	0.0142981	1.02275	0.0324585	1.06138	0.0859384	1.05988	0.0839016	24	0.727895	0.846736	0.0722522	0.112191	FALSE
SPNCRNA.1559	Ant1ng-40h	0.903759	-0.145991	0.915207	-0.12783	0.965329	-0.050907	0.963967	-0.0529438	36	0.00230038	0.0276048	1.55901	0.152154	FALSE
SPNCRNA.1559	Bleo20ug-40h	0.816937	-0.291703	0.827285	-0.273543	0.911237	-0.134102	0.909951	-0.136139	24	0.000375689	0.00356904	2.44745	0.210893	TRUE
SPNCRNA.1559	Caff10mM-40h	0.986933	-0.018976	0.999435	-0.000815669	0.99133	-0.0125625	0.989932	-0.0145993	36	0.74758	0.86666	0.0621515	0.221702	FALSE
SPNCRNA.1559	Can60ug-40h	0.99026	-0.0141207	1.0028	0.00403961	1.00772	0.011099	1.0063	0.00906224	24	0.788373	0.855947	0.0675529	0.156777	FALSE
SPNCRNA.1559	CoCl0.25mM-40h	1.08229	0.114081	1.09599	0.132241	1.17038	0.226981	1.16873	0.224944	12	0.0924163	0.346943	0.459742	0.148619	FALSE
SPNCRNA.1559	Diam2mM-40h	0.850776	-0.233149	0.861553	-0.214989	0.869204	-0.202233	0.867978	-0.20427	12	0.00360391	0.0171186	1.76653	0.140162	FALSE
SPNCRNA.1559	EGTA10mM-40h	0.863949	-0.210982	0.874893	-0.192821	0.903384	-0.146588	0.90211	-0.148625	12	0.0232799	0.065489	1.18383	0.176846	FALSE
SPNCRNA.1559	EMM_Arg-40h									0					FALSE
SPNCRNA.1559	EMM_Cyst-40h	0.943975	-0.0831797	0.955932	-0.0650194	0.959489	-0.0596624	0.958135	-0.0616992	12	0.06664	0.230211	0.637874	0.0826511	FALSE
SPNCRNA.1559	EMM_Gal2-40h	0.896259	-0.158013	0.907612	-0.139852	0.901404	-0.149755	0.900132	-0.151791	22	0.0041796	0.0248577	1.60454	0.139034	FALSE
SPNCRNA.1559	EMM_Glu-40h	0.986834	-0.0191201	0.999335	-0.00095979	1.01863	0.0266283	1.01719	0.0245915	36	0.616277	0.796105	0.0990294	0.119371	FALSE
SPNCRNA.1559	EMM_Gluc2-40h	0.969764	-0.0442944	0.982048	-0.0261341	0.936089	-0.0952825	0.934768	-0.0973193	8	0.574872	0.800281	0.0967576	0.14021	FALSE
SPNCRNA.1559	EMM_Gluc3-40h	0.977618	-0.0326569	0.990002	-0.0144966	0.987726	-0.0178168	0.986333	-0.0198536	16	0.576423	0.801368	0.096168	0.143783	FALSE
SPNCRNA.1559	EMM_Gly3-40h	0.861115	-0.215723	0.872023	-0.197563	0.874138	-0.194068	0.872904	-0.196105	12	0.000663769	0.00756696	2.12108	0.104142	TRUE
SPNCRNA.1559	EMM_NH4Cl-40h	1	0	1.01267	0.0181604	1	0	0.998589	-0.00203681	124	1	1	0	0.195205	FALSE
SPNCRNA.1559	EMM_Phe-40h	0.844113	-0.244492	0.854805	-0.226332	0.889116	-0.169557	0.887861	-0.171594	27	3.23897e-05	0.000615404	3.21084	0.153165	TRUE
SPNCRNA.1559	EMM_Pro-40h	0.985286	-0.0213862	0.997767	-0.00322586	0.953827	-0.0682006	0.952481	-0.0702374	16	0.769039	0.842985	0.0741803	0.187484	FALSE
SPNCRNA.1559	H2O2_0.5mM-40h	1.08501	0.117707	1.09875	0.135868	1.04551	0.0642073	1.04404	0.0621705	28	0.0257841	0.117576	0.929683	0.174198	FALSE
SPNCRNA.1559	H2O2_1mM-40h	1.0294	0.0418002	1.04244	0.0599605	1.02984	0.042416	1.02838	0.0403792	24	0.2484	0.64452	0.190764	0.0912682	FALSE
SPNCRNA.1559	H2O2_3mM-40h	1.04684	0.0660357	1.0601	0.084196	1.04538	0.0640254	1.0439	0.0619886	16	0.188577	0.324911	0.488235	0.1218	FALSE
SPNCRNA.1559	HU10mM-40h	0.924152	-0.113797	0.935859	-0.0956369	1.01756	0.0251162	1.01613	0.0230794	35	0.0725703	0.133436	0.874728	0.224906	FALSE
SPNCRNA.1559	HU20mM-40h	1.07097	0.0989199	1.08454	0.11708	1.10954	0.149961	1.10797	0.147925	32	0.0638969	0.124186	0.905928	0.19018	FALSE
SPNCRNA.1559	HU5mM-40h	0.889184	-0.169446	0.900448	-0.151286	0.967864	-0.0471243	0.966498	-0.0491611	36	0.00202558	0.0135833	1.86699	0.180325	FALSE
SPNCRNA.1559	MMS0.005-40h	0.926065	-0.110814	0.937796	-0.0926537	1.03043	0.0432532	1.02898	0.0412164	36	0.0743007	0.30596	0.514335	0.22304	FALSE
SPNCRNA.1559	MMS0.0075-40h	0.972216	-0.0406508	0.984532	-0.0224904	0.996786	-0.00464369	0.99538	-0.0066805	36	0.406509	0.668406	0.17496	0.172484	FALSE
SPNCRNA.1559	Rap100ng-40h	0.875629	-0.191609	0.886721	-0.173448	1.01874	0.0267828	1.0173	0.024746	20	0.0749233	0.317214	0.498647	0.290796	FALSE
SPNCRNA.1559	SDS0.001-40h	0.979232	-0.0302773	0.991636	-0.0121169	1.01834	0.0262166	1.0169	0.0241798	36	0.401289	0.476531	0.321909	0.10659	FALSE
SPNCRNA.1559	SDS0.005-40h	0.945912	-0.0802218	0.957894	-0.0620615	1.00601	0.00864904	1.00459	0.00661223	36	0.0959187	0.287756	0.540976	0.163715	FALSE
SPNCRNA.1559	Sorb1.2M-40h	0.83526	-0.259703	0.84584	-0.241543	1.02899	0.0412359	1.02754	0.0391991	4	0.496798	0.61838	0.208745	0.431996	FALSE
SPNCRNA.1559	TSA500nM-40h	0.961148	-0.0571694	0.973323	-0.039009	1.0062	0.00891627	1.00478	0.00687947	21	0.411238	0.582587	0.234639	0.200498	FALSE
SPNCRNA.1559	Temp32C-40h	1.0508	0.0714856	1.06411	0.0896459	1.07804	0.108416	1.07652	0.106379	35	0.0844784	0.392934	0.405681	0.139805	FALSE
SPNCRNA.1559	Temp37C-40h	1.07578	0.10538	1.08941	0.123541	1.00672	0.00965939	1.0053	0.00762259	24	0.0683619	0.111332	0.953379	0.180363	FALSE
SPNCRNA.1559	Torin5uM-40h	0.883149	-0.179271	0.894336	-0.161111	0.942113	-0.0860281	0.940784	-0.0880649	36	0.00156867	0.0178828	1.74756	0.186552	FALSE
SPNCRNA.1559	VPA3mM-40h	0.867954	-0.204309	0.878949	-0.186149	0.899382	-0.152994	0.898113	-0.155031	48	3.30086e-07	6.27163e-06	5.20262	0.122406	TRUE
SPNCRNA.1559	VPA5mM-40h	0.874	-0.194295	0.885071	-0.176135	0.926753	-0.109743	0.925445	-0.11178	35	0.00430928	0.0096325	2.01626	0.229749	TRUE
SPNCRNA.1562	Ant0.1ng-40h	0.977487	-0.032851	0.982524	-0.0254361	0.997005	-0.00432799	1.01948	0.0278346	24	0.509629	0.750724	0.12452	0.136321	FALSE
SPNCRNA.1562	Ant1ng-40h	0.934752	-0.0973444	0.939569	-0.0899296	0.961881	-0.0560694	0.983566	-0.0239068	36	0.0257193	0.0888486	1.05135	0.127651	FALSE
SPNCRNA.1562	Bleo20ug-40h	0.936796	-0.0941936	0.941623	-0.0867788	1.03741	0.0529884	1.0608	0.085151	24	0.360451	0.47032	0.327607	0.320453	FALSE
SPNCRNA.1562	Caff10mM-40h	1.01378	0.0197439	1.019	0.0271587	1.01014	0.0145515	1.03291	0.0467141	36	0.663489	0.85748	0.0667761	0.149372	FALSE
SPNCRNA.1562	Can60ug-40h	1.0064	0.00919854	1.01158	0.0166134	1.02268	0.0323518	1.04573	0.0645144	24	0.882732	0.914831	0.0386592	0.188893	FALSE
SPNCRNA.1562	CoCl0.25mM-40h	0.70985	-0.494413	0.713508	-0.486998	0.755463	-0.404567	0.772494	-0.372405	9	0.0724068	0.294799	0.530474	0.421302	FALSE
SPNCRNA.1562	Diam2mM-40h	0.978234	-0.0317481	0.983275	-0.0243332	1.04261	0.0601954	1.06611	0.092358	12	0.728132	0.80229	0.0956684	0.202425	FALSE
SPNCRNA.1562	EGTA10mM-40h	0.652138	-0.61675	0.655499	-0.609335	0.710381	-0.493334	0.726396	-0.461172	12	0.000160954	0.00171013	2.76697	0.222144	TRUE
SPNCRNA.1562	EMM_Arg-40h									0					FALSE
SPNCRNA.1562	EMM_Cyst-40h	0.986374	-0.0197935	0.991456	-0.0123787	1.05783	0.081104	1.08167	0.113267	12	0.835989	0.931481	0.0308258	0.214171	FALSE
SPNCRNA.1562	EMM_Gal2-40h	0.923292	-0.115142	0.928049	-0.107727	0.972917	-0.0396116	0.99485	-0.00744894	24	0.0994243	0.229285	0.639625	0.201212	FALSE
SPNCRNA.1562	EMM_Glu-40h	1.0445	0.0628119	1.04988	0.0702267	1.01432	0.0205155	1.03719	0.0526781	36	0.141265	0.434774	0.361737	0.137121	FALSE
SPNCRNA.1562	EMM_Gluc2-40h	0.975194	-0.0362391	0.980219	-0.0288243	1.05867	0.082253	1.08254	0.114416	8	0.836571	0.973154	0.0118186	0.325362	FALSE
SPNCRNA.1562	EMM_Gluc3-40h	0.985383	-0.0212429	0.990461	-0.0138281	0.988774	-0.0162877	1.01106	0.0158749	16	0.799792	0.899536	0.0459814	0.214586	FALSE
SPNCRNA.1562	EMM_Gly3-40h	0.894107	-0.161481	0.898714	-0.154066	0.866817	-0.206201	0.886358	-0.174039	11	0.000869201	0.00860391	2.0653	0.0707567	TRUE
SPNCRNA.1562	EMM_NH4Cl-40h	1	0	1.00515	0.00741482	1	0	1.02254	0.0321626	126	1	1	0	0.220631	FALSE
SPNCRNA.1562	EMM_Phe-40h	0.950305	-0.0735374	0.955202	-0.0661226	0.987622	-0.0179693	1.00989	0.0141933	28	0.285347	0.500456	0.300634	0.220808	FALSE
SPNCRNA.1562	EMM_Pro-40h	0.963393	-0.0538043	0.968357	-0.0463895	0.883256	-0.179096	0.903168	-0.146933	16	0.538768	0.653399	0.184821	0.221582	FALSE
SPNCRNA.1562	H2O2_0.5mM-40h	1.03192	0.0453324	1.03724	0.0527472	0.976748	-0.0339414	0.998768	-0.00177873	28	0.25934	0.434776	0.361734	0.107415	FALSE
SPNCRNA.1562	H2O2_1mM-40h	1.01267	0.0181663	1.01789	0.0255812	0.98706	-0.0187909	1.00931	0.0133717	24	0.638621	0.836813	0.0773714	0.0908499	FALSE
SPNCRNA.1562	H2O2_3mM-40h	1.03496	0.0495799	1.0403	0.0569947	0.973449	-0.0388222	0.995395	-0.00665958	16	0.440274	0.570355	0.243855	0.16079	FALSE
SPNCRNA.1562	HU10mM-40h	0.977551	-0.032756	0.982588	-0.0253412	0.973976	-0.0380416	0.995933	-0.00587894	36	0.504377	0.672156	0.17253	0.163773	FALSE
SPNCRNA.1562	HU20mM-40h	1.00383	0.00552092	1.00901	0.0129357	0.991992	-0.0115993	1.01436	0.0205633	31	0.913496	0.955399	0.0198151	0.163444	FALSE
SPNCRNA.1562	HU5mM-40h	0.995332	-0.0067503	1.00046	0.000664517	1.05864	0.0822148	1.08251	0.114377	35	0.898822	0.930501	0.0312832	0.183745	FALSE
SPNCRNA.1562	MMS0.005-40h	0.932315	-0.101111	0.937119	-0.0936965	0.977831	-0.0323432	0.999875	-0.000180559	36	0.101246	0.326543	0.48606	0.214874	FALSE
SPNCRNA.1562	MMS0.0075-40h	0.993406	-0.00954501	0.998525	-0.0021302	1.01546	0.0221318	1.03835	0.0542944	35	0.832611	0.920675	0.0358936	0.143825	FALSE
SPNCRNA.1562	Rap100ng-40h	1.0878	0.121418	1.09341	0.128833	1.0321	0.0455777	1.05536	0.0777404	20	0.0648534	0.317214	0.498647	0.185691	FALSE
SPNCRNA.1562	SDS0.001-40h	1.01639	0.023452	1.02163	0.0308668	0.977327	-0.0330867	0.99936	-0.000924115	35	0.539956	0.597621	0.223574	0.107768	FALSE
SPNCRNA.1562	SDS0.005-40h	0.98611	-0.0201797	0.991191	-0.0127648	1.02601	0.0370394	1.04914	0.069202	36	0.737872	0.914319	0.0389021	0.219394	FALSE
SPNCRNA.1562	Sorb1.2M-40h	0.956854	-0.0636291	0.961785	-0.0562143	0.9717	-0.0414168	0.993606	-0.00925413	4	0.598513	0.697038	0.156744	0.144704	FALSE
SPNCRNA.1562	TSA500nM-40h	0.993325	-0.00966237	0.998443	-0.00224755	1.01048	0.0150373	1.03326	0.0471999	24	0.8501	0.903231	0.0442012	0.143673	FALSE
SPNCRNA.1562	Temp32C-40h	1.04201	0.0593727	1.04738	0.0667875	1.0065	0.00934559	1.02919	0.0415082	35	0.161059	0.470786	0.327176	0.133189	FALSE
SPNCRNA.1562	Temp37C-40h	1.04934	0.0694833	1.05475	0.0768982	0.989322	-0.0154882	1.01162	0.0166744	24	0.186942	0.242174	0.615872	0.1535	FALSE
SPNCRNA.1562	Torin5uM-40h	0.999239	-0.00109764	1.00439	0.00631718	1.01022	0.014668	1.03299	0.0468306	36	0.982014	0.984876	0.00661832	0.164956	FALSE
SPNCRNA.1562	VPA3mM-40h	1.00468	0.00673826	1.00986	0.0141531	1.00457	0.00657663	1.02722	0.0387393	48	0.8838	0.915938	0.0381337	0.175996	FALSE
SPNCRNA.1562	VPA5mM-40h	0.995768	-0.0061179	1.0009	0.00129692	1.00903	0.0129688	1.03178	0.0451315	35	0.910718	0.954405	0.0202671	0.190856	FALSE
SPNCRNA.159	Ant0.1ng-40h	0.968966	-0.0454828	1.01738	0.024854	1.00168	0.00242392	1.02054	0.0293353	24	0.042245	0.158684	0.799466	0.0522021	FALSE
SPNCRNA.159	Ant1ng-40h	0.940569	-0.0883938	0.987562	-0.018057	0.992344	-0.0110883	1.01103	0.015823	32	0.00178601	0.0254507	1.5943	0.0864567	FALSE
SPNCRNA.159	Bleo20ug-40h	0.954117	-0.0677619	1.00179	0.00257486	1.01048	0.0150402	1.02951	0.0419516	24	0.0816109	0.163222	0.787222	0.118468	FALSE
SPNCRNA.159	Caff10mM-40h	1.0392	0.0554718	1.09112	0.125808	1.07888	0.109532	1.09919	0.136443	24	0.0153008	0.072679	1.13859	0.0577471	FALSE
SPNCRNA.159	Can60ug-40h	0.959359	-0.0598568	1.00729	0.01048	0.985124	-0.0216235	1.00367	0.00528787	64	0.0211468	0.0547894	1.2613	0.112779	FALSE
SPNCRNA.159	CoCl0.25mM-40h	0.979507	-0.029873	1.02844	0.0404637	1.01872	0.0267634	1.03791	0.0536747	48	0.294494	0.569022	0.244871	0.115927	FALSE
SPNCRNA.159	Diam2mM-40h	0.960804	-0.0576862	1.00881	0.0126505	0.992939	-0.0102228	1.01163	0.0166885	24	0.0276264	0.073242	1.13524	0.0686007	FALSE
SPNCRNA.159	EGTA10mM-40h									0					FALSE
SPNCRNA.159	EMM_Arg-40h	0.932633	-0.100619	0.979229	-0.030282	1.05	0.0703906	1.06977	0.0973019	8	0.493222	0.756481	0.121202	0.275221	FALSE
SPNCRNA.159	EMM_Cyst-40h	0.999058	-0.00135998	1.04897	0.0689768	1.03708	0.052526	1.05661	0.0794373	8	0.966756	0.983833	0.00707878	0.0568854	FALSE
SPNCRNA.159	EMM_Gal2-40h	0.946533	-0.0792756	0.993823	-0.00893889	0.981089	-0.0275443	0.999561	-0.00063292	24	0.00161538	0.0107375	1.9691	0.0613694	FALSE
SPNCRNA.159	EMM_Glu-40h	0.984654	-0.0223108	1.03385	0.0480259	0.994795	-0.00752951	1.01353	0.0193818	48	0.350559	0.565473	0.247588	0.0873724	FALSE
SPNCRNA.159	EMM_Gluc2-40h	0.957871	-0.0620966	1.00573	0.00824018	0.989753	-0.0148598	1.00839	0.0120515	24	0.108045	0.293808	0.531937	0.11822	FALSE
SPNCRNA.159	EMM_Gluc3-40h	0.968556	-0.0460933	1.01695	0.0242434	1.00743	0.0106779	1.0264	0.0375893	31	0.1744	0.432209	0.364306	0.116479	FALSE
SPNCRNA.159	EMM_Gly3-40h	0.907154	-0.14058	0.952477	-0.0702433	0.942653	-0.0852006	0.960402	-0.0582893	8	0.00892449	0.0448185	1.34854	0.0779351	FALSE
SPNCRNA.159	EMM_NH4Cl-40h	1	0	1.04996	0.0703367	1	0	1.01883	0.0269113	167	1	1	0	0.151148	FALSE
SPNCRNA.159	EMM_Phe-40h	0.970864	-0.042659	1.01937	0.0276778	0.982219	-0.0258827	1.00071	0.00102862	24	0.231593	0.443839	0.352774	0.109092	FALSE
SPNCRNA.159	EMM_Pro-40h	1.00129	0.00186639	1.05132	0.0722031	1.03978	0.0562803	1.05936	0.0831916	24	0.943984	0.960841	0.0173484	0.0749413	FALSE
SPNCRNA.159	H2O2_0.5mM-40h	0.965745	-0.0502858	1.014	0.0200509	1.00801	0.0115097	1.02699	0.0384211	24	0.020856	0.108072	0.966286	0.0485381	FALSE
SPNCRNA.159	H2O2_1mM-40h	0.960091	-0.0587573	1.00806	0.0115794	0.986015	-0.0203182	1.00458	0.00659317	32	0.0131047	0.258113	0.588191	0.0666245	FALSE
SPNCRNA.159	H2O2_3mM-40h	1.01196	0.0171593	1.06252	0.087496	1.06322	0.0884359	1.08324	0.115347	24	0.584377	0.708712	0.14953	0.0958093	FALSE
SPNCRNA.159	HU10mM-40h	1.00054	0.000779753	1.05053	0.0711165	1.03685	0.0522107	1.05637	0.079122	72	0.975635	0.975635	0.0107124	0.122257	FALSE
SPNCRNA.159	HU20mM-40h	0.965427	-0.0507605	1.01366	0.0195762	0.994388	-0.00811928	1.01311	0.018792	64	0.142607	0.239076	0.621465	0.172838	FALSE
SPNCRNA.159	HU5mM-40h	0.980802	-0.0279663	1.0298	0.0423705	1.00916	0.0131508	1.02816	0.0400621	72	0.155677	0.328652	0.483263	0.0676108	FALSE
SPNCRNA.159	MMS0.005-40h	0.956408	-0.0643026	1.00419	0.0060341	1.00123	0.0017774	1.02008	0.0286887	72	0.00283485	0.0461675	1.33566	0.0818975	FALSE
SPNCRNA.159	MMS0.0075-40h	1.00816	0.0117308	1.05853	0.0820675	1.04273	0.0603641	1.06236	0.0872755	72	0.595976	0.754903	0.122109	0.0944095	FALSE
SPNCRNA.159	Rap100ng-40h	0.967888	-0.0470887	1.01624	0.023248	0.97887	-0.0308103	0.997301	-0.00389894	56	0.162663	0.476575	0.321869	0.156448	FALSE
SPNCRNA.159	SDS0.001-40h	0.930479	-0.103955	0.976967	-0.0336184	0.968349	-0.0464009	0.986582	-0.0194895	72	0.000187285	0.0017792	2.74977	0.127898	FALSE
SPNCRNA.159	SDS0.005-40h	0.991922	-0.0117015	1.04148	0.0586352	1.04593	0.0647834	1.06562	0.0916948	56	0.609376	0.807777	0.0927083	0.0878084	FALSE
SPNCRNA.159	Sorb1.2M-40h	0.958041	-0.0618407	1.00591	0.00849609	0.983834	-0.0235136	1.00236	0.00339769	23	0.0592987	0.156996	0.804112	0.0932799	FALSE
SPNCRNA.159	TSA500nM-40h									0					FALSE
SPNCRNA.159	Temp32C-40h	1.00877	0.0126039	1.05917	0.0829407	0.990144	-0.0142897	1.00879	0.0126216	48	0.651603	0.888068	0.0515538	0.115301	FALSE
SPNCRNA.159	Temp37C-40h	1.01435	0.0205549	1.06503	0.0908917	1.01841	0.0263125	1.03758	0.0532238	40	0.428227	0.498141	0.302647	0.0941786	FALSE
SPNCRNA.159	Torin5uM-40h	0.962503	-0.0551369	1.01059	0.0151999	0.960571	-0.0580353	0.978658	-0.0311239	41	0.130691	0.316995	0.498948	0.146584	FALSE
SPNCRNA.159	VPA3mM-40h	0.963433	-0.0537433	1.01157	0.0165934	0.994539	-0.00789963	1.01327	0.0190117	16	0.036006	0.120726	0.918199	0.0534322	FALSE
SPNCRNA.159	VPA5mM-40h	1.14393	0.194001	1.20108	0.264338	1.16533	0.220735	1.18727	0.247646	24	2.54041e-12	2.89607e-10	9.53819	0.065025	TRUE
SPNCRNA.1624	Ant0.1ng-40h	0.972771	-0.0398275	1.01507	0.0215775	0.993808	-0.00896155	1.02483	0.035385	24	0.09903	0.262599	0.580707	0.0537006	FALSE
SPNCRNA.1624	Ant1ng-40h	0.980038	-0.02909	1.02265	0.0323151	0.985443	-0.0211552	1.0162	0.0231913	36	0.19929	0.382743	0.417093	0.0569295	FALSE
SPNCRNA.1624	Bleo20ug-40h	0.959995	-0.0589012	1.00174	0.00250379	0.977058	-0.0334842	1.00756	0.0108623	24	0.0379056	0.0982099	1.00784	0.0722231	FALSE
SPNCRNA.1624	Caff10mM-40h	0.990607	-0.0136147	1.03368	0.0477903	0.962787	-0.0547122	0.992841	-0.0103656	36	0.740791	0.86666	0.0621515	0.15849	FALSE
SPNCRNA.1624	Can60ug-40h	1.02643	0.0376329	1.07106	0.0990379	1.06255	0.0875356	1.09572	0.131882	24	0.176704	0.283723	0.547106	0.0753159	FALSE
SPNCRNA.1624	CoCl0.25mM-40h	0.979894	-0.0293022	1.0225	0.0321028	0.97426	-0.0376205	1.00467	0.00672599	12	0.371262	0.671807	0.172756	0.0656158	FALSE
SPNCRNA.1624	Diam2mM-40h	0.95423	-0.0675913	0.995721	-0.00618625	0.966139	-0.0496976	0.996298	-0.00535112	12	0.0793523	0.161539	0.791724	0.0771045	FALSE
SPNCRNA.1624	EGTA10mM-40h	0.902306	-0.148312	0.941539	-0.0869068	0.926911	-0.109498	0.955845	-0.0651514	12	0.044205	0.0988795	1.00489	0.151972	FALSE
SPNCRNA.1624	EMM_Arg-40h									0					FALSE
SPNCRNA.1624	EMM_Cyst-40h	0.991502	-0.0123124	1.03461	0.0490926	1.01062	0.0152422	1.04217	0.0595887	12	0.714661	0.880727	0.0551587	0.0694828	FALSE
SPNCRNA.1624	EMM_Gal2-40h	0.945488	-0.0808697	0.986599	-0.0194647	0.983994	-0.0232778	1.01471	0.0210687	24	0.0438296	0.126593	0.897589	0.117316	FALSE
SPNCRNA.1624	EMM_Glu-40h	1.00074	0.00106703	1.04425	0.0624721	0.997352	-0.00382557	1.02849	0.0405209	36	0.969557	0.969557	0.0134265	0.0921852	FALSE
SPNCRNA.1624	EMM_Gluc2-40h	1.00241	0.00347675	1.046	0.0648818	1.02228	0.0317949	1.05419	0.0761415	8	0.92578	0.993136	0.00299143	0.0651088	FALSE
SPNCRNA.1624	EMM_Gluc3-40h	1.02259	0.0322223	1.06705	0.0936273	1.02363	0.0337002	1.05559	0.0780467	16	0.375576	0.687539	0.162703	0.0905752	FALSE
SPNCRNA.1624	EMM_Gly3-40h	0.948464	-0.0763348	0.989705	-0.0149298	0.960442	-0.0582301	0.990423	-0.0138835	12	0.0345204	0.109314	0.961322	0.0691777	FALSE
SPNCRNA.1624	EMM_NH4Cl-40h	1	0	1.04348	0.061405	1	0	1.03122	0.0443465	128	1	1	0	0.147928	FALSE
SPNCRNA.1624	EMM_Phe-40h	0.986392	-0.0197663	1.02928	0.0416387	0.98709	-0.0187466	1.0179	0.0255999	28	0.427484	0.631482	0.199639	0.0640684	FALSE
SPNCRNA.1624	EMM_Pro-40h	0.962745	-0.0547743	1.00461	0.00663075	0.943286	-0.0842336	0.972731	-0.0398871	16	0.416268	0.527273	0.277965	0.179321	FALSE
SPNCRNA.1624	H2O2_0.5mM-40h	0.992315	-0.0111301	1.03546	0.0502749	0.991941	-0.0116745	1.0229	0.032672	28	0.678707	0.805965	0.0936841	0.0750387	FALSE
SPNCRNA.1624	H2O2_1mM-40h	0.98977	-0.0148346	1.03281	0.0465704	1.01186	0.0170167	1.04345	0.0613632	24	0.593141	0.836813	0.0773714	0.073363	FALSE
SPNCRNA.1624	H2O2_3mM-40h	1.02032	0.0290164	1.06468	0.0904215	1.00625	0.00899465	1.03767	0.0533412	16	0.607444	0.713017	0.1469	0.153622	FALSE
SPNCRNA.1624	HU10mM-40h	1.03304	0.0468899	1.07795	0.108295	1.05186	0.0729473	1.0847	0.117294	36	0.185865	0.290254	0.537221	0.133212	FALSE
SPNCRNA.1624	HU20mM-40h	0.998437	-0.00225598	1.04185	0.059149	1.01628	0.0232973	1.048	0.0676438	31	0.951265	0.971152	0.0127126	0.128632	FALSE
SPNCRNA.1624	HU5mM-40h	0.983175	-0.0244795	1.02593	0.0369256	0.999691	-0.000446565	1.0309	0.0439	36	0.252512	0.405441	0.392072	0.0475256	FALSE
SPNCRNA.1624	MMS0.005-40h	1.00151	0.00217596	1.04506	0.063581	1.0152	0.0217623	1.04689	0.0661088	36	0.93481	0.951503	0.0215899	0.0844239	FALSE
SPNCRNA.1624	MMS0.0075-40h	0.945339	-0.0810969	0.986443	-0.0196919	0.979442	-0.0299687	1.01002	0.0143779	36	0.00759168	0.0576967	1.23885	0.0974915	FALSE
SPNCRNA.1624	Rap100ng-40h	0.97684	-0.0338052	1.01931	0.0275998	0.959445	-0.0597284	0.989395	-0.0153819	20	0.442377	0.700833	0.154386	0.125759	FALSE
SPNCRNA.1624	SDS0.001-40h	1.00759	0.0109152	1.05141	0.0723202	1.02834	0.0403177	1.06044	0.0846642	36	0.667981	0.698622	0.155757	0.0779035	FALSE
SPNCRNA.1624	SDS0.005-40h	1.00346	0.00498825	1.0471	0.0663933	1.04531	0.0639247	1.07794	0.108271	36	0.866681	0.968644	0.0138359	0.102105	FALSE
SPNCRNA.1624	Sorb1.2M-40h	0.979102	-0.0304686	1.02168	0.0309364	1.02102	0.0300152	1.0529	0.0743617	4	0.756356	0.80387	0.0948141	0.126576	FALSE
SPNCRNA.1624	TSA500nM-40h	0.916718	-0.125451	0.956578	-0.0640456	0.919345	-0.121321	0.948044	-0.0769747	24	2.84093e-06	5.53587e-05	4.25681	0.0564128	TRUE
SPNCRNA.1624	Temp32C-40h	1.00561	0.00806873	1.04933	0.0694737	1.0185	0.0264432	1.05029	0.0707897	36	0.778912	0.898027	0.0467107	0.0969118	FALSE
SPNCRNA.1624	Temp37C-40h	1.02016	0.0287998	1.06452	0.0902048	1.00385	0.00553821	1.03518	0.0498847	24	0.333788	0.404807	0.392752	0.0840711	FALSE
SPNCRNA.1624	Torin5uM-40h	0.984186	-0.0229968	1.02698	0.0384082	0.990633	-0.0135776	1.02156	0.0307689	36	0.433438	0.658826	0.181229	0.0983305	FALSE
SPNCRNA.1624	VPA3mM-40h	0.986476	-0.0196446	1.02937	0.0417604	0.989181	-0.0156932	1.02006	0.0286533	48	0.382972	0.538998	0.268413	0.0654866	FALSE
SPNCRNA.1624	VPA5mM-40h	0.981443	-0.0270235	1.02412	0.0343815	0.9857	-0.0207788	1.01647	0.0235677	36	0.440379	0.539819	0.267752	0.127434	FALSE
SPNCRNA.1642	Ant0.1ng-40h	0.91978	-0.12064	0.962762	-0.0547483	0.941881	-0.0863837	0.987712	-0.0178379	36	0.0109515	0.0780296	1.10774	0.15561	FALSE
SPNCRNA.1642	Ant1ng-40h	0.950896	-0.0726409	0.995333	-0.00674944	1.01961	0.0280171	1.06922	0.0965628	36	0.340249	0.510373	0.292112	0.298833	FALSE
SPNCRNA.1642	Bleo20ug-40h	1.02345	0.0334375	1.07128	0.099329	1.06515	0.091053	1.11698	0.159599	14	0.544683	0.627211	0.202587	0.131041	FALSE
SPNCRNA.1642	Caff10mM-40h	0.91378	-0.130082	0.956482	-0.06419	0.965634	-0.0504518	1.01262	0.0180939	36	0.0215947	0.0849335	1.07092	0.198964	FALSE
SPNCRNA.1642	Can60ug-40h	1.16723	0.223095	1.22178	0.288986	1.15267	0.204985	1.20876	0.273531	24	1.8061e-10	2.05896e-08	7.68635	0.0760107	TRUE
SPNCRNA.1642	CoCl0.25mM-40h	0.999181	-0.00118211	1.04587	0.0647094	1.065	0.0908483	1.11682	0.159394	12	0.986821	0.986821	0.00576174	0.16397	FALSE
SPNCRNA.1642	Diam2mM-40h	1.05825	0.0816766	1.1077	0.147568	1.01596	0.022839	1.06539	0.0913848	12	0.053224	0.118971	0.924557	0.0813528	FALSE
SPNCRNA.1642	EGTA10mM-40h	0.794463	-0.331949	0.831589	-0.266057	1.02052	0.0293088	1.07018	0.0978545	9	0.145081	0.232677	0.633246	0.397397	FALSE
SPNCRNA.1642	EMM_Arg-40h	1.02853	0.0405883	1.0766	0.10648	1.04299	0.0607258	1.09374	0.129272	20	0.318862	0.644427	0.190826	0.101629	FALSE
SPNCRNA.1642	EMM_Cyst-40h	1.3708	0.455019	1.43486	0.52091	1.29096	0.368445	1.35378	0.43699	12	0.00206712	0.0130918	1.883	0.336294	FALSE
SPNCRNA.1642	EMM_Gal2-40h	1.07263	0.101157	1.12276	0.167049	1.06728	0.0939431	1.11922	0.162489	24	0.0188491	0.0760697	1.11879	0.122173	FALSE
SPNCRNA.1642	EMM_Glu-40h	1.05663	0.079464	1.106	0.145356	1.04248	0.0600159	1.0932	0.128562	36	0.113373	0.403893	0.393734	0.189615	FALSE
SPNCRNA.1642	EMM_Gluc2-40h	0.971607	-0.0415545	1.01701	0.0243369	1.016	0.0228969	1.06544	0.0914426	12	0.590312	0.81079	0.0910918	0.174876	FALSE
SPNCRNA.1642	EMM_Gluc3-40h	0.910569	-0.13516	0.953121	-0.0692681	0.924349	-0.113491	0.969326	-0.0449454	12	0.0260293	0.185459	0.731752	0.11692	FALSE
SPNCRNA.1642	EMM_Gly3-40h	1.07151	0.0996494	1.12159	0.165541	1.08623	0.119332	1.13909	0.187878	20	0.0973231	0.20546	0.687273	0.175715	FALSE
SPNCRNA.1642	EMM_NH4Cl-40h	1	0	1.04673	0.0658915	1	0	1.04866	0.0685458	111	1	1	0	0.200956	FALSE
SPNCRNA.1642	EMM_Phe-40h	1.02229	0.0318056	1.07006	0.0976971	1.0147	0.0210562	1.06408	0.0896019	24	0.439829	0.631482	0.199639	0.113444	FALSE
SPNCRNA.1642	EMM_Pro-40h	1.20173	0.265116	1.25789	0.331007	1.13256	0.179591	1.18767	0.248136	36	1.11393e-05	4.0964e-05	4.3876	0.234514	TRUE
SPNCRNA.1642	H2O2_0.5mM-40h	1.04586	0.0646925	1.09474	0.130584	1.03595	0.0509537	1.08636	0.1195	35	0.131918	0.284383	0.546096	0.148487	FALSE
SPNCRNA.1642	H2O2_1mM-40h	1.03345	0.0474625	1.08174	0.113354	1.01939	0.0277012	1.06899	0.0962469	24	0.306027	0.713201	0.146788	0.136886	FALSE
SPNCRNA.1642	H2O2_3mM-40h	1.01431	0.020503	1.06171	0.0863945	0.958104	-0.0617463	1.00472	0.0067995	24	0.677567	0.764779	0.116464	0.148361	FALSE
SPNCRNA.1642	HU10mM-40h	0.968159	-0.0466841	1.0134	0.0192074	0.99116	-0.0128096	1.03939	0.0557362	24	0.514263	0.672156	0.17253	0.229162	FALSE
SPNCRNA.1642	HU20mM-40h	1.11767	0.160494	1.1699	0.226385	1.13928	0.18812	1.19471	0.256666	20	0.000545952	0.00366109	2.43639	0.11968	TRUE
SPNCRNA.1642	HU5mM-40h	1.00354	0.00510232	1.05044	0.0709938	1.00217	0.0031332	1.05094	0.071679	36	0.911022	0.930501	0.0312832	0.162093	FALSE
SPNCRNA.1642	MMS0.005-40h	1.02806	0.0399235	1.0761	0.105815	1.01769	0.0252985	1.06721	0.0938442	32	0.232597	0.477985	0.320585	0.0868064	FALSE
SPNCRNA.1642	MMS0.0075-40h	1.13468	0.182289	1.18771	0.24818	1.13359	0.180895	1.18875	0.24944	24	0.000132413	0.00251585	2.59931	0.137105	TRUE
SPNCRNA.1642	Rap100ng-40h	0.938525	-0.0915336	0.982383	-0.0256421	0.917377	-0.124414	0.962015	-0.0558681	36	0.0580806	0.317214	0.498647	0.164594	FALSE
SPNCRNA.1642	SDS0.001-40h	1.1087	0.148865	1.16051	0.214757	1.06539	0.0913759	1.11723	0.159922	20	0.00113522	0.00539231	2.26823	0.118042	TRUE
SPNCRNA.1642	SDS0.005-40h	0.770108	-0.376867	0.806097	-0.310975	0.925018	-0.112447	0.970028	-0.0439011	19	0.00716333	0.04298	1.36673	0.340655	FALSE
SPNCRNA.1642	Sorb1.2M-40h	0.977967	-0.0321418	1.02367	0.0337497	0.999881	-0.000171736	1.04853	0.068374	12	0.504223	0.61838	0.208745	0.0974531	FALSE
SPNCRNA.1642	TSA500nM-40h	1.01479	0.0211806	1.06221	0.0870721	1.05931	0.0831297	1.11086	0.151676	24	0.680601	0.787249	0.103888	0.15726	FALSE
SPNCRNA.1642	Temp32C-40h	0.982502	-0.0254679	1.02842	0.0404236	0.955414	-0.0658016	1.0019	0.0027442	28	0.603364	0.881839	0.0546105	0.155524	FALSE
SPNCRNA.1642	Temp37C-40h	1.10338	0.141935	1.15495	0.207826	1.07607	0.105777	1.12843	0.174323	36	0.00420104	0.0134388	1.87164	0.186285	FALSE
SPNCRNA.1642	Torin5uM-40h	0.884864	-0.176473	0.926215	-0.110581	0.969936	-0.0440384	1.01713	0.0245074	24	0.0367005	0.14268	0.845638	0.253129	FALSE
SPNCRNA.1642	VPA3mM-40h	0.921219	-0.118383	0.964269	-0.0524917	1.01211	0.0173651	1.06136	0.0859109	32	0.0782142	0.202646	0.693262	0.235254	FALSE
SPNCRNA.1642	VPA5mM-40h	1.09982	0.137267	1.15122	0.203158	1.09254	0.127683	1.1457	0.196229	12	0.00160704	0.00458005	2.33913	0.0805381	TRUE
SPNCRNA.1670	Ant0.1ng-40h	0.986649	-0.0193917	1.01376	0.0197155	0.970316	-0.0434739	1.02051	0.0292946	24	0.592127	0.79267	0.100908	0.097669	FALSE
SPNCRNA.1670	Ant1ng-40h	0.947504	-0.0777966	0.973539	-0.0386894	0.937776	-0.0926843	0.98629	-0.0199158	36	0.0229092	0.0842469	1.07445	0.102907	FALSE
SPNCRNA.1670	Bleo20ug-40h	0.954957	-0.0664921	0.981197	-0.0273849	0.943482	-0.0839332	0.992291	-0.0111647	21	0.160456	0.268005	0.571858	0.128782	FALSE
SPNCRNA.1670	Caff10mM-40h	1.00219	0.00316121	1.02973	0.0422684	0.949062	-0.0754251	0.99816	-0.00265655	36	0.941453	0.975688	0.010689	0.156863	FALSE
SPNCRNA.1670	Can60ug-40h	1.05351	0.075209	1.08246	0.114316	1.03304	0.0469007	1.08649	0.119669	23	0.117162	0.203605	0.691212	0.145542	FALSE
SPNCRNA.1670	CoCl0.25mM-40h	1.0319	0.0453063	1.06026	0.0844135	1.02331	0.0332378	1.07624	0.106006	12	0.511235	0.794915	0.0996794	0.159182	FALSE
SPNCRNA.1670	Diam2mM-40h	0.966519	-0.0491299	0.993077	-0.0100227	0.93081	-0.103442	0.978963	-0.0306732	12	0.237926	0.356889	0.447467	0.0815954	FALSE
SPNCRNA.1670	EGTA10mM-40h	0.816046	-0.293277	0.83847	-0.25417	0.854289	-0.227204	0.898484	-0.154435	12	0.000293894	0.002271	2.64378	0.129328	TRUE
SPNCRNA.1670	EMM_Arg-40h									0					FALSE
SPNCRNA.1670	EMM_Cyst-40h	1.01306	0.0187198	1.0409	0.057827	1.01107	0.0158772	1.06337	0.0886457	12	0.71198	0.880727	0.0551587	0.110991	FALSE
SPNCRNA.1670	EMM_Gal2-40h	0.950971	-0.0725262	0.977102	-0.0334189	0.965906	-0.050045	1.01588	0.0227235	23	0.0567842	0.142591	0.845907	0.0980871	FALSE
SPNCRNA.1670	EMM_Glu-40h	1.02787	0.0396617	1.05612	0.0787689	0.989481	-0.0152558	1.04067	0.0575127	36	0.232422	0.519531	0.284389	0.106844	FALSE
SPNCRNA.1670	EMM_Gluc2-40h	1.07594	0.105592	1.1055	0.144699	1.06523	0.0911703	1.12034	0.163939	8	0.180062	0.401019	0.396835	0.144144	FALSE
SPNCRNA.1670	EMM_Gluc3-40h	0.907523	-0.139994	0.93246	-0.100887	0.945904	-0.080235	0.994838	-0.00746643	16	0.0581531	0.245535	0.609886	0.177574	FALSE
SPNCRNA.1670	EMM_Gly3-40h	0.929512	-0.105455	0.955053	-0.0663476	0.926409	-0.110279	0.974335	-0.0375108	12	0.0205043	0.070833	1.14976	0.0841744	FALSE
SPNCRNA.1670	EMM_NH4Cl-40h	1	0	1.02748	0.0391072	1	0	1.05173	0.0727685	128	1	1	0	0.179172	FALSE
SPNCRNA.1670	EMM_Phe-40h	0.962277	-0.0554752	0.988719	-0.016368	0.974569	-0.0371641	1.02499	0.0356044	28	0.240768	0.449959	0.346827	0.150827	FALSE
SPNCRNA.1670	EMM_Pro-40h	0.984459	-0.0225974	1.01151	0.0165098	0.932042	-0.101534	0.980259	-0.0287653	16	0.783044	0.850162	0.0704984	0.219485	FALSE
SPNCRNA.1670	H2O2_0.5mM-40h	0.994043	-0.00862009	1.02136	0.0304871	0.955703	-0.065366	1.00514	0.00740253	28	0.794442	0.854111	0.0684854	0.0912544	FALSE
SPNCRNA.1670	H2O2_1mM-40h	0.990712	-0.013463	1.01793	0.0256442	0.955799	-0.0652203	1.00525	0.00754819	24	0.699572	0.866861	0.0620506	0.0923201	FALSE
SPNCRNA.1670	H2O2_3mM-40h	0.965029	-0.0513559	0.991546	-0.0122487	0.884063	-0.177779	0.929798	-0.105011	16	0.314996	0.472494	0.325603	0.124837	FALSE
SPNCRNA.1670	HU10mM-40h	1.06024	0.0843908	1.08937	0.123498	1.04685	0.06605	1.101	0.138818	36	0.02238	0.0510362	1.29212	0.127932	FALSE
SPNCRNA.1670	HU20mM-40h	0.993703	-0.00911364	1.02101	0.0299936	0.97788	-0.0322711	1.02847	0.0404974	32	0.824728	0.911677	0.0401589	0.13802	FALSE
SPNCRNA.1670	HU5mM-40h	1.01393	0.0199647	1.0418	0.059072	0.978327	-0.0316115	1.02894	0.041157	36	0.505198	0.636051	0.196508	0.086566	FALSE
SPNCRNA.1670	MMS0.005-40h	1.02607	0.0371356	1.05427	0.0762428	1.00645	0.00927742	1.05852	0.0820459	36	0.219683	0.477985	0.320585	0.0891167	FALSE
SPNCRNA.1670	MMS0.0075-40h	0.987528	-0.018106	1.01466	0.0210012	0.980903	-0.0278176	1.03165	0.0449509	36	0.554639	0.743869	0.128504	0.0883752	FALSE
SPNCRNA.1670	Rap100ng-40h	0.904099	-0.145448	0.928942	-0.10634	0.956098	-0.0647696	1.00556	0.00799889	20	0.153855	0.476575	0.321869	0.289486	FALSE
SPNCRNA.1670	SDS0.001-40h	0.980813	-0.0279498	1.00776	0.0111574	0.967932	-0.0470221	1.01801	0.0257465	36	0.347636	0.421601	0.375099	0.0819568	FALSE
SPNCRNA.1670	SDS0.005-40h	1.03057	0.0434407	1.05889	0.082548	1.02204	0.0314528	1.07491	0.104221	36	0.162262	0.402127	0.395637	0.0944105	FALSE
SPNCRNA.1670	Sorb1.2M-40h	0.794586	-0.331724	0.81642	-0.292617	0.873054	-0.195856	0.91822	-0.123088	4	0.328318	0.499043	0.301862	0.362049	FALSE
SPNCRNA.1670	TSA500nM-40h	0.975452	-0.0358566	1.00226	0.00325063	0.939468	-0.0900836	0.98807	-0.0173151	24	0.324845	0.470896	0.327075	0.097274	FALSE
SPNCRNA.1670	Temp32C-40h	1.01915	0.0273609	1.04715	0.0664681	1.01579	0.0226045	1.06834	0.095373	36	0.410991	0.755693	0.121655	0.106783	FALSE
SPNCRNA.1670	Temp37C-40h	1.04645	0.0654991	1.0752	0.104606	0.964761	-0.0517564	1.01467	0.0210121	24	0.110232	0.15361	0.81358	0.120678	FALSE
SPNCRNA.1670	Torin5uM-40h	0.990273	-0.0141015	1.01748	0.0250057	0.964328	-0.0524048	1.01422	0.0203638	36	0.691188	0.862527	0.0642272	0.116641	FALSE
SPNCRNA.1670	VPA3mM-40h	0.938876	-0.0909936	0.964674	-0.0518864	0.903046	-0.147129	0.949763	-0.0743603	48	0.0057067	0.0260225	1.58465	0.109404	FALSE
SPNCRNA.1670	VPA5mM-40h	1.02756	0.0392274	1.0558	0.0783346	1.0216	0.0308363	1.07445	0.103605	36	0.286601	0.367175	0.435126	0.126709	FALSE
SPNCRNA.1696	Ant0.1ng-40h	0.964731	-0.0518007	0.993769	-0.00901719	0.982177	-0.0259451	0.992206	-0.0112879	36	0.0061468	0.0539027	1.26839	0.0493078	FALSE
SPNCRNA.1696	Ant1ng-40h	0.944355	-0.0825994	0.972779	-0.0398159	0.969767	-0.0442895	0.97967	-0.0296323	52	8.26228e-05	0.00398829	2.39921	0.0714472	FALSE
SPNCRNA.1696	Bleo20ug-40h	0.937011	-0.0938619	0.965215	-0.0510784	0.967998	-0.0469237	0.977883	-0.0322665	36	0.000687402	0.00602799	2.21983	0.0910691	FALSE
SPNCRNA.1696	Caff10mM-40h	0.991789	-0.0118952	1.02164	0.0308883	1.0533	0.074918	1.06406	0.0895753	48	0.741923	0.86666	0.0621515	0.162555	FALSE
SPNCRNA.1696	Can60ug-40h	0.993187	-0.00986287	1.02308	0.0329206	0.996615	-0.00489113	1.00679	0.00976608	56	0.654381	0.753529	0.1229	0.088872	FALSE
SPNCRNA.1696	CoCl0.25mM-40h	1.02085	0.029772	1.05158	0.0725555	1.03063	0.043523	1.04115	0.0581802	36	0.200203	0.474046	0.32418	0.0789313	FALSE
SPNCRNA.1696	Diam2mM-40h	0.920963	-0.118784	0.948684	-0.0760009	0.932261	-0.101194	0.941781	-0.086537	24	5.38378e-06	0.00012275	3.91098	0.0622419	TRUE
SPNCRNA.1696	EGTA10mM-40h	0.870781	-0.199618	0.896991	-0.156835	0.968009	-0.0469075	0.977894	-0.0322503	12	0.0346153	0.0817306	1.08762	0.189827	FALSE
SPNCRNA.1696	EMM_Arg-40h	1.03559	0.0504564	1.06676	0.0932399	1.03253	0.0461844	1.04307	0.0608416	4	0.332389	0.644427	0.190826	0.0625148	FALSE
SPNCRNA.1696	EMM_Cyst-40h	1.04719	0.0665294	1.07871	0.109313	1.04738	0.0667782	1.05807	0.0814354	16	0.0518369	0.193465	0.713397	0.0854936	FALSE
SPNCRNA.1696	EMM_Gal2-40h	0.981081	-0.0275563	1.01061	0.0152272	0.99471	-0.00765187	1.00487	0.00700535	36	0.189768	0.351537	0.454029	0.0642077	FALSE
SPNCRNA.1696	EMM_Glu-40h	1.01399	0.0200481	1.04451	0.0628316	1.00283	0.00407113	1.01307	0.0187283	60	0.345057	0.565473	0.247588	0.0876362	FALSE
SPNCRNA.1696	EMM_Gluc2-40h	1.00593	0.00853469	1.03621	0.0513182	0.987391	-0.0183059	0.997474	-0.00364868	20	0.835913	0.973154	0.0118186	0.122374	FALSE
SPNCRNA.1696	EMM_Gluc3-40h	1.00178	0.00256602	1.03193	0.0453495	1.00743	0.0106826	1.01772	0.0253398	32	0.939192	0.95895	0.0182039	0.122359	FALSE
SPNCRNA.1696	EMM_Gly3-40h	0.952105	-0.0708076	0.980763	-0.0280241	0.986578	-0.0194948	0.996652	-0.00483756	16	0.0155363	0.0568351	1.24538	0.0650145	FALSE
SPNCRNA.1696	EMM_NH4Cl-40h	1	0	1.0301	0.0427835	1	0	1.01021	0.0146572	212	1	1	0	0.148272	FALSE
SPNCRNA.1696	EMM_Phe-40h	0.961797	-0.056195	0.990747	-0.0134115	0.986938	-0.0189684	0.997016	-0.00431116	40	0.0441179	0.152407	0.816994	0.103041	FALSE
SPNCRNA.1696	EMM_Pro-40h	0.995995	-0.00578901	1.02597	0.0369945	1.02484	0.0353924	1.0353	0.0500496	27	0.876144	0.916334	0.037946	0.125879	FALSE
SPNCRNA.1696	H2O2_0.5mM-40h	0.995322	-0.00676469	1.02528	0.0360188	1.0082	0.0117792	1.01849	0.0264364	39	0.751332	0.839556	0.0759504	0.0702145	FALSE
SPNCRNA.1696	H2O2_1mM-40h	0.998587	-0.00203938	1.02864	0.0407441	1.01051	0.0150843	1.02083	0.0297415	39	0.919779	0.960774	0.0173788	0.063757	FALSE
SPNCRNA.1696	H2O2_3mM-40h	1.00011	0.000165771	1.03022	0.0429493	1.01794	0.0256544	1.02834	0.0403116	27	0.996034	0.996034	0.00172577	0.110983	FALSE
SPNCRNA.1696	HU10mM-40h	1.02217	0.0316371	1.05294	0.0744206	1.02432	0.0346624	1.03478	0.0493196	72	0.208753	0.313129	0.504277	0.126833	FALSE
SPNCRNA.1696	HU20mM-40h	1.05489	0.0770945	1.08664	0.119878	1.05013	0.0705733	1.06086	0.0852305	64	0.01898	0.0460365	1.3369	0.17106	FALSE
SPNCRNA.1696	HU5mM-40h	0.990872	-0.0132298	1.0207	0.0295537	1.00547	0.00787625	1.01574	0.0225335	72	0.434462	0.600215	0.221693	0.0540827	FALSE
SPNCRNA.1696	MMS0.005-40h	0.985741	-0.0207188	1.01541	0.0220647	1.00227	0.0032667	1.0125	0.0179239	72	0.299992	0.551598	0.258377	0.0832152	FALSE
SPNCRNA.1696	MMS0.0075-40h	1.01001	0.0143714	1.04041	0.0571549	1.02894	0.0411566	1.03945	0.0558139	72	0.503455	0.726504	0.138762	0.09784	FALSE
SPNCRNA.1696	Rap100ng-40h	0.991295	-0.0126137	1.02113	0.0301698	1.01321	0.0189326	1.02356	0.0335898	48	0.656824	0.824854	0.0836228	0.120137	FALSE
SPNCRNA.1696	SDS0.001-40h	0.997957	-0.00295066	1.02799	0.0398328	0.989238	-0.0156098	0.99934	-0.000952553	72	0.898998	0.906954	0.0424148	0.110762	FALSE
SPNCRNA.1696	SDS0.005-40h	1.04171	0.0589537	1.07306	0.101737	1.04322	0.0610367	1.05387	0.0756939	64	0.0114529	0.0621729	1.2064	0.106625	FALSE
SPNCRNA.1696	Sorb1.2M-40h	0.94375	-0.0835233	0.972156	-0.0407398	0.959547	-0.0595744	0.969345	-0.0449172	16	0.0385748	0.118852	0.924994	0.0967	FALSE
SPNCRNA.1696	TSA500nM-40h	0.985848	-0.0205634	1.01552	0.0222201	1.00217	0.00312611	1.0124	0.0177833	24	0.439297	0.602263	0.220214	0.0767497	FALSE
SPNCRNA.1696	Temp32C-40h	1.00889	0.0127755	1.03926	0.055559	1.04095	0.0578979	1.05158	0.0725551	60	0.588485	0.878188	0.0564124	0.104414	FALSE
SPNCRNA.1696	Temp37C-40h	1.06986	0.0974196	1.10206	0.140203	1.03866	0.0547243	1.04927	0.0693815	44	0.00080793	0.00512288	2.29049	0.118738	FALSE
SPNCRNA.1696	Torin5uM-40h	0.957016	-0.0633845	0.985822	-0.020601	0.997735	-0.00327211	1.00792	0.0113851	60	0.00768459	0.0584029	1.23357	0.099304	FALSE
SPNCRNA.1696	VPA3mM-40h	0.995399	-0.00665255	1.02536	0.0361309	0.998414	-0.00228933	1.00861	0.0123679	56	0.770732	0.853043	0.0690288	0.0945663	FALSE
SPNCRNA.1696	VPA5mM-40h	1.04431	0.0625439	1.07574	0.105327	1.09771	0.134499	1.10892	0.149156	47	0.0728405	0.115331	0.938055	0.156774	FALSE
SPNCRNA.175	Ant0.1ng-40h	0.943412	-0.0840408	1.02556	0.036408	0.938715	-0.0912402	1.032	0.0454477	36	0.00234926	0.039627	1.40201	0.0771515	FALSE
SPNCRNA.175	Ant1ng-40h	1.07243	0.100885	1.16581	0.221334	1.06206	0.0868629	1.1676	0.223551	36	0.0003409	0.00971564	2.01253	0.0901543	TRUE
SPNCRNA.175	Bleo20ug-40h	0.994487	-0.00797516	1.08108	0.112474	1.03121	0.044343	1.13369	0.181031	16	0.904399	0.912403	0.0398134	0.187361	FALSE
SPNCRNA.175	Caff10mM-40h	0.992776	-0.0104592	1.07922	0.10999	1.04267	0.0602826	1.14629	0.196971	36	0.785682	0.86959	0.0606854	0.146929	FALSE
SPNCRNA.175	Can60ug-40h	1.04448	0.062788	1.13543	0.183237	1.02212	0.0315586	1.12369	0.168247	24	0.149652	0.247251	0.606861	0.143002	FALSE
SPNCRNA.175	CoCl0.25mM-40h	0.953964	-0.0679929	1.03703	0.0524559	0.956096	-0.0647722	1.05111	0.0719157	12	0.0943441	0.346943	0.459742	0.0840001	FALSE
SPNCRNA.175	Diam2mM-40h	0.97405	-0.0379326	1.05886	0.0825163	0.970041	-0.0438824	1.06644	0.0928056	12	0.298382	0.414824	0.382136	0.0756088	FALSE
SPNCRNA.175	EGTA10mM-40h	1.03738	0.0529473	1.12771	0.173396	1.03567	0.0505583	1.13859	0.187246	12	0.482943	0.641067	0.193096	0.187674	FALSE
SPNCRNA.175	EMM_Arg-40h	1.15243	0.204681	1.25278	0.32513	1.0698	0.0973394	1.17611	0.234027	23	0.00631232	0.0239868	1.62003	0.257124	FALSE
SPNCRNA.175	EMM_Cyst-40h	0.992139	-0.0113863	1.07853	0.109063	1.02392	0.0341077	1.12568	0.170796	12	0.82873	0.931481	0.0308258	0.123956	FALSE
SPNCRNA.175	EMM_Gal2-40h	0.880092	-0.184274	0.956724	-0.0638251	0.914857	-0.128382	1.00577	0.00830561	24	0.000714346	0.00620931	2.20696	0.155053	TRUE
SPNCRNA.175	EMM_Glu-40h	1.01145	0.0164186	1.09952	0.136867	1.00455	0.00655047	1.10438	0.143238	36	0.614391	0.796105	0.0990294	0.116639	FALSE
SPNCRNA.175	EMM_Gluc2-40h	0.859085	-0.219128	0.933888	-0.0986791	0.841581	-0.248826	0.925216	-0.112138	12	1.05873e-05	0.00120695	2.91831	0.0783869	TRUE
SPNCRNA.175	EMM_Gluc3-40h	0.776902	-0.364196	0.844549	-0.243747	0.943899	-0.0832957	1.0377	0.0533922	12	0.102776	0.334755	0.475272	0.470271	FALSE
SPNCRNA.175	EMM_Gly3-40h	0.973791	-0.0383158	1.05858	0.082133	0.913859	-0.129956	1.00468	0.00673148	15	0.660727	0.731422	0.135832	0.239651	FALSE
SPNCRNA.175	EMM_NH4Cl-40h	1	0	1.08707	0.120449	1	0	1.09938	0.136688	121	1	1	0	0.165833	FALSE
SPNCRNA.175	EMM_Phe-40h	1.00515	0.0074134	1.09267	0.127862	1.01827	0.026123	1.11947	0.162811	24	0.830796	0.919522	0.0364378	0.104203	FALSE
SPNCRNA.175	EMM_Pro-40h	1.157	0.210385	1.25774	0.330834	1.10964	0.150094	1.21992	0.286782	36	5.34931e-05	0.000145196	3.83805	0.212601	TRUE
SPNCRNA.175	H2O2_0.5mM-40h	1.00684	0.00983067	1.09451	0.13028	1.00431	0.00621106	1.10412	0.142899	36	0.765911	0.839556	0.0759504	0.11875	FALSE
SPNCRNA.175	H2O2_1mM-40h	0.991751	-0.0119503	1.07811	0.108499	1.00635	0.00912781	1.10636	0.145816	24	0.854224	0.927443	0.0327128	0.225111	FALSE
SPNCRNA.175	H2O2_3mM-40h	1.03366	0.047767	1.12367	0.168216	1.0263	0.0374505	1.12829	0.174138	24	0.377531	0.534292	0.272221	0.186094	FALSE
SPNCRNA.175	HU10mM-40h	1.09957	0.136937	1.19531	0.257386	1.10532	0.144466	1.21517	0.281154	24	0.00345015	0.00983293	2.00732	0.151943	TRUE
SPNCRNA.175	HU20mM-40h	1.12936	0.175506	1.2277	0.295954	1.15776	0.211334	1.27281	0.348022	20	0.00136103	0.00738846	2.13145	0.161906	TRUE
SPNCRNA.175	HU5mM-40h	0.976127	-0.0348593	1.06112	0.0855896	0.95194	-0.071057	1.04654	0.0656309	36	0.237432	0.398047	0.400066	0.0947997	FALSE
SPNCRNA.175	MMS0.005-40h	1.02745	0.039073	1.11692	0.159522	1.01043	0.014967	1.11084	0.151655	31	0.176199	0.436667	0.35985	0.0883807	FALSE
SPNCRNA.175	MMS0.0075-40h	0.996915	-0.00445793	1.08372	0.115991	0.981366	-0.0271365	1.07889	0.109551	24	0.912354	0.951291	0.0216866	0.128634	FALSE
SPNCRNA.175	Rap100ng-40h	0.925719	-0.111354	1.00632	0.00909491	0.891685	-0.165394	0.980299	-0.0287066	36	0.00554367	0.116884	0.932244	0.142656	FALSE
SPNCRNA.175	SDS0.001-40h	1.05248	0.0737927	1.14412	0.194242	1.03749	0.0530975	1.14059	0.189785	20	0.127535	0.196473	0.706698	0.147715	FALSE
SPNCRNA.175	SDS0.005-40h	1.02819	0.040112	1.11772	0.160561	1.0241	0.0343526	1.12587	0.17104	20	0.15482	0.395022	0.403378	0.06726	FALSE
SPNCRNA.175	Sorb1.2M-40h	1.05243	0.0737255	1.14407	0.194174	1.03635	0.0515068	1.13934	0.188195	10	0.130866	0.276272	0.558663	0.101336	FALSE
SPNCRNA.175	TSA500nM-40h	0.917074	-0.12489	0.996927	-0.00444085	0.935932	-0.0955245	1.02894	0.0411634	24	0.0149507	0.0470669	1.32728	0.155683	FALSE
SPNCRNA.175	Temp32C-40h	0.962974	-0.0544316	1.04682	0.0660173	0.928808	-0.106547	1.02111	0.0301405	28	0.18088	0.494653	0.3057	0.135051	FALSE
SPNCRNA.175	Temp37C-40h	1.05192	0.0730247	1.14351	0.193474	1.04722	0.0665629	1.15129	0.203251	36	0.0475508	0.0933185	1.03003	0.141264	FALSE
SPNCRNA.175	Torin5uM-40h	0.963448	-0.0537218	1.04734	0.0667271	0.960745	-0.0577746	1.05622	0.0789133	23	0.107884	0.292827	0.533389	0.0914346	FALSE
SPNCRNA.175	VPA3mM-40h	0.993295	-0.00970575	1.07978	0.110743	1.0311	0.0441831	1.13357	0.180871	32	0.818605	0.880387	0.0553265	0.157213	FALSE
SPNCRNA.175	VPA5mM-40h	1.20117	0.264443	1.30576	0.384892	1.15082	0.20266	1.26518	0.339347	12	0.00121357	0.00364071	2.43881	0.176445	TRUE
SPNCRNA.177	Ant0.1ng-40h	0.926704	-0.109819	0.934333	-0.0979913	0.928296	-0.107343	0.91519	-0.127856	12	0.00361815	0.041247	1.38461	0.0627694	FALSE
SPNCRNA.177	Ant1ng-40h	1.0039	0.00561911	1.01217	0.017447	1.05434	0.0763374	1.03945	0.0558239	16	0.881069	0.910561	0.0406911	0.0863105	FALSE
SPNCRNA.177	Bleo20ug-40h	0.782036	-0.354693	0.788474	-0.342865	0.818823	-0.288377	0.807262	-0.308891	12	0.00403027	0.0191438	1.71797	0.209921	FALSE
SPNCRNA.177	Caff10mM-40h	1.11915	0.162399	1.12836	0.174227	1.14819	0.199365	1.13198	0.178851	12	5.35391e-11	6.10346e-09	8.21442	0.0233145	TRUE
SPNCRNA.177	Can60ug-40h	0.936736	-0.094286	0.944447	-0.0824581	1.01791	0.0256072	1.00354	0.00509366	32	0.037928	0.0882406	1.05433	0.147715	FALSE
SPNCRNA.177	CoCl0.25mM-40h	1.03765	0.0533232	1.04619	0.0651511	1.08159	0.113156	1.06632	0.092643	24	0.153922	0.461767	0.335577	0.106332	FALSE
SPNCRNA.177	Diam2mM-40h	1.02908	0.0413503	1.03755	0.0531782	1.06177	0.0864657	1.04678	0.0659522	12	0.290619	0.414824	0.382136	0.0788085	FALSE
SPNCRNA.177	EGTA10mM-40h									0					FALSE
SPNCRNA.177	EMM_Arg-40h	0.976543	-0.0342452	0.984582	-0.0224174	1.04249	0.0600307	1.02777	0.0395172	4	0.808105	0.925356	0.033691	0.176827	FALSE
SPNCRNA.177	EMM_Cyst-40h	1.05707	0.0800651	1.06577	0.091893	1.08123	0.112677	1.06597	0.0921639	4	0.190273	0.417137	0.379722	0.0677421	FALSE
SPNCRNA.177	EMM_Gal2-40h									0					FALSE
SPNCRNA.177	EMM_Glu-40h	1.01967	0.0281054	1.02807	0.0399333	1.03201	0.0454635	1.01744	0.02495	24	0.264824	0.565473	0.247588	0.0485517	FALSE
SPNCRNA.177	EMM_Gluc2-40h	0.99835	-0.00238287	1.00657	0.00944502	1.05024	0.0707194	1.03541	0.0502059	12	0.963918	0.993136	0.00299143	0.114663	FALSE
SPNCRNA.177	EMM_Gluc3-40h	0.982683	-0.0252026	0.990772	-0.0133748	1.02704	0.038486	1.01254	0.0179725	16	0.538303	0.801368	0.096168	0.0955411	FALSE
SPNCRNA.177	EMM_Gly3-40h	0.973251	-0.0391167	0.981263	-0.0272888	1.02032	0.0290273	1.00592	0.00851376	4	0.479228	0.581916	0.23514	0.0633964	FALSE
SPNCRNA.177	EMM_NH4Cl-40h	1	0	1.00823	0.0118279	1	0	0.985882	-0.0205135	83	1	1	0	0.133469	FALSE
SPNCRNA.177	EMM_Phe-40h	1.05639	0.0791386	1.06508	0.0909665	1.09677	0.133264	1.08129	0.112751	12	0.326762	0.539867	0.267713	0.186276	FALSE
SPNCRNA.177	EMM_Pro-40h	1.1012	0.139076	1.11027	0.150904	1.12569	0.170814	1.1098	0.1503	12	3.36285e-08	3.81471e-07	6.41854	0.0280575	TRUE
SPNCRNA.177	H2O2_0.5mM-40h	1.03616	0.0512504	1.04469	0.0630783	1.05942	0.0832699	1.04446	0.0627564	12	0.0165877	0.0945496	1.02434	0.00989226	FALSE
SPNCRNA.177	H2O2_1mM-40h	1.07524	0.104658	1.08409	0.116486	1.04171	0.0589475	1.027	0.038434	16	0.0341216	0.29922	0.524009	0.121124	FALSE
SPNCRNA.177	H2O2_3mM-40h	1.09606	0.132332	1.10509	0.14416	1.11888	0.162059	1.10309	0.141545	12	1.1029e-05	0.000628652	3.20159	0.0453313	TRUE
SPNCRNA.177	HU10mM-40h	1.0536	0.0753238	1.06227	0.0871517	1.08501	0.11771	1.06969	0.0971967	36	0.0283474	0.0621461	1.20659	0.115417	FALSE
SPNCRNA.177	HU20mM-40h	1.0455	0.0642	1.05411	0.0760278	1.04331	0.0611678	1.02858	0.0406543	32	0.145173	0.239852	0.620057	0.154545	FALSE
SPNCRNA.177	HU5mM-40h	1.01984	0.0283474	1.02824	0.0401752	1.05971	0.083668	1.04475	0.0631545	36	0.33584	0.510476	0.292024	0.0876258	FALSE
SPNCRNA.177	MMS0.005-40h	0.981039	-0.0276175	0.989115	-0.0157896	1.01344	0.0192631	0.999134	-0.00125044	36	0.37076	0.587037	0.231335	0.0924094	FALSE
SPNCRNA.177	MMS0.0075-40h	0.895813	-0.158731	0.903187	-0.146903	0.924635	-0.113044	0.911581	-0.133558	36	1.90632e-05	0.000580233	3.2364	0.10742	TRUE
SPNCRNA.177	Rap100ng-40h	0.962273	-0.0554816	0.970195	-0.0436537	0.982129	-0.0260154	0.968263	-0.0465289	20	0.29559	0.635797	0.196681	0.145435	FALSE
SPNCRNA.177	SDS0.001-40h	0.959226	-0.0600575	0.967122	-0.0482296	0.990869	-0.0132333	0.97688	-0.0337468	36	0.0531305	0.106261	0.973626	0.0902377	FALSE
SPNCRNA.177	SDS0.005-40h	1.02385	0.0340072	1.03228	0.0458351	1.04312	0.0609102	1.0284	0.0403967	28	0.243123	0.513259	0.289664	0.0755535	FALSE
SPNCRNA.177	Sorb1.2M-40h	0.824904	-0.277702	0.831695	-0.265874	0.927462	-0.10864	0.914368	-0.129153	12	0.00401528	0.0277714	1.5564	0.168126	FALSE
SPNCRNA.177	TSA500nM-40h									0					FALSE
SPNCRNA.177	Temp32C-40h	1.00297	0.00427584	1.01122	0.0161037	1.01377	0.0197278	0.999456	-0.000785666	24	0.870947	0.931434	0.0308477	0.0543003	FALSE
SPNCRNA.177	Temp37C-40h	1.10596	0.1453	1.11507	0.157128	1.06927	0.0966283	1.05418	0.0761148	20	0.000808876	0.00512288	2.29049	0.111929	TRUE
SPNCRNA.177	Torin5uM-40h	0.964427	-0.0522566	0.972366	-0.0404287	1.03364	0.047734	1.01905	0.0272205	24	0.2897	0.516028	0.287327	0.146817	FALSE
SPNCRNA.177	VPA3mM-40h	1.03784	0.0535793	1.04638	0.0654072	1.07009	0.0977272	1.05498	0.0772137	8	0.212596	0.384698	0.41488	0.0709142	FALSE
SPNCRNA.177	VPA5mM-40h	1.08477	0.117391	1.0937	0.129219	1.11344	0.155024	1.09772	0.134511	12	0.00145127	0.00424219	2.37241	0.0661045	TRUE
SPNCRNA.187	Ant0.1ng-40h	0.977409	-0.0329656	1.02505	0.0356916	0.997357	-0.00381773	1.0577	0.0809279	35	0.393554	0.614591	0.211414	0.125763	FALSE
SPNCRNA.187	Ant1ng-40h	1.03244	0.0460566	1.08276	0.114714	1.0494	0.0695632	1.11289	0.154309	36	0.263632	0.455364	0.341642	0.147078	FALSE
SPNCRNA.187	Bleo20ug-40h	1.03975	0.0562311	1.09042	0.124888	1.06257	0.0875561	1.12685	0.172302	17	0.419658	0.525725	0.279241	0.195624	FALSE
SPNCRNA.187	Caff10mM-40h	1.02118	0.030242	1.07096	0.0988993	0.996739	-0.00471273	1.05704	0.0800329	36	0.375347	0.620138	0.207512	0.105881	FALSE
SPNCRNA.187	Can60ug-40h	1.04612	0.065043	1.0971	0.1337	1.06561	0.091681	1.13008	0.176427	24	0.104697	0.186491	0.729343	0.114585	FALSE
SPNCRNA.187	CoCl0.25mM-40h	1.05328	0.0748826	1.10461	0.14354	1.1297	0.175943	1.19805	0.260689	12	0.515997	0.794915	0.0996794	0.282695	FALSE
SPNCRNA.187	Diam2mM-40h	1.00586	0.00842722	1.05488	0.0770845	1.02924	0.0415858	1.09151	0.126332	12	0.894239	0.911696	0.04015	0.145086	FALSE
SPNCRNA.187	EGTA10mM-40h	1.01329	0.0190523	1.06268	0.0877095	1.01738	0.0248517	1.07893	0.109597	12	0.661604	0.749818	0.125044	0.0901398	FALSE
SPNCRNA.187	EMM_Arg-40h	0.912781	-0.131659	0.95727	-0.063002	0.883483	-0.178726	0.936934	-0.0939806	22	0.0593177	0.187839	0.726214	0.202123	FALSE
SPNCRNA.187	EMM_Cyst-40h	1.1751	0.232779	1.23237	0.301437	1.1668	0.222558	1.23739	0.307303	12	7.41482e-05	0.000845289	3.07299	0.110023	TRUE
SPNCRNA.187	EMM_Gal2-40h	0.982998	-0.0247398	1.03091	0.0439174	0.971884	-0.0411443	1.03068	0.0436014	23	0.574006	0.728794	0.137395	0.12506	FALSE
SPNCRNA.187	EMM_Glu-40h	1.06516	0.0910759	1.11708	0.159733	1.02114	0.0301769	1.08292	0.114923	36	0.0378159	0.287401	0.541512	0.16203	FALSE
SPNCRNA.187	EMM_Gluc2-40h	1.08153	0.113072	1.13424	0.18173	1.09794	0.134801	1.16437	0.219547	12	0.482295	0.753172	0.123106	0.403326	FALSE
SPNCRNA.187	EMM_Gluc3-40h	1.01847	0.0264047	1.06811	0.0950619	1.02737	0.0389526	1.08952	0.123698	12	0.407174	0.700704	0.154465	0.0520849	FALSE
SPNCRNA.187	EMM_Gly3-40h	0.833826	-0.262182	0.874467	-0.193525	0.869978	-0.20095	0.922612	-0.116204	20	0.000905675	0.00860391	2.0653	0.19236	TRUE
SPNCRNA.187	EMM_NH4Cl-40h	1	0	1.04874	0.0686572	1	0	1.0605	0.0847457	119	1	1	0	0.192507	FALSE
SPNCRNA.187	EMM_Phe-40h	0.860971	-0.215964	0.902934	-0.147307	0.931598	-0.10222	0.987961	-0.0174744	24	0.0641416	0.193758	0.712739	0.359012	FALSE
SPNCRNA.187	EMM_Pro-40h	1.21774	0.284208	1.27709	0.352865	1.15102	0.202908	1.22065	0.287654	36	1.694e-07	1.17041e-06	5.93166	0.203171	TRUE
SPNCRNA.187	H2O2_0.5mM-40h	1.03733	0.0528748	1.08789	0.121532	1.0105	0.0150676	1.07163	0.0998133	35	0.178672	0.351183	0.454466	0.13503	FALSE
SPNCRNA.187	H2O2_1mM-40h	1.04428	0.0625115	1.09518	0.131169	1.00361	0.00519608	1.06433	0.0899417	24	0.210025	0.598571	0.222884	0.156138	FALSE
SPNCRNA.187	H2O2_3mM-40h	1.09272	0.127925	1.14598	0.196582	1.0661	0.0923374	1.1306	0.177083	24	0.00194539	0.014785	1.83018	0.117529	FALSE
SPNCRNA.187	HU10mM-40h	1.09363	0.129123	1.14693	0.19778	1.09638	0.132753	1.16272	0.217498	24	0.0570763	0.110283	0.957491	0.227205	FALSE
SPNCRNA.187	HU20mM-40h	1.10625	0.145675	1.16017	0.214332	1.11949	0.162839	1.18722	0.247585	20	0.0030335	0.0111555	1.95251	0.134536	FALSE
SPNCRNA.187	HU5mM-40h	1.04242	0.0599376	1.09323	0.128595	1.02423	0.0345399	1.0862	0.119286	36	0.122946	0.286039	0.543575	0.134621	FALSE
SPNCRNA.187	MMS0.005-40h	0.973972	-0.0380471	1.02144	0.0306101	0.961203	-0.0570865	1.01936	0.0276591	32	0.430039	0.612805	0.212677	0.166624	FALSE
SPNCRNA.187	MMS0.0075-40h	1.03186	0.0452484	1.08215	0.113906	1.07855	0.109089	1.1438	0.193835	24	0.478559	0.708516	0.14965	0.211215	FALSE
SPNCRNA.187	Rap100ng-40h	0.999275	-0.00104615	1.04798	0.0676111	0.931595	-0.102225	0.987957	-0.0174797	36	0.985574	0.989853	0.00442919	0.227596	FALSE
SPNCRNA.187	SDS0.001-40h	1.07541	0.104884	1.12782	0.173541	1.08821	0.121954	1.15404	0.206699	19	0.0229859	0.0543188	1.26505	0.122652	FALSE
SPNCRNA.187	SDS0.005-40h	0.998117	-0.00271925	1.04677	0.065938	1.00204	0.00293597	1.06266	0.0876816	20	0.955165	0.994663	0.00232397	0.134476	FALSE
SPNCRNA.187	Sorb1.2M-40h	0.833474	-0.262791	0.874098	-0.194133	0.849317	-0.235625	0.900701	-0.150879	11	0.0207256	0.081473	1.08899	0.20853	FALSE
SPNCRNA.187	TSA500nM-40h	0.998044	-0.00282438	1.04669	0.0658329	1.01298	0.0186046	1.07427	0.10335	24	0.937028	0.948184	0.0231076	0.0926643	FALSE
SPNCRNA.187	Temp32C-40h	0.98192	-0.0263227	1.02978	0.0423345	0.962739	-0.0547841	1.02098	0.0299616	28	0.475302	0.790347	0.102182	0.104113	FALSE
SPNCRNA.187	Temp37C-40h	1.08954	0.123723	1.14265	0.19238	1.06842	0.0954824	1.13306	0.180228	35	0.00220032	0.00920497	2.03598	0.140709	TRUE
SPNCRNA.187	Torin5uM-40h	1.08134	0.112823	1.13405	0.181481	1.06948	0.0969087	1.13418	0.181654	24	0.000325901	0.00588994	2.22989	0.0715067	TRUE
SPNCRNA.187	VPA3mM-40h	0.968442	-0.0462629	1.01564	0.0223943	1.00829	0.011904	1.06929	0.0966497	30	0.45323	0.607861	0.216196	0.219008	FALSE
SPNCRNA.187	VPA5mM-40h	0.996336	-0.00529612	1.0449	0.0633611	0.858093	-0.220794	0.910009	-0.136048	12	0.969156	0.969156	0.0136064	0.331438	FALSE
SPNCRNA.188	Ant0.1ng-40h	1.05017	0.0706254	1.06811	0.0950572	1.07848	0.108993	1.07832	0.108779	12	0.0629755	0.211153	0.675402	0.0622183	FALSE
SPNCRNA.188	Ant1ng-40h	0.980945	-0.0277553	0.997699	-0.00332343	0.997602	-0.00346315	0.997454	-0.00367708	16	0.471209	0.631975	0.1993	0.0715676	FALSE
SPNCRNA.188	Bleo20ug-40h	0.891312	-0.165998	0.906535	-0.141566	0.92394	-0.114129	0.923803	-0.114343	12	0.00028714	0.00327339	2.485	0.0674852	TRUE
SPNCRNA.188	Caff10mM-40h	1.04774	0.0672797	1.06563	0.0917116	1.06811	0.0950558	1.06795	0.0948419	12	0.0860161	0.22286	0.651968	0.0664335	FALSE
SPNCRNA.188	Can60ug-40h	0.970835	-0.0427013	0.987416	-0.0182694	1.01787	0.0255494	1.01772	0.0253355	31	0.289161	0.382549	0.417313	0.108517	FALSE
SPNCRNA.188	CoCl0.25mM-40h	0.980175	-0.0288887	0.996916	-0.00445678	1.07371	0.102601	1.07355	0.102387	23	0.66924	0.862331	0.0643258	0.203095	FALSE
SPNCRNA.188	Diam2mM-40h	0.915796	-0.126902	0.931437	-0.10247	0.9584	-0.0613001	0.958258	-0.061514	12	0.0677673	0.143064	0.844469	0.135791	FALSE
SPNCRNA.188	EGTA10mM-40h									0					FALSE
SPNCRNA.188	EMM_Arg-40h	1.16296	0.217802	1.18282	0.242234	1.21079	0.275949	1.21061	0.275735	4	0.187332	0.423768	0.372872	0.195071	FALSE
SPNCRNA.188	EMM_Cyst-40h	0.916481	-0.125823	0.932134	-0.101391	0.956368	-0.0643619	0.956226	-0.0645758	4	0.276623	0.488927	0.310756	0.126701	FALSE
SPNCRNA.188	EMM_Gal2-40h	0.972458	-0.0402915	0.989067	-0.0158596	1.00762	0.0109586	1.00748	0.0107447	12	0.383163	0.561977	0.250281	0.085274	FALSE
SPNCRNA.188	EMM_Glu-40h	1.01269	0.0181916	1.02999	0.0426235	1.02535	0.0361201	1.0252	0.0359062	24	0.630065	0.796105	0.0990294	0.0874386	FALSE
SPNCRNA.188	EMM_Gluc2-40h	0.921978	-0.117196	0.937724	-0.0927641	1.06526	0.0912017	1.0651	0.0909877	12	0.361771	0.63449	0.197575	0.281988	FALSE
SPNCRNA.188	EMM_Gluc3-40h	1.03492	0.0495239	1.0526	0.0739558	1.05249	0.0738113	1.05234	0.0735974	16	0.543349	0.801368	0.096168	0.215476	FALSE
SPNCRNA.188	EMM_Gly3-40h	0.902966	-0.147256	0.918388	-0.122825	0.885021	-0.176216	0.88489	-0.17643	4	0.182334	0.324782	0.488407	0.114218	FALSE
SPNCRNA.188	EMM_NH4Cl-40h	1	0	1.01708	0.0244319	1	0	0.999852	-0.000213931	84	1	1	0	0.181928	FALSE
SPNCRNA.188	EMM_Phe-40h	0.945038	-0.0815552	0.961179	-0.0571233	0.984657	-0.0223072	0.984511	-0.0225211	12	0.146454	0.333608	0.476764	0.108494	FALSE
SPNCRNA.188	EMM_Pro-40h	1.06772	0.0945322	1.08595	0.118964	1.07629	0.106068	1.07613	0.105854	12	0.0055027	0.0116168	1.93491	0.0468308	FALSE
SPNCRNA.188	H2O2_0.5mM-40h	1.01128	0.0161886	1.02856	0.0406204	1.03834	0.0542773	1.03818	0.0540633	12	0.595089	0.747538	0.126367	0.0287952	FALSE
SPNCRNA.188	H2O2_1mM-40h	1.01244	0.017842	1.02974	0.0422738	1.00828	0.0119011	1.00813	0.0116872	16	0.634888	0.836813	0.0773714	0.070329	FALSE
SPNCRNA.188	H2O2_3mM-40h	1.07149	0.099624	1.08979	0.124056	1.11583	0.158117	1.11566	0.157904	12	0.0224968	0.0754306	1.12245	0.0792857	FALSE
SPNCRNA.188	HU10mM-40h	0.995494	-0.00651513	1.0125	0.0179168	1.01315	0.0188418	1.013	0.0186279	35	0.878189	0.911618	0.0401869	0.131596	FALSE
SPNCRNA.188	HU20mM-40h	1.0446	0.0629472	1.06244	0.0873791	1.0274	0.039004	1.02725	0.0387901	32	0.129801	0.220855	0.655892	0.12452	FALSE
SPNCRNA.188	HU5mM-40h	0.968396	-0.0463307	0.984935	-0.0218989	0.982499	-0.025472	0.982353	-0.025686	36	0.168885	0.343802	0.463691	0.0722858	FALSE
SPNCRNA.188	MMS0.005-40h	1.03568	0.0505778	1.05337	0.0750097	1.0769	0.10688	1.07674	0.106666	36	0.118887	0.351623	0.453922	0.070889	FALSE
SPNCRNA.188	MMS0.0075-40h	1.05196	0.0730801	1.06993	0.097512	1.0749	0.104199	1.07474	0.103985	36	0.0202935	0.115673	0.936769	0.0629697	FALSE
SPNCRNA.188	Rap100ng-40h	1.01082	0.0155305	1.02809	0.0399624	1.03094	0.0439607	1.03079	0.0437467	27	0.747071	0.875967	0.0575122	0.143196	FALSE
SPNCRNA.188	SDS0.001-40h	0.988356	-0.0168976	1.00524	0.00753431	0.993944	-0.00876411	0.993796	-0.00897804	36	0.661588	0.698343	0.155931	0.109631	FALSE
SPNCRNA.188	SDS0.005-40h	1.00391	0.00563101	1.02106	0.0300629	1.01831	0.0261799	1.01816	0.025966	28	0.890985	0.986139	0.00606174	0.111325	FALSE
SPNCRNA.188	Sorb1.2M-40h	0.975201	-0.0362285	0.991857	-0.0117966	0.98909	-0.0158268	0.988943	-0.0160408	12	0.504468	0.61838	0.208745	0.108749	FALSE
SPNCRNA.188	TSA500nM-40h									0					FALSE
SPNCRNA.188	Temp32C-40h	1.0357	0.0506026	1.05339	0.0750345	1.0186	0.0265845	1.01845	0.0263705	24	0.212517	0.538377	0.268914	0.102555	FALSE
SPNCRNA.188	Temp37C-40h	1.10542	0.144593	1.1243	0.169025	1.05116	0.0719865	1.05101	0.0717726	20	0.00664547	0.0194252	1.71163	0.140745	FALSE
SPNCRNA.188	Torin5uM-40h	0.991617	-0.0121454	1.00855	0.0122865	0.998184	-0.0026223	0.998036	-0.00283623	24	0.810134	0.93501	0.0291837	0.14293	FALSE
SPNCRNA.188	VPA3mM-40h	0.905187	-0.143713	0.920647	-0.119281	0.915596	-0.127217	0.91546	-0.127431	8	0.0011372	0.00818305	2.08708	0.0510846	TRUE
SPNCRNA.188	VPA5mM-40h	1.08989	0.124177	1.1085	0.148609	1.1103	0.150953	1.11014	0.150739	11	0.0196204	0.0406677	1.39075	0.099833	FALSE
SPNCRNA.189	Ant0.1ng-40h	0.991645	-0.0121038	1.04428	0.0625094	1.00863	0.0123927	1.05289	0.0743483	12	0.799773	0.905508	0.0431076	0.100772	FALSE
SPNCRNA.189	Ant1ng-40h	0.943922	-0.0832606	0.994024	-0.00864736	0.958029	-0.0618594	1.00007	9.62852e-05	16	0.0343268	0.111931	0.95105	0.0804402	FALSE
SPNCRNA.189	Bleo20ug-40h	0.912652	-0.131863	0.961095	-0.0572495	0.96056	-0.0580519	1.00271	0.00390373	12	0.020875	0.0655703	1.18329	0.109927	FALSE
SPNCRNA.189	Caff10mM-40h	1.01399	0.0200462	1.06781	0.0946595	1.06133	0.0858668	1.1079	0.147822	12	0.684479	0.85748	0.0667761	0.106754	FALSE
SPNCRNA.189	Can60ug-40h	0.985928	-0.0204459	1.03826	0.0541673	0.972465	-0.0402817	1.01514	0.0216739	31	0.599983	0.710731	0.148295	0.120088	FALSE
SPNCRNA.189	CoCl0.25mM-40h	0.962085	-0.055764	1.01315	0.0188492	0.967935	-0.0470185	1.01041	0.0149372	24	0.142097	0.461767	0.335577	0.0974041	FALSE
SPNCRNA.189	Diam2mM-40h	0.938601	-0.0914156	0.988421	-0.0168023	0.96929	-0.0450003	1.01182	0.0169554	12	0.00836956	0.0307784	1.51175	0.0524132	FALSE
SPNCRNA.189	EGTA10mM-40h									0					FALSE
SPNCRNA.189	EMM_Arg-40h	1.00966	0.0138695	1.06325	0.0884827	1.01181	0.0169378	1.05621	0.0788935	4	0.893832	0.964932	0.0155033	0.136979	FALSE
SPNCRNA.189	EMM_Cyst-40h	0.997008	-0.00432292	1.04993	0.0702903	0.981986	-0.0262263	1.02507	0.0357293	4	0.936895	0.979675	0.0089178	0.0665406	FALSE
SPNCRNA.189	EMM_Gal2-40h	0.990388	-0.0139344	1.04296	0.0606788	0.982268	-0.0258119	1.02537	0.0361438	12	0.720866	0.83448	0.0785843	0.0743967	FALSE
SPNCRNA.189	EMM_Glu-40h	1.00992	0.0142416	1.06353	0.0888548	0.976506	-0.034299	1.01936	0.0276567	24	0.720262	0.837855	0.076831	0.111279	FALSE
SPNCRNA.189	EMM_Gluc2-40h	0.938265	-0.0919327	0.988067	-0.0173194	0.958086	-0.0617729	1.00013	0.000182776	12	0.0418911	0.193731	0.712801	0.0844286	FALSE
SPNCRNA.189	EMM_Gluc3-40h	0.91546	-0.127431	0.964051	-0.052818	0.940621	-0.0883152	0.981895	-0.0263596	16	0.00329556	0.072003	1.14265	0.0878075	FALSE
SPNCRNA.189	EMM_Gly3-40h	0.89871	-0.154072	0.946413	-0.0794588	0.94413	-0.0829432	0.985558	-0.0209875	4	0.242151	0.372707	0.428633	0.1463	FALSE
SPNCRNA.189	EMM_NH4Cl-40h	1	0	1.05308	0.0746132	1	0	1.04388	0.0619557	83	1	1	0	0.164594	FALSE
SPNCRNA.189	EMM_Phe-40h	0.99994	-8.63527e-05	1.05302	0.0745269	0.988546	-0.01662	1.03192	0.0453357	12	0.998338	0.998338	0.00072231	0.0828495	FALSE
SPNCRNA.189	EMM_Pro-40h	1.02163	0.0308774	1.07586	0.105491	1.03367	0.0477693	1.07902	0.109725	11	0.293393	0.402974	0.394723	0.0387413	FALSE
SPNCRNA.189	H2O2_0.5mM-40h	0.960536	-0.0580885	1.01152	0.0165247	0.988695	-0.016403	1.03208	0.0455527	11	0.0839649	0.227905	0.642247	0.0500612	FALSE
SPNCRNA.189	H2O2_1mM-40h	0.980612	-0.0282464	1.03266	0.0463669	0.984453	-0.0226057	1.02765	0.03935	15	0.486287	0.791953	0.101301	0.0879319	FALSE
SPNCRNA.189	H2O2_3mM-40h	1.02002	0.0285939	1.07416	0.103207	1.02174	0.0310269	1.06657	0.0929826	12	0.369011	0.532497	0.273683	0.0507879	FALSE
SPNCRNA.189	HU10mM-40h	0.974312	-0.0375437	1.02603	0.0370695	0.965005	-0.0513919	1.00735	0.0105638	34	0.351843	0.501376	0.299836	0.131362	FALSE
SPNCRNA.189	HU20mM-40h	1.00864	0.0124079	1.06217	0.0870211	1.03732	0.0528635	1.08284	0.114819	31	0.81142	0.906881	0.0424498	0.185607	FALSE
SPNCRNA.189	HU5mM-40h	0.956241	-0.0645538	1.007	0.0100594	0.971806	-0.0412599	1.01445	0.0206958	36	0.0312347	0.13188	0.879822	0.065794	FALSE
SPNCRNA.189	MMS0.005-40h	0.986311	-0.0198856	1.03866	0.0547276	1.00935	0.0134336	1.05365	0.0753892	35	0.505309	0.647249	0.188928	0.0697441	FALSE
SPNCRNA.189	MMS0.0075-40h	0.954222	-0.0676038	1.00487	0.00700942	0.988618	-0.0165147	1.032	0.0454409	35	0.0534187	0.21749	0.66256	0.0993724	FALSE
SPNCRNA.189	Rap100ng-40h	0.982866	-0.0249328	1.03504	0.0496804	1.00272	0.00392583	1.04672	0.0658815	28	0.531326	0.738673	0.131548	0.117792	FALSE
SPNCRNA.189	SDS0.001-40h	0.954615	-0.0670097	1.00528	0.00760351	0.941404	-0.0871141	0.982713	-0.0251584	34	0.0815081	0.138685	0.857969	0.117865	FALSE
SPNCRNA.189	SDS0.005-40h	1.03054	0.0433979	1.08524	0.118011	1.04483	0.0632685	1.09068	0.125224	27	0.15593	0.395022	0.403378	0.0696451	FALSE
SPNCRNA.189	Sorb1.2M-40h	0.932933	-0.100155	0.982451	-0.025542	0.939598	-0.0898845	0.980827	-0.0279288	12	0.096781	0.220661	0.656275	0.124393	FALSE
SPNCRNA.189	TSA500nM-40h									0					FALSE
SPNCRNA.189	Temp32C-40h	1.02269	0.032362	1.07697	0.106975	1.02461	0.0350749	1.06957	0.0970306	24	0.467343	0.790347	0.102182	0.132893	FALSE
SPNCRNA.189	Temp37C-40h	1.07699	0.107006	1.13416	0.181619	1.00659	0.00948023	1.05076	0.0714359	20	0.070218	0.112744	0.947905	0.174769	FALSE
SPNCRNA.189	Torin5uM-40h	0.973114	-0.0393187	1.02477	0.0352946	0.99937	-0.000908885	1.04322	0.0610468	24	0.259986	0.478038	0.320538	0.0842781	FALSE
SPNCRNA.189	VPA3mM-40h	1.05456	0.0766344	1.11053	0.151248	1.04987	0.0702111	1.09594	0.132167	8	0.0522143	0.160876	0.793507	0.0598819	FALSE
SPNCRNA.189	VPA5mM-40h	1.17155	0.228423	1.23374	0.303037	1.16489	0.220193	1.216	0.282149	12	1.12688e-09	4.28213e-08	7.36834	0.0545619	TRUE
SPNCRNA.190	Ant0.1ng-40h	0.9755	-0.0357865	1.0181	0.0258787	0.985339	-0.0213073	1.02219	0.0316605	18	0.307149	0.547195	0.261858	0.0844783	FALSE
SPNCRNA.190	Ant1ng-40h	0.988429	-0.016791	1.03159	0.0448742	1.00656	0.00943955	1.04421	0.0624073	24	0.554024	0.699736	0.155066	0.0691111	FALSE
SPNCRNA.190	Bleo20ug-40h	0.908646	-0.13821	0.948326	-0.0765447	0.981602	-0.0267904	1.01831	0.0261773	18	0.0264188	0.0752935	1.12324	0.158551	FALSE
SPNCRNA.190	Caff10mM-40h	1.02787	0.0396533	1.07275	0.101318	1.03871	0.0547978	1.07756	0.107766	18	0.195965	0.398928	0.399106	0.0707589	FALSE
SPNCRNA.190	Can60ug-40h	1.01481	0.0212045	1.05912	0.0828697	1.01916	0.0273833	1.05728	0.0803511	48	0.4534	0.567996	0.245655	0.100004	FALSE
SPNCRNA.190	CoCl0.25mM-40h	0.888399	-0.17072	0.927195	-0.109055	0.965056	-0.051316	1.00115	0.00165172	35	0.00732825	0.0642631	1.19204	0.229294	FALSE
SPNCRNA.190	Diam2mM-40h	0.940505	-0.0884926	0.981576	-0.0268274	0.995228	-0.00690121	1.03245	0.0460665	18	0.133638	0.230829	0.63671	0.157538	FALSE
SPNCRNA.190	EGTA10mM-40h									0					FALSE
SPNCRNA.190	EMM_Arg-40h	1.1784	0.236824	1.22986	0.29849	1.15055	0.202329	1.19358	0.255297	6	0.0895828	0.265949	0.575202	0.216733	FALSE
SPNCRNA.190	EMM_Cyst-40h	0.935204	-0.0966472	0.976044	-0.034982	0.968199	-0.0466251	1.00441	0.00634268	6	0.178013	0.402789	0.394922	0.103177	FALSE
SPNCRNA.190	EMM_Gal2-40h	1.02252	0.0321227	1.06717	0.0937879	1.0145	0.020769	1.05244	0.0737368	18	0.379996	0.561977	0.250281	0.0933498	FALSE
SPNCRNA.190	EMM_Glu-40h	1.03086	0.0438458	1.07588	0.105511	0.996848	-0.00455396	1.03413	0.0484138	36	0.277415	0.565473	0.247588	0.152885	FALSE
SPNCRNA.190	EMM_Gluc2-40h	0.889454	-0.169008	0.928296	-0.107343	0.944222	-0.0828026	0.979532	-0.0298348	18	0.0191818	0.145782	0.836296	0.182777	FALSE
SPNCRNA.190	EMM_Gluc3-40h	0.857995	-0.220959	0.895463	-0.159294	0.927955	-0.107873	0.962658	-0.0549048	24	0.0339985	0.203991	0.690389	0.31597	FALSE
SPNCRNA.190	EMM_Gly3-40h	0.855294	-0.225508	0.892644	-0.163843	0.845843	-0.241539	0.877474	-0.188571	5	0.044401	0.133203	0.875486	0.118914	FALSE
SPNCRNA.190	EMM_NH4Cl-40h	1	0	1.04367	0.0616652	1	0	1.0374	0.0529677	126	1	1	0	0.164227	FALSE
SPNCRNA.190	EMM_Phe-40h	0.940303	-0.0888028	0.981365	-0.0271376	0.962817	-0.0546666	0.998823	-0.00169883	18	0.106044	0.262805	0.580366	0.144565	FALSE
SPNCRNA.190	EMM_Pro-40h	1.01854	0.0265037	1.06302	0.0881688	1.02427	0.0345994	1.06258	0.0875672	18	0.336319	0.441347	0.35522	0.0577364	FALSE
SPNCRNA.190	H2O2_0.5mM-40h	0.991011	-0.0130276	1.03429	0.0486376	1.01228	0.0176123	1.05014	0.07058	18	0.591071	0.747538	0.126367	0.0400441	FALSE
SPNCRNA.190	H2O2_1mM-40h	1.01188	0.0170437	1.05607	0.0787088	0.998198	-0.00260277	1.03553	0.050365	24	0.602121	0.836813	0.0773714	0.0910648	FALSE
SPNCRNA.190	H2O2_3mM-40h	1.03078	0.0437383	1.0758	0.105403	1.04979	0.0701017	1.08905	0.123069	18	0.118636	0.237272	0.624754	0.0597516	FALSE
SPNCRNA.190	HU10mM-40h	0.9825	-0.0254713	1.0254	0.0361938	0.999151	-0.00122553	1.03652	0.0517422	52	0.400233	0.563291	0.249267	0.115013	FALSE
SPNCRNA.190	HU20mM-40h	0.994449	-0.0080302	1.03788	0.053635	1.0201	0.0287112	1.05825	0.0816789	45	0.836475	0.911677	0.0401589	0.159948	FALSE
SPNCRNA.190	HU5mM-40h	0.987898	-0.0175666	1.03104	0.0440985	1.00382	0.00550431	1.04136	0.0584721	54	0.503013	0.636051	0.196508	0.0869786	FALSE
SPNCRNA.190	MMS0.005-40h	0.967235	-0.0480613	1.00947	0.0136038	1.00205	0.00295964	1.03953	0.0559274	54	0.0943489	0.325933	0.486872	0.103565	FALSE
SPNCRNA.190	MMS0.0075-40h	0.992201	-0.0112955	1.03553	0.0503697	1.01623	0.0232309	1.05424	0.0761986	52	0.744635	0.864958	0.0630052	0.145508	FALSE
SPNCRNA.190	Rap100ng-40h	1.02739	0.0389813	1.07225	0.100646	1.04491	0.0633833	1.08399	0.116351	42	0.230257	0.5357	0.271078	0.120618	FALSE
SPNCRNA.190	SDS0.001-40h	0.938473	-0.0916121	0.979456	-0.029947	0.968608	-0.0460155	1.00483	0.00695229	54	0.0103797	0.0311391	1.50669	0.145631	FALSE
SPNCRNA.190	SDS0.005-40h	1.00137	0.00197957	1.0451	0.0636447	1.01482	0.0212256	1.05277	0.0741934	41	0.94739	0.994663	0.00232397	0.102344	FALSE
SPNCRNA.190	Sorb1.2M-40h	0.85576	-0.224722	0.893131	-0.163057	0.936495	-0.0946567	0.971517	-0.0416889	17	0.0036797	0.0277714	1.5564	0.17867	FALSE
SPNCRNA.190	TSA500nM-40h									0					FALSE
SPNCRNA.190	Temp32C-40h	1.00543	0.00780999	1.04933	0.0694751	0.989026	-0.0159191	1.02601	0.0370486	36	0.820901	0.930807	0.0311405	0.121169	FALSE
SPNCRNA.190	Temp37C-40h	1.04919	0.0692818	1.09501	0.130947	1.01161	0.0166537	1.04944	0.0696214	29	0.0672436	0.111098	0.954294	0.125246	FALSE
SPNCRNA.190	Torin5uM-40h	0.944047	-0.0830696	0.985273	-0.0214044	0.934447	-0.0978147	0.969393	-0.044847	36	0.0462219	0.167974	0.774757	0.148186	FALSE
SPNCRNA.190	VPA3mM-40h	0.961225	-0.0570546	1.0032	0.00461056	0.958527	-0.0611095	0.994372	-0.00814179	12	0.0577576	0.16703	0.777206	0.0508159	FALSE
SPNCRNA.190	VPA5mM-40h	1.10248	0.140751	1.15062	0.202416	1.11792	0.160812	1.15972	0.21378	17	0.00109048	0.00335986	2.47368	0.10498	TRUE
SPNCRNA.194	Ant0.1ng-40h	1.05615	0.0788161	1.10213	0.140288	1.07017	0.0978445	1.0817	0.113297	12	0.0147315	0.0822601	1.08481	0.0584013	FALSE
SPNCRNA.194	Ant1ng-40h	0.981244	-0.0273163	1.02396	0.0341555	1.03699	0.0524062	1.04816	0.0678589	16	0.395779	0.557899	0.253445	0.067628	FALSE
SPNCRNA.194	Bleo20ug-40h	1.04597	0.0648348	1.0915	0.126307	1.08806	0.121759	1.09978	0.137211	12	0.0247329	0.0722963	1.14088	0.0479236	FALSE
SPNCRNA.194	Caff10mM-40h	1.08778	0.121389	1.13513	0.18286	1.12819	0.174005	1.14034	0.189458	12	6.87349e-07	3.91789e-05	4.40695	0.0264083	TRUE
SPNCRNA.194	Can60ug-40h	0.950866	-0.0726856	0.992257	-0.0112139	0.993119	-0.0099619	1.00381	0.00549082	31	0.0694444	0.138889	0.857333	0.128573	FALSE
SPNCRNA.194	CoCl0.25mM-40h	1.00834	0.0119859	1.05224	0.0734576	1.03509	0.0497581	1.04624	0.0652108	24	0.736035	0.892638	0.0493247	0.100941	FALSE
SPNCRNA.194	Diam2mM-40h	0.98079	-0.0279832	1.02348	0.0334885	1.00646	0.0092872	1.0173	0.0247399	12	0.250071	0.370235	0.431523	0.0278231	FALSE
SPNCRNA.194	EGTA10mM-40h									0					FALSE
SPNCRNA.194	EMM_Arg-40h	0.976004	-0.0350415	1.01849	0.0264302	1.01179	0.0169089	1.02268	0.0323616	4	0.65307	0.858439	0.0662906	0.0977468	FALSE
SPNCRNA.194	EMM_Cyst-40h	0.938306	-0.0918702	0.97915	-0.0303985	0.987175	-0.0186223	0.997805	-0.00316954	4	0.523281	0.73647	0.132845	0.177346	FALSE
SPNCRNA.194	EMM_Gal2-40h	0.917793	-0.123759	0.957745	-0.0622868	0.927891	-0.107973	0.937883	-0.0925203	6	0.0220839	0.0831827	1.07997	0.0656891	FALSE
SPNCRNA.194	EMM_Glu-40h	0.983412	-0.0241318	1.02622	0.03734	0.996972	-0.00437546	1.00771	0.0110773	23	0.38443	0.586961	0.231391	0.0600729	FALSE
SPNCRNA.194	EMM_Gluc2-40h	1.01617	0.0231412	1.0604	0.0846129	1.03648	0.051694	1.04764	0.0671467	12	0.495196	0.758078	0.120286	0.0658347	FALSE
SPNCRNA.194	EMM_Gluc3-40h	1.04668	0.0658184	1.09224	0.12729	1.0972	0.133824	1.10901	0.149277	16	0.397872	0.697805	0.156266	0.216294	FALSE
SPNCRNA.194	EMM_Gly3-40h	0.935276	-0.096536	0.975988	-0.0350643	0.96494	-0.0514886	0.975331	-0.0360358	4	0.00638015	0.0351165	1.45449	0.0284501	FALSE
SPNCRNA.194	EMM_NH4Cl-40h	1	0	1.04353	0.0614717	1	0	1.01077	0.0154527	84	1	1	0	0.140544	FALSE
SPNCRNA.194	EMM_Phe-40h	1.04427	0.0625012	1.08973	0.123973	1.07308	0.101755	1.08463	0.117208	12	0.208587	0.424624	0.371995	0.11019	FALSE
SPNCRNA.194	EMM_Pro-40h	1.04998	0.07036	1.09568	0.131832	1.09112	0.125814	1.10287	0.141267	12	0.00910287	0.0188678	1.72428	0.040741	FALSE
SPNCRNA.194	H2O2_0.5mM-40h	1.02134	0.030461	1.0658	0.0919327	1.05777	0.0810207	1.06916	0.0964734	12	0.199765	0.355832	0.448755	0.0272475	FALSE
SPNCRNA.194	H2O2_1mM-40h	1.04598	0.0648495	1.09151	0.126321	1.03022	0.0429501	1.04131	0.0584028	16	0.161734	0.516928	0.28657	0.117904	FALSE
SPNCRNA.194	H2O2_3mM-40h	1.05633	0.0790637	1.10231	0.140535	1.10125	0.139138	1.11311	0.154591	12	0.00439858	0.025422	1.59479	0.0431777	FALSE
SPNCRNA.194	HU10mM-40h	0.988029	-0.0173749	1.03104	0.0440968	1.03804	0.0538612	1.04922	0.0693139	36	0.663394	0.78778	0.103595	0.144639	FALSE
SPNCRNA.194	HU20mM-40h	1.01752	0.0250599	1.06181	0.0865317	1.0323	0.0458576	1.04341	0.0613103	32	0.610751	0.762305	0.117871	0.18222	FALSE
SPNCRNA.194	HU5mM-40h	0.979556	-0.0297996	1.0222	0.0316722	1.01151	0.0165167	1.02241	0.0319694	36	0.313714	0.48991	0.309884	0.086717	FALSE
SPNCRNA.194	MMS0.005-40h	0.97155	-0.0416392	1.01384	0.0198325	0.997724	-0.00328708	1.00847	0.0121656	36	0.224552	0.477985	0.320585	0.112789	FALSE
SPNCRNA.194	MMS0.0075-40h	0.971518	-0.0416874	1.01381	0.0197844	1.00706	0.0101466	1.0179	0.0255993	36	0.181491	0.465472	0.332107	0.0953336	FALSE
SPNCRNA.194	Rap100ng-40h	0.98888	-0.0161324	1.03193	0.0453393	0.984754	-0.0221641	0.995359	-0.00671141	24	0.721835	0.860323	0.0653387	0.139543	FALSE
SPNCRNA.194	SDS0.001-40h	0.946061	-0.0799955	0.987242	-0.0185238	0.971332	-0.0419635	0.981792	-0.0265108	36	0.0559552	0.109981	0.958683	0.147051	FALSE
SPNCRNA.194	SDS0.005-40h	0.993833	-0.00892403	1.03709	0.0525477	1.04742	0.0668341	1.05869	0.0822868	28	0.800413	0.944471	0.0248112	0.106762	FALSE
SPNCRNA.194	Sorb1.2M-40h	1.08527	0.118048	1.13251	0.17952	1.11444	0.156325	1.12645	0.171778	12	0.140782	0.281563	0.550424	0.188986	FALSE
SPNCRNA.194	TSA500nM-40h									0					FALSE
SPNCRNA.194	Temp32C-40h	1.01065	0.0152766	1.05464	0.0767483	1.00808	0.0116038	1.01893	0.0270565	24	0.654923	0.888068	0.0515538	0.0949816	FALSE
SPNCRNA.194	Temp37C-40h	1.08174	0.113359	1.12883	0.174831	1.04675	0.0659213	1.05803	0.081374	20	0.0169215	0.0401886	1.3959	0.134251	FALSE
SPNCRNA.194	Torin5uM-40h	1.00134	0.00193732	1.04493	0.0634091	0.961548	-0.0565697	0.971902	-0.041117	24	0.973474	0.984876	0.00661832	0.190641	FALSE
SPNCRNA.194	VPA3mM-40h	0.977507	-0.0328213	1.02006	0.0286505	1.003	0.00431813	1.0138	0.0197708	8	0.625147	0.774638	0.110901	0.123778	FALSE
SPNCRNA.194	VPA5mM-40h	1.17915	0.237752	1.23048	0.299224	1.20185	0.265261	1.2148	0.280714	12	1.57887e-06	1.38455e-05	4.85869	0.083239	TRUE
SPNCRNA.236	Ant0.1ng-40h	0.957826	-0.0621651	1.05576	0.0782862	0.987044	-0.0188133	1.09751	0.134231	36	0.0196611	0.10188	0.991911	0.0931743	FALSE
SPNCRNA.236	Ant1ng-40h	1.00712	0.0102425	1.1101	0.150694	1.01563	0.0223733	1.12929	0.175417	36	0.634743	0.744177	0.128324	0.0688559	FALSE
SPNCRNA.236	Bleo20ug-40h	0.990828	-0.0132936	1.09214	0.127158	0.989654	-0.0150037	1.10041	0.13804	20	0.663902	0.727738	0.138025	0.0885338	FALSE
SPNCRNA.236	Caff10mM-40h	1.02741	0.0390139	1.13246	0.179465	1.01367	0.0195833	1.12711	0.172627	35	0.0999497	0.242431	0.615411	0.0815968	FALSE
SPNCRNA.236	Can60ug-40h	1.10705	0.146715	1.22024	0.287167	1.11532	0.157456	1.24014	0.3105	23	0.000147896	0.000936677	3.02841	0.119064	TRUE
SPNCRNA.236	CoCl0.25mM-40h	0.998986	-0.00146401	1.10113	0.138987	0.984118	-0.0230966	1.09425	0.129947	12	0.967346	0.986821	0.00576174	0.0837031	FALSE
SPNCRNA.236	Diam2mM-40h	1.04975	0.0700469	1.15709	0.210498	1.02937	0.0417658	1.14457	0.19481	12	0.0145469	0.0450349	1.34645	0.0592176	FALSE
SPNCRNA.236	EGTA10mM-40h	1.03906	0.0552731	1.1453	0.195724	1.00079	0.00114379	1.11279	0.154188	12	0.294521	0.439198	0.35734	0.130344	FALSE
SPNCRNA.236	EMM_Arg-40h	1.02638	0.0375625	1.13133	0.178014	0.991522	-0.012284	1.10249	0.14076	24	0.386368	0.665436	0.176893	0.151322	FALSE
SPNCRNA.236	EMM_Cyst-40h	1.1368	0.184975	1.25303	0.325427	1.11497	0.157001	1.23975	0.310045	12	0.00327218	0.0196331	1.70701	0.139394	FALSE
SPNCRNA.236	EMM_Gal2-40h	0.9051	-0.143852	0.997646	-0.00340032	0.902925	-0.147321	1.00397	0.00572276	24	0.00525468	0.0296889	1.52741	0.159759	FALSE
SPNCRNA.236	EMM_Glu-40h	1.01818	0.0259884	1.12229	0.16644	1.02559	0.0364562	1.14037	0.1895	35	0.339954	0.565473	0.247588	0.101562	FALSE
SPNCRNA.236	EMM_Gluc2-40h	0.992885	-0.0103017	1.09441	0.13015	0.985895	-0.0204934	1.09623	0.132551	12	0.799712	0.959655	0.017885	0.0969067	FALSE
SPNCRNA.236	EMM_Gluc3-40h	1.00555	0.00799001	1.10837	0.148441	1.00744	0.0106928	1.12018	0.163737	12	0.870965	0.918482	0.0369296	0.121377	FALSE
SPNCRNA.236	EMM_Gly3-40h	0.974758	-0.0368838	1.07443	0.103568	0.986168	-0.0200954	1.09653	0.132949	24	0.15341	0.291478	0.535394	0.0742081	FALSE
SPNCRNA.236	EMM_NH4Cl-40h	1	0	1.10225	0.140451	1	0	1.11191	0.153044	122	1	1	0	0.130735	FALSE
SPNCRNA.236	EMM_Phe-40h	1.00058	0.000832563	1.10289	0.141284	1.00042	0.00060357	1.11238	0.153647	24	0.976819	0.994262	0.00249903	0.0895438	FALSE
SPNCRNA.236	EMM_Pro-40h	1.12298	0.167337	1.23781	0.307789	1.09551	0.131597	1.21811	0.284641	35	1.63607e-05	5.65189e-05	4.24781	0.152544	TRUE
SPNCRNA.236	H2O2_0.5mM-40h	1.00419	0.00603506	1.10687	0.146486	1.00556	0.00800239	1.1181	0.161046	36	0.861747	0.884295	0.0534029	0.141624	FALSE
SPNCRNA.236	H2O2_1mM-40h	1.01937	0.0276842	1.12361	0.168136	1.01219	0.0174768	1.12546	0.170521	24	0.396476	0.779281	0.108306	0.107317	FALSE
SPNCRNA.236	H2O2_3mM-40h	1.06852	0.0956186	1.17778	0.23607	1.05984	0.0838525	1.17845	0.236896	24	0.00573776	0.0272543	1.56456	0.111941	FALSE
SPNCRNA.236	HU10mM-40h	1.13609	0.184073	1.25225	0.324524	1.14074	0.189965	1.2684	0.343009	23	5.81385e-06	5.0983e-05	4.29257	0.120405	TRUE
SPNCRNA.236	HU20mM-40h	1.1814	0.240492	1.30219	0.380944	1.1702	0.226755	1.30116	0.379799	19	6.981e-07	2.65278e-05	4.5763	0.122024	TRUE
SPNCRNA.236	HU5mM-40h	1.07096	0.0989082	1.18047	0.239359	1.08403	0.116406	1.20535	0.26945	36	9.80952e-05	0.00095898	3.01819	0.089992	TRUE
SPNCRNA.236	MMS0.005-40h	0.99875	-0.00180442	1.10087	0.138647	0.992311	-0.0111364	1.10336	0.141908	32	0.928892	0.951503	0.0215899	0.0557906	FALSE
SPNCRNA.236	MMS0.0075-40h	1.06805	0.0949764	1.17726	0.235428	1.06315	0.0883484	1.18213	0.241392	24	0.00549135	0.0447153	1.34954	0.110254	FALSE
SPNCRNA.236	Rap100ng-40h	1.02592	0.0369201	1.13082	0.177371	0.992588	-0.0107335	1.10367	0.14231	36	0.219105	0.5357	0.271078	0.118434	FALSE
SPNCRNA.236	SDS0.001-40h	1.08962	0.123819	1.20103	0.26427	1.08779	0.121394	1.20952	0.274438	20	0.000457203	0.00299441	2.52369	0.0994663	TRUE
SPNCRNA.236	SDS0.005-40h	0.979097	-0.0304758	1.07921	0.109975	1.01935	0.0276502	1.13343	0.180694	20	0.517379	0.756169	0.121381	0.147621	FALSE
SPNCRNA.236	Sorb1.2M-40h	0.99998	-2.92443e-05	1.10223	0.140422	1.01322	0.0189463	1.12661	0.17199	12	0.999445	0.999445	0.000241156	0.101415	FALSE
SPNCRNA.236	TSA500nM-40h	0.995329	-0.00675407	1.0971	0.133697	0.978409	-0.0314904	1.08791	0.121553	24	0.846752	0.903231	0.0442012	0.115849	FALSE
SPNCRNA.236	Temp32C-40h	0.974541	-0.0372046	1.07419	0.103247	0.984918	-0.0219249	1.09514	0.131119	27	0.222627	0.54184	0.266129	0.100703	FALSE
SPNCRNA.236	Temp37C-40h	1.07122	0.0992558	1.18075	0.239707	1.06656	0.0929622	1.18592	0.246006	36	0.00134186	0.0074912	2.12545	0.120817	TRUE
SPNCRNA.236	Torin5uM-40h	0.991212	-0.0127348	1.09256	0.127717	0.979712	-0.02957	1.08935	0.123474	24	0.64123	0.81915	0.0866368	0.0829477	FALSE
SPNCRNA.236	VPA3mM-40h	1.00789	0.0113324	1.11094	0.151784	1.00381	0.00548541	1.11615	0.158529	31	0.659987	0.791985	0.101283	0.0874859	FALSE
SPNCRNA.236	VPA5mM-40h	1.0944	0.130142	1.2063	0.270593	1.08928	0.12338	1.21119	0.276424	11	3.30386e-06	2.69028e-05	4.5702	0.0456052	TRUE
SPNCRNA.239	Ant0.1ng-40h	0.910613	-0.135091	0.871548	-0.198347	0.958465	-0.0612018	0.998336	-0.00240299	36	0.0990505	0.262599	0.580707	0.252442	FALSE
SPNCRNA.239	Ant1ng-40h	0.956254	-0.0645339	0.915232	-0.127791	0.981529	-0.0268968	1.02236	0.0319021	35	0.391878	0.557899	0.253445	0.230141	FALSE
SPNCRNA.239	Bleo20ug-40h	0.956876	-0.0635966	0.915827	-0.126853	0.992794	-0.0104341	1.03409	0.0483647	20	0.523041	0.618384	0.208742	0.254104	FALSE
SPNCRNA.239	Caff10mM-40h	1.04809	0.0677665	1.00313	0.00450976	0.991723	-0.0119905	1.03298	0.0468083	36	0.364671	0.61136	0.213703	0.247072	FALSE
SPNCRNA.239	Can60ug-40h	1.04825	0.0679773	1.00328	0.00472062	1.09457	0.130368	1.14011	0.189167	24	0.51997	0.637382	0.1956	0.317134	FALSE
SPNCRNA.239	CoCl0.25mM-40h	1.00678	0.00974644	0.963589	-0.0535103	1.02751	0.0391531	1.07025	0.0979519	12	0.934094	0.982041	0.00787023	0.247396	FALSE
SPNCRNA.239	Diam2mM-40h	0.952015	-0.0709435	0.911175	-0.1342	1.0267	0.0380185	1.06941	0.0968173	12	0.608222	0.714817	0.145805	0.286022	FALSE
SPNCRNA.239	EGTA10mM-40h	0.877139	-0.189122	0.839511	-0.252379	0.836759	-0.257116	0.871567	-0.198317	12	0.334521	0.490246	0.309586	0.393025	FALSE
SPNCRNA.239	EMM_Arg-40h	0.863745	-0.211323	0.826691	-0.27458	0.837557	-0.25574	0.872398	-0.196941	24	0.094661	0.272509	0.564619	0.342127	FALSE
SPNCRNA.239	EMM_Cyst-40h	1.0957	0.131853	1.0487	0.0685964	1.18084	0.239814	1.22996	0.298613	12	0.400482	0.602682	0.219912	0.350657	FALSE
SPNCRNA.239	EMM_Gal2-40h	0.931917	-0.101727	0.891939	-0.164983	0.876166	-0.190723	0.912613	-0.131924	24	0.181817	0.342422	0.465438	0.187824	FALSE
SPNCRNA.239	EMM_Glu-40h	1.01874	0.0267857	0.975037	-0.036471	0.964607	-0.0519862	1.00473	0.00681259	36	0.674076	0.800465	0.0966578	0.185658	FALSE
SPNCRNA.239	EMM_Gluc2-40h	0.987952	-0.0174873	0.94557	-0.080744	0.987185	-0.0186078	1.02825	0.040191	12	0.891152	0.993136	0.00299143	0.26836	FALSE
SPNCRNA.239	EMM_Gluc3-40h	0.975203	-0.036225	0.933368	-0.0994817	0.961205	-0.057084	1.00119	0.00171481	12	0.69366	0.892457	0.0494129	0.179005	FALSE
SPNCRNA.239	EMM_Gly3-40h	1.00713	0.0102562	0.963929	-0.0530005	0.988077	-0.0173053	1.02918	0.0414935	22	0.899786	0.915854	0.038174	0.212516	FALSE
SPNCRNA.239	EMM_NH4Cl-40h	1	0	0.957101	-0.0632567	1	0	1.0416	0.0587988	123	1	1	0	0.323505	FALSE
SPNCRNA.239	EMM_Phe-40h	1.01246	0.017865	0.969027	-0.0453917	1.03031	0.0430776	1.07317	0.101876	24	0.863471	0.937483	0.0280366	0.305401	FALSE
SPNCRNA.239	EMM_Pro-40h	1.09342	0.128846	1.04651	0.0655897	1.04104	0.058019	1.08434	0.116818	36	0.0436031	0.0828459	1.08173	0.195432	FALSE
SPNCRNA.239	H2O2_0.5mM-40h	1.07905	0.10976	1.03276	0.0465031	1.00567	0.00816183	1.04751	0.0669607	36	0.0797061	0.227162	0.643664	0.18741	FALSE
SPNCRNA.239	H2O2_1mM-40h	1.0823	0.114105	1.03587	0.0508486	1.05335	0.07498	1.09716	0.133779	24	0.1585	0.516928	0.28657	0.227849	FALSE
SPNCRNA.239	H2O2_3mM-40h	1.11228	0.153521	1.06457	0.0902643	1.04777	0.0673254	1.09136	0.126124	24	0.0421165	0.114316	0.941892	0.207699	FALSE
SPNCRNA.239	HU10mM-40h	1.11806	0.160993	1.07009	0.0977361	1.14694	0.197784	1.19465	0.256583	24	0.15353	0.250035	0.601999	0.350378	FALSE
SPNCRNA.239	HU20mM-40h	1.114	0.155748	1.06621	0.0924912	1.12423	0.168934	1.17099	0.227733	20	0.0970541	0.170218	0.768995	0.253277	FALSE
SPNCRNA.239	HU5mM-40h	1.03841	0.0543804	0.993866	-0.00887627	1.11737	0.160107	1.16385	0.218905	35	0.557942	0.665625	0.17677	0.326103	FALSE
SPNCRNA.239	MMS0.005-40h	0.943264	-0.0842663	0.902799	-0.147523	0.989024	-0.0159224	1.03017	0.0428764	32	0.406079	0.603619	0.219237	0.327228	FALSE
SPNCRNA.239	MMS0.0075-40h	1.03634	0.0515034	0.991886	-0.0117533	1.03606	0.0511042	1.07916	0.109903	23	0.553953	0.743869	0.128504	0.241852	FALSE
SPNCRNA.239	Rap100ng-40h	0.898766	-0.153982	0.86021	-0.217239	0.935614	-0.0960151	0.974534	-0.0372163	33	0.0693553	0.317214	0.498647	0.250421	FALSE
SPNCRNA.239	SDS0.001-40h	1.09907	0.136286	1.05192	0.0730297	1.13968	0.188632	1.18709	0.247431	20	0.180378	0.257039	0.590001	0.279722	FALSE
SPNCRNA.239	SDS0.005-40h	0.956429	-0.0642706	0.915399	-0.127527	0.979703	-0.0295841	1.02046	0.0292147	19	0.55423	0.799775	0.097032	0.275488	FALSE
SPNCRNA.239	Sorb1.2M-40h	0.984762	-0.0221531	0.942517	-0.0854098	1.04283	0.0605081	1.08621	0.119307	11	0.909405	0.933983	0.029661	0.404157	FALSE
SPNCRNA.239	TSA500nM-40h	0.906835	-0.141088	0.867933	-0.204345	0.866739	-0.20633	0.902794	-0.147531	24	0.119522	0.24779	0.605917	0.234833	FALSE
SPNCRNA.239	Temp32C-40h	0.991338	-0.0125508	0.948811	-0.0758075	0.906842	-0.141077	0.944565	-0.0822779	27	0.851364	0.931434	0.0308477	0.171767	FALSE
SPNCRNA.239	Temp37C-40h	1.05792	0.0812271	1.01253	0.0179704	0.961082	-0.0572688	1.00106	0.00153004	34	0.227124	0.28569	0.544104	0.204065	FALSE
SPNCRNA.239	Torin5uM-40h	1.0212	0.0302601	0.977388	-0.0329966	1.02732	0.0388894	1.07006	0.0976882	23	0.712806	0.864467	0.0632517	0.222145	FALSE
SPNCRNA.239	VPA3mM-40h	0.977895	-0.0322485	0.935944	-0.0955052	1.02351	0.0335265	1.06609	0.0923253	31	0.785613	0.861153	0.0649198	0.398358	FALSE
SPNCRNA.239	VPA5mM-40h	1.20764	0.272189	1.15583	0.208932	1.22052	0.287493	1.27129	0.346292	11	0.0223573	0.0447146	1.34955	0.236783	FALSE
SPNCRNA.242	Ant0.1ng-40h	1.02998	0.0426151	1.06461	0.0903252	1.00757	0.0108823	1.05317	0.0747381	70	0.0230839	0.11331	0.945732	0.0700396	FALSE
SPNCRNA.242	Ant1ng-40h	1.03793	0.0537036	1.07282	0.101414	1.03276	0.0465058	1.0795	0.110362	69	0.0197772	0.0806082	1.09362	0.106325	FALSE
SPNCRNA.242	Bleo20ug-40h	1.04571	0.0644788	1.08087	0.112189	1.06897	0.0962195	1.11735	0.160075	40	0.0375648	0.0982099	1.00784	0.123501	FALSE
SPNCRNA.242	Caff10mM-40h	1.06109	0.085551	1.09677	0.133261	1.04579	0.0645937	1.09312	0.128449	72	5.82646e-05	0.00110703	2.95584	0.0941225	FALSE
SPNCRNA.242	Can60ug-40h	1.05843	0.0819221	1.09401	0.129632	1.02247	0.0320571	1.06874	0.0959129	47	0.0224439	0.0568579	1.24521	0.16132	FALSE
SPNCRNA.242	CoCl0.25mM-40h	1.03387	0.0480585	1.06863	0.0957686	1.05407	0.0759651	1.10177	0.139821	24	0.191597	0.474046	0.32418	0.117545	FALSE
SPNCRNA.242	Diam2mM-40h	1.04565	0.0643968	1.08081	0.112107	1.0417	0.058934	1.08884	0.12279	24	0.00240051	0.0130882	1.88312	0.0521671	FALSE
SPNCRNA.242	EGTA10mM-40h	0.920954	-0.118799	0.95192	-0.0710885	0.931228	-0.102793	0.973372	-0.0389371	23	0.110801	0.192388	0.715822	0.231139	FALSE
SPNCRNA.242	EMM_Arg-40h	0.960545	-0.0580748	0.992841	-0.0103647	0.900776	-0.150759	0.941542	-0.0869032	48	0.132972	0.358375	0.445663	0.170382	FALSE
SPNCRNA.242	EMM_Cyst-40h	1.10362	0.142245	1.14073	0.189955	1.10151	0.139489	1.15136	0.203344	24	5.08335e-06	0.000135593	3.86776	0.0859491	TRUE
SPNCRNA.242	EMM_Gal2-40h	0.977111	-0.0334059	1.00996	0.0143042	0.966868	-0.0486089	1.01062	0.0152468	48	0.224033	0.395558	0.40279	0.11167	FALSE
SPNCRNA.242	EMM_Glu-40h	1.01321	0.0189333	1.04728	0.0666434	1.00467	0.0067253	1.05014	0.0705811	72	0.357141	0.565473	0.247588	0.0870128	FALSE
SPNCRNA.242	EMM_Gluc2-40h	1.00073	0.0010514	1.03438	0.0487615	1.02926	0.0416122	1.07584	0.105468	24	0.975712	0.993136	0.00299143	0.108446	FALSE
SPNCRNA.242	EMM_Gluc3-40h	1.04466	0.0630379	1.07979	0.110748	1.02305	0.0328786	1.06935	0.0967344	24	0.0236018	0.185056	0.732696	0.0811695	FALSE
SPNCRNA.242	EMM_Gly3-40h	1.00505	0.00727404	1.03885	0.0549842	1.03947	0.0558502	1.08651	0.119706	47	0.816026	0.860836	0.0650798	0.134858	FALSE
SPNCRNA.242	EMM_NH4Cl-40h	1	0	1.03362	0.0477101	1	0	1.04526	0.0638558	248	1	1	0	0.168024	FALSE
SPNCRNA.242	EMM_Phe-40h	1.04294	0.0606593	1.07801	0.108369	1.02748	0.0391038	1.07397	0.10296	48	0.007175	0.0351415	1.45418	0.0849142	FALSE
SPNCRNA.242	EMM_Pro-40h	1.13459	0.182175	1.17274	0.229885	1.11028	0.150928	1.16053	0.214784	72	5.99283e-11	6.83183e-09	8.16546	0.139274	TRUE
SPNCRNA.242	H2O2_0.5mM-40h	1.05473	0.0768799	1.0902	0.12459	1.02275	0.0324539	1.06904	0.0963097	72	0.00581686	0.0510094	1.29235	0.145316	FALSE
SPNCRNA.242	H2O2_1mM-40h	1.07485	0.104141	1.11099	0.151851	1.0751	0.104473	1.12376	0.168329	48	0.00355688	0.202742	0.693056	0.161385	FALSE
SPNCRNA.242	H2O2_3mM-40h	1.10977	0.150257	1.14708	0.197967	1.08861	0.122485	1.13787	0.186341	48	1.42619e-08	1.62585e-06	5.78892	0.103853	TRUE
SPNCRNA.242	HU10mM-40h	1.16177	0.216321	1.20083	0.264031	1.13588	0.183816	1.18729	0.247671	48	1.24513e-09	8.39184e-08	7.07614	0.148881	TRUE
SPNCRNA.242	HU20mM-40h	1.11368	0.155339	1.15113	0.203049	1.13788	0.186343	1.18937	0.250198	40	3.51062e-05	0.000444679	3.35195	0.150788	TRUE
SPNCRNA.242	HU5mM-40h	1.07179	0.100024	1.10783	0.147734	1.03299	0.0468229	1.07974	0.110679	72	2.11687e-05	0.000245526	3.6099	0.111987	FALSE
SPNCRNA.242	MMS0.005-40h	1.01695	0.024246	1.05114	0.0719562	1.01227	0.0176005	1.05809	0.0814562	64	0.248247	0.487934	0.311639	0.0857937	FALSE
SPNCRNA.242	MMS0.0075-40h	1.03811	0.0539656	1.07302	0.101676	1.02657	0.037837	1.07303	0.101693	48	0.0400199	0.182491	0.738759	0.108305	FALSE
SPNCRNA.242	Rap100ng-40h	1.00644	0.00926166	1.04028	0.0569718	0.997333	-0.00385214	1.04247	0.0600036	69	0.769106	0.876525	0.0572359	0.165696	FALSE
SPNCRNA.242	SDS0.001-40h	1.09239	0.127494	1.12912	0.175204	1.07742	0.107574	1.12617	0.17143	40	3.04161e-06	6.93487e-05	4.15896	0.0995998	TRUE
SPNCRNA.242	SDS0.005-40h	1.01467	0.0210065	1.04878	0.0687166	1.01228	0.0176102	1.05809	0.081466	40	0.459407	0.701045	0.154254	0.109836	FALSE
SPNCRNA.242	Sorb1.2M-40h	1.04358	0.0615457	1.07867	0.109256	1.02643	0.0376321	1.07288	0.101488	24	0.0184718	0.077992	1.10795	0.0740467	FALSE
SPNCRNA.242	TSA500nM-40h	1.02674	0.0380756	1.06127	0.0857857	0.998721	-0.00184708	1.04392	0.0620087	48	0.17595	0.332351	0.478403	0.119327	FALSE
SPNCRNA.242	Temp32C-40h	0.988407	-0.0168231	1.02164	0.030887	0.998949	-0.00151668	1.04416	0.0623391	56	0.479588	0.790347	0.102182	0.0981157	FALSE
SPNCRNA.242	Temp37C-40h	1.06525	0.0911947	1.10107	0.138905	1.06392	0.089394	1.11207	0.15325	72	4.12304e-05	0.00104625	2.98036	0.101957	TRUE
SPNCRNA.242	Torin5uM-40h	1.01271	0.0182167	1.04676	0.0659268	1.01026	0.0147237	1.05598	0.0785794	48	0.521105	0.742574	0.12926	0.120352	FALSE
SPNCRNA.242	VPA3mM-40h	1.02394	0.0341379	1.05837	0.081848	1.02879	0.0409542	1.07535	0.10481	63	0.339804	0.503087	0.298357	0.186358	FALSE
SPNCRNA.242	VPA5mM-40h	1.13389	0.181275	1.17201	0.228985	1.13083	0.177381	1.18201	0.241237	23	1.13043e-07	1.84099e-06	5.73495	0.088615	TRUE
SPNCRNA.248	Ant0.1ng-40h	0.987633	-0.0179527	1.01173	0.0168217	1.02079	0.0296817	1.04097	0.0579255	36	0.626656	0.79267	0.100908	0.132505	FALSE
SPNCRNA.248	Ant1ng-40h	0.979089	-0.0304883	1.00298	0.00428606	0.987278	-0.0184713	1.0068	0.00977258	36	0.315092	0.493648	0.306582	0.0977714	FALSE
SPNCRNA.248	Bleo20ug-40h	1.07438	0.103508	1.10059	0.138282	1.08322	0.115331	1.10464	0.143575	20	0.0015739	0.00941957	2.02597	0.0809414	TRUE
SPNCRNA.248	Caff10mM-40h	0.990927	-0.0131498	1.0151	0.0216245	0.969865	-0.0441446	0.989039	-0.0159008	36	0.704915	0.864089	0.0634416	0.122003	FALSE
SPNCRNA.248	Can60ug-40h	1.03616	0.0512527	1.06144	0.0860271	1.04627	0.0652613	1.06696	0.0935051	24	0.278778	0.373891	0.427255	0.150782	FALSE
SPNCRNA.248	CoCl0.25mM-40h	1.08191	0.113576	1.1083	0.14835	1.09089	0.125503	1.11246	0.153747	12	0.00131307	0.0299379	1.52378	0.0650951	FALSE
SPNCRNA.248	Diam2mM-40h	1.03791	0.0536776	1.06323	0.088452	1.02127	0.0303664	1.04146	0.0586102	12	0.176725	0.2768	0.557834	0.0835455	FALSE
SPNCRNA.248	EGTA10mM-40h	1.0287	0.0408257	1.0538	0.0756001	1.04786	0.0674406	1.06857	0.0956844	12	0.416168	0.570553	0.243704	0.112413	FALSE
SPNCRNA.248	EMM_Arg-40h	0.894915	-0.160178	0.916748	-0.125403	0.895739	-0.158849	0.913448	-0.130605	24	0.00404796	0.0174798	1.75746	0.1567	FALSE
SPNCRNA.248	EMM_Cyst-40h	1.0956	0.131721	1.12233	0.166496	1.121	0.164792	1.14317	0.193036	12	0.00647186	0.0351329	1.45429	0.0982671	FALSE
SPNCRNA.248	EMM_Gal2-40h	1.0076	0.010924	1.03218	0.0456984	1.01011	0.0145192	1.03008	0.042763	24	0.729564	0.83448	0.0785843	0.0873657	FALSE
SPNCRNA.248	EMM_Glu-40h	1.05002	0.070418	1.07564	0.105192	1.06562	0.0916934	1.08669	0.119937	36	0.0731915	0.347659	0.458846	0.14753	FALSE
SPNCRNA.248	EMM_Gluc2-40h	1.0103	0.0147826	1.03495	0.049557	1.0207	0.0295595	1.04088	0.0578033	12	0.66736	0.864535	0.0632175	0.0695615	FALSE
SPNCRNA.248	EMM_Gluc3-40h	0.975331	-0.0360367	0.999125	-0.00126236	0.975159	-0.036291	0.994438	-0.00804714	12	0.317997	0.65912	0.181035	0.0716567	FALSE
SPNCRNA.248	EMM_Gly3-40h	0.981812	-0.0264815	1.00576	0.00829287	0.98945	-0.0153006	1.00901	0.0129433	24	0.281225	0.390971	0.407856	0.0518362	FALSE
SPNCRNA.248	EMM_NH4Cl-40h	1	0	1.0244	0.0347743	1	0	1.01977	0.0282438	124	1	1	0	0.151045	FALSE
SPNCRNA.248	EMM_Phe-40h	0.98862	-0.0165114	1.01274	0.0182629	1.01841	0.0263205	1.03855	0.0545644	24	0.699207	0.851037	0.0700514	0.130699	FALSE
SPNCRNA.248	EMM_Pro-40h	1.15165	0.203709	1.17975	0.238483	1.12271	0.166986	1.14491	0.19523	36	0.000114733	0.000284338	3.54617	0.205738	TRUE
SPNCRNA.248	H2O2_0.5mM-40h	1.00739	0.0106183	1.03196	0.0453926	0.982334	-0.0257149	1.00175	0.00252894	36	0.805484	0.854111	0.0684854	0.164425	FALSE
SPNCRNA.248	H2O2_1mM-40h	1.00647	0.00930334	1.03102	0.0440777	1.01827	0.026118	1.0384	0.0543619	24	0.814605	0.908971	0.0414502	0.120389	FALSE
SPNCRNA.248	H2O2_3mM-40h	1.03547	0.0502881	1.06073	0.0850624	1.03814	0.0540042	1.05867	0.082248	23	0.307991	0.470115	0.327796	0.154963	FALSE
SPNCRNA.248	HU10mM-40h	1.05105	0.0718251	1.07669	0.106599	1.06558	0.0916322	1.08664	0.119876	24	0.0900278	0.16246	0.789253	0.13116	FALSE
SPNCRNA.248	HU20mM-40h	1.10969	0.150155	1.13676	0.184929	1.12271	0.16699	1.14491	0.195233	20	0.0050633	0.0164919	1.78273	0.152136	FALSE
SPNCRNA.248	HU5mM-40h	1.0406	0.0574181	1.06599	0.0921924	1.05541	0.0778013	1.07627	0.106045	36	0.0819269	0.233492	0.631728	0.115726	FALSE
SPNCRNA.248	MMS0.005-40h	0.956193	-0.0646256	0.979521	-0.0298512	0.980656	-0.028181	1.00004	6.28308e-05	32	0.0990905	0.326543	0.48606	0.130391	FALSE
SPNCRNA.248	MMS0.0075-40h	0.980759	-0.0280301	1.00469	0.00674422	1.00751	0.0107981	1.02743	0.039042	23	0.608505	0.762304	0.117872	0.170549	FALSE
SPNCRNA.248	Rap100ng-40h	0.96694	-0.0485019	0.99053	-0.0137276	0.959615	-0.0594725	0.978587	-0.0312287	36	0.201257	0.521439	0.282796	0.134651	FALSE
SPNCRNA.248	SDS0.001-40h	1.07396	0.102937	1.10016	0.137711	1.12777	0.173472	1.15007	0.201715	20	0.0304612	0.0667804	1.17535	0.135449	FALSE
SPNCRNA.248	SDS0.005-40h	1.01784	0.0255087	1.04267	0.060283	1.09756	0.1343	1.11926	0.162544	19	0.6066	0.807777	0.0927083	0.14081	FALSE
SPNCRNA.248	Sorb1.2M-40h	1.02778	0.0395276	1.05285	0.0743019	1.03503	0.0496705	1.05549	0.0779144	12	0.294282	0.465946	0.331665	0.078544	FALSE
SPNCRNA.248	TSA500nM-40h	0.938046	-0.0922698	0.960931	-0.0574954	0.921178	-0.118447	0.93939	-0.0902035	23	0.00196632	0.0104461	1.98105	0.0686699	FALSE
SPNCRNA.248	Temp32C-40h	0.994125	-0.00850111	1.01838	0.0262732	1.04588	0.0647109	1.06655	0.0929547	28	0.833955	0.931434	0.0308477	0.132879	FALSE
SPNCRNA.248	Temp37C-40h	1.09197	0.126931	1.11861	0.161705	1.10235	0.140581	1.12414	0.168824	36	0.0019702	0.00898413	2.04652	0.153886	TRUE
SPNCRNA.248	Torin5uM-40h	0.987249	-0.0185145	1.01133	0.0162598	1.01901	0.0271656	1.03915	0.0554094	24	0.619177	0.811336	0.0907994	0.109168	FALSE
SPNCRNA.248	VPA3mM-40h	1.01951	0.0278731	1.04438	0.0626474	1.01728	0.0247101	1.03739	0.052954	31	0.338338	0.503087	0.298357	0.0874124	FALSE
SPNCRNA.248	VPA5mM-40h	1.1	0.137498	1.12683	0.172272	1.11106	0.151935	1.13302	0.180179	12	0.00582792	0.0127766	1.89358	0.10143	FALSE
SPNCRNA.256	Ant0.1ng-40h	0.947874	-0.0772331	1.01717	0.0245652	0.990957	-0.0131055	1.05446	0.0765087	36	0.0134561	0.0822601	1.08481	0.108644	FALSE
SPNCRNA.256	Ant1ng-40h	0.946276	-0.0796674	1.01546	0.0221309	0.955803	-0.0652141	1.01706	0.0244001	36	0.00975866	0.0505676	1.29613	0.106107	FALSE
SPNCRNA.256	Bleo20ug-40h	1.04414	0.0623209	1.12048	0.164119	1.03717	0.0526473	1.10363	0.142261	20	0.0199875	0.0651022	1.1864	0.0677158	FALSE
SPNCRNA.256	Caff10mM-40h	1.01333	0.0191111	1.08742	0.120909	1.04629	0.065276	1.11334	0.15489	35	0.535103	0.772174	0.112285	0.113362	FALSE
SPNCRNA.256	Can60ug-40h	1.06725	0.0938962	1.14528	0.195695	1.05086	0.0715656	1.1182	0.16118	24	0.0050786	0.0192987	1.71447	0.102264	FALSE
SPNCRNA.256	CoCl0.25mM-40h	0.966752	-0.0487816	1.03743	0.0530167	0.98611	-0.0201799	1.04931	0.0694342	12	0.17514	0.462238	0.335134	0.0761144	FALSE
SPNCRNA.256	Diam2mM-40h	1.00485	0.00697836	1.07831	0.108777	1.04127	0.058351	1.10801	0.147965	12	0.830543	0.876684	0.0571568	0.0707246	FALSE
SPNCRNA.256	EGTA10mM-40h	1.02923	0.0415587	1.10447	0.143357	1.07762	0.107842	1.14667	0.197456	12	0.37651	0.542429	0.265657	0.110792	FALSE
SPNCRNA.256	EMM_Arg-40h	0.83833	-0.25441	0.89962	-0.152612	0.842755	-0.246815	0.896763	-0.157201	24	9.97442e-06	0.000157928	3.80154	0.149423	TRUE
SPNCRNA.256	EMM_Cyst-40h	1.05817	0.0815766	1.13554	0.183375	1.04797	0.0675916	1.11513	0.157206	12	0.0876408	0.263136	0.57982	0.10981	FALSE
SPNCRNA.256	EMM_Gal2-40h	0.959858	-0.0591071	1.03003	0.0426912	0.981784	-0.0265217	1.0447	0.0630924	24	0.0546619	0.140382	0.85269	0.0875505	FALSE
SPNCRNA.256	EMM_Glu-40h	0.969517	-0.0446617	1.0404	0.0571366	0.995532	-0.00646108	1.05933	0.0831531	36	0.110966	0.403893	0.393734	0.0953851	FALSE
SPNCRNA.256	EMM_Gluc2-40h	0.94859	-0.0761436	1.01794	0.0256546	0.936257	-0.0950241	0.996257	-0.00540995	12	0.0341243	0.185246	0.73225	0.0718867	FALSE
SPNCRNA.256	EMM_Gluc3-40h	1.06444	0.0900937	1.14226	0.191892	1.07941	0.110244	1.14859	0.199858	12	0.00563086	0.0797124	1.09847	0.0650177	FALSE
SPNCRNA.256	EMM_Gly3-40h	0.950434	-0.0733423	1.01992	0.028456	0.980298	-0.0287076	1.04312	0.0609066	22	0.0524515	0.145841	0.836121	0.109184	FALSE
SPNCRNA.256	EMM_NH4Cl-40h	1	0	1.07311	0.101798	1	0	1.06409	0.0896142	124	1	1	0	0.140684	FALSE
SPNCRNA.256	EMM_Phe-40h	0.998745	-0.00181157	1.07176	0.0999867	1.01886	0.0269535	1.08415	0.116568	24	0.968247	0.994262	0.00249903	0.152303	FALSE
SPNCRNA.256	EMM_Pro-40h	1.10207	0.140219	1.18265	0.242017	1.12501	0.169936	1.19711	0.259551	36	2.69979e-05	8.31828e-05	4.07997	0.123869	TRUE
SPNCRNA.256	H2O2_0.5mM-40h	1.02026	0.0289342	1.09485	0.130733	0.990022	-0.0144676	1.05347	0.0751466	36	0.491473	0.683267	0.165409	0.172239	FALSE
SPNCRNA.256	H2O2_1mM-40h	1.03284	0.0466169	1.10835	0.148415	1.00557	0.00801638	1.07001	0.0976305	24	0.411272	0.781709	0.106955	0.197471	FALSE
SPNCRNA.256	H2O2_3mM-40h	1.05584	0.0783845	1.13303	0.180183	1.03673	0.0520376	1.10317	0.141652	24	0.0561196	0.145401	0.837433	0.134808	FALSE
SPNCRNA.256	HU10mM-40h	1.07747	0.107642	1.15624	0.20944	1.10137	0.139304	1.17196	0.228918	24	0.00261027	0.00763003	2.11747	0.110453	TRUE
SPNCRNA.256	HU20mM-40h	1.05975	0.0837174	1.13722	0.185516	1.07934	0.110152	1.14851	0.199766	20	0.0148363	0.0384394	1.41522	0.0963009	FALSE
SPNCRNA.256	HU5mM-40h	0.958828	-0.0606565	1.02893	0.0411418	0.960352	-0.058365	1.0219	0.0312492	36	0.0905516	0.240067	0.619668	0.134137	FALSE
SPNCRNA.256	MMS0.005-40h	0.941728	-0.0866179	1.01058	0.0151804	0.952641	-0.0699948	1.01369	0.0196194	32	0.00160637	0.0457815	1.33931	0.0816316	FALSE
SPNCRNA.256	MMS0.0075-40h	0.930447	-0.104004	0.998472	-0.00220578	0.930204	-0.104381	0.989817	-0.0147667	23	0.0165206	0.0991238	1.00382	0.12802	FALSE
SPNCRNA.256	Rap100ng-40h	1.01417	0.0202999	1.08832	0.122098	0.985667	-0.0208271	1.04883	0.068787	36	0.593094	0.779214	0.108343	0.151854	FALSE
SPNCRNA.256	SDS0.001-40h	1.07192	0.100192	1.15028	0.20199	1.04712	0.0664249	1.11422	0.156039	20	0.0174735	0.0447488	1.34922	0.124228	FALSE
SPNCRNA.256	SDS0.005-40h	1.03376	0.0478995	1.10934	0.149698	1.01965	0.0280783	1.085	0.117693	19	0.101553	0.296847	0.527468	0.0764501	FALSE
SPNCRNA.256	Sorb1.2M-40h	0.955942	-0.0650057	1.02583	0.0367925	0.950683	-0.0729638	1.01161	0.0166503	12	0.0381807	0.118852	0.924994	0.0606662	FALSE
SPNCRNA.256	TSA500nM-40h	0.979644	-0.0296703	1.05127	0.072128	0.986228	-0.020007	1.04943	0.0696071	24	0.280862	0.459101	0.338092	0.0763897	FALSE
SPNCRNA.256	Temp32C-40h	0.963059	-0.0543045	1.03347	0.0474937	0.996854	-0.00454517	1.06074	0.085069	28	0.17005	0.484641	0.31458	0.134532	FALSE
SPNCRNA.256	Temp37C-40h	1.00518	0.00744776	1.07866	0.109246	1.01619	0.0231677	1.08131	0.112782	36	0.801764	0.823433	0.0843717	0.108369	FALSE
SPNCRNA.256	Torin5uM-40h	1.01812	0.0259095	1.09256	0.127708	1.03137	0.0445594	1.09746	0.134174	24	0.255193	0.478038	0.320538	0.055588	FALSE
SPNCRNA.256	VPA3mM-40h	0.972858	-0.0396985	1.04398	0.0620998	0.999284	-0.00103389	1.06332	0.0885803	30	0.206793	0.380232	0.419951	0.104035	FALSE
SPNCRNA.256	VPA5mM-40h	1.1259	0.171073	1.20821	0.272872	1.14892	0.200275	1.22255	0.289889	12	4.04072e-07	4.60642e-06	5.33664	0.0559389	TRUE
SPNCRNA.26	Ant0.1ng-40h	1.00442	0.00636058	1.05606	0.0786965	1.00303	0.00435854	1.05824	0.0816679	35	0.839219	0.928845	0.0320568	0.120552	FALSE
SPNCRNA.26	Ant1ng-40h	0.97983	-0.0293966	1.03021	0.0429393	0.97897	-0.0306635	1.03286	0.0466458	52	0.389047	0.557899	0.253445	0.160461	FALSE
SPNCRNA.26	Bleo20ug-40h	0.975209	-0.0362162	1.02535	0.0361197	0.966027	-0.0498642	1.01921	0.0274452	36	0.197328	0.303991	0.517139	0.103265	FALSE
SPNCRNA.26	Caff10mM-40h	1.0121	0.0173486	1.06414	0.0896845	1.05772	0.0809591	1.11595	0.158268	47	0.603372	0.818862	0.0867892	0.151723	FALSE
SPNCRNA.26	Can60ug-40h	1.05172	0.0727452	1.10579	0.145081	1.07926	0.110038	1.13867	0.187347	56	0.0069104	0.0231702	1.63507	0.126234	FALSE
SPNCRNA.26	CoCl0.25mM-40h	0.99669	-0.00478336	1.04794	0.0675526	0.963336	-0.0538889	1.01637	0.0234204	36	0.886475	0.969219	0.0135782	0.132063	FALSE
SPNCRNA.26	Diam2mM-40h	0.975592	-0.0356501	1.02575	0.0366858	0.995104	-0.00708009	1.04988	0.0702293	24	0.297179	0.414824	0.382136	0.107721	FALSE
SPNCRNA.26	EGTA10mM-40h	0.823119	-0.280828	0.865442	-0.208492	0.837881	-0.255183	0.884005	-0.177874	12	0.000595862	0.00389602	2.40938	0.136982	TRUE
SPNCRNA.26	EMM_Arg-40h	1.17887	0.2374	1.23948	0.309736	1.17604	0.233933	1.24078	0.311242	4	1.18659e-08	1.12727e-06	5.94797	0.0199326	TRUE
SPNCRNA.26	EMM_Cyst-40h	1.08451	0.117043	1.14027	0.189379	1.05333	0.0749565	1.11131	0.152266	16	0.0255708	0.116603	0.933291	0.139938	FALSE
SPNCRNA.26	EMM_Gal2-40h	0.96744	-0.0477559	1.01718	0.02458	0.989502	-0.015226	1.04397	0.0620834	36	0.141029	0.303863	0.517322	0.123139	FALSE
SPNCRNA.26	EMM_Glu-40h	1.00676	0.00972392	1.05853	0.0820599	0.988919	-0.0160752	1.04336	0.0612342	60	0.647397	0.796105	0.0990294	0.0906135	FALSE
SPNCRNA.26	EMM_Gluc2-40h	0.998418	-0.00228456	1.04975	0.0700514	0.932314	-0.101112	0.983637	-0.0238026	20	0.961829	0.993136	0.00299143	0.146849	FALSE
SPNCRNA.26	EMM_Gluc3-40h	1.02218	0.0316553	1.07474	0.103991	0.979158	-0.0303868	1.03306	0.0469225	32	0.426326	0.71371	0.146478	0.153724	FALSE
SPNCRNA.26	EMM_Gly3-40h	0.897084	-0.156685	0.94321	-0.0843493	0.913668	-0.130258	0.963964	-0.0529484	16	0.00923045	0.0448185	1.34854	0.142286	FALSE
SPNCRNA.26	EMM_NH4Cl-40h	1	0	1.05142	0.0723359	1	0	1.05505	0.0773093	212	1	1	0	0.148424	FALSE
SPNCRNA.26	EMM_Phe-40h	0.984314	-0.02281	1.03492	0.0495259	1.00755	0.0108523	1.06301	0.0881617	40	0.545246	0.739976	0.130782	0.158732	FALSE
SPNCRNA.26	EMM_Pro-40h	1.02238	0.0319345	1.07495	0.10427	1.02292	0.0326976	1.07923	0.110007	28	0.415046	0.527273	0.277965	0.141023	FALSE
SPNCRNA.26	H2O2_0.5mM-40h	1.02705	0.0385113	1.07986	0.110847	1.00823	0.011821	1.06373	0.0891304	40	0.114494	0.261046	0.583283	0.0925296	FALSE
SPNCRNA.26	H2O2_1mM-40h	0.99657	-0.00495662	1.04781	0.0673793	0.98126	-0.0272933	1.03528	0.0500161	39	0.818146	0.908971	0.0414502	0.0741093	FALSE
SPNCRNA.26	H2O2_3mM-40h	1.05598	0.0785761	1.11027	0.150912	1.054	0.0758726	1.11202	0.153182	28	0.0046393	0.025422	1.59479	0.0900461	FALSE
SPNCRNA.26	HU10mM-40h	1.10737	0.147132	1.1643	0.219468	1.06757	0.0943354	1.12634	0.171645	72	2.6404e-06	3.01006e-05	4.52142	0.172756	TRUE
SPNCRNA.26	HU20mM-40h	1.04578	0.0645839	1.09956	0.13692	1.02426	0.0345845	1.08065	0.111894	64	0.0363691	0.078228	1.10664	0.162108	FALSE
SPNCRNA.26	HU5mM-40h	0.978951	-0.0306909	1.02929	0.0416451	0.969215	-0.0451115	1.02257	0.0321978	72	0.160849	0.333396	0.477039	0.101515	FALSE
SPNCRNA.26	MMS0.005-40h	0.971892	-0.0411324	1.02186	0.0312035	0.984755	-0.0221637	1.03896	0.0551456	72	0.0313087	0.209952	0.677879	0.0769538	FALSE
SPNCRNA.26	MMS0.0075-40h	0.931858	-0.101818	0.979772	-0.029482	0.947928	-0.0771503	1.00011	0.000159006	72	6.3656e-05	0.00145136	2.83823	0.119788	TRUE
SPNCRNA.26	Rap100ng-40h	1.00097	0.00140022	1.05244	0.0737362	0.996977	-0.00436724	1.05186	0.0729421	47	0.95782	0.989853	0.00442919	0.111927	FALSE
SPNCRNA.26	SDS0.001-40h	1.01497	0.0214322	1.06715	0.0937682	1.01555	0.022266	1.07146	0.0995753	71	0.295563	0.381293	0.418741	0.0927618	FALSE
SPNCRNA.26	SDS0.005-40h	1.01573	0.0225224	1.06796	0.0948583	1.02403	0.0342512	1.0804	0.111561	64	0.263253	0.535908	0.27091	0.0851969	FALSE
SPNCRNA.26	Sorb1.2M-40h	0.750151	-0.414748	0.788722	-0.342412	0.873872	-0.194507	0.921977	-0.117197	16	0.0148818	0.0682444	1.16593	0.381007	FALSE
SPNCRNA.26	TSA500nM-40h	0.929757	-0.105074	0.977563	-0.0327384	0.928832	-0.106511	0.979963	-0.0292012	22	0.014482	0.0470669	1.32728	0.123869	FALSE
SPNCRNA.26	Temp32C-40h	0.970589	-0.0430675	1.02049	0.0292684	0.954043	-0.0678741	1.00656	0.00943522	60	0.0554481	0.346166	0.460716	0.095699	FALSE
SPNCRNA.26	Temp37C-40h	1.02201	0.0314153	1.07456	0.103751	0.983146	-0.0245223	1.03727	0.0527871	43	0.281268	0.348527	0.457763	0.122748	FALSE
SPNCRNA.26	Torin5uM-40h	1.02319	0.0330751	1.0758	0.105411	1.03017	0.0428778	1.08688	0.120187	60	0.180191	0.395033	0.403366	0.115736	FALSE
SPNCRNA.26	VPA3mM-40h	1.00703	0.0101093	1.05881	0.0824452	1.01717	0.0245645	1.07317	0.101874	56	0.669113	0.794572	0.0998669	0.104207	FALSE
SPNCRNA.26	VPA5mM-40h	1.0166	0.0237508	1.06887	0.0960867	1.00205	0.00295473	1.05721	0.0802641	47	0.568497	0.654633	0.184002	0.196564	FALSE
SPNCRNA.282	Ant0.1ng-40h	0.934905	-0.0971086	1.01554	0.022241	1.02589	0.0368704	1.0658	0.0919377	12	0.095345	0.262599	0.580707	0.121128	FALSE
SPNCRNA.282	Ant1ng-40h	0.956831	-0.0636632	1.03935	0.0556864	0.986106	-0.0201849	1.02447	0.0348823	16	0.107932	0.240792	0.618357	0.0818453	FALSE
SPNCRNA.282	Bleo20ug-40h	1.01314	0.018836	1.10052	0.138186	1.0374	0.0529676	1.07776	0.108035	12	0.620402	0.69339	0.159022	0.0706166	FALSE
SPNCRNA.282	Caff10mM-40h	0.976198	-0.0347547	1.06039	0.0845949	1.04926	0.0693716	1.09008	0.124439	12	0.426064	0.683532	0.165241	0.0864827	FALSE
SPNCRNA.282	Can60ug-40h	0.947512	-0.0777843	1.02923	0.0415653	0.968961	-0.0454893	1.00666	0.0095779	32	0.0856636	0.162761	0.78845	0.146206	FALSE
SPNCRNA.282	CoCl0.25mM-40h	0.988054	-0.0173378	1.07327	0.102012	1.05332	0.0749483	1.09431	0.130016	23	0.665377	0.862331	0.0643258	0.106153	FALSE
SPNCRNA.282	Diam2mM-40h	0.950792	-0.0727979	1.03279	0.0465517	0.999332	-0.000963716	1.03821	0.0541035	12	0.0403035	0.0957208	1.01899	0.0544181	FALSE
SPNCRNA.282	EGTA10mM-40h									0					FALSE
SPNCRNA.282	EMM_Arg-40h	1.0394	0.0557444	1.12904	0.175094	1.11701	0.159641	1.16047	0.214708	4	0.594283	0.832753	0.079484	0.140779	FALSE
SPNCRNA.282	EMM_Cyst-40h	0.900779	-0.150755	0.978467	-0.0314052	0.964594	-0.0520067	1.00212	0.00306052	4	0.052996	0.193465	0.713397	0.0751026	FALSE
SPNCRNA.282	EMM_Gal2-40h	0.942974	-0.0847095	1.0243	0.0346401	1.01362	0.0195197	1.05306	0.074587	12	0.0236482	0.0835077	1.07827	0.0601286	FALSE
SPNCRNA.282	EMM_Glu-40h	1.05458	0.0766707	1.14553	0.19602	1.08187	0.113531	1.12397	0.168598	24	0.201798	0.500108	0.300936	0.200506	FALSE
SPNCRNA.282	EMM_Gluc2-40h	1.00071	0.00102417	1.08702	0.120374	1.05337	0.0750072	1.09435	0.130074	12	0.972452	0.993136	0.00299143	0.0336932	FALSE
SPNCRNA.282	EMM_Gluc3-40h	0.919556	-0.120991	0.998863	-0.00164112	0.976452	-0.0343788	1.01444	0.0206885	16	0.0178507	0.156537	0.805383	0.114694	FALSE
SPNCRNA.282	EMM_Gly3-40h	0.955874	-0.0651078	1.03831	0.0542417	0.999428	-0.000825503	1.03831	0.0542417	2	0.479825	0.581916	0.23514	0.066146	FALSE
SPNCRNA.282	EMM_NH4Cl-40h	1	0	1.08625	0.11935	1	0	1.03891	0.0550672	84	1	1	0	0.183666	FALSE
SPNCRNA.282	EMM_Phe-40h	0.937745	-0.0927331	1.01862	0.0266165	0.948668	-0.0760243	0.985579	-0.0209571	12	0.0724002	0.201308	0.696139	0.103111	FALSE
SPNCRNA.282	EMM_Pro-40h	0.984822	-0.0220652	1.06976	0.0972843	1.02313	0.0329932	1.06294	0.0880605	12	0.528371	0.647681	0.188639	0.0572463	FALSE
SPNCRNA.282	H2O2_0.5mM-40h	0.966384	-0.0493318	1.04973	0.0700178	1.00629	0.0090456	1.04544	0.0641128	12	0.134141	0.284383	0.546096	0.0463253	FALSE
SPNCRNA.282	H2O2_1mM-40h	0.948109	-0.0768753	1.02988	0.0424743	0.975282	-0.036109	1.01323	0.0189583	16	0.0584264	0.332469	0.478249	0.0842126	FALSE
SPNCRNA.282	H2O2_3mM-40h	0.965155	-0.0511672	1.0484	0.0681824	1.00866	0.0124381	1.0479	0.0675053	12	0.193807	0.324911	0.488235	0.0707352	FALSE
SPNCRNA.282	HU10mM-40h	0.993432	-0.00950638	1.07911	0.109843	1.03803	0.0538524	1.07842	0.10892	36	0.817853	0.905197	0.0432569	0.140975	FALSE
SPNCRNA.282	HU20mM-40h	0.947764	-0.0774001	1.0295	0.0419495	1.01565	0.0224095	1.05517	0.0774767	32	0.116313	0.200905	0.697009	0.166591	FALSE
SPNCRNA.282	HU5mM-40h	0.953134	-0.0692487	1.03534	0.0501009	0.998164	-0.00265069	1.037	0.0524166	36	0.0498282	0.177513	0.75077	0.0963177	FALSE
SPNCRNA.282	MMS0.005-40h	0.972192	-0.040687	1.05604	0.0786626	1.01312	0.0188064	1.05254	0.0738736	36	0.2348	0.477985	0.320585	0.0925731	FALSE
SPNCRNA.282	MMS0.0075-40h	0.992437	-0.0109525	1.07803	0.108397	1.03763	0.0532895	1.078	0.108357	36	0.739314	0.864958	0.0630052	0.0859117	FALSE
SPNCRNA.282	Rap100ng-40h	1.00073	0.00105266	1.08704	0.120402	1.05342	0.0750816	1.09441	0.130149	28	0.982276	0.989853	0.00442919	0.155219	FALSE
SPNCRNA.282	SDS0.001-40h	0.967537	-0.0476106	1.05098	0.0717389	1.04407	0.0622158	1.08469	0.117283	36	0.202257	0.284658	0.545676	0.112802	FALSE
SPNCRNA.282	SDS0.005-40h	0.953444	-0.0687795	1.03567	0.0505701	0.994434	-0.00805288	1.03312	0.0470144	27	0.112769	0.311907	0.505975	0.125965	FALSE
SPNCRNA.282	Sorb1.2M-40h	0.869569	-0.201628	0.944564	-0.0822788	0.963468	-0.0536907	1.00095	0.00137657	12	0.0173106	0.0759005	1.11976	0.169739	FALSE
SPNCRNA.282	TSA500nM-40h									0					FALSE
SPNCRNA.282	Temp32C-40h	1.04615	0.0650964	1.13638	0.184446	1.0611	0.0855572	1.10238	0.140624	24	0.212503	0.538377	0.268914	0.167191	FALSE
SPNCRNA.282	Temp37C-40h	1.00566	0.00814589	1.0924	0.127495	1.00717	0.0103099	1.04636	0.0653771	20	0.856989	0.872293	0.0593378	0.122401	FALSE
SPNCRNA.282	Torin5uM-40h	0.943371	-0.0841024	1.02473	0.0352472	0.933773	-0.0988557	0.970104	-0.0437885	24	0.0846567	0.240632	0.618647	0.140186	FALSE
SPNCRNA.282	VPA3mM-40h	0.907959	-0.139302	0.986266	-0.019952	0.963786	-0.0532149	1.00128	0.00185239	8	0.00714726	0.031338	1.50393	0.0734251	FALSE
SPNCRNA.282	VPA5mM-40h	1.03625	0.0513734	1.12562	0.170723	1.10211	0.140269	1.14499	0.195336	11	0.223702	0.307253	0.512504	0.0810612	FALSE
SPNCRNA.284	Ant0.1ng-40h	0.998824	-0.00169716	1.01841	0.0263158	1.02257	0.0321997	1.03549	0.0503197	36	0.948463	0.964266	0.0158032	0.0802521	FALSE
SPNCRNA.284	Ant1ng-40h	0.969031	-0.0453849	0.988031	-0.0173719	0.96012	-0.0587135	0.972255	-0.0405935	36	0.142813	0.290726	0.536516	0.102462	FALSE
SPNCRNA.284	Bleo20ug-40h	1.09595	0.132182	1.11744	0.160195	1.07273	0.101284	1.08629	0.119405	19	0.000337346	0.00349613	2.45641	0.0910546	TRUE
SPNCRNA.284	Caff10mM-40h	1.05725	0.0803136	1.07798	0.108327	1.10143	0.139377	1.11535	0.157497	36	0.0209911	0.0849335	1.07092	0.126496	FALSE
SPNCRNA.284	Can60ug-40h	1.10926	0.149595	1.13101	0.177608	1.14107	0.190392	1.1555	0.208512	24	0.000798945	0.00395999	2.40231	0.134279	TRUE
SPNCRNA.284	CoCl0.25mM-40h	1.06179	0.0864923	1.0826	0.114505	1.0595	0.0833792	1.07289	0.101499	12	0.0184067	0.123433	0.908568	0.0727602	FALSE
SPNCRNA.284	Diam2mM-40h	1.0063	0.00905646	1.02603	0.0370695	1.01237	0.0177435	1.02517	0.0358636	12	0.70284	0.785527	0.104839	0.0374514	FALSE
SPNCRNA.284	EGTA10mM-40h	0.928853	-0.106479	0.947064	-0.0784655	0.967272	-0.0480068	0.979497	-0.0298867	11	0.0841228	0.155444	0.808425	0.121084	FALSE
SPNCRNA.284	EMM_Arg-40h	0.894032	-0.161602	0.911561	-0.133589	0.912018	-0.132866	0.923545	-0.114746	24	0.000161214	0.00153154	2.81487	0.110367	TRUE
SPNCRNA.284	EMM_Cyst-40h	0.997232	-0.0039996	1.01678	0.0240134	0.965902	-0.0500511	0.97811	-0.0319311	12	0.948101	0.979675	0.0089178	0.140604	FALSE
SPNCRNA.284	EMM_Gal2-40h	1.00088	0.0012693	1.0205	0.0292823	1.00659	0.00947808	1.01931	0.0275981	23	0.955066	0.974956	0.0110148	0.045283	FALSE
SPNCRNA.284	EMM_Glu-40h	1.03861	0.0546517	1.05897	0.0826647	1.05451	0.0765674	1.06783	0.0946874	36	0.0723597	0.347659	0.458846	0.104511	FALSE
SPNCRNA.284	EMM_Gluc2-40h	1.04704	0.066322	1.06757	0.094335	1.0262	0.0373165	1.03917	0.0554365	12	0.0985649	0.282235	0.54939	0.084406	FALSE
SPNCRNA.284	EMM_Gluc3-40h	0.974766	-0.0368721	0.993878	-0.00885913	1.01272	0.018233	1.02552	0.036353	12	0.550814	0.801368	0.096168	0.138734	FALSE
SPNCRNA.284	EMM_Gly3-40h	1.09732	0.133989	1.11884	0.162002	1.0468	0.0659828	1.06003	0.0841028	23	0.0591472	0.153245	0.814614	0.232822	FALSE
SPNCRNA.284	EMM_NH4Cl-40h	1	0	1.01961	0.028013	1	0	1.01264	0.01812	123	1	1	0	0.141759	FALSE
SPNCRNA.284	EMM_Phe-40h	1.00928	0.0133258	1.02907	0.0413388	1.03756	0.0531982	1.05068	0.0713182	24	0.716663	0.851037	0.0700514	0.110264	FALSE
SPNCRNA.284	EMM_Pro-40h	1.17776	0.236047	1.20085	0.26406	1.18278	0.242176	1.19772	0.260296	36	2.17541e-07	1.37776e-06	5.86083	0.16483	TRUE
SPNCRNA.284	H2O2_0.5mM-40h	1.0754	0.104879	1.09649	0.132892	1.08341	0.115579	1.0971	0.133699	36	0.00280903	0.0355811	1.44878	0.12694	FALSE
SPNCRNA.284	H2O2_1mM-40h	1.00396	0.00569614	1.02364	0.0337091	1.043	0.0607436	1.05619	0.0788636	24	0.917832	0.960774	0.0173788	0.179254	FALSE
SPNCRNA.284	H2O2_3mM-40h	1.1032	0.141699	1.12483	0.169712	1.09707	0.133659	1.11094	0.151779	24	0.00101821	0.0105524	1.97665	0.129329	FALSE
SPNCRNA.284	HU10mM-40h	1.07672	0.10665	1.09784	0.134663	1.06225	0.0871183	1.07567	0.105238	24	0.0123117	0.0320746	1.49384	0.13084	FALSE
SPNCRNA.284	HU20mM-40h	1.12348	0.167978	1.14551	0.195991	1.15254	0.204823	1.16711	0.222943	20	0.00318581	0.0113495	1.94502	0.162008	FALSE
SPNCRNA.284	HU5mM-40h	1.02942	0.0418374	1.04961	0.0698504	1.03115	0.0442524	1.04418	0.0623724	36	0.151203	0.325229	0.487811	0.0977559	FALSE
SPNCRNA.284	MMS0.005-40h	1.04762	0.0671186	1.06816	0.0951316	1.04907	0.0691129	1.06233	0.0872329	32	0.0176248	0.161843	0.790907	0.0872239	FALSE
SPNCRNA.284	MMS0.0075-40h	1.07259	0.101102	1.09362	0.129115	1.10201	0.140133	1.11594	0.158254	24	0.00396472	0.0347675	1.45883	0.101254	FALSE
SPNCRNA.284	Rap100ng-40h	0.995924	-0.0058919	1.01545	0.0221211	0.986008	-0.0203293	0.99847	-0.00220927	36	0.889355	0.956476	0.0193261	0.16101	FALSE
SPNCRNA.284	SDS0.001-40h	1.11	0.150555	1.13176	0.178568	1.14157	0.191023	1.156	0.209143	20	0.00545892	0.0188581	1.7245	0.154323	FALSE
SPNCRNA.284	SDS0.005-40h	1.04688	0.0661007	1.06741	0.0941137	1.0384	0.0543683	1.05153	0.0724884	20	0.0256983	0.104629	0.980348	0.073065	FALSE
SPNCRNA.284	Sorb1.2M-40h	1.01332	0.0190942	1.03319	0.0471072	1.04789	0.0674865	1.06113	0.0856065	12	0.73383	0.79538	0.0994255	0.128174	FALSE
SPNCRNA.284	TSA500nM-40h	0.986265	-0.0199526	1.0056	0.00806037	1.01852	0.026468	1.03139	0.044588	24	0.510718	0.654394	0.18416	0.0825525	FALSE
SPNCRNA.284	Temp32C-40h	1.00339	0.00488424	1.02306	0.0328972	1.02263	0.0322809	1.03555	0.050401	28	0.882412	0.931434	0.0308477	0.102861	FALSE
SPNCRNA.284	Temp37C-40h	1.09919	0.136438	1.12074	0.164451	1.13491	0.182582	1.14926	0.200702	36	0.000174498	0.00168088	2.77446	0.130951	TRUE
SPNCRNA.284	Torin5uM-40h	0.973332	-0.0389964	0.992416	-0.0109834	0.991699	-0.0120256	1.00423	0.0060944	24	0.357331	0.598213	0.223144	0.128342	FALSE
SPNCRNA.284	VPA3mM-40h	1.03699	0.052405	1.05732	0.080418	1.05041	0.0709523	1.06369	0.0890723	32	0.251556	0.403907	0.393718	0.168746	FALSE
SPNCRNA.284	VPA5mM-40h	1.11221	0.153429	1.13402	0.181442	1.13846	0.187089	1.15285	0.205209	12	0.0017565	0.00476765	2.3217	0.0961678	TRUE
SPNCRNA.289	Ant0.1ng-40h	0.951376	-0.0719127	1.01253	0.0179701	0.998896	-0.00159333	1.01883	0.0269088	12	0.043151	0.158684	0.799466	0.0442727	FALSE
SPNCRNA.289	Ant1ng-40h	0.980367	-0.0286056	1.04339	0.0612772	1.02218	0.0316468	1.04257	0.0601489	16	0.479368	0.635442	0.196924	0.0790827	FALSE
SPNCRNA.289	Bleo20ug-40h	0.947285	-0.0781299	1.00818	0.0117529	0.960619	-0.0579633	0.979786	-0.0294611	12	0.0932872	0.174581	0.758002	0.0836701	FALSE
SPNCRNA.289	Caff10mM-40h	0.973889	-0.0381701	1.03649	0.0517127	1.0207	0.029557	1.04106	0.0580592	12	0.354673	0.603474	0.219341	0.0702821	FALSE
SPNCRNA.289	Can60ug-40h	0.917868	-0.123641	0.976872	-0.0337582	0.946527	-0.0792847	0.965413	-0.0507825	32	0.00886772	0.0280811	1.55159	0.137586	FALSE
SPNCRNA.289	CoCl0.25mM-40h	1.04098	0.0579492	1.1079	0.147832	1.04444	0.0627361	1.06528	0.0912383	24	0.177598	0.462238	0.335134	0.115301	FALSE
SPNCRNA.289	Diam2mM-40h	0.789762	-0.34051	0.840531	-0.250628	0.807022	-0.309319	0.823125	-0.280817	12	2.41768e-05	0.000393737	3.40479	0.121778	TRUE
SPNCRNA.289	EGTA10mM-40h									0					FALSE
SPNCRNA.289	EMM_Arg-40h	0.921466	-0.117997	0.980702	-0.0281138	1.11948	0.162827	1.14182	0.191329	4	0.72836	0.898626	0.0464212	0.437006	FALSE
SPNCRNA.289	EMM_Cyst-40h	0.896218	-0.158079	0.95383	-0.0681962	0.93805	-0.0922636	0.956766	-0.0637614	4	0.321519	0.531205	0.274738	0.185091	FALSE
SPNCRNA.289	EMM_Gal2-40h	0.914032	-0.129684	0.972789	-0.0398007	0.924121	-0.113847	0.942559	-0.0853444	12	0.026089	0.0893351	1.04898	0.11006	FALSE
SPNCRNA.289	EMM_Glu-40h	0.995608	-0.00635063	1.05961	0.0835322	1.02573	0.0366496	1.04619	0.0651517	24	0.895627	0.945384	0.0243916	0.137453	FALSE
SPNCRNA.289	EMM_Gluc2-40h	0.943959	-0.0832046	1.00464	0.0066782	0.986044	-0.0202767	1.00572	0.00822544	11	0.026789	0.17809	0.74936	0.0493432	FALSE
SPNCRNA.289	EMM_Gluc3-40h	1.05334	0.0749665	1.12105	0.164849	1.03351	0.0475518	1.05413	0.0760539	16	0.219474	0.510612	0.291909	0.158023	FALSE
SPNCRNA.289	EMM_Gly3-40h	0.866935	-0.206003	0.922665	-0.116121	0.907397	-0.140194	0.925502	-0.111692	4	0.00133729	0.0108894	1.963	0.0473056	FALSE
SPNCRNA.289	EMM_NH4Cl-40h	1	0	1.06428	0.0898828	1	0	1.01995	0.0285021	83	1	1	0	0.197603	FALSE
SPNCRNA.289	EMM_Phe-40h	0.930568	-0.103816	0.990388	-0.0139336	0.959197	-0.060101	0.978335	-0.0315989	12	0.151357	0.333608	0.476764	0.152835	FALSE
SPNCRNA.289	EMM_Pro-40h	0.986159	-0.0201079	1.04955	0.0697749	1.02867	0.0407828	1.0492	0.069285	12	0.55978	0.671736	0.172801	0.044118	FALSE
SPNCRNA.289	H2O2_0.5mM-40h	0.982162	-0.025967	1.0453	0.0639158	1.02188	0.0312316	1.04227	0.0597338	12	0.405983	0.585849	0.232214	0.0236791	FALSE
SPNCRNA.289	H2O2_1mM-40h	0.99269	-0.0105846	1.0565	0.0792982	1.02987	0.0424689	1.05042	0.0709711	16	0.778288	0.908813	0.0415253	0.0677877	FALSE
SPNCRNA.289	H2O2_3mM-40h	1.00774	0.0111278	1.07252	0.101011	1.0503	0.0708014	1.07126	0.0993035	12	0.770147	0.828271	0.0818277	0.0616594	FALSE
SPNCRNA.289	HU10mM-40h	0.899687	-0.152504	0.957523	-0.0626216	0.93945	-0.0901112	0.958195	-0.061609	36	0.00119288	0.00367536	2.4347	0.140495	TRUE
SPNCRNA.289	HU20mM-40h	1.02474	0.0352591	1.09061	0.125142	1.09653	0.132945	1.11841	0.161447	32	0.452764	0.606958	0.216841	0.154516	FALSE
SPNCRNA.289	HU5mM-40h	0.921873	-0.11736	0.981134	-0.0274776	0.964332	-0.0523982	0.983573	-0.023896	36	0.000912218	0.00649956	2.18712	0.0671614	FALSE
SPNCRNA.289	MMS0.005-40h	0.989636	-0.0150296	1.05325	0.0748532	1.02653	0.0377726	1.04701	0.0662748	36	0.678198	0.797058	0.0985103	0.0915175	FALSE
SPNCRNA.289	MMS0.0075-40h	0.995582	-0.00638813	1.05958	0.0834947	1.03456	0.0490196	1.0552	0.0775217	36	0.855016	0.920675	0.0358936	0.0824565	FALSE
SPNCRNA.289	Rap100ng-40h	0.965866	-0.0501058	1.02795	0.039777	1.04592	0.0647779	1.06679	0.09328	28	0.348774	0.667769	0.175374	0.167913	FALSE
SPNCRNA.289	SDS0.001-40h	0.925938	-0.111013	0.985461	-0.0211299	0.958741	-0.0607867	0.977871	-0.0322846	36	0.0115792	0.0330714	1.48055	0.129815	FALSE
SPNCRNA.289	SDS0.005-40h	0.956563	-0.0640678	1.01805	0.025815	0.958359	-0.0613616	0.977481	-0.0328595	28	0.114913	0.311907	0.505975	0.102195	FALSE
SPNCRNA.289	Sorb1.2M-40h	0.954208	-0.0676241	1.01555	0.0222587	1.04954	0.0697591	1.07048	0.0982613	12	0.345144	0.499108	0.301805	0.156629	FALSE
SPNCRNA.289	TSA500nM-40h									0					FALSE
SPNCRNA.289	Temp32C-40h	1.06422	0.0897949	1.13263	0.179678	1.06203	0.086824	1.08322	0.115326	24	0.09271	0.392934	0.405681	0.163337	FALSE
SPNCRNA.289	Temp37C-40h	1.1055	0.144698	1.17657	0.234581	1.03987	0.0564075	1.06062	0.0849096	20	0.0365153	0.0773029	1.1118	0.207006	FALSE
SPNCRNA.289	Torin5uM-40h	0.994173	-0.00843111	1.05808	0.0814517	1.0082	0.0117873	1.02832	0.0402894	24	0.891004	0.962251	0.0167115	0.192899	FALSE
SPNCRNA.289	VPA3mM-40h	0.888997	-0.169749	0.946145	-0.0798662	0.871733	-0.198041	0.889127	-0.169539	8	0.070362	0.186541	0.729226	0.15193	FALSE
SPNCRNA.289	VPA5mM-40h	1.02026	0.0289437	1.08585	0.118826	1.08737	0.120837	1.10906	0.149339	11	0.526736	0.619051	0.208274	0.0852851	FALSE
SPNCRNA.30	Ant0.1ng-40h	0.99288	-0.0103083	1.05747	0.0806141	0.991068	-0.0129444	1.05265	0.07402	36	0.597874	0.79267	0.100908	0.0542931	FALSE
SPNCRNA.30	Ant1ng-40h	0.9845	-0.0225376	1.04854	0.0683848	0.988345	-0.0169135	1.04975	0.070051	36	0.244221	0.449051	0.347704	0.0521216	FALSE
SPNCRNA.30	Bleo20ug-40h	0.901384	-0.149786	0.96002	-0.0588638	1.01302	0.0186596	1.07596	0.105624	20	0.161989	0.268005	0.571858	0.319583	FALSE
SPNCRNA.30	Caff10mM-40h	1.00269	0.00387703	1.06792	0.0947995	0.990007	-0.0144899	1.05152	0.0724746	36	0.889978	0.948201	0.0230996	0.104297	FALSE
SPNCRNA.30	Can60ug-40h	1.11354	0.15515	1.18597	0.246073	1.12488	0.169776	1.19478	0.25674	24	1.70637e-08	9.72634e-07	6.01205	0.0711273	TRUE
SPNCRNA.30	CoCl0.25mM-40h	1.0055	0.00791333	1.07091	0.0988358	1.00013	0.000192861	1.06228	0.0871573	12	0.813536	0.932231	0.0304765	0.0754626	FALSE
SPNCRNA.30	Diam2mM-40h	1.01063	0.0152501	1.07637	0.106173	1.00751	0.0107976	1.07011	0.0977621	12	0.504239	0.605087	0.218182	0.0434337	FALSE
SPNCRNA.30	EGTA10mM-40h	1.01278	0.0183236	1.07866	0.109246	1.03129	0.0444495	1.09537	0.131414	12	0.388358	0.550174	0.2595	0.0379554	FALSE
SPNCRNA.30	EMM_Arg-40h	0.889265	-0.169315	0.947112	-0.0783929	0.895418	-0.159367	0.951053	-0.0724022	24	6.6785e-06	0.000155373	3.80863	0.0969138	TRUE
SPNCRNA.30	EMM_Cyst-40h	1.06889	0.0961098	1.13842	0.187032	1.0669	0.0934224	1.13319	0.180387	12	0.000353637	0.00310113	2.50848	0.0491481	TRUE
SPNCRNA.30	EMM_Gal2-40h	0.971946	-0.0410524	1.03517	0.04987	0.98069	-0.028131	1.04162	0.0588334	24	0.156084	0.30943	0.509437	0.0855492	FALSE
SPNCRNA.30	EMM_Glu-40h	1.03079	0.0437563	1.09785	0.134679	1.03141	0.0446249	1.0955	0.131589	36	0.171449	0.465363	0.332208	0.125398	FALSE
SPNCRNA.30	EMM_Gluc2-40h	0.944786	-0.0819407	1.00625	0.00898171	0.960026	-0.058855	1.01968	0.0281094	12	0.01914	0.145782	0.836296	0.0694559	FALSE
SPNCRNA.30	EMM_Gluc3-40h	0.946359	-0.0795403	1.00792	0.0113821	0.9648	-0.0516988	1.02475	0.0352657	12	0.00380522	0.072003	1.14265	0.0493568	FALSE
SPNCRNA.30	EMM_Gly3-40h	0.983379	-0.0241811	1.04735	0.0667414	1.0171	0.0244647	1.0803	0.111429	22	0.51964	0.617072	0.209664	0.116264	FALSE
SPNCRNA.30	EMM_NH4Cl-40h	1	0	1.06505	0.0909224	1	0	1.06213	0.0869645	124	1	1	0	0.123903	FALSE
SPNCRNA.30	EMM_Phe-40h	0.994008	-0.00867002	1.05867	0.0822524	0.997738	-0.00326653	1.05973	0.083698	24	0.710022	0.851037	0.0700514	0.0635132	FALSE
SPNCRNA.30	EMM_Pro-40h	1.17193	0.22888	1.24816	0.319803	1.12739	0.172985	1.19744	0.25995	36	5.9294e-06	2.33087e-05	4.63248	0.202	TRUE
SPNCRNA.30	H2O2_0.5mM-40h	0.999706	-0.000424817	1.06474	0.0904976	0.974374	-0.037452	1.03492	0.0495124	36	0.990037	0.990037	0.00434873	0.13428	FALSE
SPNCRNA.30	H2O2_1mM-40h	1.02238	0.0319378	1.08889	0.12286	0.988173	-0.0171643	1.04957	0.0698002	24	0.495784	0.796047	0.0990613	0.160258	FALSE
SPNCRNA.30	H2O2_3mM-40h	1.07217	0.100529	1.14191	0.191451	1.07393	0.102902	1.14066	0.189866	24	0.00459092	0.025422	1.59479	0.111702	FALSE
SPNCRNA.30	HU10mM-40h	1.11865	0.161763	1.19142	0.252686	1.14282	0.192595	1.21382	0.279559	24	4.9634e-08	1.41457e-06	5.84938	0.0788966	TRUE
SPNCRNA.30	HU20mM-40h	1.1259	0.171077	1.19914	0.261999	1.11696	0.159578	1.18636	0.246542	20	0.00230971	0.0101272	1.99451	0.167309	FALSE
SPNCRNA.30	HU5mM-40h	1.02893	0.0411447	1.09586	0.132067	1.02409	0.034346	1.08772	0.121311	36	0.026655	0.121547	0.915256	0.0485628	FALSE
SPNCRNA.30	MMS0.005-40h	1.01019	0.0146218	1.0759	0.105544	1.01211	0.0173654	1.07499	0.10433	32	0.549185	0.68799	0.162418	0.0802509	FALSE
SPNCRNA.30	MMS0.0075-40h	1.03585	0.0508174	1.10323	0.14174	1.04327	0.061112	1.10809	0.148076	24	0.0375742	0.178478	0.748416	0.0688868	FALSE
SPNCRNA.30	Rap100ng-40h	0.981691	-0.0266595	1.04555	0.0642629	0.967433	-0.0477668	1.02754	0.0391977	36	0.38703	0.689397	0.16153	0.1165	FALSE
SPNCRNA.30	SDS0.001-40h	1.06743	0.0941367	1.13686	0.185059	1.07316	0.101864	1.13984	0.188829	20	0.000171133	0.00177356	2.75115	0.061265	TRUE
SPNCRNA.30	SDS0.005-40h	1.07144	0.09955	1.14114	0.190472	1.07662	0.106513	1.14352	0.193477	20	2.66019e-06	5.05437e-05	4.29633	0.0449522	TRUE
SPNCRNA.30	Sorb1.2M-40h	0.926436	-0.110236	0.986702	-0.019314	0.925557	-0.111607	0.983064	-0.0246423	12	0.000999844	0.0117842	1.9287	0.0600675	FALSE
SPNCRNA.30	TSA500nM-40h	0.966087	-0.0497753	1.02893	0.0411472	0.979562	-0.0297912	1.04043	0.0571733	24	0.0840771	0.187155	0.727798	0.0840274	FALSE
SPNCRNA.30	Temp32C-40h	0.981023	-0.0276409	1.04484	0.0632815	1.00489	0.00703172	1.06732	0.0939962	28	0.436179	0.776943	0.109611	0.122578	FALSE
SPNCRNA.30	Temp37C-40h	1.05964	0.0835774	1.12857	0.1745	1.05354	0.075248	1.119	0.162212	36	0.0106223	0.028832	1.54012	0.127742	FALSE
SPNCRNA.30	Torin5uM-40h	0.969995	-0.0439503	1.03309	0.0469721	0.976997	-0.0335734	1.0377	0.0533911	23	0.055605	0.176583	0.753052	0.0578049	FALSE
SPNCRNA.30	VPA3mM-40h	1.01038	0.014902	1.07611	0.105824	1.02283	0.0325666	1.08638	0.119531	32	0.479013	0.634149	0.197809	0.061559	FALSE
SPNCRNA.30	VPA5mM-40h	1.09823	0.135182	1.16967	0.226105	1.1309	0.177475	1.20117	0.26444	12	0.000516385	0.00210242	2.67728	0.0759575	TRUE
SPNCRNA.31	Ant0.1ng-40h	0.974445	-0.0373474	0.992456	-0.0109245	1.01034	0.0148452	1.04392	0.0620058	12	0.626513	0.79267	0.100908	0.175795	FALSE
SPNCRNA.31	Ant1ng-40h	0.984631	-0.0223454	1.00283	0.00407755	0.973067	-0.0393895	1.0054	0.0077711	16	0.650515	0.749078	0.125473	0.127355	FALSE
SPNCRNA.31	Bleo20ug-40h	0.994651	-0.00773821	1.01304	0.0186847	0.960087	-0.0587634	0.99199	-0.0116029	12	0.92651	0.92651	0.0331498	0.196022	FALSE
SPNCRNA.31	Caff10mM-40h	1.03164	0.0449427	1.05071	0.0713656	1.00993	0.0142574	1.04349	0.061418	12	0.0272431	0.0970534	1.01299	0.0270033	FALSE
SPNCRNA.31	Can60ug-40h	1.10382	0.142506	1.12422	0.168929	1.00405	0.00583339	1.03742	0.052994	32	0.0272912	0.0661957	1.17917	0.25084	FALSE
SPNCRNA.31	CoCl0.25mM-40h	0.999033	-0.00139536	1.0175	0.0250276	0.947715	-0.0774746	0.979207	-0.030314	24	0.971314	0.986821	0.00576174	0.119537	FALSE
SPNCRNA.31	Diam2mM-40h	0.990497	-0.0137759	1.0088	0.012647	0.935607	-0.0960253	0.966697	-0.0488647	12	0.813912	0.867228	0.061867	0.133313	FALSE
SPNCRNA.31	EGTA10mM-40h									0					FALSE
SPNCRNA.31	EMM_Arg-40h	1.10656	0.146079	1.12701	0.172502	1.00777	0.0111668	1.04126	0.0583274	4	0.329035	0.644427	0.190826	0.186272	FALSE
SPNCRNA.31	EMM_Cyst-40h	1.10715	0.146849	1.12761	0.173272	1.05858	0.0821261	1.09375	0.129287	4	0.319273	0.531205	0.274738	0.182855	FALSE
SPNCRNA.31	EMM_Gal2-40h	1.11995	0.163432	1.14065	0.189855	1.12499	0.169912	1.16237	0.217073	9	0.000159457	0.00225233	2.64737	0.0622483	TRUE
SPNCRNA.31	EMM_Glu-40h	0.91561	-0.127195	0.932534	-0.100772	0.92877	-0.106606	0.959633	-0.0594456	24	0.000107858	0.0122958	1.91024	0.0810475	FALSE
SPNCRNA.31	EMM_Gluc2-40h	0.996122	-0.00560502	1.01453	0.0208179	0.939889	-0.089438	0.971121	-0.0422775	12	0.921826	0.993136	0.00299143	0.130342	FALSE
SPNCRNA.31	EMM_Gluc3-40h	0.959931	-0.0589976	0.977674	-0.0325747	0.922248	-0.116773	0.952894	-0.0696127	16	0.347377	0.679934	0.167533	0.162166	FALSE
SPNCRNA.31	EMM_Gly3-40h	1.0199	0.0284267	1.03875	0.0548496	0.971293	-0.042021	1.00357	0.00513953	4	0.755679	0.812711	0.0900638	0.117335	FALSE
SPNCRNA.31	EMM_NH4Cl-40h	1	0	1.01848	0.0264229	1	0	1.03323	0.0471606	84	1	1	0	0.109832	FALSE
SPNCRNA.31	EMM_Phe-40h	1.01102	0.015809	1.02971	0.042232	0.875245	-0.192241	0.904329	-0.14508	12	0.89105	0.943577	0.0252228	0.274471	FALSE
SPNCRNA.31	EMM_Pro-40h	1.1039	0.142611	1.12431	0.169034	1.05151	0.0724599	1.08645	0.11962	12	0.00356862	0.0076759	2.11487	0.0981048	TRUE
SPNCRNA.31	H2O2_0.5mM-40h	0.991224	-0.0127165	1.00955	0.0137064	0.97531	-0.0360672	1.00772	0.0110934	12	0.564271	0.739389	0.131127	0.0335473	FALSE
[truncated: 3,359 more rows]

## Sheet: hits_table
													## SLOW : slower growing relative to empty vector control after normalising to growth in benign condition
													##FAST: faster growing relative to empty vector control after normalising to growth in benign condition
													##NS: Not statistically significant (see methods for details)
Gene	EMM_NH4Cl	3AT10mM	3AT20mM	Ant1ng	Bleo20ug	Bref60uM	Caff10mM	Can60ug	CoCl0.25mM	Diam2mM	EGTA10mM	EMM_Arg	EMM_Cyst	EMM_Gal2	EMM_Gluc0.5	EMM_Gluc2	EMM_Gluc3	EMM_Gly3	EMM_Iso	EMM_Met	EMM_Phe	EMM_Pro	H2O2_0.5mM	H2O2_3mM	HU10mM	HU20mM	HU5mM	KCl1M	MMS0.005	MMS0.0075	Rap1ug	SDS0.001	SDS0.005	Sorb1.2M	TBH0.2mM	TBH1mM	Temp25C	Temp32C	Temp37C	Torin5uM	TSA500nM	VPA3mM	VPA5mM
SPNCRNA.103	NS	SLOW	NS	NS	NS	NS	NS	NS	NS	SLOW	NS	NS	SLOW	SLOW	NS	NS	NS	SLOW	NS	NS	NS	NS	NS	NS	SLOW	NS	SLOW	NS	NS	NS	NS	NS	NS	NS	NS	NS	NS	NS	NS	NS	SLOW	SLOW	NS
SPNCRNA.1039	NS	NS	NS	NS	NS	NS	NS	NS	NS	NS	NS	NS	NS	NS	NS	NS	NS	NS	NS	NS	NS	FAST	FAST	FAST	NS	NS	NS	NS	NS	NS	FAST	FAST	NS	NS	NS	NS	NS	NS	FAST	NS	NS	NS	NS
SPNCRNA.1064	FAST	NS	NS	NS	NS	NS	NS	FAST	NS	NS	NS	NS	FAST	NS	NS	NS	NS	NS	NS	NS	NS	FAST	NS	NS	FAST	FAST	NS	SLOW	NS	FAST	NS	FAST	NS	NS	NS	NS	NS	NS	NS	FAST	NS	NS	FAST
SPNCRNA.1073	NS	NS	NS	NS	FAST	NS	NS	FAST	NS	NS	NS	NS	FAST	NS	NS	SLOW	NS	NS	NS	NS	NS	FAST	NS	NS	FAST	FAST	NS	NS	NS	NS	NS	FAST	NS	NS	NS	NS	NS	NS	FAST	NS	NS	NS	FAST
SPNCRNA.1088	NS	NS	NS	NS	FAST	NS	NS	NS	NS	NS	FAST	NS	NS	NS	NS	NS	NS	NS	NS	NS	NS	FAST	NS	NS	FAST	FAST	NS	NS	NS	NS	NS	NS	NS	NS	SLOW	NS	NS	NS	FAST	NS	NS	NS	FAST
SPNCRNA.1097	NS	NS	NS	NS	NS	NS	NS	FAST	NS	NS	NS	NS	FAST	SLOW	NS	NS	NS	NS	NS	NS	NS	FAST	NS	NS	FAST	FAST	NS	NS	NS	NS	NS	NS	NS	NS	NS	NS	NS	NS	FAST	NS	SLOW	NS	NS
SPNCRNA.1125	NS	NS	NS	NS	NS	NS	NS	NS	NS	NS	NS	NS	NS	NS	NS	NS	NS	NS	NS	NS	NS	NS	NS	NS	NS	NS	NS	SLOW	NS	NS	NS	NS	NS	NS	NS	NS	NS	NS	NS	NS	NS	SLOW	NS
SPNCRNA.1130	NS	NS	NS	NS	NS	NS	SLOW	NS	NS	NS	NS	FAST	NS	SLOW	SLOW	NS	NS	SLOW	NS	SLOW	SLOW	FAST	NS	NS	NS	NS	NS	SLOW	NS	FAST	FAST	FAST	NS	NS	NS	FAST	NS	NS	NS	NS	NS	SLOW	NS
SPNCRNA.1154	NS	SLOW	NS	NS	NS	NS	NS	NS	NS	SLOW	SLOW	NS	SLOW	SLOW	NS	NS	NS	SLOW	NS	SLOW	SLOW	NS	NS	NS	NS	NS	SLOW	NS	NS	NS	NS	NS	SLOW	NS	NS	NS	NS	NS	NS	NS	SLOW	SLOW	SLOW
SPNCRNA.1165	FAST	NS	NS	NS	NS	NS	NS	FAST	NS	NS	NS	NS	NS	NS	NS	NS	NS	NS	NS	NS	NS	NS	NS	NS	NS	NS	NS	NS	NS	NS	SLOW	NS	NS	NS	NS	NS	NS	NS	NS	NS	NS	NS	NS
SPNCRNA.1166	NS	NS	NS	SLOW	NS	NS	NS	NS	NS	NS	SLOW	NS	NS	NS	NS	NS	NS	NS	NS	NS	NS	NS	NS	NS	NS	NS	NS	NS	NS	NS	NS	NS	NS	NS	NS	NS	NS	NS	NS	NS	NS	NS	NS
SPNCRNA.12	NS	FAST	NS	NS	NS	NS	NS	NS	NS	NS	NS	NS	NS	NS	NS	NS	NS	NS	NS	NS	NS	FAST	NS	FAST	NS	NS	NS	NS	NS	NS	NS	FAST	NS	NS	NS	NS	NS	NS	NS	NS	NS	FAST	NS
SPNCRNA.1249	NS	NS	NS	NS	NS	NS	NS	NS	NS	NS	SLOW	NS	NS	NS	NS	NS	NS	NS	NS	NS	NS	NS	NS	NS	NS	NS	NS	NS	NS	NS	NS	NS	NS	NS	NS	NS	NS	NS	NS	NS	SLOW	NS	NS
SPNCRNA.1255	NS	NS	NS	NS	NS	NS	NS	FAST	NS	NS	NS	NS	NS	NS	NS	NS	NS	NS	NS	NS	NS	NS	NS	NS	NS	NS	NS	NS	NS	NS	NS	NS	NS	NS	NS	NS	NS	NS	NS	NS	NS	NS	NS
SPNCRNA.130	FAST	FAST	NS	NS	NS	NS	FAST	NS	NS	FAST	NS	SLOW	FAST	NS	NS	NS	NS	FAST	NS	NS	NS	FAST	NS	NS	FAST	NS	FAST	NS	NS	NS	NS	FAST	NS	NS	NS	NS	NS	NS	NS	NS	NS	NS	FAST
SPNCRNA.1306	NS	NS	NS	NS	NS	NS	NS	NS	NS	NS	NS	NS	NS	NS	NS	NS	NS	NS	NS	NS	NS	FAST	NS	NS	NS	NS	NS	SLOW	NS	NS	NS	NS	NS	NS	NS	NS	NS	NS	NS	NS	NS	NS	FAST
SPNCRNA.1326	NS	NS	NS	NS	SLOW	NS	NS	NS	NS	NS	NS	NS	NS	NS	NS	NS	NS	NS	NS	NS	NS	NS	NS	NS	NS	NS	NS	NS	NS	NS	NS	NS	NS	NS	NS	NS	NS	NS	NS	NS	NS	NS	FAST
SPNCRNA.1341	NS	NS	NS	NS	NS	NS	NS	FAST	NS	NS	NS	NS	NS	NS	NS	NS	NS	NS	NS	NS	NS	FAST	NS	NS	NS	FAST	NS	NS	NS	NS	NS	NS	NS	NS	NS	NS	NS	NS	NS	NS	NS	NS	FAST
SPNCRNA.1343	NS	NS	NS	NS	NS	NS	NS	NS	NS	NS	SLOW	NS	NS	NS	NS	NS	NS	NS	NS	NS	NS	NS	NS	NS	NS	NS	NS	NS	NS	NS	NS	NS	NS	NS	NS	NS	NS	NS	NS	NS	NS	NS	NS
SPNCRNA.1348	FAST	NS	NS	NS	NS	NS	NS	NS	NS	NS	NS	NS	NS	NS	NS	NS	NS	NS	NS	NS	NS	FAST	NS	NS	NS	NS	NS	NS	NS	NS	NS	NS	NS	NS	NS	NS	NS	NS	NS	NS	NS	NS	FAST
SPNCRNA.1361	NS	FAST	NS	NS	NS	NS	NS	FAST	NS	NS	NS	SLOW	NS	NS	NS	NS	NS	FAST	NS	NS	NS	FAST	NS	NS	FAST	NS	NS	NS	NS	NS	NS	FAST	NS	FAST	NS	NS	NS	NS	FAST	NS	NS	NS	FAST
SPNCRNA.137	FAST	NS	NS	NS	NS	NS	NS	NS	NS	NS	NS	SLOW	NS	NS	NS	NS	NS	NS	NS	NS	NS	FAST	NS	NS	FAST	FAST	SLOW	NS	NS	SLOW	NS	NS	NS	NS	NS	SLOW	NS	NS	NS	NS	NS	NS	FAST
SPNCRNA.1415	NS	NS	NS	NS	NS	NS	NS	FAST	NS	NS	NS	SLOW	FAST	NS	NS	NS	NS	NS	NS	NS	NS	FAST	NS	NS	FAST	NS	NS	NS	NS	NS	NS	NS	NS	NS	NS	NS	NS	NS	FAST	NS	NS	NS	NS
SPNCRNA.1425	SLOW	NS	NS	NS	NS	NS	NS	NS	NS	NS	NS	NS	NS	NS	NS	NS	NS	NS	NS	NS	NS	NS	NS	NS	NS	NS	NS	NS	NS	NS	NS	NS	NS	NS	NS	NS	NS	NS	NS	NS	NS	NS	NS
SPNCRNA.144	NS	NS	NS	NS	NS	NS	NS	NS	NS	NS	NS	NS	NS	NS	NS	NS	NS	NS	NS	NS	NS	NS	NS	NS	NS	NS	NS	NS	NS	NS	NS	NS	NS	NS	NS	NS	NS	NS	NS	NS	NS	NS	FAST
SPNCRNA.1443	NS	NS	NS	NS	NS	NS	NS	NS	NS	FAST	NS	NS	NS	NS	NS	NS	NS	NS	NS	NS	NS	FAST	NS	NS	FAST	FAST	NS	SLOW	NS	NS	NS	FAST	NS	NS	NS	NS	NS	NS	NS	NS	NS	NS	NS
SPNCRNA.145	FAST	NS	NS	NS	NS	NS	NS	NS	NS	NS	NS	SLOW	NS	SLOW	NS	NS	NS	NS	NS	NS	NS	FAST	NS	NS	FAST	FAST	NS	NS	NS	NS	SLOW	NS	FAST	NS	NS	SLOW	NS	NS	NS	NS	SLOW	NS	NS
SPNCRNA.1460	NS	NS	NS	NS	FAST	NS	NS	FAST	NS	NS	NS	SLOW	NS	NS	NS	NS	SLOW	NS	NS	NS	NS	FAST	NS	NS	FAST	NS	NS	NS	NS	NS	SLOW	NS	NS	NS	NS	NS	NS	NS	FAST	NS	NS	NS	FAST
SPNCRNA.1530	NS	SLOW	NS	NS	NS	NS	NS	SLOW	NS	SLOW	NS	NS	SLOW	NS	NS	NS	NS	SLOW	SLOW	NS	SLOW	NS	NS	NS	SLOW	NS	NS	SLOW	NS	NS	NS	NS	SLOW	NS	NS	NS	NS	NS	NS	NS	SLOW	SLOW	SLOW
SPNCRNA.1559	NS	NS	NS	NS	SLOW	SLOW	NS	NS	NS	NS	NS	NS	NS	NS	NS	NS	NS	SLOW	NS	NS	SLOW	NS	NS	NS	NS	NS	NS	SLOW	NS	NS	NS	NS	NS	NS	NS	NS	NS	NS	NS	NS	NS	SLOW	SLOW
SPNCRNA.1562	NS	NS	NS	NS	NS	NS	NS	NS	NS	NS	SLOW	NS	NS	NS	NS	NS	NS	SLOW	NS	NS	NS	NS	NS	NS	NS	NS	NS	NS	NS	NS	NS	NS	NS	NS	NS	NS	NS	NS	NS	NS	NS	NS	NS
SPNCRNA.159	NS	NS	NS	NS	NS	NS	NS	NS	NS	NS	NS	NS	NS	NS	NS	NS	NS	NS	NS	NS	NS	NS	NS	NS	NS	NS	NS	NS	NS	NS	NS	NS	NS	NS	NS	NS	NS	NS	NS	NS	NS	NS	FAST
SPNCRNA.1624	NS	NS	NS	NS	NS	SLOW	NS	NS	NS	NS	NS	NS	NS	NS	NS	NS	NS	NS	NS	NS	NS	NS	NS	NS	NS	NS	NS	SLOW	NS	NS	SLOW	NS	NS	NS	NS	NS	NS	NS	NS	NS	SLOW	NS	NS
SPNCRNA.1642	NS	NS	NS	NS	NS	NS	NS	FAST	NS	NS	NS	NS	NS	NS	NS	NS	NS	NS	NS	NS	NS	FAST	NS	NS	NS	FAST	NS	NS	NS	FAST	NS	FAST	NS	NS	NS	NS	NS	NS	NS	NS	NS	NS	FAST
SPNCRNA.1670	NS	NS	NS	NS	NS	NS	NS	NS	NS	NS	SLOW	NS	NS	NS	NS	NS	NS	NS	NS	NS	NS	NS	NS	NS	NS	NS	NS	NS	NS	NS	NS	NS	NS	NS	NS	NS	NS	NS	NS	NS	NS	NS	NS
SPNCRNA.1696	NS	NS	NS	NS	NS	NS	NS	NS	NS	SLOW	NS	NS	NS	NS	NS	NS	NS	NS	NS	NS	NS	NS	NS	NS	NS	NS	NS	SLOW	NS	NS	SLOW	NS	NS	NS	NS	NS	NS	NS	NS	NS	NS	NS	NS
SPNCRNA.175	FAST	NS	NS	FAST	NS	NS	NS	NS	NS	NS	NS	NS	NS	SLOW	NS	SLOW	NS	NS	NS	NS	NS	FAST	NS	NS	FAST	FAST	NS	SLOW	NS	NS	SLOW	NS	NS	NS	NS	NS	NS	NS	NS	NS	NS	NS	FAST
SPNCRNA.177	NS	NS	NS	NS	NS	NS	FAST	NS	NS	NS	NS	NS	NS	NS	NS	NS	NS	NS	SLOW	NS	NS	FAST	NS	FAST	NS	NS	NS	NS	NS	SLOW	NS	NS	NS	NS	FAST	NS	NS	NS	FAST	NS	NS	NS	FAST
SPNCRNA.187	NS	NS	NS	NS	NS	NS	NS	NS	NS	NS	NS	NS	FAST	NS	NS	NS	NS	SLOW	NS	NS	NS	FAST	NS	NS	NS	NS	NS	NS	NS	NS	NS	NS	NS	NS	NS	NS	NS	NS	FAST	FAST	NS	NS	NS
SPNCRNA.188	NS	NS	NS	NS	SLOW	NS	NS	NS	NS	NS	NS	NS	NS	NS	NS	NS	NS	NS	NS	NS	NS	NS	NS	NS	NS	NS	NS	NS	NS	NS	NS	NS	NS	NS	NS	NS	NS	NS	NS	NS	NS	SLOW	NS
SPNCRNA.189	NS	NS	NS	NS	NS	NS	NS	NS	NS	NS	NS	NS	NS	NS	NS	NS	NS	NS	NS	NS	NS	NS	NS	NS	NS	NS	NS	NS	NS	NS	NS	NS	NS	NS	NS	NS	NS	NS	NS	NS	NS	NS	FAST
SPNCRNA.190	NS	NS	NS	NS	NS	NS	NS	NS	NS	NS	NS	NS	NS	NS	NS	NS	NS	NS	SLOW	NS	NS	NS	NS	NS	NS	NS	NS	NS	NS	NS	NS	NS	NS	NS	NS	SLOW	NS	NS	NS	NS	NS	NS	FAST
SPNCRNA.194	NS	NS	NS	NS	NS	NS	FAST	NS	NS	NS	NS	NS	NS	NS	NS	NS	NS	NS	NS	NS	NS	NS	NS	NS	NS	NS	NS	NS	NS	NS	NS	NS	NS	NS	NS	NS	NS	NS	NS	NS	NS	NS	FAST
SPNCRNA.236	FAST	FAST	NS	NS	NS	NS	NS	FAST	NS	NS	NS	NS	NS	NS	NS	NS	NS	NS	NS	NS	NS	FAST	NS	NS	FAST	FAST	FAST	NS	NS	NS	SLOW	FAST	NS	NS	NS	NS	NS	NS	FAST	NS	NS	NS	FAST
SPNCRNA.242	NS	NS	NS	NS	NS	NS	NS	NS	NS	NS	NS	NS	FAST	NS	NS	NS	NS	NS	NS	NS	NS	FAST	NS	FAST	FAST	FAST	NS	NS	NS	NS	NS	FAST	NS	NS	NS	NS	NS	NS	FAST	NS	NS	NS	FAST
SPNCRNA.248	NS	NS	NS	NS	FAST	NS	NS	NS	NS	NS	NS	NS	NS	NS	NS	NS	NS	NS	NS	NS	NS	FAST	NS	NS	NS	NS	NS	NS	NS	NS	SLOW	NS	NS	NS	NS	NS	NS	NS	FAST	NS	NS	NS	NS
SPNCRNA.256	FAST	NS	NS	NS	NS	NS	NS	NS	NS	NS	NS	SLOW	NS	NS	NS	NS	NS	NS	NS	SLOW	NS	FAST	NS	NS	FAST	NS	NS	NS	NS	NS	NS	NS	NS	NS	NS	SLOW	NS	NS	NS	NS	NS	NS	FAST
SPNCRNA.26	FAST	FAST	FAST	NS	NS	NS	NS	NS	NS	NS	SLOW	FAST	NS	NS	NS	NS	NS	NS	NS	NS	NS	NS	NS	NS	FAST	NS	NS	SLOW	NS	SLOW	NS	NS	NS	NS	NS	NS	NS	NS	NS	NS	NS	NS	NS
SPNCRNA.282	NS	NS	NS	NS	NS	NS	NS	NS	NS	NS	NS	NS	NS	NS	NS	NS	NS	NS	SLOW	NS	NS	NS	NS	NS	NS	NS	NS	NS	NS	NS	NS	NS	NS	NS	NS	NS	NS	NS	NS	NS	NS	NS	NS
SPNCRNA.284	NS	FAST	NS	NS	FAST	NS	NS	FAST	NS	NS	NS	SLOW	NS	NS	NS	NS	NS	NS	NS	NS	NS	FAST	NS	NS	NS	NS	NS	NS	NS	NS	NS	NS	NS	NS	NS	NS	NS	NS	FAST	NS	NS	NS	FAST
SPNCRNA.289	NS	NS	NS	NS	NS	NS	NS	NS	NS	SLOW	NS	NS	NS	NS	NS	NS	NS	NS	NS	NS	NS	NS	NS	NS	SLOW	NS	NS	NS	NS	NS	NS	NS	NS	NS	NS	NS	NS	NS	NS	NS	NS	NS	NS
SPNCRNA.30	FAST	NS	NS	NS	NS	NS	NS	FAST	NS	NS	NS	SLOW	FAST	NS	NS	NS	NS	NS	NS	NS	NS	FAST	NS	NS	FAST	NS	NS	NS	NS	NS	SLOW	FAST	FAST	NS	NS	NS	NS	NS	NS	NS	NS	NS	FAST
SPNCRNA.31	NS	FAST	NS	NS	NS	NS	NS	NS	NS	NS	NS	NS	NS	FAST	NS	NS	NS	NS	NS	NS	NS	FAST	NS	FAST	NS	NS	NS	NS	NS	NS	NS	NS	NS	NS	NS	NS	NS	SLOW	NS	NS	NS	NS	FAST
SPNCRNA.335	NS	NS	NS	NS	NS	NS	NS	SLOW	NS	SLOW	NS	NS	SLOW	SLOW	NS	NS	NS	SLOW	SLOW	NS	SLOW	NS	FAST	FAST	NS	NS	SLOW	SLOW	NS	NS	NS	NS	NS	NS	NS	NS	NS	NS	FAST	NS	SLOW	SLOW	SLOW
SPNCRNA.348	NS	NS	NS	NS	NS	SLOW	NS	NS	NS	NS	SLOW	NS	NS	NS	NS	NS	NS	NS	NS	NS	NS	NS	NS	NS	NS	NS	NS	SLOW	NS	NS	NS	NS	NS	NS	NS	NS	NS	NS	NS	NS	SLOW	NS	NS
SPNCRNA.352	NS	NS	NS	NS	NS	NS	NS	NS	NS	NS	NS	NS	NS	NS	NS	SLOW	NS	NS	NS	NS	SLOW	NS	NS	NS	NS	NS	SLOW	SLOW	NS	NS	NS	NS	NS	NS	NS	NS	NS	NS	NS	SLOW	NS	NS	NS
SPNCRNA.37	FAST	NS	NS	NS	NS	NS	FAST	NS	NS	NS	NS	NS	NS	NS	NS	NS	NS	NS	NS	NS	NS	FAST	NS	FAST	NS	NS	NS	NS	NS	NS	NS	NS	NS	NS	NS	SLOW	NS	NS	NS	NS	NS	NS	FAST
SPNCRNA.377	NS	FAST	NS	NS	NS	NS	FAST	NS	NS	NS	NS	SLOW	NS	NS	NS	NS	NS	NS	NS	NS	NS	FAST	NS	FAST	FAST	FAST	NS	SLOW	NS	NS	NS	FAST	NS	NS	NS	NS	NS	NS	FAST	NS	NS	NS	FAST
SPNCRNA.382	FAST	NS	NS	NS	NS	NS	NS	FAST	NS	NS	NS	SLOW	NS	SLOW	NS	NS	NS	NS	NS	NS	NS	FAST	NS	NS	FAST	NS	NS	NS	NS	NS	NS	NS	NS	NS	NS	NS	SLOW	NS	NS	NS	SLOW	NS	FAST
SPNCRNA.383	NS	NS	NS	NS	NS	NS	NS	NS	NS	SLOW	SLOW	NS	NS	NS	NS	NS	NS	NS	NS	NS	NS	NS	NS	NS	NS	NS	NS	NS	NS	NS	NS	NS	NS	NS	NS	NS	NS	NS	NS	NS	SLOW	NS	NS
SPNCRNA.388	FAST	NS	NS	NS	NS	NS	NS	FAST	NS	NS	FAST	SLOW	NS	NS	NS	NS	NS	NS	NS	NS	NS	FAST	NS	NS	FAST	FAST	NS	NS	NS	FAST	SLOW	FAST	NS	NS	NS	NS	NS	NS	NS	NS	NS	NS	FAST
SPNCRNA.389	FAST	NS	NS	NS	NS	NS	NS	NS	NS	NS	NS	NS	NS	NS	NS	NS	NS	NS	NS	NS	NS	FAST	NS	NS	NS	FAST	NS	NS	NS	NS	NS	NS	NS	NS	NS	NS	NS	NS	FAST	NS	NS	NS	NS
SPNCRNA.394	FAST	NS	NS	NS	NS	NS	NS	NS	NS	NS	NS	NS	NS	NS	NS	NS	NS	NS	NS	NS	NS	FAST	NS	NS	NS	NS	NS	NS	NS	NS	NS	NS	NS	NS	NS	NS	NS	NS	NS	NS	NS	NS	NS
SPNCRNA.399	NS	NS	NS	NS	SLOW	NS	NS	NS	NS	NS	NS	NS	NS	NS	NS	NS	NS	NS	NS	NS	NS	NS	NS	NS	NS	NS	NS	SLOW	NS	SLOW	NS	NS	SLOW	NS	NS	NS	NS	NS	NS	NS	SLOW	NS	NS
SPNCRNA.400	NS	NS	NS	NS	FAST	NS	NS	NS	NS	NS	NS	NS	FAST	NS	NS	NS	NS	NS	NS	NS	NS	FAST	NS	NS	FAST	NS	NS	NS	NS	NS	NS	NS	FAST	NS	NS	NS	NS	NS	FAST	NS	NS	NS	NS
SPNCRNA.401	FAST	NS	NS	NS	NS	NS	NS	NS	NS	FAST	NS	NS	NS	NS	NS	NS	NS	NS	NS	NS	NS	FAST	NS	NS	FAST	FAST	NS	NS	NS	NS	NS	FAST	NS	NS	NS	NS	NS	NS	NS	NS	NS	NS	NS
SPNCRNA.410	NS	NS	NS	NS	NS	NS	NS	NS	NS	SLOW	SLOW	NS	NS	NS	NS	NS	NS	NS	NS	NS	NS	NS	NS	NS	NS	NS	NS	SLOW	NS	NS	NS	NS	NS	NS	NS	NS	NS	NS	NS	NS	NS	NS	NS
SPNCRNA.412	NS	NS	NS	NS	NS	NS	NS	NS	NS	NS	NS	NS	NS	NS	NS	NS	NS	NS	NS	NS	NS	NS	NS	NS	NS	NS	NS	SLOW	NS	NS	NS	NS	NS	NS	NS	NS	NS	NS	NS	NS	NS	NS	NS
SPNCRNA.414	NS	NS	NS	NS	NS	SLOW	NS	NS	NS	NS	SLOW	NS	NS	NS	NS	NS	NS	NS	NS	NS	NS	NS	NS	NS	NS	NS	NS	NS	NS	NS	NS	NS	NS	NS	NS	NS	NS	NS	FAST	NS	NS	NS	NS
SPNCRNA.421	FAST	NS	NS	NS	NS	NS	NS	NS	NS	NS	SLOW	NS	NS	NS	NS	NS	NS	NS	NS	NS	NS	NS	NS	NS	NS	NS	NS	SLOW	NS	NS	SLOW	NS	NS	NS	NS	NS	NS	NS	NS	NS	NS	NS	NS
SPNCRNA.426	NS	NS	NS	NS	NS	NS	NS	NS	NS	SLOW	NS	NS	NS	NS	NS	NS	NS	NS	NS	NS	SLOW	NS	NS	NS	NS	NS	NS	SLOW	NS	NS	NS	NS	NS	SLOW	NS	NS	NS	NS	NS	SLOW	NS	NS	NS
SPNCRNA.452	FAST	NS	NS	NS	NS	NS	NS	NS	NS	NS	NS	NS	NS	SLOW	NS	NS	NS	SLOW	NS	NS	NS	NS	NS	NS	NS	NS	NS	NS	NS	NS	NS	NS	NS	NS	NS	NS	NS	NS	NS	NS	NS	NS	NS
SPNCRNA.46	FAST	NS	NS	NS	NS	NS	NS	NS	FAST	NS	NS	NS	FAST	NS	NS	NS	NS	NS	NS	NS	NS	FAST	NS	NS	FAST	FAST	NS	NS	NS	FAST	NS	FAST	NS	NS	NS	NS	NS	NS	NS	NS	NS	NS	FAST
SPNCRNA.463	NS	NS	NS	NS	NS	SLOW	NS	NS	NS	NS	SLOW	NS	NS	NS	NS	NS	NS	NS	NS	NS	NS	NS	NS	NS	NS	NS	SLOW	NS	NS	NS	NS	NS	NS	NS	NS	NS	NS	NS	NS	NS	NS	NS	NS
SPNCRNA.507	NS	NS	NS	NS	NS	NS	FAST	NS	NS	NS	NS	FAST	NS	NS	NS	NS	NS	NS	NS	NS	NS	NS	NS	NS	NS	FAST	NS	NS	NS	NS	NS	NS	FAST	NS	NS	SLOW	NS	NS	FAST	NS	NS	NS	FAST
SPNCRNA.515	NS	NS	NS	NS	NS	NS	NS	NS	NS	NS	NS	NS	NS	NS	NS	NS	NS	NS	NS	NS	NS	FAST	NS	FAST	FAST	FAST	NS	NS	NS	NS	NS	FAST	NS	NS	NS	NS	NS	NS	FAST	NS	NS	NS	FAST
SPNCRNA.524	NS	NS	NS	NS	NS	NS	NS	NS	NS	NS	NS	NS	NS	NS	NS	NS	NS	NS	NS	NS	SLOW	NS	NS	NS	NS	NS	NS	NS	NS	NS	NS	NS	NS	SLOW	NS	NS	NS	NS	NS	NS	NS	NS	NS
SPNCRNA.538	FAST	NS	NS	NS	NS	NS	NS	NS	NS	NS	NS	NS	NS	NS	NS	NS	NS	NS	NS	NS	NS	FAST	NS	NS	NS	FAST	NS	SLOW	NS	NS	NS	FAST	SLOW	NS	NS	NS	NS	NS	FAST	NS	NS	NS	NS
SPNCRNA.59	NS	NS	NS	NS	FAST	NS	NS	FAST	NS	NS	FAST	NS	FAST	NS	NS	NS	FAST	NS	NS	NS	NS	FAST	NS	NS	NS	FAST	NS	NS	NS	NS	NS	NS	NS	NS	NS	NS	NS	NS	NS	NS	NS	NS	NS
SPNCRNA.628	NS	FAST	FAST	NS	NS	NS	NS	NS	NS	NS	NS	NS	NS	NS	NS	NS	NS	NS	NS	NS	NS	FAST	NS	NS	FAST	NS	NS	NS	NS	NS	NS	NS	NS	NS	NS	NS	NS	NS	NS	NS	NS	NS	FAST
SPNCRNA.650	FAST	NS	NS	NS	NS	NS	NS	NS	NS	NS	NS	NS	NS	NS	NS	NS	NS	NS	FAST	NS	FAST	FAST	NS	NS	FAST	FAST	NS	NS	NS	NS	NS	FAST	NS	NS	NS	NS	NS	NS	NS	NS	NS	NS	FAST
SPNCRNA.7	NS	NS	NS	NS	SLOW	NS	NS	NS	NS	NS	NS	NS	NS	NS	NS	NS	NS	NS	NS	NS	NS	NS	NS	NS	NS	NS	NS	NS	NS	NS	NS	NS	NS	NS	NS	NS	NS	NS	NS	NS	NS	NS	NS
SPNCRNA.720	FAST	NS	NS	NS	SLOW	NS	NS	NS	NS	NS	NS	NS	NS	NS	NS	NS	NS	NS	NS	NS	NS	NS	NS	NS	NS	NS	NS	NS	NS	NS	NS	SLOW	NS	SLOW	NS	NS	NS	NS	NS	NS	NS	NS	FAST
SPNCRNA.737	NS	NS	NS	NS	NS	NS	NS	NS	NS	SLOW	NS	NS	NS	NS	NS	NS	NS	NS	SLOW	NS	NS	NS	NS	NS	NS	NS	NS	NS	NS	NS	NS	NS	NS	NS	NS	NS	NS	NS	NS	NS	NS	NS	NS
SPNCRNA.738	NS	NS	NS	NS	NS	FAST	NS	FAST	NS	NS	NS	SLOW	NS	NS	NS	NS	NS	NS	NS	NS	NS	FAST	NS	NS	NS	NS	NS	SLOW	NS	NS	NS	NS	NS	NS	NS	NS	NS	NS	NS	NS	SLOW	NS	NS
SPNCRNA.745	NS	NS	NS	NS	NS	NS	NS	NS	NS	NS	NS	NS	NS	NS	NS	NS	NS	NS	NS	NS	NS	FAST	NS	NS	FAST	FAST	NS	NS	NS	NS	NS	NS	NS	SLOW	NS	NS	NS	NS	FAST	NS	NS	NS	NS
SPNCRNA.780	NS	NS	NS	NS	NS	NS	FAST	NS	NS	NS	NS	NS	NS	NS	NS	NS	NS	NS	SLOW	NS	NS	NS	NS	NS	FAST	NS	NS	NS	NS	NS	NS	NS	NS	NS	NS	NS	NS	NS	NS	NS	NS	NS	NS
SPNCRNA.781	FAST	NS	NS	NS	NS	NS	NS	NS	NS	NS	NS	NS	NS	SLOW	NS	NS	NS	NS	SLOW	NS	NS	NS	SLOW	NS	NS	NS	NS	NS	SLOW	NS	NS	NS	NS	SLOW	NS	NS	NS	NS	NS	NS	NS	NS	NS
SPNCRNA.784	FAST	NS	NS	NS	SLOW	NS	NS	NS	NS	NS	NS	NS	NS	NS	NS	NS	NS	NS	NS	NS	NS	NS	NS	NS	NS	NS	NS	NS	NS	NS	NS	NS	NS	NS	NS	NS	NS	NS	NS	NS	NS	NS	NS
SPNCRNA.79	NS	NS	NS	NS	NS	NS	NS	NS	NS	NS	NS	NS	NS	NS	NS	NS	NS	NS	SLOW	NS	NS	NS	NS	NS	NS	NS	NS	NS	NS	NS	NS	NS	NS	NS	NS	NS	NS	NS	NS	NS	NS	NS	NS
SPNCRNA.808	NS	NS	NS	NS	NS	NS	NS	FAST	NS	NS	NS	SLOW	NS	NS	NS	NS	NS	NS	NS	NS	NS	FAST	NS	NS	FAST	FAST	NS	NS	NS	NS	NS	FAST	NS	NS	NS	NS	NS	NS	FAST	NS	NS	NS	FAST
SPNCRNA.819	FAST	NS	NS	NS	SLOW	NS	FAST	NS	NS	SLOW	NS	NS	NS	NS	NS	NS	NS	NS	NS	NS	NS	NS	NS	NS	NS	NS	NS	NS	SLOW	SLOW	NS	NS	NS	NS	NS	NS	NS	NS	NS	NS	NS	NS	FAST
SPNCRNA.87	NS	NS	NS	NS	NS	NS	NS	NS	NS	NS	NS	NS	NS	NS	NS	NS	NS	NS	NS	NS	FAST	FAST	NS	NS	NS	NS	NS	NS	NS	NS	NS	NS	NS	NS	NS	NS	NS	NS	NS	NS	NS	FAST	FAST
SPNCRNA.90	NS	NS	NS	NS	NS	FAST	NS	NS	NS	NS	FAST	SLOW	NS	NS	NS	NS	NS	NS	NS	NS	NS	FAST	NS	NS	NS	NS	NS	NS	NS	NS	SLOW	FAST	NS	NS	NS	NS	NS	NS	NS	NS	NS	NS	FAST
SPNCRNA.900	NS	NS	NS	NS	SLOW	NS	NS	NS	NS	SLOW	NS	NS	NS	SLOW	NS	NS	NS	NS	SLOW	NS	SLOW	NS	NS	NS	SLOW	NS	SLOW	NS	NS	NS	NS	NS	NS	NS	NS	NS	NS	NS	NS	NS	NS	NS	NS
SPNCRNA.93	NS	NS	NS	NS	NS	NS	NS	NS	NS	NS	NS	NS	NS	NS	NS	NS	NS	NS	NS	NS	NS	NS	NS	NS	NS	NS	NS	NS	NS	NS	NS	NS	NS	NS	NS	NS	NS	NS	NS	NS	NS	NS	FAST
SPNCRNA.934	FAST	NS	NS	NS	NS	NS	NS	NS	NS	FAST	FAST	NS	NS	NS	NS	NS	NS	NS	NS	NS	NS	FAST	NS	NS	FAST	FAST	NS	NS	NS	NS	NS	FAST	NS	NS	NS	NS	NS	NS	NS	NS	NS	NS	FAST
SPNCRNA.942	FAST	NS	NS	NS	NS	NS	NS	FAST	NS	NS	SLOW	NS	NS	NS	NS	NS	NS	NS	NS	NS	NS	FAST	NS	NS	NS	NS	NS	NS	NS	NS	NS	NS	NS	SLOW	NS	NS	NS	NS	NS	NS	NS	NS	NS
SPNCRNA.965	FAST	NS	NS	NS	FAST	NS	NS	FAST	NS	NS	NS	SLOW	NS	NS	NS	NS	NS	NS	NS	NS	NS	FAST	NS	NS	FAST	NS	NS	NS	NS	NS	SLOW	FAST	NS	NS	NS	NS	NS	NS	NS	NS	NS	NS	FAST
SPNCRNA.974	FAST	NS	NS	NS	NS	NS	NS	FAST	NS	NS	NS	NS	NS	NS	NS	NS	NS	NS	NS	NS	NS	FAST	NS	NS	FAST	NS	FAST	NS	NS	NS	NS	NS	NS	NS	NS	NS	NS	NS	NS	NS	NS	NS	FAST
SPNCRNA.989	NS	NS	NS	NS	NS	NS	NS	NS	NS	SLOW	NS	NS	NS	NS	NS	NS	NS	NS	NS	NS	NS	NS	NS	NS	NS	NS	NS	NS	NS	NS	NS	NS	NS	NS	NS	NS	NS	NS	NS	NS	NS	NS	FAST
SPNCRNA.996	NS	NS	NS	NS	FAST	NS	NS	NS	NS	NS	NS	SLOW	NS	FAST	NS	NS	NS	NS	NS	NS	NS	FAST	NS	NS	FAST	NS	NS	NS	NS	NS	NS	NS	NS	NS	NS	NS	NS	NS	NS	NS	NS	FAST	NS
